# Supplementary material for: RNA splicing programs define tissue compartments and cell types at single-cell resolution
Source: eLife journal article supplement (doi:10.7554/elife.70692), 2021-09-13
Supplement: supp [file elife-70692-supp-v1.zip]

Archive with 18 entries (18 files):
- elife_poa_e70692_Transparent_Reporting_File.docx
- elife_poa_e70692_Figure_2_figure_supplement_1.pdf
- elife_poa_e70692_Figure_2_figure_supplement_2.pdf
- elife_poa_e70692_Figure_2_figure_supplement_3.pdf
- elife_poa_e70692_Figure_3_figure_supplement_1.pdf
- elife_poa_e70692_Figure_3_figure_supplement_2.pdf
- elife_poa_e70692_Figure_4_figure_supplement_1.pdf
- elife_poa_e70692_Figure_4_figure_supplement_2.pdf
- elife_poa_e70692_Figure_5_figure_supplement_1.pdf
- elife_poa_e70692_Figure_6_figure_supplement_1.pdf
- elife_poa_e70692_Figure_7_figure_supplement_1.pdf
- elife_poa_e70692_Figure_8_figure_supplement_1.pdf
- elife_poa_e70692_Figure_8_figure_supplement_2.pdf
- elife_poa_e70692_Supplementary_file_1.tsv
- elife_poa_e70692_Supplementary_file_2.xlsx
- elife_poa_e70692_Supplementary_file_3.xlsx
- elife_poa_e70692_Supplementary_file_4.csv
- elife_poa_e70692_Supplementary_file_5.txt
