# Supplementary material for: RNA splicing programs define tissue compartments and cell types at single-cell resolution
Source: eLife journal article supplement (doi:10.7554/elife.70692), 2021-09-13

**A**

Correlation by effect size in 10x

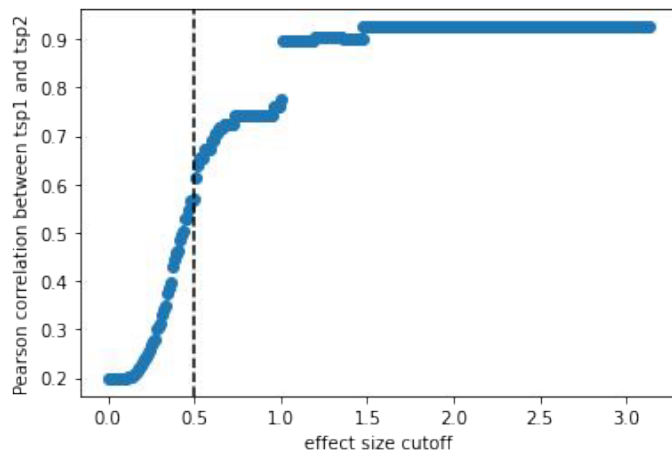

Shared genes by effect size in 10x

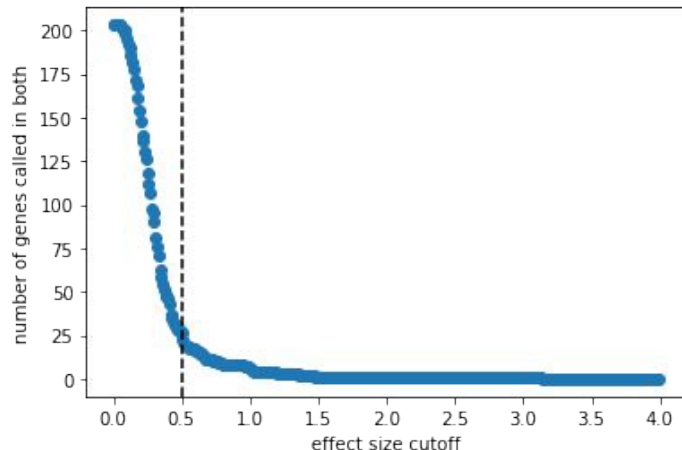**B**

Correlation by effect size in SS2

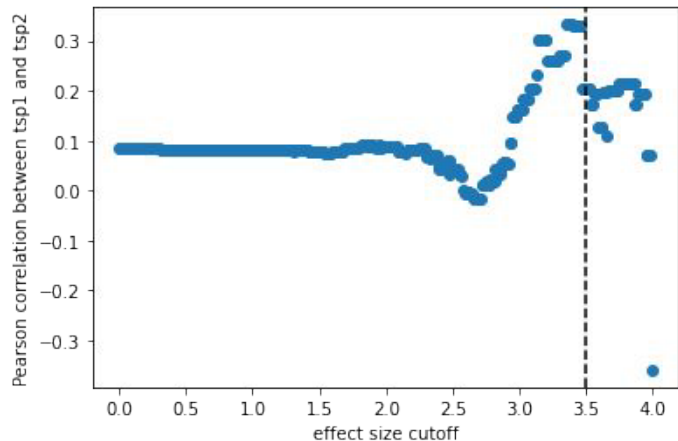

Shared genes by effect size in SS2

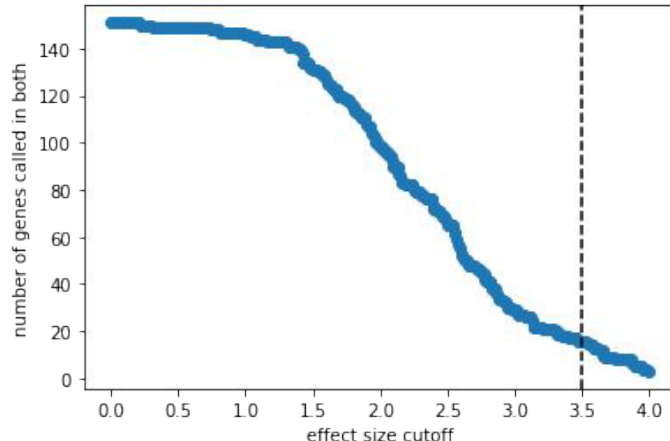

Supplement: supp [file elife-70692-supp-v1.zip]
