# Supplementary material for: RNA splicing programs define tissue compartments and cell types at single-cell resolution
Source: eLife journal article supplement (doi:10.7554/elife.70692), 2021-09-13
Supplement: supp [file elife-70692-supp-v1.zip]

1 2  
3' splice sites

1 2  
3' splice sites

1 2  
3' splice sites

○ 10X  
□ SS2
