# Supplementary material for: RNA splicing programs define tissue compartments and cell types at single-cell resolution
Source: eLife journal article supplement (doi:10.7554/elife.70692), 2021-09-13

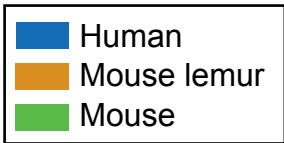

**A**

Endothelial RPS24 Bowtie2 counts  
Read numbers:  
human: 177,008 lemur: 14,192 mouse: 83,484

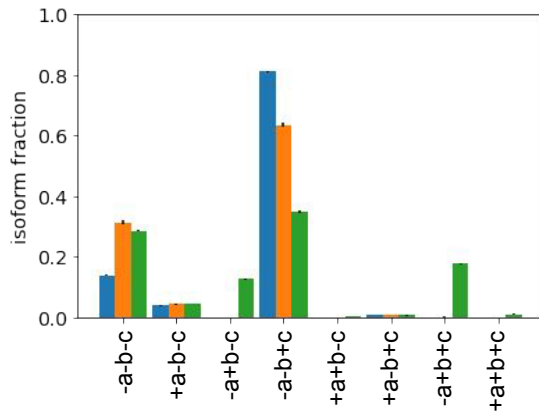

**B**

Epithelial RPS24 Bowtie2 counts  
Read numbers:  
human: 654,432 lemur: 175,768 mouse: 57,444

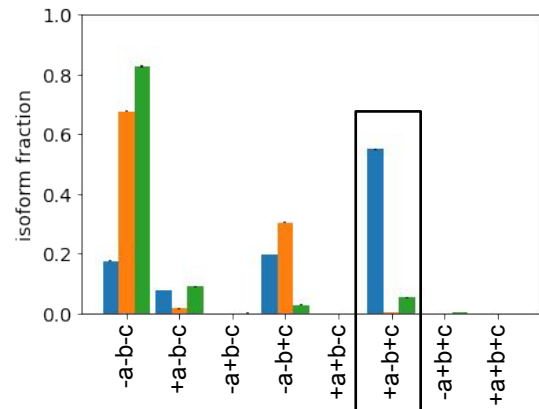

**C**

Immune RPS24 Bowtie2 counts  
Read numbers:  
human: 1,170,120 lemur: 280,682 mouse: 229,852

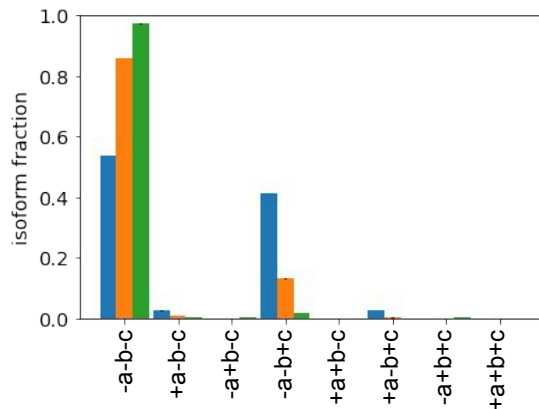

**D**

Stromal RPS24 Bowtie2 counts  
Read numbers:  
human: 553,292 lemur: 50,728 mouse: 71,740

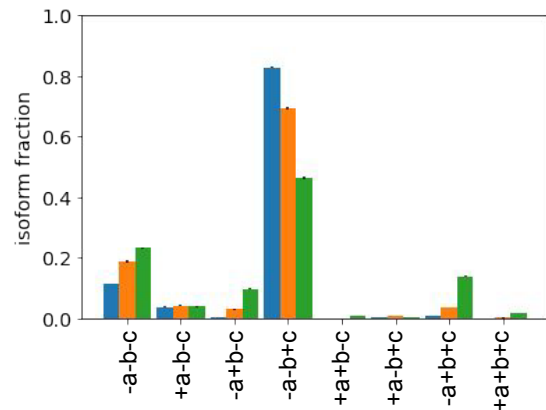

Supplement: supp [file elife-70692-supp-v1.zip › elife_poa_e70692_Figure_4_figure_supplement_2.pdf]
