# Supplementary material for: RNA splicing programs define tissue compartments and cell types at single-cell resolution
Source: eLife journal article supplement (doi:10.7554/elife.70692), 2021-09-13
Supplement: supp [file elife-70692-supp-v1.zip › elife_poa_e70692_Supplementary_file_1.tsv]

Dataset	Species	Individual	Technology	Tissues	Number of cells	Median number of spliced reads per cell	Sex	Age
Tabula Sapiens	human	1	10X	Small_Intestine, Large_Intestine, Thymus, Lymph_Node, Bladder, Muscle, Lung, Vasculature, Trachea, Spleen, Blood, Bone_Marrow	75,789	3,406	F	61 years
Tabula Sapiens	human	1	Smart-Seq2	Bone_Marrow, Blood, Kidney, Large_Intestine, Lung, Lymph_Node, Muscle, Small_Intestine, Spleen, Thymus, Trachea, Vasculature, Bladder	5,203	244,520	F	61 years
Tabula Sapiens	human	2	10X	Bladder, Blood, Lung, Muscle	26,840	3,392	F	59 years
Tabula Sapiens	human	2	Smart-Seq2	Lung, Bladder, Muscle, Blood	2,149	385,613	F	59 years
Tabula Microcebus	mouse lemur	1	10X	Bladder, Bone_marrow, Brain, Colon, Fat, Kidney, Bone, Liver, Lung, Pancreas, Hypothalamus_Pituitary, Eye_retina, Skin, Small_intestine, Spleen, Testes, Tongue, Trachea	88,492	2,396	M	12 years
Tabula Microcebus	mouse lemur	2	10X	Lung, Bone, Heart, Liver, Aorta, Limb_muscle, Colon, Fat, Bladder, Bone_marrow, Brain, Diaphragm, Kidney, Blood, Skin, Small_intestine, Spleen, Tongue, Trachea	76,708	2,518	F	10 years
Tabula Muris	mouse lemur	1	10X	Heart_and_Aorta, Lung, Liver, Kidney, Pancreas, Large_Intestine	11,017	3,609	M	30 months
Tabula Muris	mouse lemur	2	10X	Kidney, Liver, Limb_Muscle, Pancreas, Lung, Large_Intestine	3,683	3,396	M	30 months
Human Spermatogenesis	human	1	10X	testes	9,327	3,341	M	34, 36, 49 years
Mouse Spermatogenesis	mouse lemur	1	10X	testes	9,002	3,500	M	Adult
