# Supplementary material for: RNA splicing programs define tissue compartments and cell types at single-cell resolution
Source: eLife journal article supplement (doi:10.7554/elife.70692), 2021-09-13
Supplement: supp [file elife-70692-supp-v1.zip › elife_poa_e70692_Supplementary_file_2.xlsx]

## Sheet: table3A
geneR1A_uniq	num_onts	sub_col	chi2_pval_adj_scZ	perm_pval_adj_scZ	max_abs_median_scZ	perm_cdf_scZ	chi2_pval_adj_svd_z0	perm_pval_adj_svd_z0	max_abs_median_svd_z0	perm_cdf_svd_z0	chi2_pval_adj_svd_z1	perm_pval_adj_svd_z1	max_abs_median_svd_z1	perm_cdf_svd_z1	chi2_pval_adj_svd_z2	perm_pval_adj_svd_z2	max_abs_median_svd_z2	perm_cdf_svd_z2	f0	f1	f2	gene_max_diff	sig
ACTB	4		0.000798928	0	0.112769	1	1		2.08726		1.68779e-15	0.307485	0.712859	0.89	1		0.0242024		0.624301	0.165387	0.0274814	0	FALSE
RPL31	4		0	0	0.0999829	1	1		0.159773		1		1.46454		1		0.00887687		0.420306	0.334522	0.0737898	0.0380891	FALSE
RPL29	4		0	0	0.9034	1	0	0	1.01905	1	2.5697e-06	0	0.654054	1	0	0	0.727577	1	0.257767	0.186205	0.120517	0	TRUE
RPL28	4		0.0467384	0	0.0198187	1	0	0	2.29657	1	1		0.406152		2.19168e-07	0	0.0467406	1	0.5074	0.220327	0.0511801	0.00780174	FALSE
RPL27	4		0.0204711	0	0.16199	1	1		1.45209		1		0.125132		1		0.298937		0.737735	0.163259	0.0927604	0.0295083	FALSE
RPL27A	4		0	0	0.423737	1	0	0	4.97656	1	8.65359e-14	0	0.0822077	1	0.00474549	0	0.0386055	1	0.797448	0.0712483	0.0393103	0	FALSE
RPL24	4		0	0	0.0355506	1	7.85975e-05	0	2.18384	1	1		0.00406688		4.52756e-09	0	0.0637447	1	0.930247	0.0220694	0.0124719	0.0695881	FALSE
RPL32	4		0	0	0.0701754	1	1		3.22257		1		0.0678442		1		0.0341048		0.864888	0.0575311	0.0356886	0.126883	FALSE
RPL23	4		0	0	0.0419062	1	1		2.68095		1		0.349117		1		0.161007		0.648192	0.269734	0.0391792	0.0714767	FALSE
RPL19	4		0	0	0.0193308	1	0.251864		0.204529		1		0.0905695		0.0212862	0	0.280189	1	0.634224	0.118026	0.0482439	0.0323569	FALSE
RPL18	4		0.000405172	0	0.0195084	1	1		3.34875		0	0	1.21576	1	1		0.928909		0.444765	0.143936	0.132306	0	FALSE
RPL17	4		0	0	0.0549711	1	1.2496e-11	0	0.70802	1	1		0.956234		0	0	1.43314	1	0.760389	0.119908	0.0450265	0.0436296	FALSE
RPL14	4		0	0	0.135102	1	0	0	3.01441	1	0	0	1.3166	1	0	0	0.586203	1	0.593656	0.142803	0.119123	0.120277	FALSE
RPL13	4		0	0	0.0577107	1	0	0	3.22294	1	1		1.03189		0	0	0.170782	1	0.418074	0.168119	0.111939	0.0177791	FALSE
RPL13A	4		0	0	0.0572154	1	0	0	2.82356	1	0	0	2.07043	1	6.36904e-13	0	0.0820578	1	0.759821	0.150969	0.0115641	0.0083651	FALSE
RPL23A	4		1.26246e-10	0	0.049521	1	1		2.34505		1		0.0793017		1		0.108959		0.384359	0.297006	0.195266	8.67362e-18	FALSE
RPL34	4		0	0	0.041104	1	1		3.89312		1		0.028493		1		0.0383782		0.953587	0.0281694	0.0102647	0.00954193	FALSE
RPL35A	4		0	0	0.0579251	1	0	0	4.01154	1	1		0.130119		1		0.202469		0.866312	0.0904615	0.0223776	0.0290133	FALSE
RPL35	4		9.3997e-05	0	0.0220776	1	1		0.0403413		1		0.00112148		1		0.00395217		0.259126	0.214001	0.112854	0.00981977	FALSE
RPN2	4		3.81386e-06	0	0.0883549	1	1		2.40312		8.90127e-09	0.50697	0.524039	0.79	0	0.105319	0.283793	0.97	0.821842	0.0850572	0.041629	0.13664	FALSE
RPLP2	4		0	0	0.0785127	1	0	0	5.76402	1	0	0	1.35958	1	0	0	0.0829507	1	0.932041	0.0508556	0.0107739	0.0187242	FALSE
RPLP1	4		0	0	0.0446488	1	1		2.85318		1		0.106856		1		0.0742365		0.909289	0.033823	0.0249016	0	FALSE
RPL9	4		0.000145267	0	0.0343518	1	1		0.0100223		1		0.00324397		1		0.00473724		0.298936	0.289523	0.239738	0.020572	FALSE
RPL7	4		2.14377e-05	0	0.0277051	1	1		1.76235		1		0.322626		1		0.0914854		0.427531	0.325569	0.213362	0.0325395	FALSE
RPL7A	4		0	0	0.0409741	1	0	0	1.24883	1	0	0	3.16607	1	0	0	1.11038	1	0.65204	0.220448	0.0480957	0.00314992	FALSE
RPL6	4		3.8346e-09	0	0.0531095	1	1		0.327647		1		1.53736		1		0.174826		0.332295	0.20419	0.0515608	0.0290984	FALSE
RPL5	4		0	0	0.0590755	1	0	0	2.45557	1	0	0	2.37501	1	1		0.0214604		0.337691	0.198904	0.0749472	0.0296654	FALSE
RPL4	4		0.00538061	0	0.206158	1	0.314509		0.27395		0	0.47057	0.377476	0.81	1		0.0198989		0.299229	0.186552	0.0913834	0.00978067	FALSE
RPL41	4		0.000226112	0	0.0874161	1	1		2.0015		1		0.0170776		1		0.00789235		0.951271	0.0341512	0.0107596	0	FALSE
RPL3	4		0	0	0.071735	1	1		2.75832		1		0.435986		1		0.116301		0.710048	0.0851887	0.0414717	0.011579	FALSE
RPL37	4		0	0	0.027858	1	1		1.50281		1		1.81915		1		0.00270076		0.602849	0.360667	0.00873068	0.00764818	FALSE
RPL37A	4		0	0	0.0317314	1	1		2.51597		1		0.154834		1		0.0623054		0.955676	0.0330155	0.00723615	0.0466261	FALSE
RPL36	4		0	0	0.0395789	1	1		2.71282		1		0.126393		1		0.0230999		0.640718	0.186892	0.0457749	0.0273834	FALSE
RPL36A-HNRNPH2	4		0	0	0.120967	1	1		2.18628		1		0.0378512		1		0.0170748		0.796898	0.0698382	0.0535049	0	FALSE
RPL12	4		0.000718416	0	0.0182947	1	1		5.26794		1		0.153855		1		0.0513938		0.882282	0.0683103	0.0277077	0.00625338	FALSE
RPS10	4		0	0	0.0595913	1	1		0.67865		1		1.25638		1		0.1938		0.48031	0.175661	0.12735	2.08167e-17	FALSE
RPL11	4		0	0	0.0678084	1	0	0	5.12414	1	0	0	0.73855	1	1		0.389565		0.717939	0.140495	0.0568884	0.0190461	FALSE
RPL10A	4		0	0	0.0230922	1	1		3.29739		1		0.0166125		1		0.116475		0.705276	0.240041	0.0274652	0.0248006	FALSE
POLR2I	4		5.66327e-08	0	0.111747	1	1		1.89122		0.621173		0.599377		1		0.0191649		0.755369	0.172742	0.0540833	0.122364	FALSE
PLIN2	4		0	0	0.709654	1	0	0	2.40991	1	0	0	0.684126	1	1.63275e-14	0	0.255922	1	0.587378	0.223441	0.118222	0.34756	TRUE
PFDN5	4		0	0	0.0983079	1	1		0.0948425		1		2.02795		1		0.380536		0.422854	0.378702	0.103781	0.0536723	FALSE
PABPN1	4		0.0288839	0	0.0517023	1	1		2.4534		1		0.165224		1		0.0457518		0.898302	0.0918763	0.00636655	0.0580102	FALSE
PABPC1	4		6.67614e-15	0	0.116093	1	1		1.68759		1		0.610647		1		0.405213		0.604764	0.145809	0.107768	0.0615835	FALSE
OAZ1	4		4.81218e-07	0	0.0448789	1	1		0.504539		1		1.12196		1		0.00918091		0.334712	0.197789	0.0826626	0	FALSE
unknown_chr6_GL000251v2_alt_4500000	4		0.00578579	0	0.0771816	1	1		1.01638		1		0.860418		1		1.00961		0.504652	0.149497	0.119571	0.0652948	FALSE
NUDC	4		0.00169775	0	0.342255	1	3.43927e-06	0.0674214	1.11209	0.98	0.000168598	0.760455	0.523292	0.35	1		0.0541033		0.57282	0.233715	0.146178	0.476209	FALSE
NFKBIZ	4		0	0	0.892765	1	7.35813e-10	0.0674214	1.49134	0.98	2.83472e-08	0.128322	0.452192	0.96	1		0.27113		0.592742	0.149675	0.138266	0.950931	TRUE
NFKBIA	4		7.14249e-13	0	0.225513	1	0.000262046	0	1.67081	1	0	0.0735385	0.726813	0.98	1		0.274943		0.608204	0.179588	0.0792506	0	FALSE
NENF	4		0.00271598	0	0.193569	1	1		0.753499		3.49435e-12	0.0735385	1.81539	0.98	1		0.0940141		0.611275	0.313379	0.0655799	0.0780723	FALSE
NDUFB8	4		0.172469	0	0.0887539	1	1		1.24743		1		1.50144		1		0.0428682		0.621099	0.249882	0.0607046	0.042041	FALSE
NDUFB2	4		0	0	0.0733956	1	1		2.7617		1		0.0951822		1		0.0187013		0.828636	0.0904184	0.0379932	0.0211043	FALSE
NDUFA4	4		0.000139552	0	0.0402846	1	0	0	3.82801	1	1		0.212525		3.23931e-09	0	0.0493538	1	0.89492	0.100709	0.00321633	0.0329993	FALSE
NPM1	4		2.69696e-11	0	0.155623	1	0.177695	0	2.02563	1	1		0.0817765		0	0	0.309712	1	0.757932	0.176183	0.0268429	0.0923566	FALSE
POSTN	2		2.09975e-14	0	0.397606	1	0.0423096	0	1.40996	1	0	0	1.12146	1	2.77877e-07	0	0.402434	1	0.415733	0.276425	0.146119	0.907839	FALSE
PPP1R12A	4		0	0	0.4355	1	0	0.312233	1.96964	0.88	0	0	1.54197	1	0.497223		0.302214		0.446926	0.182588	0.128728	0.743056	FALSE
PRDX4	4		0.00344471	0	0.0630341	1	1		1.50566		0	0.128322	0.822469	0.96	1		0.00843274		0.817337	0.134824	0.0351437	0.0603324	FALSE
RNF181	4		0.00991231	0	0.230665	1	7.44508e-10	0.0367123	1.17178	0.99	1		0.860592		1		0.362664		0.49127	0.31093	0.111373	0.224763	FALSE
REEP3	3		0.000512107	0	0.251245	1	1		2.12976		0	0	0.7348	1	1		0.194141		0.75555	0.108238	0.0597373	0	FALSE
RDX	4		0.00737997	0	0.180824	1	0.793523		1.76168		1		0.412631		1		0.500906		0.579708	0.114966	0.0923664	0.268753	FALSE
RBM3	4		0.13419	0	0.0848827	1	1		0.343177		1		0.345987		1		0.0769111		0.499241	0.124641	0.111197	0.0524441	FALSE
RBM39	4		0	0	0.314506	1	0	0	1.07387	1	1		0.343689		1		0.124331		0.348161	0.240547	0.0850546	0.275627	FALSE
RACK1	4		0	0	0.0601539	1	0	0	3.1324	1	1		0.557584		1		0.0802846		0.681227	0.119546	0.0839119	0.00928225	FALSE
RABAC1	4		0.000174864	0	0.101584	1	1		1.64962		1		0.0948048		1		0.129373		0.678921	0.175866	0.06218	0.055733	FALSE
PTPRE	2		4.58635e-06	0	0.356	1	1		1.39082		0.000151622	0	0.427024	1	2.77606e-12	0	0.773717	1	0.386909	0.256697	0.124983	0.148465	FALSE
PTMA	4		0	0	0.0699339	1	0	0	2.78174	1	1		0.285948		0	0	0.161597	1	0.872091	0.0697852	0.0204897	0.00200428	FALSE
PTGES3	4		4.43227e-10	0	0.129235	1	0.000496634	0.464069	2.57029	0.8	1		0.00606877		1		0.000491036		0.77918	0.141431	0.0369966	0.216564	FALSE
PSME1	4		0.000402793	0	0.0653525	1	1		0.691148		1		0.628901		1		1.14149		0.605423	0.199886	0.142404	0	FALSE
PSAP	3		0	0	0.776196	1	2.78318e-11	0	0.601806	1	0	0	0.891381	1	0	0	0.715979	1	0.529463	0.120123	0.0917677	0.8169	TRUE
PRMT1	4		2.15806e-05	0	0.949473	1	2.3241e-05	0	0.905263	1	1		0.0064284		1		0.00127399		0.926783	0.0576141	0.0156025	0	TRUE
PRKAR2B	2		0.019464	0	0.168592	1	1		0.970783		1		0.799335		0.518609		0.236091		0.597338	0.232162	0.128002	0.349835	FALSE
PRDX5	4		4.04869e-07	0	0.119522	1	1		2.17775		1		0.365818		1		0.0183382		0.65499	0.217297	0.0724705	0.0288265	FALSE
RPL10	4		0	0	0.0508982	1	0	0	3.07422	1	0	0	0.203421	1	1		0.0145165		0.914892	0.0413593	0.00785047	0.0371648	FALSE
RPS11	4		0	0	0.0455587	1	1		3.3065		1		0.032228		1		0.0297586		0.641761	0.0847439	0.0457759	0	FALSE
RPS12	4		0.0339088	0	0.0342579	1	1		1.82756		0	0	1.65794	1	1		0.0960681		0.727712	0.176263	0.028503	0.0080811	FALSE
RPS13	4		0	0	0.077156	1	1		2.69564		1		0.0274875		1		0.0530272		0.601727	0.167016	0.134593	0.0230263	FALSE
TPRKB	4		0.0573068	0	0.289235	1	1		0.0917098		0.0033392	0.0401681	0.670002	0.99	1		0.0722896		0.854889	0.0669295	0.0408449	0	FALSE
TPM4	4		0.0104958	0	0.0987988	1	1.21525e-10	0.122514	2.12772	0.96	1		1.05306		1.78332e-05	0.409091	0.10064	0.85	0.603504	0.21617	0.0449438	0.0514349	FALSE
TPM2	4		0.128898	0	0.089598	1	0	0	3.10128	1	1		0.517721		1		0.198623		0.714307	0.0808836	0.0620544	0.0911225	FALSE
TPM1	4		0	0	0.631315	1	0	0	1.31276	1	0	0	1.45877	1	0.000693355	0	0.511939	1	0.430323	0.224039	0.104081	0.195864	TRUE
TNFAIP2	3		6.60679e-10	0	0.37601	1	0.231336	0	0.243017	1	3.85891e-06	0	0.35248	1	0.429219		0.195846		0.673119	0.190227	0.117566	0.485375	FALSE
TMSB10	4		1.79603e-14	0	0.0416399	1	1		2.83243		1		0.099523		1		0.0715509		0.249784	0.0776989	0.0675129	0.00472646	FALSE
TPT1	4		0	0	0.0241275	1	0	0	5.55578	1	1		0.677397		1		0.0201019		0.734471	0.0769138	0.0460159	0.0200641	FALSE
TMEM50A	4		0.0323555	0	0.2464	1	3.95741e-05	0.795625	1.16703	0.62	1		0.143352		0.000194073	0.708725	0.32893	0.32	0.59199	0.212211	0.0698197	0.166486	FALSE
TFF3	2		0.0109214	0	0.236101	1	1		2.99963		1		0.0122225		1		0.000483578		0.973916	0.0213174	0.00448315	0.304718	FALSE
TFDP2	3		0.0414709	0	0.186752	1	4.05914e-07	0	2.0264	1	1.37869e-06	0	0.695503	1	1		0.421466		0.523556	0.154818	0.0926639	0	FALSE
TALDO1	4		0.058282	0	0.0833323	1	1		0.345477		1		0.055335		1		0.954326		0.448994	0.269278	0.148015	0.0384463	FALSE
SSR4	4		8.61973e-11	0	0.0770637	1	0	0	3.14803	1	1		0.200434		0	0	0.215221	1	0.831811	0.100049	0.0642335	0	FALSE
SRSF7	4		0.00271598	0	0.153733	1	0.0043659	0.0367123	1.41236	0.99	1		0.60938		3.19603e-14	0	0.420822	1	0.481521	0.228068	0.162643	0.0535228	FALSE
SRSF5	4		0	0	0.0923109	1	1		2.41726		1		0.101712		1		0.0944744		0.910374	0.0384661	0.0341946	0.134537	FALSE
TMEM219	4		0	0	0.157473	1	1		2.07965		1		0.0862489		1		0.00346126		0.95805	0.0184943	0.0150875	0.186533	FALSE
TREM1	3		0.019098	0	0.470811	1	3.83615e-05	0.0674214	1.76485	0.98	0.810385		0.194319		1		0.021291		0.918454	0.0333815	0.0234052	0.523585	FALSE
TXNIP	4		0	0	0.0568041	1	1		1.42233		1		0.776963		1		0.077095		0.275141	0.132489	0.0678563	0	FALSE
TXN	4		1.33052e-09	0	0.0445497	1	1		2.61168		0	0	1.05988	1	1		0.00690367		0.788963	0.15536	0.0398741	0.043271	FALSE
ZFAS1	4		2.35762e-10	0	0.0648922	1	1.13324e-07	0	1.48829	1	1.50213e-14	0	0.13514	1	4.14078e-12	0	0.245819	1	0.649987	0.185546	0.0852247	0.0654811	FALSE
ZFAND5	4		2.18858e-08	0	0.281059	1	1		1.53419		0	0	1.31716	1	1		0.198147		0.610739	0.223253	0.0960823	0.0823873	FALSE
YBX3	4		0.000584523	0	0.0765129	1	1		2.77211		1		0.148743		0	0	0.511646	1	0.539571	0.127483	0.107425	0.037896	FALSE
YBEY	4		1.69095e-08	0	0.57755	1	1		0.148462		1		0.13826		1		0.441134		0.581048	0.190194	0.101028	0	TRUE
XRN2	4		0.00365621	0	0.171142	1	1		1.46622		1		0.163639		1		0.229166		0.646144	0.199221	0.0631373	0.103206	FALSE
WNK1	2		0.00116268	0	0.424385	1	0.480385		0.731971		0.00416586	0	0.963364	1	0.518609		0.318446		0.353499	0.277717	0.18912	0.107367	FALSE
WFDC2	4		0.100011	0	0.290703	1	1		1.43813		1		0.190159		1		0.465863		0.645306	0.172809	0.118929	0.242774	FALSE
VWF	4		0.00140235	0	0.640253	1	1		2.48393		1.47124e-05	0.180377	0.995355	0.94	1		0.0884047		0.436417	0.170306	0.145381	0.511959	TRUE
VIM	4		2.39702e-14	0	0.0443232	1	0	0	1.83056	1	0	0	1.0923	1	1		0.656678		0.519777	0.132657	0.101699	0.063936	FALSE
UQCRQ	4		0.0253272	0	0.125659	1	1		1.80537		1		0.12582		1		0.0239301		0.5842	0.282247	0.110578	0.0325263	FALSE
UQCRB	4		1.72119e-13	0	0.0794254	1	0	0.406786	3.43259	0.83	1		0.0017735		0	0.429268	0.118263	0.84	0.852061	0.130206	0.0153636	0.0713871	FALSE
UQCR11	4		2.09576e-12	0	0.10065	1	1		2.40748		1		0.0620113		1		0.01516		0.957362	0.0290891	0.0124073	0.0395717	FALSE
UFD1	4		0.120569	0	0.0991632	1	1		0.995178		1		1.27587		1		0.116387		0.573049	0.274107	0.10172	0.0430025	FALSE
UBL5	4		0.00219965	0	0.0607443	1	0	0.0367123	2.15255	0.99	0	0.0401681	0.71816	0.99	1		0.0175621		0.726416	0.178802	0.0600044	0.0422765	FALSE
UBA52	4		0	0	0.0306441	1	1		0.410846		1		1.77674		1		1.51157		0.645657	0.21915	0.0951215	0.0521351	FALSE
SPCS3	4		3.88846e-05	0	0.618523	1	1		2.27027		1		0.195184		1		0.0030422		0.917678	0.0764213	0.00471224	0.710093	TRUE
SPARCL1	4		0	0	0.1273	1	1.19366e-13	0	2.03983	1	1		0.606731		1		0.452829		0.572682	0.098074	0.0917094	0.097955	FALSE
SOD2	4		2.22641e-09	0	0.10841	1	5.74073e-09	0	0.691707	1	1		0.499428		1		0.187304		0.567478	0.153892	0.113315	0.13897	FALSE
SNRPB	4		1.5239e-07	0	0.240446	1	1		0.0170493		1		0.0315873		1		0.03294		0.722911	0.159453	0.0658391	0.335086	FALSE
RPS5	4		0	0	0.0990216	1	1		2.74811		1		0.0809847		1		0.209308		0.657685	0.167959	0.0836264	0.039165	FALSE
RPS3	4		0	0	0.111904	1	0	0	6.54342	1	1		0.171295		0	0	1.44376	1	0.72472	0.131104	0.0581501	0	FALSE
RPS2	4		0	0	0.0488305	1	1		0.285571		1		0.009035		1		1.01057		0.278781	0.200509	0.153013	0	FALSE
RPS28	4		5.44337e-13	0	0.0567463	1	1		2.77872		1		0.0534961		1		0.000660359		0.951806	0.0429885	0.00477828	0.0289986	FALSE
RPS27	4		0	0	0.0678831	1	1		1.98074		1		0.0698363		1		0.00601642		0.980591	0.0106303	0.0070985	0.0336526	FALSE
RPS27A	4		0	0	0.0585178	1	1		2.80032		0	0	1.24772	1	1		0.199979		0.671803	0.114555	0.0450151	0.0811158	FALSE
RPS26	4		0	0	0.0712458	1	1		0.0521603		1		1.47692		1		0.00933088		0.720194	0.270627	0.00750043	0.0738444	FALSE
RPS24	4		0	0	1.0413	1	0	0	1.43663	1	0	0	1.12335	1	0	0	1.00863	1	0.455971	0.263185	0.19487	0.0498854	TRUE
RPS23	4		0	0	0.104272	1	0	0	6.32198	1	4.29893e-05	0	0.203355	1	3.66633e-09	0	0.358826	1	0.393064	0.195316	0.162392	0.0634935	FALSE
RPS21	4		0	0	0.0224679	1	0	0.19644	2.91086	0.93	1		0.292661		1		0.0391844		0.949863	0.0268893	0.010274	0.0395777	FALSE
RPS20	4		0	0	0.10069	1	0	0	2.99744	1	0	0	0.526838	1	1		0.0821318		0.78835	0.107407	0.085887	0.0943839	FALSE
RPS19	4		0	0	0.15588	1	0	0	3.46076	1	0	0	0.898719	1	0	0	0.356265	1	0.669222	0.0935453	0.0595857	0.0208992	FALSE
RPS16	4		0	0	0.0334721	1	1		3.16698		0.153224	0	0.0746344	1	1		0.0104051		0.923403	0.0391735	0.00801923	0.0199973	FALSE
RPS15A	4		0	0	0.0304952	1	1		5.08975		1		0.23025		1		0.155548		0.876003	0.0882014	0.0273607	0.00728961	FALSE
RPS14	4		0	0	0.0907005	1	1		1.15453		1		2.73028		1		0.0125064		0.787264	0.177956	0.00981912	0.00738945	FALSE
RPS6	4		0	0	0.0931153	1	1		3.33702		0	0	0.564058	1	1		0.208532		0.617477	0.122608	0.112731	0.0188137	FALSE
NDUFA13	4		0.0160107	0	0.0114698	1	1		2.15788		1		0.372888		1		0.0205239		0.904497	0.0655382	0.019368	0.0170854	FALSE
RPS7	4		0	0	0.0897328	1	0.000992156	0	4.03814	1	0	0	0.763138	1	1		0.0650289		0.821394	0.113653	0.0146487	0.0615082	FALSE
RPSA	4		6.7225e-10	0	0.0229552	1	1		0.986353		1		0.58662		1		0.281627		0.370134	0.211052	0.174445	0.0134546	FALSE
SNHG8	4		0	0	0.384503	1	0	0	1.9975	1	0	0	0.650925	1	1		0.176033		0.846606	0.129006	0.0215622	0.426405	FALSE
SNHG6	4		0	0	0.231956	1	1		1.45297		1		0.513711		1		0.154393		0.589108	0.309098	0.0634176	0.160746	FALSE
SNHG5	4		2.89932e-07	0	0.175427	1	1.28619e-05	0	1.64773	1	1.84437e-12	0	0.543778	1	1		0.0438771		0.475577	0.232808	0.130306	0	FALSE
SNCG	3		0.000158646	0	0.120323	1	4.51999e-07	0	0.861973	1	4.4643e-09	0	1.11461	1	5.33539e-06	0	0.423069	1	0.429272	0.344491	0.14026	0.291405	FALSE
SLMO2-ATP5E	4		0	0	0.0355779	1	1		1.49876		1		0.00416952		1		0.00184902		0.921632	0.073179	0.00518853	0.00915193	FALSE
SKP1	4		1.01825e-05	0	0.274864	1	1		1.50577		0.00364206	0	0.352901	1	1		0.12243		0.626256	0.191448	0.061023	0	FALSE
SFTPC	4		0.150039	0	0.0424855	1	0	0	2.23159	1	0	0	1.11808	1	6.00853e-13	0	0.276819	1	0.328401	0.0781949	0.0431997	0.0494066	FALSE
SFPQ	4		1.29491e-05	0	0.130207	1	1		0.451958		2.80973e-11	0	0.831813	1	1		0.0733172		0.360426	0.222095	0.142988	0.0063031	FALSE
SEC61G	4		8.881e-12	0	0.0658321	1	1		2.61622		1		0.174025		1		0.059821		0.792249	0.13985	0.0522399	0.00265673	FALSE
SAT1	4		4.09547e-07	0	0.0772241	1	1		1.33709		1		0.320023		1		0.0187428		0.745969	0.185145	0.020087	0.0883971	FALSE
SAA2	2		7.38492e-08	0	0.231308	1	3.92447e-07	0	0.200319	1	1		2.97444e-17		1		1.05265e-17		1	4.16053e-32	3.62663e-34	0.382933	FALSE
SAA1	3		0.00815265	0	0.196925	1	0.0140897	0	0.176135	1	1		4.70833e-17		1		1.08712e-17		1	5.09661e-32	6.96e-62	0.19294	FALSE
S100A8	4		1.72593e-05	0	0.186024	1	1		3.6855		1		0.865604		1		0.0175094		0.849514	0.128529	0.00892698	0.158113	FALSE
S100A6	4		0	0	0.0429392	1	1		2.15239		1		0.516526		1		0.00715254		0.473626	0.222448	0.0742718	0.0355562	FALSE
S100A13	4		1.02232e-12	0	0.262235	1	1		0.018014		1		0.00205952		1		0.194034		0.748065	0.207158	0.016881	0.249114	FALSE
RPS8	4		1.13664e-05	0	0.0235153	1	1		2.89895		0	0	1.12477	1	0	0	0.545485	1	0.62997	0.240947	0.03815	0	FALSE
NCOA7	4		0	0	1.10177	1	3.88694e-05	0	1.16615	1	0	0	1.07526	1	0	0	0.834568	1	0.37772	0.197734	0.143205	1.65729	TRUE
POMP	4		3.09623e-13	0	0.0839605	1	1		1.72913		1		0.507399		1		0.233619		0.586224	0.173223	0.15551	0.0854549	FALSE
unknown_chrM_0	4		0	0	0.601176	1	2.18746e-08	0	0.318813	1	1		0.0584928		1		0.0141728		0.0985073	0.0697235	0.055973	0.17658	TRUE
CSRP2	3		3.54445e-08	0	0.438063	1	1		2.46651		1		0.329512		1		0.257399		0.872255	0.0479728	0.0400442	0.346417	FALSE
CYBA	4		8.74912e-09	0	0.0389815	1	1		1.80941		1		1.35125		1		0.132721		0.718193	0.171253	0.0671244	0	FALSE
NASP	4		0.0117299	0	0.0434356	1	3.35049e-07	0	2.27653	1	0.000691059	0.154194	0.310733	0.95	3.82502e-05	0	0.290188	1	0.523166	0.117238	0.104758	0.0850403	FALSE
DEK	4		0.0348139	0	0.178184	1	1		1.76744		1		0.563785		1		0.318308		0.684089	0.213133	0.0766414	0.0663373	FALSE
DNAJA1	4		0.129688	0	0.0801998	1	1		2.16395		2.09679e-06	0	0.296114	1	0	0	0.359609	1	0.577466	0.118489	0.0960588	0.0340998	FALSE
DNAJC15	4		0.00288613	0	0.114748	1	1		1.78774		1		1.27607		0	0.867308	0.47783	0.59	0.721395	0.207546	0.0412356	0.00477397	FALSE
DNAJC2	4		0.00485921	0	0.254654	1	1		1.90619		1		0.135705		1		0.152947		0.78762	0.105355	0.0839061	0	FALSE
EDF1	4		2.2096e-10	0	0.0355456	1	1		2.03018		1		0.316215		1		0.0119478		0.905762	0.0794672	0.00728313	0	FALSE
EEF1G	4		0.00108222	0	0.0537671	1	1		0.712118		1		0.636393		1		0.0544426		0.304435	0.177067	0.134146	0	FALSE
EIF1	4		2.42313e-08	0	0.0294536	1	1		1.26206		1		1.56957		1		0.0483107		0.660344	0.30899	0.00601376	0.0242675	FALSE
EIF3H	4		0.058282	0	0.150678	1	1		0.569897		1		0.194449		1		0.0585216		0.736109	0.1703	0.0593331	0.0203932	FALSE
ARID5B	4		5.80115e-08	0	0.068597	1	2.22558e-06	0	2.22869	1	0	0	0.439199	1	0	0	0.505426	1	0.717582	0.132459	0.0700979	0.00597653	FALSE
EIF4A2	3		6.03099e-06	0	0.426541	1	1.69761e-10	0	1.41433	1	0.000594494	0	0.851634	1	1		0.073968		0.433054	0.243453	0.136195	0.707108	FALSE
AKAP9	4		0.000943048	0	0.531443	1	1		1.33324		0.0278413	0.180377	0.499419	0.94	1		0.199083		0.408207	0.178973	0.116054	0	TRUE
ERLEC1	4		0.00325515	0	0.135482	1	1		2.20739		0	0.0735385	0.600204	0.98	1		0.0161828		0.813052	0.0998886	0.0403262	0	FALSE
FAM162A	4		0.0414709	0	0.177856	1	1		1.40247		1		0.940515		1		0.113319		0.61272	0.368841	0.0105338	0	FALSE
FAU	4		1.82734e-13	0	0.0232808	1	1		2.37525		1		0.170028		0	0	0.25026	1	0.929104	0.0421086	0.0116481	0	FALSE
FKBP5	4		0.000923976	0	0.111503	1	0.0140897	0.0367123	2.06852	0.99	1.19388e-12	0.102429	0.912306	0.97	1		0.0179086		0.525922	0.122796	0.113702	0	FALSE
FOS	4		1.11794e-05	0	0.0967048	1	1		2.25816		1		0.783676		1		0.0134874		0.839786	0.123369	0.0153888	0	FALSE
FST	2		0.146964	0	0.257665	1	1		1.1452		1		0.0826082		1		0.138233		0.552534	0.244532	0.155695	0	FALSE
FTH1	4		0.0870839	0	0.0139015	1	1		0.440352		1		0.322795		1		2.10932		0.337127	0.18847	0.0898322	0.0156992	FALSE
GADD45B	4		0.0153649	0	0.0791869	1	1		1.07168		0	0.259157	2.05216	0.91	1		0.0138934		0.730078	0.212641	0.00705361	0	FALSE
GAS5	4		0	0	0.0617208	1	0	0	2.19831	1	1		0.183849		0	0	0.258825	1	0.619157	0.140151	0.126923	0	FALSE
AKAP13	4		3.80039e-13	0	0.138912	1	1		2.00078		1		0.561208		0	0	0.636965	1	0.498569	0.132082	0.0708926	0.132037	FALSE
HADHA	4		0.01785	0	0.106875	1	1		1.55166		0.000224632	0.0735385	0.455718	0.98	0.64709		0.0754089		0.535925	0.14597	0.124574	0.112324	FALSE
HNRNPA3	4		1.32056e-14	0	0.260814	1	6.94611e-12	0	1.36021	1	1		0.23794		1		0.0804567		0.520843	0.183266	0.141297	0.130012	FALSE
HNRNPDL	4		0.00222605	0	0.248791	1	1		1.58205		1		0.429136		1		0.341958		0.536223	0.165869	0.128944	0.193878	FALSE
HNRNPD	4		0.00271598	0	0.338851	1	0.0202388	0.19644	1.74378	0.93	1		0.317592		0.000284826	0	0.540349	1	0.567913	0.186165	0.116849	0.325027	FALSE
HP1BP3	4		0.00652186	0	0.180572	1	1		1.34802		0.955347		0.541444		0.00983381	0	0.627235	1	0.584208	0.147203	0.108775	0	FALSE
CSNK1A1	4		0.058282	0	0.0834817	1	1		1.97615		1		0.498446		1		0.104679		0.621905	0.100388	0.0566646	0	FALSE
HSP90AA1	4		0	0	0.0758621	1	0	0	2.30368	1	0	0	0.472062	1	1		0.0569973		0.496568	0.0728212	0.060934	0.0573156	FALSE
CRIP1	4		0.12417	0	0.0646218	1	1		3.19132		1		0.11386		1		0.01337		0.913699	0.0686386	0.010341	0.00651009	FALSE
COX6C	4		6.79152e-06	0	0.025889	1	0	0	4.36626	1	0	0.591584	0.568237	0.75	0	0	0.648624	1	0.900835	0.0498104	0.032131	1.9082e-17	FALSE
ARL6IP1	4		1.02544e-06	0	0.0798946	1	0	0.0367123	1.99502	0.99	0.0940073	0.429947	0.201393	0.83	1		0.0512572		0.71382	0.172976	0.0573048	0.126912	FALSE
ARPC2	4		5.49638e-05	0	0.110838	1	1		2.38063		1		0.318259		1		0.0237102		0.7293	0.083823	0.0491445	0	FALSE
ASPH	4		1.00876e-10	0	0.415838	1	3.56599e-12	0	1.62321	1	9.40809e-13	0	0.594556	1	0.0315012	0	0.14982	1	0.415649	0.115571	0.0934056	0	FALSE
ATP5F1C	4		0	0	2.07064	1	0	0	3.2127	1	0	0	1.94506	1	0	0	0.855851	1	0.470709	0.353869	0.109229	2.37553	TRUE
ATP5F1D	4		4.04702e-10	0	0.0339782	1	1		1.90997		1		0.00579625		1		0.000853134		0.61752	0.145134	0.120836	0	FALSE
ATP5MC1	4		3.92412e-06	0	0.43214	1	1.41711e-15	0	2.56118	1	1.71363e-11	0	1.4928	1	0	0.9075	0.984061	0.44	0.565406	0.263471	0.160862	0	FALSE
ATP5MD	4		0	0	0.0714537	1	1		2.43392		1		0.165006		1		0.00576633		0.921435	0.0568185	0.0130746	0.0176645	FALSE
ATP5MG	4		1.67137e-07	0	0.0371913	1	1		3.88067		1		0.00196558		1		0.00982315		0.974835	0.0091666	0.00715047	0	FALSE
AREG	4		0	0	0.200304	1	0	0	3.44222	1	1		0.0752203		1.01826e-05	0.138947	0.705074	0.96	0.742222	0.166468	0.0754685	0.23955	FALSE
ATP5PO	4		1.20767e-05	0	0.0696235	1	0	0	3.14857	1	0	0	0.609673	1	1		0.122389		0.819166	0.114126	0.0507284	0.0343309	FALSE
BAZ1A	4		2.38989e-05	0	0.241732	1	1		0.552783		0	0	1.21477	1	1		0.157607		0.550864	0.145399	0.102175	0	FALSE
BAZ2B	3		1.32193e-09	0	1.25931	1	1		0.582657		0.0787111	0.637333	0.577073	0.72	1		0.0667146		0.244952	0.186206	0.10683	0	TRUE
BLVRB	4		5.41351e-05	0	0.0855712	1	1		2.50584		1		0.156688		1		0.0691345		0.78417	0.142682	0.0234618	0.0681986	FALSE
C12orf57	4		5.84692e-05	0	0.0802397	1	1		2.05819		0.0356908	0.205276	0.306596	0.93	0.57734		0.0656146		0.898872	0.0641582	0.0300137	0.0183705	FALSE
CALM1	4		1.78494e-10	0	0.151031	1	1		0.465424		0	0	1.50009	1	1		0.0329948		0.87785	0.0932242	0.00916463	0.0222527	FALSE
APP	3		0.000597879	0	0.704664	1	1		0.158842		1		0.161882		1		0.357624		0.484214	0.281372	0.0937222	0.314275	TRUE
CASP4	4		6.78381e-05	0	0.248146	1	1		2.55843		1		0.297908		1		0.0955534		0.81363	0.116991	0.0279588	0.315244	FALSE
CAST	4		0	0	0.257643	1	0	0	2.62519	1	0	0	1.34513	1	5.89754e-11	0	0.0934178	1	0.483191	0.108645	0.0630292	0.280033	FALSE
CCT4	4		1.61002e-06	0	0.287956	1	1		1.37507		1		0.146212		1		0.0335741		0.52872	0.190819	0.145843	0.147237	FALSE
CD47	4		0	0	0.325403	1	0.243267	0	1.69652	1	0	0	1.0064	1	0	0	0.260658	1	0.589765	0.266016	0.0461568	0.00825264	FALSE
CD55	4		0.00344471	0	0.190504	1	3.31505e-13	0	1.93327	1	1		0.138925		7.02626e-07	0	0.413748	1	0.608188	0.116533	0.111019	0.264104	FALSE
CD63	4		0	0	0.0882264	1	1		1.19942		1		1.4734		1		1.38839		0.406489	0.238829	0.156975	0.0956784	FALSE
CHCHD2	4		0.00100901	0	0.0655093	1	1		2.99888		1		0.127742		1		0.000618633		0.879312	0.0925596	0.0171418	0.0115464	FALSE
CHD1	3		0.065066	0	0.18973	1	1		0.487019		1		1.09565		1		0.128305		0.347219	0.274752	0.0872866	0.197428	FALSE
CIRBP	4		0	0	0.179688	1	3.43976e-11	0	1.97966	1	0	0	0.697153	1	0.0514979	0	0.305199	1	0.585803	0.20944	0.0720299	0	FALSE
ALDOA	4		0	0	0.216752	1	0	0	0.516074	1	1		0.0038965		1		0.000310019		0.258211	0.191834	0.148277	0	FALSE
CLU	4		0	0	0.290891	1	0	0	3.36418	1	0	0	1.40103	1	0.628319		0.108182		0.783738	0.113976	0.0182483	0	FALSE
COX5B	4		0	0	0.224589	1	0	0	3.38094	1	0	0	1.22953	1	1		0.0229588		0.855715	0.0992192	0.0423036	0	FALSE
COX6B1	4		2.0196e-07	0	0.0588018	1	0	0	3.51322	1	0	0	1.34544	1	1		0.0134851		0.830463	0.145992	0.00985662	0.00956761	FALSE
COX7A2	4		0.00203574	0	0.0658102	1	1		1.99136		0	0	0.408599	1	1		0.0178256		0.851196	0.0668654	0.0405714	0.0215955	FALSE
HSP90AB1	4		0	0	0.0561029	1	1		1.28774		1		1.02985		1		0.439307		0.435147	0.273531	0.125972	0.0796224	FALSE
EIF3K	4		1.34984e-08	0	0.0380027	1	0	0	2.86467	1	1		0.0509425		1		0.187477		0.886398	0.0512082	0.0327118	0.0207618	FALSE
ARHGAP18	3		0.0313918	0	0.377174	1	1		2.29153		1		0.431722		0.00559203	0.318421	0.23743	0.89	0.69278	0.0867135	0.0698842	0.108731	FALSE
ADIRF	4		2.55259e-09	0	0.17469	1	1		1.40204		1		0.254607		1		0.0199061		0.806307	0.162089	0.0235334	0.0751991	FALSE
MACROD1	4		0.0115106	0	0.364649	1	1		1.35195		1		0.644133		1		0.153172		0.422939	0.347319	0.106524	0	FALSE
LUC7L3	4		1.92648e-09	0	0.244271	1	0.00695526	0.0962874	2.39686	0.97	5.3809e-09	0	0.41355	1	9.61905e-06	0.554198	0.140261	0.78	0.737176	0.110843	0.0456643	0.197118	FALSE
LRRFIP2	4		0	0	0.529871	1	0	0	1.73594	1	0	0	1.13872	1	2.59809e-07	0.039759	0.390468	0.99	0.409411	0.240479	0.120895	0	TRUE
LRRFIP1	4		0.00149666	0	0.300554	1	0	0.0367123	2.63259	0.99	0	0	0.987122	1	0.0233851	0	0.355023	1	0.634152	0.103429	0.0824335	0.506477	FALSE
LRMDA	4		0.000381398	0	0.644907	1	0	0	1.83371	1	1.08257e-07	0	1.54491	1	1		0.226355		0.583281	0.200158	0.0640445	0	TRUE
LMO7	2		5.14037e-08	0	0.947135	1	2.80365e-08	0	2.05117	1	5.00545e-09	0	0.750779	1	1		0.325469		0.533321	0.190658	0.0763247	0.811251	TRUE
HSP90B1	4		3.15929e-07	0	0.070823	1	1.46918e-05	0.0674214	1.91848	0.98	4.25381e-08	0.0401681	0.642281	0.99	0	0.9075	0.624745	0.44	0.641025	0.175985	0.0979965	0.0619515	FALSE
LMNA	4		0	0	0.300713	1	1		2.30355		1		0.387342		1		0.428605		0.546723	0.131406	0.0899896	0.228788	FALSE
LIMCH1	3		0	0	1.4174	1	0	0	1.40793	1	1		0.121112		1		0.0929277		0.841467	0.079782	0.0411509	2.38791	TRUE
MGST2	4		6.34125e-05	0	0.210935	1	0	0.333397	2.16046	0.87	1		0.0242793		3.33807e-15	0.075	0.262188	0.98	0.612762	0.204433	0.122137	0.0919972	FALSE
LGALS3	4		0	0	0.171982	1	1		0.526684		0	0	2.90504	1	1		0.0289732		0.584807	0.264664	0.116592	0.14605	FALSE
LGALS2	2		0.0187523	0	0.234539	1	0	0	1.776	1	1.31613e-06	0	0.965206	1	0.533909		0.214946		0.734747	0.213356	0.0436836	0	FALSE
KRT17	2		0.00117268	0	0.145851	1	0	0	2.29548	1	1		0.000421351		1		0.00190119		0.209432	0.0575763	0.0526248	0	FALSE
ITM2B	4		0	0	0.122119	1	0	0	2.03166	1	1		0.924783		0	0	0.612185	1	0.659476	0.209651	0.0644257	0	FALSE
MATR3	3		0.058282	0	0.471347	1	1		0.119827		1		0.255989		1		0.167154		0.390518	0.168062	0.122808	0	FALSE
MT1X	4		0.00102267	0	0.109828	1	1		2.81115		1		0.0104672		1		0.0919502		0.972139	0.0170131	0.00798846	0.0310378	FALSE
IL1R1	2		0.0744751	0	0.0793163	1	1		1.52378		3.30139e-14	0	0.422329	1	7.00018e-06	0	0.407086	1	0.450239	0.167789	0.115967	0.118468	FALSE
IFI16	4		2.09879e-09	0	0.152304	1	0.295261		1.66849		1		0.987545		2.03657e-07	0	0.492171	1	0.594715	0.210452	0.0881997	0.0252307	FALSE
HSPH1	4		3.12565e-13	0	0.377145	1	0.346297		1.46785		1		0.804255		2.93078e-06	0	0.264393	1	0.486708	0.162776	0.0789675	0.132457	FALSE
IRF1	4		0.000220077	0	0.199438	1	0	0.122514	2.37836	0.96	1.21214e-05	0	0.274937	1	1		0.0278987		0.475602	0.40086	0.0646399	0.168711	FALSE
MT1H	2		0.168498	0	0.13083	1	1		1.45221		1		0.088604		1		0.0737743		0.5675	0.339537	0.0530447	0	FALSE
MT1A	3		0.000478386	0	0.70619	1	0.000404657	0.148889	0.971933	0.95	1		0.317531		1		0.0329737		0.757834	0.155466	0.0866994	0.577105	TRUE
ITGB1BP1	3		6.51434e-08	0	0.282332	1	0	0	1.96079	1	0	0	1.50303	1	1		0.057847		0.53347	0.319198	0.0537854	0.44749	FALSE
HSPE1-MOB4	4		0.0160107	0	0.0579252	1	1		0.331381		1		1.10423		1		0.451328		0.769875	0.109086	0.0612006	0.00765401	FALSE
ITGB1	4		9.82624e-06	0	0.0654159	1	1		2.16685		0.226305	0	0.562053	1	1		0.236859		0.621404	0.115102	0.0920308	0.106392	FALSE
HSPB1	4		1.28076e-13	0	0.102883	1	1		1.98465		1		0.223539		1		0.0699138		0.39107	0.179618	0.0585034	0.17438	FALSE
NAP1L1	4		0	0	0.0740658	1	8.79366e-07	0	1.99335	1	0.103873	0	0.26439	1	1		0.05654		0.432039	0.145154	0.111672	0.0329485	FALSE
MYL6	4		0	0	0.796256	1	0	0	1.46497	1	0	0	0.881341	1	0.00042584	0	0.164741	1	0.552573	0.289098	0.0731411	0.314841	TRUE
PIN4	4		0.0195647	0.0265926	0.364503	0.99	1		0.145173		0.0807535	0.345222	1.16004	0.13	3.0483e-05	0.479032	0.493528	0.82	0.601897	0.358327	0.0360714	0.420184	FALSE
ALKBH7	4		0.114922	0.0265926	0.0409067	0.99	1		1.64834		1		0.057808		1		0.00543114		0.930942	0.062225	0.0068326	0.0736634	FALSE
RSRC2	4		0.0642277	0.0265926	0.239955	0.99	1		1.32341		0.342818		0.185861		0.426418		0.196819		0.336825	0.183194	0.151261	0.11795	FALSE
NAA38	4		0.000329437	0.0265926	0.240325	0.99	1		1.577		7.57171e-05	0.0401681	0.246557	0.99	1		0.00121176		0.919937	0.0711614	0.00890131	0.266968	FALSE
NOP53	4		0.168498	0.0265926	0.0336872	0.99	0	0	2.66162	1	1		0.33315		1		0.333874		0.544804	0.117385	0.0731004	0.000972699	FALSE
ACTG1	4		0.0286778	0.0265926	0.477437	0.99	1		0.272392		1		0.208042		1		0.133582		0.327398	0.181152	0.0938424	0.258974	FALSE
ATP5MPL	4		0.000152489	0.0265926	0.143847	0.99	1		2.7118		1		0.0204768		1		0.0513747		0.90882	0.0419354	0.0270594	0.163777	FALSE
SEC14L1	4		0	0.0265926	0.442272	0.99	0	0.593115	2.33046	0.73	1		0.066015		0.194242	0.630882	0.187593	0.74	0.677946	0.0941975	0.0592024	0	FALSE
APLP2	4		0.187804	0.0265926	0.0871986	0.99	1		2.41875		0.852922		1.01055		1		0.222748		0.484052	0.206455	0.132976	0.0414489	FALSE
CD74	3		0.0101508	0.0265926	0.120448	0.99	0	0	2.19109	1	0	0	0.518517	1	1		0.0297419		0.481681	0.0552452	0.0318341	0.116932	FALSE
MICOS13	4		0.000760861	0.0265926	0.0926654	0.99	1		1.50806		1		1.2212		1		0.0228224		0.68446	0.303652	0.00886499	0	FALSE
RRBP1	4		1.55175e-06	0.0265926	0.230071	0.99	1		1.07658		0.0001339	0	0.232663	1	1		0.243616		0.461171	0.235435	0.0902242	0.180102	FALSE
NUDT22	4		0.139055	0.0265926	0.451783	0.99	5.56345e-15	0	1.41297	1	1		0.479821		0.0221848	0.039759	0.500539	0.99	0.50589	0.308289	0.12319	0.107239	FALSE
TM9SF3	3		0.105167	0.0265926	0.383517	0.99	1		1.17322		1		0.0897914		1		0.179433		0.844395	0.0986093	0.0569958	0	FALSE
NUCKS1	4		0.187804	0.0265926	0.0205236	0.99	1		1.0529		0.615258		0.512481		0	0.318421	0.317727	0.89	0.685702	0.205584	0.0686161	0.0142069	FALSE
NDUFB11	4		0.152193	0.0265926	0.0451884	0.99	1		0.31009		0.268773	0.5258	0.736385	0.78	0.000513025	0.039759	0.100002	0.99	0.511999	0.404039	0.083962	0	FALSE
SUB1	4		0.0126978	0.0265926	0.203354	0.99	0	0.0367123	1.59274	0.99	1		0.848435		0	0.877215	0.906728	0.58	0.640786	0.243733	0.0974745	0	FALSE
RPL22L1	4		0.0302997	0.0265926	0.159816	0.99	1		1.94884		0	0.0401681	0.861093	0.99	1		0.040928		0.710295	0.240201	0.0453894	0.109787	FALSE
GSN	4		0.104801	0.0265926	0.0600279	0.99	0	0	1.39118	1	1		0.0805418		1		0.168095		0.278228	0.105518	0.0784216	0.0828874	FALSE
EIF3F	4		0.167375	0.0265926	0.0586642	0.99	1		0.230211		1		1.75973		1		0.00241903		0.603297	0.359966	0.0329966	0	FALSE
FMC1-LUC7L2	3		1.32936e-05	0.0265926	0.47172	0.99	0	0	1.86796	1	1		0.299603		0.0919359	0.075	0.332945	0.98	0.747065	0.123072	0.0714049	0	FALSE
COX7C	4		1.82927e-05	0.0265926	0.102261	0.99	1		2.31858		1		0.0137757		1		0.0266789		0.761857	0.173282	0.0458387	0.0365985	FALSE
MALAT1	3		0.06472	0.0265926	0.318963	0.99	1		0.060918		1		0.0363417		1		0.0770108		0.121302	0.05369	0.0465707	0	FALSE
LMAN1	4		0.000450899	0.0265926	0.0743386	0.99	1		2.06777		1		0.827517		1		0.0137959		0.710993	0.253178	0.026725	0.0469372	FALSE
REX1BD	4		2.32036e-05	0.0265926	0.124773	0.99	1		1.83847		1		0.144165		1		0.0210393		0.855559	0.101255	0.0198343	0.085219	FALSE
ATP5PD	4		0.0145385	0.0505634	0.0383672	0.98	0	0.573498	2.10699	0.74	1		0.227275		1		0.170424		0.787318	0.11247	0.0464675	0.00180766	FALSE
SLTM	4		0.141548	0.0505634	0.109541	0.98	0.000301862	0	2.00928	1	1		0.259743		1		0.113153		0.595692	0.0912085	0.0712139	0.169214	FALSE
PYCARD	2		0.00148102	0.0505634	0.858193	0.98	1.31288e-05	0	0.895645	1	1		0.0877479		1		6.23964e-16		0.913789	0.0862111	3.6629e-31	0	FALSE
SYNE2	4		0.000134743	0.0505634	0.582855	0.98	0.199762	0.573498	1.31172	0.74	7.96815e-07	0.0401681	0.494233	0.99	1		0.147495		0.397607	0.117095	0.0681389	0.568583	FALSE
SPATS2L	4		0.0021595	0.0505634	0.174573	0.98	1		2.68885		1		0.0854645		1		0.0733959		0.8688	0.0448856	0.0274311	0.105496	FALSE
NUSAP1	2		0.0164768	0.0505634	0.162584	0.98	1		1.72176		1		0.0549749		0.535019		0.140815		0.664415	0.112945	0.0915521	0.196962	FALSE
OSBPL8	4		0.00125683	0.0505634	0.196109	0.98	1		1.3753		0.227788	0.284524	0.471682	0.9	1.13759e-05	0	0.488076	1	0.477347	0.192692	0.122637	0	FALSE
UBE2B	4		0.00945062	0.0505634	0.188302	0.98	2.93303e-10	0.122514	2.31964	0.96	1		0.566287		1.23116e-12	0.5016	0.460743	0.81	0.732389	0.115061	0.0858205	0	FALSE
PPFIBP1	3		0.127457	0.0505634	0.164699	0.98	3.73232e-09	0.0367123	2.21782	0.99	0.0149364	0.345222	0.554335	0.87	6.07633e-08	0.192233	0.453604	0.94	0.620587	0.151136	0.101689	0.276443	FALSE
UBE2D2	4		0.00502949	0.0505634	0.114526	0.98	0	0.464069	1.61333	0.8	1		0.7243		1		0.062711		0.464045	0.266087	0.124818	0.132904	FALSE
PLPP3	3		0.00022231	0.0505634	0.239685	0.98	2.61809e-08	0.372222	1.37582	0.85	1		0.00617856		1		0.00249491		0.481614	0.213237	0.168481	0.259534	FALSE
OCIAD2	4		0	0.0505634	0.541141	0.98	0.09289	0.393394	0.315527	0.84	0.59164		0.669811		1		0.460041		0.448232	0.306648	0.101663	0.499144	FALSE
HMGB2	2		1.60251e-06	0.0505634	0.261507	0.98	1		0.0552195		0.000485949	0.385484	0.235727	0.85	1		1.99012e-16		0.993065	0.0069353	8.56448e-31	0.056659	FALSE
PCM1	4		0.113406	0.0505634	0.162764	0.98	1		1.64811		1		0.131962		0.582581		0.205188		0.521746	0.123737	0.0847104	0.133453	FALSE
ENY2	4		0.019996	0.0735154	0.132818	0.97	0	0.0674214	2.2859	0.98	0.0896547	0.620481	0.59153	0.27	1		0.174042		0.570288	0.198842	0.152532	0	FALSE
BOLA3	3		0.105761	0.0735154	0.402929	0.97	0.291367		0.501868		1		0.211167		1		0.074588		0.705502	0.246861	0.0476372	0	FALSE
SEPTIN7	4		0.113406	0.0735154	0.0490579	0.97	0.0700263	0.426903	2.55339	0.82	1		0.224579		0.00511012	0	0.302969	1	0.661485	0.101591	0.0742993	0.00342528	FALSE
REXO2	4		0.13419	0.0735154	0.129508	0.97	0.00175404	0.174783	1.89128	0.94	1		0.103338		0.123477	0.222115	0.330638	0.93	0.654016	0.11463	0.0820276	0.175521	FALSE
RIOK3	3		8.881e-12	0.0735154	0.541808	0.97	0	0.353962	1.12115	0.86	1		0.104003		0.00718298	0	0.356036	1	0.559659	0.224446	0.100204	0.547004	FALSE
ATP5ME	4		0.12344	0.0735154	0.0940423	0.97	1		1.39392		1		0.0302064		1		0.0101912		0.878988	0.0987305	0.0222819	0.178494	FALSE
ANXA5	4		5.14921e-07	0.0735154	0.341727	0.97	0	0.783874	3.34202	0.37	0.554848		0.632768		1		0.658024		0.728299	0.0722448	0.0596957	0.201167	FALSE
CTSL	3		0.00301812	0.0735154	0.547931	0.97	1		0.144008		0.000904955	0	0.795647	1	0.0153869	0	0.450976	1	0.736207	0.15199	0.0949523	0.898846	FALSE
CMC1	4		0.0564982	0.0735154	0.508484	0.97	0.0572095	0.0367123	0.226825	0.99	0.0272298	0.327771	0.387566	0.88	1		0.0926727		0.566856	0.157225	0.0974944	0.247077	FALSE
YWHAZ	3		0.00541693	0.0950993	0.199066	0.96	7.05082e-10	0.333397	2.17823	0.87	1		0.143079		1		0.126472		0.907022	0.0888869	0.00409081	0.15531	FALSE
MNDA	2		0.113406	0.0950993	0.44	0.96	1		1.19033		1		0.028985		1		0.581148		0.632015	0.163918	0.150257	0	FALSE
CAMLG	4		0.107579	0.0950993	0.310078	0.96	1		0.367857		1		0.253066		0.028506	0.249057	0.555705	0.92	0.493723	0.31408	0.173238	0.428463	FALSE
PMP22	3		0.133814	0.0950993	0.118464	0.96	1		2.82062		1		0.455207		1		0.00159952		0.790774	0.171128	0.0233688	0	FALSE
DNAJC1	4		0.0120225	0.0950993	0.161692	0.96	1		2.11583		1		0.158447		1		0.0949024		0.85458	0.0470654	0.0419808	0	FALSE
SNRPF	4		0.0175762	0.0950993	0.0456163	0.96	1		2.42502		1		0.0602893		1		0.0856838		0.800496	0.0992094	0.0591453	0.0557694	FALSE
CCND2	3		8.06543e-05	0.0950993	0.880361	0.96	0	0	2.07032	1	0	0	1.33051	1	0.0637627	0.039759	0.284847	0.99	0.549288	0.318897	0.0900083	0	FALSE
SNHG29	4		0.0564982	0.0950993	0.167031	0.96	0	0	2.02986	1	0.00165912	0.128322	0.46691	0.96	1		0.381778		0.502265	0.187212	0.0882987	0.211391	FALSE
SERF2-C15ORF63	4		0.0160107	0.0950993	0.0396245	0.96	1		2.12579		1		0.0176439		1		0.0882407		0.853818	0.076297	0.0380764	0.0431568	FALSE
CALR	4		0.0010132	0.115064	0.239064	0.95	4.21158e-15	0.265347	0.689194	0.9	0	0.154194	1.10851	0.95	1		0.016103		0.39457	0.348556	0.12521	0.27401	FALSE
MACROH2A1	2		0.0903214	0.115064	0.0695612	0.95	1		0.650265		0.616125		1.21938		1		0.261586		0.328803	0.240696	0.133619	0.00842326	FALSE
CALM2	4		0.00415183	0.115064	0.47367	0.95	1.82117e-13	0.174783	2.06689	0.94	0.000483242	0.180377	0.419896	0.94	1		0.0135435		0.969185	0.0265595	0.00425586	0.0851928	FALSE
ZNF331	2		0.00149666	0.115064	0.625045	0.95	0.00146842	0.48309	0.942561	0.79	1		0.0976987		1		0.579675		0.530447	0.235421	0.132534	0.833623	FALSE
STXBP2	2		0.163653	0.115064	0.144188	0.95	1		1.86722		1		0.202575		1		0.00844978		0.743849	0.232895	0.013469	0.856992	FALSE
ZBTB8OS	4		0.17026	0.115064	0.159215	0.95	1		1.84377		1		0.486825		1		0.253881		0.43113	0.234436	0.112832	0.0723344	FALSE
LIFR	2		0.162717	0.115064	0.186191	0.95	1		1.06209		1		0.873295		1		0.164518		0.573137	0.24839	0.0654583	0	FALSE
SEC62	4		0.00839417	0.115064	0.102215	0.95	1		1.95838		1		0.15445		1		0.187216		0.784279	0.0682981	0.0551379	0	FALSE
CHD2	4		0.000444564	0.115064	0.23624	0.95	0.000946443	0.244873	1.66322	0.91	1		0.190257		0.000290834	0	0.586363	1	0.443688	0.191592	0.106675	0.258146	FALSE
KYNU	2		0.127764	0.115064	0.370266	0.95	1		0.693465		1		0.216476		1		0.219278		0.414396	0.187567	0.146741	0.5	FALSE
CENPW	2		0.00359156	0.135472	0.296116	0.94	0.00702393	0.174783	0.256444	0.94	1		1.25241e-16		1		5.88081e-17		1	3.4412e-32	6.84261e-35	0	FALSE
unknown_chr2_88900000	2		1.06559e-05	0.135472	0.501699	0.94	0.00195175	0.0367123	3.08718	0.99	1		0.323765		1		0.495046		0.290109	0.0505002	0.0412532	0	FALSE
BCAP29	4		0.00578579	0.135472	0.624737	0.94	0.033564	0.122514	0.833957	0.96	1		0.264789		0.00207526	0.554198	0.529989	0.78	0.540194	0.319869	0.0605159	0	FALSE
PAK2	4		2.17699e-06	0.135472	0.338182	0.94	1		1.36344		2.44001e-08	0.0735385	0.454159	0.98	4.72682e-05	0.366667	0.28858	0.87	0.566611	0.165274	0.137379	0	FALSE
SWAP70	2		0.107562	0.135472	0.728589	0.94	0.86586		0.34592		1		0.569158		1		0.19846		0.42523	0.341951	0.192609	0.742765	FALSE
PSMC5	4		0.0577948	0.135472	0.0316629	0.94	1		0.130254		1		0.168043		1		0.0450668		0.52837	0.229005	0.19045	0	FALSE
TRAPPC6A	3		0.12417	0.156087	0.0867462	0.93	1		1.43304		1		0.240172		1		0.630636		0.629542	0.170392	0.152299	0	FALSE
TPR	4		1.6428e-07	0.156087	0.530731	0.93	0	0.517983	1.929	0.23	0.0134684	0.701651	0.497122	0.68	1		0.041914		0.79338	0.171783	0.0259421	0.933229	FALSE
XRCC5	4		0.0313918	0.156087	0.105304	0.93	0.10348	0.726056	1.57545	0.66	1		0.172684		0.324205	0.630882	0.07602	0.74	0.813961	0.105692	0.0618986	0.061947	FALSE
IL33	3		0.0835984	0.156087	0.16873	0.93	1		2.14203		1		0.0202568		1		0.187698		0.75167	0.163683	0.0705543	0	FALSE
SNX6	4		0.182335	0.177833	0.0726161	0.92	1		2.02426		1		0.0936551		1		0.0831295		0.659253	0.0924601	0.0634186	0.114741	FALSE
MICOS10-NBL1	4		0.0985969	0.199444	0.0950116	0.91	1		1.29427		0	0.641759	0.449787	0.71	1		0.0405556		0.80247	0.175424	0.0127164	0.135105	FALSE
SHARPIN	4		0.163774	0.218902	0.971998	0.9	0.0501517	0.148889	0.989862	0.95	0.000289374	0.641759	0.279929	0.71	1		1.92795e-16		0.886912	0.113088	4.27645e-32	0.526094	FALSE
TRMT112	4		0.000196989	0.218902	0.155517	0.9	1		1.79939		1		0.00105803		1		1.72651e-15		0.989439	0.0105607	1.05816e-30	0.064808	FALSE
KRAS	2		1.43949e-05	0.218902	0.709469	0.9	0.00218059	0.913636	1.65273	0.45	0.00466367	0.0401681	0.595224	0.99	0.1275	0.105319	0.383583	0.97	0.832506	0.0835904	0.0527554	0.772592	FALSE
VDAC1	2		0.152193	0.218902	0.551361	0.9	1.82415e-05	0.148889	1.93819	0.95	1		0.532359		1		0.11402		0.790601	0.139147	0.0452837	0	FALSE
SET	4		2.97999e-10	0.260302	0.500468	0.88	0	0.845231	1.03536	0.59	1		0.167687		1		0.216156		0.514329	0.243923	0.163302	0	FALSE
MZT2A	4		0.000318184	0.260302	0.259727	0.88	1		0.0141437		5.91265e-13	0.154194	0.832829	0.95	0	0.641007	0.293628	0.73	0.787739	0.204724	0.00608244	0	FALSE
URI1	2		0.174313	0.260302	0.372492	0.88	0.0285371	0.536	1.62499	0.76	0.00685994	0.327771	0.577102	0.88	1		0.0563229		0.719089	0.169932	0.0681598	0.24531	FALSE
RPL15	4		0.00761837	0.281145	0.046542	0.87	1		0.00150077		1		0.000495553		1		0.00170753		0.450294	0.136754	0.132776	0.0397076	FALSE
EEF2	3		0.156616	0.301862	0.569345	0.86	1		0.0478781		1.66726e-06	0.36173	0.55253	0.86	1		0.0169695		0.252211	0.103372	0.0776772	0.307695	FALSE
GTPBP8	2		0.103701	0.321493	0.34641	0.85	0.440757		0.346971		1		0.100306		1		0.23776		0.4273	0.373351	0.0996113	0	FALSE
PICALM	3		0.052011	0.321493	0.402934	0.85	1		0.290025		1		0.253186		1		0.540062		0.406679	0.230051	0.155939	0.00957098	FALSE
DAB2	4		0.0603523	0.338879	0.348276	0.84	1		0.161001		1		0.0120172		0.0016633	0	0.46909	1	0.320314	0.248035	0.109575	0.0734501	FALSE
UPF3A	4		0.141651	0.338879	0.240103	0.84	0.963773		2.04979		1		0.0789948		0.0429826	0.669231	0.30322	0.71	0.674104	0.105961	0.0686796	0.407964	FALSE
MRPL2	2		0.0110615	0.338879	0.763045	0.84	1		0.053007		0.705188		0.721165		1		0.181699		0.591577	0.216499	0.133233	0	FALSE
METTL26	4		0.00287374	0.338879	0.298725	0.84	1		0.216436		1		0.105471		1		0.137779		0.48292	0.232667	0.14564	0	FALSE
GTF3A	4		0.17026	0.357947	0.316983	0.83	3.34942e-08	0.0367123	1.82266	0.99	1		0.171243		0.00189966	0.764901	0.6765	0.65	0.600753	0.139015	0.0965133	0.184857	FALSE
CIAO2B	4		0.0935125	0.357947	0.0941857	0.83	0.0154411	0.406786	1.2022	0.83	0.0179081	0.36173	0.909678	0.86	1		0.023823		0.771812	0.158083	0.0399757	0.0399333	FALSE
TBCA	4		0.0575192	0.377895	0.0993748	0.82	1		0.724838		1		1.56813		1		0.0111191		0.762013	0.222561	0.0122958	0.0756683	FALSE
TPD52	2		0.0235636	0.416232	0.20454	0.8	1		1.43776		0.000152071	0.345222	0.640372	0.87	1		0.481773		0.534676	0.327422	0.101987	0	FALSE
UTRN	3		0.168687	0.416232	0.378975	0.8	1		0.227007		1		0.314598		1		0.128317		0.443003	0.100632	0.091645	0	FALSE
CARD8	2		0.119526	0.416232	0.312801	0.8	1		1.09755		0.000107343	0.128322	0.914417	0.96	0.559159		0.249181		0.541452	0.411286	0.0313641	0	FALSE
NCOR1	4		0.000740588	0.477283	0.609304	0.77	1		0.261849		1		0.0969566		1		0.327238		0.538979	0.254491	0.0870999	0	FALSE
HNRNPA2B1	4		0.136321	0.517291	0.190672	0.75	1		0.346339		0.937925		0.0710771		0.996621		0.196084		0.610386	0.142445	0.0770074	0.079268	FALSE
ZC3H15	4		0.164062	0.536437	0.298967	0.26	1		0.34022		1		0.198648		1		0.115137		0.670834	0.183357	0.111038	0	FALSE
CHURC1-FNTB	4		0.040925	0.552308	0.221922	0.73	7.51687e-12	0.426903	1.42567	0.82	1		0.143225		1		0.104765		0.692137	0.188748	0.119115	0.314336	FALSE
NUPR1	4		0	0.552308	0.259073	0.73	0	0.122514	3.74867	0.96	1		0.0250682		0.188855	0.541406	0.0297012	0.79	0.937073	0.0410342	0.00767305	0.0837653	FALSE
SRSF11	4		0.00500952	0.552308	0.12933	0.73	0.000169432	0.372222	1.36899	0.85	1		0.153073		1		0.366111		0.570361	0.224607	0.0944806	0	FALSE
CFAP298	4		0.00121481	0.571136	0.544468	0.72	1		0.122248		0.613246		0.473095		0.06147	0.52381	0.132357	0.8	0.868034	0.0859631	0.025841	0.239553	FALSE
ARID4A	4		0.127764	0.589858	0.222967	0.71	3.70903e-09	0.0674214	1.82072	0.98	1		0.228086		0.00559203	0.168367	0.381367	0.95	0.502807	0.171222	0.116603	0.412513	FALSE
ITGA6	2		0.00633161	0.709887	0.797906	0.65	0.00424456	0.406786	0.634427	0.83	1		0.571202		1		0.211724		0.641588	0.208222	0.0870133	0	FALSE
YWHAB	4		0.0764053	0.764258	0.272815	0.62	1		0.352079		1		0.0729477		0	0.249057	1.27578	0.92	0.529117	0.344364	0.0969353	0	FALSE
MGLL	4		0.113406	0.764258	0.34535	0.62	1		0.0311739		1		0.020753		1		0.0278356		0.73072	0.0870056	0.0585952	0.210479	FALSE
ELOC	4		0.0709328	0.764258	0.231768	0.38	0.294807		2.07956		1		0.0116023		1		0.293759		0.567161	0.258178	0.0686529	0.0201878	FALSE
RSF1	4		0.0812159	0.98	0.274119	0.51	0	0.831008	2.99563	0.4	1		0.233544		1		0.29836		0.702314	0.147752	0.0623761	0.0802151	FALSE
RTF1	4		0.0877597	0.98	0.40604	0.51	1		1.35055		2.71683e-05	0.855808	1.18176	0.59	1		0.0547244		0.659346	0.249891	0.044705	0.426479	FALSE
A2M	4		1		0.153499		1		0.510091		1		0.636164		1		1.18325		0.551657	0.20422	0.136055	0.0138543	FALSE
AAMDC	4		0.295725		0.157662		1		1.90171		1		0.227594		1		0.00474697		0.721102	0.1506	0.0224305	0.191762	FALSE
ACADM	2		1		0.29767		1		0.230858		1		0.114719		1		2.46705e-17		0.967901	0.0320988	8.45005e-33	0	FALSE
ACAP2	4		1		0.0812486		0.0258143	0.610081	2.1894	0.72	1		0.00503577		1		0.13792		0.812797	0.115775	0.0371374	0.0458142	FALSE
ACBD3	3		1		0.0986933		1		0.996097		1		1.00801		1		0.0173334		0.642954	0.34341	0.0115073	0	FALSE
ACTA2	4		1		0.102841		0.00175404	0.406786	2.91801	0.83	1		0.0981088		0.0819487	0	0.409841	1	0.288275	0.123687	0.069984	0	FALSE
ADAMTS9	2		1		0.199124		1		0.64138		1		0.238947		1		0.0814098		0.305884	0.166799	0.105762	0.0980983	FALSE
ADH5	3		1		0.0395182		1		0.0322665		1		5.62011e-18		1		1.03313e-18		1	2.85329e-32	1.25896e-61	0	FALSE
ADK	3		0.619536		0.265613		1		1.01126		1		0.241383		1		0.67099		0.503284	0.198169	0.176623	0	FALSE
ADRM1	4		1		0.347515		1		0.348905		1		0.0072683		1		0.0030911		0.87839	0.0594888	0.0376379	0	FALSE
ADSL	3		0.570928		0.705042		0.145968	0.464069	0.716019	0.2	1		0.73038		1		0.0444913		0.629482	0.2892	0.0389118	0	FALSE
AFDN	2		1		0.257226		1		0.112798		1		0.738086		1		0.0553582		0.51159	0.228441	0.188849	0.102736	FALSE
AIG1	2		1		0.0329219		1		0.180918		1		0.104919		1		0.0367272		0.62713	0.124035	0.105577	4.16334e-17	FALSE
AIMP1	4		0.44369		0.138833		1		1.97383		1		0.00684752		1		3.71721e-16		0.962523	0.037477	5.93805e-32	0.152447	FALSE
AK1	4		0.936331		0.133592		0.80994		0.157559		1		0.0199473		1		2.35622e-16		0.76777	0.23223	1.69436e-30	0	FALSE
AKR1A1	4		0.620018		0.183421		1		0.157229		1		1.80284		1		0.0245725		0.487675	0.450548	0.0236877	0.0282435	FALSE
AKR1C1	2		1		0.196252		1		0.0461225		1		0.0105894		1		0.0781339		0.809342	0.10089	0.0439352	2.77556e-17	FALSE
AKR1C3	4		1		0.0376566		1		0.370673		1		1.03759		1		0.640175		0.629269	0.23697	0.106308	0.0215638	FALSE
ALCAM	2		0.420425		0.206705		0.012832	0.98	1.64234	0.51	0.089451	0.641759	0.208182	0.71	1		0.0147755		0.877898	0.108124	0.0139781	0	FALSE
ALG5	4		1		0.0377849		1		0.50818		1		0.798068		1		0.236078		0.43835	0.215817	0.14858	6.245e-17	FALSE
ANAPC11	3		1		0.264574		1		0.00811288		1		0.0116008		1		0.00769227		0.833021	0.06384	0.0427716	1.11022e-16	FALSE
ANAPC5	4		1		0.182997		1		1.40118		1		0.290905		1		0.0236896		0.689234	0.232736	0.0438121	0	FALSE
ANKHD1-EIF4EBP3	4		1		0.223755		1		0.0659337		1		0.207305		1		0.00684606		0.405318	0.30634	0.13118	2.77556e-17	FALSE
ANKRD37	2		1		0.578015		1		0.274746		1		0.294687		1		0.340723		0.659935	0.264894	0.0751708	0	FALSE
ANP32A	4		0.794933		0.148799		0.0712862	0.795625	0.702468	0.62	1		0.00936008		6.47277e-10	0	0.497013	1	0.552942	0.177278	0.120169	2.08167e-17	FALSE
ANP32B	4		1		0.0296991		1		2.0631		1		0.553228		1		0.00832232		0.864572	0.0986006	0.0126003	0	FALSE
ANP32E	3		1		0.204792		1		0.778776		1		0.31545		1		0.363387		0.26032	0.211267	0.16515	0	FALSE
ANTKMT	2		1		0.492449		1		0.494391		1		0.0614882		1		8.06996e-17		0.933729	0.066271	1.08675e-32	0	FALSE
ANXA11	3		1		0.2616		1		0.0101		1		0.0102671		1		0.111203		0.543858	0.315875	0.130365	0	FALSE
ANXA1	4		0.688499		0.0620694		0	0	1.0689	1	1		0.355588		0.00236574	0.039759	0.572324	0.99	0.511422	0.192818	0.100943	0.0506764	FALSE
ANXA2	4		1		0.126603		1		0.0642264		1		0.101847		1		0.00447342		0.368755	0.166254	0.150368	0	FALSE
ANXA4	2		1		0.241698		1		0.00689398		1		0.03192		1		0.258192		0.655678	0.308469	0.0350085	0	FALSE
APBB1IP	3		1		0.442821		1		0.764945		1		1.35912		1		0.358388		0.495777	0.212174	0.12748	0	FALSE
APOC1	4		1		0.0531649		1		2.41959		1		0.0508075		1		0.0637611		0.446587	0.276689	0.0704887	0.0157054	FALSE
APOC2	2		1		0.121534		1		0.123586		1		0.039629		1		1.68134e-16		0.884768	0.115232	1.63045e-30	0	FALSE
APOD	2		0.256748		0.258077		1		2.45003		1		0.0740858		1		0.227448		0.556487	0.0494092	0.0465969	0.297996	FALSE
APOO	2		0.426309		0.148854		1		2.2073		1		0.497491		0.980788		0.150023		0.837963	0.115566	0.0251845	0.275081	FALSE
APPL1	4		1		0.0297057		1		1.89185		1		0.859539		0	0.039759	0.251064	0.99	0.777687	0.183468	0.0185871	0.0329769	FALSE
APRT	4		0.45718		0.0937857		1		0.116421		1		0.0533805		1		0.0262416		0.535619	0.298931	0.160152	0.0535016	FALSE
ARF4	3		0.841421		0.207514		1		1.93202		0.000183854	0	1.62988	1	1		0.093029		0.657581	0.233049	0.0767698	0	FALSE
ARFGAP3	4		1		0.0670525		1		2.37239		1		0.117039		1		0.128304		0.817844	0.0805774	0.0376265	0	FALSE
ARHGAP10	2		1		0.0257444		1		1.08341		0.0159061	0.102429	1.27622	0.97	1		0.135061		0.676079	0.166997	0.0483999	0.150241	FALSE
ARHGAP29	4		1		0.118014		1		1.77546		1		0.893221		1		0.27715		0.510739	0.267903	0.057973	0.0527387	FALSE
ARID4B	4		0.591252		0.102311		6.44309e-07	0.464069	1.78556	0.8	1		0.212622		1		0.186201		0.324252	0.16086	0.139078	0.00693408	FALSE
ARL3	3		1		0.218264		1		0.218033		1		0.0102078		1		1.12833e-16		0.982774	0.0172259	1.14026e-31	0	FALSE
ARL6IP4	4		1		0.189936		1		0.0233688		1		0.0489496		1		0.049989		0.386033	0.33509	0.170967	0.0222968	FALSE
ARPC1B	4		1		0.0109408		1		0.000221407		1		0.000391571		1		5.47995e-05		0.560608	0.388046	0.0231136	0	FALSE
ARPC3	4		0.264474		0.213884		1		1.87313		0	0.591584	0.658133	0.75	1		0.188975		0.59468	0.163538	0.120181	0	FALSE
ARPC5	4		1		0.0920161		1		0.00754434		1		0.0884891		1		0.00384909		0.99048	0.00831427	0.000649461	0	FALSE
ASAH1	2		1		0.0577944		1		1.83385		1		0.0606646		1		0.459876		0.631856	0.163576	0.135392	0.599079	FALSE
ASAP1	3		1		0.077384		1		2.48039		6.5837e-06	0	0.519031	1	1		0.0907039		0.771595	0.127416	0.0620278	0.0102113	FALSE
ASL	4		1		0.153494		1		1.45826		1		0.670587		1		0.152879		0.397274	0.312631	0.250791	0	FALSE
ASS1	3		1		0.132708		1		0.201864		1		0.466537		1		0.823275		0.656497	0.161835	0.146816	0	FALSE
ATF3	4		0.284482		0.104917		0	0	2.86729	1	0	0	0.31053	1	1		0.110059		0.848524	0.0619519	0.041346	0.0123732	FALSE
ATG3	4		1		0.0838005		0.916396		2.2879		1		0.0109099		1		0.230167		0.916432	0.0477701	0.020353	0.0466439	FALSE
ATOX1	4		1		0.0556433		0	0.148889	3.07907	0.95	1		0.0603291		1		0.120041		0.699783	0.179854	0.100712	0.0530469	FALSE
ATP1A1	3		0.463137		0.237627		1		0.846485		1		0.0144038		1		0.0220765		0.72442	0.219593	0.021513	0	FALSE
ATP2B1	3		1		0.162905		1		0.0112586		1		0.0283896		1		0.0543684		0.577562	0.0953308	0.0894153	0	FALSE
ATP5F1A	4		1		0.0130904		1		0.00406335		1		0.0114178		1		3.69256e-17		0.668742	0.331258	1.37669e-29	0	FALSE
ATP5F1B	4		1		0.233739		1		0.0270335		1		0.0238801		1		0.0165867		0.957084	0.0184383	0.00885149	0	FALSE
ATP5IF1	4		1		0.0329945		1		0.043237		1		0.0280429		1		4.46415e-17		0.624458	0.375542	7.80394e-31	0	FALSE
ATP5MC2	4		1		0.0646554		1		0.000705144		1		0.000334445		1		0.00851625		0.768857	0.145075	0.0381761	0	FALSE
ATP5MC3	4		1		0.152182		1		0.0168947		1		0.0118361		1		0.0148591		0.511323	0.32715	0.0891473	0	FALSE
ATP5MF	4		1		0.0656579		0	0	2.14066	1	1		0.32827		1		0.111941		0.821127	0.149311	0.0214689	0.0168941	FALSE
ATP5PF	4		0.636269		0.0214863		1		0.0320208		1		1.19104		1		0.0570491		0.483331	0.249126	0.122547	0.0197891	FALSE
ATP6AP2	3		1		0.148323		1		0.0477299		2.56032e-05	0.637333	1.55969	0.72	1		0.0320977		0.631701	0.349971	0.0152729	0.0348155	FALSE
ATP6V0B	3		1		0.0143666		1		0.0106103		1		0.00649766		1		3.13688e-17		0.996478	0.00352197	5.18939e-30	1.73472e-18	FALSE
ATP6V1D	4		1		0.14894		3.58607e-06	0.883065	2.08592	0.57	1.65551e-07	0.609216	0.443456	0.74	1		0.0754207		0.757397	0.119546	0.074322	0.0528562	FALSE
ATRX	4		1		0.498627		1		0.0438695		1		0.145031		1		0.227979		0.443347	0.320495	0.0626863	0	FALSE
AUP1	4		1		0.12911		1		0.740191		1		0.44401		1		0.894217		0.537234	0.183399	0.133178	0	FALSE
BAX	4		1		0.161955		1		1.73814		1		0.525757		1		0.00510883		0.844619	0.142795	0.0077219	0	FALSE
BCL7C	4		0.730116		0.202501		1		1.03766		1		1.0219		1		0.0452874		0.698736	0.253814	0.0242687	0.0467431	FALSE
BID	2		1		0.0784456		1		0.00564929		1		0.00772061		1		0.0217442		0.621843	0.282386	0.0919839	0	FALSE
BLOC1S1-RDH5	4		0.382543		0.0315418		1		0.723826		1		1.48858		1		0.0531757		0.798981	0.178313	0.0177858	0	FALSE
BNIP2	2		1		0.30429		1		0.0493221		1		0.174553		0.194114	0.641007	0.16398	0.73	0.503016	0.47315	0.0238337	0.0795975	FALSE
BOD1L1	2		1		0.137361		1		0.125478		1		0.0206798		1		9.00682e-18		0.675701	0.324299	1.45472e-32	0.0404166	FALSE
BPIFB1	2		1		0.0167606		0.00208675	0.122514	3.00933	0.96	1		0.71686		1		0.527821		0.645452	0.139461	0.0767583	0.0588962	FALSE
BRD4	2		0.758584		0.415133		0.000394616	0.265347	2.12128	0.9	1		0.169155		1		0.569771		0.69559	0.201447	0.0873061	0	FALSE
BTF3	4		1		0.00798391		1		0.00215905		1		0.00219326		1		0.000933889		0.377851	0.301184	0.118727	0	FALSE
BUD31	4		0.862846		0.174758		1		1.43201		0.852922		1.45291		1		0.0461143		0.493737	0.243356	0.162076	0.0928351	FALSE
BZW1	4		1		0.13661		1		0.0228559		1		0.075596		1		0.141161		0.905874	0.0866135	0.00751242	0	FALSE
BZW2	2		1		0.0270519		1		0.0267514		1		0.014636		1		0.12909		0.647499	0.172231	0.110399	0	FALSE
C11orf58	4		1		0.311914		1		0.301527		1		0.77516		1		0.138729		0.856173	0.0907247	0.0353813	0.0115873	FALSE
C12orf45	2		1		0.0625358		1		1.65223		1		0.0032413		1		0.0013841		0.961004	0.0369703	0.00202545	0	FALSE
C17orf49	4		0.305488		0.13006		0.422512		0.419687		1		1.13781		1		0.0331971		0.434838	0.360179	0.0723067	0.139751	FALSE
C19orf33	4		0.426309		0.0969105		2.70654e-14	0	0.499239	1	1		0.0672889		1		0.253066		0.667389	0.253156	0.0794547	0.0972822	FALSE
C1QB	2		1		0.0874869		1		0.386279		1		0.187472		1		0.00660036		0.441058	0.12189	0.0881328	0.0651485	FALSE
C1orf21	2		1		0.0451537		1		0.494914		1		0.0686168		1		1.82813e-17		0.910022	0.0899785	1.00103e-32	0	FALSE
C1orf35	4		0.898805		0.0853142		1		2.40239		1		0.120602		1		0.00827145		0.834619	0.109044	0.0304434	0.101025	FALSE
C1orf54	3		1		0.196887		1		0.14133		1		0.499271		1		0.0692913		0.436249	0.215838	0.190543	0.357591	FALSE
C3	4		1		0.121557		0.0279814	0	1.23957	1	1		0.0860191		1		0.568628		0.323799	0.17499	0.122602	0.00266063	FALSE
C4orf48	4		1		0.0786574		1		0.406665		1		1.42912		1		0.0408417		0.60583	0.369211	0.0168649	0.0639462	FALSE
C7	2		0.361227		0.0899515		1		0.203996		1		0.126486		0.0354943	0	1.08553	1	0.378341	0.282092	0.188357	0.0913642	FALSE
CA4	2		1		0.0368105		1		0.0150864		1		0.0300263		1		4.76608e-18		0.650807	0.349193	2.20945e-33	6.93889e-18	FALSE
CALCOCO2	4		0.674739		0.159403		1		0.33075		1		0.00314848		1		0.0456514		0.596406	0.307265	0.0493407	0.271869	FALSE
CALCRL	2		0.71649		0.070757		0.525708		1.49011		1		0.0926979		1		0.271173		0.545282	0.186058	0.111979	0.660388	FALSE
CALD1	4		1		0.17674		1		2.22893		3.18909e-05	0.102429	0.522807	0.97	0.335407	0.541406	0.347096	0.79	0.465011	0.176761	0.117305	0.0306515	FALSE
CAMP	3		0.685433		0.105386		1		1.76886		1		0.0155611		1		4.9747e-16		0.986546	0.0134536	9.25076e-32	0.154677	FALSE
CAMTA1	4		1		0.0750934		1		1.76358		1		1.38502		1		0.48268		0.429195	0.340836	0.203884	0	FALSE
CANX	4		1		0.1587		1		1.64785		1		0.476535		1		0.112445		0.640931	0.192236	0.0733645	0.0898887	FALSE
CAPG	4		0.269489		0.398252		1		0.967709		1		1.41105		1		0.357749		0.686659	0.125406	0.101694	0.421991	FALSE
CAPZA2	4		1		0.136827		1		1.42729		1		0.0105796		1		0.022935		0.692501	0.206223	0.090375	0.141863	FALSE
CAPZB	4		0.868661		0.30639		0.000491597	0	1.78077	1	0.603088		0.349761		1		0.321324		0.669349	0.125208	0.0805497	0.352591	FALSE
CARD16	2		0.897803		0.120031		1		0.614359		0.852922		0.487928		1		0.17378		0.613875	0.222053	0.127818	0	FALSE
CASP17P	2		0.263882		0.257129		0.00354506	0.244873	0.697064	0.91	1		0.0400096		1		0.237255		0.610518	0.238735	0.150747	0.464333	FALSE
CASP1	2		1		0.202531		1		0.0292414		1		0.0650076		1		0.261168		0.463118	0.333452	0.110263	0	FALSE
CCAR1	3		1		0.202256		1		1.72767		1		0.0872393		1		0.0186411		0.433517	0.174417	0.120095	0	FALSE
CCDC25	4		1		0.341776		1		0.583542		1		0.89574		0.59705		0.443495		0.479272	0.282303	0.0953969	0	FALSE
CCDC34	2		1		0.069843		1		0.0570266		1		5.3944e-18		1		3.10672e-18		1	2.56889e-32	8.18044e-34	0	FALSE
CCDC47	4		0.770646		0.17598		0.0237111	0	1.04648	1	1		0.613049		1		0.242993		0.486451	0.323434	0.166028	0.148529	FALSE
CCDC50	2		1		0.145479		1		0.0484353		1		0.123656		1		3.40684e-17		0.738328	0.261672	2.47645e-32	0	FALSE
CCDC90B	4		1		0.303213		0.00172958	0.900153	1.74247	0.44	1		0.616749		0.523829		0.295127		0.433347	0.264742	0.122199	0	FALSE
CCDC91	3		1		0.0821325		1		2.35013		1		0.208462		1		0.136324		0.782883	0.072812	0.0325345	0.153602	FALSE
CCNB1	2		1		0.225213		1		0.240478		1		0.0644331		1		4.75627e-17		0.807852	0.192148	8.36653e-33	0	FALSE
CCNH	3		1		0.230808		1		0.0144532		1		0.111316		1		0.167179		0.747466	0.09765	0.0570129	0	FALSE
CCNI	2		1		0.370013		1		0.0583236		1		0.322814		1		0.178		0.60127	0.360376	0.038354	5.55112e-17	FALSE
CCNL1	4		0.260046		0.216174		1		1.25087		0.0578559	0.874638	0.857691	0.43	1		0.0359022		0.485709	0.181721	0.172535	0.167105	FALSE
CCT2	3		1		0.0424736		1		1.57904		1		0.0188366		1		0.00451865		0.815147	0.180185	0.00466809	0.154844	FALSE
CCT3	4		0.694239		0.237807		1		1.06289		1		1.0924		1		0.0669472		0.746728	0.207959	0.0240713	0	FALSE
CCT6A	4		1		0.126323		1		0.105028		1		0.100929		1		0.0255706		0.526637	0.447158	0.020531	0	FALSE
CCT8	2		1		0.181337		1		0.0236179		1		0.117636		1		0.041992		0.356201	0.2836	0.183441	0	FALSE
CD163	4		1		0.110322		1		2.73121		0.00253568	0.259157	0.445618	0.91	0.298423	0.655319	0.659429	0.72	0.542786	0.0836823	0.0756495	0.0815029	FALSE
CD34	2		1		0.381053		1		0.00504145		1		0.17691		1		0.267916		0.506328	0.350746	0.122266	0	FALSE
CD36	4		0.39451		0.140146		1		1.56432		0	0	1.2931	1	1		0.0131769		0.538666	0.200965	0.0915023	0.0099133	FALSE
CD3D	4		0.832075		0.275497		1		1.61913		1		0.086686		1		0.0412185		0.575195	0.177177	0.152605	0.0594606	FALSE
CD44	2		1		0.345633		1		0.556946		0.000273733	0	1.21612	1	1		0.182972		0.472655	0.204839	0.0846542	0	FALSE
CD59	4		1		0.0201452		1		0.00177308		1		0.00134904		1		0.0707448		0.53131	0.322846	0.0863908	0	FALSE
CDC123	3		1		0.297842		1		0.104446		1		0.161917		1		0.110139		0.422992	0.182746	0.171837	0	FALSE
CDC27	2		1		0.270016		1		0.0773678		1		0.137875		1		0.0514785		0.422423	0.169638	0.124583	0.193378	FALSE
CDC40	4		0.794933		0.125153		1		1.50071		1		0.152712		1		0.0384703		0.663013	0.242783	0.0739701	0.244775	FALSE
CDC42	4		1		0.167452		1		0.119871		1		0.0957966		1		0.0220948		0.550919	0.323719	0.125362	0	FALSE
CDC5L	4		1		0.465191		1		0.0673109		1		0.0215498		1		0.459292		0.648219	0.280686	0.0521981	0	FALSE
CDKN3	2		1		0.0954621		1		2.25505		1		0.114198		1		0.0398775		0.922568	0.0431898	0.0190931	0	FALSE
CENPC	2		1		0.182901		1		0.184044		1		0.00140752		1		0.0270073		0.465737	0.422562	0.0639847	0	FALSE
CENPK	2		0.856127		0.118233		1		1.23247		1		0.0791603		1		0.0837975		0.487285	0.194634	0.0926365	0.212132	FALSE
CEP164	2		1		0.589442		1		0.101704		1		0.560503		1		0.438157		0.677296	0.160989	0.120541	0.411016	FALSE
CEP350	2		0.729336		0.182924		1		1.3746		0.0134684	0.128322	0.740324	0.96	1		0.24272		0.609916	0.194941	0.0936722	0.919445	FALSE
CERT1	2		1		0.679366		1		0.115164		1		0.533067		1		0.139364		0.409728	0.25673	0.218958	0	FALSE
CFAP36	4		1		0.0674775		1		1.33967		0.00524139	0.307485	0.996875	0.89	1		0.328982		0.540755	0.173707	0.0966072	0.0665673	FALSE
CFH	3		1		0.109748		0.00457993	0.0962874	2.2921	0.97	1		0.391286		1		0.0748419		0.771527	0.0764458	0.0652184	0	FALSE
CHCHD5	4		1		0.0621828		1		1.65171		1		0.133208		1		0.0391718		0.697849	0.262437	0.0310596	0.0741827	FALSE
CHCHD7	2		1		0.165516		0.0341219	0.0674214	0.907558	0.98	0.136248	0.284524	0.337762	0.9	1		0.0373324		0.349117	0.254044	0.184351	0.17225	FALSE
CHD4	2		1		0.324443		1		0.21968		1		0.286259		1		8.34475e-17		0.797246	0.202754	1.42377e-32	0	FALSE
CHI3L2	3		1		0.175684		1		0.0177156		1		0.18299		1		0.0103782		0.801714	0.191654	0.00663238	0	FALSE
CHID1	4		1		0.0519424		1		0.0503789		1		0.0137481		1		0.0938537		0.467647	0.134233	0.116585	0	FALSE
CHMP2A	4		1		0.0237691		1		0.0216958		1		0.000316907		1		1.11242e-19		0.937207	0.062793	9.68705e-33	0	FALSE
CHORDC1	2		0.455188		0.182962		0.388323		2.02713		1		0.139405		1		0.112343		0.656538	0.140934	0.0536605	0.292319	FALSE
CHPT1	3		1		0.148518		1		0.143248		1		0.158874		1		0.000613788		0.559967	0.421599	0.0184334	0	FALSE
CIB1	4		0.264474		0.0807262		1		1.63405		1		0.135356		1		0.0363668		0.598529	0.343207	0.0301334	0.0510045	FALSE
CIR1	4		1		0.160357		1		1.92961		1		0.00162953		1		0.0742777		0.748235	0.137863	0.0595667	0.00112123	FALSE
CKLF-CMTM1	4		0.504511		0.163945		1.28619e-05	0.174783	1.61169	0.94	1		0.312506		1		0.175145		0.5904	0.31501	0.0573331	0.232016	FALSE
CLEC2B	4		1		0.0991745		1		1.35776		1		0.0270372		1		0.508489		0.544788	0.258536	0.104701	0.0409392	FALSE
CLIC3	4		1		0.0551482		1		0.00934236		1		0.0501954		1		5.03841e-17		0.930523	0.0694772	1.4635e-30	0	FALSE
CLINT1	4		0.688598		0.0919083		1		1.15088		1		0.136137		1		0.0301968		0.441027	0.238124	0.151593	0.00241806	FALSE
CLIP1	2		1		0.24427		1		0.8509		1		0.474782		1		0.280568		0.447431	0.315903	0.112861	0.0272241	FALSE
CLTA	3		1		0.150095		1		1.83844		1		0.0265893		1		0.121265		0.790241	0.164677	0.0247264	0.461033	FALSE
CNIH4	4		1		0.113565		1		2.06748		1		0.119146		1		0.0444674		0.762311	0.216945	0.0122108	0.00142199	FALSE
CNOT2	4		1		0.346775		1		0.0740271		1		0.0394769		1		0.188928		0.361321	0.246182	0.147731	1.11022e-16	FALSE
CNOT6L	2		1		0.107732		1		0.408394		1		1.32239		1		0.00768165		0.543346	0.275334	0.0682498	0.0440481	FALSE
CNPY2	4		1		0.122707		1		0.237008		1		0.229103		1		0.786511		0.425585	0.323479	0.147671	0	FALSE
COL1A2	2		1		0.106957		1		0.00166725		1		0.00170898		1		0.00879808		0.727201	0.107611	0.0558713	0.0038283	FALSE
COL6A3	2		0.44219		0.250535		1		2.33301		0.54832		0.51583		1		0.116268		0.585537	0.110928	0.0708643	0.819075	FALSE
COMMD1	2		1		0.154053		1		0.154941		1		0.065578		1		2.5525e-17		0.708455	0.291545	1.35749e-33	0	FALSE
COMMD6	4		0.619107		0.0748802		1		2.21699		1		0.0689144		1		0.0456869		0.614947	0.143936	0.119636	0	FALSE
COMTD1	2		0.377798		0.102834		1		1.92378		1		0.00428054		1		5.52357e-16		0.98881	0.0111901	3.51235e-32	0	FALSE
COPE	4		0.699272		0.0289632		1		2.60138		1		0.0374407		1		0.103896		0.8157	0.104807	0.0289515	0.0172803	FALSE
COPS2	4		1		0.124745		0.0756961	0.265347	1.34114	0.9	0.226305	0.620481	0.297528	0.73	1		0.131189		0.550384	0.198235	0.184737	0.0162721	FALSE
COPS5	4		1		0.00871725		1		2.60946		1		0.00374169		1		0.00996677		0.98364	0.00861991	0.00727086	0.000109618	FALSE
COPS9	4		1		0.194397		1		0.244652		1		0.00131183		1		9.30783e-17		0.783454	0.216546	1.01767e-30	0	FALSE
COX17	4		1		0.227191		1		0.00213492		1		0.0126189		1		0.235844		0.588729	0.233772	0.129906	0	FALSE
COX4I1	4		1		0.0364537		1		3.03073		1		0.0416597		1		0.0550368		0.944186	0.0161031	0.00863936	0.00257179	FALSE
COX5A	4		1		0.226478		1		0.0567916		0.0414274	0	0.0886948	1	1		0.0101826		0.447122	0.180308	0.154649	0	FALSE
COX7A1	2		1		0.00366403		1		1.99804		1		0.00639719		1		0.00424954		0.992911	0.00588043	0.000999915	0	FALSE
COX7B	4		1		0.0218239		1		2.39905		1		0.0550917		1		0.0559995		0.886062	0.0575887	0.0426678	0.000463687	FALSE
CPNE3	4		1		0.0560692		1		0.0252104		1		1.08488		1		0.0198857		0.802444	0.143962	0.0309824	0.00579515	FALSE
CPNE8	4		1		0.0949158		1		0.0774984		1		2.12389e-17		1		4.3977e-18		1	4.36432e-32	2.14027e-64	0	FALSE
CPVL	4		0.729341		0.194974		1		1.35234		1		0.917475		1		0.433695		0.439653	0.262328	0.151238	0.0196362	FALSE
CRBN	3		0.591747		0.427259		0.286615		2.00755		2.98785e-05	0	0.892042	1	0.245165	0.075	0.372025	0.98	0.631379	0.143864	0.100954	0	FALSE
CREG1	2		1		0.0484236		1		2.19038		1		0.185385		1		0.0295795		0.85005	0.111339	0.0204077	0.0165359	FALSE
CRYL1	4		1		0.0568923		1		0.0258339		1		0.052571		1		0.122567		0.535767	0.211878	0.159797	6.93889e-18	FALSE
CSDE1	3		0.570928		0.211783		1		1.40797		1		0.105155		1		0.288115		0.750103	0.180094	0.0560881	0.0928473	FALSE
CSPP1	2		1		0.111039		0.10348	0.0674214	1.71322	0.98	1		0.225472		1		0.347057		0.355952	0.129902	0.117854	0.361877	FALSE
CST3	4		1		0.153124		1		0.00551509		1		0.00185929		1		0.00261287		0.634471	0.222397	0.0421027	0	FALSE
CSTA	3		1		0.00493685		1		2.48006		1		0.0119821		1		0.0146771		0.979932	0.0128308	0.00669211	0	FALSE
CSTB	2		1		0.0262472		1		0.00183613		1		0.0014894		1		0.000695909		0.530201	0.238943	0.090451	3.46945e-18	FALSE
CTHRC1	2		0.34682		0.189495		3.82663e-07	0.0962874	1.97236	0.97	1		0.17997		1		0.0876541		0.893781	0.0846891	0.0215297	0	FALSE
CTNNAL1	2		1		0.100643		1		0.148171		1		0.354129		1		0.345045		0.780036	0.182002	0.0379624	0	FALSE
CTNNBL1	2		1		0.115136		1		0.0196196		1		0.104775		1		1.40735e-17		0.987061	0.0129385	3.21396e-33	0	FALSE
CTSC	4		0.616559		0.373299		1		0.326258		1		0.160467		1		0.299325		0.568635	0.248073	0.0870598	0.0136923	FALSE
CTSD	2		1		0.16589		1		0.0192671		0.661958		0.290555		1		0.0532526		0.0708639	0.0464864	0.0413087	0.058281	FALSE
CTSH	3		1		0.281118		1		0.521018		1		0.499545		1		0.177563		0.414714	0.172897	0.150297	0.000967533	FALSE
CTSS	2		0.975301		0.0508258		1		1.43785		1		1.69879		1		0.037487		0.696096	0.242318	0.0216589	0.0487415	FALSE
CUX1	2		1		0.218218		1		0.612828		1		0.177329		1		0.0970266		0.523634	0.326335	0.150031	0.00936007	FALSE
CXCL14	4		1		0.0249782		1		3.06512		1		0.00458709		1		0.00527426		0.982656	0.00904434	0.00567473	0.0229153	FALSE
CXCL3	3		1		0.0795808		1		0.00084859		1		0.0763321		1		0.0261897		0.599781	0.320621	0.0795983	0	FALSE
CYB5A	4		0.263882		0.162954		0.315226		2.72013		1		0.0365425		1		0.302774		0.804282	0.110442	0.0373816	0.129741	FALSE
CYC1	3		1		0.0175859		1		0.0143588		1		2.65868e-17		1		1.66167e-18		1	3.20727e-30	6.09032e-34	3.46945e-18	FALSE
CYP20A1	2		1		0.377515		1		0.371452		1		0.213416		1		0.029809		0.611454	0.18965	0.158665	5.55112e-17	FALSE
CYTOR	2		0.783984		0.192147		1		0.0371826		1		0.0935347		0.477296		0.242891		0.82659	0.0823715	0.0692717	0	FALSE
DAD1	4		1		0.0488927		1		3.71123		1		0.0308922		1		0.0199219		0.979717	0.0146215	0.00424156	0.0581236	FALSE
DAPL1	2		0.378747		0.189471		1		1.81484		1		0.00309419		1		0.00268274		0.934592	0.0569123	0.00849563	0	FALSE
DBI	4		0.204357		0.242524		1		0.619064		1		1.23691		1		0.0978266		0.775424	0.167787	0.0407092	0.122015	FALSE
DCN	4		0.999084		0.0599004		0	0	2.45653	1	0.283261		0.424512		5.24547e-05	0.851613	0.855143	0.6	0.556305	0.170418	0.076866	0.072156	FALSE
DCTN3	4		0.699227		0.113474		1		1.66413		1		0.0126733		1		7.00617e-16		0.985699	0.0143013	4.74605e-32	0.184782	FALSE
DCXR	4		0.233232		0.058343		1		2.20191		1		0.186596		1		0.116683		0.882378	0.0475844	0.0274356	0	FALSE
DDX17	4		1		0.19245		1		0.15736		1		0.00186467		1		0.0835495		0.607977	0.363497	0.028526	0	FALSE
DDX18	3		1		0.103918		1		0.0023825		1		0.104615		1		0.00391609		0.83185	0.163642	0.00450815	0	FALSE
DDX21	3		1		0.245899		1		0.0451316		1		0.0764629		0.99856		0.21219		0.930264	0.061011	0.0087246	0.845482	FALSE
DDX39A	2		1		0.107778		1		0.0208576		1		0.0961507		1		3.26719e-17		0.995586	0.00441362	5.65402e-33	0	FALSE
DDX3X	4		0.629459		0.103431		0.683152		1.69012		1		0.450208		0	0	0.355008	1	0.461499	0.161019	0.0905498	0.0571435	FALSE
DDX46	4		0.730116		0.0996831		1		1.55081		1		1.08295		1		0.0426174		0.589021	0.259692	0.0776593	0.0698156	FALSE
DDX5	4		1		0.350541		1		0.0683559		1		0.013192		1		0.266759		0.738222	0.131007	0.0452722	0	FALSE
DECR1	4		0.818205		0.177183		1		1.31329		1		0.792694		0	0.620301	0.53572	0.75	0.522531	0.277374	0.118867	0.0547401	FALSE
DENR	2		1		0.538034		1		0.53424		1		0.050326		1		0.0155904		0.820441	0.156649	0.0192931	0	FALSE
DGUOK	4		0.863091		0.325151		1		0.393185		1		0.0714417		1		0.107214		0.563909	0.239433	0.0910631	0.132592	FALSE
DHPS	3		1		0.593596		1		0.147391		1		0.510461		1		0.224806		0.596001	0.212195	0.119974	1.11022e-16	FALSE
DHRS7	4		0.463137		0.137133		2.14778e-13	0.0367123	3.00273	0.99	1		0.0782136		1		0.0576046		0.708453	0.249932	0.0311099	0.119108	FALSE
DHX36	4		1		0.18618		1		0.00424958		1		0.119444		1		0.0517972		0.646438	0.350303	0.00256273	0.0509543	FALSE
DNAAF4-CCPG1	2		1		0.130189		1		0.114669		1		0.0312309		1		7.68464e-18		0.633666	0.366334	6.79534e-33	5.55112e-17	FALSE
DNAJB1	4		1		0.044232		1		0.0020078		1		0.00148836		1		0.0022155		0.115724	0.11212	0.102736	0	FALSE
DNAJC21	4		0.811997		0.181442		4.82231e-06	0.0962874	1.27619	0.97	1		0.201688		0.00461176	0.92236	0.562281	0.45	0.423383	0.229011	0.105828	0.00431684	FALSE
DNAJC3	3		1		0.15712		0.145968	0.556017	1.59218	0.25	1		0.0342591		1		0.0451087		0.83577	0.109699	0.0545314	0.254604	FALSE
DNAJC4	4		1		0.376194		1		0.0589048		1		0.100798		1		0.112955		0.554447	0.232828	0.0789541	0	FALSE
DNAJC7	2		1		0.494066		1		0.140923		1		0.193921		1		0.228324		0.735275	0.146126	0.0796417	0.364554	FALSE
DNAJC8	4		0.504511		0.0689202		1		1.78588		0.844113		0.762608		1		0.0675478		0.712685	0.213102	0.0434035	0	FALSE
DNMT1	4		0.272116		0.22623		0.752222		1.12814		0.198177	0.102429	0.413422	0.97	1		0.224244		0.446004	0.1947	0.0939561	0	FALSE
DNPH1	3		0.801547		0.157796		1		0.409901		0.442277		0.90988		1		0.00233932		0.86968	0.106708	0.020765	0.056668	FALSE
DPP7	4		0.226804		0.425399		1		0.143532		0.00296708	0.36173	0.414257	0.86	1		0.101593		0.856271	0.115183	0.0253614	0	FALSE
DRAP1	4		1		0.0260457		1		2.08918		1		0.00419741		1		0.000807598		0.970065	0.0247751	0.00235763	0	FALSE
DSTN	2		0.28499		0.253425		1		0.850883		0.613012		0.109025		0.460088		0.267312		0.511409	0.255056	0.2225	0.827171	FALSE
DUT	4		1		0.0694242		1		0.378496		1		1.32203		1		0.000174088		0.742708	0.250241	0.00625276	0	FALSE
DYNC1LI2	4		1		0.151143		1		1.47454		1		0.12444		1		0.0817894		0.465771	0.16197	0.133358	0.0358784	FALSE
EBNA1BP2	4		0.650566		0.279446		1		1.78209		1		0.0294183		1		0.00097566		0.834663	0.141242	0.0240951	0.24536	FALSE
ECH1	3		1		0.0719683		1		0.0656084		1		0.00342446		1		4.33888e-17		0.829949	0.170051	4.78259e-31	0	FALSE
ECI1	4		1		0.159682		1		2.23677		1		0.00231155		1		0.0126961		0.802413	0.169033	0.0237713	0	FALSE
ECRG4	2		1		0.0565233		1		0.0354104		1		0.0337974		1		5.89705e-18		0.991006	0.00899364	3.17943e-32	6.93889e-18	FALSE
ECSCR	2		0.602517		0.21963		1		0.346612		1		0.124219		1		0.0403047		0.659581	0.228316	0.0600971	0.153129	FALSE
EDN1	2		1		0.0288738		1		0.0260204		1		0.0725972		1		0.0384458		0.795561	0.178788	0.0256516	0	FALSE
EDNRB	4		1		0.303002		1		0.0976281		1		0.0743505		1		0.332812		0.850705	0.0891245	0.0551942	0	FALSE
EEA1	4		0.629459		0.117816		0.974534		1.20791		1		0.512305		1		0.16975		0.439758	0.136404	0.0944322	0	FALSE
EEF1A1	4		1		0.0357728		1		0.00086344		1		0.000272623		1		0.000258895		0.107232	0.102453	0.0967665	0	FALSE
EEF1B2	4		0.781206		0.177339		1		0.324664		1		1.40658		1		0.022723		0.907275	0.073364	0.00675783	0.00523956	FALSE
EFHD2	3		1		0.219598		1		0.225912		1		0.0086213		1		0.0298315		0.76944	0.165016	0.0655441	0	FALSE
EIF2AK1	2		0.591462		0.0580096		1		1.56678		0.498163		0.1938		1		0.0660548		0.554061	0.1513	0.10823	0.108134	FALSE
EIF2AK2	4		0.956581		0.248058		1		1.34239		1		0.378828		1		0.0448164		0.354571	0.243363	0.131992	0	FALSE
EIF2AK4	4		1		0.122393		0.0637253	0.353962	1.52405	0.86	1		0.283493		0.877462		0.307107		0.821942	0.0999426	0.0463958	0.134097	FALSE
EIF3A	4		1		0.122169		1		0.0575811		1		0.0950814		1		1.23069e-17		0.690192	0.309808	1.09101e-32	0	FALSE
EIF3D	4		0.868661		0.138032		8.88779e-07	0.448634	1.90296	0.81	0	0.0735385	1.74082	0.98	3.11607e-08	0.272477	0.337387	0.91	0.742994	0.245103	0.00964106	0.0687417	FALSE
EIF3E	4		0.936331		0.0582676		1		0.0497519		1		0.0436153		1		0.0928318		0.388569	0.305349	0.12161	0.0168473	FALSE
EIF3G	4		1		0.0361292		1		0.017556		1		0.0128838		1		0.0112496		0.608076	0.299215	0.0504843	0	FALSE
EIF3L	4		1		0.0245187		1		1.96061		1		0.16173		1		0.0270001		0.864846	0.0486324	0.0231616	0.00116154	FALSE
EIF3M	4		0.773684		0.0961462		0	0	2.35266	1	0	0.0401681	0.734966	0.99	1		0.0956748		0.664099	0.120522	0.0842551	0.00176225	FALSE
EIF4A1	4		1		0.213665		1		0.00302993		1		0.221296		1		0.000307103		0.778007	0.115132	0.0231671	0	FALSE
EIF4A3	4		1		0.126899		1		0.0199027		1		0.12948		1		0.00597046		0.672686	0.181554	0.0961993	0	FALSE
EIF4B	4		0.772697		0.0304354		1		2.41223		1		0.107456		1		0.0517852		0.670438	0.108911	0.0845458	0.0461943	FALSE
EIF4G2	4		1		0.0250111		0	0	2.63445	1	1		0.0608819		1		0.0767802		0.728818	0.119697	0.0858493	0.0278761	FALSE
EIF5A	4		1		0.253786		1		0.0245534		1		0.00925666		1		0.0020167		0.289491	0.10782	0.0916356	0	FALSE
EIF5	4		0.408223		0.117885		1		1.91321		1		0.0078114		1		0.154893		0.670268	0.109307	0.0817394	0.0551277	FALSE
EIF6	4		1		0.0794477		1		0.0457925		1		0.0135428		1		0.0564228		0.56065	0.411431	0.0220978	0	FALSE
ELF1	4		1		0.133476		1		1.0404		1		0.990703		1		0.111896		0.613232	0.183735	0.0686143	0	FALSE
ELOB	4		1		0.0146938		1		1.96898		1		0.0106697		1		0.0354262		0.972039	0.0138227	0.010625	0	FALSE
EMC3	4		1		0.0756258		1		0.0922039		1		0.369377		0.314309	0.678082	1.08203	0.3	0.619237	0.185933	0.116009	0.00452925	FALSE
EML4	2		1		0.162221		1		0.13687		1		0.0498375		1		0.0723293		0.741433	0.137551	0.0973583	1.05444	FALSE
EMP1	2		1		0.243991		1		0.0438643		1		0.0542321		1		0.0690141		0.841415	0.100298	0.0533841	0	FALSE
EMP2	3		1		0.0287599		1		0.0234823		1		7.68035e-18		1		1.18202e-18		1	2.91775e-32	1.12569e-63	3.46945e-18	FALSE
EMP3	4		1		0.150649		1		2.2516		1		0.26102		1		0.0752707		0.671184	0.143247	0.0815418	0	FALSE
ENO1	3		1		0.0627544		1		0.00648591		1		0.0591499		1		0.00186633		0.887525	0.0914853	0.0194704	0	FALSE
EPB41L4A-AS1	4		1		0.12917		1		0.547725		1		0.235165		1		0.0734791		0.716552	0.250162	0.0332853	0	FALSE
EPS15	2		0.65473		0.486768		1		0.158651		1		0.191635		1		0.39171		0.342888	0.198834	0.15275	0	FALSE
EPS8	4		1		0.173265		1		1.71364		1		0.644239		1		0.0602779		0.593066	0.232889	0.0439419	0	FALSE
ERCC1	4		0.269974		0.291022		0.000413406	0.0367123	1.57355	0.99	1		0.288794		1		0.238242		0.547418	0.320517	0.046166	0	FALSE
ERGIC2	4		1		0.124214		1		0.0072597		1		0.00880671		1		0.130402		0.438036	0.21261	0.199242	0	FALSE
ERGIC3	4		1		0.00971982		1		3.18028		1		0.0155244		1		0.0114438		0.79168	0.18814	0.00882577	0.00418938	FALSE
ERICH1	2		1		0.322427		1		0.102089		1		0.117157		1		0.346063		0.353031	0.301868	0.242692	5.55112e-17	FALSE
ERP44	3		1		0.218499		1		0.0400343		1		0.00740896		1		0.18424		0.645341	0.301958	0.036018	2.77556e-17	FALSE
ESD	4		0.931066		0.123764		1		1.75961		0	0.620481	0.867867	0.73	1		0.0294235		0.835624	0.126672	0.0291151	0.111925	FALSE
ETFA	3		0.543808		0.208811		1		1.71894		0.484324		0.931594		1		0.0981498		0.616984	0.137168	0.0999727	0.540335	FALSE
ETFB	4		1		0.0660916		1		0.933947		1		0.274719		1		0.389931		0.486767	0.237428	0.0986915	0	FALSE
ETHE1	4		0.515982		0.204952		6.6036e-07	0.406786	3.02448	0.83	1		0.0394783		1		0.0767774		0.888535	0.0497717	0.0272019	0.217136	FALSE
ETS2	4		0.993094		0.112147		1		0.972386		1		1.10537		1		0.279722		0.592591	0.295491	0.0836747	0.166791	FALSE
EXOSC7	2		1		0.365942		1		0.00152521		1		0.403655		1		0.0538324		0.588238	0.385312	0.02645	0	FALSE
EXOSC8	4		1		0.391882		1		0.157551		1		0.203603		1		0.107746		0.505367	0.229724	0.192298	0	FALSE
EXOSC9	2		1		0.254308		1		1.14636		1		0.55906		0.197264	0.803289	0.443499	0.63	0.628823	0.20207	0.150099	1.64885	FALSE
EZR	3		1		0.0221181		1		2.2745		0.00122368	0.0401681	0.573712	0.99	1		0.124601		0.705262	0.118569	0.0659741	0.0594061	FALSE
F3	2		0.515982		0.206119		1		1.37428		0.121353	0.154194	0.708443	0.95	0.298423	0.366667	0.320606	0.87	0.559244	0.264476	0.102183	0.171807	FALSE
FAAP20	4		0.348836		0.453558		1		0.0454705		1		0.209408		1		0.38332		0.357848	0.298374	0.259707	0.0400945	FALSE
FABP1	2		1		0.0722787		1		3.65736		1		0.0599092		1		0.0514533		0.958806	0.0177396	0.00763841	0.0981328	FALSE
FABP4	4		1		0.0290895		0	0	2.77784	1	1		0.495637		0.0186199	0	0.0224474	1	0.8442	0.115072	0.0118694	4.31453e-06	FALSE
FABP5	4		1		0.0214648		1		1.84516		1		0.19794		1		0.0150099		0.523858	0.435106	0.0374812	0.0234211	FALSE
FAM107B	2		1		0.0743995		1		1.02592		0.973692		0.34999		1		0.266306		0.620298	0.137806	0.0901457	0	FALSE
FAM177A1	4		0.486218		0.185396		0.644054		2.42527		0	0	0.735648	1	0.0145865	0.554198	0.298707	0.78	0.675585	0.206066	0.0420104	0	FALSE
FAM204A	4		1		0.131698		1		2.10518		1		0.417438		1		0.17627		0.659551	0.193381	0.0702294	0.175903	FALSE
FAM50A	4		1		0.0209126		1		0.133677		1		0.0690492		1		0.0597996		0.504096	0.340057	0.133451	0	FALSE
FASTK	2		1		0.376115		1		0.0669203		1		0.371335		1		0.0144923		0.811652	0.185927	0.00242156	5.55112e-17	FALSE
FBL	4		1		0.028677		1		0.0201501		1		0.0167117		1		1.05173e-17		0.585527	0.414473	5.6767e-32	0	FALSE
FBP1	2		1		0.133551		1		0.563858		0.00320366	0.641759	0.280935	0.71	0.000518528	0.641007	0.19325	0.73	0.757185	0.193266	0.0419507	0.513288	FALSE
FBXO9	3		1		0.189043		1		1.86816		1		0.287171		1		0.0569417		0.589134	0.377309	0.0195548	0.058476	FALSE
FCER1G	2		1		0.163104		1		0.025127		1		0.0619748		1		0.23862		0.681259	0.308017	0.00742983	0.560483	FALSE
FCGRT	4		1		0.103184		0	0	2.93171	1	0.34341		0.17401		1		0.0389098		0.580791	0.238127	0.0527892	0.0431151	FALSE
FCHO2	3		0.231787		0.177056		0.0136402	0.795625	1.36935	0.62	1		0.137555		1		0.470328		0.50899	0.22893	0.157865	0.0967843	FALSE
FCN3	4		0.464671		0.200258		1		0.111015		1		0.0709873		1		0.14468		0.977914	0.0162659	0.00582042	0	FALSE
FDPS	4		1		0.0143254		1		0.0151993		1		0.010099		1		0.0612827		0.491497	0.409823	0.0755889	0	FALSE
FEZ2	3		0.868661		0.136351		1		1.41547		1		0.388642		1		0.0400688		0.694689	0.162576	0.0957654	0.0735717	FALSE
FGGY	2		1		0.212274		1		1.46478		1		0.497376		1		0.031865		0.522789	0.265843	0.0918683	0.943678	FALSE
FH	2		1		0.0877058		1		0.0877058		1		7.85487e-16		1		8.87954e-17		1	1.22049e-30	1.23479e-31	0	FALSE
FIBP	4		1		0.113936		1		1.47785		1		0.0422179		1		0.0560561		0.687881	0.205616	0.0944464	0.0321039	FALSE
FIS1	4		1		0.054451		1		0.0232167		1		0.0384638		1		0.0239473		0.859563	0.0780639	0.0573658	0	FALSE
FKBP11	4		1		0.0469345		0	0.517983	4.05585	0.77	0	0.128322	1.27484	0.96	1		0.160062		0.858602	0.102261	0.0235768	0.0482619	FALSE
FKBP2	4		1		0.00578682		0.80994		2.85152		1		0.223832		1		0.0039456		0.836356	0.114778	0.0269539	0.000382056	FALSE
FKBP3	2		1		0.158114		1		0.129099		1		6.22619e-17		1		7.52748e-18		1	9.16902e-32	1.58771e-63	0	FALSE
FLT1	2		1		0.251862		0.281807		0.889374		1		0.192879		1		0.197979		0.660873	0.164623	0.0595682	0	FALSE
FNBP1L	2		0.393469		0.220351		1		1.25627		1		0.202761		1		0.180801		0.384131	0.279823	0.130616	0.0605305	FALSE
FOSB	2		1		0.164654		1		0.0137715		1		0.0841217		1		0.161278		0.597924	0.216046	0.18501	0	FALSE
FOXP1	4		1		0.0907752		1		1.2638		1		0.286725		1		0.254015		0.309442	0.176787	0.123111	0.0813056	FALSE
FRA10AC1	4		0.350409		0.221812		0.364283		1.62138		0.00085537	0.487755	0.827017	0.8	1		0.529173		0.593098	0.179207	0.131308	0.0806074	FALSE
FRG1CP	4		1		0.369302		1		0.254512		1		0.130919		1		0.487362		0.374872	0.302596	0.172243	0.0468978	FALSE
FTL	4		0.284158		0.0362742		1		0.00521358		1		0.00115002		1		0.000391436		0.139478	0.0485622	0.0472093	0.0105782	FALSE
FUOM	3		1		0.083788		1		1.54986		0.0787111	0.205276	0.377128	0.93	1		0.148412		0.801931	0.132646	0.0617818	0	FALSE
FUS	4		1		0.282151		1		0.0276035		1		0.184772		0.58293		0.157689		0.585719	0.391909	0.0223722	0	FALSE
FXYD3	2		0.400438		0.118468		1		2.04633		1		1.12864		1		0.0665514		0.683165	0.192412	0.071371	0.0326076	FALSE
FXYD5	4		1		0.110568		1		1.49514		0.00656146	0.874638	1.15697	0.57	0.279494	0.691216	0.44047	0.69	0.345587	0.242459	0.123563	0.0478713	FALSE
FYB1	2		1		0.201963		1		0.495748		1		1.42955		1		0.410768		0.327558	0.306211	0.0946733	0.970982	FALSE
GADD45A	2		0.646804		0.275355		1		0.0948273		1		0.128955		1		0.212817		0.960689	0.0298247	0.00948636	0	FALSE
GAPDH	4		1		0.0696478		6.89051e-15	0	0.279921	1	1		0.00161137		1		0.000406494		0.176934	0.0698764	0.062077	0	FALSE
GBP2	2		1		0.0603288		1		0.165582		1		0.00308493		1		1.43918e-17		0.892623	0.107377	1.4617e-32	0.0756189	FALSE
GCC2	2		1		0.169433		0.00033847	0.0367123	1.42776	0.99	1		0.152438		1		0.0831246		0.703808	0.167122	0.0881268	0	FALSE
GIHCG	2		0.630473		0.153226		1		0.12724		0.852922		0.190048		1		9.5591e-17		0.632474	0.367526	4.63335e-32	0	FALSE
GLIPR1	3		1		0.163794		0.348102		0.796785		1		0.429831		1		0.0384869		0.67225	0.179238	0.0963727	0.0416831	FALSE
GLRX3	4		1		0.169271		1		1.22666		1		0.253826		0.0488752	0.655319	0.386282	0.72	0.392802	0.207093	0.169371	0	FALSE
GMFG	4		1		0.148078		1		1.38972		1		0.01043		1		0.0212617		0.374621	0.168569	0.136216	0.0147023	FALSE
GNG5	4		1		0.0280929		1		3.11576		1		0.0102525		1		0.00040381		0.958719	0.0263435	0.00949826	0.000721971	FALSE
GNL3	2		0.467514		0.154366		1		1.0454		1		0.43588		1		0.0588943		0.368611	0.276278	0.130908	0.0591605	FALSE
GNLY	2		0.290837		0.107531		1		2.0378		0	0	1.11423	1	0.0926653	0.192233	0.237721	0.94	0.644324	0.154379	0.0927122	0.0652767	FALSE
GOLGB1	2		1		0.466569		1		0.27691		1		0.207418		1		0.309032		0.423285	0.294516	0.191757	0	FALSE
GPATCH4	3		1		0.254292		1		0.395847		1		0.0555669		1		0.00947408		0.704918	0.117532	0.0867361	0	FALSE
GPBP1	3		1		0.144737		1		1.31112		1		0.400764		1		0.288327		0.359586	0.236764	0.224678	0	FALSE
GPCPD1	2		1		0.111024		1		1.83599		0.616125		0.357167		1		0.292265		0.605754	0.156845	0.106185	0.433256	FALSE
GPX4	4		1		0.0280884		1		2.74505		1		0.125402		1		0.0106556		0.914231	0.0440734	0.0149693	0.012648	FALSE
GRSF1	2		1		0.162789		1		0.16176		1		0.0205475		1		1.26135e-17		0.988093	0.0119072	1.88234e-33	2.11817	FALSE
GSPT1	2		1		0.0241351		1		1.03844		1		0.27651		1		0.359864		0.597555	0.228715	0.162998	0	FALSE
GSTK1	3		1		0.311972		1		0.266352		1		0.829445		1		0.0216473		0.740784	0.102479	0.0691221	0.0292506	FALSE
GSTO1	4		1		0.0597492		1		0.644225		1		0.603351		1.4577e-06	0.877215	0.62254	0.58	0.587353	0.185876	0.105407	0.00535729	FALSE
GSTP1	4		0.955509		0.0341841		0	0	1.42563	1	1		0.84375		0	0	1.4268	1	0.474932	0.307241	0.126021	0.0106745	FALSE
GTF2A2	4		1		0.0269507		1		1.36498		1		0.205024		1		0.0293104		0.438388	0.235273	0.122456	0	FALSE
GTF2F2	2		0.276705		0.12968		1		1.49129		1		0.0293327		0.00226591	0.039759	0.254977	0.99	0.843623	0.124993	0.0298815	0.503981	FALSE
GTF2I	3		1		0.133896		1		0.0805257		1		0.0788453		1		0.731937		0.394419	0.311586	0.196996	0	FALSE
GTPBP4	2		1		0.261093		1		0.258347		1		0.0439093		1		1.59459e-16		0.996468	0.00353232	1.51889e-31	0	FALSE
GUK1	4		1		0.13142		1		2.05995		4.19638e-10	0.36173	0.392241	0.86	1		0.265726		0.659139	0.178115	0.0649592	0	FALSE
GZMA	2		1		0.0328173		0.000530278	0.372222	2.60681	0.85	1		0.0755919		0.301153	0.678082	0.122539	0.7	0.916968	0.0499732	0.0264527	0.359006	FALSE
H2AZ2	2		1		0.220487		1		0.78635		1		0.114186		1		0.078418		0.706736	0.160357	0.0770438	0	FALSE
H3-3B	4		1		0.0238998		1		0.000635913		1		0.00193758		1		0.0232342		0.485533	0.428671	0.0749386	0	FALSE
HAGH	3		1		0.0344623		1		0.0281383		1		2.31738e-17		1		1.25707e-18		1	5.35277e-31	1.8063e-35	6.93889e-18	FALSE
HAMP	2		1		0.079719		1		0.0784246		1		0.0144297		1		6.85694e-17		0.959449	0.0405512	7.50461e-31	0	FALSE
HBB	3		1		0.0346919		1		0.628014		1		0.000122541		1		0.000181634		0.11925	0.082985	0.0640111	0.0233697	FALSE
HBEGF	3		0.188967		0.171702		2.37915e-05	0.672713	0.834559	0.31	1		0.0787039		0.751668		0.34227		0.636653	0.287988	0.0611736	0.264063	FALSE
HCST	3		0.341505		0.175789		1		2.15439		0.126486	0.47057	0.264014	0.81	1		0.0944421		0.880348	0.0902225	0.0264152	0.238995	FALSE
HDLBP	2		1		0.271708		1		0.0370324		1		0.033209		1		0.254244		0.660108	0.307204	0.0326885	0	FALSE
HEBP2	3		1		0.277046		1		0.0666162		1		0.237051		1		2.22448e-17		0.774089	0.225911	4.63058e-32	0	FALSE
HELLS	2		0.54508		0.263654		6.05652e-08	0.0962874	2.04955	0.97	1		0.371677		1		0.349479		0.602072	0.279468	0.084758	0	FALSE
HEXA	4		1		0.16271		1		1.74562		1		0.0760222		1		0.000366513		0.911677	0.0659583	0.0137405	0.137132	FALSE
HEXB	4		0.781206		0.220077		1		0.777984		1		1.67057		2.30421e-09	0	0.299678	1	0.629125	0.301282	0.0325122	0.000826264	FALSE
HIKESHI	4		0.262852		0.261807		1		2.31838		1		0.119327		1		0.0174844		0.90404	0.0574945	0.0184803	0.357446	FALSE
HINT1	4		0.294894		0.0904483		1		3.63351		1		0.0397173		1		0.0120228		0.975097	0.0127551	0.00498793	0.0235506	FALSE
HINT2	4		1		0.0342264		1		2.32603		1		0.0474111		1		0.0516925		0.879081	0.0805237	0.0320197	0	FALSE
HMGB1	4		1		0.0237878		1		0.00136879		1		0.00162602		1		0.00170291		0.989033	0.00968337	0.000946183	3.46945e-18	FALSE
HMGB3	2		1		0.160293		1		0.0424474		1		0.174302		1		0.0121888		0.641732	0.303361	0.0549067	0.765749	FALSE
HMGN2	3		1		0.056309		1		0.0558358		1		0.00736913		1		8.26509e-17		0.991747	0.00825281	1.54299e-30	0	FALSE
HMGN3	4		1		0.0723767		0.000413406	0.0962874	1.43473	0.97	0.875386		0.41692		0.528935		0.322206		0.759357	0.156388	0.0842542	0.105662	FALSE
HMMR	2		1		0.306848		1		0.00579763		1		0.0857684		1		0.292848		0.92207	0.0477681	0.0295685	0	FALSE
HNRNPA1	4		0.234897		0.163853		0	0	1.68764	1	0	0	1.25674	1	0	0	0.346468	1	0.489379	0.314241	0.0809593	0.0436496	FALSE
HNRNPAB	3		1		0.173286		0.00198017	0	0.594516	1	0	0.102429	1.80239	0.97	0.456494		0.0962118		0.564669	0.392396	0.0257557	2.77556e-17	FALSE
HNRNPH3	4		0.262852		0.530129		0.451521		0.265322		0.235288	0.102429	0.597386	0.97	1		0.378996		0.372271	0.276157	0.240658	0.403731	FALSE
HNRNPK	4		1		0.21395		1		0.211106		1		0.0276297		1		0.102528		0.46563	0.215342	0.149637	0	FALSE
HNRNPM	2		1		0.188079		1		0.00658789		1		0.185264		1		0.108528		0.592493	0.361909	0.0423681	0.00215875	FALSE
HNRNPR	4		1		0.102685		0.135165	0.517983	1.63083	0.77	1		0.301529		1		0.239027		0.407422	0.177199	0.164034	0.0352603	FALSE
HNRNPUL2-BSCL2	2		1		0.0748718		1		2.38639		1		0.0885881		1		0.0250185		0.971013	0.0209777	0.00800965	0.0487549	FALSE
HNRNPU	4		1		0.149652		1		1.21554		0.548353		0.498664		1		0.005061		0.626526	0.261944	0.0717968	0.164228	FALSE
HPGD	4		0.557071		0.132271		0.483207		2.12378		0	0	1.05661	1	1		0.0603753		0.684605	0.12314	0.117142	0.075839	FALSE
HSBP1	4		1		0.022911		1		0.0246156		1		0.00368091		1		2.12563e-17		0.850808	0.149192	1.46306e-30	0	FALSE
HSDL2	2		1		0.489048		1		0.384552		1		0.260902		1		0.152782		0.528722	0.242965	0.198163	1.91138	FALSE
HSPA8	3		1		0.152884		1		0.152466		1		0.0144889		1		5.16945e-17		0.920607	0.0793933	7.69411e-32	2.77556e-17	FALSE
HSPA9	3		1		0.0593391		1		0.0474178		1		0.00630321		1		0.0270172		0.784754	0.212991	0.00225484	0	FALSE
HSPB11	4		0.962108		0.122883		1		2.081		1		0.295385		1		0.221301		0.814025	0.101376	0.074756	0.141565	FALSE
HSPD1	4		0.272116		0.0311526		0	0	2.66886	1	1		0.249252		1		0.138733		0.818228	0.0545526	0.0304032	0.0189435	FALSE
HYI	4		0.190437		0.554424		0.396736		1.92302		0.103357	0.846018	0.29531	0.6	0.157572	0.105319	0.401623	0.97	0.813653	0.0944193	0.060199	0	FALSE
HYPK	4		1		0.0244626		1		2.10504		1		0.0111906		1		0.0144602		0.942246	0.043309	0.0080151	0.00215299	FALSE
ID2	4		1		0.0220604		1		1.90578		1		0.0298337		1		0.00321967		0.9545	0.0262144	0.0142958	0	FALSE
IDH3B	3		1		0.376234		1		0.459128		1		0.188719		1		0.0637226		0.885724	0.0941709	0.0201047	0	FALSE
IDH3G	4		1		0.0779709		1		1.46296		1		0.211251		1		0.0230755		0.596488	0.315432	0.0654123	0	FALSE
IER3IP1	3		1		0.1303		1		0.131298		1		0.00951773		1		3.93027e-17		0.982295	0.0177051	1.11401e-31	0	FALSE
IFI30	4		0.918329		0.179469		1		1.80037		1		0.0284529		0.382816	0.835714	0.880321	0.61	0.47218	0.106795	0.0947419	0.186259	FALSE
IFITM3	4		1		0.00503213		1		0.00384959		1		0.00451485		1		0.00495512		0.456662	0.118268	0.0671243	0	FALSE
IFNGR1	2		1		0.122843		1		1.77357		1		0.0735683		1		0.024288		0.865954	0.100158	0.0338882	0.114812	FALSE
IFT27	2		1		0.221182		1		0.185551		1		0.17997		1		0.0435853		0.697038	0.284131	0.0188306	2.77556e-17	FALSE
IFT57	3		0.394386		0.142166		1		1.55966		1		0.629636		1		0.408886		0.561347	0.140383	0.129841	0	FALSE
IGF1	2		1		0.0726719		1		0.0339164		1		0.0403427		1		0.0983907		0.686024	0.194283	0.0523217	0	FALSE
IGFBP6	4		0.641994		0.0228239		1		1.39635		0	0.874638	2.29317	0.43	1		0.17484		0.669784	0.150868	0.0406336	0	FALSE
IGFBP7	4		1		0.0436651		0	0	2.29442	1	0.00432588	0	1.15126	1	0	0	0.636431	1	0.547657	0.130254	0.0529505	0.00389632	FALSE
IL1B	2		0.562749		0.183541		1		0.19705		0.00147299	0.154194	1.77125	0.95	6.83594e-07	0.429268	0.568085	0.84	0.652183	0.29673	0.0431032	0.169201	FALSE
IL1R2	2		0.967051		0.0401192		1		2.44513		0.00609267	0.128322	0.337539	0.96	1		0.155125		0.77731	0.101899	0.0486335	0	FALSE
IL1RL1	3		1		0.155351		0.704405		2.357		1		0.265039		0.16646	0.669231	0.528154	0.71	0.696321	0.133094	0.0970037	0.268689	FALSE
IL6ST	4		1		0.103457		7.58655e-08	0	1.77504	1	1		0.39504		0.225116	0	0.41914	1	0.398519	0.115931	0.0995484	0.0218875	FALSE
IL7R	4		1		0.276031		0.000160798	0.353962	2.76729	0.86	1		0.138682		0.107658	0.039759	0.168031	0.99	0.803464	0.111963	0.0487105	0.168333	FALSE
ILF3	3		1		0.207582		1		0.417637		1		0.818796		1		0.389376		0.480718	0.304104	0.0914077	0	FALSE
IMPDH2	4		1		0.209452		1		0.00548126		1		0.0196772		1		0.00467729		0.753237	0.112188	0.0993184	0	FALSE
IQGAP2	2		0.759687		0.295852		1		0.514678		0.120821	0.102429	0.594324	0.97	1		0.176898		0.608368	0.124478	0.0967906	0	FALSE
IRF2	3		1		0.0527925		0	0.0674214	1.76005	0.98	1		0.0288964		1		0.0887249		0.546825	0.363699	0.0407845	0	FALSE
ISCU	2		1		0.124006		1		1.13204		1		0.942592		1		0.0507835		0.634121	0.290712	0.075166	0.299278	FALSE
ISG20	4		1		0.177197		9.51433e-05	0.19644	3.05908	0.93	1		0.0569343		1		0.00970505		0.660118	0.225277	0.0317722	1.38778e-17	FALSE
ITLN1	3		1		0.00267227		1		2.96533		1		0.760025		1		0.0754558		0.761671	0.146305	0.0789669	0.00326938	FALSE
ITSN2	2		0.629459		0.223146		1		1.86028		1		0.119145		1		0.136986		0.69783	0.102227	0.0832693	0.0116312	FALSE
JAK1	4		1		0.224443		1		0.199945		1		0.00136178		1		0.0146093		0.59685	0.176108	0.124781	0	FALSE
JMJD1C	4		1		0.22369		1		1.1971		1		1.01807		1		0.149095		0.419053	0.250483	0.0759318	0.0815949	FALSE
JPT1	3		1		0.0118966		1		2.80345		1		0.112615		1		0.000878834		0.781085	0.109859	0.0831251	0.0730859	FALSE
JTB	4		1		0.220479		1		0.174067		1		0.103015		1		0.0274793		0.908482	0.0638594	0.0276585	0	FALSE
KATNBL1	2		0.868661		0.237876		1		1.43017		1		0.730017		1		0.0788077		0.550611	0.326833	0.0767771	0	FALSE
KDELR1	4		1		0.186816		1		0.0288052		1		0.019933		1		0.0587489		0.95616	0.0278793	0.0122029	0	FALSE
KIF22	3		0.985704		0.100524		1		1.52243		1		0.350176		1		0.0737438		0.80325	0.112467	0.0809147	0	FALSE
KIF2A	4		0.360355		0.126099		0.08331	0	2.29166	1	0.00085537	0.345222	0.503784	0.87	2.72261e-13	0	0.419102	1	0.740632	0.122234	0.0528234	0.0386499	FALSE
KIF5B	4		1		0.181085		1		0.0458512		1		0.0177029		1		0.00263417		0.428675	0.241416	0.109321	0	FALSE
KIN	4		1		0.202811		1		0.695773		1		1.25851		1		0.138826		0.520806	0.320942	0.0769623	0.0224446	FALSE
KLRB1	4		1		0.196886		1		0.277841		1		0.862001		1		0.018111		0.861678	0.111764	0.0230485	0.112554	FALSE
KMT2E	4		0.332334		0.0900841		0.000179754	0.333397	2.13272	0.87	1		0.0717809		0.00275609	0.691216	0.175822	0.69	0.548617	0.128345	0.0882963	0.0715613	FALSE
KRR1	4		1		0.133595		1		1.21186		1		0.201287		1		0.174918		0.53637	0.253579	0.197906	0	FALSE
KRT14	2		0.778649		0.120085		2.24667e-13	0	3.12631	1	1		0.00341503		0.000106459	0	0.483131	1	0.337147	0.124823	0.0713195	0.0919375	FALSE
KRT18	4		1		0.0192292		1		0.00046275		1		0.000367514		1		0.000589669		0.430475	0.19763	0.160242	0	FALSE
KRT19	3		1		0.0470886		9.83304e-08	0.503932	3.4981	0.78	0.583394		0.213811		0.64709		0.227489		0.462697	0.0931813	0.0699742	0.0118038	FALSE
KRT7	2		1		0.0474568		1		0.302382		1		0.0111956		1		0.0580375		0.426338	0.253533	0.0716224	0.00597512	FALSE
KRTCAP2	4		0.816901		0.0154158		1		2.34444		1		0.776104		1		0.0303996		0.748686	0.213303	0.0224548	0.0144903	FALSE
KTN1	4		0.212648		0.109436		6.25391e-07	0	1.44915	1	1		0.0577484		1		0.0546888		0.366592	0.12387	0.094841	0	FALSE
LAMTOR2	4		1		0.0833368		1		1.45455		1		0.0611014		1		0.079181		0.785347	0.116759	0.0946797	0	FALSE
LAMTOR4	3		1		0.0471121		1		0.157983		1		0.0992369		1		0.0219211		0.606474	0.27209	0.121436	6.93889e-18	FALSE
LARP7	4		1		0.28903		1		0.12147		1		0.0757854		1		0.493609		0.481314	0.380721	0.0771324	0.142227	FALSE
LARS1	4		1		0.148337		0.0611258	0.0674214	1.07629	0.98	4.52252e-09	0.83973	0.733581	0.61	1		0.145167		0.524799	0.188446	0.14086	0.0122579	FALSE
LCMT1	2		1		0.233413		1		0.0397969		1		0.209562		1		0.166563		0.563756	0.426443	0.00960102	2.77556e-17	FALSE
LCN2	3		0.659095		0.110704		1		0.457912		1		0.00421512		1		0.174886		0.573815	0.134208	0.0935999	0	FALSE
LCN6	2		0.781206		0.0999414		0.0197484	0.19644	2.38957	0.93	1		0.0464468		1		0.498389		0.639378	0.177539	0.105681	0.0794845	FALSE
LDB2	2		1		0.282513		1		0.222166		1		0.402083		1		0.184607		0.347012	0.134175	0.107894	1.35062	FALSE
LGALS1	4		1		0.0518939		1		3.20266		2.805e-12	0	0.602956	1	1		0.00210759		0.897078	0.0762649	0.020959	0.00175708	FALSE
LIMA1	2		1		0.11917		1		0.0456578		5.26552e-05	0.846018	0.731097	0.6	1		0.160015		0.45958	0.298617	0.19299	0	FALSE
LPIN2	2		1		0.262466		1		0.0169701		1		0.069637		1		0.200109		0.60385	0.307122	0.0785332	0	FALSE
LSM3	2		1		0.0464259		1		0.0462282		1		0.00465151		1		3.50247e-18		0.855145	0.144855	2.47259e-32	0	FALSE
LSM7	4		1		0.0430238		1		1.81294		1		0.0785331		1		0.0995113		0.693804	0.177732	0.10606	0	FALSE
LSM8	4		1		0.0790135		1		1.66041		1		0.105459		1		0.0056885		0.911214	0.0677725	0.0210135	0.0489085	FALSE
LUZP6	4		1		0.0507488		1		0.363016		1		1.29132		1		0.00132628		0.817851	0.150381	0.0161936	0.049621	FALSE
LXN	2		1		0.170153		1		0.111948		1		0.00345851		1		0.131454		0.591419	0.351875	0.0553905	0	FALSE
LY75-CD302	3		0.31879		0.0770545		0	0.393394	2.63383	0.84	0	0.720274	0.787679	0.67	1		0.0874021		0.720702	0.160681	0.0514839	0.15423	FALSE
LY96	4		1		0.0550579		1		2.29371		2.01479e-05	0.487755	0.67762	0.8	0.193119	0.630882	0.284824	0.74	0.613698	0.23734	0.0672658	0.062297	FALSE
LYAR	4		1		0.192827		1		0.0682968		0.120305	0	0.271898	1	1		0.133665		0.773166	0.0683549	0.0628341	0	FALSE
LYZ	3		1		0.0634031		0.000104921	0	2.16656	1	0.328356		0.455005		1		0.363883		0.254758	0.0897042	0.0740279	0.0285848	FALSE
LZIC	3		1		0.250767		1		0.140754		1		0.0635027		1		0.731165		0.401837	0.196185	0.140761	0	FALSE
MAGOH	4		1		0.465744		1		0.502764		1		0.700777		1		0.100936		0.806916	0.16108	0.0154913	0	FALSE
MALSU1	4		1		0.14045		1		0.174252		1		0.11244		1		0.0812873		0.603024	0.177607	0.161515	0.01597	FALSE
MAOA	2		1		0.256147		1		0.237976		0.777467		0.592743		1		0.115737		0.687994	0.139933	0.0721931	0	FALSE
MAP1LC3B	4		1		0.191424		1		0.135375		1		0.185398		1		0.0475992		0.697225	0.266202	0.0365732	0	FALSE
MARCO	2		1		0.00968909		1		3.04488		1		0.308231		1		0.756161		0.667298	0.101343	0.0971167	0.146309	FALSE
MCL1	2		1		0.457849		1		0.460517		1		0.0424739		1		8.51898e-18		0.907627	0.0923734	1.72161e-33	0	FALSE
MCTS1	4		1		0.121069		1		0.0729325		1		0.029607		1		0.00771575		0.855058	0.0740207	0.0530848	2.77556e-17	FALSE
MCUB	3		0.868661		0.180245		1		1.09152		1		0.279656		1		0.091195		0.418978	0.232588	0.15199	0.0651939	FALSE
MCUR1	4		1		0.264623		1		0.190329		1		0.155533		1		0.964068		0.62664	0.149037	0.10011	0.0130197	FALSE
MDH1	2		1		0.301511		1		0.203654		1		0.0493859		1		3.1211e-17		0.981152	0.0188481	1.90944e-33	0	FALSE
MDH2	2		1		0.109215		1		0.0117737		1		0.103444		1		0.00204976		0.985748	0.0124055	0.00184663	0	FALSE
MDM2	2		0.434835		0.409023		0.00103096	0.0962874	1.98002	0.97	0.0500414	0.609216	0.816966	0.74	0.000331155	0.385	0.379499	0.86	0.678093	0.148634	0.099007	0.279245	FALSE
MED4	3		0.317404		0.416548		0.158746	0.48309	1.29062	0.79	1		0.27082		1		0.122324		0.474903	0.304026	0.131244	0	FALSE
MESD	2		1		0.102498		1		0.105251		1		0.00367242		1		5.55657e-17		0.999588	0.000411534	2.26254e-31	0	FALSE
METTL5	4		1		0.136827		1		1.95757		1		0.178353		1		0.0257619		0.604072	0.179096	0.0590764	0.0492834	FALSE
MFAP5	3		1		0.0911478		0.0156431	0.148889	2.01323	0.95	0.00953428	0.0401681	0.784544	0.99	1		0.523055		0.504018	0.127194	0.0635001	0.383478	FALSE
MFSD1	2		1		0.0241968		1		1.36953		1		0.904774		1		0.212902		0.454919	0.230511	0.0987361	0.334251	FALSE
MGP	4		1		0.03423		1		2.77046		1		0.0811338		1		0.0357592		0.70087	0.0541731	0.0286045	0.0166257	FALSE
MGST3	4		1		0.076526		1		0.409796		1		0.173201		1		0.0642907		0.550137	0.178112	0.0846993	0	FALSE
MIER1	3		1		0.606092		1		0.0666511		1		0.343281		1		0.308264		0.554481	0.265912	0.111245	0	FALSE
MIR4435-2HG	2		1		0.206049		1		0.00328649		1		0.0422502		1		0.166392		0.448013	0.381965	0.126914	0	FALSE
MLEC	3		1		0.474273		1		0.0503823		1		0.537638		1		0.164293		0.887434	0.0730003	0.0233979	0	FALSE
MMP7	2		1		0.283609		1		0.29511		1		0.029847		1		1.03053e-17		0.978426	0.0215736	3.78427e-33	0	FALSE
MNAT1	2		1		0.428448		1		0.0196324		1		0.220124		1		0.404529		0.513958	0.201659	0.165033	0	FALSE
MORF4L1	4		0.425214		0.128274		0	0.0674214	2.17136	0.98	0	0.102429	1.0848	0.97	1		0.0915404		0.734839	0.161812	0.0503869	0.0357628	FALSE
MPC2	4		1		0.157777		1		0.163611		1		0.00488459		1		0.00135358		0.680286	0.287345	0.0323691	0	FALSE
MRPL11	2		1		0.18097		1		0.0173696		1		0.179003		1		0.04861		0.707755	0.246834	0.0454106	0	FALSE
MRPL13	2		1		0.212544		1		0.165666		1		0.077464		1		0.0339547		0.57352	0.376656	0.0470412	0	FALSE
MRPL20	3		1		0.0302454		1		0.941506		1		0.0281381		1		0.0256154		0.654508	0.201577	0.143914	0	FALSE
MRPL21	4		0.680508		0.0684872		1		1.8812		1		0.297761		1		0.148652		0.599021	0.275768	0.0801064	0.0766725	FALSE
MRPL37	2		1		0.0542326		1		0.0469668		1		0		1		1.09624e-18		1	5.71833e-34	1.16526e-68	2.08167e-17	FALSE
MRPL39	2		1		0.13214		1		0.0910301		1		0.13098		1		0.0224787		0.770021	0.204698	0.0252807	0	FALSE
MRPL47	4		1		0.246602		1		0.0138388		1		0.21667		1		0.0665841		0.483233	0.269433	0.111613	2.77556e-17	FALSE
MRPL51	4		1		0.0654696		1		2.63811		1		0.0303791		1		0.0263762		0.986536	0.0107993	0.00266511	0	FALSE
MRPL52	4		1		0.102566		1		1.97885		1		0.499923		1		0.0897169		0.570262	0.269763	0.050478	0	FALSE
MRPL53	3		1		0.200324		1		0.203558		1		0.00507984		1		2.34469e-17		0.869637	0.130363	9.61259e-33	0	FALSE
MRPL55	3		0.392159		0.273096		0	0.122514	3.17948	0.96	1		0.0522179		1		0.0881179		0.860133	0.0561616	0.0429974	0.274265	FALSE
MRPS10	2		1		0.194871		1		0.159715		1		0.0545164		1		7.66713e-17		0.962667	0.0373329	8.61136e-32	0	FALSE
MRPS15	2		1		0.17586		1		0.311931		1		0.280439		1		0.47741		0.671253	0.175072	0.153315	0	FALSE
MRPS16	2		1		0.0646846		1		0.042022		1		0.0445375		1		0.00736824		0.427143	0.352577	0.22028	0	FALSE
MRPS18C	4		1		0.139934		1		1.96216		1		0.0777991		1		0.10231		0.663581	0.243255	0.0506479	0.000744854	FALSE
MRPS21	4		1		0.0668419		8.05014e-06	0.244873	2.25302	0.91	1		0.0998061		1		0.0772154		0.83803	0.117299	0.033121	0.0457052	FALSE
MRPS31	2		1		0.063096		8.87156e-13	0.0367123	1.64074	0.99	0	0	0.934764	1	1		0.109009		0.502415	0.275156	0.112181	0	FALSE
MS4A4A	2		1		0.259085		1		1.30072		1		0.233244		1		0.635096		0.467242	0.290908	0.129249	0.0607171	FALSE
MS4A6A	2		1		0.0452497		1		0.442521		1		0.174996		1		1.35968		0.589953	0.194677	0.159099	0.0471661	FALSE
MS4A7	2		1		0.0454063		0.942147		0.381326		1		0.107123		1		0.086752		0.312262	0.224811	0.137243	0.0979314	FALSE
MSN	4		1		0.0479103		1		0.0915623		1		0.00209235		1		0.00193313		0.419753	0.169662	0.158546	0	FALSE
MSRB2	3		0.41804		0.164594		1		1.75257		1		0.102667		1		0.0672111		0.772931	0.210077	0.0169917	0	FALSE
MT1E	4		1		0.0896056		1		1.96138		1		0.0778428		1		0.00787201		0.940067	0.0516954	0.00722562	0.00212647	FALSE
MT1F	3		1		0.0789834		1		0.136769		1		0.122569		1		6.9195e-17		0.669643	0.330357	1.92858e-31	0	FALSE
MT1G	3		0.198393		0.259564		0.250145	0.0367123	0.262334	0.99	0.404042		0.0855491		1		3.16208e-17		0.757526	0.242474	1.09095e-31	0.222299	FALSE
MT1M	4		1		0.0139562		1		0.00262689		1		0.0179514		1		0.0022486		0.973555	0.0183228	0.00812221	0	FALSE
MT2A	4		0.304986		0.0138605		1		0.816754		1		1.67776		1		0.01479		0.461659	0.397676	0.0423382	0.000428527	FALSE
MTCH2	4		1		0.219994		0.00108532	0.244873	1.1943	0.91	0.0937812	0.641759	0.98781	0.71	1		0.11133		0.673899	0.188066	0.0370282	0.010249	FALSE
MTDH	4		1		0.0602974		1		1.99994		0.000234056	0.855808	0.172984	0.59	1		0.207838		0.605849	0.136669	0.0875999	0.0164766	FALSE
MTIF3	3		0.515982		0.134015		1.64792e-07	0.0674214	2.14403	0.98	0.982226		0.361389		0.00399706	0.168367	0.516986	0.95	0.584796	0.179761	0.0880186	0.0440939	FALSE
MTSS1	3		1		0.0647122		1		2.38423		1		0.138982		1		0.0243707		0.886863	0.0648304	0.0291147	0.0165957	FALSE
MTUS1	3		1		0.102993		0	0.406786	2.03737	0.83	1		0.0352273		1		0.348629		0.542507	0.243099	0.0985357	0.143512	FALSE
MVP	2		1		0.0313882		1		0.0256284		1		1.98615e-18		1		3.32463e-19		1	1.30069e-33	2.57855e-36	0	FALSE
MYL5	3		1		0.109764		1		0.0896221		1		6.94642e-18		1		7.49465e-18		1	1.39494e-33	2.47733e-36	0	FALSE
MYL6B	3		1		0.0338748		1		2.36779		1		0.0653334		1		0.0695478		0.954229	0.0298709	0.0159003	0.394612	FALSE
MZT2B	4		1		0.337266		1		0.020102		1		0.327108		1		0.0789754		0.976279	0.0185718	0.00323579	0	FALSE
NACA	4		0.30559		0.173836		1		0.0679488		1		0.0689486		1		0.0340622		0.80317	0.126882	0.0154353	0.000483678	FALSE
NAE1	2		1		0.0869347		1		1.72744		1		0.0740578		1		0.101456		0.486648	0.394235	0.0926927	0.370706	FALSE
NAMPT	4		1		0.0969233		1		0.107788		1		0.20665		1		0.0697245		0.885259	0.0333094	0.0297916	0	FALSE
NANS	4		1		0.0855193		1		0.00571526		1		0.0166556		1		0.00997169		0.96645	0.0196536	0.00937472	0	FALSE
NAPSA	2		0.538593		0.199315		1		0.0300333		1		0.00559973		1		0.0266929		0.366426	0.228039	0.0841869	0.358274	FALSE
NAXE	2		1		0.0322799		1		0.0984041		1		0.101174		1		6.51592e-18		0.871559	0.128441	1.32395e-32	6.93889e-18	FALSE
NBDY	4		1		0.0263913		1		2.05873		1		0.0411363		1		0.0196356		0.949349	0.0425724	0.00807837	0	FALSE
NCL	4		0.436332		0.105783		0	0.0367123	2.3221	0.99	1		0.0235771		0.599225		0.481543		0.571114	0.279403	0.0785642	0.101609	FALSE
NDFIP1	4		1		0.226546		1		0.435764		1		0.271889		1		0.698291		0.443262	0.248295	0.130276	0	FALSE
NDUFA11	4		0.496016		0.0142298		0	0	3.26312	1	0	0	1.27019	1	0	0.192233	0.0528782	0.94	0.84728	0.144998	0.00581062	0.0146908	FALSE
NDUFA12	4		1		0.0587911		1		2.41462		1		0.0658852		1		0.00326709		0.941063	0.0440495	0.00983469	0	FALSE
NDUFA1	4		1		0.0513881		1		1.98822		1		0.00362527		1		0.00109769		0.990654	0.00736267	0.00189489	0	FALSE
NDUFA2	4		1		0.0805851		1		1.02986		1		0.014919		1		4.51482e-16		0.874567	0.125433	8.65105e-31	0	FALSE
NDUFA7	4		1		0.0567023		1		2.72904		1		0.152561		1		0.0166741		0.89268	0.0586762	0.0280889	0.0540249	FALSE
NDUFAB1	4		1		0.0590123		1		0.811952		1		1.18586		1		0.0539097		0.579068	0.223668	0.157806	0.0186222	FALSE
NDUFAF3	4		1		0.0463399		1		1.39637		1		0.121447		1		1.91384e-15		0.969929	0.0300708	1.7531e-30	0.0578404	FALSE
NDUFAF6	2		1		0.387778		1		0.0377072		1		0.187346		1		0.286868		0.533089	0.17409	0.120882	1.11022e-16	FALSE
NDUFB10	4		1		0.0878712		1		1.36814		1		0.0339381		1		0.109632		0.655571	0.163519	0.088119	0.00795269	FALSE
NDUFB1	4		1		0.070596		1		2.03857		1		0.124922		1		0.0358356		0.890388	0.0557633	0.0372478	5.55112e-17	FALSE
NDUFB3	2		1		0.299897		1		0.296947		1		0.0483368		1		6.77297e-17		0.708808	0.291192	1.5174e-32	0	FALSE
NDUFB4	4		1		0.000945799		1		0.0109408		1		0.0234888		1		0.0280486		0.425023	0.305364	0.14564	0	FALSE
NDUFB6	4		1		0.325936		1		0.446663		1		0.0320276		1		0.109581		0.519007	0.389646	0.0726608	5.55112e-17	FALSE
NDUFB7	4		1		0.0146485		1		2.04693		1		0.0601177		1		0.0281408		0.863166	0.0781761	0.0498148	0.0160606	FALSE
NDUFB9	4		1		0.00457754		1		2.28216		1		0.00894268		1		0.000862574		0.990286	0.00495224	0.00394071	0	FALSE
NDUFC1	4		0.426309		0.0384856		1		2.75312		1		0.134139		1		0.00916229		0.86894	0.0735263	0.0249928	0.0343857	FALSE
NDUFC2	4		1		0.0545706		1		0.0498159		1		2.89797e-05		1		1.45013e-16		0.997167	0.00283343	8.88649e-30	0	FALSE
NDUFS2	4		1		0.0249591		1		0.000425739		1		0.0016881		1		0.00166283		0.495059	0.264569	0.157104	0	FALSE
NDUFS3	4		1		0.102532		1		1.71695		1		0.152443		1		0.0567762		0.865826	0.0812434	0.0475387	0.0420537	FALSE
NDUFS4	4		1		0.226383		1		0.810753		1		1.40728		1		0.020999		0.756908	0.222432	0.00893888	0	FALSE
NDUFS5	4		1		0.00304962		1		0.0616283		1		0.117773		1		0.0652649		0.979811	0.00942044	0.00526434	0	FALSE
NDUFS6	4		1		0.0840651		1		1.63036		1		0.0677234		1		0.0131333		0.546035	0.42176	0.0225402	0	FALSE
NDUFS7	4		0.361227		0.12451		1		1.33293		1		0.00286694		1		8.06388e-05		0.988351	0.0106027	0.00104588	0	FALSE
NDUFS8	4		1		0.120189		1		0.41175		1		1.40858		1		0.00215196		0.540907	0.440761	0.0128151	0.0161943	FALSE
NDUFV1	4		1		0.122623		1		0.123447		1		0.0206638		1		6.24983e-17		0.968424	0.0315755	1.07943e-30	1.38778e-17	FALSE
NDUFV2	4		1		0.00909382		1		2.24542		1		0.0478832		1		0.104895		0.93283	0.0213828	0.0159509	0	FALSE
NDUFV3	2		0.999084		0.159376		1		1.98712		0.880456		0.510756		1		0.0929394		0.85773	0.119695	0.0225748	0	FALSE
NEDD8-MDP1	4		1		0.308195		1		0.082958		1		0.384215		1		0.156543		0.883645	0.0738428	0.0235883	0.000144156	FALSE
NEDD8	3		1		0.106752		1		0.0233484		1		0.0946125		1		9.53764e-18		0.88598	0.11402	1.17809e-33	0	FALSE
NEMF	4		1		0.178032		0.00395896	0.0674214	2.22218	0.98	0.525944		0.382017		1		0.132027		0.609675	0.124843	0.0563361	0.13239	FALSE
NEXN	2		0.304446		0.170535		3.88694e-05	0	2.46876	1	0.00033321	0	0.546264	1	1		0.0197437		0.529281	0.134176	0.0844149	0.199073	FALSE
NFIB	2		0.931194		0.256394		0.426409		0.390214		0.357218		0.865266		1		0.313894		0.454344	0.240085	0.14683	0	FALSE
NFIC	4		0.504511		0.33738		0.203927	0.265347	0.704999	0.9	0.283261		0.598516		0.00921798	0.039759	0.614677	0.99	0.449884	0.326348	0.201299	0.499061	FALSE
NFIX	2		1		0.14448		0.00510683	0.290443	1.40951	0.89	1		0.206218		1		0.39786		0.642012	0.178787	0.154904	0	FALSE
NFKB1	3		0.818205		0.326211		1		2.00739		1		0.564974		1		0.261452		0.633559	0.201352	0.0548367	0.0854701	FALSE
NFU1	3		1		0.086286		1		1.31949		1		0.643999		1		0.0367088		0.520915	0.283656	0.0988584	0.144616	FALSE
NIFK	4		1		0.137441		6.59234e-06	0.926917	1.61999	0.54	0.0963464	0.0401681	0.18838	0.99	1		0.107236		0.664182	0.147725	0.0771525	1.38778e-17	FALSE
NIT2	3		1		0.115142		1		0.035215		1		0.104372		1		0.0195588		0.901743	0.078588	0.0196691	0	FALSE
NKAP	4		1		0.134254		1		0.13258		1		0.0212627		1		3.58664e-18		0.984895	0.0151046	2.90882e-31	0	FALSE
NKG7	2		1		0.106247		1		0.784938		1		1.65422		1		0.0459297		0.584261	0.306375	0.0893592	0.0182229	FALSE
NME1-NME2	3		1		0.0782237		1		0.0105361		1		0.0695946		1		0.0199917		0.984065	0.0103402	0.00559494	0	FALSE
NME2	4		0.996379		0.0835923		1		2.02076		0.982226		0.0338368		1		0.0758874		0.812621	0.039066	0.0307675	0.0119075	FALSE
NOP56	2		1		0.113228		1		0.112113		1		0.0294041		1		8.17858e-17		0.99689	0.00311037	9.22744e-32	0	FALSE
NOP58	3		1		0.073646		1		1.44184		1		0.789602		1		0.283952		0.548868	0.202179	0.181457	0.360975	FALSE
NOSIP	4		1		0.165009		1		0.906197		1		2.32868		1		0.0183685		0.608944	0.383879	0.00518556	0.085676	FALSE
NPC2	4		1		0.219702		1		0.0453687		1		0.0224732		1		0.115747		0.61689	0.349105	0.0161722	0	FALSE
NRDC	2		1		0.228292		1		0.227593		1		0.0226714		1		1.04416e-16		0.995503	0.00449725	1.26291e-31	0	FALSE
NSA2	4		1		0.0539874		1		3.29832		1		0.200018		1		0.135729		0.919473	0.0385799	0.0237426	0	FALSE
NSMCE1	3		1		0.455398		1		0.0827078		1		0.459218		1		0.149975		0.606228	0.371692	0.02208	0.142485	FALSE
NSMCE4A	4		1		0.286131		1		1.3057		0.0650538	1	1.08708	0.5	1		0.0705661		0.517931	0.207337	0.153853	0	FALSE
NSRP1	4		1		0.191721		0.368529		1.69646		1		0.47155		1		0.41586		0.407126	0.212767	0.174609	0	FALSE
NTHL1	4		1		0.217163		1		0.00932666		1		0.182811		1		0.117132		0.510045	0.319235	0.17072	0	FALSE
NUB1	4		0.894017		0.180802		1		2.00266		1		0.402516		1		0.275392		0.700007	0.138833	0.0850506	0.266011	FALSE
NUCB2	4		1		0.121114		0.00471278	0	2.06175	1	0.0116556	0.0401681	0.838506	0.99	1		0.196798		0.494284	0.196217	0.0973578	0.0232138	FALSE
NUDT5	3		1		0.212533		1		1.17088		1		0.405617		1		0.469216		0.473794	0.209842	0.177009	0.2064	FALSE
ODF3B	2		1		0.230981		1		0.230976		1		0.00179109		1		3.27655e-17		0.957519	0.042481	6.11495e-33	1.8502	FALSE
OFD1	2		0.839991		0.111584		1		0.997118		1		0.121653		1		0.645964		0.336391	0.221977	0.154318	0	FALSE
OLR1	2		1		0.252124		1		0.0564578		1		0.349819		1		0.262987		0.584957	0.369825	0.0223161	0	FALSE
OPTN	4		1		0.214851		1		0.564142		3.22492e-07	0	0.909932	1	1		0.0535629		0.484015	0.154021	0.103055	0	FALSE
OS9	2		1		0.283473		1		0.20416		1		0.0464801		1		0.088246		0.608202	0.257339	0.091256	1.03061	FALSE
OSBPL1A	4		1		0.278752		1		0.12659		1		0.206991		1		0.122489		0.425965	0.27746	0.0882288	1.11022e-16	FALSE
OSBPL9	2		0.954964		0.0794105		0.681824		2.20194		1		0.00820349		1		0.218596		0.793694	0.0827775	0.0715911	0	FALSE
OST4	4		1		0.0096545		1		0.0298005		1		0.0212423		1		1.55665e-16		0.815905	0.184095	6.7016e-30	0	FALSE
OSTF1	2		1		0.317559		1		0.317148		1		0.0181594		1		0.020073		0.658077	0.3185	0.0221159	0	FALSE
PA2G4	3		0.674778		0.0828998		1		2.0179		1		0.00221239		1		0.0382516		0.784508	0.181944	0.0335475	0	FALSE
PABPC4	3		1		0.105417		1		1.51492		1		0.0114804		1		0.0975216		0.746517	0.0872423	0.0638733	0	FALSE
PAFAH1B1	3		0.801547		0.318166		0.75578		1.78991		1		0.16311		1		0.181592		0.730371	0.204595	0.0441013	0	FALSE
PAK1IP1	3		1		0.0791666		1		1.13095		1		0.164931		1		0.0628185		0.412684	0.21474	0.113981	0.0597105	FALSE
PALMD	3		0.568393		0.182261		1		1.2735		0.118227	0.874638	1.16626	0.43	1		0.00282558		0.80473	0.159662	0.0189448	0.160934	FALSE
PAPOLA	4		1		0.0598824		1		0.188651		1		0.0328075		1		0.103918		0.348678	0.219059	0.14785	0.0487296	FALSE
PARK7	3		1		0.344422		1		0.0550316		1		0.29155		1		0.0718475		0.745607	0.15758	0.0800468	0.0573359	FALSE
PARP1	3		0.463137		0.0958796		1		1.67682		1		0.00303736		1		0.0131959		0.972661	0.0211386	0.00620068	0	FALSE
PAXX	4		1		0.199097		1		0.146753		1		0.176964		1		8.40238e-17		0.641292	0.358708	2.96585e-32	0	FALSE
PBDC1	2		1		0.286392		1		0.264494		1		0.207702		1		0.0396209		0.744765	0.213809	0.0414258	0	FALSE
PBRM1	2		1		0.282346		1		1.3423		0.0247576	0	0.580466	1	1		0.0920691		0.462799	0.219473	0.135085	0	FALSE
PDCD4	3		0.200317		0.291246		0.533804		1.97585		1		0.0687449		1		0.273288		0.659233	0.160378	0.0887357	0.190161	FALSE
PDCD5	4		1		0.0455573		1		1.37006		1		0.718267		0	0	0.75401	1	0.527009	0.329253	0.0853677	0.00734676	FALSE
PDGFA	2		1		0.347425		1		0.151744		1		0.299117		1		0.139208		0.564983	0.226501	0.158255	0	FALSE
PDIA3	4		0.602517		0.162374		0.000128118	0.943521	1.9824	0.47	1		0.0980037		1		0.152787		0.655347	0.231939	0.0743057	0.240782	FALSE
PDLIM4	2		1		0.365666		1		0.381325		1		0.0484334		1		1.55189e-17		0.942152	0.0578485	2.87687e-32	0.205831	FALSE
PDXK	2		1		0.214838		1		0.0479254		1		0.190174		1		2.80333e-17		0.995238	0.00476185	1.23176e-32	0	FALSE
PET100	3		0.442803		0.314141		1		1.63517		1		0.31592		1		0.0105407		0.729062	0.24558	0.016415	0.26163	FALSE
PEX16	4		1		0.131696		1		1.67631		1		0.0257325		1		0.0425654		0.800789	0.11835	0.0618015	0	FALSE
PFDN2	4		1		0.215432		1		0.0605554		1		0.121877		1		0.13641		0.925079	0.0668012	0.00811976	0	FALSE
PFN1	4		1		0.00590584		0	0	3.88637	1	0.309969		0.0635777		0	0.105319	0.21954	0.97	0.948428	0.0166639	0.00986979	0.00470073	FALSE
PGC	2		1		0.00836711		1		2.72423		1		0.809408		1		0.0268103		0.596393	0.066104	0.0395574	0.0068665	FALSE
PGLS	2		1		0.071247		1		0.0493425		1		0.0403266		1		4.28357e-18		0.952588	0.0474122	4.39438e-34	0.0422707	FALSE
PHF14	2		1		0.0176022		1		0.39085		1		1.68653		1		0.0572873		0.634685	0.352033	0.0132824	0.259752	FALSE
PHF20L1	2		0.869023		0.371319		0.0318294	0	1.73035	1	1		0.13606		1		0.344103		0.488345	0.204495	0.109709	0	FALSE
PHPT1	4		1		0.140136		1		2.08562		1		0.191926		1		0.0262753		0.909194	0.0730949	0.0177111	0	FALSE
PIH1D1	3		1		0.186513		1		0.110997		1		0.0467415		1		0.143556		0.442528	0.344793	0.179502	2.77556e-17	FALSE
PITPNB	4		1		0.107407		1		0.453896		1		0.58294		0.432457		0.231033		0.465457	0.261025	0.158032	0.200519	FALSE
PLA2G2A	2		1		0.0636724		1		0.807297		1		1.00678		1		0.210981		0.606795	0.171671	0.108237	0.366885	FALSE
PLAAT3	4		1		0.0926801		1		0.0301297		1		0.0190809		1		0.136424		0.969992	0.024653	0.00535488	0	FALSE
PLAC8	2		1		0.166113		1		0.546537		1		1.2456		1		0.0583544		0.503256	0.323898	0.133188	0.284461	FALSE
PLAC9	3		1		0.0110825		1		2.02848		1		0.12488		1		0.0409764		0.949481	0.0240527	0.0119006	0.00100419	FALSE
PLEKHA3	4		0.44369		0.261796		0.00319858	0	1.43032	1	1		0.192285		1		0.045927		0.682645	0.293277	0.0182314	0.437527	FALSE
PLEKHA5	2		1		0.0788474		1.80171e-07	0.845231	1.76781	0.41	1		0.00400628		1.30294e-05	0.385	0.615952	0.86	0.502083	0.282558	0.0877721	0	FALSE
PMM2	3		1		0.0939188		1		1.63277		1		0.429236		1		0.042888		0.586293	0.274401	0.0694453	0.0607324	FALSE
PMPCB	4		1		0.127269		1		1.00195		1		0.855397		1		0.0207096		0.520376	0.37621	0.0449213	0.0852565	FALSE
PNISR	4		0.931194		0.149829		1		0.680458		1		1.05279		1		0.0989597		0.48334	0.233129	0.0802188	0	FALSE
PNKP	2		1		0.12806		1		0.0963873		1		0.122064		1		0.0275493		0.559009	0.440022	0.00096871	0	FALSE
PNN	4		0.394386		0.136203		1		1.32819		1		1.08273		2.42249e-05	0	0.267924	1	0.523531	0.228528	0.0768393	0.0236454	FALSE
PNRC1	4		1		0.504171		1		0.195088		1		0.200543		1		0.148944		0.482928	0.113141	0.106406	1.11022e-16	FALSE
PNRC2	3		1		0.218346		1		0.14478		1		0.184328		1		9.82263e-17		0.847298	0.152702	6.42008e-31	2.77556e-17	FALSE
POLD2	3		1		0.272773		1		0.287542		1		0.117747		1		0.0247602		0.445169	0.331958	0.167477	0	FALSE
POLR2F	4		1		0.00242019		0	0.783874	3.08796	0.37	0	0.36173	0.258014	0.14	1		0.027957		0.964024	0.0286643	0.00461944	0	FALSE
POLR2G	3		1		0.0446322		1		0.036442		1		1.34428e-17		1		2.53639e-19		1	1.05585e-31	2.05116e-35	0	FALSE
POLR2J	4		1		0.0300692		1		0.0245514		1		6.22827e-17		1		9.24762e-19		1	6.32337e-30	7.46076e-60	3.46945e-18	FALSE
POLR2L	4		1		0.0619893		1		0.0554449		1		2.04892e-17		1		2.52726e-17		1	2.1818e-31	1.64985e-61	1.38778e-17	FALSE
POLR3GL	4		1		0.188919		1		0.471414		1		0.00569248		1		0.146346		0.77477	0.181594	0.039063	0	FALSE
PPA2	4		1		0.0597362		1		0.00753306		1		0.0111515		1		0.0249584		0.923225	0.0260099	0.0231415	0	FALSE
PPIB	4		1		0.0459597		1		0.00505283		1		0.0072245		1		0.00373775		0.522437	0.201322	0.1376	0	FALSE
PPIG	4		1		0.0221155		1		1.63696		1		0.963538		1		0.38522		0.512204	0.272873	0.079532	0.0289763	FALSE
PPIH	4		1		0.107487		0.488027		1.13212		3.18909e-05	0.947932	1.06906	0.53	1		0.179693		0.76225	0.140839	0.0681272	0	FALSE
PPM1G	4		0.89127		0.185874		1		0.361761		1		0.182934		1		1.18082		0.629517	0.208428	0.124402	0	FALSE
PPP1R14A	4		1		0.0524519		1		2.5518		1		0.018471		1		0.00700227		0.97404	0.0144266	0.00596532	0.00883288	FALSE
PPP1R14B	4		1		0.0511663		1		0.00159568		1		0.00251073		1		0.00292068		0.569466	0.375482	0.0476423	0	FALSE
PPP1R2	2		1		0.122669		1		0.127267		1		0.0717395		1		0.00520569		0.997444	0.00251262	4.3871e-05	0	FALSE
PPP1R7	4		1		0.264167		1		1.19679		1		0.127263		1		0.224495		0.453464	0.225416	0.158872	0.11322	FALSE
PPP2R2A	4		1		0.0806967		1		0.876065		0.00241724	0.855808	0.815723	0.59	1		0.449967		0.602067	0.191655	0.0993311	1.38778e-17	FALSE
PQBP1	4		1		0.397986		1		0.195463		1		1.10279		1		0.0386865		0.563558	0.297862	0.0654211	0.0937733	FALSE
PRC1	2		0.252405		0.578881		1		0.368874		0.136248	0.83973	1.115	0.61	1		0.21232		0.533956	0.349052	0.0732859	0	FALSE
PRDX1	4		0.496016		0.0377339		1		1.20158		1		1.31941		1		0.0397015		0.660878	0.184657	0.0439209	0.0255367	FALSE
PRDX2	3		0.772697		0.157993		1		0.0261584		0.861108		0.16391		1		0.0546431		0.515516	0.466168	0.0183168	0	FALSE
PRDX6	4		1		0.0788375		1		0.0749758		1		0.000408321		1		0.0133945		0.427791	0.302873	0.250384	0	FALSE
PRELID1	4		1		0.0186312		1		0.470218		1		1.04962		1		0.0518024		0.573502	0.387217	0.0224984	3.46945e-18	FALSE
PRG4	2		1		0.0135966		2.27895e-05	0	2.71745	1	0.0149929	0.0735385	0.939175	0.98	0.0472308	0.3	1.33217	0.9	0.44761	0.265688	0.167256	0.592098	FALSE
PRKDC	4		1		0.12706		1		1.62158		1		0.027288		1		0.0886245		0.790291	0.13344	0.0626873	0.109585	FALSE
PRPF40A	4		0.772697		0.260428		1		1.23888		1		0.297598		1		0.125308		0.363419	0.195819	0.129171	0.00691082	FALSE
PRRC2C	4		0.685627		0.0697054		1		0.819971		1		0.205724		0.012164	0.318421	0.417304	0.89	0.424366	0.168546	0.133395	0.101095	FALSE
PRXL2A	2		0.436139		0.746098		1		0.237637		0.886182		0.710507		1		0.058359		0.602935	0.359065	0.0379995	1.66764	FALSE
PSIP1	4		0.276705		0.301175		0	0	2.3114	1	1		0.410665		0.00477511	0.945732	0.244748	0.47	0.593803	0.235613	0.0748114	0	FALSE
PSMA2	4		1		0.0172689		1		0.0163334		1		0.00580849		1		2.95781e-16		0.999988	1.22352e-05	3.40722e-29	0	FALSE
PSMA3	4		1		0.0708906		1		1.5297		1		0.27896		1		0.206051		0.462165	0.228868	0.100211	0.00493119	FALSE
PSMA4	4		1		0.222229		1		0.00468201		1		0.0558637		1		0.220097		0.359864	0.262372	0.208121	0	FALSE
PSMA5	4		0.255361		0.196734		2.93095e-05	0.122514	2.38034	0.96	0	0.102429	0.65105	0.97	1		0.0230258		0.897735	0.075623	0.0136878	0.15348	FALSE
PSMA7	4		0.861784		0.00952689		1		2.93769		1		0.167532		1		0.128685		0.781761	0.122191	0.0497917	0.0118057	FALSE
PSMB10	4		0.868661		0.0621314		1		0.130089		1		1.50838		1		0.00767764		0.556824	0.428729	0.0131946	3.92481e-17	FALSE
PSMB1	4		1		0.033735		1		2.12179		1		0.00183773		1		0.00107514		0.957232	0.0352496	0.00751811	0.044469	FALSE
PSMB2	4		0.635881		0.190741		1		0.824868		1		1.16429		1		0.000253252		0.758939	0.234659	0.00523749	0	FALSE
PSMB4	4		0.310076		0.156856		1		1.34813		1		0.77633		1		0.0200992		0.807723	0.178489	0.0120619	0	FALSE
PSMB6	4		1		0.0367141		1		1.50052		1		0.581451		1		0.0176484		0.646976	0.293879	0.0536176	0.0193587	FALSE
PSMC3	4		1		0.0662207		1		0.77773		1		0.815582		1		0.0977353		0.653695	0.18627	0.0531225	0	FALSE
PSMD12	3		1		0.0496649		1		1.28921		8.14688e-08	0.487755	0.411412	0.8	1.34875e-05	0.764901	0.353134	0.35	0.800977	0.111336	0.0810944	0	FALSE
PSMD8	4		1		0.0613941		1		1.78696		1		0.0250832		1		0.0795114		0.863499	0.069632	0.059813	0.0343109	FALSE
PSME2	4		0.954964		0.0115653		1		2.25671		1		0.111892		1		0.0316964		0.938548	0.0232534	0.0171494	0.0139452	FALSE
PSMG2	4		1		0.111456		1		0.0642152		1		0.0141141		1		0.0478094		0.805268	0.193398	0.00133386	0	FALSE
PSMG4	2		1		0.193789		1		0.191918		1		0.127595		1		0.0281259		0.685964	0.312825	0.00121097	0	FALSE
PSTPIP2	2		0.794933		0.399976		1		1.63638		1		0.0355867		1		0.492624		0.575492	0.205547	0.156221	0	FALSE
PTGDS	4		1		0.056411		0	0	3.58159	1	0.00014679	0.205276	0.345961	0.93	0.510261		0.501607		0.811495	0.111673	0.0458477	0	FALSE
PTGES3L-AARSD1	3		0.883757		0.533483		1		0.468057		1		0.137099		1		0.0475409		0.515296	0.246371	0.120675	5.55112e-17	FALSE
PTGR1	3		1		0.0725958		1		2.19558		1.0039e-05	0.5258	0.67155	0.78	1		0.0326816		0.797252	0.0735853	0.0507456	0.161335	FALSE
PTMS	3		1		0.100813		1		1.95495		1		0.0676581		1		0.00980227		0.831831	0.044632	0.0336013	0.0742597	FALSE
PTP4A2	4		1		0.218722		1		0.251406		1		0.282639		1		0.0768609		0.347765	0.18864	0.173444	0.0524735	FALSE
PTPN11	2		0.92152		0.189352		1		1.21703		1		0.0885329		1		1.92856e-16		0.873478	0.126522	2.1083e-33	0.491922	FALSE
PTPN1	3		1		0.103989		1		0.104126		1		0.0100335		1		4.4375e-17		0.952858	0.0471418	2.6482e-31	0	FALSE
PTPN6	2		1		0.0828083		1		1.79814		1		0.236678		1		0.0640608		0.732965	0.146133	0.0547779	0	FALSE
PTTG1IP	4		0.965018		0.11118		1		2.52989		1		0.0822122		1		0.0657916		0.790747	0.0951107	0.0735089	0.119893	FALSE
PTTG1	4		1		0.0685746		1		0.0684662		1		0.017695		1		6.85152e-18		0.979288	0.0207125	5.38308e-32	0.002815	FALSE
PWP1	4		1		0.140351		1		0.141919		1		0.0112972		1		1.22602e-17		0.988592	0.0114079	2.72974e-32	0	FALSE
QARS1	4		1		0.160946		1		1.60218		1		0.0316486		1		0.0132777		0.847533	0.142492	0.00712121	0.0765485	FALSE
QKI	3		1		0.0306903		1		1.42505		1		0.0558486		1		0.145443		0.566414	0.292868	0.0648109	0.0396106	FALSE
RAB11A	3		1		0.0876904		1		0.429549		1		0.767378		1		0.0477258		0.713917	0.234612	0.0506261	0	FALSE
RAB11FIP1	2		0.762567		0.294544		0.396736		1.25064		1		0.0125084		1		0.0110496		0.747523	0.187992	0.048392	0	FALSE
RAB13	4		1		0.170249		1		0.24735		1		0.256505		1		0.0931738		0.690489	0.299317	0.0101938	0.0249221	FALSE
RAB14	3		1		0.0762493		1		0.0622573		1		3.53258e-18		1		9.86924e-18		1	3.40585e-32	2.88416e-64	0	FALSE
RAB2A	4		0.993772		0.0521293		1		2.09709		0	0.345222	0.325984	0.87	1		0.189157		0.80142	0.0781412	0.0463377	0.0180613	FALSE
RAB8B	3		0.841421		0.0987923		0.527618		1.99545		0.1478	0.869091	0.876443	0.58	1		0.252465		0.626339	0.18329	0.0698485	0.122949	FALSE
RAC1	4		1		0.032972		1		0.000369777		1		0.00954877		1		0.0014221		0.477507	0.384086	0.0663368	0	FALSE
RAD23A	4		1		0.0452346		1		0.0341463		1		0.356526		1		0.132761		0.423144	0.401184	0.175672	0	FALSE
RAD50	2		1		0.707107		1		0.352175		1		0.343488		1		0.187428		0.690658	0.207226	0.0697674	0.0495108	FALSE
RALBP1	4		1		0.190555		1		2.12841		1		0.0887282		1		0.00471798		0.832143	0.153609	0.0142478	0	FALSE
RANBP1	4		0.841421		0.045326		1		1.71755		0.881236		0.135143		1		0.0660523		0.839201	0.128102	0.0317688	0.00395285	FALSE
RARRES1	3		1		0.0771502		0.000555226	0.19644	2.10564	0.93	1		0.168672		1		0.030932		0.711413	0.147266	0.0961031	0	FALSE
RARRES2	4		1		0.0699182		1		2.13834		1		0.0656136		1		0.0755695		0.872472	0.0616848	0.0301225	0.0166133	FALSE
RARS2	2		1		0.181568		1		0.0129376		1		0.171416		1		0.00499961		0.768556	0.179198	0.0343121	0	FALSE
RASGRP2	2		1		0.10624		2.93095e-05	0.726056	1.56748	0.66	1		0.111664		1		0.0886215		0.662431	0.183653	0.0916057	0	FALSE
RASSF4	2		1		0.151955		1		0.027518		1		0.143856		1		0.0016901		0.354794	0.305504	0.175768	0	FALSE
RBIS	4		1		0.330404		1		0.0413917		1		0.305394		1		0.159226		0.814795	0.169255	0.0159494	5.55112e-17	FALSE
RBM25	4		0.378747		0.2635		1		1.64934		1		0.814154		1		0.221747		0.599079	0.152527	0.0955769	0	FALSE
RBM27	4		1		0.157512		1		1.15264		1		0.577121		1		0.233254		0.446814	0.325143	0.182536	0.170531	FALSE
RBM8A	4		1		0.130696		1		0.00195656		1		0.129531		1		0.0191003		0.557105	0.358208	0.0846874	0	FALSE
RBP1	3		0.931066		0.142752		1		0.702872		1		0.197741		1		0.111122		0.678957	0.266412	0.0546312	0.0793767	FALSE
RBP7	3		1		0.0481154		1		2.39937		1		0.317229		1		0.0691765		0.887166	0.0807372	0.0161855	0.0178646	FALSE
RBPJ	2		1		0.0724714		0.000206627	0.0367123	2.39098	0.99	1.68779e-15	0	1.00885	1	1		0.179204		0.487551	0.25428	0.0843907	0.137783	FALSE
RBPMS	3		1		0.0739071		0.460462		2.07961		6.77546e-05	0.0401681	0.816073	0.99	0.57734		0.169173		0.595825	0.158646	0.106157	0.00832386	FALSE
RBX1	4		1		0.081872		1		1.10821		1		1.44452		1		0.0840422		0.602825	0.290841	0.0482909	0.00202772	FALSE
REEP5	4		0.908484		0.123777		1		1.44099		2.44001e-08	0.154194	1.61116	0.95	1		0.0976771		0.707453	0.266754	0.0155516	0	FALSE
REL	2		1		0.137063		1		0.635827		1		1.18167		1		0.245332		0.704307	0.226307	0.0349223	0.238177	FALSE
RER1	4		1		0.199158		0.00272682	0.312233	1.43483	0.12	1		0.0454134		1		0.0697498		0.657987	0.159942	0.0837254	0.0357263	FALSE
RETN	2		0.765913		0.13464		1		1.49019		1		0.0349527		1		0.000335152		0.921978	0.0758994	0.00212312	0.0378019	FALSE
RFC1	4		1		0.0977286		1		0.909391		0.0162781	0.102429	0.750681	0.97	1		0.221128		0.475453	0.207249	0.193475	0	FALSE
RFC4	2		0.762574		0.11774		1		1.16203		1		0.391275		1		0.104079		0.364477	0.281375	0.239423	0	FALSE
RFXANK	2		1		0.166091		1		0.165927		1		0.00738195		1		5.28783e-17		0.827348	0.172652	5.84779e-33	2.77556e-17	FALSE
RGCC	2		1		0.424264		1		0.0423623		1		0.391588		1		0.073525		0.743204	0.134009	0.0916831	5.55112e-17	FALSE
RGS16	2		1		0.04		1		0.02757		1		0.0209737		1		6.56957e-17		0.992902	0.0070981	6.87973e-32	0	FALSE
RGS2	2		0.985704		0.0539342		1		1.31246		1		0.0436956		1		0.0286972		0.76988	0.217134	0.012986	0.224549	FALSE
RHOA	4		1		0.222584		1		0.182181		1		1.14075		1		0.0252975		0.599812	0.15771	0.0518378	0	FALSE
RHOBTB3	2		1		0.188583		1		0.000221778		1		0.00273917		1		0.177341		0.5616	0.239396	0.149114	0	FALSE
RHOQ	2		1		0.350654		1		0.321506		1		0.12529		1		0.176134		0.373005	0.307509	0.24211	2.53813	FALSE
RMDN1	3		1		0.340219		0.396736		1.56606		1		0.214745		1		0.112787		0.545015	0.198339	0.0889087	0	FALSE
RNASEH2B	3		1		0.330753		1		1.439		0.0862324	0.869091	1.15217	0.42	1		0.0646424		0.735603	0.189876	0.0399813	0.143197	FALSE
RNASEH2C	2		1		0.0613909		1		0.0531661		1		1.48664e-17		1		2.52879e-18		1	3.55179e-32	8.87619e-35	6.93889e-18	FALSE
RNASEK-C17orf49	2		1		0.420317		1		0.389744		1		0.0716699		1		2.26672e-17		0.68161	0.31839	2.2857e-32	5.55112e-17	FALSE
RNASET2	2		1		0.388266		1		0.0588582		1		0.0438669		1		0.0933179		0.371103	0.198024	0.1874	0.00500055	FALSE
RNF114	3		1		0.131599		1		0.122383		1		0.0246542		1		0.0417738		0.528424	0.456742	0.0144705	0	FALSE
RNF130	4		1		0.135017		1		1.46682		1		0.500715		1		0.636682		0.518694	0.225687	0.1574	0.00899707	FALSE
ROCK1	3		0.411656		0.136359		7.83094e-05	0.223333	1.31979	0.92	0.000280087	0.327771	0.291286	0.88	1		0.159639		0.63034	0.148369	0.0973159	0.206373	FALSE
ROCK2	3		1		0.214439		1		0.00672787		1		0.0193037		1		0.198686		0.652814	0.255673	0.0870105	0	FALSE
ROMO1	4		0.335509		0.129504		1		0.0791965		0.242898	0.984118	0.188733	0.51	1		5.55434e-16		0.587092	0.412908	3.39442e-30	0.170538	FALSE
RP9P	2		0.620018		0.232459		0.33971		1.20666		1		0.301878		1		0.392447		0.398226	0.300608	0.128567	0.382488	FALSE
RPAIN	4		0.918329		0.111506		1		0.220288		1		0.530707		1		0.267357		0.35973	0.223631	0.184547	0.0245961	FALSE
RPL18A	4		1		0.0262952		1		3.9695		1		0.790909		1		0.00115611		0.674332	0.321295	0.00271898	0.00382831	FALSE
RPL21	4		1		0.0109869		1		4.24641		1		0.167362		1		0.0320936		0.697998	0.138621	0.0854772	0	FALSE
RPL22	4		1		0.0399492		1		0.00289777		1		0.00769558		1		0.00751679		0.53962	0.446281	0.00824991	0	FALSE
RPL26	4		1		0.110839		1		0.00144667		1		0.00397654		1		0.00350596		0.382072	0.250058	0.217854	2.77556e-17	FALSE
RPL30	4		0.48506		0.0231792		0	0	3.15508	1	0	0	1.05371	1	1		0.624962		0.718157	0.106713	0.0711016	0.000665748	FALSE
RPL38	4		1		0.00835359		0	0	2.37637	1	0	0	0.0938231	1	1		0.159932		0.704474	0.274358	0.0154534	0.00510224	FALSE
RPL8	4		0.994587		0.0510288		0	0	1.55756	1	1		0.276795		1		0.366462		0.327879	0.198016	0.089694	0	FALSE
RPLP0	4		1		0.252571		1		0.028869		1		0.0107001		1		0.0026287		0.561334	0.154769	0.105983	0	FALSE
RPP30	4		1		0.434218		1		0.806992		1		0.333504		1		0.0883138		0.838718	0.0638799	0.0466932	0.0938712	FALSE
RPS15	4		1		0.00332102		1		3.80665		1		0.0574781		1		0.00175684		0.968466	0.0220712	0.00471583	0.000714263	FALSE
RPS25	4		1		0.140784		1		0.0163483		1		0.0135673		1		0.127415		0.772616	0.154212	0.0316827	0	FALSE
RPS27L	4		1		0.208322		1		0.138095		1		0.954875		1		0.0110776		0.947615	0.0489198	0.00321094	0.00333753	FALSE
RPS29	4		1		0.00665469		1		0.000934438		1		0.000220343		1		0.000497244		0.507951	0.309705	0.171612	8.67362e-19	FALSE
RPS3A	4		1		0.016068		1		0.00363184		1		0.00115099		1		0.00672588		0.466883	0.185249	0.0899875	0	FALSE
RPS4X	4		0.913044		0.00443539		0	0	0.780068	1	1		0.00945894		1		0.00116517		0.276973	0.203369	0.0690985	0.00452101	FALSE
RRP9	3		1		0.127954		1		0.128644		1		0.00355594		1		2.11875e-16		0.999296	0.000704083	2.11551e-32	0	FALSE
RSL1D1	4		1		0.15865		1		0.450529		1		0.109143		1		0.299862		0.390747	0.225554	0.18132	0	FALSE
RSRC1	2		1		0.0828797		1		0.792427		1		1.20527		0.507833		0.408027		0.542921	0.360916	0.0607739	0.0495902	FALSE
RTN4	3		0.616559		0.295224		1		1.00941		1		1.21035		0.257032	0.931288	0.320772	0.54	0.437093	0.29534	0.109172	0.104715	FALSE
RTRAF	4		1		0.25921		1		0.26997		1		0.0252512		1		0.0652041		0.70258	0.175573	0.0863684	0.00920966	FALSE
RUFY1	2		1		0.027443		1		2.02056		0.00523147	0.0735385	0.898003	0.98	1		0.131339		0.679397	0.142702	0.0780799	0.222547	FALSE
RUVBL2	2		1		0.000389256		1		0.00760441		1		0.0134683		1		0.0352861		0.59426	0.383623	0.0176749	0	FALSE
RWDD1	4		0.257269		0.0744356		1		1.28404		0.0149364	0.846018	0.350515	0.6	7.02427e-06	0	0.186696	1	0.508296	0.342086	0.0709061	0	FALSE
S100A10	4		1		0.0940333		1		0.00190867		1		0.00227575		1		0.00142555		0.542974	0.0996691	0.0690411	0	FALSE
S100A11	4		1		0.140152		1		0.00690755		1		0.00679305		1		0.00560577		0.403779	0.278736	0.222663	0	FALSE
S100A2	3		1		0.00843247		1		0.145627		1		0.0272558		1		0.0071345		0.232815	0.181867	0.142707	2.08167e-17	FALSE
S100A4	4		1		0.0225374		0	0	5.83503	1	1.4778e-07	0	0.0396805	1	1		0.034208		0.969831	0.00873582	0.00869881	2.08167e-17	FALSE
S100A9	4		1		0.180841		1		0.00204119		1		0.00353865		1		0.000328072		0.558187	0.106674	0.0473543	0.037779	FALSE
SAMHD1	2		0.801547		0.245294		1		1.35801		0.852922		0.240136		1		0.274007		0.466846	0.122446	0.107816	0	FALSE
SAP18	4		0.464671		0.0884112		1		1.66773		1		0.0841351		1		0.00353455		0.726578	0.214603	0.0295257	0	FALSE
SAR1A	3		1		0.104021		1		1.3852		1		0.148507		1		0.0873628		0.727885	0.118393	0.082358	0	FALSE
SASH1	2		1		0.210447		1		1.29306		1		0.835356		1		0.0181623		0.608091	0.296227	0.0669943	0.0991779	FALSE
SBDS	4		1		0.154145		1		1.43964		1		0.72815		1		0.0193467		0.722758	0.239406	0.0251312	0.0379303	FALSE
SCAF11	2		0.703448		0.153954		0.273411		2.42625		0.110228	0	0.57321	1	1		0.214413		0.711502	0.0893045	0.0746772	0.142044	FALSE
SCFD1	2		1		0.469668		1		0.151909		1		0.400933		1		1.12738e-16		0.901892	0.0981082	3.5107e-33	0.433138	FALSE
SCGB1A1	2		0.515982		0.0853052		1		2.36058		1		0.346818		1		0.0732088		0.749098	0.159554	0.0486696	0.295666	FALSE
SCGB3A1	3		1		0.0132986		1		3.80988		1		0.746002		1		0.0582833		0.80654	0.148416	0.0215748	0.00483037	FALSE
SCGB3A2	3		1		0.00710973		1		0.00550538		1		0.00974113		1		1.27835e-17		0.58913	0.41087	1.64573e-30	0	FALSE
SCP2	2		1		0.217744		1		0.217732		1		0.0164481		1		1.13889e-18		0.973751	0.0262493	7.61421e-34	0	FALSE
SDAD1	4		1		0.287092		1		0.0294538		1		0.191322		1		0.00418788		0.450626	0.313632	0.166762	0	FALSE
SDHB	4		0.467625		0.189208		1		1.05194		1		0.938072		1		0.0925304		0.717911	0.200903	0.0599141	0	FALSE
SEC11C	4		1		0.158255		1		0.810861		0	0.128322	1.51102	0.96	1		0.0304483		0.696128	0.226996	0.0463735	0	FALSE
SEC31A	3		0.968721		0.20817		1		0.277478		0.157214	0	0.4685	1	0.339616	0.192233	0.562413	0.94	0.374831	0.244736	0.122447	0.195165	FALSE
SEC61B	2		1		0.0982946		1		0.0802572		1		2.05093e-17		1		6.28032e-18		1	3.85671e-32	2.70786e-33	2.77556e-17	FALSE
SEC63	4		1		0.169554		1		0.452904		1		0.173725		1		0.0525648		0.626373	0.217146	0.0786659	0.11697	FALSE
SELENOH	4		1		0.125226		1		1.20773		1		0.0541144		1		0.195132		0.674661	0.199755	0.0807053	0.00956061	FALSE
SELENOK	2		1		0.0685914		1		1.42632		1		0.386981		1		0.0994365		0.589551	0.38392	0.0265294	0.142019	FALSE
SELENOM	4		1		0.0223859		1		0.018278		1		3.12905e-17		1		9.05118e-19		1	2.50965e-30	2.76245e-59	0	FALSE
SELENOS	3		1		0.138107		1		0.0285876		1		0.126986		1		0.00340926		0.711655	0.249935	0.03841	0	FALSE
SEM1	4		1		0.0154699		1		1.9468		1		0.00997721		1		0.00181212		0.955083	0.0372093	0.0057799	0	FALSE
SENP6	4		1		0.264914		0.0135014	0.926917	1.73775	0.54	0.0169955	0	0.402082	1	1		0.19634		0.542432	0.144884	0.0901199	0	FALSE
SEPTIN10	3		0.897803		0.335411		0.0973	0.536	1.04607	0.24	1		0.128881		1		0.187709		0.373392	0.246765	0.118351	0	FALSE
SERBP1	4		0.906608		0.104934		1		0.105533		5.82002e-11	0.0735385	0.93366	0.98	1		0.0812998		0.548902	0.217914	0.134189	0.0969853	FALSE
SERP1	4		1		0.0214765		1		2.17282		1		0.0197217		1		0.00432879		0.980353	0.0104146	0.00507574	0	FALSE
SERPINB1	4		0.655419		0.166346		1		0.586929		1		1.20129		1		0.431592		0.523403	0.269565	0.0708316	0.0572357	FALSE
SERPINE1	2		1		0.0676076		1		0.0100781		1		0.0761611		1		0.00415903		0.691233	0.19072	0.118047	0	FALSE
SERPINF1	3		1		0.156372		1		0.361286		1		0.0811183		1		0.106717		0.524299	0.20828	0.0643521	0.165612	FALSE
SERPING1	3		0.444717		0.0986628		1		2.13615		0.0430355	0.128322	0.539596	0.96	0.0169563	1	0.256784	0.5	0.750889	0.0785989	0.0759271	0	FALSE
SF3B2	4		1		0.15078		1		1.20552		1		0.0221009		1		0.110228		0.686378	0.196661	0.0751395	0.156385	FALSE
SF3B6	4		0.841421		0.151586		1		1.60201		0	0.50697	1.89383	0.79	1		0.000802871		0.720022	0.273876	0.00587425	0	FALSE
SFT2D1	2		1		0.144021		1		0.551122		1		0.49247		1		0.267788		0.47703	0.358978	0.153332	0	FALSE
SFTPB	3		1		0.0724266		3.2824e-09	0	2.13261	1	1		0.60537		1		0.17122		0.317591	0.119236	0.0566216	0.44314	FALSE
SGK1	3		1		0.334922		1		0.286328		1		0.0198178		1		0.0233527		0.574852	0.160814	0.130327	0.594152	FALSE
SH3GLB1	4		1		0.3064		1		0.082202		0.852922		0.301035		1		0.0726692		0.378045	0.21526	0.146083	0	FALSE
SIVA1	4		1		0.110521		1		2.5243		1		0.131702		1		0.0434924		0.765247	0.207797	0.0174535	0.0979044	FALSE
SLC25A24	2		1		0.178735		1		0.148948		1		0.0253812		1		0.0980449		0.65893	0.291256	0.0498147	0.0718305	FALSE
SLC25A36	2		0.800084		0.370584		1		0.834725		0.498163		1.19724		1		0.146395		0.641595	0.264146	0.0710854	0.271198	FALSE
SLC25A3	2		1		0.184115		1		0.170455		1		0.000948281		1		9.44386e-17		0.969148	0.0308518	2.26516e-31	0	FALSE
SLC35B1	2		1		0.135279		1		0.139643		1		0.0157322		1		0.0483547		0.653114	0.240385	0.106501	0	FALSE
SLC4A7	4		0.264474		0.380024		0.00022401	0.0367123	1.42511	0.99	1		0.471765		0.193119	0	0.390514	1	0.30404	0.271322	0.115081	0.382218	FALSE
SLIRP	4		0.361227		0.119388		1		2.77166		1		0.00114334		1		0.0369421		0.909865	0.0751719	0.0133648	0	FALSE
SLPI	4		1		0.029124		1		0.506248		1		1.87707		1		0.0663435		0.812667	0.106569	0.0425295	0.0114631	FALSE
SMAP1	4		1		0.12622		1		1.64189		1		0.0776569		1		0.0679353		0.570841	0.217234	0.135916	0	FALSE
SMAP2	4		1		0.122662		1		2.23711		1		0.213731		1		0.00976694		0.762367	0.122834	0.039145	0.166401	FALSE
SMARCC1	2		0.335509		0.171638		1		0.939895		0.875386		1.02508		1		0.13336		0.57746	0.249848	0.0707961	0.920349	FALSE
SMARCE1	4		0.304446		0.2024		1		2.0433		1		0.091608		1		0.208818		0.786506	0.108859	0.0513204	0.393116	FALSE
SMC1A	2		1		0.258983		0.000106404	0.372222	1.81097	0.85	1		0.23622		0.00173295	0.272477	0.644848	0.91	0.622406	0.21804	0.0832311	0	FALSE
SMC2	2		1		0.319884		1		0.249742		1		0.0509608		1		0.167497		0.570273	0.336892	0.092835	0	FALSE
SMC3	4		1		0.179298		1		0.0107695		1		0.167623		1		0.181152		0.550399	0.31691	0.0988096	0	FALSE
SMC4	2		1		0.128148		1		1.63076		1		0.199148		1		0.0250276		0.603127	0.3144	0.0419914	0	FALSE
SMC5	2		0.202857		0.671721		1		0.139711		1		0.331529		1		0.478451		0.541992	0.19616	0.141476	0	FALSE
SMCHD1	2		0.630473		0.388198		1		1.00749		0.132871	0.429947	0.798441	0.83	1		0.36509		0.504079	0.243007	0.096001	0.172485	FALSE
SNAPC1	2		1		0.102598		1		0.0837708		1		3.08397e-18		1		1.44348e-17		1	7.71519e-33	4.6895e-35	2.77556e-17	FALSE
SNF8	4		1		0.377631		1		0.0555077		1		0.00288462		1		0.135821		0.584955	0.265663	0.0744632	0	FALSE
SNHG12	4		1		0.208516		1		0.0698949		0.66407		0.885762		1		0.878462		0.544187	0.169347	0.143833	0	FALSE
SNHG7	3		1		0.00191931		1		0.00163064		1		0.000128578		1		0.000694257		0.624838	0.268458	0.106704	0	FALSE
SNRPA1	2		1		0.244308		1		0.15542		1		0.0104362		1		0.0315567		0.989079	0.0102844	0.00063622	0	FALSE
SNRPB2	4		1		0.0945359		0.045814	0.831008	1.02654	0.4	1		0.254665		1		1.86053e-16		0.961771	0.0382292	1.6423e-31	0.0497811	FALSE
SNRPD1	4		1		0.201585		1		0.100945		1		0.194665		0.166564	0.575	0.0927486	0.23	0.58368	0.380881	0.0354395	0	FALSE
SNRPD3	4		1		0.243889		1		0.0304715		1		0.392862		1		0.0964225		0.862417	0.12602	0.00938278	0	FALSE
SNURF	2		1		0.368455		1		0.247952		1		0.219843		1		0.161933		0.504521	0.443675	0.0349607	0	FALSE
SNW1	4		1		0.183779		1		1.6215		1		0.299018		1		0.181354		0.698538	0.1561	0.11224	0	FALSE
SNX10	2		1		0.0989482		1		0.429239		1		1.32098		1		0.0542428		0.643672	0.302334	0.0233327	0.09895	FALSE
SNX2	3		1		0.202005		1		0.00573508		1		0.162567		1		0.0372602		0.509982	0.323871	0.150478	2.77556e-17	FALSE
SNX9	4		1		0.268519		1		0.0508235		1		0.0851388		1		0.230777		0.895407	0.0777611	0.0268316	0	FALSE
SOD1	4		0.841421		0.0443801		1		1.43369		0	0.641759	0.940231	0.71	0	0.075	0.262236	0.98	0.626638	0.189152	0.107661	0.0273833	FALSE
SON	4		1		0.010565		1		1.83071		1		0.248013		1		0.208209		0.759615	0.0929145	0.0708715	0.0201973	FALSE
SP100	4		0.975301		0.1898		1		1.02378		1		0.595331		1		0.0839181		0.338849	0.171882	0.112764	0.0893942	FALSE
SP110	4		1		0.422988		1		1.34211		1		0.542233		1		0.23632		0.295896	0.276447	0.13778	0.324858	FALSE
SPATA6	3		1		0.0729893		1		2.58539		1		0.0153392		1		0.221837		0.708177	0.0866467	0.067628	0	FALSE
SPCS2	3		1		0.073286		1		0.0122638		1		0.00905821		1		0.00147859		0.686168	0.281133	0.029175	0	FALSE
SPRY1	3		1		0.070318		1		0.000666975		1		0.05972		1		0.0371179		0.968113	0.0244362	0.00745059	0	FALSE
SPTBN1	2		1		0.39841		1		0.373632		1		0.0361928		1		0.0135122		0.629091	0.260457	0.110453	0	FALSE
SQOR	2		1		0.0491473		1		0.0401286		1		1.7961e-17		1		2.52772e-18		1	3.59379e-32	6.681e-64	0	FALSE
SREK1IP1	2		0.483558		0.225946		1		1.45553		1		0.754422		1		0.042539		0.548416	0.36019	0.0488144	0.0298892	FALSE
SRFBP1	3		1		0.192993		1		0.00123873		1		0.191525		1		0.0636725		0.795324	0.202074	0.00209035	0.0227755	FALSE
SRI	4		0.60433		0.131646		1		0.948863		0	0.0735385	1.8336	0.98	1		0.017203		0.632088	0.293336	0.0488894	0.0146707	FALSE
SRM	3		1		0.00253958		1		0.309349		1		1.19328		1		0.263889		0.518652	0.263969	0.142128	0	FALSE
SRP14	4		1		0.207495		1		0.228233		1		0.0236675		1		3.47418e-17		0.719023	0.280977	2.28118e-32	0	FALSE
SRP19	2		1		0.0588229		1		1.5435		1		0.590456		1		0.191808		0.475074	0.273231	0.233092	0.0564112	FALSE
SRPK1	2		1		0.195278		1		0.00346611		1		0.00844021		1		0.194078		0.76633	0.176482	0.0486237	0	FALSE
SRPRA	2		0.847161		0.189492		1		0.184253		1		0.0585579		1		9.21046e-17		0.973301	0.0266987	5.03658e-32	2.77556e-17	FALSE
SRRM1	4		0.861784		0.105278		1		1.42506		1		0.775263		1		0.283192		0.626326	0.15651	0.0588743	0.0230779	FALSE
SRRM2	4		0.44369		0.0704406		1		0.81054		1		0.723964		1		0.541021		0.361004	0.285718	0.178239	0	FALSE
SRSF10	3		0.641828		0.407696		1		0.660193		1		0.744117		1		0.157303		0.507724	0.315677	0.163952	0.212704	FALSE
SRSF3	4		1		0.313067		1		1.78098		1		0.182715		1		0.177127		0.764761	0.158456	0.0495384	0.0404927	FALSE
SRSF4	2		0.393878		0.420972		1		0.780171		1		0.127223		1		0.0249888		0.709428	0.246977	0.0435941	0	FALSE
SSBP1	4		1		0.0261258		1		0.029244		1		0.00583704		1		5.22528e-17		0.623475	0.376525	5.91096e-30	0	FALSE
SSB	4		0.635881		0.0580194		1		1.39915		0.00484163	0.47057	0.523346	0.81	1		0.485006		0.457141	0.25657	0.131144	0.0132551	FALSE
SSR3	4		1		0.0450544		1		1.75233		0.00321242	0.327771	0.385784	0.88	1		0.0324863		0.711192	0.23994	0.0295727	0	FALSE
ST13	2		1		0.0417029		1		0.0340503		1		1.53649e-18		1		9.74745e-18		1	3.15574e-35	6.58332e-36	0	FALSE
STAT3	4		0.479324		0.310693		2.43948e-06	0.19644	1.12858	0.93	1		0.391487		1		0.0898578		0.729988	0.234812	0.0237039	0.347096	FALSE
STAU1	4		0.580517		0.107574		1		0.343907		1		1.25159		1		0.0568027		0.551939	0.220035	0.0794124	0.144688	FALSE
STOML2	3		1		0.104316		1		0.0138297		1		0.115761		1		0.027933		0.957758	0.0411098	0.0011326	0	FALSE
STX8	4		1		0.0668715		1		3.01503		1		0.0887007		1		0.198245		0.902296	0.0445858	0.0420069	0	FALSE
SUCLG1	2		0.249334		0.69035		1		0.137616		0.000295805	0.620481	0.692636	0.73	1		0.00276237		0.946796	0.0513661	0.0018076	0	FALSE
SUDS3	3		1		0.210083		1		1.7654		1		0.0217118		1		0.0530778		0.598339	0.224973	0.0800929	0	FALSE
SUGT1	4		1		0.343918		1		0.028916		1		0.517639		0.749764		0.294995		0.450186	0.261141	0.110394	0.132979	FALSE
SURF1	4		1		0.0230872		1		1.40255		1		0.0157191		1		0.0122696		0.93944	0.0327815	0.0260817	0	FALSE
SURF2	2		1		0.363198		1		0.0338948		1		0.0971485		1		0.191762		0.698793	0.206157	0.0564309	0	FALSE
SVIL	4		1		0.116131		1		1.64079		0.251067	0.0735385	1.10422	0.98	1		0.715668		0.566139	0.171036	0.107923	0.0234531	FALSE
SYAP1	2		0.863091		0.138009		1		0.834135		1		0.0217661		1		0.047263		0.651597	0.253001	0.0954015	1.41858	FALSE
SYNCRIP	4		0.619536		0.166102		0.148602	0.244873	1.52371	0.91	1		0.266171		1		0.117785		0.302776	0.244935	0.189889	0.0106081	FALSE
TACC1	4		1		0.057193		2.25829e-12	0.0962874	1.51372	0.97	1.68209e-08	0	0.985654	1	1		0.151309		0.385395	0.159116	0.108296	0.0706023	FALSE
TAF10	4		1		0.0489277		1		1.79992		1		0.496152		1		0.068358		0.644692	0.281396	0.064594	0	FALSE
TAF1D	4		1		0.309271		1		0.097587		1		0.160955		1		0.203886		0.544947	0.295053	0.0585129	0	FALSE
TAOK3	2		1		0.376026		1		0.098285		1		0.2268		1		0.00744636		0.399562	0.217698	0.154725	0	FALSE
TAX1BP1	4		0.730116		0.0655979		0.378352		1.91507		0	0	0.373789	1	1		0.419623		0.595181	0.0897162	0.0831198	0.091886	FALSE
TBCB	4		1		0.0865186		1		1.57729		1		0.0396532		1		0.000743518		0.899968	0.0943594	0.00567271	0	FALSE
TBRG1	3		1		0.0743113		1		0.0740986		1		0.00569128		1		4.15379e-17		0.99993	6.9896e-05	3.39738e-32	0	FALSE
TCEA2	2		1		0.0613175		1		2.13392		1		0.00321473		0.382816	0.385	0.14833	0.86	0.945044	0.0358894	0.0190668	0.34964	FALSE
TCEA3	2		1		0.132719		1		0.337735		1		1.49866		0.528908		0.154667		0.493566	0.38843	0.0384338	0	FALSE
TCEAL4	2		0.899419		0.045977		1		1.87036		3.10054e-08	0.205276	0.485808	0.93	1		0.119184		0.787724	0.11356	0.0776687	0.0687669	FALSE
TCF25	4		1		0.273307		1		0.603951		1		0.70046		1		0.0266707		0.549742	0.277371	0.109421	0.0411735	FALSE
TCF4	2		1		0.185106		1		0.0148069		1		0.00769991		1		0.0205016		0.532722	0.201728	0.152057	0	FALSE
TCP1	3		1		0.258746		1		0.0824773		1		0.0609219		1		0.0715772		0.624095	0.359024	0.0137294	0.0788652	FALSE
TCTEX1D2	3		0.730116		0.207261		1		2.36213		1		0.0179695		1		0.0107268		0.944183	0.0230677	0.0147801	0.158656	FALSE
TECR	4		1		0.156406		1		0.0380597		1		0.151048		1		0.0158828		0.531537	0.454469	0.0139942	0	FALSE
TESC	3		1		0.271138		1		0.0886358		1		0.448591		1		0.00601633		0.751812	0.115419	0.0482265	0	FALSE
TFAM	4		0.348836		0.143058		1		2.00697		1		0.146465		1		0.0194534		0.894175	0.053857	0.0368058	0.0628246	FALSE
TFPI	4		1		0.119515		1		1.48569		1		0.24556		1		0.048525		0.376411	0.237828	0.13914	0.00633579	FALSE
TFRC	2		0.616559		0.183693		1		1.0215		0.000634143	0.408984	1.34172	0.84	1		0.107666		0.476393	0.247424	0.0824809	0	FALSE
TGFBR2	3		0.993094		0.147149		1		0.412328		1		0.503619		0.0780619	0.819608	0.272172	0.62	0.608422	0.174054	0.134173	0.0158465	FALSE
TGOLN2	3		1		0.0557711		1		0.0482992		1		6.10847e-17		1		1.18601e-17		1	1.8168e-30	1.99088e-36	6.93889e-18	FALSE
TGS1	3		1		0.181801		1		0.189464		1		0.0938812		1		0.0440771		0.703115	0.29305	0.00383491	0	FALSE
THOC2	3		0.869092		0.172845		1		1.278		1		0.249351		0.00685403	0.075	0.240349	0.98	0.456069	0.217662	0.104888	0.271182	FALSE
THYN1	4		1		0.152103		1		0.7572		1		0.454805		1		0.0962413		0.753127	0.127042	0.0584239	0	FALSE
TIMM13	2		1		0.0932505		1		0.0761387		1		2.04227e-17		1		3.04561e-19		1	3.92963e-33	4.89233e-35	0	FALSE
TIMP1	4		1		0.00775389		1		3.45368		1		0.430001		1		0.0338651		0.686655	0.0786195	0.055209	0.00526094	FALSE
TIMP2	3		1		0.0715101		1		0.0739867		1		0.0167814		1		7.39369e-17		0.765172	0.234828	1.09649e-30	0	FALSE
TKT	3		0.316851		0.124134		1		2.28585		2.89442e-10	0	0.389342	1	1		0.241386		0.815408	0.0682711	0.0373172	0	FALSE
TLN1	4		0.868661		0.212674		1		0.108398		1		0.679727		1		0.230802		0.790061	0.0747112	0.0394813	0	FALSE
TM4SF1	3		1		0.213495		1		0.177398		0.00022841	0.660829	0.28742	0.7	1		0.0174621		0.450927	0.293282	0.173079	0	FALSE
TMA7	4		1		0.18289		1		0.0297989		1		0.157734		1		0.127293		0.824326	0.110956	0.064718	5.55112e-17	FALSE
TMBIM6	4		1		0.0852475		1		0.23683		1		1.26077		1		0.334633		0.505464	0.11961	0.0645211	0.00571971	FALSE
TMEM126A	3		1		0.259828		1		0.134983		1		0.191974		1		0.0344145		0.555907	0.398686	0.0454073	5.55112e-17	FALSE
TMEM147	4		1		0.136987		1		0.0821208		1		0.0607766		1		0.0915812		0.812374	0.142433	0.0341589	0	FALSE
TMEM14B	4		1		0.311197		1		0.266945		1		0.351125		1		0.0194266		0.460007	0.124564	0.114178	0	FALSE
TMEM14C	4		0.760134		0.105214		1		2.11626		1		0.26985		1		0.0347002		0.725817	0.173687	0.0476249	0.147689	FALSE
TMEM176A	3		1		0.171792		0.0014307	0.19644	0.514763	0.93	1		0.22517		1		0.0257055		0.673537	0.223237	0.103226	0	FALSE
TMEM189-UBE2V1	2		1		0.0665652		1		1.20048		1		1.65947		1		0.177233		0.48509	0.334804	0.15924	0.050695	FALSE
TMEM208	3		1		0.0350088		1		1.66315		1		0.0357192		1		0.0404254		0.938658	0.044142	0.0172	0	FALSE
TMEM220	3		1		0.116724		1		0.966595		1		1.34345		1		0.0119406		0.52374	0.325571	0.0588176	0.147723	FALSE
TMEM238	2		1		0.00404385		1		0.00621881		1		0.0118466		1		0.00414057		0.564833	0.242217	0.147207	0	FALSE
TMEM258	4		0.680508		0.0827154		1		2.21297		1		0.078857		1		0.147065		0.790155	0.116526	0.0507757	0.044975	FALSE
TMEM30A	2		1		0.178107		1		0.177447		1		0.017718		1		4.30846e-17		0.999631	0.000369194	5.5199e-33	0	FALSE
TMEM40	2		1		0.0349571		2.30762e-05	0.726056	2.5917	0.66	1		0.18154		1		0.00626937		0.743419	0.0945732	0.0642221	0	FALSE
TMEM59	4		1		0.130518		1		0.0348658		0.275098	0	0.0963243	1	0.012164	0.168367	0.306069	0.95	0.945159	0.0384688	0.0145894	0.0102333	FALSE
TMEM97	2		1		0.459386		1		0.481268		1		0.0363127		1		2.23687e-17		0.963105	0.036895	1.02603e-32	0	FALSE
TMOD3	4		1		0.13894		1		0.061225		1		0.0716796		1		0.123125		0.609404	0.253378	0.137218	0.095907	FALSE
TMSB4X	4		1		0.127749		1		0.0037093		1		0.00460951		1		0.00218189		0.45555	0.305819	0.0821875	0	FALSE
TMX4	4		1		0.148514		1		0.148336		1		0.00842626		1		1.29516e-16		0.999906	9.36945e-05	4.55544e-32	0	FALSE
TNFAIP6	2		1		0.0302955		1		0.00276638		1		0.0045532		1		0.00503875		0.771144	0.189756	0.0381913	0.922261	FALSE
TNFSF10	4		1		0.173992		1		1.62355		1		0.0782842		1		0.0574194		0.615116	0.205814	0.0907602	0.0746999	FALSE
TNFSF13B	3		1		0.378464		1		0.28623		1		0.076404		1		0.248542		0.677509	0.237919	0.0384782	0	FALSE
TNNT1	2		1		0.0291111		1		0.0237691		1		6.82056e-18		1		1.26629e-18		1	5.55572e-32	1.23256e-64	3.46945e-18	FALSE
TNNT3	2		1		0.191152		1		0.712301		1		0.824165		1		0.144818		0.48124	0.255769	0.168243	0.060628	FALSE
TNRC6B	3		1		0.0316521		1		2.21617		1		0.167737		0.962324		0.53972		0.739621	0.119611	0.0785059	0	FALSE
TOMM6	3		1		0.14348		1		0.160144		1		0.137367		1		0.136054		0.402907	0.280425	0.231139	0.726395	FALSE
TOMM7	4		1		0.0190196		1		2.44378		1		0.0574015		1		0.011306		0.956382	0.0229979	0.00992932	0.000224972	FALSE
TOP1	4		0.967051		0.158825		1		1.23506		1		0.873833		1		0.688364		0.596237	0.178855	0.139672	0.0397484	FALSE
TOP2A	2		1		0.0824786		1		0.0673435		1		2.16486e-17		1		6.42296e-18		1	6.54277e-33	2.07854e-34	0	FALSE
TP53TG1	2		1		0.0972396		1		0.985663		1		0.42505		1		0.267736		0.60691	0.278282	0.100667	0.0370509	FALSE
TPM3	4		1		0.163702		1		1.32454		1		1.30246		1		0.125886		0.530082	0.272255	0.0693416	0.0542928	FALSE
TRAM1	4		1		0.270203		1		0.222035		1		0.454769		0.962324		0.609665		0.499887	0.274377	0.0973361	0.0228326	FALSE
TRAPPC2L	4		1		0.0508746		1		0.0237123		1		0.123851		1		0.0956585		0.411284	0.335549	0.210567	6.93889e-18	FALSE
TREM2	2		1		0.198959		1		0.0893553		1		0.0326625		0.147672	0.678082	0.158577	0.7	0.758276	0.14989	0.0774906	0.579674	FALSE
TRPT1	3		1		0.376817		1		0.376778		1		0.0137241		1		0.0407663		0.675776	0.172035	0.151832	0	FALSE
TSPAN8	2		1		0.1536		1		0.314895		1		0.127889		1		1.13129		0.769815	0.176595	0.0534337	0.00736407	FALSE
TTC19	3		1		0.0117601		1		1.36614		1		0.22268		1		0.0270336		0.73527	0.173182	0.0676949	0	FALSE
TXNDC17	4		0.350409		0.0685471		1		2.6015		1		0.45274		1		0.0614835		0.672841	0.235388	0.0458523	0.0520091	FALSE
TXNL1	4		1		0.266811		1		0.043474		1		0.00990117		1		0.209255		0.81833	0.0805757	0.0637003	0	FALSE
TXNRD1	3		1		0.119782		1		0.048087		1		0.00992683		1		0.0141303		0.402086	0.315393	0.193305	0.0358366	FALSE
TYMP	4		1		0.0887814		1		1.2789		1		0.691591		1		0.0605409		0.541179	0.366975	0.0447463	0.0160215	FALSE
TYROBP	4		1		0.0604184		0	0	2.16062	1	1		0.11513		1		0.776384		0.447385	0.260223	0.163369	0.0107456	FALSE
TYW3	4		1		0.257033		1		0.613389		6.20027e-05	0.846018	0.592655	0.4	6.81367e-11	0.931288	0.626236	0.46	0.5779	0.273681	0.090562	0	FALSE
U2SURP	3		1		0.210819		1		0.190511		1		0.02725		1		4.38494e-18		0.801766	0.198234	3.36052e-32	0	FALSE
UBE2C	2		1		0.20739		1		0.0979294		1		0.162025		1		5.09901e-17		0.869494	0.130506	2.37086e-33	1.09756	FALSE
UBE2D1	2		1		0.0718528		0.145968	0.265347	1.91602	0.9	1		0.395481		1		0.136992		0.734697	0.172751	0.0702321	0	FALSE
UBE2D3	4		0.421312		0.280361		9.55902e-15	0.713226	1.85575	0.67	1		0.063161		1		0.126592		0.703498	0.186347	0.0473018	0	FALSE
UBE2H	4		1		0.175193		1		1.87865		1		0.0383501		1		0.00509235		0.683494	0.193528	0.105252	0	FALSE
UBE2K	3		1		0.280426		1		0.0335337		1		0.279985		0.245056	0.272477	0.149399	0.91	0.392434	0.306417	0.138321	0	FALSE
UBE2Q2	3		1		0.0979935		1		1.99436		1		0.0152627		0.000177957	0.344348	0.368904	0.88	0.767259	0.0898459	0.0501528	0.101654	FALSE
UBN1	3		1		0.341144		1		0.118111		1		0.240372		1		0.158915		0.777276	0.172824	0.0499005	0	FALSE
UBXN1	4		0.358536		0.121933		1		0.723946		1		1.24237		1		0.0171226		0.713285	0.253191	0.0150783	0.0460235	FALSE
UBXN4	4		1		0.261086		1		0.0285561		1		0.0289182		1		0.108976		0.653073	0.264095	0.0640349	0	FALSE
UCHL3	4		1		0.0832602		1		1.98064		1		0.0579658		1		0.0396593		0.766532	0.0834873	0.0562594	0.0805945	FALSE
UFC1	3		1		0.144112		1		1.68338		1		0.0632061		1		0.0270433		0.519314	0.255968	0.128353	0.220725	FALSE
UPF3B	2		1		0.353527		1		0.0159278		1		0.382421		1		0.320793		0.752984	0.15883	0.0757963	0	FALSE
UPP1	4		0.492338		0.330366		1		0.698672		1		0.269868		0.000529412	0.318421	0.291106	0.89	0.300303	0.214888	0.115542	0.115635	FALSE
UQCC2	4		1		0.036251		1		1.8518		1		0.0143782		1		0.0266075		0.813318	0.0941194	0.0575067	0.0347663	FALSE
UQCR10	4		1		0.0278459		1		1.11645		1		0.11678		1		0.129908		0.862789	0.104575	0.0326357	0	FALSE
UQCRC1	3		1		0.12125		1		0.0508729		1		0.00936168		1		0.194207		0.922323	0.0726458	0.00503116	0	FALSE
UQCRH	4		1		0.0144734		1		0.00105821		1		0.0120206		1		0.000781606		0.96898	0.0187904	0.00813451	0	FALSE
UROD	4		1		0.314605		1		0.325364		1		0.0571871		1		0.0242911		0.788525	0.169149	0.0376166	0.0111256	FALSE
USP16	2		1		0.816497		1		0.666667		1		1.62626e-16		1		1.77058e-17		1	1.69894e-32	2.10129e-64	1.02062	FALSE
USP7	3		1		0.41738		1		0.108303		0.0018936	0.180377	0.85588	0.94	1		0.228199		0.859008	0.0845529	0.0537315	0	FALSE
USP8	2		0.784845		0.295233		1		1.6409		0.587129		1.02649		1		0.0536575		0.641326	0.219124	0.0689558	0	FALSE
UVRAG	3		1		0.114954		1		1.24772		1		0.858161		1		0.174965		0.714122	0.188239	0.0709041	0.00356453	FALSE
UXT	4		1		0.0645366		1		1.69837		1		0.18789		1		0.223326		0.709601	0.173971	0.0721635	0	FALSE
VAPA	3		1		0.388697		1		0.349575		1		0.227121		1		0.178219		0.851713	0.13062	0.0176669	0	FALSE
VCAN	2		1		0.00781986		0.388137		1.6753		1		0.795157		1.93938e-06	0.192233	0.261115	0.94	0.494054	0.2049	0.103343	0.134753	FALSE
VCL	2		1		0.0995037		1		0.0908232		1		0.00140258		1		1.04356e-17		0.938305	0.0616953	1.40168e-33	0.450248	FALSE
VPS28	4		1		0.0388882		1		1.69056		1		0.278813		1		0.00386504		0.656993	0.25764	0.0486907	0.0346106	FALSE
VPS29	3		1		0.369509		1		0.0832289		1		0.359412		1		0.0630129		0.584152	0.338838	0.0464299	0.177913	FALSE
VPS35	2		1		0.181568		1		0.00889011		1		0.170805		1		0.0203838		0.507235	0.335264	0.15309	0	FALSE
VPS36	3		1		0.283812		1		0.955057		1		1.14438		1		0.0123149		0.47577	0.228513	0.0778025	0	FALSE
VRK1	2		0.545879		0.196001		0.0617794	0.913636	2.03301	0.55	0.244959	0.233171	0.326774	0.92	0.0606028	0.105319	0.445993	0.97	0.775669	0.133627	0.0590695	1.05133	FALSE
WASF2	4		1		0.0292063		1		0.00544911		1		0.0260988		1		3.64087e-17		0.983867	0.0161331	6.11249e-31	3.46945e-18	FALSE
WASHC3	4		1		0.158402		7.83094e-05	0.517983	2.10493	0.77	1.66365e-13	0.307485	1.10937	0.89	1		0.0487353		0.776865	0.166056	0.0255648	0.0383707	FALSE
WASL	2		1		0.103975		1		0.0848953		1		3.91958e-18		1		7.47611e-18		1	6.06837e-33	8.13181e-36	0	FALSE
WBP4	4		0.704949		0.183071		1		1.77308		0.00165912	0.891186	0.537963	0.56	1.22084e-08	0.105319	0.367454	0.97	0.675921	0.203005	0.0630555	0.223224	FALSE
WDR54	2		1		0.190117		1		0.124435		1		0.107816		1		6.67149e-17		0.569496	0.430504	2.17541e-31	0	FALSE
WDR83OS	2		1		0.059655		1		0.0487081		1		2.89698e-18		1		1.49415e-18		1	2.42798e-34	7.03905e-35	6.93889e-18	FALSE
WFDC21P	2		1		0.0511303		1		1.24363		1		0.2522		0.747174		0.249537		0.65123	0.230457	0.0845457	0.709479	FALSE
XPA	3		1		0.166191		0.363631		1.93638		1		0.118421		1		0.0449752		0.778266	0.129357	0.0430076	0.355105	FALSE
XPO1	3		0.797262		0.30446		1		2.47139		0.666614		0.150172		1		0.305658		0.84431	0.0867657	0.0463481	0.0471388	FALSE
YBX1	4		0.251524		0.0709709		1		2.1206		0	0.452842	0.168235	0.82	1		0.132582		0.735397	0.0784946	0.0659386	0.0347699	FALSE
YIF1A	4		0.455188		0.20239		1		0.808507		1		0.350864		1		0.19438		0.710863	0.196198	0.0663187	0	FALSE
ZC3H13	4		1		0.615725		1		0.122555		1		0.191935		1		0.415974		0.384306	0.199529	0.124694	1.11022e-16	FALSE
ZCCHC17	4		1		0.309463		1		0.0695743		1		0.376852		1		0.259739		0.550675	0.15407	0.125212	0.0778131	FALSE
ZFAND2A	3		1		0.319646		1		0.279989		1		0.263141		1		0.068367		0.429971	0.297949	0.221806	1.11022e-16	FALSE
ZFP91-CNTF	2		1		0.349927		1		0.285714		1		1.64284e-17		1		3.20449e-17		1	5.96032e-34	8.55043e-65	0.801916	FALSE
ZNF326	2		1		0.557102		1		0.179922		1		0.250127		1		0.772477		0.454596	0.19173	0.155222	0.113987	FALSE
ZNF706	4		1		0.196621		1		0.0245799		1		0.154694		1		0.125393		0.893775	0.101854	0.00437074	0	FALSE
ZRANB2	4		1		0.0748		0.138555	0.610081	1.84671	0.28	0	0	0.520557	1	1		0.0850074		0.74333	0.132286	0.0544353	0	FALSE
unknown_chr6_GL000251v2_alt_3900000	2		1		0.051024		1		0.0122221		1		0.0449462		1		5.68712e-17		0.813525	0.186475	7.58085e-31	6.93889e-18	FALSE
unknown_chr6_GL000255v2_alt_3800000	2		1		0.163032		1		0.133115		1		6.12198e-17		1		5.224e-18		1	1.99448e-31	1.06291e-63	2.77556e-17	FALSE
unknown_chrUn_GL000219v1_100000	2		1		0.192906		2.60846e-11	0.312233	2.20592	0.88	1		0.250475		1		0.139966		0.628832	0.211477	0.0772372	0.262362	FALSE

## Sheet: table3B
geneR1A_uniq	num_onts	sub_col	chi2_pval_adj_scZ	perm_pval_adj_scZ	max_abs_median_scZ	perm_cdf_scZ	chi2_pval_adj_svd_z0	perm_pval_adj_svd_z0	max_abs_median_svd_z0	perm_cdf_svd_z0	chi2_pval_adj_svd_z1	perm_pval_adj_svd_z1	max_abs_median_svd_z1	perm_cdf_svd_z1	chi2_pval_adj_svd_z2	perm_pval_adj_svd_z2	max_abs_median_svd_z2	perm_cdf_svd_z2	f0	f1	f2	gene_max_diff	sig
PRDX5	4		0	0	0.243135	1	0	0	2.64654	1	7.39512e-07	0.0614286	1.14827	0.98	0	0	0.974125	1	0.590289	0.230079	0.128742	0.478779	FALSE
SVIL	3		4.8432e-13	0	0.542003	1	0.00841229	0	2.29356	1	0.000859638	0	0.511637	1	0.166243	0	0.285032	1	0.70378	0.11054	0.0965015	0.352152	TRUE
RPL10A	4		0.0751208	0	0.0228013	1	1		0.0971998		1		0.0704158		0	0	1.13769	1	0.64738	0.298037	0.0330771	0.00310688	FALSE
RPL10	4		0	0	0.329798	1	1		2.09569		1		0.235682		0	0	0.325864	1	0.750315	0.124694	0.108038	0.10107	FALSE
RPL11	4		1.30721e-12	0	0.0405421	1	0.201669	0	1.70822	1	0	0	1.63977	1	1		0.0440778		0.689154	0.260046	0.0264883	0.0485927	FALSE
RPL12	4		0	0	0.121186	1	0	0	5.43843	1	0	0	0.929757	1	0	0.0535211	0.121579	0.98	0.864459	0.101201	0.0149746	0.070529	FALSE
RPL13A	4		0	0	0.142483	1	1		0.48074		1		1.6136		1		0.00204004		0.795938	0.169235	0.00676286	0.116869	FALSE
RPL13	4		0	0	0.120598	1	1		0.987209		1		0.835623		1		2.76027		0.491271	0.236355	0.15257	0.109584	FALSE
RPL14	4		8.83085e-10	0	0.0702372	1	0	0	1.31632	1	0	0	2.71695	1	0.000568151	0	0.0777809	1	0.444758	0.386012	0.0892542	0.134195	FALSE
RPL17	4		7.44167e-09	0	0.0629986	1	1		0.0589394		1		0.181374		1		0.261607		0.755768	0.164666	0.0325021	0.110909	FALSE
REX1BD	4		0.00752921	0	0.217563	1	1		1.73057		1		0.00244918		1		0.0273047		0.797029	0.169396	0.0179104	0.118504	FALSE
RPL18A	4		1.59324e-09	0	0.118646	1	1		2.6308		1		0.203323		1		0.211653		0.570975	0.206104	0.181168	0.0742119	FALSE
RPL19	4		0	0	0.149205	1	1		0.105202		1		0.161455		1		0.0146551		0.309073	0.164891	0.134371	0.000864542	FALSE
RPL21	4		0.000140381	0	0.0541346	1	0	0	3.7371	1	0.000475208	0	0.206911	1	0.0968841	0	0.0539091	1	0.748516	0.14797	0.0706947	0.00310411	FALSE
RPL23A	4		0	0	0.0943102	1	1		1.05121		1		2.06066		1		0.031166		0.500189	0.425696	0.0675443	0.0142727	FALSE
RPL23	4		5.47549e-08	0	0.0346756	1	1		2.18584		1		0.0303194		1		0.162138		0.940477	0.030017	0.0180516	0.0131457	FALSE
RPL24	4		0	0	0.21142	1	1		2.12405		1		0.0209672		1		0.0316036		0.956412	0.021378	0.00615904	0.0287119	FALSE
RPL27	4		0	0	0.256958	1	0	0	2.95199	1	1.26325e-06	0	0.398763	1	0	0	0.19205	1	0.593403	0.335389	0.0604896	0.121902	FALSE
RPL28	4		0.00955478	0	0.0426481	1	1		2.01164		1		0.719067		1		0.00292056		0.573073	0.345998	0.0196223	0.000937409	FALSE
RPL30	4		2.36863e-10	0	0.0405599	1	0	0	2.46302	1	0	0	0.590899	1	0	0	0.95769	1	0.668563	0.106546	0.0761932	0.0422398	FALSE
RPL32	4		0	0	0.182728	1	1		0.617891		1		2.09004		1		0.0411197		0.494513	0.423651	0.0376674	0.241332	FALSE
RPL18	4		9.30909e-13	0	0.0708071	1	0	0	3.31649	1	1.24574e-15	0	0.468103	1	0	0	1.37109	1	0.698802	0.101812	0.0850321	0.0595963	FALSE
RPL34	4		0	0	0.195065	1	1		3.14227		1		0.0706662		1		0.0213545		0.943364	0.0441332	0.00527853	0.156826	FALSE
RBP7	3		0.00767646	0	0.115262	1	1		2.15042		1		0.140165		1		0.0100177		0.935444	0.0593765	0.00269147	0.0376215	FALSE
RARRES2	4		0.0104024	0	0.475432	1	1		2.10576		1		0.197047		1		0.188521		0.91707	0.03536	0.0281984	0.531802	FALSE
NFKBIA	4		6.21375e-08	0	0.247587	1	1		0.691604		1		1.1746		0.0093848	0.0279412	0.0885302	0.99	0.556027	0.323119	0.0894796	0.256381	FALSE
NME2	4		7.97003e-13	0	0.132108	1	1		2.15966		1		0.0641866		1		0.0268958		0.935912	0.0384092	0.0115165	2.77556e-17	FALSE
NOP53	4		3.98635e-14	0	0.0600785	1	0	0	2.42611	1	0	0.159588	0.623369	0.94	0	0	0.335735	1	0.705437	0.0995958	0.0840678	0.0830799	FALSE
TALDO1	4		6.32168e-05	0	0.130496	1	1		0.496346		1		1.88005		1		0.00198002		0.736982	0.256768	0.00449699	0.0254862	FALSE
NUCB2	4		0.000554197	0	0.128797	1	1		1.07665		5.17708e-11	0.137234	1.08286	0.95	7.31547e-12	0	0.945017	1	0.447065	0.240806	0.185269	0.00943346	FALSE
OAZ1	4		0	0	0.150241	1	1		1.7386		1		0.165219		1		0.00208125		0.613314	0.18284	0.0606053	0	FALSE
PFDN5	4		0	0	0.167355	1	0	0	2.07931	1	0	0	0.781759	1	2.07925e-13	0	0.339621	1	0.539678	0.286697	0.0791206	0.0389306	FALSE
PLIN2	3		0	0	0.571372	1	0	0	2.15093	1	0	0	1.12554	1	0.158735	0	0.242333	1	0.674913	0.165411	0.0832469	0.102584	TRUE
PNRC1	3		7.89343e-14	0	0.788019	1	0	0	2.01546	1	1		0.663584		1		0.332183		0.551898	0.147954	0.12475	0.520416	TRUE
RBM39	3		8.07392e-12	0	0.260995	1	0	0	1.42705	1	1		1.0557		0.182956	0	0.344072	1	0.4564	0.220551	0.0735304	0.0668352	FALSE
POMP	4		0.0385132	0	0.0442333	1	1		1.66958		1		0.186174		1		0.0238092		0.566936	0.395694	0.0235783	0	FALSE
PRDX1	4		5.64733e-14	0	0.158765	1	1		1.87345		1		0.015082		1		0.00878734		0.898986	0.0565862	0.0379905	0.059982	FALSE
unknown_chr7_67900000	3		1.86035e-08	0	0.821727	1	0.0966346	0.0299048	0.253115	0.99	3.71124e-10	0	0.663602	1	0.0147653	0	0.353492	1	0.225348	0.160565	0.113473	0	TRUE
PSAP	2		0	0	1.10508	1	0	0	1.29374	1	8.04425e-05	0.137234	0.607379	0.95	0	0	1.37485	1	0.72158	0.145911	0.0719686	0	TRUE
PSMA3	4		0.00631251	0	0.192019	1	1		0.866327		1		1.3545		1		0.0684692		0.582839	0.255595	0.101045	0.0871349	FALSE
PSMA7	4		0.162416	0	0.0346627	1	1.26847e-05	0.0299048	2.61117	0.99	1		0.076827		1		0.228393		0.927029	0.0348229	0.0262123	0.0243813	FALSE
PSME2	4		1.22472e-14	0	0.131004	1	0.0291595	0.081913	2.54253	0.97	1		0.0963824		1		0.224125		0.924694	0.0277753	0.0194235	0.0382133	FALSE
PTMA	4		0	0	0.127554	1	7.24544e-11	0	2.43218	1	0	0	0.456947	1	0.233836	0	0.123893	1	0.900605	0.0548951	0.0284876	0.177241	FALSE
PTPRE	3		0.107909	0	0.138576	1	2.7263e-14	0	1.3598	1	0.209528	0	0.148616	1	0	0	1.47312	1	0.426022	0.174998	0.169852	8.32667e-17	FALSE
RACK1	4		0	0	0.186864	1	1		3.12443		1		0.272602		1		0.490223		0.713485	0.126481	0.0561565	0.218031	FALSE
PPP1R12A	3		0	0	0.549735	1	0	0	2.13032	1	0	0	1.45261	1	2.32801e-06	0	0.407796	1	0.419103	0.208054	0.128647	0.0955526	TRUE
SPATS2L	4		9.33557e-12	0	0.2344	1	3.72482e-06	0	2.8578	1	1		0.0291542		1		0.171764		0.875921	0.0625397	0.0229533	0.427197	FALSE
RPL35A	4		0	0	0.243093	1	0	0	3.21036	1	0.0168217	0	0.141403	1	0	0.0279412	0.15135	0.99	0.91021	0.0524802	0.0154756	0.0110956	FALSE
RPL36A-HNRNPH2	4		0	0	0.106946	1	1		0.136829		1		1.5718		1		0.0934905		0.612888	0.219449	0.123627	0.124449	FALSE
RPS2	4		0	0	0.0714626	1	1		0.126472		1		0.35815		1		1.66874		0.698887	0.151416	0.0604219	0.142097	FALSE
RPS3	4		4.925e-14	0	0.0994956	1	1		0.438443		1		1.51475		1		0.490029		0.726174	0.0963574	0.0760893	0.0694668	FALSE
RPS4X	4		0	0	0.208907	1	1		0.314399		1		0.386297		1		0.0489266		0.372215	0.320699	0.153276	0.0352194	FALSE
RPS5	4		0	0	0.162182	1	1		2.62241		1		0.326605		1		0.0979612		0.708096	0.230105	0.0313449	0.211397	FALSE
RPS6	4		0	0	0.145077	1	1		0.300463		1		0.07206		1		1.40761		0.666391	0.214487	0.0733074	0.271608	FALSE
RPS7	4		0	0	0.340167	1	3.12036e-10	0	0.915831	1	1		0.0151163		1		0.0837864		0.878825	0.0970714	0.00642714	0.0911813	FALSE
RPS8	4		0	0	0.0559085	1	0	0	3.06499	1	0	0	0.412593	1	0	0	0.732223	1	0.793874	0.118504	0.0523917	0.00734405	FALSE
RPSA	4		0	0	0.0853094	1	1		0.494788		1		1.29519		1		0.958483		0.693931	0.150414	0.126343	0.0347403	FALSE
SSR4	4		0	0	0.269813	1	0	0	3.67618	1	0	0	1.42662	1	1		0.033258		0.874005	0.116262	0.00951864	0.0538155	FALSE
RPS28	4		0	0	0.349118	1	0	0	2.75449	1	0	0	0.322298	1	1		0.00324905		0.993296	0.00623327	0.00047041	0.0354779	FALSE
S100A6	4		0	0	0.103286	1	1		0.638448		1		2.40631		1		0.0537617		0.68546	0.29998	0.00464696	0.0146848	FALSE
SELENOH	4		0.00209109	0	0.189797	1	1		0.860394		1		1.02626		1		0.0681182		0.604882	0.331042	0.0425395	0	FALSE
SEPTIN7	4		2.82828e-05	0	0.327701	1	0.852726		2.52144		3.11791e-05	0.219057	0.381501	0.91	0.610861		0.423111		0.725802	0.092972	0.0494543	0.0234885	FALSE
SRRM2	4		0.00748927	0	0.209498	1	1		1.23623		1		0.249545		1		0.099372		0.59556	0.315252	0.0379674	0	FALSE
SFTPC	2		0.103409	0	0.186148	1	0	0	3.34971	1	0	0	0.890458	1	1.31186e-12	0	0.603077	1	0.49789	0.0817868	0.0738717	0.213521	FALSE
SLMO2-ATP5E	4		0	0	0.121531	1	1		1.4588		1		0.0406023		1		2.92016e-15		0.979099	0.0209009	5.91592e-30	0.0084505	FALSE
SNHG12	3		0.134804	0	0.309948	1	1		1.61632		1		0.770686		1		0.0769844		0.483101	0.265879	0.122337	0.345458	FALSE
SNHG5	4		0.0747313	0	0.138661	1	0.0038279	0	1.45116	1	0.694995		0.239262		1		0.131373		0.481152	0.177826	0.11088	0.0601355	FALSE
SNHG6	4		2.72619e-11	0	0.228484	1	1.38544e-10	0	1.34126	1	2.21367e-05	0.0869663	0.434113	0.97	1.31639e-11	0	0.402714	1	0.574407	0.278053	0.112646	0.223325	FALSE
SNHG8	4		0	0	0.657881	1	1		1.75305		0	0	0.40904	1	0.62279		0.0781597		0.811637	0.159574	0.0153621	0.0275994	TRUE
SRSF5	4		0.0056705	0	0.190003	1	1		2.28509		1		0.106995		1		0.00246929		0.894407	0.0612069	0.0303918	0.189019	FALSE
RPL35	4		1.10176e-05	0	0.129274	1	1		0.179385		1		1.81351		1		0.0217389		0.577792	0.170444	0.094771	0.112258	FALSE
RPS27	4		0	0	0.109936	1	1		1.40662		1		0.168352		1		0.00166184		0.890065	0.0977921	0.0102694	0.123614	FALSE
RPS24	4		0	0	1.7117	1	0	0	1.61706	1	0	0	1.95668	1	0	0	1.81766	1	0.408704	0.303565	0.126184	0.0586393	TRUE
RPL36	4		0	0	0.240698	1	1		2.30811		1		0.0752815		1		0.01423		0.931843	0.0361211	0.0246195	0.378757	FALSE
RPL37A	4		0.12126	0	0.0142892	1	1		2.36757		1		0.0283168		1		0.0180331		0.973695	0.0150155	0.00367024	0.015061	FALSE
RPL37	4		0	0	0.20879	1	1		1.32047		1		1.71895		1		0.00102952		0.620501	0.36964	0.00429235	0.198057	FALSE
RPL38	4		2.57489e-08	0	0.0672145	1	2.7611e-10	0	1.4622	1	0	0	0.5368	1	0.00437426	0	0.090924	1	0.560242	0.409802	0.0170204	0.0501503	FALSE
RPL3	4		0	0	0.102916	1	1		0.691514		1		1.09145		1		0.993652		0.498483	0.233882	0.17174	0.0115493	FALSE
RPL6	4		0	0	0.170934	1	1		1.95473		1		0.0202378		1		0.00290797		0.686519	0.140194	0.0663045	0.00460319	FALSE
RPL7A	4		3.63043e-14	0	0.0751297	1	1		0.16342		1		2.03992		1		0.0305332		0.762794	0.14386	0.0527862	0.0856719	FALSE
RPL8	4		0	0	0.236808	1	1		0.503775		1		0.40991		1		1.70492		0.365597	0.274467	0.112935	0.00758084	FALSE
RPLP1	4		0	0	0.109813	1	1		2.82408		1		0.032402		1		0.0550535		0.967718	0.0102253	0.00776998	0.183704	FALSE
RPS27A	4		0	0	0.39107	1	0	0	3.05011	1	0	0	1.32703	1	1		0.00212399		0.895793	0.0962394	0.00279184	0.0622353	FALSE
RPLP2	4		0	0	0.141034	1	0	0	4.89068	1	0	0	1.31968	1	0.000582193	0	0.072567	1	0.920844	0.0695867	0.0051114	0.186605	FALSE
RPS11	4		0	0	0.174359	1	0	0	3.06094	1	0.0784189	0	0.290143	1	0	0	0.839202	1	0.603568	0.349971	0.033584	0	FALSE
RPS12	4		0	0	0.233263	1	3.56656e-07	0	0.753266	1	1.06854e-11	0	0.636363	1	0	0	0.831246	1	0.857353	0.106334	0.0158323	0.12052	FALSE
RPS13	4		0	0	0.22278	1	1		2.70831		1		0.0551257		1		0.000566668		0.923172	0.0200791	0.0164432	0.351476	FALSE
RPS14	4		0	0	0.220801	1	1		1.01506		1		2.49915		1		0.0193282		0.755777	0.208914	0.0101414	0.0910793	FALSE
RPS15A	4		0	0	0.10384	1	0	0	2.89569	1	0	0	0.949412	1	2.19771e-11	0	0.0698505	1	0.88074	0.094436	0.012188	0.0602826	FALSE
RPS16	4		0	0	0.262582	1	1		2.77919		1		0.0874895		1		0.0237312		0.944699	0.0457242	0.00370841	0.0303418	FALSE
RPS19	4		0	0	0.316649	1	0	0	3.48785	1	0	0	1.43843	1	0	0	0.732483	1	0.725614	0.0758594	0.0652612	0.41838	FALSE
RPS20	4		0	0	0.21021	1	0	0	3.54151	1	1.56476e-05	0	0.126857	1	0	0	0.214151	1	0.946857	0.0479914	0.0051514	1.47451e-17	FALSE
RPS21	4		0	0	0.208159	1	1		2.34405		0	0	0.39238	1	0	0	0.138228	1	0.924644	0.0283278	0.0242548	0.398326	FALSE
RPS10	4		0.000663473	0	0.141747	1	1		0.359156		1		1.39039		1		0.0111647		0.564751	0.377375	0.0307556	0.0399187	FALSE
NDUFV2	4		0.000136276	0	0.0451495	1	1		2.24936		1		0.293171		1		0.0776619		0.910533	0.0595057	0.0227886	0.00466413	FALSE
NEXN	2		0.00124534	0	0.811384	1	0	0	1.29887	1	4.41965e-13	0	2.26545	1	1		0.387448		0.395001	0.2757	0.198747	1.20016	TRUE
NDUFB8	4		9.28646e-06	0	0.162222	1	1		1.75764		1		0.145119		1		0.0068042		0.59336	0.227901	0.0916538	0.04611	FALSE
COPE	4		0.00212892	0	0.129615	1	4.98294e-15	0	2.06523	1	1		0.0567795		1		0.0778338		0.768427	0.171867	0.0285342	0.0905192	FALSE
COX17	3		0.00830462	0	0.585661	1	1		0.0585133		1		0.127195		0.570483		0.287379		0.851049	0.0889072	0.0486688	0.874318	TRUE
COX4I1	4		0	0	0.163108	1	1		3.22119		1		0.0371334		1		0.0163875		0.971229	0.017613	0.00473909	2.77556e-17	FALSE
COX5B	4		0.0615834	0	0.150194	1	0	0	1.17541	1	0	0	2.61858	1	0.939433		0.104845		0.51079	0.401205	0.0527086	0.00974252	FALSE
COX7A2	4		3.9628e-08	0	0.112457	1	1		1.94174		0	0	0.781685	1	1		0.0764242		0.840995	0.112355	0.0248469	0.0562399	FALSE
UBA52	4		0	0	0.10568	1	1		0.499886		0	0	2.29373	1	1		0.00391825		0.80413	0.16178	0.0142861	0.0346109	FALSE
CYBA	4		4.80417e-10	0	0.137527	1	1		1.73961		1		1.40023		1		0.0675021		0.685028	0.197626	0.0528866	0.141515	FALSE
DAD1	4		0.00159082	0	0.226907	1	0	0.0299048	2.80339	0.99	1		0.0809089		1		0.0505947		0.916827	0.0391437	0.0348811	0.0653108	FALSE
COMMD6	4		0	0	0.165631	1	1		1.1718		0	0	1.83892	1	1		0.0690585		0.586425	0.318663	0.0788169	0	FALSE
DBI	4		0.0128921	0	0.296255	1	1		0.656875		1		1.32067		1		0.0660262		0.71346	0.262983	0.018348	0.116113	FALSE
DNAAF1	2		0.000164692	0	0.794281	1	0.00017535	0	0.577997	1	1		0.541306		1		0.131447		0.619325	0.335574	0.0451011	0	TRUE
TPT1	4		0	0	0.180964	1	0	0	5.0093	1	0	0.0318519	0.519445	0.99	0.000478043	0	0.116322	1	0.68431	0.111911	0.0697988	0.287899	FALSE
EDF1	4		0	0	0.22591	1	1		2.0942		1		0.141609		1		0.0161239		0.948967	0.0416688	0.00764478	0	FALSE
TPM3	3		0	0	0.703695	1	0	0	2.49551	1	0	0	1.76883	1	0.644372		1.08465		0.518444	0.267998	0.11373	0.684296	TRUE
NDUFS8	4		0.0543684	0	0.19256	1	1		1.43325		1		0.402259		1		0.0218735		0.53625	0.416934	0.0404073	0.137387	FALSE
EEF1G	4		0	0	0.140012	1	1		0.171881		1		1.73114		1		0.158639		0.352113	0.230072	0.170341	0	FALSE
EIF1	4		0	0	0.152372	1	1		0.169557		1		1.37465		1		0.0320799		0.593826	0.271062	0.0378758	0	FALSE
EIF3G	4		5.82049e-09	0	0.229179	1	1		1.74568		1		0.0975402		1		0.0136074		0.724082	0.154098	0.0884696	0	FALSE
TXN	4		0.000158052	0	0.112514	1	1		1.90346		0	0	1.14291	1	1		0.196177		0.624717	0.271817	0.0809818	0.0704625	FALSE
CLU	4		0.000133211	0	0.138988	1	0	0	5.3159	1	0	0	0.556787	1	7.9128e-10	0	0.242091	1	0.893834	0.0310311	0.0243262	0.0777738	FALSE
UQCRB	4		0	0	0.250261	1	0	0	3.47722	1	1		0.130646		0	0	0.210121	1	0.859916	0.119412	0.0187455	0.119654	FALSE
CIR1	3		0	0	1.06314	1	0	0	2.41736	1	0	0	0.540477	1	1		0.31289		0.728152	0.192838	0.0459285	1.07426	TRUE
AKAP13	4		0.00129807	0	0.444432	1	2.78376e-06	0.081913	1.81732	0.97	0.00649792	0.433613	0.403631	0.8	1		0.0404419		0.564654	0.090031	0.0704629	0	FALSE
AKR1A1	4		0.00900489	0	0.222893	1	1		2.02328		1		0.501447		1		0.0651799		0.496622	0.45046	0.0308523	0	FALSE
ARHGAP18	3		0.0403796	0	0.243612	1	1		2.22826		1		0.0530917		1		0.228679		0.789889	0.0856496	0.038101	0.316641	FALSE
ARL6IP1	4		0.00832065	0	0.152557	1	1		1.44385		1		0.476095		1		0.0829044		0.659377	0.155757	0.0995759	0.0216919	FALSE
ARPC2	4		4.53685e-08	0	0.220837	1	0	0.856364	3.52732	0.42	1		0.528504		1		0.236889		0.646336	0.134898	0.0911388	0.200489	FALSE
ATP5F1C	4		0	0	2.28665	1	0	0	3.24581	1	0	0	0.821367	1	2.65445e-11	0	0.404616	1	0.868232	0.0842305	0.0332171	1.57396	TRUE
ATP5MG	4		0	0	0.269898	1	1		3.77585		1		0.00652605		1		0.00280359		0.977385	0.0133105	0.00394826	0.452368	FALSE
ZFAS1	4		1.03305e-15	0	0.148397	1	0.451103		1.5451		0	0	0.390487	1	0.595212		0.21473		0.599847	0.214618	0.0937035	0.0780752	FALSE
ATP5PD	4		6.42437e-06	0	0.0901854	1	1		1.85052		1		0.413146		1		0.105822		0.771317	0.127853	0.0548516	0.0175559	FALSE
ATP5PO	4		1.00075e-08	0	0.100464	1	0	0	2.57474	1	0	0	0.493107	1	0	0	0.825485	1	0.685327	0.187553	0.0892623	0.0971402	FALSE
BAZ1A	3		0.0705978	0	0.345719	1	1		0.052706		1		0.00589122		1		0.0191298		0.459072	0.216947	0.175798	0	FALSE
BLVRB	3		0.161483	0	0.144285	1	1		2.23547		1		0.249262		1		0.0254356		0.76354	0.181338	0.0276793	0	FALSE
C19orf33	4		5.34905e-06	0	0.349249	1	1.29741e-08	0	0.532294	1	0.254316	0	0.369974	1	1		1.26752e-16		0.903475	0.096525	2.00927e-32	0.164451	FALSE
C3	3		0	0	0.181769	1	0	0	2.93842	1	1		0.061478		0.00478945	0.11875	0.167699	0.95	0.497068	0.22528	0.168211	0.027781	FALSE
CALM1	4		0	0	0.0932	1	1		0.901467		1		1.21492		9.92977e-08	0	0.303104	1	0.555517	0.21366	0.0670085	0.146663	FALSE
CAST	4		4.1656e-06	0	0.182595	1	0	0	2.78039	1	0	0	1.35218	1	7.61272e-05	0	0.335793	1	0.583054	0.0975243	0.0654302	0.0607345	FALSE
CD47	4		0	0	1.11762	1	0	0	1.70985	1	0	0	2.2648	1	1		0.0764202		0.637818	0.283074	0.0365342	0.0378404	TRUE
CD55	4		7.79442e-10	0	0.237657	1	1		1.26462		0.482879		0.245398		0.932872		0.412552		0.435354	0.282051	0.12137	0.0929675	FALSE
CD63	4		0	0	0.168781	1	0	0	3.81211	1	0	0	0.933231	1	0	0	0.398404	1	0.736182	0.128778	0.0477722	0.103313	FALSE
FABP4	4		0.00439266	0	0.103736	1	1		2.15517		1		0.204555		4.10761e-05	0	0.0659553	1	0.798774	0.133129	0.021792	0.0041893	FALSE
FABP5	4		0	0	0.216624	1	1		2.3118		1		0.00368387		1		0.00351068		0.971444	0.0217503	0.00632594	0.0418703	FALSE
EEF1B2	4		0	0	0.135166	1	1		0.228727		0	0	1.56721	1	0	0	0.427328	1	0.847328	0.137071	0.00985503	0.0174512	FALSE
FCGRT	4		3.97153e-07	0	0.133031	1	0	0	3.22671	1	1		0.0472188		1		0.0376063		0.620191	0.317296	0.0395087	0	FALSE
LAMTOR2	4		0.0954801	0	0.103153	1	1		1.4944		1		0.00122433		1		0.116927		0.729827	0.143508	0.121514	0	FALSE
LMNA	4		1.6775e-07	0	0.132995	1	1		2.22164		1		0.32382		0.398014		0.259601		0.456914	0.145339	0.0705741	0.148535	FALSE
LRRFIP1	4		0.000272874	0	1.01153	1	0	0	2.87953	1	0	0	1.38883	1	0.000686859	0	0.749329	1	0.624573	0.186469	0.0770841	0.959543	TRUE
FAU	4		0	0	0.0700414	1	0	0	2.25809	1	0	0	0.43729	1	1		0.0289669		0.959639	0.0349939	0.0024944	0.0837892	FALSE
LUC7L3	4		0	0	0.821486	1	0	0.0299048	2.60596	0.99	6.1904e-05	0	0.896952	1	1		0.13536		0.738876	0.118487	0.0333956	0.0321023	TRUE
TNFAIP2	2		9.19689e-05	0	0.371766	1	0.0882294	0	0.387468	1	1		0.191497		1		0.190885		0.334464	0.239123	0.205019	0.185505	FALSE
TMSB4X	3		0	0	1.10749	1	0	0	2.02675	1	4.57434e-13	0	0.264164	1	5.60581e-13	0	0.572986	1	0.609995	0.17161	0.0684486	0.137706	TRUE
MGST3	4		0	0	0.178742	1	0.0211948	0	1.02321	1	0	0	1.30542	1	1		0.071921		0.676357	0.177657	0.0520786	0.00985391	FALSE
KRTCAP2	4		1.74126e-13	0	0.223405	1	1		2.23868		1		0.813455		1		0.042593		0.722384	0.234326	0.0226102	4.16334e-17	FALSE
TMEM258	4		0.00591004	0	0.100884	1	1		1.75809		1		0.093419		1		0.0175375		0.650915	0.27585	0.037777	0.126673	FALSE
MTUS1	2		0.00375641	0	0.271112	1	1		0.951595		1		1.08628		1		0.163198		0.638695	0.175449	0.14303	0.302331	FALSE
MYL6	4		0	0	1.27695	1	0	0	1.34462	1	0	0	1.84945	1	0	0	0.87662	1	0.489454	0.319808	0.13052	1.37083	TRUE
NACA	4		0.0323457	0	0.140643	1	1		0.0383467		1		0.0319831		1		0.271972		0.733883	0.207509	0.0175539	0.0409327	FALSE
NDUFA11	4		0.0256478	0	0.0386044	1	0	0	3.39472	1	0	0	1.27965	1	1		0.0205825		0.849955	0.144889	0.00295515	0.0645313	FALSE
NDUFA4	4		0	0	0.144417	1	0	0	4.25023	1	0	0	1.53821	1	6.82386e-13	0	0.0449393	1	0.867101	0.127943	0.00385085	0.0387559	FALSE
NDUFAB1	4		0.0109727	0	0.118666	1	1		1.4129		1		1.03599		1		0.0502876		0.651538	0.303957	0.0355185	0.132798	FALSE
TFF3	2		0.0408452	0	0.135214	1	1		2.58954		1		0.00425018		1		0.00189829		0.980965	0.0163001	0.00273493	0.0567185	FALSE
NDUFB2	4		2.26034e-07	0	0.132295	1	6.895e-15	0	3.15429	1	1		0.0169301		1		0.0436945		0.900189	0.0775168	0.00867521	0.0753289	FALSE
MT1X	4		0.0167447	0	0.179956	1	1		1.41958		1		0.0114283		1		0.0900284		0.732433	0.221219	0.0463485	0.04596	FALSE
KMT2E	3		0.000203494	0	0.125934	1	1.77955e-09	0	2.38588	1	1.24574e-15	0	0.579508	1	6.81277e-09	0.0279412	0.336641	0.99	0.596039	0.160403	0.111676	0.18428	FALSE
SOD1	4		0	0	0.264873	1	0	0	2.55952	1	0	0	1.07976	1	1.65015e-09	0.0535211	0.294069	0.98	0.641755	0.234675	0.0780402	0.00820715	FALSE
IRF1	3		0	0	0.505142	1	0	0	0.49738	1	1		0.425642		1		0.262165		0.662201	0.133652	0.113692	0.0478204	TRUE
FTH1	4		0.000153934	0	0.0290747	1	1		1.96867		1		0.893857		1		2.63181		0.163384	0.137558	0.113705	0.0320643	FALSE
GAS5	4		0	0	0.162234	1	1		2.06068		1		0.0942335		1		0.310058		0.622793	0.174189	0.108579	0.16463	FALSE
GSTO1	4		0	0	0.431908	1	0	0	2.9805	1	0	0	1.01374	1	0	0	0.767336	1	0.554336	0.222921	0.16183	0.102089	FALSE
HNRNPDL	4		0.00122105	0	0.351927	1	1		2.16547		1		0.235136		1		0.127084		0.792169	0.0946738	0.0693461	0.14894	FALSE
HPGD	3		0.00188716	0	0.297527	1	0	0	3.1711	1	0	0	1.07716	1	4.46055e-09	0	0.319532	1	0.609191	0.270517	0.0666842	0	FALSE
HSP90AB1	4		1.93623e-13	0	0.23771	1	0.0353205	0	0.306784	1	0.802158		0.29435		0	0	2.21739	1	0.418404	0.329939	0.187723	0.0467684	FALSE
HEXB	4		3.97153e-07	0	0.138967	1	1		0.223645		0	0	1.73347	1	0	0.076	0.568429	0.97	0.490833	0.229588	0.157872	0	FALSE
HYI	2		0.00338975	0	0.508796	1	0.000334616	0.0560714	1.15677	0.98	0.262353	0.310556	0.601617	0.87	1		0.105558		0.771508	0.155231	0.073261	0.149754	TRUE
HSPB1	4		0.00124534	0	0.0649759	1	1		1.61316		1		0.00633687		1		0.0090235		0.853895	0.0469706	0.0266927	0	FALSE
HSP90B1	4		3.28901e-05	0	0.30199	1	1		1.3989		1		0.526416		1		0.111109		0.747961	0.220028	0.018959	0.11584	FALSE
NDUFB7	4		0.0367405	0.0243243	0.0983009	0.99	1		1.54602		1		0.00958686		1		0.00395663		0.847478	0.105993	0.0465289	0.0266547	FALSE
CCNL1	3		0.00529258	0.0243243	0.22384	0.99	1		0.819341		1		1.01428		1		0.342693		0.568983	0.164238	0.117519	0.419246	FALSE
SUGT1	3		0.130572	0.0243243	0.232588	0.99	1		1.66623		1		0.133112		1		0.839103		0.523121	0.233528	0.16285	0.34203	FALSE
CSNK1A1	4		0.0244231	0.0243243	0.381748	0.99	0.000161989	0.0560714	1.95754	0.98	1		0.226986		1		0.292191		0.66493	0.087571	0.0747941	0.0917042	FALSE
HNRNPA1	4		0.00902639	0.0243243	0.219627	0.99	0	0	1.16521	1	6.88565e-11	0.0614286	0.970507	0.98	1		0.0497725		0.523669	0.293276	0.1276	0.0725191	FALSE
DNAJA1	3		0.0238152	0.0243243	0.286198	0.99	1		0.577284		0.135467	0.811452	1.17638	0.61	5.93224e-07	0	0.326152	1	0.768077	0.137811	0.0397147	0.259404	FALSE
DPP7	4		7.89992e-14	0.0243243	0.35572	0.99	2.78137e-11	0.10735	0.989121	0.96	0	0	1.23249	1	0	0	0.402532	1	0.611704	0.347146	0.0225456	0.213789	FALSE
GUK1	4		0.000248366	0.0243243	0.358056	0.99	0.235015	0.0299048	1.49591	0.99	1		0.31785		1		0.0409423		0.71114	0.231685	0.0273046	0.128677	FALSE
ARPC3	4		0.0275342	0.0243243	0.122813	0.99	1		3.37527		1		0.408647		1		0.168324		0.836907	0.102539	0.0451517	0	FALSE
unknown_chr17_29500000	3		0.0226462	0.0243243	0.615408	0.99	1		0.110348		1		0.369567		0.74197		0.31427		0.156765	0.151517	0.135844	0.451117	TRUE
SEC61G	4		0	0.0243243	0.562897	0.99	0	0	2.5305	1	1		0.2269		6.82386e-13	0	0.440627	1	0.782427	0.176816	0.0311111	0.131576	TRUE
CTSC	2		0.00249996	0.0478723	0.424664	0.98	1		0.399075		1		0.360576		1		0.074331		0.794147	0.114061	0.0676476	0.972673	FALSE
TAF10	4		0.155685	0.0478723	0.126928	0.98	1		1.815		1		0.0129413		1		0.00921483		0.908663	0.0679182	0.0234188	0.0884348	FALSE
NCOR1	3		3.45193e-05	0.0478723	0.532216	0.98	0	0	2.39557	1	0.693509		0.353192		1		0.00979647		0.780261	0.15578	0.0259668	0.0923047	TRUE
CHCHD2	4		0	0.0703125	0.421101	0.97	0	0.259699	4.65384	0.89	0	0.0869663	0.417567	0.97	0.0820445	0.076	0.0390411	0.97	0.985806	0.00836139	0.00467973	0.0513963	FALSE
ITM2B	4		0.00902639	0.0703125	0.172335	0.97	1		2.00754		1		0.670706		1		0.239386		0.691325	0.228126	0.0702495	0.102687	FALSE
CARD16	3		0.134432	0.0703125	0.263147	0.97	1		0.848676		1		0.445608		1		0.147536		0.527216	0.246047	0.156024	0.0593133	FALSE
CHD2	3		0.0133296	0.0703125	0.393056	0.97	0.151586	0.541379	1.64727	0.75	1		0.528422		0.398014		0.680574		0.497883	0.169806	0.131589	0.379981	FALSE
PABPN1	4		0.0883191	0.0927835	0.0955934	0.96	1		2.10084		1		0.112094		1		0.0453862		0.922435	0.0650399	0.0108307	0.154351	FALSE
METTL5	4		0.143172	0.0927835	0.233789	0.96	1		1.48105		1		0.0630519		1		0.122551		0.491153	0.206	0.143413	3.90313e-17	FALSE
GNG5	4		0.0114153	0.114796	0.244873	0.95	1		2.57783		1		0.0815534		1		0.045773		0.878841	0.0995089	0.0135377	0.202729	FALSE
HP1BP3	2		0.100967	0.114796	0.27973	0.95	1		1.47364		0.326437		0.237079		0.425844		0.329404		0.587428	0.191117	0.0964848	0.102019	FALSE
unknown_chrM_0	4		0.130111	0.133005	0.22546	0.94	1		0.164095		0	0	1.34312	1	0.00104601	0	0.30968	1	0.0838201	0.0589663	0.0507003	0.101113	FALSE
ATP5MPL	4		0.0226713	0.133005	0.284054	0.94	0.829215		2.45961		1		0.251496		1		0.0010644		0.811893	0.130467	0.0396467	0.0661417	FALSE
ASAP1	2		0.164856	0.133005	0.211638	0.94	1		1.82669		1		0.122245		1		0.0748694		0.767805	0.12492	0.0596868	0.00360817	FALSE
RFC1	4		0.0111082	0.133005	0.879226	0.94	0.00221589	0.0560714	1.7584	0.98	0.158089	0.178812	0.677341	0.93	1		0.239937		0.630488	0.17412	0.0729782	0.355354	FALSE
OSBPL8	3		0.0566845	0.133005	0.362755	0.94	1		0.88448		1		0.368428		0.185346	0.0974359	0.447525	0.96	0.38895	0.179007	0.15818	0.345719	FALSE
NSRP1	3		0.110801	0.133005	0.259557	0.94	1		1.62854		0.000701261	0	1.16324	1	0.534951		0.65028		0.429095	0.341811	0.124943	0.45848	FALSE
NDUFB11	4		0.106596	0.133005	0.106613	0.94	0.244641		0.087049		1		4.65896e-17		1		2.61294e-17		1	3.51503e-31	2.16467e-33	0.0223289	FALSE
MALAT1	3		0.0383436	0.153659	0.261789	0.93	1		1.81283		1		0.442004		1		0.0866619		0.446737	0.127477	0.0396402	0.438134	FALSE
CKLF-CMTM1	3		0.0883191	0.153659	0.495144	0.93	1		1.26401		1		0.455916		1		0.139453		0.611702	0.287765	0.0581276	1.45293	FALSE
SCGB1A1	2		0.0318386	0.173913	0.160323	0.92	0.50896		2.51383		1		1.66665		1		1.06522		0.550236	0.18113	0.138288	0.306813	FALSE
SNRPB	4		0.0982856	0.173913	0.194351	0.92	0.143813	0.10735	0.182114	0.96	1		0.00799634		1		0.0186002		0.696563	0.175859	0.127579	0.108223	FALSE
MORF4L1	3		0.0747313	0.192857	0.229262	0.91	1		2.31963		1		0.03758		1		0.00231993		0.83061	0.117221	0.0255437	0.451043	FALSE
CRELD2	2		0.0134439	0.192857	0.1748	0.91	0	0.0560714	2.73385	0.98	1		0.0963102		1		0.0335582		0.82961	0.140936	0.0210744	0.28219	FALSE
TMEM219	4		0.00801033	0.192857	0.273403	0.91	1		2.01734		1		0.0785635		1		0.0121024		0.945116	0.0318372	0.0152418	0.0807865	FALSE
YBX1	4		0.165237	0.212264	0.179204	0.9	0	0.662177	2.05986	0.69	1		0.382693		0	0.0535211	1.26351	0.98	0.715589	0.148063	0.104547	0.0562917	FALSE
TXNDC17	4		0.00685263	0.212264	0.30506	0.9	1		1.81216		1		0.332378		1		0.0360653		0.589618	0.31483	0.0414621	0.271051	FALSE
SRSF11	4		0.0973255	0.232394	0.272154	0.89	2.85416e-10	0.259699	2.27027	0.89	6.58699e-09	0.9675	0.412228	0.52	1		0.289973		0.703205	0.135995	0.104391	0.221527	FALSE
MGLL	4		0.000312048	0.252336	0.311864	0.88	1		0.0254047		1		0.00960964		1		0.0260013		0.684775	0.162392	0.0373927	0.247032	FALSE
RSF1	3		0.0275518	0.291667	0.365653	0.86	1.02357e-08	0.526993	3.0664	0.76	1		0.363129		1		0.0841645		0.895655	0.0555391	0.0282786	0.387459	FALSE
TMEM14B	4		0.0638879	0.291667	0.403016	0.86	1		0.338456		1		0.318147		1		0.160286		0.495821	0.138539	0.106242	0.46239	FALSE
EEA1	2		0.000132397	0.31106	0.905357	0.85	0.66797		0.834056		0.308876		0.320376		1		0.517537		0.535324	0.190628	0.168578	0.339899	FALSE
SFPQ	4		0.00497208	0.330275	0.124508	0.84	0.109135	0.174444	0.493436	0.93	2.00547e-10	0.178812	0.827436	0.93	1		0.0746474		0.549007	0.211091	0.110749	0.0137295	FALSE
TPM1	2		0.0411066	0.452055	0.840908	0.78	1		0.884973		0.851501		1.45907		1		0.531391		0.463818	0.285775	0.0864903	0.473027	FALSE
RPL22L1	3		0.00353921	0.470455	0.388122	0.77	1		0.179129		0.43857		0.324279		0.0574043	0.612903	0.217353	0.7	0.64442	0.210782	0.144798	0.365976	FALSE
UBE2D3	3		9.84171e-05	0.529412	0.489806	0.26	0	0.790199	2.0395	0.38	1		0.128002		0.0843339	0.280682	0.292058	0.13	0.816243	0.0804164	0.0427592	0.59795	FALSE
ADSL	2		0.0395027	0.567568	0.500908	0.72	6.41753e-06	0.341304	1.60812	0.85	1		0.773867		1		0.0490189		0.64601	0.287438	0.0440295	0	FALSE
DNAJC8	3		0.0831162	0.64574	0.290161	0.68	0	0.423121	2.32615	0.81	0	0.0869663	1.09145	0.97	1		0.00859924		0.841429	0.14689	0.00701433	0.0327131	FALSE
UQCR10	3		0.130111	0.763393	0.120197	0.62	0	0.277059	0.773918	0.88	1		0.169983		4.62635e-05	0.185366	0.174832	0.92	0.765969	0.151606	0.082425	0.231251	FALSE
DHX36	3		0.00630411	0.96	0.593451	0.52	1.35408e-07	0.71651	1.59379	0.66	1		0.195533		1		0.252681		0.590776	0.228604	0.108487	0.871276	FALSE
A2M	2		1		0.102549		1		0.0104144		1		0.0111514		1		0.015981		0.880638	0.0934986	0.0225635	0	FALSE
AAMDC	3		0.854721		0.19382		1		0.751156		1		1.25163		1		0.163603		0.464414	0.263746	0.107026	0.0143438	FALSE
ACTA2	2		1		0.131019		1		0.00972209		1		0.00921895		1		0.00199615		0.925376	0.0559644	0.00997119	2.77556e-17	FALSE
ADIRF	4		0.649798		0.229345		1		1.37138		1		0.277499		1		0.00921447		0.810781	0.178551	0.00787184	0.0436152	FALSE
ADRM1	4		1		0.39587		1		0.39748		1		0.0162288		1		1.94298e-16		0.950598	0.0494018	5.54682e-31	0	FALSE
AK1	2		1		0.150329		1		0.122743		1		3.54719e-17		1		2.62901e-18		1	9.75574e-32	2.22737e-63	0	FALSE
AKR1C3	4		0.223382		0.12948		1		1.24955		1		0.111682		1		0.0152317		0.853996	0.141014	0.00499042	0.0414471	FALSE
ALDOA	4		1		0.0394587		1		0.00120913		1		0.000197756		1		0.000362812		0.283985	0.171952	0.0615412	0	FALSE
ALG5	2		1		0.104828		1		0.0877559		1		0.0232521		1		3.13413e-17		0.986566	0.0134342	1.41162e-32	0	FALSE
ALKBH7	4		1		0.014929		1		0.0337105		1		0.052362		1		6.41824e-17		0.786686	0.213314	2.11983e-31	0	FALSE
ANP32B	4		1		0.206574		1		1.09249		1		0.327406		1		0.0631629		0.57885	0.262397	0.0709892	0	FALSE
ANXA11	3		1		0.0764969		1		0.100809		1		0.0865629		1		0.0676328		0.490401	0.457157	0.0524421	0.0647393	FALSE
ANXA1	4		1		0.221993		1		0.0318836		1		0.0642246		1		0.107381		0.823222	0.137762	0.0193299	0	FALSE
ANXA2	4		1		0.0621865		1		0.0028737		1		0.00292336		1		0.00139034		0.689897	0.227014	0.0382151	0	FALSE
ANXA5	2		1		0.276385		1		0.0540872		1		0.247468		1		0.0611161		0.750167	0.155767	0.0940666	0	FALSE
APLP2	4		1		0.104533		1		0.109202		1		0.0809367		1		0.0150486		0.29717	0.227002	0.189149	0.00807558	FALSE
APOC1	4		1		0.0303979		1		3.04486		1		0.241508		1		0.0113569		0.782499	0.0629922	0.0554814	0.0207622	FALSE
APPL1	3		1		0.410641		1		0.114491		1		0.350523		1		0.268864		0.771106	0.19911	0.029784	0	FALSE
APRT	4		0.998568		0.105259		1		0.115095		1		0.232721		0.62279		0.0883964		0.641801	0.247038	0.111162	0.0471655	FALSE
AREG	3		0.286251		0.133023		3.91542e-07	0	2.29077	1	0.201693	0.200388	0.532249	0.92	1		0.125939		0.752163	0.137214	0.0740133	0.00634003	FALSE
ARHGAP10	2		1		0.0816885		1		1.81476		1		0.00398854		1		0.0196596		0.915248	0.0649048	0.0198468	0.0822681	FALSE
ARHGAP29	2		0.648825		0.198447		1		0.841464		0.810351		0.21262		1		0.00329812		0.313373	0.241387	0.173438	0.0997755	FALSE
ARID4B	3		0.957636		0.185098		4.33176e-14	0.0299048	1.56393	0.99	7.26686e-11	0.3225	1.48849	0.86	0.000121301	0	0.548041	1	0.474998	0.282664	0.0689931	0.0400431	FALSE
ARID5B	4		0.448923		0.0715119		1		2.47188		0	0	0.686817	1	1		0.109476		0.811323	0.0932392	0.0437714	0.038076	FALSE
ARL13B	2		1		0.448509		1		0.103912		1		0.363804		1		0.174548		0.652704	0.138482	0.109434	0	FALSE
ARL6IP4	4		1		0.182856		1		0.0021239		1		0.00771883		1		0.0136027		0.449028	0.307971	0.195489	0	FALSE
ARPC1B	4		1		0.00621467		1		0.00555857		1		5.0317e-17		1		2.28436e-19		1	8.05107e-29	1.03935e-56	0	FALSE
ASPH	3		0.629018		0.50102		1		0.642929		1		0.529094		1		0.359946		0.271634	0.216694	0.150601	0.510238	FALSE
ATF3	2		1		0.0643637		1		0.150802		1		0.121671		1		0.103554		0.438419	0.143177	0.133717	0.220057	FALSE
ATOX1	3		1		0.159962		0	0	3.11248	1	1		0.227744		0.398014	0.96	0.151851	0.52	0.670047	0.208287	0.102372	0.0920251	FALSE
ATP5F1A	4		1		0.0245182		1		0.020019		1		1.59476e-17		1		4.87167e-19		1	6.93929e-31	2.76037e-60	3.46945e-18	FALSE
ATP5F1B	4		1		0.102463		1		0.0866585		1		0.0190874		1		3.00601e-17		0.972591	0.0274086	1.65367e-31	0	FALSE
ATP5F1D	4		1		0.0748224		1		0.0111993		1		0.00812067		1		0.0556401		0.896743	0.089513	0.0122062	0	FALSE
ATP5IF1	4		1		0.138433		1		0.126372		1		3.45777e-17		1		1.00405e-17		1	4.41357e-32	1.41813e-62	0	FALSE
ATP5MC1	4		1		0.0986544		1		0.0150353		1		0.075349		1		0.049384		0.990313	0.00572653	0.00396008	0	FALSE
ATP5MC2	4		1		0.0106447		1		0.00181149		1		0.00236316		1		0.0132044		0.854176	0.080974	0.0417157	0	FALSE
ATP5MC3	4		1		0.0703649		1		0.029972		1		0.00211747		1		0.123206		0.977637	0.0201122	0.00225124	1.38778e-17	FALSE
ATP5MD	4		0.700769		0.049075		1		1.54648		1		0.0202658		1		0.0407455		0.729704	0.248291	0.0220049	0.024891	FALSE
ATP5ME	4		1		0.00998907		1		8.89907e-05		1		0.0164084		1		2.03468e-17		0.836297	0.163703	9.01757e-31	0	FALSE
ATP5MF	4		1		0.0754697		0	0	2.57335	1	0	0.381391	0.512506	0.83	2.55671e-10	0	0.13039	1	0.803084	0.170704	0.0172211	0.0299425	FALSE
ATP5PF	4		0.320938		0.0901193		1		0.0387365		1		0.0374199		1		0.36518		0.871115	0.102246	0.0147958	0.0052741	FALSE
ATP6V0B	2		1		0.0316544		1		0.0240838		1		0.0130949		1		2.07119e-17		0.981065	0.0189352	3.40235e-31	6.93889e-18	FALSE
AUP1	4		0.437735		0.217169		1		0.0828459		1		0.0281407		1		0.023217		0.475048	0.382405	0.0988905	0.30105	FALSE
BAX	3		1		0.0440149		1		1.88771		1		0.415198		1		0.0328471		0.775714	0.183249	0.0181508	0	FALSE
BBX	3		1		0.288668		1		0.0139071		1		0.287607		1		0.00228274		0.865806	0.0872427	0.0465852	0	FALSE
BCL7C	3		1		0.141212		1		1.4133		1		0.127086		1		0.0461691		0.828161	0.140315	0.0300681	2.77556e-17	FALSE
BLOC1S1-RDH5	4		1		0.119514		1		0.119955		1		0.201687		1		0.286018		0.953549	0.030546	0.011071	1.38778e-17	FALSE
BTF3	4		1		0.0619647		1		0.00607212		1		0.00755539		1		0.0582187		0.893705	0.102578	0.00276687	0	FALSE
BUD31	4		1		0.161078		1		0.0126464		1		0.00347373		1		0.00670344		0.458373	0.408552	0.0855737	2.77556e-17	FALSE
C11orf58	3		1		0.182559		1		0.927183		1		0.966473		1		0.166611		0.712341	0.233056	0.0343822	0.00664728	FALSE
C12orf57	4		0.437735		0.219469		1		0.0635156		1		0.202773		1		0.168239		0.474306	0.297277	0.168542	0.182644	FALSE
C17orf49	3		1		0.154122		1		0.171998		1		1.24091		1		0.0844339		0.436455	0.291785	0.128489	0.162833	FALSE
C1orf35	2		1		0.0844366		1		1.43745		1		0.0379701		1		0.0646643		0.731444	0.173597	0.0735317	0.149914	FALSE
C1orf54	3		0.196998		0.169419		1		1.00504		0.375918		0.709022		1		0.184658		0.591301	0.181956	0.101302	0.168098	FALSE
CALD1	2		0.998568		0.202963		0	0.0299048	1.83855	0.99	0.31512		0.517862		1		0.14646		0.45669	0.205848	0.12227	0.0551265	FALSE
CALR	4		0.585925		0.257988		1		0.508985		1		0.0964373		1		0.174233		0.602953	0.158969	0.0600185	0	FALSE
CAPG	3		1		0.161811		1		0.284122		1		0.371594		1		1.29876		0.758811	0.0976492	0.0682207	0	FALSE
CASP4	4		1		0.00764159		1		1.1253		1		0.44052		1		0.685763		0.45616	0.309778	0.218223	0	FALSE
CCDC25	3		1		0.609357		1		0.592127		1		0.318832		1		0.054859		0.483474	0.395359	0.0621176	0	FALSE
CCDC47	3		1		0.213078		1		0.206827		1		0.220477		1		0.0117057		0.811396	0.167956	0.0203221	2.77556e-17	FALSE
CCDC91	2		1		0.18078		1		2.01962		1		0.27858		1		0.15497		0.536429	0.151587	0.110196	0	FALSE
CCNH	2		1		0.142999		1		0.567464		1		0.017151		1		0.0202858		0.400305	0.238132	0.198151	0.438539	FALSE
CCT4	3		1		0.0644157		1		0.0472152		1		0.0200784		1		0.0304006		0.520663	0.475793	0.00354361	0	FALSE
CD36	3		0.220793		0.203892		5.21673e-05	0.0299048	2.17058	0.99	1		0.484009		1		0.155268		0.547989	0.183569	0.114468	0.142665	FALSE
CD74	2		1		0.230864		1		1.75736		1		0.180506		1		0.12542		0.539566	0.0706503	0.0532524	0.843774	FALSE
CDC27	2		0.311256		0.295381		1		1.36002		1		0.234983		1		0.216762		0.4492	0.198237	0.13361	0.261406	FALSE
CDC40	2		1		0.0833656		1		1.73524		1		0.0518232		1		0.0376394		0.897984	0.0843326	0.017227	0.984193	FALSE
CFAP36	4		1		0.196048		1		0.236119		1		0.658776		1		0.334939		0.700072	0.199845	0.0549018	0.090832	FALSE
CFLAR	2		1		0.25657		1		1.47266		1		0.0867378		1		0.0156855		0.721615	0.244052	0.0180308	0.0203642	FALSE
CHCHD5	2		1		0.0302576		1		1.76842		1		0.0649656		1		0.0329665		0.653928	0.245766	0.054337	0.185473	FALSE
CHD1	3		1		0.178802		1		0.349185		1		0.911525		1		0.0831719		0.372462	0.277788	0.140352	0	FALSE
CHI3L2	3		1		0.133324		1		0.0156588		1		0.137196		1		0.0123161		0.622159	0.371375	0.00646588	0	FALSE
CHID1	4		1		0.12062		1		1.87339		1		0.0414748		1		0.0163116		0.829337	0.0928751	0.0299877	0.139874	FALSE
CHMP2A	4		1		0.0507237		1		0.0463017		1		0.00048282		1		2.17706e-17		0.952506	0.0474936	1.8669e-31	0	FALSE
CHORDC1	3		1		0.120386		1		0.1098		1		0.0046074		1		2.7012e-17		0.840917	0.159083	1.70535e-32	1.38778e-17	FALSE
CHURC1-FNTB	4		1		0.145111		2.01691e-15	0.277059	1.56693	0.88	1		0.0990821		1		0.279875		0.729412	0.155494	0.10689	0.193329	FALSE
CIAO2B	4		1		0.0439354		1		0.00223192		1		0.00546212		1		0.0449064		0.650746	0.198722	0.148379	0	FALSE
CIB1	4		1		0.0107459		1		0.00259216		1		0.0154399		1		0.00578233		0.901056	0.0989384	5.59783e-06	0	FALSE
CIRBP	4		1		0.129207		1.67082e-05	0	1.60332	1	0.0921353	0.447769	0.751249	0.21	1		0.276313		0.68044	0.207605	0.0726688	0.033267	FALSE
CLEC2B	4		1		0.121919		1		1.39192		1		0.190813		1		0.099894		0.457622	0.34947	0.0925022	0.0270796	FALSE
CLIC3	2		1		0.00897681		1		0.00359715		1		0.0439832		1		1.22761e-17		0.655229	0.344771	5.06158e-32	0	FALSE
CNIH4	4		1		0.150925		1		2.0887		1		0.0900753		1		0.0635839		0.664051	0.284146	0.0215309	0	FALSE
CNPY2	4		1		0.0359132		1		0.000150804		1		0.00537575		1		0.00556506		0.524835	0.435879	0.0375918	0	FALSE
COX4I2	2		0.79474		0.147465		0.00253325	0.154426	1.87328	0.94	0.133615	0.219057	0.320348	0.91	1		0.0800596		0.814315	0.117497	0.0560249	0.152895	FALSE
COX5A	4		1		0.204436		1		0.0500849		1		0.0690202		1		0.156231		0.503689	0.271955	0.10551	0	FALSE
COX6B1	4		0.280189		0.0747816		1		0.897359		1		1.3562		1		0.0113046		0.775793	0.208903	0.0074157	0	FALSE
COX6C	4		1		0.0194434		0	0	3.78667	1	0	0	1.11918	1	0	0	0.35511	1	0.818022	0.119316	0.0440983	0.00511261	FALSE
COX7A1	2		1		0.0262566		1		1.4055		1		0.00803602		1		8.83352e-16		0.997119	0.00288058	3.75866e-31	4.16334e-17	FALSE
COX7B	4		1		0.0193531		1		2.44125		1		0.0309471		1		0.0212452		0.956734	0.0291308	0.0115598	0	FALSE
COX7C	4		1		0.04921		1		0.00693416		1		0.00741619		1		0.0530784		0.708999	0.244691	0.0285017	1.38778e-17	FALSE
CPNE3	3		1		0.0961846		1		0.0949394		1		0.0193432		1		6.50411e-18		0.96783	0.0321703	9.89888e-33	2.77556e-17	FALSE
CPVL	2		0.212923		0.178001		0	0	1.64197	1	0.000863809	0	0.327038	1	0.0319147	0	0.108628	1	0.596921	0.284594	0.0520512	0.20576	FALSE
CRIP1	4		0.533657		0.0182515		1		2.88135		1		0.119863		1		0.0120953		0.915611	0.0662174	0.00747873	0.00111257	FALSE
CSRP2	2		1		0.0331057		1.23667e-11	0.21907	3.0022	0.91	1		0.185722		1		0.0402664		0.747364	0.159604	0.0744856	0.124869	FALSE
CST3	4		1		0.0135274		1		0.0011708		1		0.000481248		1		0.00421497		0.618079	0.345306	0.0170857	0	FALSE
CSTB	3		1		0.103248		1		0.103293		1		0.000286911		1		0.0095734		0.815492	0.0927397	0.0760977	0.0655455	FALSE
CTSH	2		1		0.242134		1		0.294327		1		0.0667998		1		0.00399848		0.538745	0.32852	0.132735	0	FALSE
CXCL12	2		1		0.171423		1		1.3747		1		0.0143272		1		0.0694504		0.90628	0.0837762	0.00994403	0.0847839	FALSE
CXCL14	4		1		0.0469723		1		2.64682		1		0.0258755		1		0.00526568		0.984688	0.0118635	0.00335657	0.0174567	FALSE
DAB2	2		0.504101		0.0747185		1		1.05558		0.284274	0	1.34471	1	1		0.149409		0.538712	0.230716	0.0662604	0	FALSE
DALRD3	3		0.390965		0.172839		0.0139643	0.0299048	1.50147	0.99	0.387464		0.334783		1		0.262542		0.842768	0.11282	0.0444116	0.283544	FALSE
DCXR	3		0.661689		0.0731585		0	0	2.16041	1	0	0	0.671397	1	0.530195		0.114084		0.845197	0.0804115	0.0336307	0.133215	FALSE
DDX17	3		1		0.0503604		1		1.05236		1		0.731251		1		0.171662		0.735071	0.189178	0.0738816	0.0826983	FALSE
DDX3X	3		1		0.158813		1		0.568306		1		0.581791		1		0.219326		0.382321	0.203584	0.163697	0.0974376	FALSE
DDX46	3		1		0.0899437		0	0.259699	2.57737	0.89	0	0.114667	0.829435	0.96	1		0.0200453		0.802776	0.14145	0.0320007	0.0566687	FALSE
DDX5	3		1		0.0643489		1		0.0401406		1		0.0453536		1		0.00353293		0.567673	0.339456	0.092871	0	FALSE
DECR1	4		0.213531		0.185202		1		0.395497		9.47155e-10	0.934488	1.60282	0.54	1		0.397345		0.690967	0.148848	0.0814764	0.0693235	FALSE
DEK	4		0.321595		0.197927		1		1.18912		1		0.726128		0.0130769	0.268235	0.678453	0.88	0.644161	0.194301	0.0993012	0.14037	FALSE
DGUOK	2		1		0.148765		1		0.0980815		1		0.0999343		1		0.0386748		0.460839	0.346304	0.180691	0.61135	FALSE
DHPS	2		1		0.596748		1		0.190501		1		0.0107894		1		0.46417		0.499306	0.216881	0.149832	0	FALSE
DHRS7	4		1		0.0100617		1		0.00893086		1		8.83297e-05		1		0.00319714		0.417231	0.346334	0.236434	0	FALSE
DNAJC15	4		0.832787		0.19436		1		2.20453		1		0.0325629		1		0.262963		0.880339	0.0524657	0.0312986	0.0719695	FALSE
DNAJC1	4		1		0.190764		1		1.41535		1		0.0740866		1		0.000630193		0.734737	0.256902	0.0083603	0.099839	FALSE
DNAJC21	4		1		0.452341		1		0.0381899		1		0.357512		1		0.323131		0.477882	0.299677	0.100087	0	FALSE
DNMT1	3		1		0.0375907		0.913824		1.73751		1		0.140204		1		0.168135		0.568198	0.220449	0.0798509	0.0699226	FALSE
DNPH1	2		1		0.126678		1		0.130006		1		0.0144261		1		2.83807e-17		0.999558	0.000442139	2.1164e-33	0.0696977	FALSE
DRAP1	4		0.175515		0.0874782		2.28129e-06	0.774533	2.18895	0.63	1		0.226682		1		0.193262		0.533572	0.376512	0.0748494	0.0469514	FALSE
DSTN	2		1		0.160943		1		0.0204252		1		0.0285607		1		0.148591		0.9672	0.0261983	0.00660143	1.05509	FALSE
DUT	4		1		0.0153135		1		0.00324373		1		0.000260755		1		0.0240573		0.864994	0.132971	0.00203507	0	FALSE
DYNC1LI2	2		1		0.106		1		0.0865485		1		4.38336e-17		1		1.709e-17		1	1.17882e-31	2.34022e-63	1.38778e-17	FALSE
ECH1	3		1		0.0829502		1		0.0748897		1		0.0112016		1		1.79244e-17		0.709232	0.290768	1.1364e-32	0	FALSE
ECSCR	2		1		0.034365		1		0.181035		1		0.192918		1		0.135882		0.739962	0.171733	0.0550651	0.0405853	FALSE
EDNRB	2		1		0.165748		1		0.114712		0.598219		0.112593		1		3.80321e-17		0.947012	0.0529879	1.81881e-32	0	FALSE
EFHD2	2		1		0.0450171		1		2.00999		1		0.0434294		1		0.00561235		0.923159	0.0513319	0.0160262	0.722533	FALSE
EIF3D	4		1		0.0450848		1		0.0447847		1		0.0132381		1		1.8113e-17		0.844839	0.155161	1.80717e-30	0	FALSE
EIF3E	4		1		0.0683004		1		1.11784		1		0.874931		1		0.0819543		0.431784	0.275411	0.0967808	0.034337	FALSE
EIF3H	4		1		0.161388		1		0.0279961		1		0.137497		1		0.0513417		0.990854	0.00593752	0.0032082	0	FALSE
EIF3K	4		0.874602		0.044427		1		2.43327		1		0.187026		1		0.0866275		0.84171	0.0744878	0.0575292	0.00580624	FALSE
EIF3L	4		1		0.0300489		1		1.99303		1		0.0388533		1		0.0166318		0.961076	0.0145613	0.0117635	0.000841085	FALSE
EIF3M	4		0.191976		0.180173		0	0.71651	2.51568	0.34	0	0.84624	1.07946	0.41	1		0.0393214		0.819937	0.143024	0.0314231	0	FALSE
EIF4A1	4		1		0.143119		1		0.159875		1		0.0059788		1		0.000524978		0.843488	0.1357	0.0114443	0	FALSE
EIF4A3	4		1		0.148621		1		0.0369944		1		0.049566		1		0.141102		0.647037	0.260933	0.0746089	0	FALSE
EIF4B	4		0.880413		0.230633		1		1.93772		3.60422e-09	0.0318519	1.26583	0.99	0.253173	0	0.200518	1	0.602679	0.316079	0.052053	0.099002	FALSE
EIF5	3		1		0.0832084		1		0.00725908		1		0.111659		1		0.00243693		0.832653	0.0838524	0.0506299	1.38778e-17	FALSE
ELF1	2		1		0.0456767		1		1.41112		1		0.0076332		1		0.00276166		0.828658	0.159942	0.00935092	0.0403658	FALSE
ELOB	4		1		0.0122728		0.00688381	0	2.10498	1	0	0	0.241533	1	1		0.0637422		0.961507	0.0146591	0.0105399	0.000281833	FALSE
ELOC	3		0.495499		0.195753		0.103129	0.197795	1.30241	0.92	3.64256e-05	0.447769	1.55874	0.79	1		0.417709		0.475905	0.291069	0.114593	0	FALSE
EMC3	3		1		0.110799		1		0.00673518		1		0.0213023		1		0.0825693		0.841223	0.111104	0.0299201	0	FALSE
EMP3	3		1		0.118935		1		1.86033		1		0.461288		1		0.0931635		0.514198	0.261411	0.096069	0	FALSE
ENO3	2		1		0.134916		1		0.0643374		1		0.431212		1		1.18214		0.857895	0.104682	0.0180711	0.472699	FALSE
ENY2	4		1		0.0889181		1		0.0404639		1		0.206775		1		0.105408		0.919314	0.0772769	0.00340916	0	FALSE
EPB41L4A-AS1	3		1		0.0564477		1		0.757249		1		0.0983113		1		0.056422		0.621879	0.334562	0.0435583	0	FALSE
EPS8	2		1		0.337884		1		0.119487		1		0.292479		0.799769		0.232366		0.408305	0.358042	0.169135	1.70072	FALSE
ERCC1	4		0.3875		0.234676		0.50896		1.59829		1		0.446326		1		0.255011		0.559826	0.31248	0.046919	0	FALSE
ERGIC3	3		1		0.136027		1		0.0419177		1		0.0707059		0.183457	0.164198	0.221759	0.93	0.70699	0.174369	0.118641	0.192792	FALSE
ERLEC1	2		1		0.0895597		1		0.0187697		1		0.0807507		1		0.0014542		0.796202	0.191321	0.0124766	0	FALSE
ERP44	2		1		0.0535288		1		0.0437061		1		1.7352e-17		1		4.64415e-18		1	7.46761e-32	7.24046e-35	6.93889e-18	FALSE
ESD	3		1		0.0893237		1		0.0729325		1		2.90263e-17		1		3.97233e-18		1	6.79734e-32	6.05574e-63	0	FALSE
ETFB	4		0.533657		0.141785		1		1.25463		1		0.927554		1		0.30462		0.598644	0.227381	0.0939238	0.129177	FALSE
ETHE1	4		1		0.0708664		0	0	3.41167	1	0.113455	0.219057	0.213224	0.91	2.73434e-10	0.076	0.378744	0.97	0.899609	0.0393672	0.0297441	4.16334e-17	FALSE
ETS2	4		1		0.09335		1		0.0862201		1		0.036963		1		3.95687e-17		0.998253	0.00174706	1.22934e-31	0.045731	FALSE
EZR	3		1		0.169703		1		0.651463		1		1.23926		1		0.0443292		0.677708	0.261968	0.049049	0.115654	FALSE
FAM177A1	2		1		0.152571		1		2.04872		1		0.214612		1		0.236237		0.708722	0.138935	0.0838037	0.201919	FALSE
FAM204A	3		0.998568		0.302138		0.201669	0.805658	1.93108	0.61	1		0.325637		1		0.131919		0.674707	0.167002	0.0623993	0.000541595	FALSE
FAM50A	3		1		0.322932		1		0.0855044		1		0.0225014		1		0.157364		0.644857	0.186256	0.0896471	0	FALSE
FASTK	2		1		0.09759		1		0.0786716		1		0.030881		1		1.61134e-17		0.943532	0.0564682	5.95709e-33	0	FALSE
FBP1	2		1		0.0665277		0.208227	0.856364	1.43874	0.58	1		0.600914		1		0.117742		0.530785	0.14521	0.129533	0.137497	FALSE
FDPS	4		1		0.0770231		1		0.077574		1		0.0725214		1		0.0408714		0.791468	0.156273	0.0522584	0	FALSE
FEZ2	3		0.202673		0.368532		0.0028369	0.277059	1.32582	0.88	1		0.29472		1		0.0786316		0.959435	0.0341026	0.00646276	5.55112e-17	FALSE
FIBP	2		1		0.099932		1		0.00686613		1		0.0704147		1		0.0772625		0.699814	0.192804	0.107382	1.38778e-17	FALSE
FIS1	4		1		0.113894		1		0.018828		1		0.0320326		1		0.0613012		0.839711	0.139207	0.0183717	0	FALSE
FKBP11	3		1		0.0112111		0	0	3.14494	1	0	0	1.15228	1	1		0.116073		0.863667	0.117385	0.0173856	0	FALSE
FKBP2	4		1		0.0406212		1		2.29381		1		0.336111		1		0.030463		0.691007	0.239104	0.0266593	0.00026073	FALSE
FOS	4		1		0.143784		1		0.0395201		1		0.0369763		1		0.0234059		0.918661	0.0515081	0.0232875	0	FALSE
FRA10AC1	2		0.394973		0.508414		1		0.220457		1		0.45556		1		0.0568699		0.624931	0.18184	0.141492	1.11022e-16	FALSE
FTL	4		1		0.0327186		1		0.0120148		1		0.00141937		1		0.00137207		0.135393	0.0803697	0.0591975	0.0155189	FALSE
FUS	2		1		0.297044		1		0.0800419		1		0.222324		1		0.033095		0.459324	0.413686	0.109463	0.107255	FALSE
FXYD1	2		1		0.0546815		1		0.677541		1		0.455559		1		0.947844		0.435578	0.221932	0.180067	0.0183343	FALSE
FXYD5	3		1		0.274079		1		0.0652168		1		0.0389557		1.67732e-07	0.443333	0.973564	0.79	0.490312	0.173758	0.14233	0.0397423	FALSE
GADD45B	3		1		0.120154		1		1.24663		1		0.00459031		1		0.0337112		0.404158	0.130276	0.0976106	0.0566826	FALSE
GAPDH	4		1		0.0193916		1		9.64108e-05		1		0.00010837		1		8.48685e-05		0.356634	0.205095	0.0664432	0	FALSE
GMFG	4		1		0.0811755		1		1.39943		1		0.0747085		1		0.0239471		0.388442	0.171507	0.127297	0	FALSE
GPS2	3		1		0.447445		1		0.0764026		1		0.278341		1		0.365536		0.719414	0.242488	0.0380974	1.66533e-16	FALSE
GPX4	4		0.187195		0.0247431		1		2.75517		1		0.00121906		1		0.00814841		0.979216	0.0122853	0.00438264	0.000269903	FALSE
GSTP1	4		1		0.142857		1		0.00661543		1		0.0504534		1		0.134925		0.488372	0.256303	0.213424	0	FALSE
H2AZ2	2		1		0.186525		0.344752		0.475299		1		0.140002		1		0.0439134		0.371247	0.334935	0.193655	2.77556e-17	FALSE
H3-3B	4		1		0.0280302		1		0.00307182		1		0.0264126		1		0.000248695		0.962257	0.0352925	0.00245023	6.93889e-18	FALSE
HBEGF	2		1		0.155193		1		0.0720217		1		0.137234		1		0.131636		0.692243	0.302131	0.00513505	0.0161554	FALSE
HCST	2		0.818302		0.120945		1		2.55283		0.387464		0.310577		1		0.146106		0.906651	0.0735737	0.017171	0	FALSE
HEBP2	2		0.933753		0.0881767		1		1.78683		1		0.0386982		1		0.151514		0.84004	0.108409	0.0445841	0.0930135	FALSE
HEXA	2		1		0.0119978		1		0.00183898		1		0.0109493		1		0.000336261		0.945516	0.0482208	0.00626357	1.73472e-18	FALSE
HIGD1B	2		1		0.145689		1		1.41584		1		0.35267		1		0.230914		0.665548	0.230935	0.0823568	0.0346881	FALSE
HINT1	4		0.611846		0.105902		1		2.82982		1		0.174343		1		0.0898327		0.750971	0.225839	0.0168286	0.0792413	FALSE
HINT2	4		1		0.0210751		1		1.09828		1		0.0717665		1		3.03278e-17		0.894813	0.105187	1.92958e-32	2.77556e-17	FALSE
HNRNPA2B1	4		0.345428		0.277142		0.00251237	0.442254	1.39123	0.2	0.86777		0.251727		1		0.0385767		0.551157	0.201712	0.157333	0.0210962	FALSE
HNRNPD	3		0.931856		0.257946		0.353032		1.52277		0.0878637	0.3225	0.417133	0.86	0.398014		0.598388		0.566332	0.166199	0.110913	0.180223	FALSE
HNRNPUL2-BSCL2	2		0.874407		0.146176		1		0.230887		1		0.139202		1		3.14935e-17		0.86614	0.13386	1.23519e-32	0	FALSE
HNRNPU	2		1		0.498058		1		0.230351		1		0.292859		1		0.244175		0.753325	0.193586	0.0530884	0	FALSE
HSBP1	3		1		0.0249922		1		0.020406		1		1.90904e-17		1		2.40659e-19		1	1.82099e-30	8.22831e-62	6.93889e-18	FALSE
HSP90AA1	4		0.636033		0.0707866		0	0	4.20834	1	0	0	0.990758	1	1		0.137474		0.651511	0.121835	0.0744996	0.000536657	FALSE
HSPB11	4		1		0.146816		1		1.32082		1		0.0534017		1		0.340263		0.606142	0.184135	0.125698	0.0454487	FALSE
HSPD1	4		1		0.0080778		1		2.00593		1		0.0237595		1		0.0273456		0.942109	0.034806	0.00990337	0.000139121	FALSE
HSPE1-MOB4	4		1		0.076509		1		0.0254501		1		0.017869		1		0.0151464		0.733738	0.180379	0.0450116	0	FALSE
HSPH1	3		0.237753		0.147316		1		0.274891		0.000825406	0.0614286	0.466325	0.98	1		0.0109302		0.438515	0.337867	0.171932	0.269942	FALSE
HYPK	4		1		0.0629399		1		2.18503		1		0.00460546		1		0.00199873		0.978191	0.0150679	0.00466513	0	FALSE
ID2	4		0.460829		0.158237		1		1.37504		1		0.0360069		1		0.0228678		0.729609	0.166603	0.0937876	0.187558	FALSE
IDH3G	3		1		0.04663		1		1.90483		1		0.00977113		1		0.0360409		0.837686	0.124952	0.019656	0.078258	FALSE
IFI30	3		0.713728		0.256968		1		2.03576		1		0.308229		1		0.00047908		0.696387	0.059096	0.0361771	0.202494	FALSE
IFITM3	3		1		0.0117253		1		0.0663846		1		0.0294245		1		0.090661		0.422875	0.330438	0.246688	0	FALSE
IGFBP6	4		1		0.0570464		1		0.00603102		1		0.00560135		1		0.00817861		0.72115	0.117831	0.0373524	2.08167e-17	FALSE
IGFBP7	4		1		0.0460652		1		2.30113		1		0.88466		1		0.0090506		0.832444	0.142232	0.0102525	0	FALSE
IGSF6	2		1		0.0501367		1		2.24162		1		0.0110297		1		0.0397445		0.902047	0.0455102	0.0242369	0.686324	FALSE
IL6ST	2		1		0.00279085		1		1.99117		1		0.00435293		1		0.0036229		0.988607	0.00578187	0.00433899	0.0010252	FALSE
ILF3	2		1		0.493036		1		0.416559		1		0.264216		1		0.010814		0.675244	0.313091	0.00952652	0	FALSE
ITGB1BP1	3		0.533657		0.188456		2.56795e-12	0.133051	2.26441	0.95	1		0.0513997		1		0.0837405		0.803673	0.107172	0.0469494	0.156048	FALSE
ITGB1	4		0.216564		0.418808		1		2.42641		1		0.169347		1		0.0111652		0.903101	0.0720329	0.0159085	0.00990304	FALSE
JAM2	2		1		0.0387311		1		1.87966		1		0.243565		1		0.193983		0.774244	0.133921	0.056192	0.0646418	FALSE
JMJD1C	3		0.20165		0.286601		0.03007	0.174444	1.37829	0.93	1		0.409532		1		0.140128		0.436661	0.246376	0.0842541	0.446429	FALSE
JPT1	3		1		0.0346002		1		2.05383		1		0.653512		1		0.290163		0.511866	0.397865	0.0753594	0	FALSE
KIF5B	4		0.246091		0.180305		1		1.46886		1		0.0743427		1		0.00699201		0.862807	0.083688	0.0457097	0	FALSE
KLRB1	2		0.998568		0.115668		1		0.63819		0.291413	0.159588	1.07496	0.06	1		0.0488715		0.846205	0.136402	0.0148237	0	FALSE
KRT17	2		0.730549		0.0824471		1		0.144412		1		0.450514		1		1.73817		0.712373	0.187671	0.0968333	0.158776	FALSE
KTN1	4		1		0.0747605		0.749765		1.234		0.93077		0.467099		1		0.22522		0.322205	0.205886	0.133354	0.0525618	FALSE
LAMTOR5	2		1		8.14485e-16		1		0.0215089		1		0.0510378		1		1.29015e-17		0.750923	0.249077	2.39504e-32	0	FALSE
LARP7	2		1		0.32695		1		0.0757993		1		0.311749		1		0.0638247		0.743241	0.12075	0.061695	0	FALSE
LGALS1	4		0.511639		0.0581595		1		2.75005		0	0	0.600155	1	1		0.0134951		0.839963	0.124335	0.0261041	0.0155184	FALSE
LGALS3	4		1		0.126948		1		0.0016648		1		0.017281		1		0.00794406		0.477015	0.44591	0.0591641	0	FALSE
LMAN1	4		1		0.13606		1		0.540831		1		0.106799		1		2.37715e-17		0.775954	0.224046	2.12946e-32	0	FALSE
LMAN2	2		1		0.00462996		1		0.00400966		1		1.27442e-18		1		3.01861e-19		1	8.20373e-32	9.76433e-36	2.19511	FALSE
LRMDA	2		0.68288		0.155342		1		2.55829		1		0.129902		1		0.0683647		0.86388	0.0477227	0.0260725	0.159434	FALSE
LRRFIP2	3		0.229187		0.281404		0.00812205	0.98	1.74789	0.49	1		0.02209		1		0.188942		0.602271	0.204113	0.108548	0	FALSE
LSM7	2		1		0.190972		1		0.263816		1		0.149279		1		5.83626e-19		0.603857	0.396143	1.17162e-32	0	FALSE
LTA4H	2		0.998568		0.0933743		1		1.25457		3.70905e-06	0.415424	1.45772	0.81	1		0.0335864		0.591535	0.239664	0.116682	1.13826	FALSE
LUZP6	3		1		0.0769908		1		0.465057		1		1.16817		1		0.0696105		0.789757	0.154925	0.0340704	0.0371213	FALSE
LY96	3		0.369801		0.216064		1		2.29255		1		0.205733		1		0.161047		0.534692	0.341483	0.0528418	0	FALSE
MAGOH	3		1		0.169507		1		1.34309		1		0.667518		1		0.101945		0.797117	0.171936	0.0303916	0.0430732	FALSE
MALSU1	2		1		0.0827688		1		0.517505		1		0.0966892		1		0.0824107		0.680029	0.290818	0.0291529	4.16334e-17	FALSE
MARCO	2		1		0.062864		1		2.35852		1		1.47014		1		0.175379		0.551816	0.267861	0.0758576	0.368923	FALSE
MCTS1	3		0.218073		0.109968		1		0.661194		1		1.19236		1		2.09996e-05		0.840669	0.151534	0.00464181	0	FALSE
MCUB	3		1		0.0907733		1		1.03948		1		0.170765		1		0.012337		0.814826	0.125324	0.0385701	0	FALSE
MCUR1	4		1		0.291825		1		0.00820599		1		0.134343		1		0.334369		0.655989	0.186208	0.0721665	0	FALSE
METTL26	4		0.211579		0.238683		1		0.282092		1		0.121762		1		0.187912		0.4316	0.231184	0.172615	0.353403	FALSE
MGP	4		1		0.0816404		1		2.53862		1		0.0385072		1		0.03353		0.846199	0.0762544	0.0686311	0.0204336	FALSE
MGST2	4		1		0.26138		0.775031		0.972979		1		0.528906		0.253173	0.578261	0.582376	0.72	0.574639	0.257319	0.105878	0.0294594	FALSE
MICOS10-NBL1	4		0.267966		0.145461		1		1.55088		0	0.3225	1.00745	0.86	0.0437348	0.0974359	0.13641	0.96	0.739062	0.163932	0.0812135	0.115721	FALSE
MICOS13	4		0.821061		0.168722		1		1.59267		1		0.0742545		1		0.00823992		0.928242	0.0600825	0.0116753	0	FALSE
MKNK2	2		1		0.10785		1		0.587583		1		1.4107		1		0.107543		0.459214	0.404952	0.113448	0.0287957	FALSE
MLEC	2		1		0.228991		1		0.235047		1		0.128435		1		0.0240211		0.753932	0.242926	0.00314267	0	FALSE
MPC2	3		0.942503		0.24168		1		0.240991		1		0.0786824		1		7.093e-17		0.992433	0.00756721	4.31991e-32	0	FALSE
MRPL21	4		1		0.0705655		1		0.000760974		1		0.110268		1		0.0685171		0.542757	0.283171	0.174072	0	FALSE
MRPL47	2		1		0.200745		1		0.0102936		1		0.0348905		1		0.199659		0.439268	0.271506	0.203782	0	FALSE
MRPL52	4		0.739109		0.161444		0.325471		2.26951		0.000145942	0.137234	1.01174	0.95	1		0.0149195		0.643559	0.213178	0.0530058	0.0100941	FALSE
MRPS18C	4		0.323756		0.238749		1.52424e-10	0	2.02119	1	0.080339	0.0318519	0.404907	0.99	0.787586		0.16789		0.666996	0.244626	0.0389537	0.0505465	FALSE
MRPS21	2		1		0.159189		1		0.161012		1		0.0996297		1		5.71292e-18		0.884251	0.115749	1.44728e-32	2.77556e-17	FALSE
MS4A7	2		0.820484		0.082702		0.97396		0.375072		1		0.0135772		1		0.147162		0.339415	0.192088	0.137777	0.325653	FALSE
MSN	3		1		0.176132		1		0.0244455		1		0.174347		1		0.000242125		0.470838	0.41682	0.10891	0	FALSE
MSRB2	2		1		0.0635001		1		0.0518476		1		1.66981e-17		1		6.02698e-18		1	1.32435e-31	9.32658e-63	0	FALSE
MT1A	2		1		0.108148		1		0.0967302		1		1.12894e-17		1		3.32463e-17		1	3.4781e-32	7.10844e-65	1.38778e-17	FALSE
MT1E	4		1		0.37149		1		0.373508		1		0.00603166		1		7.16529e-18		0.953923	0.0460767	2.74236e-32	5.55112e-17	FALSE
MT2A	4		1		0.00456126		1		2.08004		1		0.000604245		1		0.000871895		0.991465	0.00560894	0.00215291	0.00246044	FALSE
MTCH2	2		1		0.499692		1		0.506756		1		0.0297565		1		0.0707558		0.848918	0.113897	0.0371846	0.0476084	FALSE
MTDH	4		1		0.0985968		1		1.87088		1		0.210312		1		0.240093		0.571728	0.18002	0.0877956	0.0521625	FALSE
MVP	2		1		0.0492068		1		0.0401772		1		3.15768e-18		1		1.10634e-18		1	1.02857e-34	4.84541e-35	1.38778e-17	FALSE
MYL6B	2		1		0.0313921		0.829215		1.70175		1		0.0760171		1		0.137096		0.771241	0.198168	0.0241234	0	FALSE
MZT2A	3		0.721488		0.298905		0.0656894	0.241538	1.91789	0.9	1		0.0549942		1		0.141816		0.770001	0.124005	0.0846123	0.259773	FALSE
MZT2B	4		1		0.252387		1		0.124532		1		0.188285		1		1.44013e-16		0.768123	0.231877	1.51695e-31	5.55112e-17	FALSE
NAA38	4		1		0.260873		5.37485e-08	0.0299048	1.34439	0.99	1		0.176518		1		0.219097		0.786975	0.147626	0.065399	3.1225e-17	FALSE
NANS	2		1		0.0312806		1		0.0259815		1		0.00393451		1		0.0121726		0.971838	0.0186875	0.00947414	0	FALSE
NAP1L1	4		0.199366		0.112274		2.01691e-15	0.154426	1.42669	0.94	0.159262	0.178812	0.517843	0.93	1		0.201468		0.376449	0.181709	0.123225	0.0978274	FALSE
NASP	4		1		0.0477191		0.0378194	0.154426	2.52523	0.94	0.525588		0.420362		1		0.476758		0.606273	0.0953797	0.0833406	0.0285205	FALSE
NBDY	2		1		0.152499		1		0.124515		1		2.508e-17		1		2.72961e-18		1	3.04791e-32	9.18232e-34	0	FALSE
NDFIP1	3		1		0.0750144		1		1.53124		1		0.675908		1		0.130644		0.553799	0.28543	0.0763044	0	FALSE
NDUFA12	4		1		0.23207		1		0.903432		1		0.0620992		1		0.0352418		0.950651	0.0414134	0.00793524	0.0164192	FALSE
NDUFA13	4		1		0.0328277		1		2.14225		1		0.789453		1		0.0434405		0.7387	0.196878	0.0385972	0.0141925	FALSE
NDUFA1	4		1		0.0686843		1		1.92295		1		0.000128554		1		0.00544273		0.974742	0.0217383	0.00258658	0	FALSE
NDUFA2	4		1		0.107062		1		0.92445		1		0.0342248		1		2.46635e-17		0.840828	0.159172	9.04161e-33	0.00740234	FALSE
NDUFA7	3		1		0.00332155		6.0273e-11	0	2.82999	1	0.00823709	0.0869663	0.380671	0.97	1		0.133403		0.986012	0.00821544	0.00561558	0.000266979	FALSE
NDUFAF3	4		1		0.423859		1		0.34608		1		1.45457e-16		1		1.40649e-17		1	1.63858e-31	1.52332e-61	0	FALSE
NDUFB10	4		1		0.0387842		1		2.02061		1		0.000653579		1		0.052309		0.951671	0.0232667	0.0169834	0.00168477	FALSE
NDUFB1	4		0.272682		0.287238		1		2.00146		1		0.073339		1		0.0606744		0.941693	0.0297022	0.0126361	0.346787	FALSE
NDUFB4	4		1		0.00242672		1		0.0253011		1		0.0159562		1		0.112298		0.686804	0.187196	0.126	0	FALSE
NDUFB6	4		1		0.327093		1		0.366946		1		0.275972		1		0.0551268		0.615516	0.294814	0.0732676	5.55112e-17	FALSE
NDUFB9	4		0.927087		0.103128		1		1.64573		1		0.150329		1		0.0185397		0.655911	0.271904	0.0656761	0.0738402	FALSE
NDUFC1	4		0.199366		0.106216		1		2.34094		1		0.0253144		1		0.00592103		0.846438	0.0676949	0.0376637	0.0738267	FALSE
NDUFC2	4		1		0.0558532		1		0.045604		1		3.12113e-17		1		1.53182e-17		1	3.12103e-31	3.21337e-34	6.93889e-18	FALSE
NDUFS2	3		1		0.131218		1		0.0281649		1		0.116427		1		1.4384e-17		0.979346	0.0206543	4.92795e-33	2.77556e-17	FALSE
NDUFS3	2		1		0.0934714		1		0.0933974		1		0.0179201		1		1.592e-17		0.999751	0.000248885	6.15134e-33	0	FALSE
NDUFS4	4		1		0.377602		1		0.166108		1		0.891824		1		0.0929593		0.839177	0.1311	0.0218394	0	FALSE
NDUFS5	4		1		0.0573423		1		0.0226526		1		0.00198375		1		0.0335072		0.850964	0.142203	0.0043793	1.38778e-17	FALSE
NDUFS6	4		0.355201		0.0814086		1		1.29598		1		0.673549		1		0.0945806		0.779384	0.145295	0.0720054	6.93889e-18	FALSE
NDUFS7	4		1		0.0177499		1		0.0144928		1		7.8946e-17		1		1.43561e-18		1	2.90735e-29	6.8254e-36	3.46945e-18	FALSE
NEDD8-MDP1	2		1		0.488579		1		0.188796		1		0.467392		1		0.256521		0.609277	0.333463	0.0539729	0.606348	FALSE
NFKBIZ	3		1		0.537299		1		0.185398		1		0.414625		1		0.215217		0.717967	0.232548	0.0494844	0	FALSE
NIT2	2		1		0.16265		1		0.132803		1		1.76323e-17		1		5.65961e-18		1	7.5653e-33	5.05486e-34	0	FALSE
NPC2	4		1		0.070507		1		0.0225769		1		0.0517024		1		0.0475621		0.90637	0.0580085	0.0356211	0	FALSE
NR3C1	2		1		0.336219		1		0.274522		1		6.36291e-17		1		3.93768e-17		1	3.54062e-32	1.34054e-33	5.55112e-17	FALSE
NSA2	3		1		0.184252		1		2.12651		1		0.11057		1		0.0447877		0.864941	0.0986044	0.0278738	0	FALSE
NSMCE1	2		1		0.217988		1		0.214124		1		0.0387624		1		0.040594		0.70695	0.255222	0.0378281	0	FALSE
NSMCE4A	3		1		0.376139		1		0.25594		1		0.0653044		1		0.0693364		0.47393	0.324466	0.0994073	5.55112e-17	FALSE
NUCKS1	4		0.536556		0.0948368		1		1.99504		1		0.0272951		0	0	0.691463	1	0.699692	0.188602	0.0811835	0.0287312	FALSE
NUDT22	3		1		0.479081		1		0.0980254		1		0.531163		1		0.121676		0.700471	0.251279	0.0422781	1.66533e-16	FALSE
NUDT5	2		1		0.165712		1		0.0183943		1		0.13622		1		0.104729		0.48303	0.383886	0.130605	0	FALSE
NUPR1	4		1		0.305971		1		0.0145963		1		0.0244747		1		0.113643		0.977575	0.00710666	0.00550238	0	FALSE
OCIAD2	4		0.300039		0.329395		1		1.14238		1		1.19759		1		0.0350667		0.519801	0.293016	0.140798	0.194007	FALSE
ODF3B	2		1		0.0396383		1		0.0328625		1		0.142993		1		4.24153e-17		0.731003	0.268997	8.97133e-33	2.08167e-17	FALSE
OPTN	3		1		0.233249		1		1.16843		1		0.687616		1		0.466616		0.507543	0.229321	0.119848	0	FALSE
OSBPL1A	3		1		0.438522		1		0.14796		1		0.476172		1		0.030347		0.549495	0.152785	0.109939	0	FALSE
OST4	4		1		0.0220566		1		0.0415977		1		0.0187778		1		3.0535e-16		0.801982	0.198018	2.33335e-29	3.46945e-18	FALSE
PABPC1	4		1		0.0164058		1		2.09763		1		0.30144		1		0.0224571		0.787918	0.050803	0.0403393	0.0173024	FALSE
PAPOLA	4		1		0.0957165		1		0.00749092		1		0.01394		1		0.088652		0.550556	0.361711	0.0671825	1.38778e-17	FALSE
PCM1	4		0.315683		0.31776		0.00266539	0.154426	1.4389	0.94	1		0.354447		1		0.182133		0.503019	0.263992	0.150939	0.307528	FALSE
PDCD5	4		0.926617		0.0804331		1		0.986161		1		0.589868		1		0.516076		0.446332	0.322196	0.10726	0.0469821	FALSE
PDXK	3		0.821061		0.162536		1		1.34996		1		0.00798415		1		0.0187879		0.758143	0.201004	0.0323983	0.16175	FALSE
PEX16	2		1		0.207507		1		0.0774403		1		0.177127		1		0.137153		0.481263	0.372355	0.134581	0	FALSE
PFDN2	3		1		0.145985		1		0.0970573		1		0.0810153		1		2.05816e-17		0.929648	0.0703517	2.11017e-32	0	FALSE
PFN1	4		1		0.133013		1		0.0381745		1		0.0352966		1		0.0321749		0.872057	0.107933	0.0163539	0	FALSE
PHIP	2		1		0.184202		1		0.019494		1		0.16523		1		0.0959066		0.825085	0.170602	0.00431233	0	FALSE
PHPT1	4		1		0.11367		1		2.13824		1		0.194069		1		0.0110965		0.902856	0.0800518	0.0170922	0.00508151	FALSE
PILRA	2		1		0.401145		1		0.0348717		1		0.253148		1		0.144246		0.876718	0.0493525	0.026438	0	FALSE
PIN4	2		1		0.0716115		1		0.0584705		1		2.1164e-17		1		2.76964e-18		1	7.87719e-32	4.6458e-63	0	FALSE
PLA2G2A	2		1		0.0349819		1		2.65672		1		1.75278		1		0.023963		0.563171	0.243443	0.09646	0.0366938	FALSE
PLAAT3	4		1		0.0659798		1		0.0177736		1		0.0262642		1		0.0797327		0.959506	0.0339563	0.00653809	1.38778e-17	FALSE
PLAC8	2		0.280189		0.208937		1		1.67287		1		0.0312753		1		0.565854		0.637792	0.234731	0.111871	0	FALSE
PLAC9	2		0.352122		0.114869		1		1.92213		1		0.0428078		1		0.00398606		0.952304	0.0413991	0.00629665	0.286022	FALSE
PLPP3	2		1		0.161193		1		2.71386		1		0.0135856		1		0.0298612		0.953108	0.0229802	0.0109748	0.0503765	FALSE
PLTP	2		1		0.0773052		1		0.00141235		1		0.00560989		1		0.0131864		0.679708	0.161812	0.0863117	0	FALSE
PNISR	4		1		0.0662713		1		0.0800986		1		0.109618		1		0.0918922		0.451111	0.29107	0.0678328	0.0034598	FALSE
PNKP	2		1		0.109764		1		0.0896221		1		3.63424e-17		1		1.37644e-17		1	8.54752e-32	5.42051e-63	1.38778e-17	FALSE
PNN	3		1		0.0659611		1		0.0916114		1		0.0214584		1		1.72487e-17		0.717044	0.282956	1.72308e-32	0.00961194	FALSE
PNRC2	2		1		0.305888		1		0.341485		1		0.10039		1		0.00397462		0.534787	0.382324	0.082889	0	FALSE
POLE4	2		1		0.118264		1		0.421201		1		0.674673		1		0.077817		0.747238	0.246048	0.0052369	0.111844	FALSE
POLR2F	4		1		0.00722777		0	0.541379	2.84814	0.75	2.95991e-07	0.396923	0.532013	0.82	0.408678		0.203068		0.944664	0.0359714	0.0142955	3.98986e-17	FALSE
POLR2G	2		1		0.0637577		1		0.0520579		1		2.53859e-17		1		5.83369e-18		1	1.61094e-31	5.40929e-35	0	FALSE
POLR2I	4		0.830959		0.108646		1		1.65315		1		0.811602		1		0.0244694		0.707799	0.249742	0.0287941	1.04083e-17	FALSE
PPA2	4		0.931856		0.186479		1		1.19773		1		0.524873		1		0.0193649		0.607022	0.331008	0.0464075	0.146283	FALSE
PPFIBP1	2		1		0.0647067		0.958373		2.43983		1		0.0333132		0.487365		0.101955		0.811685	0.110646	0.0225323	0.241529	FALSE
PPIB	4		1		0.0209957		1		0.0191655		1		0.00018684		1		5.84226e-17		0.956488	0.043512	9.59399e-30	0	FALSE
PPIG	4		1		0.0435497		1		1.49797		1		0.0519684		1		0.0651365		0.434705	0.295746	0.178783	0.0277778	FALSE
PPP1R14A	3		0.271016		0.0837195		1		2.24363		1		0.0360233		1		0.0196298		0.945452	0.0389144	0.0104579	0	FALSE
PQBP1	3		1		0.36534		1		0.39983		1		0.822486		1		0.109755		0.616958	0.284037	0.0848012	0	FALSE
PRDX2	3		1		0.0386046		1		0.020601		1		0.0263312		1		1.32861e-17		0.992828	0.00717212	3.15177e-33	0.0476467	FALSE
PRDX4	4		1		0.0128385		1		1.97837		1		0.169956		1		0.499199		0.75579	0.16067	0.0602855	0.00358852	FALSE
PRDX6	4		1		0.0581042		1		0.0474419		1		2.05871e-17		1		6.65388e-19		1	1.91693e-32	2.76396e-63	0	FALSE
PRELID1	4		0.975672		0.104266		1		1.39201		1		0.0647108		1		0.0116917		0.907048	0.0705427	0.0213856	0.0374592	FALSE
PRKAR2B	2		1		0.0936586		1		0.0764719		1		1.22493e-17		1		2.56253e-18		1	3.52316e-33	6.46219e-65	0	FALSE
PRMT1	2		1		0.147087		1		0.120096		1		9.91345e-19		1		2.53759e-17		1	7.21935e-33	1.20014e-33	2.77556e-17	FALSE
PRRC2C	4		1		0.17457		1		0.679516		0.82996		0.27427		1		0.240373		0.30953	0.221108	0.191891	0.135396	FALSE
PSIP1	3		1		0.199309		1		0.016901		1		0.162359		1		0.127338		0.801871	0.185686	0.0124428	0	FALSE
PSMA4	2		1		0.189304		1		0.189379		1		0.00309123		1		2.8816e-17		0.996733	0.00326734	4.35574e-33	0	FALSE
PSMA5	3		0.427939		0.137857		1		1.73617		1		0.398885		1		0.01106		0.807884	0.0925331	0.0510711	0	FALSE
PSMB10	3		1		0.065606		1		0.0752747		1		0.00698317		1		1.81373e-19		0.791407	0.208593	5.40428e-32	1.38778e-17	FALSE
PSMB1	4		1		0.045502		1		1.93246		1		0.0337278		1		0.00752024		0.92964	0.063376	0.00698371	0	FALSE
PSMB2	4		1		0.135705		1		0.0263296		1		0.0587596		1		0.201597		0.577425	0.41465	0.00694146	0	FALSE
PSMB4	4		1		0.193574		1		1.16568		1		0.92204		1		0.0220246		0.835687	0.160907	0.00310247	0.0397298	FALSE
PSMB6	4		1		0.0359775		1		0.0293755		1		3.80425e-17		1		1.93331e-18		1	1.70176e-30	5.2847e-61	0	FALSE
PSMB7	4		1		0.0595491		1		0.0508327		1		0.00869574		1		4.16594e-18		0.966731	0.0332693	1.92128e-32	0	FALSE
PSMC3	4		0.741196		0.0909118		1		0.187184		0	0.200388	1.35941	0.92	5.71347e-12	0.076	0.347841	0.97	0.519292	0.310041	0.101103	0.106678	FALSE
PSMD8	4		1		0.0656012		1		2.01472		1		0.0401572		1		0.0434614		0.931772	0.03192	0.028218	0.0320236	FALSE
PSME1	4		0.772355		0.0735519		1		0.327789		1		0.274421		1		0.0301582		0.559138	0.19864	0.127658	0.089962	FALSE
PTGDS	4		0.691044		0.075959		0	0	3.18448	1	0	0	1.41674	1	1		0.0342794		0.902536	0.0832095	0.00732399	0.0783472	FALSE
PTGES3	4		1		0.228755		0	0.0560714	3.06203	0.98	1		0.178827		1		0.0305231		0.906578	0.0539893	0.0233828	0.095987	FALSE
PTMS	2		0.202802		0.432242		1		1.57689		1		0.204412		1		0.0476342		0.788812	0.197763	0.0134259	0.371481	FALSE
PTOV1	2		0.821061		0.102129		0.00621156	0.580685	1.2256	0.73	1		0.0497191		1		1.91779e-16		0.811274	0.188726	3.8808e-33	0	FALSE
PTP4A2	3		1		0.276064		1		0.0610647		1		0.320668		1		0.451382		0.497231	0.182623	0.146005	0.0417479	FALSE
PTPN6	2		0.384662		0.179575		1		1.30945		1		0.76043		0.412483		0.188275		0.722281	0.214393	0.0525736	0.107323	FALSE
PTTG1IP	3		0.713728		0.205102		1		2.18003		1		0.0254722		1		0.0656726		0.837281	0.105895	0.0492686	0.112772	FALSE
PWP1	2		1		0.182612		1		0.172937		1		0.0591995		1		2.97531e-17		0.596393	0.403607	5.74492e-33	0	FALSE
QARS1	4		1		0.186605		1		0.186506		1		0.00977392		1		4.75239e-17		0.949373	0.0506268	6.16831e-32	5.55112e-17	FALSE
RAB11A	2		1		0.057629		1		0.905754		1		0.303319		1		0.0441097		0.667397	0.320198	0.0124051	0.104701	FALSE
RAB2A	4		0.771641		0.0780005		1		2.23443		1		0.172109		1		0.020261		0.843822	0.0621668	0.0371843	0.0706518	FALSE
RABAC1	4		0.942281		0.169106		1		1.47781		1		0.0446982		1		0.071649		0.692584	0.121471	0.0783176	0.111376	FALSE
RAC1	4		1		0.0501744		1		0.0457793		1		0.00146645		1		5.61654e-17		0.964755	0.0352454	2.10285e-30	0	FALSE
RAD23A	3		0.279837		0.100435		1		1.47949		1		0.0154594		1		0.0159878		0.905264	0.0788014	0.0159343	0.162753	FALSE
RARRES1	3		0.741196		0.0847512		1		1.95011		1		0.118768		1		0.0587087		0.755706	0.164948	0.0516379	0.0950121	FALSE
RBIS	4		1		0.362384		1		0.013023		1		0.357892		1		0.0688323		0.669932	0.319039	0.0110288	0	FALSE
RBM25	3		1		0.277109		1		0.288044		1		0.252947		1		0.0930313		0.670422	0.207789	0.0629629	0	FALSE
RBM8A	4		1		0.172189		1		0.166707		1		0.046596		1		0.0014854		0.872777	0.108443	0.0187796	0	FALSE
RBP1	2		1		0.0596537		1		1.95627		1		0.00451644		1		0.0455924		0.95408	0.0274404	0.017107	0	FALSE
RBPJ	2		1		0.00984642		1		0.957702		0.577184		0.525895		1		0.219825		0.579009	0.203271	0.102285	0.00192763	FALSE
RBPMS	3		0.739109		0.128923		1		2.03956		1		0.282652		0.0183791	0.0974359	0.405204	0.96	0.587482	0.123452	0.0836715	0.142775	FALSE
RBX1	4		0.737486		0.0907397		1		2.42208		1		0.362638		1		0.143775		0.758603	0.105189	0.089686	0	FALSE
RDX	3		1		0.212113		1		1.37148		1		0.479794		1		0.110216		0.590351	0.285731	0.0588852	0.142654	FALSE
REEP3	3		1		0.0983971		0.00139	0	2.09631	1	1		0.0492251		4.21291e-05	0	0.332271	1	0.900414	0.0492064	0.0399012	0.102268	FALSE
REEP5	3		1		0.0665829		0	0	5.99029	1	2.731e-09	0.342478	0.985813	0.85	1		0.149592		0.908579	0.0626435	0.0206718	0.0189878	FALSE
RER1	3		1		0.0696733		1		0.0635991		1		0.000681043		1		2.59819e-17		0.957939	0.0420609	2.05752e-31	0	FALSE
RETN	2		1		0.0238284		1		1.56908		1		0.14309		1		0.135553		0.842443	0.0790994	0.0739764	0.109706	FALSE
REXO2	3		0.942503		0.109269		1		1.29181		1		0.0417282		1		0.16153		0.401703	0.270365	0.135103	0	FALSE
RFXANK	2		1		0.135033		1		2.19402		1		0.137708		1		0.0251914		0.941838	0.0511933	0.00579543	0.128853	FALSE
RGS16	2		1		0.0850874		1		0.0306997		1		0.02323		1		0.0155564		0.686315	0.291403	0.0198255	0	FALSE
RNASET2	3		1		0.37249		1		0.0214641		1		0.0722724		1		0.201493		0.508342	0.259021	0.106473	0.0103941	FALSE
RNF130	4		1		0.0781652		1		1.64957		1		0.328632		1		0.298625		0.568669	0.205115	0.18289	0.0175459	FALSE
RNF181	4		0.908994		0.319879		1		0.725081		1		0.929547		1		0.134352		0.563188	0.336747	0.047173	0.0233192	FALSE
ROMO1	3		1		0.075057		1		0.0684993		1		0.0558442		1		3.21247e-17		0.626334	0.373666	1.0633e-31	0.0913437	FALSE
RPL15	4		1		0.0255436		1		0.00144488		1		0.00129414		1		0.00152635		0.786641	0.120487	0.0662061	0	FALSE
RPL22	4		1		0.0355719		1		0.00635919		1		0.00870844		1		0.00119863		0.713963	0.277614	0.00766769	0	FALSE
RPL26	3		1		0.112997		1		0.00704282		1		0.0103558		1		0.00385427		0.894012	0.069961	0.0162752	2.77556e-17	FALSE
RPL27A	4		1		0.412222		1		0.0264247		1		0.423765		1		0.0135604		0.977963	0.0152932	0.00418354	0	FALSE
RPL29	3		1		0.178657		1		0.00577303		1		0.00612477		1		0.00699957		0.566829	0.153001	0.0703849	0	FALSE
RPL31	4		0.68288		0.0628885		0.768813		1.68933		1		0.102868		1		0.0427671		0.901326	0.0755798	0.0230941	0.0809289	FALSE
RPL41	4		1		0.123775		1		2.00406		1		0.0120481		1		0.00943944		0.940777	0.0399661	0.0117582	0.0381242	FALSE
RPL4	4		1		0.092221		1		0.00452753		1		0.00482421		1		0.00400305		0.68688	0.217669	0.0539134	0	FALSE
RPL5	4		1		0.071157		1		0.00430063		1		0.000811748		1		0.00191929		0.317853	0.230902	0.110542	0.000784717	FALSE
RPL7	4		1		0.00965879		1		0.00532921		1		0.00644738		1		3.73785e-16		0.999876	0.000124334	6.68201e-29	0	FALSE
RPL9	4		1		0.00560859		1		0.00583496		1		0.00403276		1		0.00455247		0.627312	0.125131	0.0937603	0.00304588	FALSE
RPLP0	4		1		0.197948		1		0.0879343		1		0.165881		1		0.00400013		0.788882	0.185	0.0261183	0	FALSE
RPN2	4		0.928897		0.10192		1		2.3299		0.0263878	0.465246	0.450963	0.78	0	0.24881	0.323602	0.89	0.853514	0.0870875	0.0394923	0.0726005	FALSE
RPP30	2		1		0.403893		1		0.399549		1		0.0611863		1		2.96308e-17		0.980422	0.0195781	1.48693e-33	0.0511909	FALSE
RPS15	4		1		0.00452135		1		3.53467		1		0.0628628		1		0.00136593		0.959606	0.0306256	0.00687062	0.00110204	FALSE
RPS23	4		1		0.0932335		1		0.00480646		1		0.00900363		1		0.00606086		0.420731	0.318413	0.135176	0	FALSE
RPS25	4		1		0.0852708		1		0.0854966		1		0.0844041		1		0.0151906		0.808683	0.169123	0.022194	0	FALSE
RPS26	4		1		0.00021699		1		0.00147507		1		0.00253225		1		0.00452425		0.981726	0.0133408	0.00493305	0	FALSE
RPS27L	4		0.220926		0.304543		1		0.220436		1		1.1338		1		0.0146429		0.881627	0.113792	0.00370914	0.0166325	FALSE
RPS29	4		1		0.023271		1		0.0011249		1		0.014124		1		0.0194117		0.9826	0.0154292	0.00197117	0	FALSE
RPS3A	4		1		0.0197286		1		0.00353762		1		0.00368736		1		0.000891411		0.364127	0.299651	0.203184	0	FALSE
RRBP1	3		0.537024		0.190519		0.588546		0.534794		1		0.486609		1		0.0735726		0.785072	0.172894	0.0420342	0.00939494	FALSE
RSL1D1	3		1		0.0494091		1		0.0427896		1		1.73088e-17		1		6.62025e-19		1	2.24228e-31	1.48356e-35	6.93889e-18	FALSE
RSRC2	3		0.448011		0.176396		1		1.7185		1		0.190288		1		0.221352		0.509042	0.111553	0.108178	0.0254015	FALSE
RTN4	3		1		0.263235		1		0.277541		1		0.126465		1		0.00370865		0.751966	0.241476	0.00655729	0.0179029	FALSE
RTRAF	2		1		0.153937		1		0.139392		1		0.0178098		1		1.42881e-17		0.775855	0.224145	3.2687e-32	0	FALSE
S100A10	3		1		0.0473394		1		0.00232819		1		4.79648e-05		1		0.00423571		0.626092	0.174706	0.158677	0	FALSE
S100A11	4		1		0.00342519		1		0.000157003		1		0.000381103		1		0.00033789		0.558317	0.440624	0.000749704	0	FALSE
S100A13	4		1		0.220781		1		0.0196894		1		0.00113284		1		0.0642765		0.663653	0.290635	0.0267553	0	FALSE
S100A4	4		1		0.0622606		1		0.00746346		1		0.0532129		1		0.0545782		0.916273	0.0423515	0.0136488	0	FALSE
S100A9	2		1		0.452158		1		4.83292		0.461507		2.48482		3.45405e-05	0	0.684026	1	0.473047	0.381736	0.0516145	0.5775	FALSE
S100P	2		1		0.0198811		1		0.0162328		1		5.69694e-17		1		1.60886e-18		1	3.94625e-30	7.39451e-35	3.46945e-18	FALSE
SAP18	4		1		0.119933		1		1.65667		1		0.0174451		1		0.00804052		0.964878	0.0289345	0.00618802	0.0636216	FALSE
SAT1	4		1		0.0524833		1		1.37347		1		0.185047		1		0.0136486		0.814275	0.14882	0.0218041	4.16334e-17	FALSE
SDHB	2		1		0.0446767		1		0.0327685		1		0.0205725		1		1.17252e-16		0.995971	0.00402905	4.58738e-31	0	FALSE
SEC11C	4		1		0.142373		0	0	1.90476	1	1		0.223734		1		0.187793		0.719806	0.116353	0.088799	0.0547122	FALSE
SEC61B	4		1		0.0617284		1		0.0534583		1		1.16727e-16		1		6.20983e-19		1	4.15266e-30	2.35241e-34	0	FALSE
SEC62	4		1		0.257275		1		0.0168336		1		0.00525482		1		0.000441496		0.489346	0.254537	0.166449	0	FALSE
SEM1	4		1		0.0297482		1		0.891403		1		1.29807		1		0.0425667		0.489459	0.455543	0.0295568	0.00939842	FALSE
SERBP1	3		0.422721		0.292925		0.97183		0.601027		1		0.205496		1		1.36757e-16		0.628292	0.371708	5.44536e-33	0	FALSE
SERF2-C15ORF63	4		1		0.0412893		1		2.37351		1		0.054627		1		0.0303021		0.903911	0.0356997	0.0314461	0	FALSE
SERP1	4		1		0.0419914		1		1.55282		1		0.00956351		1		0.00181652		0.911302	0.0855738	0.00312398	0	FALSE
SF3B2	4		1		0.266371		1		0.217491		1		2.61027e-16		1		2.61079e-17		1	1.19004e-30	1.35624e-60	5.55112e-17	FALSE
SF3B6	4		1		0.160102		1		0.0385197		1		0.135495		1		0.0763523		0.790878	0.19939	0.00973108	0	FALSE
SHARPIN	2		1		0.438993		1		0.396408		0.155151	0.86	0.159005	0.58	1		1.302e-17		0.976321	0.0236793	1.97336e-33	0	FALSE
SIVA1	4		1		0.13456		1		0.0331161		1		0.107275		1		0.0744116		0.924797	0.0591256	0.016077	0	FALSE
SKP1	4		1		0.0200767		1		0.00314827		1		0.0161991		1		0.00855387		0.929466	0.0664233	0.00411113	3.46945e-18	FALSE
SLC25A3	4		1		0.0520536		1		0.00970382		1		0.0465168		1		3.60844e-17		0.995167	0.00483321	2.96612e-33	0	FALSE
SLIRP	4		1		0.0615168		1		2.30117		1		0.0870575		1		0.0179946		0.896301	0.0746168	0.0243892	0	FALSE
SLPI	4		1		0.00930346		1		2.53319		1		0.0351583		1		0.0192952		0.977109	0.0116147	0.00861896	0.00447006	FALSE
SLTM	3		1		0.0540964		0.338741		2.25091		1		0.101202		1		0.11752		0.684985	0.0942124	0.0565382	0.0302837	FALSE
SMAP1	3		1		0.0885456		1		1.79672		1		0.0835229		1		0.0940446		0.714576	0.214935	0.0478626	0.0661863	FALSE
SNCG	3		1		0.109165		1		0.273667		1		0.320335		1		0.971684		0.573815	0.32145	0.0873143	0.243857	FALSE
SNF8	4		1		0.325789		1		0.0570818		1		0.000553581		1		0.0902392		0.619037	0.298984	0.0354238	0.0118063	FALSE
SNHG29	3		1		0.254501		1		0.987977		1		0.626231		1		0.088055		0.455499	0.213156	0.182985	0.16139	FALSE
SNRPD1	4		1		0.107833		1		0.0880451		1		6.01786e-17		1		5.29385e-18		1	3.00451e-31	5.03409e-63	1.38778e-17	FALSE
SNRPD3	4		0.646347		0.482481		0.389636		0.494327		1		0.0976642		1		5.22161e-17		0.92156	0.0784396	9.8367e-33	0	FALSE
SNRPF	4		1		0.000326352		1		0.0204999		1		0.0341461		1		1.57747e-17		0.724048	0.275952	1.89628e-31	4.87891e-18	FALSE
SNTB2	2		1		0.0187733		1		0.14007		1		0.109199		1		0.200194		0.798155	0.166431	0.0354145	0	FALSE
SNW1	3		1		0.364321		1		0.0878244		1		0.25793		1		0.306557		0.646453	0.321393	0.0321535	5.55112e-17	FALSE
SNX10	2		1		0.0563737		0.00450476	0.0560714	1.62823	0.98	0.339008		0.712345		1.55588e-08	0.11875	0.663107	0.95	0.522466	0.352891	0.0755951	0.00729226	FALSE
SNX6	3		0.388162		0.119431		1		2.18436		0.244711	0.3225	0.278491	0.14	1		0.0534721		0.73773	0.111928	0.074806	0.0604216	FALSE
SOD2	4		0.917097		0.097834		0	0	2.21833	1	1		0.865573		1.05888e-14	0.0279412	0.928345	0.99	0.524443	0.26253	0.108097	0.0623601	FALSE
SON	3		0.416725		0.139179		1		0.867912		1		0.807688		1		0.545695		0.430774	0.337768	0.148557	0	FALSE
SP100	3		1		0.204381		0.987911		1.46262		1		0.1813		1		0.392533		0.524403	0.175369	0.104965	0.130642	FALSE
SPARCL1	2		1		0.0639087		1		1.29706		1		0.447842		1		0.590604		0.543373	0.200005	0.126746	0	FALSE
SPCS2	2		1		0.0547832		1		0.0209619		1		0.046185		1		4.16439e-18		0.677876	0.322124	7.41779e-32	1.38778e-17	FALSE
SPRY1	2		1		0.0414665		1		0.00854565		1		0.0368764		1		1.16969e-17		0.98705	0.0129495	1.93876e-32	2.08167e-17	FALSE
SPTBN1	2		1		0.0870388		1		0.0772648		1		0.0185279		1		1.53403e-17		0.664329	0.335671	2.04395e-32	0	FALSE
SRI	4		0.667643		0.115657		0	0.946026	2.34293	0.53	0	0.396923	0.756345	0.82	0.0301003	0.341573	0.103661	0.84	0.666629	0.120474	0.103802	0	FALSE
SRM	2		1		0.113266		1		0.115373		1		0.0238565		1		7.54702e-18		0.989386	0.010614	9.94002e-33	2.77556e-17	FALSE
SRSF7	4		0.362478		0.150825		0.000646602	0.21907	1.34771	0.91	0.226479	0.178812	0.393447	0.93	8.20838e-08	0.280682	0.838797	0.87	0.472986	0.256818	0.18178	0.136943	FALSE
SSBP1	4		1		0.0575772		1		0.0573262		1		0.00700966		1		6.5527e-18		0.970772	0.0292284	3.20864e-32	0	FALSE
SSB	4		0.364286		0.121401		1		1.16262		1		0.00143385		1		0.058		0.823757	0.11229	0.0639522	0.0768751	FALSE
SSR3	3		0.931856		0.135848		1		0.741396		1		1.32803		1		0.00616154		0.647667	0.296838	0.0267493	0.302332	FALSE
STX8	2		1		0.0469215		1		2.44204		1		0.0321739		1		0.325961		0.856027	0.0774582	0.0555142	0.156038	FALSE
SUB1	4		0.956271		0.0662426		1		1.75343		1		0.128016		1		0.000391835		0.721395	0.179512	0.0620463	0.00553225	FALSE
SUDS3	4		1		0.130215		1		2.20695		1		0.0251463		1		0.00573835		0.955603	0.0268413	0.00962486	0.203041	FALSE
SURF1	4		1		0.053413		1		1.41466		1		0.00818466		1		0.00175709		0.969191	0.028967	0.0018424	0	FALSE
SYTL1	2		1		0.0635001		1		0.0447062		1		0.0320242		1		7.42873e-18		0.978365	0.0216352	1.66049e-32	0	FALSE
TACC1	3		0.382254		0.137779		8.46606e-07	0.0299048	1.98219	0.99	0.137329	0.137234	0.58041	0.95	1		0.163696		0.563738	0.187658	0.080514	0.158453	FALSE
TAF1D	4		0.649818		0.336885		0.00284754	0.174444	1.0819	0.93	0.00240283	0.159588	0.747766	0.94	1		0.613333		0.286566	0.254391	0.164737	0.0143765	FALSE
TAX1BP1	3		0.942281		0.189989		3.99669e-05	0.406619	1.97599	0.82	1		0.388535		1		0.174313		0.529086	0.296892	0.0805343	0.254036	FALSE
TBCA	4		0.515201		0.199088		1		1.41391		1		0.885971		1		0.00256832		0.723506	0.263903	0.00856716	0.182399	FALSE
TBCB	3		1		0.12356		1		0.100887		1		4.01297e-18		1		7.07455e-18		1	4.06498e-33	8.48528e-35	0	FALSE
TCF25	4		1		0.117744		1		1.43232		1		0.495464		1		0.143194		0.461138	0.204238	0.096635	0.0872497	FALSE
TCF4	2		1		0.167089		1		0.0120759		1		0.0131339		1		0.010685		0.59182	0.22996	0.0784758	0	FALSE
TECR	4		1		0.078371		1		0.0783394		1		0.00277312		1		3.21684e-17		0.963581	0.0364188	7.41637e-32	0	FALSE
TESC	4		0.222942		0.359107		5.80754e-09	0.0560714	3.2027	0.98	1		0.482036		1		0.0653072		0.780153	0.10408	0.0443608	0.288749	FALSE
TFPI	3		0.316716		0.238788		0.315692		0.550502		1		0.0534484		0.00184366	0.280682	0.340717	0.87	0.574718	0.278981	0.0538435	0.225123	FALSE
THBS4	2		0.9292		0.096465		1		0.34786		1		1.47885		1		0.020576		0.446874	0.20306	0.171703	0.102011	FALSE
THYN1	2		0.628501		0.217843		0.987911		0.20295		1		0.0304176		1		5.08788e-17		0.918018	0.0819816	4.96935e-33	0	FALSE
TIMP1	4		1		0.0161659		1		3.16228		2.28668e-05	0	0.288962	1	1		0.0399048		0.874574	0.073411	0.017444	0.00245667	FALSE
TKT	3		1		0.156311		1		0.0549507		1.16919e-09	0.362105	0.328598	0.84	1		0.0565178		0.887411	0.0392202	0.0369964	2.77556e-17	FALSE
TLN1	3		1		0.11587		1		0.418019		1		0.414883		1		0.0840936		0.761773	0.17559	0.0323327	0.0819534	FALSE
TM4SF1	3		0.512316		0.266223		1		2.03432		1		0.412586		1		0.299455		0.619558	0.169622	0.127999	0.220613	FALSE
TMA7	3		1		0.207146		1		0.169134		1		2.46157e-17		1		5.68064e-18		1	1.06919e-32	4.89465e-63	2.77556e-17	FALSE
TMBIM6	4		0.741196		0.0365082		1		0.118841		1		0.0133042		1		0.0462634		0.253618	0.165206	0.10178	0.0210988	FALSE
TMEM176A	2		1		0.0803203		1		2.40105		2.53066e-09	0.0318519	0.286599	0.99	1		0.0611779		0.931695	0.0362516	0.0200554	0.0865715	FALSE
TMEM40	2		1		0.0236122		1		0.0599713		1		0.0797989		1		0.150407		0.785977	0.203969	0.0100542	0	FALSE
TMEM50A	3		1		0.109764		1		0.0872448		1		0.0377425		1		2.93298e-18		0.983427	0.0165725	3.81771e-33	1.38778e-17	FALSE
TMEM59	4		1		0.102329		1		0.0391658		1		0.0432389		1		0.180987		0.704459	0.272918	0.0174963	0	FALSE
TMSB10	4		1		0.0251325		1		0.000661112		1		0.000478405		1		0.000857119		0.643905	0.101175	0.0931512	0	FALSE
TNFSF10	4		1		0.261392		1		0.734093		1		0.522379		0.363541	0.0279412	0.313349	0.99	0.525408	0.174759	0.143306	0.0253287	FALSE
TNFSF13B	2		1		0.189573		1		0.281833		1		0.0145848		1		0.0355339		0.755957	0.203441	0.0373007	0	FALSE
TNNT1	3		1		0.0166866		1		0.658976		1		1.69742		1		1.02934		0.623671	0.203031	0.142067	0.0298841	FALSE
TNNT3	2		1		0.199082		1		1.47723		1		0.408006		0.00705499	0.0279412	0.30548	0.99	0.651602	0.167083	0.0516733	0.0551783	FALSE
TNRC6B	2		1		0.10057		1		1.8234		1		0.18811		1		0.27043		0.837513	0.102938	0.0458214	0.158261	FALSE
TOMM7	4		1		0.0203277		1		2.3036		1		0.0682028		1		0.012357		0.955396	0.0260828	0.0102973	5.76974e-05	FALSE
TOP1	4		1		0.259563		1		0.399681		7.30311e-08	0	0.67278	1	1		0.0611077		0.532158	0.193911	0.116646	0.0489519	FALSE
TPM2	3		0.741196		0.344318		0.00017535	0	2.20636	1	5.69532e-06	0	0.731886	1	4.10761e-05	0	0.50109	1	0.460274	0.206085	0.0321236	0.00283882	FALSE
TPM4	4		1		0.042076		1		1.64109		1		0.280075		2.01707e-09	0.459341	0.500023	0.78	0.493776	0.352011	0.0766052	0.0537553	FALSE
TPR	3		1		0.21973		4.72994e-08	0.931871	1.31003	0.54	1		0.0885459		1		0.0777796		0.562775	0.274224	0.0913247	0.019212	FALSE
TRAM1	2		1		0.324443		1		0.0618325		1		0.231965		1		0.199874		0.622839	0.294748	0.0506782	0	FALSE
TRAPPC2L	4		1		0.338288		1		0.169819		1		0.31715		1		0.159209		0.594583	0.232917	0.166195	0.249888	FALSE
TREM1	2		0.188278		0.352734		2.09599e-06	0.341304	2.35952	0.85	1		0.132624		1		0.148545		0.804551	0.0718236	0.0398056	0.350693	FALSE
TRPT1	2		1		0.0559749		1		0.0505576		1		0.039555		1		0.140418		0.612925	0.223314	0.113448	2.08167e-17	FALSE
TSTD1	3		1		0.209972		1		0.180869		1		0.0634562		1		1.39083e-16		0.908728	0.0912721	4.27157e-31	0	FALSE
TXNIP	4		1		0.0736307		1		1.79897		1		0.357801		1		0.161567		0.565306	0.161555	0.0899914	0	FALSE
TXNL1	4		1		0.0052241		1		0.227485		1		0.324797		1		0.160636		0.487804	0.32722	0.0893925	0	FALSE
TYMP	4		1		0.0191221		1		0.00861173		1		0.0812377		1		0.00871606		0.426891	0.216048	0.16688	0	FALSE
TYROBP	3		1		0.0378918		1		2.28247		1		0.438804		1		0.426968		0.501247	0.214344	0.170857	0.133397	FALSE
TYW3	2		1		0.292068		1		0.29149		1		0.0216221		1		1.58886e-17		0.999259	0.000740899	7.29763e-33	5.55112e-17	FALSE
UBE2B	2		0.991984		0.11711		1		1.90804		0.165897	0.52439	0.264269	0.75	0.598124		0.179762		0.799035	0.0831166	0.0590919	0.350065	FALSE
UBE2D2	4		1		0.0199096		0	0.081913	2.31932	0.97	1		0.492354		1		0.158264		0.535312	0.177931	0.1582	0.0146519	FALSE
UBE2Q2	2		0.286251		0.188157		0.0150028	0	1.93851	1	0.136424	0.0869663	0.520323	0.97	0.338062	0.747872	0.471853	0.63	0.706327	0.193128	0.0711674	0.391105	FALSE
UBL5	4		1		0.0401366		0	0	3.27514	1	0	0	1.16648	1	1		0.0446578		0.811358	0.139198	0.0182898	0.0179769	FALSE
UBXN1	4		1		0.0976013		1		1.05492		1		1.35321		1		0.017907		0.702984	0.272311	0.0101593	0.0179575	FALSE
UBXN4	4		0.367672		0.261409		1		0.134838		1		0.44911		1		0.770651		0.506768	0.236861	0.183154	0.144442	FALSE
UCHL3	3		0.829185		0.110067		1		1.46001		1		0.0936804		1		0.0133427		0.765992	0.227306	0.00670167	0.0961787	FALSE
UFD1	4		1		0.0747824		1		0.0683144		1		0.0112531		1		5.38714e-05		0.666636	0.331601	0.00176319	1.38778e-17	FALSE
UQCC2	3		1		0.0199545		1		2.15478		1		0.134092		1		0.00942499		0.931351	0.0623895	0.00396004	0	FALSE
UQCR11	4		1		0.00507857		1		2.42031		1		0.0151624		1		0.00732016		0.984034	0.0102644	0.00535432	0.000299345	FALSE
UQCRH	4		1		0.042786		1		0.00411597		1		0.0405168		1		0.000570136		0.974752	0.0204552	0.00208188	0	FALSE
UQCRQ	4		0.887328		0.0842871		1		1.71617		1		0.112643		1		0.0833828		0.561925	0.284814	0.129179	0	FALSE
UROD	2		1		0.133131		1		0.13273		1		0.020461		1		5.1687e-17		0.999384	0.000616332	6.00816e-33	0	FALSE
UVRAG	3		1		0.160116		1		1.42049		1		0.118812		1		0.103991		0.751846	0.169752	0.0656627	0.0707202	FALSE
UXT	4		0.20755		0.0865354		1.15519e-05	0.0299048	2.38348	0.99	1		0.0167268		1		0.00106349		0.824394	0.0708605	0.0582014	0.0837692	FALSE
VIM	4		1		0.0235488		1		1.96029		1		0.475414		1		0.18716		0.57197	0.131757	0.0775078	0.010966	FALSE
VPS28	4		0.286251		0.0862381		1		1.86525		1		0.0147607		1		0.000278196		0.935585	0.055715	0.00870039	2.08167e-17	FALSE
VWF	2		1		0.00561746		1		0.00959409		1		0.0170065		1		0.0429019		0.670551	0.315476	0.0120491	0	FALSE
WASHC3	3		1		0.369503		0.0291691	0.423121	1.27973	0.81	1		0.311828		0.404764		0.221815		0.782267	0.198871	0.0188617	0.440041	FALSE
WBP4	2		1		0.0680624		1		1.71081		1		0.102244		1		0.121983		0.705416	0.101657	0.0897642	0.0175415	FALSE
WFDC21P	2		0.933753		0.0961117		0.974429		0.633241		1		0.156282		1		0.246808		0.649584	0.236712	0.113704	0	FALSE
YBX3	4		0.788409		0.254637		5.68925e-05	0	1.86181	1	1		0.413558		0.00437426	0.0279412	0.831245	0.99	0.58397	0.19125	0.0883651	0.0507815	FALSE
YIF1A	3		1		0.271066		1		0.19026		1		0.118061		1		0.105324		0.770964	0.169455	0.0595813	5.55112e-17	FALSE
YWHAB	4		1		0.236616		1		0.00758267		1		0.0060317		1		0.0102618		0.59792	0.363223	0.0293581	0	FALSE
ZBTB8OS	3		1		0.214894		1		1.76457		0.35976		0.749559		1		0.231514		0.452449	0.237946	0.100635	0.017267	FALSE
ZC3H15	4		0.278955		0.652596		0.452621		0.708561		1		0.0485546		1.27947e-09	0.206024	0.639282	0.91	0.784873	0.156568	0.0541493	0	FALSE
ZCCHC17	2		1		0.24447		1		0.220848		1		0.200729		1		0.179001		0.797817	0.191184	0.00885981	0	FALSE
ZFAND5	3		1		0.188563		1		0.0880711		0.000433101	1	0.995565	0.5	1		0.186456		0.84072	0.103939	0.0237907	0.278011	FALSE
ZNHIT1	3		1		0.237082		1		0.234748		1		0.0365924		1		1.1469e-16		0.811126	0.188874	9.66052e-32	5.55112e-17	FALSE
ZRANB2	3		1		0.103418		2.69693e-06	0.174444	0.824149	0.93	0.0621684	0.289346	0.476473	0.88	1		0.223543		0.331263	0.299178	0.257121	0	FALSE
unknown_chr6_GL000256v2_alt_4000000	4		1		0.115951		1		0.0118609		1		0.0133927		1		0.00559637		0.481506	0.25591	0.0873099	1.38778e-17	FALSE
unknown_chr6_GL000256v2_alt_4e+06	2		1		0.0851988		1		0.00841063		1		0.00804797		1		0.00892746		0.65658	0.286506	0.027973	1.38778e-17	FALSE

## Sheet: table3C
geneR1A_uniq	num_onts	sub_col	chi2_pval_adj_scZ	perm_pval_adj_scZ	max_abs_median_scZ	perm_cdf_scZ	chi2_pval_adj_svd_z0	perm_pval_adj_svd_z0	max_abs_median_svd_z0	perm_cdf_svd_z0	chi2_pval_adj_svd_z1	perm_pval_adj_svd_z1	max_abs_median_svd_z1	perm_cdf_svd_z1	chi2_pval_adj_svd_z2	perm_pval_adj_svd_z2	max_abs_median_svd_z2	perm_cdf_svd_z2	f0	f1	f2	gene_max_diff	sig
A2M	4		0.0607564	0	0.486617	1	0	0	2.11989	1	1.03035e-12	0	1.12131	1	1		0.164473		0.447389	0.155537	0.140916	0.38723	FALSE
MEST	3		0.00162218	0	0.300143	1	0	0	3.76019	1	0	0	2.04998	1	7.63718e-10	0	0.78124	1	0.606638	0.260752	0.104603	0.476553	TRUE
METTL22	4		0.00122134	0	0.323491	1	8.80995e-05	0	1.21371	1	0.0161709	0.527539	0.830747	0.78	0.014622	0.083524	0.447889	0.98	0.347196	0.265923	0.184978	0	FALSE
METTL8	3		0.000980525	0	0.625433	1	0.289426		0.42586		0.0158969	0	1.08514	1	0.274647	0.214202	0.35683	0.93	0.291337	0.20199	0.154662	0	FALSE
METTL9	4		2.06196e-06	0	0.183721	1	1		2.05068		0	0	0.8737	1	1		0.241706		0.61058	0.257608	0.0867843	0	FALSE
MFF	4		0.0140784	0	0.118708	1	4.71128e-09	0	1.76299	1	0	0	0.671859	1	0	0	0.794155	1	0.344583	0.301822	0.108874	0	FALSE
MFSD2A	3		0.00226026	0	0.283213	1	0	0	5.14174	1	0.648441		0.490264		1		0.223367		0.746007	0.0849191	0.036964	3.84209	TRUE
MGME1	4		3.69956e-12	0	0.790434	1	1.05136e-06	0	1.54468	1	7.01965e-07	0.0471625	0.923338	0.99	1		0.367022		0.471644	0.240044	0.108172	0	FALSE
MGST3	4		0.048325	0	0.0695185	1	1		2.84329		1		0.0681695		1		0.00427331		0.79342	0.0584659	0.0452312	0	FALSE
MIA2	4		0.000654066	0	0.192555	1	0.0887475	0.957583	1.84676	0.53	0.0306536	0.0471625	0.743554	0.99	1.28472e-05	0	0.47088	1	0.410408	0.177954	0.0907315	0	FALSE
MIA3	4		5.76709e-06	0	0.628281	1	2.41735e-05	0.170763	0.792198	0.96	0.328928		0.294648		0.187328	0.40366	0.227384	0.84	0.421967	0.164835	0.132357	0	FALSE
MICAL2	2		1.04715e-06	0	1.38904	1	1		0.0228408		0.937204		0.290445		1		0.143195		0.297967	0.261159	0.146282	1.49197	FALSE
MIPOL1	3		1.55029e-06	0	0.613378	1	3.67124e-07	0.25857	1.34729	0.93	0.31105		0.739412		1		0.137188		0.385317	0.220016	0.0955426	0	FALSE
MKI67	2		0.0620526	0	0.389342	1	0.977649		0.62509		0.415208		0.481434		0.0383284	0.30236	0.897103	0.89	0.43009	0.28434	0.242664	0	FALSE
MED15	4		0.0393504	0	0.381495	1	0.200646		1.02477		1		0.0310897		1		0.456259		0.359638	0.262534	0.126188	0.514804	FALSE
MMP24-AS1-EDEM2	4		0.0745324	0	0.224068	1	0	0	1.26462	1	1		0.127182		1		0.142314		0.403728	0.104333	0.085533	0.0707876	FALSE
MMRN2	4		1.37736e-07	0	0.602796	1	1		0.320812		1		0.0677245		1		0.1711		0.222086	0.198758	0.106923	0	FALSE
MPP7	2		0.00883996	0	0.596681	1	1		0.585296		0.0445556	0	0.310724	1	1		0.145982		0.520277	0.155029	0.072068	0	FALSE
MPZL1	4		0.000231921	0	0.363052	1	0	0	2.36451	1	1.32757e-05	0.0471625	1.47108	0.99	1		0.122977		0.564797	0.327775	0.0425287	0	FALSE
MRPL33	4		0.000381068	0	0.083564	1	0	0	1.22518	1	0	0	0.754668	1	1		0.119029		0.552531	0.310383	0.0551098	0	FALSE
MRPL55	4		4.23477e-10	0	0.695642	1	0	0	1.40867	1	1		0.112463		1		0.212703		0.373415	0.264429	0.125269	0	FALSE
MRPS21	4		0	0	0.421178	1	1		2.41239		1		0.0120688		1		0.0293018		0.819206	0.126853	0.0283156	0	FALSE
MRTFA	4		0.00322345	0	0.295792	1	0.000816255	0.230835	1.82994	0.94	0.0625596	0.14656	0.368516	0.96	1		0.133413		0.520281	0.212956	0.0898025	0.0955844	FALSE
MST1	2		4.02622e-06	0	0.950681	1	1		0.316704		4.34492e-06	0	0.808254	1	1		0.208614		0.357519	0.269423	0.12565	0.233128	FALSE
MT1G	4		0	0	1.01809	1	0.0317669	0.499587	0.936528	0.82	0.00798274	0.0471625	0.888738	0.99	1		0.110785		0.44087	0.172447	0.0788327	0	FALSE
MTFR1	3		0	0	1.2179	1	0	0	1.72613	1	0.0016791	0	0.488893	1	1		0.0345977		0.535411	0.166323	0.0562588	0	FALSE
MTIF3	4		6.32679e-06	0	0.30637	1	0.913695		1.94831		1.5595e-11	0.0471625	1.01265	0.99	0.593912		0.385173		0.600388	0.24617	0.0608082	0	FALSE
MVB12B	2		0.0358594	0	0.891953	1	0.00909976	0	0.943223	1	1		0.0265956		1		0.0325725		0.688354	0.144825	0.0641277	0	FALSE
MYCBP2	4		0.000244203	0	0.26901	1	2.97927e-07	0.0566409	0.633776	0.99	1		0.0468844		1		0.0395059		0.183395	0.166153	0.13051	0.0469445	FALSE
MMP24OS	3		1.07387e-10	0	1.33268	1	4.59906e-13	0	1.29643	1	1		0.036118		1		0.0210574		0.730729	0.181464	0.0446529	0	FALSE
MDK	4		0.00854678	0	0.301137	1	4.07262e-08	0	1.12388	1	0	0	1.99448	1	0	0	1.60018	1	0.397724	0.36016	0.10526	0	FALSE
MBP	4		0.0501004	0	0.736128	1	2.16953e-12	0	1.77494	1	0.0139507	0	0.330078	1	0.00433267	0	0.349515	1	0.427296	0.217887	0.109308	0	FALSE
MBD2	4		8.72939e-12	0	0.641957	1	0	0	2.27832	1	1.11423e-13	0.224022	0.650701	0.93	2.23475e-14	0	0.288985	1	0.797282	0.104923	0.037745	0	FALSE
LOC105370217	4		1.24697e-06	0	0.315753	1	2.60043e-06	0	0.257811	1	1		6.18492e-18		1		3.53302e-19		1	3.39089e-33	2.54613e-33	0.284369	FALSE
LOC105372437	2		0	0	3.105	1	0	0	5.70838	1	3.30662e-07	0	0.752874	1	2.97726e-13	0	0.783988	1	0.396129	0.169403	0.0875145	0	TRUE
LOC105373786	4		0.00125377	0	0.180639	1	1		0.223004		1		0.0548025		1		0.576864		0.225358	0.200561	0.138742	0.0896934	FALSE
LOC105375545	4		0.212427	0	0.110971	1	2.4175e-09	0.0566409	3.28877	0.99	1		0.00124413		1		0.0728		0.771518	0.0868293	0.0459285	0	FALSE
LOC105376392	4		0	0	0.658728	1	0	0	2.44895	1	0	0	1.54785	1	1		0.0444933		0.768726	0.145568	0.038908	0	FALSE
LOC105377663	4		0	0	0.746925	1	0	0	1.83026	1	0	0	0.8116	1	1		0.103412		0.320635	0.20682	0.108793	0	FALSE
LOC105378083	2		0.00156681	0	0.864188	1	0	0	0.963012	1	1		0.418282		1		0.0554104		0.291522	0.218621	0.122077	0.0860849	FALSE
LOC112267867	3		0	0	0.925626	1	0	0	1.0159	1	1		0.0171631		1		0.0235619		0.43102	0.11384	0.070524	0	FALSE
LPIN2	4		0.0117195	0	0.494059	1	0	0	1.61517	1	1		0.335596		1		0.23792		0.556557	0.172985	0.103161	0	FALSE
LRCH4	3		0	0	0.801811	1	0	0	1.34383	1	0	0	0.857642	1	1		0.0929117		0.515326	0.229791	0.0935814	0	FALSE
LRIF1	4		0	0	2.73044	1	0	0	3.66341	1	0	0	0.868313	1	0.347941	0	0.0892442	1	0.498022	0.198491	0.080925	0	TRUE
LRMDA	4		1.15896e-06	0	0.519336	1	0	0	1.44157	1	0	0	1.53051	1	1		0.338305		0.432555	0.234895	0.0745023	0	FALSE
LRP1	3		0.025113	0	0.345658	1	0	0	2.07097	1	1		0.106145		1		0.113797		0.343688	0.0768344	0.0662063	0.402985	FALSE
LRRK2	4		0.0323373	0	0.591696	1	0	0	2.61335	1	1		0.0407405		1		0.12323		0.447095	0.0882108	0.0713819	1.9147	FALSE
LSP1	3		0	0	0.255468	1	0	0	3.69358	1	0	0	2.79946	1	0	0	0.910199	1	0.481344	0.229274	0.0518841	0.452591	TRUE
LTBP4	4		0.00242995	0	0.367247	1	0.0126568	0.0993222	0.820064	0.98	1		0.295878		1		0.0815188		0.369213	0.183878	0.0990781	0	FALSE
LYAR	4		0	0	0.610031	1	0	0	1.20811	1	0	0	1.5038	1	0	0	0.736694	1	0.515712	0.333874	0.0721502	0	FALSE
LYRM4-AS1	4		0	0	0.792665	1	0	0	1.47485	1	1		0.0498942		1		0.00894159		0.665764	0.233684	0.0326365	0	FALSE
LYST	4		4.17939e-08	0	0.405459	1	1		0.0268606		0.394189		0.292122		1		0.135455		0.248987	0.156351	0.112552	0	FALSE
MACF1	4		7.82777e-05	0	0.385855	1	1		0.158897		0.0168162	0	0.337961	1	3.68669e-05	0	0.295743	1	0.310749	0.120694	0.0906932	0	FALSE
MACROH2A2	3		0.135777	0	0.553414	1	0	0	2.69596	1	0.000179549	0	1.0809	1	1		0.286304		0.697824	0.176743	0.0398286	2.54964	FALSE
MAN1A1	4		0.171421	0	0.393168	1	0.113101	0	1.05061	1	0.101018	0.0471625	0.397333	0.99	1		0.198976		0.510626	0.116601	0.103082	0.550826	FALSE
MAP2K6	3		0.00377411	0	0.289564	1	1		1.36653		0	0	2.07573	1	1		0.111559		0.393198	0.329745	0.0802236	0	FALSE
MAP3K7	4		0.126514	0	0.185237	1	0	0.170763	2.62149	0.96	0.170919	0	0.665991	1	1		0.162858		0.596252	0.220396	0.0589186	0	FALSE
MAPKAPK5-AS1	4		2.45861e-05	0	0.570518	1	0.0289453	0.0993222	0.883879	0.98	0	0	1.52231	1	1		0.19669		0.525714	0.342444	0.0482211	0	FALSE
2021-03-02	4		0.00369779	0	0.757845	1	2.19276e-06	0.0993222	2.22388	0.98	0.000651305	0	1.38538	1	0.22211	0	0.431088	1	0.580259	0.1843	0.0959078	1.2936	FALSE
MARK3	4		0.00187598	0	0.301045	1	0.914814		1.1749		5.48855e-10	0	0.762473	1	0.000207153	0	0.254377	1	0.42585	0.184909	0.10286	0	FALSE
MAST4	4		0.066487	0	0.30319	1	0.026291	0.915909	0.799593	0.56	0.0172919	0	0.431652	1	1		0.132005		0.246549	0.189914	0.112256	0	FALSE
MASTL	3		0.057641	0	0.353108	1	2.31643e-08	0.356494	1.8475	0.89	0.583097		0.384042		1		0.162928		0.415354	0.20654	0.130956	0	FALSE
MYL6	4		0	0	0.420572	1	0	0	2.69921	1	0	0	1.90936	1	0	0	0.322983	1	0.695974	0.226336	0.0395181	0.780867	FALSE
MYLIP	4		2.32583e-05	0	0.354014	1	4.01979e-07	0.534129	1.93194	0.8	1		0.524063		0.174242	0.0469097	0.309053	0.99	0.596655	0.159924	0.0850841	0	FALSE
MYO18A	3		8.54233e-06	0	0.586715	1	0	0	1.51422	1	1.2498e-06	0	0.753538	1	1		0.0390456		0.476276	0.250917	0.0759612	0	FALSE
MYO1G	2		0.0167949	0	0.630243	1	1		1.03524		4.71542e-08	0.0471625	1.31535	0.99	0.298718	0.16679	0.426664	0.95	0.569295	0.190967	0.0802428	0	FALSE
PAK1	3		0.00301617	0	0.365274	1	2.26509e-05	0.202309	0.932811	0.95	0	0	1.50961	1	1		0.093692		0.475218	0.201777	0.10754	0	FALSE
PALM2AKAP2	4		0.000153348	0	0.715281	1	0.0154274	0	0.520168	1	0.00152516	0	0.295668	1	0.960965		0.218809		0.494051	0.219425	0.0910527	0	FALSE
PAPSS2	4		0.000694041	0	1.0719	1	0.00648326	0.0566409	1.17766	0.99	1		0.0881693		1		0.234286		0.354859	0.171322	0.105069	0	FALSE
PARK7	4		0.000199262	0	0.0935064	1	0	0	2.06711	1	0	0	1.98335	1	1		0.0136736		0.485315	0.376762	0.0283669	0	FALSE
PARP4	4		0	0	0.890328	1	1		0.720042		0	0	1.14647	1	1		0.38031		0.341219	0.223781	0.112616	0	FALSE
PARP6	4		0.0189325	0	0.272784	1	0.645419		1.88126		1		0.367967		0.114517	0.538994	0.622664	0.77	0.460559	0.138696	0.115553	0	FALSE
PATZ1	2		0.00325471	0	0.44385	1	1		0.150509		0.439502		0.23465		1		0.349307		0.455717	0.239313	0.109101	0	FALSE
PCBP3	3		0.0216434	0	0.639953	1	5.87898e-07	0	2.06093	1	0.742596		0.558288		1		0.29766		0.356989	0.171317	0.160075	0.602553	FALSE
PCOLCE	3		0.0083826	0	0.402889	1	0	0	3.29456	1	1		0.0421258		1		0.109482		0.756667	0.0324361	0.02714	0	FALSE
PCSK7	4		1.01787e-09	0	0.480596	1	1.82219e-08	0	0.848297	1	1		0.0490088		0.142831	0.0469097	0.21966	0.99	0.503063	0.111444	0.061676	0	FALSE
PDCD5	4		1.58782e-09	0	0.153657	1	0.557198		3.30211		0	0	0.470956	1	0	0	0.545541	1	0.748908	0.136688	0.0570704	0	FALSE
PDE12	4		3.59779e-09	0	0.292456	1	0.17726		0.878711		1		0.0879735		0	0	0.548532	1	0.306159	0.137263	0.125234	0	FALSE
PDE2A	2		0	0	1.27049	1	0	0	1.78521	1	0	0	1.26263	1	1		0.091307		0.423065	0.184688	0.16125	0.0248855	FALSE
PDE4D	4		0	0	0.762853	1	0	0	0.930317	1	1.47011e-13	0	0.652335	1	0.00349973	0	0.279003	1	0.253086	0.124705	0.0890914	0	FALSE
PDLIM2	4		0.00465997	0	0.426628	1	0.0015648	0	2.31887	1	1.33548e-05	0.117771	0.753704	0.97	1		0.260509		0.503578	0.232983	0.102694	0	FALSE
PECAM1	3		0.000245248	0	0.211	1	0	0	4.26043	1	0.651679		0.480402		0.000276725	0	0.341212	1	0.592989	0.0949293	0.0753246	0	TRUE
PFDN5	4		0.160808	0	0.147689	1	1		2.78553		1		0.104315		1		0.0346012		0.744473	0.114042	0.0397853	0	FALSE
PGLS	4		0.00414086	0	0.151612	1	1		2.57955		1		0.054446		1		0.0542445		0.855164	0.0645176	0.0449578	0	FALSE
PGS1	4		0.0573675	0	0.145307	1	0	0	2.33984	1	3.9067e-05	0.394073	0.782614	0.85	0.859919		0.493911		0.430466	0.174355	0.114357	0	FALSE
PHACTR4	4		0.258741	0	0.16283	1	9.93182e-09	0.0566409	1.12047	0.99	0.805234		0.239737		0.410343	0.16679	0.461521	0.95	0.460314	0.191294	0.109302	0	FALSE
PIGQ	2		1.38261e-08	0	0.895368	1	1.65739e-10	0	1.75936	1	1		0.463876		1		0.250022		0.610197	0.210765	0.089424	0	FALSE
PIK3R1	4		7.91552e-06	0	0.161305	1	0	0	1.97862	1	0	0	0.47445	1	1		0.100281		0.560325	0.142074	0.0881248	0	FALSE
PIP4K2A	3		0.0473135	0	0.636686	1	0.0133044	0.787329	1.75791	0.65	1		0.377294		1		0.308894		0.622132	0.143318	0.0815586	0	FALSE
PKIG	4		1.52364e-06	0	0.190688	1	0	0	2.34888	1	0	0	2.03611	1	1		0.043452		0.528734	0.341747	0.0497183	0	FALSE
PLA2G2A	2		0.0801309	0	0.042188	1	0.32011		2.8288		1		0.350633		1		0.0554223		0.713996	0.0504423	0.0239203	0.288575	FALSE
PLAAT2	2		1.83859e-05	0	1.10077	1	0.116294	0.534129	0.457605	0.8	0.00186014	0	0.40773	1	0.00194531	0	0.856365	1	0.560054	0.164153	0.128241	0	FALSE
PLAUR	4		0.0916893	0	0.107993	1	0	0	3.11419	1	1		0.288686		1		0.150641		0.654244	0.115074	0.0792817	0.0614657	FALSE
PLBD1	4		0.0675659	0	0.391622	1	0	0	3.28919	1	1		0.12909		1		0.0955311		0.917832	0.0388272	0.0236359	0	FALSE
PLD1	4		6.77904e-07	0	0.60511	1	0	0	1.65399	1	5.85511e-05	0.332867	1.35223	0.88	1		0.136808		0.393348	0.274555	0.0597896	0	FALSE
OXR1	4		0.00491543	0	0.49459	1	0.0883349	0.845	1.04382	0.61	0.432411		0.168989		1		0.235272		0.309347	0.160086	0.135048	0	FALSE
LOC105369748	4		2.13148e-06	0	1.06991	1	5.52172e-07	0	1.12629	1	1		0.482451		0.00353058	0.0469097	1.18154	0.99	0.396661	0.213501	0.165873	0	FALSE
OXNAD1	4		0.0749919	0	0.146053	1	0	0	1.15048	1	0.00172933	0	0.564223	1	0	0	0.705862	1	0.419977	0.161305	0.104428	0	FALSE
OAS2	3		0.00266589	0	0.88135	1	2.33966e-05	0.333886	1.99501	0.9	0.000141558	0	0.736443	1	1		0.127051		0.61217	0.162995	0.0947204	1.56109	FALSE
NAA20	4		0.000208605	0	0.264049	1	1.23146e-10	0.0566409	2.32095	0.99	0	0	0.834647	1	0	0.083524	0.204585	0.98	0.610217	0.228923	0.0334268	0	FALSE
NABP1	4		0.192263	0	0.163378	1	0	0	2.55457	1	1		0.503257		1		0.144651		0.546069	0.266682	0.0897068	0	FALSE
NACA	4		1.9163e-08	0	0.153675	1	0.614091		3.3779		1		0.0513809		1		0.0362625		0.80141	0.131732	0.0376783	0	FALSE
NCALD	4		0	0	1.38554	1	0	0	1.49169	1	3.27239e-05	0	1.02783	1	0.00234734	0	0.616676	1	0.231379	0.215197	0.130144	0	FALSE
NCK1	4		0.00543693	0	0.282236	1	1		0.347514		0.106323	0.0853416	0.560528	0.98	1		0.360802		0.319352	0.210686	0.126269	0	FALSE
NCOA7	4		2.31912e-06	0	0.356039	1	0	0	1.85073	1	1		0.235218		0	0	0.541716	1	0.318837	0.157489	0.0981919	0	FALSE
NCOR1	4		0.224457	0	0.11307	1	0.0584576	0.440598	2.15398	0.85	1		0.274003		1		0.328145		0.430184	0.213955	0.0693558	0	FALSE
NDEL1	4		0.00340233	0	0.227235	1	2.31248e-10	0	2.43536	1	2.5994e-06	0	1.07263	1	0.0717103	0.083524	0.270968	0.98	0.587337	0.230523	0.07469	0	FALSE
NDUFA1	4		0.276866	0	0.0447511	1	1		1.88718		1		0.0524481		1		0.00902537		0.945607	0.0435184	0.00739826	0	FALSE
NDUFV3	4		1.39397e-08	0	0.925077	1	0	0	2.00515	1	1		0.320835		1		0.0588775		0.646709	0.243488	0.0631428	0	FALSE
NECAP1	4		0	0	0.955256	1	0	0	1.89719	1	1.555e-09	0	0.88739	1	0	0	0.310836	1	0.697506	0.181836	0.0418201	1.6245	FALSE
NEXN	4		0	0	1.29708	1	1.81687e-10	0.170763	1.16001	0.96	0.0127773	0.0471625	0.506744	0.99	0.0247727	0	0.940139	1	0.432339	0.196799	0.113152	0.0915705	FALSE
NFKBIZ	4		0.000486913	0	0.325381	1	0	0	2.52233	1	0.000141558	0	0.497184	1	0	0	0.462501	1	0.661789	0.191243	0.0596806	0	FALSE
NFU1	4		7.52555e-06	0	0.298078	1	1		2.20601		0	0	0.918044	1	0	0	0.673734	1	0.635491	0.225263	0.0644676	0	FALSE
NINJ2	4		0.218083	0	0.164475	1	0	0	1.87038	1	1		0.34278		1		0.0379712		0.723819	0.101717	0.0592764	0	FALSE
NIN	4		0.123178	0	0.501225	1	0.627836		0.688525		0.186187	0.0471625	0.631814	0.99	0.930962		0.272165		0.371899	0.11406	0.0960879	0	FALSE
NMD3	4		0.00610515	0	0.298895	1	0.0593337	0.308812	2.26036	0.91	0.226703	0	0.265362	1	1		0.110424		0.539561	0.150258	0.119863	0	FALSE
NMT1	4		0	0	1.08071	1	3.49502e-08	0.0993222	1.37389	0.98	0	0	1.02754	1	1		0.0659225		0.643446	0.157354	0.0783442	0	FALSE
NOC4L	4		7.33264e-07	0	0.928953	1	0	0	2.95174	1	0.0439957	0	0.363389	1	1		0.0990304		0.485738	0.139855	0.0970641	0	FALSE
NOP53	4		0.0402665	0	0.16115	1	0	0	3.19569	1	1		0.537152		8.05494e-07	0	0.374151	1	0.505132	0.149995	0.0616928	0	FALSE
NPC1	4		3.96294e-06	0	0.336036	1	1		1.20052		0.0457664	0	0.404915	1	1		0.0504687		0.278014	0.21087	0.0805149	0	FALSE
NQO2	4		6.60191e-06	0	0.276234	1	0	0	3.1231	1	0.00079659	0	0.6421	1	1		0.00858722		0.61978	0.153572	0.061449	0	FALSE
NR2C2AP	4		3.6625e-14	0	1.68978	1	0	0	2.0941	1	1		0.189943		1		0.0660053		0.769368	0.143795	0.0453341	0	FALSE
NR4A1	4		0.111336	0	0.158622	1	0	0	3.12282	1	1		0.469915		1		0.515712		0.470909	0.0895555	0.0707283	0.922293	FALSE
NR4A2	4		0.130672	0	0.220777	1	1.66654e-11	0	1.73133	1	0.00543706	0.0471625	0.414783	0.99	1		0.189772		0.340675	0.251327	0.157505	0	FALSE
NRDC	4		1.26364e-07	0	0.267245	1	0.680792		0.924847		0	0	0.74158	1	1		0.0964792		0.476537	0.187501	0.11423	0	FALSE
NSMCE2	4		0.191068	0	0.114935	1	0.00173512	0.690313	1.90862	0.71	0.0618789	0.0853416	0.498238	0.98	4.56932e-10	0	0.44337	1	0.500677	0.19163	0.109409	0.525002	FALSE
NSUN6	4		0.00344284	0	0.2608	1	9.92575e-07	0.481448	0.874875	0.83	1.98646e-07	0	0.740819	1	1		0.157983		0.316417	0.165284	0.104045	0	FALSE
NUP214	4		0.0143232	0	0.307229	1	9.82283e-07	0	0.76454	1	1		0.0809282		1		0.0135224		0.323141	0.210221	0.0922591	0	FALSE
OSGEPL1	3		0.250801	0	0.392521	1	0.0126916	0.534129	1.52765	0.2	1		0.312826		1		0.220656		0.431895	0.22668	0.163566	0	FALSE
PLD3	4		0.0981895	0	0.117006	1	0	0	1.54057	1	0	0	1.31431	1	0	0	0.987141	1	0.493916	0.170138	0.11589	0	FALSE
LOC102723340	4		0.00131981	0	0.515304	1	0.00343738	0.308812	1.38933	0.91	0.000116602	0	0.381475	1	1		0.325517		0.895948	0.0581714	0.0455559	0	FALSE
LOC101928100	2		0	0	8.61197	1	1.90878e-13	0	9.57418	1	0.0094484	0	0.529157	1	1		0.236074		0.443534	0.273957	0.117646	9.55666	TRUE
GAB1	4		0.00023671	0	1.05692	1	0.00311592	0.0566409	1.14174	0.99	0.0712244	0	1.08893	1	0.93004		0.38805		0.320866	0.269371	0.134913	0	FALSE
GABARAPL2	4		2.30732e-09	0	0.250037	1	0	0	1.93074	1	0	0	0.782634	1	0	0	0.447492	1	0.722023	0.191195	0.0618101	0	FALSE
GALNT15	3		0.00160905	0	0.20504	1	7.09825e-15	0	3.60953	1	0	0	0.502001	1	1		0.0603574		0.690057	0.0846797	0.0448748	1.00521	TRUE
GALNT3	2		0	0	0.824379	1	0.989502		0.151289		1.21678e-08	0	0.75717	1	0.0706157	0.364783	0.154699	0.86	0.508059	0.189173	0.120612	0.785642	FALSE
GDPD3	2		0.000324917	0	1.16015	1	0.000183322	0	1.86544	1	0.377263		0.496759		1		0.246366		0.637222	0.19531	0.0863141	0	FALSE
GLYCTK	2		0.00695247	0	0.526833	1	0.51182		0.351142		0.298216		0.585102		1		0.0514347		0.667846	0.172101	0.0548762	0	FALSE
GMDS	4		0.0104411	0	0.383245	1	0	0	2.69601	1	0.00173874	0	0.679185	1	1		0.105039		0.711325	0.0948499	0.0478346	0	FALSE
GMPPA	4		0.059662	0	0.246631	1	0.0053773	0.88641	1.34109	0.42	1		0.154529		1		0.131073		0.386959	0.30832	0.0953596	0	FALSE
GNAS	4		0.038136	0	0.0876511	1	0.0609776	0.170763	0.974965	0.96	1		0.319225		1		0.0888632		0.350584	0.266529	0.105412	0	FALSE
GOLGA1	4		0.00817934	0	0.353764	1	9.53853e-10	0.138409	1.74938	0.97	0.362651		0.632004		0.0644712	0.083524	0.440881	0.98	0.422207	0.223538	0.126832	0.741757	FALSE
GOLGA2	4		1.12193e-09	0	0.854898	1	0	0	1.54139	1	1		0.0466377		1		0.00326259		0.747953	0.11094	0.0685027	0	FALSE
GOLGA8B	3		1.51449e-13	0	0.668993	1	0.296964		0.503666		5.03245e-15	0	0.584164	1	1		0.0134779		0.579241	0.321343	0.0783832	0	FALSE
GOLIM4	4		7.81334e-13	0	0.871942	1	0.683114		0.537457		1		0.229923		6.50846e-06	0	0.849883	1	0.505866	0.197731	0.142736	0.198957	FALSE
FYN	4		0.201474	0	0.134587	1	0	0	3.01757	1	0	0	1.31471	1	1		0.260989		0.354064	0.196059	0.113058	0	FALSE
GPCPD1	4		8.00441e-08	0	0.339547	1	0	0	1.89375	1	4.67922e-12	0	0.562953	1	1		0.0613528		0.350102	0.177284	0.132118	0	FALSE
GRAMD2B	4		0.0359506	0	0.255672	1	4.10315e-06	0.0566409	3.03916	0.99	0.00428069	0	0.621539	1	1		0.348393		0.581327	0.133458	0.083153	0	FALSE
GRIPAP1	4		1.91087e-14	0	0.425202	1	5.74612e-13	0.138409	2.27004	0.97	0.0251786	0.332867	0.797752	0.88	1		0.0184609		0.557487	0.234006	0.0556055	0	FALSE
GRK6	3		0.00393798	0	0.252424	1	3.091e-09	0.0566409	1.89318	0.99	1		0.229175		1		0.0877674		0.51457	0.245811	0.0864991	0	FALSE
GUSBP11	4		3.44288e-07	0	0.540986	1	0	0	1.2432	1	0.0348505	0	0.797191	1	1		0.288243		0.256342	0.141363	0.122513	0	FALSE
GUSB	4		2.97037e-06	0	0.243052	1	4.8325e-10	0	2.70696	1	0.0160809	0.470944	0.652614	0.81	1		0.297113		0.438889	0.256153	0.104535	0	FALSE
H3-3A	3		1.02907e-12	0	1.40169	1	8.27721e-09	0	0.764062	1	1		0.000163001		1		0.00358672		0.55008	0.186655	0.0803225	0.741585	FALSE
H3-3B	4		0	0	0.233104	1	1		0.231459		0	0	1.88469	1	0.283016	0	0.310269	1	0.143821	0.10016	0.0779006	0.0823224	FALSE
HACE1	3		0.00369779	0	0.656099	1	1		0.547649		1		0.214104		0.157161	0.0469097	0.6612	0.99	0.484064	0.126227	0.0994998	0	FALSE
HAS1	2		0.0253123	0	0.258007	1	2.20757e-05	0	1.79931	1	1		0.764805		1		0.0894357		0.519077	0.193131	0.0925895	1.19034	FALSE
HAS2	2		0	0	1.14846	1	0	0	2.24349	1	0	0	0.855872	1	2.17278e-06	0.444977	0.340289	0.82	0.688036	0.201625	0.0456679	0	FALSE
HDGFL3	4		0	0	1.23034	1	1		1.05199		6.10737e-08	0	0.519053	1	0.0644712	0.592844	0.205531	0.74	0.338993	0.26324	0.0935757	0	FALSE
HECTD2-AS1	3		2.33997e-06	0	1.1166	1	1		0.114561		0.000216361	0	0.758638	1	0.710346		0.464103		0.292627	0.205664	0.14237	0.0839657	FALSE
HIF1A-AS3	4		0.0453682	0	0.290285	1	0	0	1.58256	1	1		0.129216		1		0.155478		0.557947	0.151397	0.0674848	0	FALSE
GPS2	4		0.00398964	0	0.0948315	1	3.81463e-13	0.138409	3.2708	0.97	1		0.36605		1		0.0595469		0.761505	0.140971	0.0286165	0	FALSE
FXYD6-FXYD2	2		0.000972623	0	0.693801	1	0.000479687	0.0566409	2.06333	0.99	1		1.08145		0	0	3.82567	1	0.440877	0.149738	0.132297	0	FALSE
FSTL1	3		0.00465269	0	0.275364	1	0.0334909	0	3.21957	1	0.802261		0.0917778		1		0.16642		0.659621	0.0671696	0.0525626	0	FALSE
FRA10AC1	4		0.172942	0	0.40037	1	1		1.74095		0.00139349	0.0471625	0.507154	0.99	1		0.0179483		0.55215	0.225766	0.0700986	0	FALSE
ERAP1	4		0.00146867	0	0.301644	1	0	0	0.619236	1	1		0.150855		0.083888	0	0.147768	1	0.242381	0.141554	0.117947	0	FALSE
ERCC5	4		0.00469122	0	0.545511	1	1		0.612877		0.493248		0.219779		5.98084e-05	0	1.00973	1	0.500006	0.22641	0.127093	0	FALSE
ERGIC1	4		0.225551	0	0.229006	1	0	0	3.41399	1	0.00497644	0.0471625	0.614876	0.99	1		0.0438626		0.686614	0.0935561	0.0531003	0	FALSE
ERP27	2		0	0	0.692377	1	3.60739e-15	0	2.06175	1	0	0	1.71392	1	1		0.100316		0.466024	0.417878	0.0600301	0	FALSE
ETFA	4		0.00635307	0	0.121371	1	1.2996e-09	0.37737	3.8744	0.88	7.53429e-14	0.0471625	0.646601	0.99	1		0.00323567		0.684157	0.185189	0.0455368	0	FALSE
ETS2	4		0.105897	0	0.192148	1	0	0	3.53513	1	0.0903379	0	0.617104	1	0.727126		0.135396		0.733219	0.11321	0.0344289	0.119027	TRUE
EXT1	4		0.000912552	0	1.07617	1	9.12434e-09	0.0993222	2.31036	0.98	1		0.0654597		1		0.142183		0.694637	0.099988	0.045544	0	FALSE
F8	3		3.6625e-14	0	2.07307	1	2.82159e-11	0	1.90767	1	0	0	1.5697	1	0	0	2.0531	1	0.48869	0.167025	0.0803929	0.0288287	FALSE
FABP3	3		9.69486e-15	0	3.37049	1	1.4008e-14	0	1.90116	1	0	0	3.24218	1	1		0.126584		0.46286	0.332574	0.11779	1.55345	FALSE
FAM107B	3		1.53849e-07	0	0.743262	1	0.26053		0.653321		0.00578573	0	0.595334	1	0.687008		0.668289		0.484777	0.217993	0.120732	1.29355	FALSE
FAM133B	4		0	0	1.16227	1	0.0109387	0.0566409	1.03222	0.99	0.823934		0.123884		0.31722	0.345049	0.133167	0.87	0.632953	0.258384	0.033352	0	FALSE
FAM160B2	4		0.00489925	0	0.834734	1	1		1.06071		0.673652		0.406567		1		0.187517		0.448956	0.167455	0.0912436	0.236578	FALSE
FAM177A1	4		0.00527898	0	0.276316	1	3.71696e-07	0.0566409	2.18953	0.99	0	0	0.579939	1	0.287228	0.779828	0.191969	0.63	0.624518	0.21978	0.0693108	0	FALSE
FAM200B	4		0.218827	0	0.724407	1	1		0.67756		1		0.0190872		1		0.085175		0.411217	0.154418	0.11757	0	FALSE
FAM228B	4		2.18269e-08	0	0.507145	1	2.06977e-12	0	1.13538	1	1.37647e-07	0	0.43733	1	1		0.077313		0.216732	0.192754	0.107997	0	FALSE
FAT1	2		0	0	1.2561	1	1.64203e-13	0	1.42669	1	0.00277896	0.117771	1.0275	0.97	0.925556		0.121473		0.549373	0.284594	0.0748166	1.77401	FALSE
FBLN2	3		0.0715646	0	0.169446	1	0	0	4.29735	1	0.00265552	0	0.508874	1	0	0	0.865848	1	0.524366	0.25291	0.0513645	0	TRUE
FBLN5	3		0	0	1.58741	1	0	0	3.95389	1	9.91354e-15	0	0.782744	1	0	0	1.54252	1	0.755054	0.104925	0.0557603	0	TRUE
FGD4	4		0.0252023	0	0.379051	1	0.270388		1.18656		1.95333e-14	0	1.02929	1	7.30059e-10	0	0.824994	1	0.432837	0.181391	0.115612	0	FALSE
FGF7	2		0.0638785	0	0.108852	1	1		1.7104		6.21033e-14	0	0.574547	1	0.0378672	0.627851	0.210619	0.72	0.697795	0.179702	0.0944622	0.020612	FALSE
FGFR1OP2	4		0	0	0.502854	1	0	0	2.28393	1	4.63179e-09	0	1.42743	1	1		0.146955		0.664248	0.264208	0.0445132	0	FALSE
FGGY	4		3.34699e-06	0	0.367055	1	0.0926018	0	2.20952	1	0	0	1.24881	1	0.0236607	0	0.663464	1	0.44692	0.20828	0.0614529	0	FALSE
FHL1	4		0.0246588	0	0.281473	1	0	0	2.84344	1	0	0	0.994296	1	1		0.161605		0.62617	0.234116	0.063136	0	FALSE
FKBP5	4		0.00237717	0	0.182963	1	0.00104232	0.0993222	2.71793	0.98	0	0.311415	0.590639	0.89	5.34078e-05	0.483363	0.312121	0.8	0.589991	0.119302	0.0511691	0	FALSE
FKBP8	4		0.20527	0	0.188993	1	0.00132506	0.283304	2.18767	0.92	0.118068	0.0471625	0.47746	0.99	1		0.131745		0.602781	0.13723	0.122356	0	FALSE
FLNA	4		0.0872644	0	0.102723	1	0	0	2.0286	1	1		0.0251979		1		0.00691503		0.450255	0.119605	0.0959067	1.88657	FALSE
FMC1-LUC7L2	4		0	0	1.04092	1	1		0.133492		3.17934e-09	0	0.765318	1	0	0	0.676978	1	0.58095	0.115769	0.0806113	0	FALSE
FMN1	2		1.33646e-06	0	0.903584	1	0	0	0.957569	1	1		0.171726		1		0.274642		0.40235	0.145698	0.111586	0.327806	FALSE
FOS	4		0.0180381	0	0.0958034	1	0	0	2.55721	1	0	0	0.968479	1	3.27896e-05	0	0.698632	1	0.123844	0.0799343	0.0657015	1.58554	FALSE
HIF1A	4		2.70898e-08	0	0.33817	1	0	0	1.68419	1	2.45514e-13	0	0.758525	1	1		0.0784512		0.342946	0.184281	0.138444	0	FALSE
HIP1	4		0.000315793	0	1.10811	1	1		0.250247		0.0349353	0.0853416	0.838295	0.98	0.103798	0.0469097	0.644659	0.99	0.50841	0.162126	0.0846333	0	FALSE
HMGN3	4		0.00955053	0	0.0751124	1	0	0	2.31834	1	2.43266e-14	0	0.919781	1	0.0578539	0	0.125678	1	0.623661	0.255254	0.0692254	0	FALSE
HNRNPH1	4		2.83946e-06	0	0.413636	1	3.13967e-05	0	1.63082	1	0	0	1.05574	1	0.0222733	0.280873	0.506465	0.9	0.430493	0.221357	0.115094	0	FALSE
KIAA0040	4		3.6625e-14	0	0.480344	1	0.020721	0.308812	1.34406	0.91	2.62688e-05	0	0.971523	1	1		0.101975		0.554573	0.180576	0.139165	0	FALSE
KIAA1191	4		0.119692	0	0.239638	1	2.49383e-08	0.0993222	1.76661	0.98	1		0.707655		0.0991664	0	1.0462	1	0.376256	0.232815	0.148049	0	FALSE
KIAA1211L	2		3.77798e-05	0	0.614045	1	3.43068e-10	0	1.25848	1	0.466349		0.423653		1		0.073393		0.353382	0.274716	0.169959	0	FALSE
KIAA1324L	4		7.83131e-05	0	1.01846	1	2.97559e-11	0	2.00124	1	1		0.307798		1		0.0630394		0.49445	0.137439	0.0735125	0	FALSE
KIF22	4		0	0	1.2983	1	1		1.94117		0	0	1.21034	1	1		0.0591233		0.690447	0.204868	0.0421676	0	FALSE
KIFAP3	4		0.140968	0	0.267551	1	1		1.41249		0	0	0.730326	1	6.17393e-13	0.0469097	0.925159	0.99	0.631819	0.148294	0.103296	0	FALSE
KLRC4-KLRK1	2		2.7946e-08	0	1.75932	1	0	0	1.73341	1	0.706688		0.12406		1		0.105585		0.5858	0.179046	0.0597037	0	FALSE
KLRG1	4		4.4898e-06	0	0.578863	1	0.0200215	0	0.833273	1	0	0	0.958605	1	3.81687e-08	0	0.841179	1	0.275062	0.229548	0.0872734	0	FALSE
KRTCAP2	4		0.208071	0	0.0560921	1	1		2.23452		1		0.0163482		1		0.0088747		0.870979	0.0613106	0.0277788	0	FALSE
KRTCAP3	3		0	0	1.54673	1	0	0	1.26216	1	1		1.06233		1		0.103107		0.397042	0.286442	0.169892	0	FALSE
KTN1	4		0	0	0.914577	1	1		1.88331		3.7388e-08	0	0.230501	1	1		0.0632585		0.420374	0.140323	0.0997883	0	FALSE
L3HYPDH	4		0	0	0.544419	1	1		0.169584		1		0.254448		1		0.129782		0.299824	0.150789	0.137179	0	FALSE
LAMP2	4		0.208462	0	0.191718	1	0	0	2.93925	1	0.0722417	0	0.640836	1	0.681894		0.155848		0.747345	0.183978	0.0318929	0	FALSE
LAT	2		0.00100489	0	0.376705	1	6.50834e-09	0	3.00531	1	0.529047		0.349114		0.754839		0.171028		0.572723	0.177681	0.0411824	0.463435	FALSE
LCN10	2		0	0	1.21784	1	0	0	1.66771	1	3.37141e-07	0	1.46806	1	0.595072		0.653607		0.404419	0.20882	0.199731	0	FALSE
LDHB	4		0.00585743	0	0.0708051	1	1		2.35806		1		0.01955		1		0.0161115		0.639501	0.0870602	0.0745176	0	FALSE
LGALS9	3		0.0240537	0	0.208669	1	4.60851e-06	0	1.98424	1	0	0	0.838302	1	0	0	0.607986	1	0.623689	0.149115	0.10578	0	FALSE
LHPP	3		0.0616863	0	0.464482	1	1.73104e-13	0	2.17667	1	1		0.125391		1		0.101834		0.525587	0.218172	0.10598	0	FALSE
LIMCH1	3		0	0	0.39393	1	0.0217538	0.659055	2.4302	0.73	0	0	2.22309	1	1		0.195521		0.460374	0.231386	0.0733263	0.215239	FALSE
LINC00893	3		6.24446e-09	0	1.05772	1	0.000441991	0	1.17575	1	0.00476187	0.35347	0.805977	0.87	0.908622		0.421714		0.294773	0.235716	0.145791	1.0402	FALSE
LINC00987	2		3.50286e-06	0	1.19904	1	0.893454		0.336967		0.0105813	0.0853416	1.03554	0.98	0.009355	0.0469097	0.480968	0.99	0.407738	0.183055	0.118293	0	FALSE
LINC01145	2		0.000381774	0	0.819272	1	0.425061		0.275648		2.46811e-06	0	0.590259	1	0.741835		0.688637		0.376972	0.211889	0.190824	0	FALSE
LINC01697	2		0.00367277	0	0.54202	1	0.0743546	0.0566409	0.374925	0.99	1		0.425489		1		0.224896		0.557662	0.320562	0.0664264	0	FALSE
LINC02580	2		0	0	1.39807	1	0	0	1.33838	1	1		0.0211907		1		1.48496e-16		0.886497	0.113503	5.08352e-33	0	FALSE
LIPE-AS1	3		0	0	1.80144	1	0	0	2.57172	1	1		0.0147547		1		0.0897161		0.443409	0.150507	0.123718	0	FALSE
LIPT1	4		1.74636e-13	0	1.49225	1	0	0.0566409	1.74095	0.99	1		0.369008		0.402162	0	0.340989	1	0.717119	0.118415	0.0661693	0	FALSE
LMNB1	2		8.73034e-09	0	1.35893	1	1		1.11324		1.34247e-06	0	0.791632	1	1		0.121149		0.663545	0.252127	0.0417758	1.11324	FALSE
LNX1	2		0.0383459	0	0.235681	1	0.0053299	0.202309	1.18084	0.95	0.00092438	0.822292	1.04753	0.61	0.975321		0.254836		0.402324	0.19742	0.128404	0	FALSE
LOC101927572	3		7.009e-06	0	0.752398	1	0.54019		0.315692		1		0.00561486		0.14128	0	0.218235	1	0.647809	0.14072	0.107796	0.298875	FALSE
KDM7A	4		4.34702e-06	0	0.705181	1	0.000175531	0.420731	2.68738	0.86	1		0.237381		1		0.124359		0.602996	0.108953	0.078209	0	FALSE
LOC101929309	4		0.0584311	0	0.195852	1	1.66368e-11	0	1.23117	1	1		0.0471752		1		0.0312117		0.336946	0.112261	0.0824028	0.43368	FALSE
KCNAB1	2		1.24875e-07	0	1.00111	1	0.000277626	0.0566409	1.18761	0.99	0.00224095	0.14656	0.513997	0.96	1		0.228829		0.503849	0.146941	0.0952431	1.80229	FALSE
IVNS1ABP	4		0.123494	0	0.125082	1	1		0.0142337		3.60489e-09	0.0853416	1.43607	0.98	1		0.149988		0.649283	0.211734	0.049625	0	FALSE
HNRNPH3	4		0.00228036	0	0.215065	1	0.763705		0.167845		1		0.000679822		0.177722	0	0.210397	1	0.432059	0.314733	0.241496	0	FALSE
HOOK2	3		0.0102525	0	0.495388	1	0.0293894	0	0.785721	1	0	0	1.6404	1	1		0.144829		0.408601	0.254966	0.0989791	0	FALSE
HOPX	3		0	0	0.988664	1	0	0	2.65009	1	1		0.0582079		0	0	0.831337	1	0.707181	0.128033	0.0635726	0	FALSE
HOTAIRM1	4		0	0	1.55138	1	0	0	1.55338	1	1		0.0203594		1		0.0146514		0.890058	0.0462644	0.0311697	0	FALSE
HOXA10-HOXA9	2		0.00378424	0	0.656677	1	0.151588		0.819372		0.224941	0.0853416	0.315639	0.98	0.74391		0.380119		0.564477	0.241831	0.193692	0.826535	FALSE
HOXA10	2		0.000266724	0	1.53022	1	9.8484e-05	0	1.32521	1	1		5.83618e-16		1		1.18985e-16		1	2.78476e-32	7.38967e-35	0	FALSE
HOXB-AS1	3		2.11917e-06	0	1.03903	1	3.60739e-15	0	1.16465	1	1		0.0637667		1		0.0400045		0.528266	0.206367	0.144718	0	FALSE
HP1BP3	4		0	0	0.89641	1	0	0	1.92946	1	0.0925531	0.433895	0.586738	0.17	1		0.650076		0.47733	0.169681	0.140629	0	FALSE
HSF2	4		0.000146658	0	0.678409	1	4.34951e-07	0.138409	2.52551	0.97	1		0.872052		0.00670594	0.386	0.465598	0.85	0.520807	0.329765	0.0919697	0	FALSE
HSP90B1	4		0.148158	0	0.123966	1	0	0	3.40374	1	5.03245e-15	0	0.538196	1	1		0.0231953		0.657831	0.120234	0.0345716	0	FALSE
HSPA12A	3		1.92581e-05	0	0.836664	1	0.770939		0.310012		1		0.163933		3.07632e-06	0	1.36995	1	0.355167	0.14506	0.117093	0.265158	FALSE
HSPB1	4		0.153444	0	0.100496	1	1		0.074062		1		0.639321		1		0.920582		0.477932	0.0512633	0.0470044	0	FALSE
HSPH1	4		2.56866e-09	0	0.231691	1	0	0	2.81999	1	0	0	2.61424	1	0.140649	0	0.14759	1	0.470818	0.271898	0.06402	0	FALSE
HYAL2	4		0	0	0.79294	1	0	0	3.08816	1	0	0	2.25492	1	0.214183	0	0.597461	1	0.630465	0.105846	0.072138	4.0944	FALSE
IARS2	4		0.14297	0	0.617985	1	0.00027588	0.283304	1.64747	0.92	1		0.169631		1		0.157127		0.720131	0.114069	0.0502134	0.157799	FALSE
ICAM3	4		3.52045e-06	0	0.193793	1	0	0	2.41331	1	1		0.271826		0	0	0.551169	1	0.711098	0.113603	0.0489252	0	FALSE
IDI1	4		0.000725913	0	0.303042	1	0	0	2.71643	1	0	0	0.911641	1	1		0.200654		0.781038	0.11297	0.0455008	0	FALSE
IFI16	4		0.025354	0	0.115117	1	0	0	1.62255	1	0.0153488	0	0.768662	1	0	0	0.773583	1	0.447235	0.240952	0.112086	0.266294	FALSE
IK	4		9.14197e-08	0	0.401932	1	0	0	2.25255	1	0	0	0.452416	1	1		0.136572		0.734091	0.131836	0.0679232	0	FALSE
IL1R1	4		0.0715175	0	0.245727	1	0.00814257	0.0993222	1.37207	0.98	0	0	0.863633	1	2.67003e-05	0.114816	0.473623	0.97	0.397216	0.174626	0.152118	0.138024	FALSE
IL1RN	2		0	0	0.691428	1	0	0	3.29667	1	0	0	1.21515	1	1		0.167569		0.596598	0.242079	0.0698091	0	FALSE
IL32	4		1.05826e-05	0	0.315397	1	0.0010682	0.283304	2.20996	0.92	0.000222992	0.0471625	0.359319	0.99	0	0	2.6247	1	0.388864	0.19115	0.135652	0	FALSE
IL7R	3		0	0	0.559517	1	0	0	2.54021	1	0	0	2.08767	1	0.0268101	0	0.357234	1	0.618441	0.234814	0.0518353	1.17796	FALSE
ING1	4		0	0	1.03167	1	0	0	1.24464	1	1		0.0722137		0.384253	0	0.149272	1	0.409092	0.239968	0.195522	0	FALSE
INO80E	4		0.00759229	0	0.576353	1	0.00494182	0.230835	1.22024	0.94	0.871855		0.97002		0.969998		0.243128		0.507369	0.206349	0.082247	0	FALSE
INTS6L	3		5.05458e-05	0	0.750541	1	1		0.271917		1		0.0692938		1		0.0648203		0.550719	0.141299	0.0917896	0.00325164	FALSE
IRF1	4		0.148275	0	0.290923	1	0.00150401	0	1.58007	1	1		0.678381		1		0.0293123		0.427329	0.174554	0.135919	0	FALSE
ITGA1	4		0	0	1.42532	1	0.425571		0.863362		0	0	1.08248	1	1		0.194217		0.368069	0.311528	0.128887	0	FALSE
ITGB4	2		9.06506e-11	0	0.478107	1	1.40224e-12	0	0.931066	1	1		1.18823		1		0.0716078		0.443825	0.287136	0.0745285	0.930344	FALSE
KATNBL1	4		0.108044	0	0.172529	1	0.000203866	0.481448	2.19594	0.83	7.21192e-10	0	0.356015	1	1		0.182415		0.674828	0.151338	0.056517	0	FALSE
PLEKHA1	4		0.000779278	0	0.336633	1	5.08943e-05	0.138409	1.23725	0.97	0	0	2.50362	1	0.0555592	0.214202	1.27819	0.93	0.401316	0.330946	0.169251	0	FALSE
PLEKHO2	2		0.0327789	0	0.688113	1	1		0.276889		1.34037e-09	0	1.09855	1	0.176149	0.083524	0.461514	0.98	0.270528	0.225809	0.2179	0	FALSE
PLTP	3		0	0	0.346067	1	0	0	3.82488	1	5.89287e-05	0	0.493803	1	0	0	0.602464	1	0.846609	0.0559751	0.0278611	0	TRUE
TMEM164	2		0.0750798	0	0.183569	1	0.277191		1.60543		1		0.0700131		0.404052	0	0.383657	1	0.328694	0.220548	0.14758	0	FALSE
TMEM175	4		4.74982e-07	0	0.259001	1	6.35515e-12	0.0566409	2.03282	0.99	5.49319e-07	0	1.56769	1	1		0.562496		0.472711	0.295564	0.106864	0	FALSE
TMEM176B	4		0.0626319	0	0.493772	1	6.53387e-14	0	1.9365	1	0.695509		0.166232		0.14128	0	0.364292	1	0.513716	0.220808	0.109266	0	FALSE
TMEM219	4		0.00064581	0	0.152119	1	0.811799		1.92419		0.0738851	0.981906	0.51397	0.49	5.57262e-06	0	0.213707	1	0.613775	0.267318	0.0788273	0	FALSE
TMEM237	4		0.124876	0	0.261861	1	1.11196e-08	0	3.08947	1	2.08709e-06	0.0471625	0.666602	0.99	0.121469	0.0469097	0.242493	0.99	0.650471	0.199367	0.0706278	0	FALSE
TMEM39A	4		0.206283	0	0.44916	1	1.91087e-14	0	2.98428	1	0.846726		0.126172		1		0.271323		0.672533	0.115684	0.0569111	0	FALSE
TMEM41A	4		0.000808796	0	0.482764	1	0	0	1.97396	1	0.0741612	0.0471625	0.239376	0.99	9.80703e-14	0.0469097	0.752092	0.99	0.708772	0.126555	0.108086	0	FALSE
TMOD1	4		1.507e-09	0	1.0376	1	0	0	3.80755	1	0.986182		0.522163		0.000362667	0	0.653504	1	0.734916	0.170198	0.0414839	0.618433	TRUE
TNFAIP2	4		0.000196981	0	1.5857	1	1		0.323114		0.612453		0.821552		0.0352778	0.574405	0.530281	0.75	0.32588	0.25605	0.12662	0	FALSE
TNFRSF1A	4		2.02381e-09	0	0.486021	1	0	0	2.98312	1	1		0.179776		1		0.0869017		0.7277	0.132044	0.0423857	0	FALSE
TNRC6B	4		5.75607e-07	0	0.250522	1	0	0	1.28094	1	6.43248e-05	0	0.544159	1	1		0.202857		0.390314	0.178858	0.139534	0	FALSE
TOB1	3		8.2236e-05	0	1.11115	1	4.6563e-13	0	1.28077	1	1		0.0244719		1		0.121409		0.427858	0.206971	0.162522	1.89653	FALSE
TOM1L1	3		0.259173	0	1.10307	1	3.04285e-09	0	1.99463	1	0.981028		0.840254		1.44455e-05	0	1.7737	1	0.532973	0.12229	0.114427	0	FALSE
TMEM161B-AS1	4		0.0396961	0	0.57063	1	1.82871e-15	0	1.34342	1	0	0	2.03091	1	1		0.248019		0.274431	0.182055	0.133915	0	FALSE
TOMM70	3		0.253373	0	0.370732	1	3.78326e-06	0.94341	1.36043	0.54	1		0.110149		1		0.253192		0.453955	0.18083	0.1325	0.170447	FALSE
TPGS2	4		8.35884e-05	0	0.205622	1	1		2.95858		0	0.0471625	1.15614	0.99	1		0.0582056		0.65424	0.175338	0.0505166	0	FALSE
TPM1	4		2.13865e-11	0	0.339008	1	0	0	2.16244	1	0	0	1.71203	1	0	0	0.581332	1	0.493575	0.247386	0.124333	0	FALSE
TPM2	4		1.04157e-08	0	1.14752	1	0	0	3.20677	1	6.21033e-14	0	3.53059	1	1		0.229855		0.688644	0.194887	0.0587478	0	FALSE
TPRG1	3		3.25656e-05	0	0.386777	1	8.63502e-14	0	1.79406	1	3.62836e-08	0	0.961189	1	3.35359e-08	0	0.642301	1	0.276223	0.170654	0.0996292	1.25748	FALSE
TPR	4		0.00199427	0	0.210487	1	1		0.744028		0.671036		0.179979		1		0.11924		0.516983	0.148447	0.128826	0	FALSE
TPT1	4		0.0427119	0	0.0790872	1	1		3.53486		1		0.0155011		1		0.000276908		0.883645	0.0498697	0.014736	0	FALSE
TRAFD1	4		0.0140037	0	0.217126	1	1		3.02932		0	0	0.911092	1	0.564112		0.203082		0.711887	0.11298	0.0540576	0	FALSE
TRIM33	4		5.67155e-06	0	0.44103	1	0.000116527	0	1.31757	1	0.871424		0.58728		0.361912	0.422576	0.478201	0.83	0.385987	0.288276	0.126037	0	FALSE
TRIP10	4		1.66498e-06	0	0.810066	1	1.4074e-06	0	1.57102	1	1		0.0268426		0.00345846	0.141281	0.816416	0.96	0.603199	0.201928	0.075101	0	FALSE
TRIP6	4		0.000193657	0	0.497254	1	0.192385		1.09955		0.732849		0.869217		1		0.0942901		0.640426	0.112596	0.0562588	0	FALSE
TRPC4AP	4		0.239967	0	0.130509	1	0.00236349	0.170763	2.5418	0.96	0.0485503	0	0.238116	1	1		0.0230979		0.624421	0.0918348	0.0701222	0	FALSE
TRPM4	4		1.54434e-10	0	0.91253	1	4.86672e-08	0.0993222	0.924275	0.98	0.318393		0.760928		0	0	0.884325	1	0.464077	0.137479	0.101924	0	FALSE
TRPT1	4		0.000718119	0	0.226879	1	4.47663e-05	0	1.90156	1	0.482165		0.52305		1		0.234397		0.43847	0.31531	0.065319	0	FALSE
TOPORS	4		0.00251601	0	0.923145	1	0.00643292	0.514929	1.33227	0.81	1		0.274999		7.24246e-08	0	0.587204	1	0.437723	0.286728	0.24491	0	FALSE
TMEM116	3		0.256811	0	0.341991	1	3.79076e-07	0	2.0565	1	0.154639	0.269412	0.608578	0.91	0.537028		0.612172		0.323014	0.144601	0.131287	0	FALSE
TKT	4		0	0	0.437186	1	0	0	3.45297	1	3.20403e-10	0	0.293973	1	7.63814e-07	0.364783	0.149223	0.86	0.722225	0.0782673	0.0347111	0	FALSE
TKFC	4		9.3858e-10	0	0.959816	1	1		0.134427		4.98054e-12	0	0.839407	1	4.395e-14	0	0.759447	1	0.526933	0.146241	0.132472	0	FALSE
SRRT	4		4.06735e-07	0	0.717214	1	0.289202		1.56173		0.788863		0.687058		1		0.0265673		0.39821	0.188279	0.128796	0.325314	FALSE
SRSF10	4		0.163581	0	0.102795	1	8.59234e-06	0	1.03877	1	1		0.60533		1		0.482784		0.363562	0.217434	0.177549	0	FALSE
SRSF11	4		3.25275e-05	0	0.194424	1	0	0	2.14657	1	1		0.428422		1		0.321799		0.373374	0.199272	0.105085	0	FALSE
SRSF2	4		9.69486e-15	0	0.414304	1	0	0	1.65316	1	0.104017	0.290486	0.544201	0.9	1		0.0745989		0.830126	0.0967732	0.0311126	0	FALSE
SRSF3	4		0	0	0.282772	1	0	0	2.14494	1	0	0	1.1418	1	1		0.0693398		0.755014	0.191337	0.0291825	0	FALSE
SRSF5	4		0	0	0.293066	1	0	0	2.83067	1	8.35831e-07	0	0.779626	1	1		0.233776		0.673479	0.165878	0.078445	0	FALSE
SS18	4		0.00403734	0	0.200993	1	0	0	2.38516	1	1		0.509096		1		0.0754458		0.560812	0.27598	0.0496169	0	FALSE
SSB	4		0.000219651	0	0.115069	1	5.6864e-12	0	2.64652	1	0	0	0.715378	1	0.231177	0	0.123494	1	0.552078	0.191525	0.0763532	0	FALSE
SSH2	4		5.742e-06	0	0.333646	1	0	0.0566409	1.68352	0.99	0.0413388	0	0.67144	1	1.13664e-14	0	0.599944	1	0.393085	0.179341	0.0818014	0	FALSE
ST3GAL1	4		0.157717	0	0.20717	1	0.874586		2.00148		1.01314e-11	0	0.52157	1	1		0.0548983		0.645397	0.120339	0.0600622	0	FALSE
ST6GALNAC6	4		3.27094e-08	0	0.400224	1	0	0	2.25148	1	0	0	1.35658	1	0.0042614	0	0.559599	1	0.301575	0.290322	0.15366	1.11022e-16	FALSE
ST7-AS2	4		0.00393798	0	0.525698	1	2.44664e-08	0	1.06663	1	0.193435	0.491007	0.66873	0.8	1		0.109338		0.622455	0.169394	0.0919254	0	FALSE
STEAP4	2		9.87756e-05	0	0.508573	1	0	0	2.40189	1	1		0.362909		1		0.145496		0.827223	0.0963218	0.0356949	3.65448	FALSE
STK17A	4		0.0596101	0	0.989726	1	2.22827e-10	0	2.06363	1	1		0.759983		4.58467e-10	0.083524	0.83226	0.98	0.610853	0.177808	0.0651502	0	FALSE
STK3	4		0.0623551	0	0.23968	1	1.40356e-10	0.25857	2.49455	0.93	1		0.189076		1		0.139349		0.594205	0.103778	0.0960052	0	FALSE
STXBP2	2		3.77914e-13	0	0.43616	1	0	0	3.02022	1	0.0420888	0	0.314809	1	1		0.287769		0.685989	0.0870477	0.0591885	0	FALSE
SULT1B1	2		2.82536e-14	0	1.30823	1	0	0	1.98039	1	0.891256		0.833958		1		0.113866		0.729493	0.229877	0.0406297	1.45595	FALSE
SUZ12P1	4		0.0514205	0	0.332818	1	4.00958e-07	0	0.645618	1	1		0.00708335		1		0.0555307		0.398212	0.214445	0.0829162	0	FALSE
SYT17	2		2.64497e-06	0	1.49355	1	1.32797e-06	0	1.12723	1	0.506521		0.568773		0.483264		0.223167		0.439681	0.2778	0.11422	0	FALSE
TACC1	4		0.0102866	0	0.211657	1	1.45411e-13	0	1.40595	1	1		0.214343		1		0.186457		0.347689	0.140026	0.127851	0	FALSE
TAGLN	4		9.69486e-15	0	3.35453	1	0	0	2.76791	1	2.32156e-06	0	2.00751	1	6.4003e-08	0	0.227042	1	0.501153	0.0914788	0.0660222	0	FALSE
TBC1D31	2		0.000266843	0	0.870183	1	0.00113316	0	1.10184	1	0.3228		0.438663		1		0.27377		0.35381	0.168833	0.116119	0	FALSE
TBC1D4	4		5.77909e-08	0	0.662103	1	1.28091e-06	0.0566409	1.64285	0.99	1		0.212826		0.000255693	0.0469097	0.712016	0.99	0.561223	0.122416	0.0848606	0	FALSE
TBX3	3		6.86891e-07	0	0.748549	1	0.000384062	0.230835	1.17809	0.94	0.488875		0.403577		1.15544e-05	0	0.517788	1	0.592872	0.211933	0.0598376	0	FALSE
TFPI	4		0.0112953	0	0.353375	1	6.66455e-08	0	0.987125	1	0.000232758	0	0.950881	1	1		0.141202		0.423611	0.173324	0.095942	0.257612	FALSE
TGFBI	3		0.112782	0	0.231538	1	0	0	3.74245	1	0	0	1.52766	1	1		0.278227		0.713412	0.101318	0.0638317	0.643763	TRUE
THAP2	4		2.58206e-12	0	1.25707	1	1.99064e-11	0.138409	0.924372	0.97	2.1725e-08	0	0.640083	1	1		5.28641e-17		0.699492	0.300508	4.92606e-33	0	FALSE
THBS3	3		0.00683418	0	0.492677	1	1.00647e-12	0	1.47429	1	0.266096	0.0471625	0.463784	0.99	1		0.0875745		0.449882	0.141204	0.1265	1.24949	FALSE
TIMP1	4		0.000666698	0	0.0995604	1	1		2.46363		1		0.181009		1		0.0546642		0.730338	0.151721	0.0373742	0	FALSE
TSHZ2	3		0.000725913	0	0.458703	1	0	0	0.978804	1	1		0.08345		1		0.0463476		0.299531	0.185249	0.171085	1.09322	FALSE
TSPAN1	4		6.56954e-05	0	1.18153	1	0	0	2.13239	1	1		0.415527		3.32395e-14	0	1.16798	1	0.31598	0.21614	0.165404	0	FALSE
TTN-AS1	4		0	0	0.705101	1	1.23304e-12	0	0.936062	1	0.00276786	0	0.459543	1	0.0149377	0	0.345041	1	0.340746	0.135435	0.117751	0.00323554	FALSE
TYMP	4		0	0	0.386647	1	0	0	2.50775	1	0	0	0.717772	1	1		0.355459		0.572524	0.124928	0.0853479	0	FALSE
ZFPL1	4		0.040615	0	0.297563	1	0	0	1.97397	1	1		0.122861		1		0.00953506		0.496364	0.186206	0.123541	0	FALSE
ZMYM2	4		0.00335559	0	0.430725	1	1		0.432827		1		0.0752573		1		0.00567923		0.248061	0.207794	0.10831	0	FALSE
ZMYM5	4		2.37006e-05	0	0.619168	1	0.0073929	0.138409	1.13133	0.97	0.43892		0.457318		1		0.631415		0.341824	0.233727	0.133238	0.668387	FALSE
ZNF106	4		0.000718119	0	0.307619	1	1		1.18412		0.000872053	0	0.172095	1	0	0	0.407444	1	0.407737	0.207915	0.140353	0	FALSE
ZNF18	3		1.08477e-05	0	1.03341	1	0.000278322	0.420731	1.19118	0.86	0.000158704	0.0471625	0.743425	0.99	2.46549e-13	0	1.60214	1	0.452859	0.180207	0.152254	0.331325	FALSE
ZNF197	2		0.000371919	0	0.78312	1	0.164436		0.284419		1		0.44238		0.532158		0.706502		0.358395	0.25695	0.186675	0	FALSE
ZNF19	2		0.0919337	0	0.567208	1	0.329293		0.753019		2.06469e-06	0.0471625	0.850903	0.99	1		0.186745		0.441401	0.231864	0.155382	0	FALSE
ZNF207	4		0	0	0.367137	1	1		0.0495186		1		1.49027		1		0.218278		0.5477	0.33618	0.0345859	0	FALSE
ZNF326	4		0.00464385	0	0.432232	1	5.73261e-14	0	1.99187	1	0.277723	0.200259	0.758694	0.94	4.74423e-06	0	0.476002	1	0.394435	0.22124	0.132934	0	FALSE
ZNF431	4		0	0	1.2157	1	1		0.894783		1		0.474891		0.0378672	0.751152	0.714182	0.65	0.425191	0.15303	0.144934	0	FALSE
ZNF487	3		9.02842e-06	0	1.21322	1	0.272462		0.884556		0.000934489	0.117771	0.803681	0.97	0.0974304	0.083524	0.34858	0.98	0.361839	0.249791	0.158369	0.697609	FALSE
ZNF548	2		7.75096e-12	0	0.874732	1	0	0	1.09407	1	0.154008	0	0.36945	1	1		0.140087		0.613096	0.213086	0.0667752	0	FALSE
ZNF721	4		0.000255669	0	0.392431	1	0.13503	0.138409	0.239887	0.97	0.0115777	0.117771	0.695724	0.97	1		0.0612283		0.412365	0.257349	0.104088	0	FALSE
ZNRF3	3		2.93995e-09	0	0.74341	1	3.84557e-06	0.0993222	1.30064	0.98	0	0	0.684473	1	1		0.0509863		0.36957	0.143405	0.11401	0.021811	FALSE
ZRANB2-AS1	4		0	0	1.63838	1	0	0	1.64423	1	1		0.23821		1		3.16288e-16		0.942338	0.0576617	2.13147e-32	0.754232	FALSE
ZYX	4		0.00129733	0	0.158893	1	0.965168		1.35117		0.376634		0.54381		2.69078e-07	0	0.434421	1	0.378468	0.365512	0.0869563	0	FALSE
unknown_chr10_26700000	3		0	0	1.25236	1	0	0	1.25631	1	0.0530615	0.117771	0.356679	0.97	1		0.120281		0.636593	0.168805	0.121322	0	FALSE
unknown_chr10_78000000	4		0	0	1.13924	1	0.010002	0	0.956502	1	0	0	0.562425	1	0.00235412	0.40366	0.259847	0.84	0.661807	0.189801	0.0708104	0	FALSE
unknown_chr11_6600000	2		5.57106e-07	0	1.65978	1	2.66087e-10	0	1.57497	1	1		0.189039		1		0.0554742		0.552366	0.342823	0.0666776	0	FALSE
unknown_chr12_56500000	3		4.58627e-07	0	0.848712	1	0.192806		0.70781		1		0.289426		0.00672205	0.259254	0.55846	0.91	0.34525	0.255656	0.176958	0	FALSE
unknown_chr12_79700000	2		0	0	1.08733	1	0	0	0.887798	1	1		3.36432e-16		1		5.61713e-17		1	5.27603e-32	2.66049e-63	0	FALSE
unknown_chr21_8800000	4		2.23443e-08	0	0.57966	1	1		1.45642		0	0	1.26818	1	0.416362	0	0.115762	1	0.587943	0.220852	0.0799242	0	FALSE
unknown_chr4_139000000	3		0.0224184	0	0.842085	1	1		0.139988		1		0.0453888		0.101637	0	0.40873	1	0.234556	0.176776	0.125917	0	FALSE
unknown_chr4_48800000	2		3.79507e-07	0	1.04134	1	0.01612	0	0.760316	1	1		0.374222		1		0.196774		0.662013	0.179989	0.0957395	0	FALSE
unknown_chr5_88800000	4		1.69158e-11	0	1.04672	1	3.26451e-12	0.440598	1.05646	0.85	6.04799e-07	0	0.398135	1	1.22751e-05	0.114816	0.330989	0.97	0.534372	0.298632	0.164574	0	FALSE
unknown_chr6_83900000	2		6.09807e-13	0	0.985765	1	0.814617		0.335402		1.83248e-11	0	0.620977	1	1		0.495629		0.459806	0.199473	0.177406	0	FALSE
unknown_chr6_GL000251v2_alt_3000000	4		0	0	1.09852	1	0	0.0993222	0.982548	0.98	1		1.32024e-16		1		6.02818e-18		1	4.34169e-32	1.5174e-63	0	FALSE
unknown_chr6_GL000251v2_alt_4400000	4		0.000199549	0	0.575773	1	3.12944e-11	0	2.3575	1	0.0315058	0	0.613233	1	5.96673e-05	0	0.171898	1	0.565561	0.0887357	0.0665512	0	FALSE
unknown_chr7_105000000	4		0.0903469	0	0.571768	1	1		0.147524		1		0.0709995		1		0.0652808		0.433626	0.178992	0.138696	0	FALSE
ZFAS1	4		3.13972e-06	0	0.231384	1	0	0.0566409	1.00288	0.99	0.456736		1.25666		1		0.0920552		0.523428	0.372894	0.0464837	0	FALSE
SRRM1	4		0.00133869	0	0.258145	1	0.386113		0.507622		1		0.224586		1		0.646987		0.318109	0.165365	0.123074	0	FALSE
ZFAND6	4		0.0701318	0	0.140273	1	0	0	2.90905	1	1		0.545915		1		0.0153188		0.602006	0.196079	0.0620091	0	FALSE
ZCCHC10	4		0.0011366	0	0.310861	1	0	0	1.5607	1	1		0.0707913		8.70011e-12	0	1.05375	1	0.485787	0.221811	0.189836	0	FALSE
UAP1	4		8.10767e-09	0	0.371538	1	3.44122e-11	0	2.69107	1	0	0	2.85683	1	0.0648006	0	0.182195	1	0.475599	0.370011	0.0479891	0	FALSE
UBA52	4		0.00426245	0	0.0418983	1	0.0459973	0.588882	2.09418	0.77	0	0	1.33095	1	1		0.338298		0.471742	0.253851	0.0894175	0.224261	FALSE
UBE4A	4		0.201474	0	0.185239	1	0.102168	0.588882	1.97173	0.77	1		0.263652		1		0.277354		0.489545	0.174257	0.115943	0	FALSE
UBR3	4		2.58392e-08	0	1.4413	1	1		0.127892		0.0199678	0	0.933428	1	1		0.123293		0.375754	0.209746	0.0771677	0	FALSE
UBXN11	3		0.000136892	0	0.199776	1	0	0	2.52937	1	1		0.531145		1.13664e-14	0	0.830989	1	0.426907	0.189066	0.0894699	0	FALSE
UFSP2	4		0	0	0.65516	1	0	0.283304	1.22493	0.92	0	0	1.04081	1	1		0.0434563		0.535463	0.157126	0.112141	0	FALSE
UGDH-AS1	4		2.88526e-06	0	0.794227	1	0.152116		0.740498		0.0113204	0.290486	0.293578	0.9	1.35402e-05	0	0.591133	1	0.30958	0.135158	0.107598	0	FALSE
UPP1	4		9.69486e-15	0	0.462893	1	0	0	1.52393	1	6.82928e-05	0.117771	0.706764	0.97	0.0630897	0	0.314945	1	0.369568	0.245187	0.116456	0	FALSE
UQCRB	4		0.252898	0	0.0489289	1	1		2.11705		1		0.018238		1		0.0118143		0.907656	0.0753975	0.00609776	0	FALSE
USF1	4		0.27496	0	0.32687	1	1		2.02315		0.000363302	0.174218	0.917885	0.95	1		0.108562		0.686395	0.189963	0.0493732	0	FALSE
USP10	4		0	0	0.491558	1	0	0	3.15964	1	1		0.547535		1		0.0816146		0.638986	0.140764	0.0941075	0	FALSE
USP34	4		0	0	0.866716	1	1		0.795053		1		0.209005		1		0.180594		0.241903	0.176889	0.0849457	0	FALSE
UTRN	4		0.0926577	0	0.19873	1	9.39271e-09	0.0566409	1.1443	0.99	1		0.171616		1		0.155222		0.319949	0.170216	0.0797048	0	FALSE
VAMP2	4		0.26746	0	0.0724729	1	1		2.60487		1		0.00251351		1		0.0316759		0.931669	0.0389524	0.0133748	0	FALSE
VCAN	3		0	0	0.389918	1	0	0	1.53692	1	0.0722417	0	0.397204	1	0.000692267	0	0.577148	1	0.377497	0.237544	0.111537	0	FALSE
VCP	4		0.0100837	0	0.183711	1	4.29358e-07	0.983416	2.40192	0.49	0.0422633	0.635551	0.260192	0.72	1		0.0553264		0.700323	0.105392	0.0395111	0	FALSE
VEPH1	2		0.00275872	0	1.13033	1	2.23539e-10	0	1.26544	1	0.903079		0.248035		1		0.0786912		0.346127	0.175111	0.100241	0	FALSE
VIM	4		0.199674	0	0.0683137	1	0.0134518	0	3.64071	1	1		0.214949		1		0.0949705		0.567348	0.0298383	0.0262139	0	TRUE
VPS29	4		0	0	0.413446	1	0	0	2.60565	1	1.26723e-05	0	0.985031	1	1		0.00577453		0.591949	0.218365	0.0692991	0	FALSE
WARS1	4		8.12775e-14	0	0.320103	1	0	0	3.10003	1	0	0	2.75322	1	1		0.35604		0.417207	0.307293	0.102819	0	FALSE
WDR19	4		2.0061e-08	0	0.724665	1	0.000142319	0.37737	1.25284	0.88	1		0.192987		1		0.162399		0.392979	0.236776	0.079255	0.732707	FALSE
WDR5	3		0.144027	0	0.183814	1	0.768568		2.81197		4.80224e-07	0.0853416	0.466782	0.98	1		0.157669		0.764922	0.0735384	0.0451227	0	FALSE
WFDC21P	2		2.79603e-07	0	0.974022	1	0.00232448	0.170763	0.74655	0.96	0.830917		0.433278		9.98315e-06	0	0.816317	1	0.577856	0.18367	0.144143	0	FALSE
WIPF1	3		0.0035519	0	0.255543	1	6.30379e-07	0	0.551755	1	1		0.0500231		1		0.307183		0.263506	0.150743	0.131069	0	FALSE
XRCC6	4		0.000247992	0	0.0994333	1	0.962991		4.04198		1		0.00537262		1		0.0338229		0.785223	0.0665326	0.0428766	0	FALSE
YBX3	4		0	0	0.155332	1	0	0	1.20384	1	0	0	1.98708	1	0.00528218	0.280873	0.204356	0.9	0.402956	0.355401	0.0565244	0.489175	FALSE
YTHDF3	4		2.72861e-10	0	0.583629	1	7.00975e-14	0.672868	2.14591	0.72	3.21719e-05	0.415053	0.476097	0.84	0.000177102	0	0.257271	1	0.822111	0.0627936	0.0397161	0	FALSE
ZBTB20	4		0.000153159	0	0.293478	1	3.58811e-06	0	0.812183	1	1		0.087418		1		0.394534		0.170132	0.104726	0.101143	0	FALSE
ZC3HAV1	4		0.0142651	0	0.242232	1	0.162745		1.83071		0.000332937	0	0.480069	1	1		0.156633		0.53754	0.170095	0.0714576	0	FALSE
ZEB2	3		0.0632368	0	0.342807	1	0.150297		0.743892		1		0.212262		0.0171324	0	0.363624	1	0.452599	0.184642	0.111205	0.357074	FALSE
SRRD	3		7.77279e-09	0	1.06008	1	8.46257e-08	0.37737	1.85437	0.88	9.39694e-11	0	0.807776	1	1		0.0561017		0.651388	0.183908	0.102058	0	FALSE
SRP72	4		0.182533	0	0.128302	1	1		3.54906		0.174006	0.722774	0.401958	0.67	1		0.0163819		0.818857	0.0649389	0.0481229	0	FALSE
SRP19	4		0	0	0.573341	1	1.79404e-05	0	0.398279	1	1		0.148559		1		0.0531497		0.422538	0.288139	0.145625	0	FALSE
RBM4	4		1.18228e-08	0	0.420987	1	0	0.0566409	1.80587	0.99	1		0.867313		1		0.113746		0.607863	0.231749	0.0423291	0	FALSE
RECK	4		0.000576006	0	0.324915	1	0.945035		1.84503		2.06469e-06	0	0.668445	1	1		0.699825		0.448798	0.182787	0.0937406	0.0499776	FALSE
RFTN1	4		5.05458e-05	0	0.702801	1	1		0.562934		7.55164e-06	0.14656	0.804562	0.96	1		0.111923		0.335791	0.265425	0.0900609	0	FALSE
RGS5	4		0.00417828	0	1.71384	1	0	0	2.72412	1	0	0	1.81222	1	1		0.45238		0.330709	0.234503	0.184275	2.47288	FALSE
RIN2	3		0.0273022	0	0.855473	1	0.0184867	0	1.05332	1	1		0.198089		1		0.161146		0.382914	0.118803	0.0975851	0	FALSE
RIPK3	3		0.00364737	0	0.455746	1	2.17023e-09	0	1.7718	1	2.97138e-08	0	0.636148	1	1		0.039684		0.445208	0.227693	0.118123	1.12459	FALSE
RLF	4		0.0653448	0	0.174919	1	0	0	2.84005	1	1		0.0376175		1		0.233647		0.703515	0.106023	0.0734041	0.189705	FALSE
RMDN2	4		5.83036e-09	0	0.618119	1	1		1.18093		6.3226e-05	0.0853416	0.768836	0.98	1		0.102451		0.537623	0.188779	0.0642406	0	FALSE
RNASE1	3		0.00103747	0	0.379097	1	1.05621e-14	0	0.254987	1	1		0.329307		1		0.00328882		0.498276	0.294149	0.0692951	0.438982	FALSE
RNASE4	4		0	0	1.64849	1	0	0	1.54585	1	0.000227207	0.311415	0.782202	0.89	1.66341e-08	0	0.208807	1	0.540665	0.34204	0.0644092	0	FALSE
RNF19A	4		2.10559e-06	0	0.424277	1	1		2.11326		2.76945e-05	0.174218	0.493124	0.95	0.3135	0.734357	0.269244	0.66	0.600582	0.181593	0.066559	0	FALSE
RNF24	4		0.00858378	0	0.282482	1	0.0116945	0.356494	2.29917	0.89	9.46624e-06	0.374241	0.665062	0.86	1		0.36417		0.471726	0.312262	0.0672962	0	FALSE
ROCK2	4		0.0152184	0	0.423132	1	4.31198e-07	0	1.47487	1	1		0.119031		1		0.0479615		0.442719	0.145405	0.119389	0	FALSE
ROMO1	4		0	0	0.425394	1	4.83294e-13	0	0.373235	1	0	0	0.470198	1	1		1.08083e-15		0.546379	0.453621	2.00917e-30	0	FALSE
RORA	4		0.00231292	0	0.592445	1	0.285477		0.612602		0	0	1.56795	1	1		0.398181		0.386293	0.315425	0.115455	0	FALSE
RORC	2		0.0522766	0	0.44735	1	1.82871e-15	0	2.10499	1	4.82868e-11	0	2.23079	1	0.0247534	0	0.417093	1	0.738639	0.10883	0.0569421	0	FALSE
RPL11	4		0.0060188	0	0.124528	1	1		0.137894		1		2.19805		1		0.0144608		0.743717	0.231373	0.00988094	0	FALSE
RPL15	4		1.31067e-08	0	0.0770422	1	1		2.33997		1		0.0350226		1		0.0289806		0.722959	0.0498872	0.0316945	0	FALSE
RPL17	4		3.31453e-07	0	0.0683844	1	1		3.11939		0	0	0.643692	1	0	0	0.374131	1	0.774952	0.113045	0.0502762	0	FALSE
RPL22L1	4		0	0	0.485553	1	5.33662e-07	0	1.27685	1	0	0	1.64134	1	1		0.00594435		0.522072	0.371004	0.0541955	0	FALSE
RPL23A	4		0	0	0.327624	1	0	0	2.21424	1	1		0.0285482		0	0	0.178278	1	0.320686	0.08569	0.0837419	0.303676	FALSE
RPL27A	4		0.0381518	0	0.0522386	1	1		2.28163		1		0.0128401		1		0.0434522		0.846818	0.0370036	0.015676	0	FALSE
RPL35	4		0.0260297	0	0.0381068	1	1		2.36521		1		0.0188579		1		0.00581124		0.926374	0.0183381	0.0148181	0	FALSE
RPL37A	4		0.270615	0	0.0466858	1	1		2.1438		1		1.20831		1		0.127059		0.547928	0.374178	0.0325687	0	FALSE
RPL38	4		0.0127391	0	0.188267	1	0.49827		1.9254		1		0.128306		1		0.0102194		0.767133	0.126797	0.079737	0	FALSE
RPL3	4		0.0551667	0	0.0378666	1	1		3.4191		1		0.0868416		1		0.101725		0.698029	0.0434025	0.0332069	0	FALSE
RPLP0	4		0.251193	0	0.0761022	1	0	0	3.13703	1	0	0	0.499808	1	1		0.220994		0.736564	0.142003	0.0420934	0.698133	FALSE
RPLP1	4		0	0	0.336553	1	0.0707514	0	0.216089	1	0	0	0.568226	1	0.0793345	0	0.074177	1	0.602966	0.103253	0.0464426	0.00552169	FALSE
RPP14	4		2.00538e-12	0	0.780623	1	0	0.0566409	2.06703	0.99	0.482165		0.532957		1		0.224709		0.635969	0.271492	0.0578367	0	FALSE
RBM39	4		0.0923967	0	0.136347	1	0	0	1.49918	1	1		0.0862133		1		0.0288997		0.337471	0.281802	0.0926527	0	FALSE
RPS10	4		0.139836	0	0.0553943	1	1		0.168589		1		0.131018		1		0.0640454		0.687157	0.0797033	0.0678461	0	FALSE
RBM25	4		0.00273783	0	0.127136	1	0	0	1.36191	1	1		0.075405		1		0.068006		0.576933	0.158222	0.0792382	0	FALSE
RAD51L3-RFFL	3		2.01536e-06	0	0.737774	1	0.0940626	0.138409	0.73757	0.97	0.0122507	0.0471625	1.03507	0.99	0.744369		0.525262		0.373347	0.270161	0.141852	0	FALSE
PMM2	4		0.00609289	0	0.397323	1	0	0	2.17052	1	7.53429e-14	0	0.731855	1	1		0.078928		0.640318	0.121684	0.0667699	0	FALSE
PNPLA2	4		0.114111	0	0.215011	1	0.174174		1.7249		1		0.284427		1		0.0833977		0.468735	0.335822	0.0752258	0	FALSE
POGZ	4		0.00054197	0	0.600554	1	0.0170169	0.333886	2.01399	0.9	1		0.239545		1		0.21107		0.541481	0.253832	0.112474	0.578864	FALSE
POLD1	2		0.00530281	0	0.489807	1	0.00157793	0.440598	1.41658	0.85	0.130772	0.14656	0.316695	0.96	0.0414592	0.0469097	0.436467	0.99	0.703165	0.132429	0.091551	0	FALSE
POLR1D	4		0	0	0.927457	1	0	0	1.89427	1	0.196559	0.0853416	0.936997	0.98	1		0.123442		0.706655	0.214178	0.034756	0	FALSE
POLR2A	4		0.0388012	0	0.23578	1	1		1.03958		0.669809		0.427556		1		0.16805		0.338333	0.175404	0.0822788	0	FALSE
POLR3E	4		0.0508096	0	0.538539	1	0.0194992	0.0566409	0.546116	0.99	1		0.191819		1		0.404321		0.466669	0.177068	0.108232	0	FALSE
PON2	4		2.20775e-05	0	0.25376	1	0	0	3.06568	1	0	0	1.83147	1	2.66656e-06	0	0.814858	1	0.567351	0.134327	0.111198	0	FALSE
PORCN	4		0.138696	0	0.264394	1	0.020034	0.333886	2.13352	0.9	1		0.49139		0.689421		0.55497		0.512406	0.201985	0.151938	0	FALSE
PPAT	3		0.000605517	0	0.692373	1	9.23189e-07	0	1.71953	1	0.00498652	0	0.464539	1	1		0.137716		0.559762	0.134563	0.121809	0	FALSE
PPP1R12A	4		1.07387e-10	0	0.248829	1	5.48734e-05	0.0993222	1.36578	0.98	0	0	0.937461	1	1		0.147171		0.344486	0.280502	0.189543	0	FALSE
PPP2R5C	4		0.114534	0	0.178318	1	0	0	3.37635	1	1		0.349459		0.20073	0.0469097	0.159587	0.99	0.496017	0.0959438	0.087881	0	FALSE
PQBP1	4		0.0124719	0	0.154504	1	1		2.44501		0.136872	0.0471625	0.576372	0.99	1		0.215732		0.582539	0.18654	0.0976336	0	FALSE
PRCD	4		8.58418e-09	0	1.21511	1	0.179552		0.546663		6.45833e-05	0	1.02376	1	1.93412e-11	0	1.18233	1	0.313702	0.226766	0.121256	0	FALSE
PREP	4		0.000741109	0	0.27333	1	0	0	2.75305	1	1		0.345033		1		0.165135		0.763769	0.126388	0.0341352	0	FALSE
PRKAA1	4		0.000493304	0	0.475188	1	7.09825e-15	0	1.59041	1	1		0.00311619		0.295023	0.0469097	0.136079	0.99	0.701199	0.103102	0.0769321	0	FALSE
PRKACB	3		1.85553e-07	0	0.836049	1	2.50736e-06	0.333886	1.22397	0.9	1		0.0525877		0.647906		0.213338		0.443584	0.232757	0.0787067	0	FALSE
PRKAR1A	4		0.000575603	0	0.377608	1	0	0	1.72043	1	3.90344e-08	0	0.305852	1	0.00235731	0	0.203542	1	0.432486	0.137204	0.097476	0	FALSE
PRMT2	4		0.00504825	0	0.288557	1	1.16858e-07	0	0.883018	1	1.93236e-05	0	1.67438	1	0	0	0.760241	1	0.402863	0.340772	0.106223	0	FALSE
PRPF38B	4		0	0	0.53865	1	0	0.0566409	1.0886	0.99	0.294826		0.564333		0.013113	0.114816	0.25852	0.97	0.374399	0.218104	0.157558	0	FALSE
PSAP	4		0	0	0.145957	1	0	0	4.37715	1	0	0	2.32291	1	1		0.168015		0.526042	0.261217	0.0354019	0	TRUE
PTAFR	2		6.63345e-13	0	3.10646	1	5.10191e-06	0	1.73995	1	1		0.253186		1		0.263091		0.54228	0.199075	0.100948	0	FALSE
PTPA	4		3.20304e-08	0	1.48693	1	3.3181e-09	0.333886	2.3924	0.9	1.1069e-05	0	1.21052	1	0.000491425	0.483363	0.938175	0.8	0.616222	0.170195	0.110695	0	FALSE
PTPRE	4		0	0	0.649434	1	0	0	1.4046	1	0	0	1.08072	1	0.049749	0.779828	0.590592	0.63	0.402456	0.199361	0.112498	0.440925	FALSE
PYCR1	3		0.183736	0	0.450944	1	0.781855		1.00374		4.32058e-07	0.224022	1.69237	0.93	1		0.113472		0.419492	0.318362	0.0641424	0	FALSE
RAB33A	4		0	0	1.10277	1	7.75247e-09	0.230835	0.84467	0.94	1		0.0154902		0.128548	0.69729	0.194879	0.68	0.382698	0.279421	0.0994732	0	FALSE
RAB38	2		0.181856	0	0.364006	1	0	0	1.36945	1	0.109556	0	0.481949	1	1		0.0259858		0.464818	0.18609	0.126448	0.952859	FALSE
RABGAP1L	4		0	0	0.470546	1	1.3711e-05	0	1.06896	1	0.00228762	0	0.449039	1	0.137043	0.114816	0.23857	0.97	0.347866	0.142567	0.103143	0	FALSE
RAC1	4		0.235812	0	0.166289	1	1		0.529821		1		1.10944		1		0.100743		0.528726	0.21287	0.0824232	0	FALSE
RAPGEF5	3		0.000346492	0	0.732884	1	0.0156875	0.440598	1.07231	0.85	0.805234		0.322667		0.00881646	0.083524	0.55232	0.98	0.510095	0.0918654	0.08379	0	FALSE
EPS8	4		0.000968757	0	0.264281	1	0	0	2.93405	1	1.99171e-09	0	1.33857	1	0.00903865	0.32489	0.502898	0.88	0.636343	0.157058	0.0714375	0	FALSE
RPS19	4		0.116496	0	0.0376425	1	1		2.81354		1		0.914747		1		0.044069		0.625995	0.180661	0.0407725	0	FALSE
RPS25	4		0.0148977	0	0.0867125	1	1		0.695095		0.0197255	0	0.398414	1	0.522703		0.173039		0.447224	0.190891	0.147311	0	FALSE
SH3KBP1	4		0.000332734	0	0.349321	1	0.485715		2.14665		0.00394893	0	0.300769	1	9.56353e-07	0	0.709209	1	0.488908	0.178866	0.135312	0	FALSE
SH3PXD2B	2		0.0964466	0	0.317363	1	1		1.01809		1		0.978774		1		0.170183		0.442178	0.184294	0.0992329	0	FALSE
SHISA5	4		0	0	0.506811	1	0	0	1.05301	1	0	0	1.78351	1	0.00304627	0	0.135299	1	0.492412	0.288502	0.0787138	0	FALSE
SIPA1	4		0.0168432	0	0.205475	1	0.07272	0.534129	1.48828	0.8	1		0.0674012		1		0.0164133		0.491001	0.199161	0.0864033	0	FALSE
SIRT6	4		2.47105e-06	0	0.719654	1	2.19157e-10	0.25857	2.24187	0.93	2.95174e-07	0.0471625	0.435325	0.99	1		0.0921333		0.614366	0.190704	0.117953	0	FALSE
SKP1	4		0	0	0.345512	1	0	0	3.33019	1	1.5351e-08	0	0.272397	1	0	0	1.14439	1	0.709134	0.130782	0.0854266	2.85599	FALSE
SLC12A6	3		3.21928e-07	0	0.929059	1	1		0.264515		0.658358		0.462917		1		0.057944		0.23199	0.15068	0.106658	0	FALSE
SLC25A13	4		6.17622e-08	0	0.356504	1	5.16206e-13	0	1.96119	1	0.0318055	0.14656	0.581351	0.96	4.227e-05	0.0469097	0.592535	0.99	0.409687	0.185489	0.129916	0	FALSE
SLC7A8	3		0.0392201	0	0.13701	1	1		2.73844		0	0	2.77732	1	1		0.15862		0.487783	0.347036	0.0395858	0	FALSE
SLCO4A1	3		0.0157014	0	0.540505	1	0.000217428	0.202309	2.5646	0.95	0.022129	0.0471625	0.364806	0.99	7.32626e-05	0	0.809084	1	0.534592	0.11229	0.109342	0	FALSE
SLTM	4		3.27077e-10	0	0.194698	1	0	0	2.28161	1	1		0.0528136		0.600866		0.168796		0.529376	0.100303	0.0698134	0	FALSE
SMAGP	3		1.17172e-05	0	0.385475	1	0	0	1.41246	1	1		0.480907		1		0.183217		0.666801	0.207625	0.120022	0	FALSE
SMARCA5	4		0.101977	0	0.20953	1	0.895384		0.750401		1		0.0106033		2.32665e-07	0	0.270623	1	0.584573	0.180277	0.0643248	0	FALSE
SMARCE1	4		0.203226	0	0.10251	1	0	0.0993222	3.0677	0.98	1		0.0412927		1		0.0359181		0.786788	0.164078	0.0141301	0	FALSE
SMG6	4		2.46037e-05	0	0.742177	1	3.47906e-07	0.0566409	0.800029	0.99	1		0.129361		1		0.017032		0.393225	0.11275	0.092738	0	FALSE
SMPD4	4		0.0318166	0	0.507654	1	0.264992		1.02415		1		0.222894		0.154085	0.0469097	0.39564	0.99	0.461488	0.159561	0.128007	0	FALSE
SMS	4		0.000734721	0	0.607255	1	0	0.0993222	3.10252	0.98	0.537306		0.306615		1		0.0807377		0.810291	0.0990717	0.0450888	0	FALSE
SMTNL2	2		5.39494e-06	0	2.08177	1	0.245251		1.77305		0.0391682	0.332867	0.863194	0.88	1		0.0303555		0.56362	0.250931	0.118603	1.56451	FALSE
SMYD4	4		9.48799e-06	0	0.524764	1	0.119997	0.283304	0.691768	0.92	0.001764	0.433895	0.668869	0.83	0.310973	0.114816	0.318475	0.97	0.450999	0.146714	0.0901837	0	FALSE
SNED1	4		9.69486e-15	0	0.755426	1	1.82753e-11	0	1.19777	1	1		0.0180989		2.46246e-08	0	0.676278	1	0.284868	0.210568	0.145452	1.08829	FALSE
SNHG11	4		1.8585e-05	0	0.37492	1	8.97984e-11	0	1.58651	1	1.8416e-07	0	1.30344	1	1		0.176251		0.465348	0.291883	0.161282	1.86007	FALSE
SNRNP200	4		0	0	0.54136	1	0.0650458	0.672868	1.32412	0.72	0.122779	0	0.417934	1	1		0.246791		0.455458	0.189622	0.0657021	0	FALSE
SOCS2	4		0.0748831	0	0.582588	1	1.54953e-06	0.0993222	0.553014	0.98	0.00805016	0	0.593748	1	0.149027	0	0.160566	1	0.517099	0.194497	0.16314	0	FALSE
SORBS2	3		7.4344e-06	0	0.390558	1	9.49182e-06	0	1.64489	1	0.166532	0.224022	0.335549	0.93	5.27443e-08	0	1.02581	1	0.390731	0.112882	0.0978392	1.06838	FALSE
SP140L	4		0.000211209	0	0.347766	1	1		1.28753		1		0.342365		1		0.277075		0.429943	0.243454	0.0930115	0	FALSE
SPARCL1	4		0.000544332	0	0.11224	1	0.0305772	0	3.72781	1	1		0.74641		0.109936	0.141281	0.322801	0.96	0.801688	0.0981362	0.0349631	0.0438376	TRUE
SPECC1	3		3.53421e-12	0	0.742165	1	1.47066e-10	0	1.45472	1	2.09099e-06	0	0.705961	1	1		0.0490316		0.284242	0.219649	0.107737	0	FALSE
SREK1	4		0.00124427	0	0.358087	1	0	0	1.2551	1	0.578575		0.254085		1		0.0521844		0.471607	0.179062	0.103327	0	FALSE
SRGAP1	4		0.0713589	0	0.292104	1	1.23315e-08	0	2.17302	1	1		0.325117		1		0.0149019		0.463532	0.16233	0.0905021	0	FALSE
SGMS1	4		0.0747483	0	0.297165	1	1		0.953593		1.2423e-05	0	0.560364	1	5.16852e-13	0	1.025	1	0.456674	0.176413	0.124612	0.0681863	FALSE
RPS24	4		0	0	0.318072	1	0	0	1.11815	1	0	0	1.17229	1	0	0	0.56562	1	0.531113	0.27069	0.100352	0	FALSE
SFXN1	3		6.01906e-06	0	0.377534	1	0.000279563	0.0566409	1.15236	0.99	1		0.0183723		1		0.0788779		0.745295	0.116196	0.0568584	0.453232	FALSE
SF1	4		0.000270713	0	0.307867	1	0	0	1.14216	1	1		0.010052		1		0.00219032		0.422842	0.184311	0.125461	0	FALSE
RPS27	4		0.0127486	0	0.0448128	1	0.0198818	0	2.54702	1	1		0.0973007		1		0.000732266		0.973555	0.015118	0.00477207	0	FALSE
RPS3	4		0.171421	0	0.0295214	1	1.33248e-05	0	2.81857	1	1		0.34177		1		0.307416		0.301205	0.131256	0.0834229	0	FALSE
RPS6KA1	2		0.00271685	0	0.24189	1	3.11523e-06	0	1.72902	1	0.444774		0.382309		0.0467897	0	0.301571	1	0.531703	0.26357	0.0598841	0	FALSE
RPSA	4		0.254749	0	0.0355915	1	1		2.4709		1		0.0689212		1		0.032737		0.748508	0.0628407	0.0539592	0	FALSE
RSRC2	4		4.44546e-05	0	0.330061	1	0	0	1.77414	1	0.398151		0.140985		1		0.123665		0.346758	0.189956	0.123807	0	FALSE
RSRP1	4		0	0	0.565794	1	0	0	2.52487	1	0.0696919	0.224022	0.599652	0.93	1		0.0641991		0.501639	0.197353	0.0533611	0	FALSE
RTN4	4		4.07206e-05	0	0.26462	1	0	0	3.90675	1	0	0	1.70191	1	0	0	0.476556	1	0.499293	0.259935	0.0637485	0	TRUE
RUBCN	4		4.73553e-07	0	0.56359	1	0	0	2.35152	1	1		0.0605049		1		0.157947		0.572152	0.246199	0.0773724	0.394563	FALSE
S100A16	3		0	0	0.969854	1	5.17267e-05	0	0.329321	1	0	0	1.0373	1	0	0	0.692506	1	0.352605	0.249278	0.234935	0	FALSE
S100A4	4		3.59248e-08	0	0.256396	1	1		1.25949		1		0.357862		1		0.261549		0.556283	0.190135	0.15496	0	FALSE
SACM1L	4		0.097762	0	0.600652	1	0.00269441	0.514929	1.68973	0.81	0.976234		0.512537		1		0.107024		0.654732	0.169201	0.0721349	0	FALSE
SAT1	4		0	0	0.478713	1	0	0	2.37667	1	0	0	0.332855	1	1		0.0103394		0.770757	0.174709	0.0181985	0	FALSE
SBDSP1	4		0.103206	0	0.369618	1	0.0102903	0.170763	0.530498	0.96	2.20208e-10	0.174218	1.63749	0.95	0.774206		0.220904		0.507211	0.351459	0.0815888	0	FALSE
SC5D	3		0.034697	0	0.185511	1	1		1.98117		1		0.163533		1		0.0770947		0.828935	0.116616	0.0302854	0	FALSE
SCAPER	4		0.0308177	0	0.203187	1	1.19307e-07	0.0993222	2.73483	0.98	1		0.104569		1		0.245766		0.495471	0.122851	0.0776156	0	FALSE
SCNN1B	3		2.54186e-05	0	0.631422	1	1		1.95419		1.90816e-07	0	1.75902	1	1		0.0268866		0.660079	0.1741	0.0391462	0.0666094	FALSE
SDC2	3		0.0325668	0	0.61329	1	3.46607e-08	0	1.6643	1	0.134258	0	0.540221	1	0.0118128	0	0.289465	1	0.423304	0.23991	0.0801946	0.800937	FALSE
SDCCAG8	4		0	0	2.31529	1	0	0.0993222	2.31768	0.98	1		0.0684837		1		4.94538e-16		0.994721	0.00527853	1.12791e-31	0	FALSE
SDR39U1	4		0.120599	0	0.14395	1	0.767883		1.18106		1		0.364558		0.774295		0.211747		0.468697	0.161849	0.112221	0	FALSE
SEC14L1	4		9.31188e-09	0	0.974332	1	1.30474e-09	0	1.43335	1	1		0.0120114		0.227312	0.0469097	0.238625	0.99	0.505988	0.128001	0.0768021	1.27561	FALSE
SEC1P	2		1.9951e-13	0	1.30393	1	5.63827e-05	0.641445	1.28279	0.74	0.10505	0.0471625	0.304114	0.99	1		0.00618273		0.436987	0.386385	0.0813803	0.443537	FALSE
SECISBP2	4		0.000458639	0	0.241983	1	0	0	2.1712	1	0.0126436	0	0.38468	1	6.83679e-05	0	0.262592	1	0.463854	0.106403	0.086666	0	FALSE
SEL1L3	2		0.112782	0	0.125969	1	3.83318e-05	0.0566409	1.54831	0.99	6.46919e-06	0	0.543802	1	1		0.133875		0.487427	0.1361	0.0762993	0	FALSE
SEPTIN6	4		2.80673e-08	0	0.306069	1	0.000545676	0.440598	2.53615	0.85	0	0	2.27813	1	2.53806e-07	0	0.662808	1	0.545484	0.153706	0.100781	0.00172434	FALSE
SEPTIN9	4		4.35237e-05	0	0.71667	1	5.54979e-11	0	0.854758	1	0.00510267	0	0.345983	1	1		0.0144279		0.27191	0.221439	0.0869943	0	FALSE
SERPINB1	4		0.0837443	0	0.132235	1	0.000939245	0	3.56823	1	1		0.0731301		1		0.0338944		0.777449	0.0752914	0.0522504	0	TRUE
SERPINB6	4		0.00543117	0	0.185841	1	0	0	2.69448	1	0.348978		0.825581		4.19621e-08	0	0.445312	1	0.582229	0.172514	0.0591619	0	FALSE
SERPINB9	3		6.86891e-07	0	0.555983	1	8.59216e-07	0.25857	2.0198	0.93	0.0301292	0.0471625	0.749456	0.99	1		0.104325		0.638357	0.174294	0.0897822	0.0437317	FALSE
SERPINF1	3		8.91083e-06	0	0.561566	1	0	0	3.34424	1	1		0.0394999		0.0210985	0	0.299774	1	0.604147	0.0639496	0.05883	0	FALSE
SF3B3	4		0.00715588	0	0.253892	1	1		0.710904		1		1.21378		1		0.505526		0.542181	0.122168	0.0615222	0	FALSE
EPHX1	4		0.016348	0	1.27757	1	2.79983e-08	0	2.47674	1	1		0.0667155		1		0.134007		0.788678	0.0819076	0.0471911	0	FALSE
MTG1	4		1.73138e-08	0	0.235663	1	0	0	3.66843	1	0	0	1.56301	1	0	0	0.468787	1	0.695528	0.136232	0.0521883	0	TRUE
CASP8	3		0.00965314	0	0.318917	1	0.05941	0.37737	1.76718	0.88	0.864481		0.487289		6.9928e-07	0	1.38131	1	0.280147	0.142249	0.114127	0.423321	FALSE
CHD9	4		1.68726e-06	0	0.442015	1	3.99486e-07	0.0566409	0.570963	0.99	0.000218953	0	0.307595	1	1		0.0708876		0.211856	0.172035	0.0904497	0	FALSE
CHD2	4		3.66003e-07	0	0.378653	1	0.000124965	0.0566409	1.07427	0.99	0.0163754	0.0471625	0.551594	0.99	0.131586	0.764717	0.391268	0.64	0.284077	0.169921	0.0847268	0	FALSE
BANK1	3		3.73818e-07	0	0.415943	1	3.05276e-07	0	1.65801	1	1		0.722079		0.264706	0.083524	0.508746	0.98	0.479866	0.187473	0.136699	0	FALSE
BANP	4		0.000423232	0	0.413832	1	0.00169787	0.0566409	1.0725	0.99	1		0.244152		1		0.259799		0.337836	0.182812	0.16445	0.511256	FALSE
BCAR3	4		1.84304e-05	0	0.708243	1	0.215199		0.965194		1		0.107361		0.420699	0.483363	0.329921	0.8	0.555995	0.108106	0.0792802	0	FALSE
BCAT1	3		1.50396e-07	0	0.855567	1	9.87727e-13	0.0566409	2.51356	0.99	3.96279e-05	0.0471625	0.632607	0.99	1		0.169496		0.549426	0.165125	0.0966802	0.118128	FALSE
BCAT2	4		0.0064974	0	0.177591	1	0	0.481448	3.87068	0.83	2.55965e-06	0.200259	0.865962	0.94	1		0.144174		0.758378	0.137425	0.0458962	0	FALSE
BCL6	4		0.00107433	0	0.315521	1	1.77305e-13	0	1.84057	1	4.60851e-06	0	0.338118	1	1		0.110001		0.506599	0.196487	0.116081	0	FALSE
CHD1L	4		0.019185	0	0.229589	1	1		0.389758		0.902691		0.151697		1		0.0858139		0.311774	0.145238	0.0933221	0	FALSE
BDKRB1	2		0.0213207	0	0.869005	1	0.00318188	0	0.866204	1	1		0.0100685		1		0.0849327		0.920676	0.0528054	0.0265183	0	FALSE
DCN	2		1.88148e-07	0	0.105581	1	0	0	1.84777	1	3.55743e-06	0	2.39138	1	0.232658	0	0.255701	1	0.43961	0.20396	0.0696498	1.90723	FALSE
BIN1	4		8.37182e-08	0	0.38013	1	0	0	2.96346	1	0	0	0.627315	1	0	0	1.34909	1	0.485384	0.208459	0.111626	0	FALSE
CHCHD7	4		0.000141697	0	0.497672	1	0	0	0.874425	1	0.00628825	0	1.25815	1	1		0.354658		0.540601	0.229789	0.184461	0	FALSE
BLOC1S6	4		3.57029e-06	0	0.468321	1	0.370541		0.781017		1		1.00079		1		0.341691		0.446652	0.206991	0.121922	0	FALSE
BLVRA	4		0.00493662	0	0.142809	1	0	0.787329	5.27456	0.35	1		0.331024		1		0.0297195		0.868878	0.0864176	0.013717	0	FALSE
CFLAR	4		0.257633	0	0.12419	1	0	0	1.76694	1	0	0	1.59335	1	0.0164262	0	0.290377	1	0.299142	0.199101	0.103041	0	FALSE
DCTN2	4		0.000270713	0	0.319605	1	0	0.230835	4.56957	0.94	0.00190327	0	0.636235	1	1		0.0336896		0.793019	0.0820402	0.0589576	2.64171	FALSE
BST1	3		0.059709	0	0.292574	1	2.86892e-07	0	1.95446	1	1		0.0850056		1		0.0142816		0.568145	0.260401	0.0567954	0	FALSE
BTF3	4		0.0134106	0	0.121435	1	1		2.32638		1		0.660002		1		0.356566		0.523029	0.235347	0.168745	0	FALSE
BUB3	4		1.12011e-07	0	0.326252	1	0	0	2.16661	1	0	0	1.32221	1	1		0.0559425		0.571876	0.35987	0.022427	0	FALSE
C11orf54	4		8.25858e-09	0	0.403237	1	1		2.29634		3.50617e-06	0.0471625	0.438685	0.99	1		0.353909		0.552663	0.154772	0.0875977	0	FALSE
CFDP1	4		0	0	1.08619	1	0.0599788	0	1.37219	1	0	0	1.44734	1	0	0	0.821365	1	0.566694	0.218692	0.0739943	0	FALSE
CTNND1	4		0.00148318	0	0.215655	1	3.82841e-10	0	1.12641	1	7.95042e-09	0	0.730385	1	0.819054		0.195614		0.329506	0.205397	0.123492	0	FALSE
AZIN1-AS1	3		0.0130323	0	0.381502	1	0.531443		0.882699		0.00958302	0.758119	0.731009	0.65	1		0.101669		0.33378	0.187966	0.126886	0	FALSE
ATXN7	4		0.000866205	0	0.332348	1	0.86621		1.53707		9.44467e-06	0	0.789014	1	1		0.177392		0.428951	0.231535	0.0823987	0	FALSE
DNM3	4		7.83344e-08	0	1.20578	1	4.74587e-08	0	1.41804	1	1		0.213614		1		0.212905		0.297886	0.0959515	0.0774039	0	FALSE
ATP9B	4		0.00108956	0	0.737057	1	0.283596		0.856796		1		0.356812		1		0.59979		0.311714	0.164008	0.086649	0	FALSE
DUSP1	4		1.63773e-10	0	0.120612	1	0	0	3.01725	1	0	0	0.86774	1	0	0	1.1665	1	0.338801	0.126084	0.0960438	1.20789	FALSE
ARHGEF3	4		0.0194401	0	0.436928	1	0	0.230835	2.11127	0.94	4.61924e-13	0.0471625	0.925442	0.99	0.0378672	0	1.19316	1	0.542107	0.214165	0.0808974	1.45663	FALSE
ARID5B	4		0.0478011	0	0.0819734	1	0	0	2.72211	1	0	0	1.05399	1	0.000234035	0	0.156366	1	0.565175	0.266434	0.0580925	0	FALSE
ARIH2	4		0.0774599	0	0.146515	1	0.00542287	0.308812	1.67372	0.91	0.0067488	0.174218	0.554896	0.95	1.74801e-05	0.141281	1.12866	0.96	0.408966	0.241396	0.132836	0	FALSE
ARL10	4		1.33646e-06	0	0.390668	1	1		0.0691732		1		0.0187744		0.051538	0.114816	0.53629	0.97	0.446742	0.120241	0.0888631	0	FALSE
ARL16	4		0	0	0.758838	1	0	0	1.53849	1	0	0	1.3807	1	0.0079561	0.141281	0.212559	0.96	0.620291	0.216573	0.0660279	0	FALSE
DST	4		4.02816e-06	0	0.749427	1	1		0.407605		1		0.0752419		1		0.109758		0.195701	0.129463	0.108796	0	FALSE
DSTN	4		5.34324e-05	0	0.218914	1	0	0	2.28744	1	1		0.22763		1		0.0924052		0.834867	0.112661	0.0157959	0	FALSE
CD27-AS1	4		0.000219651	0	0.70204	1	4.0831e-14	0	2.49365	1	1		0.437945		0	0	0.981122	1	0.26957	0.197262	0.130104	2.42847	FALSE
ARL5B	4		0.050776	0	0.585191	1	1.01472e-05	0.0993222	1.91898	0.98	1		0.338679		1		0.356218		0.611712	0.267974	0.0598577	1.22913	FALSE
ARMC9	2		0.211857	0	0.489827	1	0	0	2.57253	1	1		0.0509498		1		0.060157		0.455458	0.154878	0.069959	0.552078	FALSE
C1orf43	4		0	0	0.300888	1	0	0	1.80717	1	0	0	1.41913	1	0.00234784	0.083524	0.570478	0.98	0.5832	0.279715	0.0497982	0	FALSE
ARMH1	2		0.000389855	0	0.41857	1	0.578891		0.658917		0.0056731	0.0471625	0.655809	0.99	0.143382	0.0469097	0.681569	0.99	0.265431	0.196508	0.153902	0	FALSE
ARPC1B	4		0.196533	0	0.0496124	1	1		4.7163		1		0.100205		1		0.0115853		0.814171	0.110791	0.0262269	0.0119149	FALSE
DBI	4		0.00448169	0	0.214378	1	1		2.10204		1		0.0283481		1		0.016511		0.788833	0.0850034	0.0655326	0	FALSE
ARSG	2		0.00022588	0	0.890555	1	0.00266791	0.138409	1.0828	0.97	1		0.0415078		1		0.0681652		0.479937	0.126988	0.0905822	0	FALSE
CHPF	3		0	0	1.17455	1	0.847216		0.855427		0	0	0.690999	1	0.727126		0.10615		0.728634	0.198071	0.0595229	0.121079	FALSE
ASPH	4		0.0148755	0	0.252242	1	0	0	2.7619	1	0.00827683	0	0.243957	1	0.282769	0.558072	0.408296	0.76	0.540651	0.0882309	0.0750895	0	FALSE
ATM	4		1.77229e-07	0	1.12701	1	0	0.138409	2.4926	0.97	1		0.0809452		1		0.10072		0.544662	0.0936549	0.0507388	0	FALSE
ATP13A4	2		0.00050289	0	1.20876	1	6.69601e-07	0	0.698839	1	1		0.159929		1		0.125822		0.253481	0.153302	0.100112	0.422952	FALSE
ATP5F1A	4		0.000255669	0	0.0673572	1	1		4.97717		1		0.0151233		1		0.0567959		0.866401	0.0455248	0.0254198	0	FALSE
ATP5F1C	4		0.160808	0	0.171401	1	0	0	3.81795	1	0	0	0.490713	1	1		0.104435		0.593619	0.129349	0.0982911	0	TRUE
CHKB	4		8.0069e-06	0	0.289925	1	0	0.0566409	2.22209	0.99	0.328928		0.189346		0.0664668	0.190729	0.677676	0.94	0.573303	0.157752	0.0895437	0	FALSE
ATP5MD	4		0	0	0.5565	1	0	0	1.91769	1	0	0	0.614768	1	0	0	0.28537	1	0.790977	0.161605	0.0280583	0.538935	FALSE
CHRM3	2		1.51572e-05	0	1.27574	1	0.0161156	0	0.793973	1	1		0.111496		1		0.023241		0.337475	0.217593	0.117449	0	FALSE
C1orf52	4		0	0	0.719115	1	0	0.0993222	1.98841	0.98	0.105421	0.269412	0.369816	0.91	1		0.0561861		0.938369	0.02598	0.0211227	0	FALSE
C3orf52	3		0.0764139	0	0.556239	1	0	0	2.37401	1	1		0.20927		1		0.0266457		0.392281	0.279563	0.115149	0	FALSE
C4orf33	4		0.000980315	0	0.23659	1	1		2.47707		6.46937e-06	0.0853416	0.721084	0.98	1		0.156622		0.711388	0.16611	0.0581718	0	FALSE
CDK2AP1	4		0.096263	0	0.248968	1	0.0233237	0.25857	2.32654	0.93	1		0.0923575		1		0.0689827		0.800579	0.0589431	0.0297074	0	FALSE
CAV1	4		3.29625e-13	0	0.21982	1	0.00957914	0	0.61575	1	0	0	1.58667	1	1		0.0868762		0.704901	0.214954	0.0198905	0.630485	FALSE
CBFB	4		0.000179072	0	0.449959	1	1		1.9903		0.16181	0.951075	0.323268	0.53	0.422237	0.664426	0.196114	0.7	0.605703	0.142085	0.130509	0	FALSE
DDR2	2		0.0217173	0	0.174708	1	1.47118e-06	0	2.489	1	1		0.0681742		1		0.0891453		0.511137	0.159605	0.065131	0	FALSE
CBY1	4		1.74686e-05	0	0.324191	1	0	0	2.42936	1	0.0082824	0.0471625	0.495297	0.99	1		0.0599008		0.579847	0.232993	0.0807717	0.273075	FALSE
CCAR1	4		0.0487308	0	0.102942	1	0	0	1.6582	1	1		0.0147803		1		0.201087		0.516083	0.145626	0.0732411	0	FALSE
CCDC122	3		0.000133403	0	1.05936	1	2.41927e-14	0	1.10629	1	1		0.0757118		1		0.0312247		0.534753	0.222729	0.138747	1.06882	FALSE
CDK11B	4		0.178071	0	0.264208	1	1		0.161171		1		0.0771685		1		0.0287137		0.341408	0.248683	0.204613	0	FALSE
CCDC130	4		1.7457e-10	0	0.394571	1	3.90314e-05	0.283304	1.63838	0.92	1.64441e-10	0	0.760154	1	0.00924604	0.083524	0.299152	0.98	0.541138	0.190659	0.0867701	0.429453	FALSE
CD74	4		0	0	0.171774	1	1		0.793233		1		0.177174		1		0.303932		0.18333	0.122295	0.0972205	0	FALSE
CCDC174	4		3.6625e-14	0	0.767862	1	3.5866e-14	0	1.56336	1	1		0.394184		0	0.422576	0.821968	0.83	0.542673	0.230503	0.0859433	0	FALSE
CDK5RAP3	4		2.90749e-05	0	0.182555	1	0	0	2.67471	1	0	0	0.422968	1	0.0382426	0	0.520252	1	0.667624	0.0894649	0.083937	0	FALSE
CCDC18-AS1	4		0.0149423	0	0.432195	1	0.210253		1.07198		2.50835e-10	0	0.702853	1	1		0.0499707		0.306208	0.181164	0.0949731	0	FALSE
CCDC50	4		0.00267396	0	0.140059	1	0	0	2.96654	1	1		0.306821		1		0.000711054		0.722183	0.161982	0.060178	0	FALSE
CCDC57	3		0.0548712	0	0.531559	1	3.17008e-09	0	1.69758	1	0.170812	0	0.408733	1	0.477659		0.212794		0.497975	0.167782	0.0904648	0	FALSE
CCDC88B	2		0.0382076	0	0.355301	1	1		0.042745		1		0.134356		0.00658958	0.141281	0.441595	0.96	0.586581	0.243202	0.060092	0	FALSE
CD63	4		0.00695247	0	0.0481337	1	1		3.39321		1		0.468178		1		0.119518		0.663807	0.158442	0.029356	0	FALSE
CD59	4		9.69486e-15	0	0.417662	1	0	0	2.1057	1	0	0	1.27673	1	1		0.163619		0.675598	0.200594	0.0357868	0	FALSE
DENND2D	2		0.000101309	0	0.396611	1	0.683114		2.26327		0	0	1.09274	1	8.74028e-08	0	0.49905	1	0.446555	0.161074	0.131256	0	FALSE
CD44	4		0	0	0.523482	1	0	0	2.65563	1	0.130058	0.966094	1.49771	0.48	1		0.111855		0.426906	0.24443	0.0573364	0	FALSE
CCND1	4		0.0207084	0	2.20534	1	1.61672e-12	0	2.20911	1	1		0.0576411		0.142814	0	0.383249	1	0.741028	0.0803159	0.0643897	0	FALSE
CD36	4		1.41262e-05	0	0.256024	1	0	0	3.399	1	0	0	2.63769	1	0.806252		0.328436		0.575699	0.225327	0.0795065	0	FALSE
CCNL1	4		0.000706754	0	0.19224	1	0	0	1.91275	1	1.39436e-10	0	0.795968	1	1		0.0413685		0.484516	0.280145	0.143823	0	FALSE
CD27	4		0	0	3.02306	1	0	0	0.936586	1	0	0	3.0429	1	0	0	0.743713	1	0.298052	0.235519	0.115816	0.000785871	FALSE
CD68	3		0.0327789	0	0.0944226	1	1		2.63579		1		0.314067		1		0.0683819		0.582383	0.230865	0.0643682	0	FALSE
ARHGEF2	4		2.72207e-13	0	0.862748	1	0.544164		0.289051		0.00426064	0.174218	0.52681	0.95	1		0.0907938		0.320723	0.198459	0.160723	0.448949	FALSE
DHRS1	4		3.49158e-05	0	0.706119	1	0.0261474	0.138409	0.645049	0.97	1		0.139933		0.22906	0.0469097	0.22848	0.99	0.253577	0.222799	0.137658	0	FALSE
CASK	3		3.11089e-06	0	0.571646	1	0.154508		1.17915		0.103162	0.0471625	0.636219	0.99	0.00152928	0.0469097	0.66214	0.99	0.32119	0.257462	0.167253	0	FALSE
C6orf62	4		0.18149	0	0.193416	1	1		2.56617		1		0.403199		1		0.17329		0.575398	0.260114	0.0492396	0	FALSE
CEP41	4		0.000877944	0	0.622686	1	0.0450456	0.420731	1.8042	0.86	1		0.203179		1		0.291997		0.645648	0.220335	0.0606951	0	FALSE
CEP250	3		2.41577e-07	0	0.708872	1	1		0.477783		1.26682e-05	0	1.43335	1	1		0.0543883		0.319973	0.252868	0.0768703	0	FALSE
DDHD2	4		1.49182e-06	0	0.599595	1	1		0.268801		1		0.171494		1		0.19422		0.286048	0.175745	0.109705	0	FALSE
DMRT2	2		0.000248049	0	1.12392	1	0.481137		1.18089		0.00110918	0.0471625	0.669528	0.99	1		0.323303		0.52583	0.358864	0.0591075	0	FALSE
DMAP1	4		0.0133219	0	0.213858	1	0.0233874	0.230835	1.82115	0.94	1		0.281333		0.0456821	0.083524	0.266629	0.98	0.607143	0.161967	0.0783076	0	FALSE
CA12	2		4.77519e-09	0	0.982971	1	0.365613		2.05206		0	0	2.71079	1	1		0.255029		0.427609	0.374429	0.0779139	0	FALSE
CEP135	4		0.00769139	0	0.92374	1	0.000705479	0.94341	1.17529	0.54	0.00160339	0.0471625	1.28886	0.99	1		0.181414		0.346702	0.268391	0.083232	0.614319	FALSE
CA1	2		1.43924e-05	0	0.639147	1	0	0	2.51426	1	1		0.103631		0.595267		0.322197		0.676738	0.149423	0.0684832	0	FALSE
CENPX	4		1.03758e-05	0	0.240175	1	0	0.333886	2.45478	0.9	1		1.40019		1		0.042668		0.739723	0.186952	0.0313708	0	FALSE
CA5BP1-CA5B	4		0.0049417	0	0.541491	1	0.000323852	0.399314	1.29074	0.87	0.675844		0.506166		1		0.187388		0.392348	0.244385	0.169319	0	FALSE
DHRS4L2	3		9.67549e-11	0	1.09048	1	0.00794168	0.138409	0.798066	0.97	2.11206e-10	0	0.900949	1	1		0.0122493		0.439768	0.278882	0.119271	0	FALSE
DLGAP4-AS1	4		0.000907147	0	0.361239	1	1		0.256716		0	0	1.89008	1	0	0	0.883994	1	0.45715	0.238727	0.109574	0	FALSE
DLD	4		0.172306	0	0.245554	1	1		2.73333		0.136237	0.0471625	0.175612	0.99	0	0	0.481692	1	0.793248	0.0751995	0.0493984	0	FALSE
DISP1	4		3.61775e-08	0	0.598578	1	1		0.0823401		0.0167668	0.224022	0.525379	0.93	0.697217		0.65148		0.254711	0.183984	0.118864	0	FALSE
CENPM	2		0.17154	0	0.37546	1	0	0	1.45899	1	0.000156145	0.0471625	1.23868	0.99	1		0.0980704		0.589163	0.341243	0.0463759	0	FALSE
CALD1	4		0	0	0.592547	1	8.46257e-08	0	1.01519	1	0	0	1.85914	1	0	0	0.809924	1	0.538413	0.139325	0.0982481	0	FALSE
CAMK1	4		2.84091e-06	0	0.593627	1	0	0	2.19534	1	1		0.229101		1		0.13569		0.641722	0.137297	0.065406	0	FALSE
CELF2	4		0.000737639	0	0.101401	1	1.55952e-06	0	1.98284	1	3.16694e-05	0	0.529194	1	1.05602e-05	0	0.438209	1	0.359415	0.143377	0.10893	0.338834	FALSE
CAND1	4		0	0	1.13265	1	1		0.632773		0	0	0.893535	1	1		0.337694		0.459335	0.269731	0.131016	0	FALSE
CAPG	4		0.138674	0	0.233262	1	0	0	4.0167	1	0	0	1.78587	1	1		0.167744		0.624867	0.3147	0.0322795	0	TRUE
CDKN1A	4		4.73637e-05	0	0.224367	1	1		0.00762103		0.296278		0.4495		0.67845		0.137795		0.374879	0.203759	0.0515191	0	FALSE
DDIT3	4		0.158457	0	0.185389	1	1		2.48537		1		0.0691043		1		0.426426		0.578478	0.13547	0.0976812	0	FALSE
CARS2	4		1.30127e-08	0	0.554994	1	3.82338e-07	0.0566409	1.57479	0.99	1		0.339991		0.0569694	0.386	0.651106	0.85	0.459944	0.209274	0.0882929	0	FALSE
CENPP	3		0.1273	0	0.344813	1	0	0	2.38299	1	0.521613		0.0866465		1		0.0597931		0.46051	0.155194	0.0671679	1.89599	FALSE
ARHGEF1	4		2.79492e-06	0	0.192093	1	6.99674e-05	0	1.5933	1	1.2427e-07	0	0.757196	1	1		0.203141		0.374942	0.243794	0.0956443	0	FALSE
ARL4A	4		0	0	0.860686	1	0	0	1.01331	1	0	0	0.772221	1	1		0.179015		0.527628	0.293411	0.164534	0	FALSE
ARHGEF18	2		6.58957e-11	0	0.972588	1	6.63344e-05	0	0.667689	1	0.286403	0	0.415147	1	1		0.023901		0.434077	0.196567	0.103713	0	FALSE
ACOT8	4		0.000742243	0	0.293267	1	0.0229602	0.420731	2.33313	0.14	1		0.422366		1		0.111961		0.671859	0.11154	0.0881984	0	FALSE
ACOXL	2		2.91682e-05	0	0.64411	1	0	0	2.25429	1	1		0.132813		1		0.141163		0.418444	0.101368	0.0771689	0	FALSE
COX4I1	4		0.0377844	0	0.0588766	1	1		2.80915		1		0.0129893		1		0.00469423		0.874027	0.0400164	0.0241156	0	FALSE
ACTA2	4		1.41287e-08	0	0.669071	1	1.532e-13	0	3.74824	1	0	0	2.48044	1	0.381688	0	0.491677	1	0.365037	0.321588	0.0600096	1.15266	TRUE
ACTG1	4		0.0420034	0	0.0487105	1	1		2.93068		1		0.088264		1		0.0288325		0.428415	0.0700412	0.0506806	0	FALSE
ACTN1	4		0.0030417	0	0.322878	1	4.1577e-05	0	2.43106	1	5.66998e-08	0	1.34551	1	1		0.105202		0.609341	0.24024	0.0327466	0	FALSE
ACTR3	4		0	0	0.322941	1	1		2.20586		0	0	1.36767	1	1.35812e-05	0	0.23865	1	0.664767	0.190627	0.0537098	0	FALSE
CYB561D2	4		1.63773e-10	0	0.679824	1	0	0	1.35041	1	1		0.0780211		1		0.0156573		0.441239	0.209787	0.0738861	0	FALSE
ADA2	2		8.62536e-05	0	0.750454	1	6.60404e-12	0	2.07421	1	4.0765e-12	0	1.64541	1	0.190058	0.0469097	0.257668	0.99	0.70791	0.123408	0.0659372	0	FALSE
ADAMTS2	3		0.000240477	0	0.894806	1	0	0	0.969142	1	0.125019	0	0.781031	1	1		0.188527		0.391463	0.205695	0.188984	0	FALSE
ADD3	4		0	0	0.434977	1	0	0	2.13371	1	0	0	2.18337	1	0.136403	0	0.189834	1	0.45409	0.303262	0.0734203	0	FALSE
EIF5	4		0.0130107	0	0.226861	1	1		2.31544		1		0.371418		1		0.285308		0.617638	0.202257	0.0559339	0	FALSE
EIF3A	4		2.32677e-13	0	0.525718	1	0.0179966	0.0566409	1.46423	0.99	1		0.28895		7.63814e-07	0	0.23748	1	0.572642	0.165502	0.0757821	0	FALSE
CORO1B	4		0	0	0.659212	1	0	0	2.58572	1	0	0	0.653188	1	0	0	0.312519	1	0.471726	0.121413	0.0374226	0	FALSE
CYB5D2	4		0.000723134	0	0.277671	1	0	0	1.86763	1	3.09368e-06	0	0.769044	1	1		0.0720147		0.560326	0.237269	0.0778494	0	FALSE
COPS2	4		0.221449	0	0.256335	1	0.13941	0.37737	1.9715	0.88	2.28558e-08	0	0.779631	1	1		0.0706701		0.57952	0.310698	0.0490576	0	FALSE
COPB2	4		0.0011436	0	0.168482	1	0	0.0993222	1.4883	0.98	1		0.00201638		2.14498e-08	0	0.26269	1	0.736771	0.146092	0.0483804	0	FALSE
ADTRP	2		0.000209262	0	0.612621	1	0	0	2.66151	1	0.0219192	0.0471625	0.77955	0.99	0.853704		0.287115		0.691442	0.182403	0.0787493	0	FALSE
COL4A2	3		0.126514	0	0.328113	1	1		0.421735		1.51134e-06	0.224022	0.560454	0.93	0.458897		0.254846		0.271691	0.162913	0.11279	0	FALSE
CHTF8	4		6.51861e-06	0	0.719074	1	6.20471e-13	0.0566409	1.37367	0.99	0	0	1.74345	1	0.0241754	0.0469097	0.283539	0.99	0.461663	0.293346	0.109807	0	FALSE
AFG3L1P	4		0.0308819	0	0.732226	1	0.0251513	0.814586	1.63966	0.37	1		0.241327		1		0.0364601		0.364332	0.208535	0.110321	0	FALSE
AFG3L2	4		0.000639795	0	0.419811	1	1		0.304333		1		0.00337912		1		0.107838		0.572795	0.0996539	0.0668884	0	FALSE
COL1A2	2		0.0392201	0	0.0885499	1	0	0	8.98838	1	0.0058411	0	1.29443	1	0.738698		0.371502		0.350602	0.0607006	0.0456813	6.69761	TRUE
COL14A1	2		0.00245347	0	0.256011	1	0.902651		2.10393		1		0.256377		1.13664e-14	0	0.694717	1	0.53977	0.261513	0.114138	0.0907188	FALSE
ADGRF5	3		0.000506797	0	0.350935	1	9.44455e-11	0	1.85676	1	0.0229076	0	0.293154	1	1.40091e-12	0	0.646093	1	0.366212	0.175368	0.0888871	1.04772	FALSE
COL12A1	2		4.74308e-09	0	0.492604	1	0.845411		0.756923		0.108294	0	0.351244	1	0.652407		0.134436		0.333242	0.192453	0.129279	0.697714	FALSE
ELF1	4		0	0	0.630813	1	0	0	1.8104	1	0	0	2.5943	1	0.615808		1.06836		0.372894	0.269248	0.157543	0	FALSE
ELL2	4		9.54498e-13	0	0.54123	1	0	0	2.05408	1	1		0.23557		1		0.280173		0.418798	0.180173	0.097501	0	FALSE
CTNNA1	4		0.151287	0	0.239939	1	0.000180813	0	1.50944	1	1.97614e-10	0.789002	1.06228	0.63	0.508109		0.286026		0.743634	0.106966	0.0454536	0	FALSE
EPB41L2	4		0	0	1.08156	1	0.511021		0.333421		0	0	1.3477	1	0.000225815	0	0.617658	1	0.282452	0.192071	0.150231	0	FALSE
ABCA8	2		2.61437e-06	0	0.312733	1	1.09946e-11	0	2.17221	1	0.291108		0.153664		0.662726		0.136509		0.416735	0.110843	0.0770375	0.923272	FALSE
CSNK2A1	4		0.0274801	0	0.549559	1	0.326326		1.72295		1		0.281422		1		0.0396622		0.745049	0.18114	0.0292743	0	FALSE
ENTPD1-AS1	4		0.12394	0	0.875683	1	1		0.0071034		0.00625051	0.311415	0.522728	0.89	1		0.0847634		0.160413	0.145041	0.0989903	0.00274915	FALSE
CRYL1	4		6.22742e-07	0	0.407175	1	7.00975e-14	0.202309	1.40281	0.95	3.38077e-14	0.415053	1.06739	0.84	1		0.212424		0.571634	0.282017	0.0687275	0	FALSE
ENAH	3		8.80773e-11	0	0.859	1	1		0.00895302		1		0.0716871		0.0731107	0.214202	0.367783	0.93	0.401217	0.258403	0.136825	0	FALSE
EML1	3		0.24944	0	0.178492	1	5.5543e-07	0	2.26002	1	0	0	1.18673	1	0.0198649	0.190729	0.670966	0.94	0.514663	0.136876	0.134392	0	FALSE
ABCC2	3		1.74815e-05	0	1.2309	1	1.2931e-10	0.138409	1.66303	0.97	1.45511e-05	0	1.87201	1	1		0.101308		0.419268	0.221325	0.080943	0	FALSE
ABCD4	4		0.0173573	0	0.35214	1	5.95006e-05	0.283304	1.29333	0.92	1		0.0129882		1		0.228105		0.382148	0.136575	0.117323	0	FALSE
EMG1	4		0	0	0.598378	1	1.3168e-11	0	1.17298	1	0	0	1.44734	1	1		0.0525388		0.47944	0.265691	0.0811989	0	FALSE
ACE2	3		0.00356412	0	1.25925	1	1.22538e-09	0	1.10996	1	6.05003e-05	0	1.07792	1	1.54331e-08	0	0.844884	1	0.400567	0.160113	0.14529	0	FALSE
CTSL	4		0.131398	0	0.264421	1	0	0	2.59595	1	1		0.64228		0.00059367	0	0.188204	1	0.643559	0.200777	0.079931	0.0948294	FALSE
CREM	4		3.19328e-05	0	0.42427	1	7.09825e-15	0	1.42456	1	1.24529e-08	0	0.519985	1	1		0.222521		0.445405	0.160482	0.146202	0	FALSE
ABI1	4		0	0	0.44301	1	0	0	2.05233	1	0	0	1.36127	1	0	0	0.914762	1	0.386727	0.281306	0.133351	0	FALSE
CXCL12	4		0.234162	0	0.145311	1	0	0	1.95098	1	4.16709e-09	0	0.917451	1	0	0	0.689657	1	0.352147	0.228206	0.157468	0	FALSE
ABITRAM	4		0.00166875	0	0.324611	1	0	0	2.49641	1	1		0.15352		1		0.0627139		0.655442	0.171075	0.0564419	0	FALSE
CPXM1	3		0.0138694	0	0.470433	1	1.0377e-10	0	2.71886	1	0.000226284	0.200259	0.705928	0.94	1		0.0974911		0.687843	0.0975319	0.0543896	0.595754	FALSE
CPVL	4		0	0	0.471795	1	0	0	3.87129	1	0.000169535	0.0471625	0.400867	0.99	1.97257e-09	0	0.421342	1	0.76892	0.0839951	0.0427425	0	TRUE
ABLIM1	4		0.254157	0	0.116305	1	1.66131e-10	0	3.16072	1	0.0946446	0	0.360697	1	0	0	2.83215	1	0.466375	0.180661	0.090758	0	FALSE
ACAA1	4		0	0	0.354866	1	0	0	1.86927	1	1		0.54902		1		0.722004		0.462251	0.316582	0.124283	0	FALSE
ACAD10	2		0.019012	0	0.214519	1	1		0.859462		0.298551		0.468464		1		0.383001		0.357474	0.142622	0.0920231	0	FALSE
CPNE1	4		5.45587e-14	0	0.300403	1	0	0	2.25292	1	1		0.0128192		1		0.085379		0.530029	0.237373	0.113936	0	FALSE
ACAP1	3		0	0	1.62496	1	0	0	1.41154	1	0.0407897	0.224022	1.08212	0.93	0.0526524	0.764717	0.305105	0.64	0.574607	0.10927	0.0873123	0	FALSE
ABHD11	4		0.000204675	0	1.12806	1	0.0813835	0.499587	1.98635	0.82	6.79438e-07	0	1.59073	1	1		0.173418		0.584025	0.238926	0.0767035	0	FALSE
AHNAK	4		0.000555297	0	0.342606	1	0	0	2.50183	1	2.0502e-05	0.0471625	0.372667	0.99	1		0.173758		0.575431	0.232043	0.0858307	1.25091	FALSE
CCSER2	4		0.00703413	0	0.275969	1	6.84148e-06	0.37737	1.70477	0.88	8.21791e-06	0	0.537075	1	0.296125	0.52007	0.112255	0.78	0.526097	0.233658	0.047102	0	FALSE
ANAPC4	4		0.000220441	0	0.431513	1	0.300677		1.79739		1		0.271734		1		0.155965		0.566229	0.127603	0.0529459	0	FALSE
ANK3	2		4.38863e-07	0	0.700081	1	0.0107083	0	0.986567	1	9.91354e-15	0	0.579138	1	1.10099e-07	0	0.412264	1	0.316559	0.177662	0.133888	0	FALSE
ANKRD10	4		0.00971133	0	0.262056	1	3.3181e-09	0.170763	1.18567	0.96	1		0.880794		0.000595929	0	0.242737	1	0.395329	0.202857	0.0968547	0	FALSE
EAPP	4		6.09807e-13	0	0.182486	1	0.029439	0.170763	2.17875	0.96	0	0	0.56112	1	9.17859e-06	0	0.176568	1	0.758669	0.132506	0.0696045	0	FALSE
ARFIP1	4		2.82081e-05	0	0.528336	1	0	0	2.11705	1	2.11941e-11	0	1.68866	1	0.083888	0.114816	0.338354	0.97	0.4627	0.224558	0.0962419	0	FALSE
CLEC4E	3		0.245429	0	0.554015	1	3.23198e-10	0	2.01315	1	1		0.261352		1		0.224095		0.448984	0.213249	0.10206	0.0396046	FALSE
CYP20A1	4		0.101588	0	0.242425	1	0.00227039	0.283304	2.06089	0.92	0.00257808	0	0.509224	1	1		0.0244021		0.444337	0.179846	0.140474	0	FALSE
ANKRD20A2	3		4.89446e-09	0	2.17457	1	9.2032e-09	0	1.99881	1	1		0.3264		1		0.218295		0.672548	0.278147	0.0493054	0	FALSE
CLIC3	4		0.0140863	0	0.3682	1	2.99696e-09	0	1.79868	1	9.77006e-10	0	0.680586	1	1		0.202087		0.732866	0.12421	0.111794	0	FALSE
ARAP3	3		7.15061e-05	0	1.69012	1	9.42591e-07	0	1.4374	1	0.00274882	0	1.76065	1	0.925556		0.481923		0.478888	0.213759	0.115539	0	FALSE
CLK1	4		9.69486e-15	0	0.151201	1	0	0	3.31461	1	0	0	2.01383	1	0.0047294	0	0.187264	1	0.462986	0.376647	0.0659103	0	FALSE
AK1	4		0	0	1.35507	1	0	0	3.14742	1	0	0	5.95206	1	0.656314		0.43169		0.69855	0.177683	0.0361751	0	FALSE
CMC1	4		0	0	0.627609	1	0	0	2.0844	1	0	0	1.38983	1	1.13664e-14	0	0.477043	1	0.381865	0.21676	0.11637	0	FALSE
ANO7	4		0.0344073	0	0.23701	1	0.539021		1.30865		0.00367742	0	0.211044	1	0.0231427	0	0.172773	1	0.478394	0.124435	0.118167	0	FALSE
CLMP	3		5.82097e-06	0	1.6595	1	1.81148e-05	0.0993222	0.785702	0.98	0.000643345	0	1.64316	1	1		0.0565031		0.472298	0.145947	0.109472	0.0647505	FALSE
AP1B1	4		0.000106944	0	0.460093	1	0.00745368	0.551695	1.22389	0.79	0.000271695	0.0853416	0.636973	0.98	0.120836	0.114816	0.362528	0.97	0.424878	0.227046	0.176659	0	FALSE
AP2M1	4		0.0229194	0	0.109112	1	0	0	2.48796	1	0.0815027	0	0.426375	1	1		0.13208		0.465876	0.391746	0.0306372	0	FALSE
APEX1	4		0.261604	0	0.149254	1	0	0	2.57736	1	0.26171	0	0.166127	1	1		0.0416866		0.687407	0.173515	0.0593682	0	FALSE
APLP2	4		0.236255	0	0.159979	1	0	0	3.67699	1	1		0.0171349		1		0.446393		0.538453	0.26547	0.0909099	0	TRUE
APOBEC3G	4		6.77904e-07	0	0.91365	1	1.91087e-14	0	2.46007	1	3.87956e-06	0.174218	0.791759	0.95	1		0.497092		0.562765	0.187615	0.141233	0	FALSE
ARAP1	4		0.0377844	0	0.23307	1	0	0	2.64359	1	1		0.516907		1		0.179067		0.564971	0.164729	0.0513894	0	FALSE
EBF1	4		0.0124397	0	0.260906	1	0	0	4.51316	1	1		0.210569		1		0.303879		0.626307	0.1022	0.0512326	0.350554	TRUE
DYNLRB1	4		0.00609289	0	0.292798	1	1		2.3729		1		0.39941		1		0.10568		0.733318	0.170636	0.0522019	0	FALSE
ANAPC16	4		0.000200016	0	0.409915	1	7.10783e-10	0	1.44323	1	5.20451e-07	0.0853416	0.600658	0.98	0	0	0.235112	1	0.436492	0.325623	0.0967522	0	FALSE
DAZAP2	4		8.46436e-07	0	0.271079	1	0	0	2.28994	1	0	0	0.827078	1	0	0	0.303553	1	0.519103	0.163768	0.0659624	1.30818	FALSE
AKAP12	3		4.14824e-07	0	0.260218	1	0	0	1.68071	1	0	0	0.939218	1	1		0.0961521		0.50151	0.170146	0.0948114	0	FALSE
ARHGAP6	4		7.43788e-05	0	0.617379	1	0.436105		0.826202		1.33694e-13	0	1.0494	1	1		0.0840811		0.384108	0.256354	0.171225	0.323524	FALSE
AKAP13	4		0.00118618	0	0.113055	1	0	0	1.45871	1	3.71399e-07	0	0.599974	1	0	0	0.900394	1	0.235817	0.13582	0.0935481	0	FALSE
COA1	4		0	0	0.331793	1	0	0	2.44146	1	1		0.0385249		1		0.0955991		0.465636	0.137322	0.0873638	0.962586	FALSE
ALDH2	4		0.0171665	0	0.191642	1	0	0	5.43035	1	0.000464824	0	0.434665	1	0	0	0.58882	1	0.811091	0.050281	0.0239309	0	TRUE
ARHGAP15	2		0.000840401	0	0.437506	1	0	0	3.78032	1	0	0	1.9192	1	1		0.0603277		0.718573	0.093165	0.0463981	1.01307	TRUE
CMTM7	4		0.136051	0	0.673488	1	0.000342882	0.0993222	2.69689	0.98	1		0.340455		1		0.205231		0.703408	0.162413	0.0589706	0	FALSE
EEA1	4		1.05817e-10	0	0.887871	1	0.000404336	0	1.25568	1	0	0	0.944597	1	3.65795e-06	0.214202	0.713511	0.93	0.413282	0.173177	0.104487	0	FALSE
DUT	4		9.5285e-07	0	0.20717	1	1.25101e-13	0.202309	1.24583	0.95	0	0.0853416	1.95252	0.98	1		0.00935524		0.394568	0.289039	0.0572769	0	FALSE
EBPL	4		0	0	0.906031	1	3.43252e-12	0	1.47757	1	0.0372964	0.433895	0.383179	0.83	1		0.158187		0.517657	0.358967	0.0796231	0	FALSE
CYLD	4		0.00703413	0	0.618462	1	1.87215e-05	0.0993222	1.44605	0.98	1		0.36832		1		0.32871		0.391779	0.181775	0.124726	0	FALSE
AMFR	4		0.0333104	0	0.536956	1	1.83821e-08	0	1.81339	1	1		0.0462993		1		0.0870501		0.756398	0.106874	0.0457229	0	FALSE
ALG13	4		2.34503e-06	0	0.246732	1	0.00878191	0.0993222	1.21498	0.98	2.64991e-11	0	0.648857	1	0.549235		0.215947		0.334615	0.209562	0.0817941	0	FALSE
ALDOA	4		0.268967	0	0.0935567	1	0	0	3.87648	1	0	0	1.02142	1	1		0.442459		0.342236	0.130434	0.115612	0	TRUE
MTHFD1L	4		0.00518679	0.0466152	1.44293	0.99	0.252771		1.37153		1		0.0847848		0.297392	0.280873	0.617063	0.9	0.376264	0.171023	0.0798497	0	FALSE
CROCCP2	4		0.00509509	0.0466152	0.929923	0.99	0.32011		0.538705		0.414707		0.572488		1		0.0901975		0.399625	0.254973	0.097203	0	FALSE
MRPL18	4		2.35002e-08	0.0466152	0.384647	0.99	0	0.0566409	0.999071	0.99	0.043761	0	0.568786	1	0.277348	0	0.413211	1	0.457545	0.23084	0.107738	0.6549	FALSE
MRTFB	4		0.00309014	0.0466152	0.578467	0.99	1.36292e-07	0.0993222	1.16216	0.98	1		0.864933		0.00188815	0	0.476446	1	0.259298	0.226068	0.15473	0	FALSE
PCNT	4		8.63318e-09	0.0466152	0.816809	0.99	1		0.124244		1.21321e-09	0.0853416	0.776243	0.98	1		0.00685872		0.347597	0.193041	0.106064	0	FALSE
MRPL42	4		0.170318	0.0466152	0.129194	0.99	1		1.81919		0	0	2.00027	1	1		0.151406		0.477634	0.390195	0.0544166	0	FALSE
CSNK1G2	4		0.224457	0.0466152	0.456239	0.99	1		0.45946		1		0.399003		1		0.0499934		0.544362	0.100459	0.0898645	0	FALSE
LPIN1	4		0.216458	0.0466152	0.106417	0.99	0.954129		1.67202		0.0939617	0.394073	1.07157	0.85	1		0.0923778		0.518747	0.259174	0.0773997	0	FALSE
MORF4L2	4		1.20731e-06	0.0466152	0.222577	0.99	1		0.0418986		0	0	1.58018	1	1		0.0793785		0.433678	0.247647	0.137681	0	FALSE
OSBPL8	4		0.0750798	0.0466152	0.232054	0.99	0.000480402	0.829802	1.60443	0.62	1		0.708769		9.45547e-07	0	0.639438	1	0.369205	0.231565	0.146626	0	FALSE
NCAM2	2		0.0177554	0.0466152	0.490389	0.99	0.0373585	0.283304	0.942079	0.92	0.607562		0.395587		1		0.0729316		0.382367	0.254356	0.107859	0.709776	FALSE
CHEK2	3		0.000688033	0.0466152	0.306147	0.99	8.59234e-06	0.399314	2.6543	0.87	0.950395		0.29678		0	0	1.42528	1	0.485721	0.18675	0.135064	0	FALSE
MID2	2		0.0872322	0.0466152	1.02567	0.99	1		0.965707		1		0.0502145		1		5.25906e-17		0.867199	0.132801	2.65453e-33	0	FALSE
METTL25	4		0.00301074	0.0466152	0.435733	0.99	1		1.34746		0.0282429	0.0471625	0.47861	0.99	1		0.0848103		0.416453	0.185007	0.0790325	0	FALSE
NCAPG2	2		0.000907877	0.0466152	0.616934	0.99	0.000107319	0.0993222	1.75149	0.98	0.00778738	0.0471625	0.381567	0.99	1		0.0336368		0.48787	0.177396	0.118823	0	FALSE
NBPF1	4		0.00238338	0.0466152	0.321184	0.99	0	0.0566409	1.39682	0.99	1		0.136766		1		0.217964		0.421252	0.215394	0.111612	0	FALSE
NAT10	4		7.866e-05	0.0466152	0.482412	0.99	0.00132956	0.37737	2.13185	0.88	0.000106527	0.117771	0.875398	0.97	1		0.136109		0.687329	0.12742	0.0531211	0	FALSE
NDUFAF1	4		0.269813	0.0466152	0.362571	0.99	1		2.13345		0.0016791	0	0.353814	1	0.000710613	0.083524	0.687469	0.98	0.646414	0.168505	0.155596	0	FALSE
MFAP1	4		2.55395e-07	0.0466152	0.473779	0.99	1		1.45131		1		0.334282		1.38393e-11	0.0469097	0.253045	0.99	0.693941	0.145008	0.0711504	0	FALSE
MAPKAPK5	4		0.0184688	0.0466152	0.206357	0.99	0.0118066	0.90091	2.74975	0.57	0.398785		0.893035		0.211179	0.502142	0.389176	0.79	0.491643	0.120407	0.087178	0	FALSE
NFRKB	4		0.0541281	0.0466152	0.306741	0.99	1		0.143041		4.75572e-12	0	1.37912	1	1		0.704773		0.450696	0.192447	0.118699	0	FALSE
CMPK2	2		0.014677	0.0466152	0.536524	0.99	7.38068e-09	0	1.83985	1	1		0.517496		0.297812	0.0469097	0.298831	0.99	0.497076	0.212347	0.171966	0	FALSE
MALT1	3		0.0240048	0.0466152	0.367473	0.99	0.00327934	0.37737	1.39979	0.88	3.08339e-10	0	1.62578	1	1		0.0897818		0.419423	0.23672	0.0927734	0	FALSE
N6AMT1	4		0.00679364	0.0466152	0.932092	0.99	1.25727e-10	0.138409	1.43102	0.97	1		0.125973		1		0.326923		0.394626	0.216964	0.123892	0	FALSE
MAD1L1	4		0.0457707	0.0466152	0.305945	0.99	4.94633e-13	0	2.57097	1	0	0	2.01764	1	2.15154e-05	0	0.597932	1	0.543511	0.175107	0.0895619	1.58091	FALSE
NOL11	4		0.224457	0.0466152	0.175166	0.99	0.561536		2.25641		1		0.18644		1		0.222642		0.737186	0.10298	0.0535182	0	FALSE
CEMIP2	4		0.0483628	0.0466152	0.721126	0.99	0.0047864	0.0566409	0.816783	0.99	0	0	0.623507	1	1		0.302165		0.251626	0.14749	0.126177	0	FALSE
MYLK-AS1	4		0.168215	0.0466152	1.55287	0.99	0.767059		0.905183		1		0.104091		1		0.374148		0.260289	0.257094	0.200111	0	FALSE
NPLOC4	4		0.00034199	0.0466152	0.508887	0.99	1		1.18796		0.0457148	0.247568	0.683211	0.92	1		0.351162		0.462866	0.24805	0.0973373	0	FALSE
NR1D2	3		8.00802e-07	0.0466152	1.17153	0.99	0.000732295	0.957583	2.17684	0.47	0.00136084	0.117771	0.842846	0.97	1		0.0369047		0.729691	0.177903	0.0365301	1.34092	FALSE
MTUS1	4		0.0578059	0.0466152	0.170655	0.99	7.15669e-13	0	2.79954	1	0	0	0.853175	1	1		0.0690499		0.537836	0.136662	0.0671487	0	FALSE
NRN1	2		0.00405738	0.0466152	0.655326	0.99	0.000808874	0	1.00892	1	1		0.153275		1		0.0993055		0.632894	0.105632	0.0837822	0	FALSE
OGA	4		0.173275	0.0466152	0.261325	0.99	0.302643		1.61916		1		0.427705		0.0612544	0.214202	0.450423	0.93	0.412052	0.150203	0.138261	0	FALSE
MTRR	4		0.0313668	0.0466152	0.338682	0.99	0.00288703	0.983416	1.54022	0.49	1		0.0492636		1		0.0638604		0.538212	0.137725	0.079852	0	FALSE
LRR1	4		6.31676e-09	0.0466152	0.626003	0.99	1.26761e-07	0.845	1.93428	0.61	1		0.766501		1		0.176433		0.673009	0.196465	0.0861348	0	FALSE
NDUFS1	4		0.0625769	0.0466152	0.144941	0.99	7.88686e-06	0.0993222	2.90236	0.98	1		0.0440536		1		0.0100658		0.705449	0.11069	0.0522402	0	FALSE
C1QTNF7	2		0.000111861	0.0466152	0.632619	0.99	1.17177e-08	0.0566409	1.81691	0.99	1		0.0431517		1		0.131528		0.708142	0.164663	0.0870464	2.08016	FALSE
PER3	2		0.000155636	0.0466152	0.873759	0.99	1		0.218423		0.329708		0.21808		1		0.101828		0.289781	0.118398	0.10087	0.0291235	FALSE
AK2	4		0.205713	0.0466152	0.160908	0.99	1		2.27976		0	0.14656	0.859089	0.96	1		0.158868		0.76172	0.118322	0.0857734	0	FALSE
UBAC1	4		0.00020423	0.0466152	0.622877	0.99	0.000359318	0.829802	1.73278	0.62	1		0.138166		0.842909		0.117439		0.750539	0.0865872	0.0476637	0	FALSE
ALDH1A3	2		0.0557188	0.0466152	0.320018	0.99	0.612483		1.72263		1		0.197724		1		0.335138		0.567813	0.214322	0.0948279	1.75468	FALSE
TTC19	4		0.00273783	0.0466152	0.3205	0.99	1		0.550139		4.78373e-05	0	0.409708	1	1		0.0245571		0.502947	0.294246	0.114556	0	FALSE
TRPC1	2		0.00214957	0.0466152	1.38719	0.99	0.33288		0.830786		1		0.207762		1		0.224173		0.579954	0.116826	0.100734	0.667974	FALSE
TRIM29	2		0.165469	0.0466152	0.756616	0.99	1.25542e-07	0	2.39695	1	0.000641916	0.0471625	0.754582	0.99	0.116913	0.280873	0.481156	0.9	0.756104	0.0838911	0.0727814	1.17628	FALSE
TNS3	2		0.0134872	0.0466152	0.549721	0.99	0.128046	0.440598	0.621262	0.85	1		0.0421199		1		0.00879836		0.384841	0.231453	0.0829907	0	FALSE
TMEM63A	4		0.057177	0.0466152	0.722374	0.99	0.392143		0.792686		1		0.0551439		1		0.0878714		0.455037	0.101906	0.0854292	0.116718	FALSE
APRT	4		0.0350881	0.0466152	0.166943	0.99	4.60471e-06	0	2.30741	1	2.71401e-11	0	0.812552	1	1		0.0669853		0.634328	0.305652	0.0358295	0	FALSE
TCIRG1	4		2.51747e-07	0.0466152	0.273819	0.99	1.56459e-07	0.571447	2.40127	0.78	1		0.269134		0.50706		0.17048		0.524935	0.156679	0.0664509	0	FALSE
TCF7L2	4		0.00953495	0.0466152	0.403446	0.99	3.00502e-06	0.0566409	1.81895	0.99	4.70378e-09	0	0.916633	1	1		0.347756		0.255367	0.170559	0.104707	0	FALSE
TBC1D17	4		0.0717671	0.0466152	0.410303	0.99	7.51755e-07	0.0993222	2.19474	0.98	0.94544		0.345623		0.00748405	0.0469097	0.336035	0.99	0.588006	0.165346	0.0727816	0	FALSE
TASOR2	4		8.09929e-05	0.0466152	0.543292	0.99	0	0	1.30626	1	1		0.0376122		1		0.0218526		0.311667	0.197305	0.0877651	0	FALSE
TAF10	4		0.197618	0.0466152	0.201174	0.99	0.000403589	0	0.733272	1	1		0.0394574		1		0.310439		0.368383	0.221541	0.134788	0	FALSE
SYTL2	3		0.0253146	0.0466152	0.337936	0.99	3.82174e-05	0	0.588539	1	0.011442	0.544862	0.900165	0.77	1.2335e-07	0	1.31703	1	0.292628	0.189445	0.122597	0	FALSE
ARHGAP17	4		0.163105	0.0466152	0.243936	0.99	8.73728e-08	0	1.22723	1	0.297255		0.442673		1		0.215315		0.383325	0.234265	0.170521	0.580845	FALSE
SUOX	3		8.62536e-05	0.0466152	0.622778	0.99	0.0621906	0.499587	1.10709	0.82	1		0.58417		0.00026639	0	0.884736	1	0.563832	0.234499	0.113632	0	FALSE
STAG1	4		0.0768689	0.0466152	0.339598	0.99	1		1.23575		0.215453	0.117771	0.257358	0.97	0.714919		0.515061		0.367969	0.144401	0.107763	0	FALSE
ST6GAL1	3		0.213842	0.0466152	0.393397	0.99	1		1.49281		8.9542e-08	0	1.31153	1	1		0.252806		0.491662	0.17074	0.0928706	0	FALSE
SPRYD3	4		0.000271005	0.0466152	0.392495	0.99	0	0	3.33213	1	1		0.12404		0	0	0.624684	1	0.596518	0.0805377	0.0562648	0	FALSE
SPATA13	4		7.87204e-05	0.0466152	0.482953	0.99	3.91341e-07	0	0.911295	1	1		0.338004		0.000120376	0	0.435207	1	0.35731	0.267373	0.125143	0	FALSE
USP24	4		0.00030484	0.0466152	0.536528	0.99	0.181121		0.79138		1		0.0788057		1		0.059712		0.475555	0.146328	0.108934	0	FALSE
USP25	4		0.197021	0.0466152	0.290687	0.99	0.285749		0.705163		1		0.039535		1		0.0495842		0.38747	0.16411	0.103012	0	FALSE
USP7	4		0.0118083	0.0466152	0.324571	0.99	0.142497	0	0.877323	1	1		0.325128		1		0.0574689		0.410401	0.255149	0.157655	0	FALSE
AFF1	4		1.32334e-06	0.0466152	0.258122	0.99	0.0453017	0.771726	0.876616	0.66	6.61285e-12	0	0.849913	1	1		0.0656595		0.257763	0.201143	0.131853	0	FALSE
unknown_chr5_57200000	2		0.0317731	0.0466152	0.497044	0.99	0.398547		0.540525		1		0.0806574		0.452714		0.29459		0.471773	0.326112	0.121564	0	FALSE
unknown_chr2_101200000	2		0.0049166	0.0466152	0.70247	0.99	1		0.109658		1		0.086577		1		0.00422439		0.355801	0.236512	0.172295	0	FALSE
unknown_chr20_62300000	4		0.00164872	0.0466152	0.572542	0.99	1		0.162187		0.0654374	0	0.488522	1	1		0.185044		0.567404	0.19814	0.109148	0	FALSE
unknown_chr1_16600000	4		0.0242605	0.0466152	0.412963	0.99	3.10703e-06	0.333886	1.48346	0.9	1.5395e-09	0	0.886665	1	0.0460738	0.40366	0.207865	0.84	0.418439	0.296939	0.0624294	0	FALSE
unknown_chr14_GL000194v1_random_100000	4		2.54186e-05	0.0466152	0.994513	0.99	0.00486044	0.0566409	0.823158	0.99	1		0.96218		0.544949		0.118407		0.496554	0.427411	0.0760354	0	FALSE
unknown_chr14_105400000	3		0.000127096	0.0466152	1.0204	0.99	1		0.100863		0.147439	0.117771	0.367919	0.97	1		0.394291		0.454949	0.173119	0.140567	0	FALSE
ZYG11B	3		0.000801712	0.0466152	0.659736	0.99	1.55833e-06	0.230835	2.15753	0.94	1		0.283823		1		0.133351		0.655856	0.104967	0.0842876	0.555707	FALSE
ZP3	2		0.0369305	0.0466152	1.26804	0.99	3.77185e-06	0.0566409	1.99991	0.99	1		0.244891		1		0.0786327		0.66394	0.21006	0.0648815	2.22045e-16	FALSE
ZNF740	2		0.00169503	0.0466152	1.05839	0.99	0.245734		0.430317		2.85675e-12	0	2.8556	1	0.825668		0.157682		0.44982	0.22856	0.0831547	0	FALSE
ZNF577	4		0.0149405	0.0466152	0.375496	0.99	0	0	2.13757	1	0.072523	0.451864	0.915375	0.82	1		0.289927		0.547471	0.205282	0.100053	0.461041	FALSE
ARRDC1	4		7.52555e-06	0.0466152	0.366371	0.99	0	0	3.05208	1	1		0.143183		0.193081	0.214202	0.225157	0.93	0.780854	0.10291	0.0271401	0	FALSE
ZNF575	2		0.000239462	0.0466152	0.840625	0.99	1		0.422912		1		0.702811		1		0.132618		0.660578	0.270041	0.0461891	1.37781	FALSE
ZNF384	3		0.0359506	0.0466152	0.34809	0.99	0.00104893	0.0993222	0.988282	0.98	0.378269		0.780832		1		0.00879287		0.351287	0.241086	0.174906	0	FALSE
ZMYM4	4		0.0035154	0.0466152	0.597983	0.99	1		0.0353945		0.000872053	0.394073	0.767685	0.85	0.0648006	0.141281	0.323408	0.96	0.506311	0.119183	0.0974036	0	FALSE
ZHX2	3		4.78269e-09	0.0466152	0.824435	0.99	1		0.124168		3.65691e-08	0.0853416	0.750353	0.98	0.201389	0	0.277681	1	0.38624	0.235392	0.161968	0	FALSE
ZDHHC16	4		0.0145147	0.0466152	0.415908	0.99	2.82794e-05	0.170763	2.72044	0.96	1		0.425956		1		0.432462		0.547932	0.176375	0.0928111	0.947219	FALSE
ADAM15	4		0.0100513	0.0466152	0.72938	0.99	0.0146673	0	0.630621	1	1		0.623559		1		0.101368		0.358987	0.260632	0.104158	0	FALSE
XPO4	4		4.11323e-09	0.0466152	1.04047	0.99	2.35566e-07	0.551695	2.27434	0.79	1		0.333213		1		0.0485352		0.561391	0.142638	0.0841197	0	FALSE
ADIRF	4		0.0833667	0.0466152	0.167331	0.99	0	0	1.58336	1	1		0.409358		1		0.275743		0.766358	0.169876	0.0530445	0	FALSE
WDR45B	4		0.0715824	0.0466152	0.368683	0.99	0	0	2.25449	1	1		0.0287062		1		0.0322707		0.742228	0.0905596	0.0652605	0	FALSE
WDR1	4		0.00010586	0.0466152	0.102396	0.99	0.163189		3.82656		0.235419	0.966094	0.357925	0.48	1		0.140509		0.70393	0.0727358	0.0557515	0	FALSE
ADSS2	4		0.000857442	0.0466152	0.260367	0.99	0	0.0566409	2.36642	0.99	1		0.0514814		1		0.0593708		0.792579	0.0748389	0.0327147	0	FALSE
ZNF558	2		0.0358594	0.0466152	0.598909	0.99	1		0.273159		0.294162		0.606687		0.83006		0.380919		0.385606	0.244556	0.132293	0.587422	FALSE
SORL1	2		1.01132e-09	0.0466152	0.708244	0.99	1		0.881422		0.675385		0.44245		1		0.199857		0.346572	0.14347	0.136362	0.0305839	FALSE
SNX27	4		0.0960724	0.0466152	0.309605	0.99	0.0719225	0.970597	1.07418	0.48	0.000604913	0.332867	0.768395	0.88	1		0.507603		0.557648	0.149333	0.1096	0	FALSE
SLC50A1	4		1.66395e-05	0.0466152	0.20117	0.99	2.20817e-13	0.551695	2.09325	0.79	1		0.0897274		1		0.194031		0.530956	0.207977	0.0917594	0	FALSE
CALML4	4		5.43054e-05	0.0466152	0.864173	0.99	1.98543e-07	0	1.49141	1	9.76943e-09	0	0.702734	1	1		0.0802361		0.519225	0.187374	0.129866	0	FALSE
QARS1	4		0.0252023	0.0466152	0.133791	0.99	0.00312217	0.0993222	1.55609	0.98	2.39126e-06	0.269412	0.857759	0.91	1		0.0558823		0.705317	0.115062	0.0514586	0	FALSE
PTPN4	4		0.00333694	0.0466152	0.349181	0.99	0.0927921	0.461891	1.04625	0.84	0.00163286	0.0471625	0.61944	0.99	0.00784307	0	0.495487	1	0.355696	0.262644	0.0957368	0	FALSE
CANX	4		0.119333	0.0466152	0.0714525	0.99	0	0	2.08456	1	1		0.0149617		0.0392383	0.141281	0.215441	0.96	0.659854	0.154412	0.054044	0	FALSE
PSME3IP1	4		0.000563644	0.0466152	0.258941	0.99	0	0.170763	1.2137	0.96	1		0.152119		0.00174495	0.345049	0.378366	0.87	0.394248	0.139366	0.0873935	0	FALSE
PRORP	4		0.00188567	0.0466152	0.392134	0.99	2.14282e-07	0.0566409	2.02338	0.99	0.544749		0.228844		1		0.139385		0.548007	0.187637	0.107	0	FALSE
PRKCE	4		5.70732e-06	0.0466152	0.567881	0.99	0.0324557	0.399314	1.857	0.87	1.51942e-06	0	1.18021	1	7.43132e-09	0	0.945791	1	0.352995	0.217118	0.112342	0.387437	FALSE
PPP3CB	4		1.6134e-05	0.0466152	0.824275	0.99	0.000595153	0.0993222	1.03453	0.98	1		0.307393		1		0.438637		0.453156	0.262224	0.130887	0.429588	FALSE
EPB41L3	4		9.07296e-05	0.0466152	0.604885	0.99	0.152312		0.915069		0.471375		0.285253		1		0.137039		0.38575	0.218965	0.106458	0	FALSE
CAST	4		0.110849	0.0466152	0.159386	0.99	0	0	2.00363	1	0	0	1.01718	1	6.72435e-10	0	0.609102	1	0.308086	0.162617	0.128457	0	FALSE
CACNA2D2	2		3.09544e-07	0.0466152	1.00582	0.99	1.13121e-07	0	1.29301	1	1		0.0372492		3.7779e-08	0	0.46419	1	0.364438	0.138286	0.132802	0	FALSE
PPFIBP2	3		0.0200485	0.0466152	0.241682	0.99	0.000179056	0.0566409	1.27551	0.99	1		0.292426		1		0.201796		0.473154	0.112936	0.0761493	1.02935	FALSE
PNKP	4		0.0632521	0.0466152	1.1419	0.99	6.97724e-07	0.672868	2.18533	0.72	1		0.129473		0.851314		0.605965		0.642063	0.143131	0.0900237	0	FALSE
PNISR	4		0.189726	0.0466152	0.11658	0.99	3.91803e-14	0	1.73064	1	0	0	1.03811	1	0.170639	0.364783	0.176324	0.86	0.472897	0.229659	0.105853	0	FALSE
PML	4		1.96412e-07	0.0466152	0.667279	0.99	0.0137614	0.514929	0.732638	0.81	0.000206885	0.14656	0.925985	0.96	0.106989	0.114816	0.592029	0.97	0.415824	0.286302	0.161879	0.150648	FALSE
PLD2	4		0.250053	0.0466152	0.275759	0.99	0.992034		1.55528		0.243636	0.247568	0.590017	0.92	1		0.0337358		0.581472	0.149724	0.0864409	0	FALSE
PKHD1L1	2		0.280411	0.0466152	0.584778	0.99	1		0.63649		0.00574933	0	0.957147	1	1		0.190872		0.485375	0.217791	0.116468	0	FALSE
PINLYP	3		0.0292855	0.0466152	0.829832	0.99	0.0155042	0.333886	0.714453	0.9	0.248191	0.722774	0.330924	0.33	1		4.93692e-17		0.601101	0.398899	4.43122e-33	0.48411	FALSE
CCL20	2		0.101844	0.0466152	0.324034	0.99	0.166739		2.04825		0.0245145	0.174218	0.478202	0.95	1		0.130117		0.727451	0.159389	0.0628912	0	FALSE
PHTF2	4		0.0502638	0.0466152	0.356765	0.99	6.95878e-05	0.399314	2.3206	0.87	2.11087e-05	0	0.421036	1	1		0.207247		0.621937	0.128327	0.0606765	0	FALSE
PHLPP1	3		0.123139	0.0466152	0.48744	0.99	0.667225		1.05527		1		0.223501		1		0.408076		0.508614	0.153164	0.109336	0	FALSE
PEX7	3		0.170751	0.0466152	0.263221	0.99	2.85597e-09	0.283304	3.34809	0.92	1		0.202255		1		0.0983455		0.699013	0.0838628	0.0744662	0	FALSE
CBL	3		0.0003158	0.0466152	1.72662	0.99	0.00285112	0.170763	1.66126	0.96	0.0910842	0.14656	0.427761	0.96	1		0.0445678		0.552848	0.245367	0.0777776	0.888526	FALSE
PDE7A	3		0.00247767	0.0466152	0.706255	0.99	0.00411313	0.283304	1.43747	0.92	0.162141	0	0.284292	1	0.0240134	0.592844	0.539655	0.74	0.413519	0.140797	0.120655	0	FALSE
RBM12	4		4.45333e-06	0.0466152	0.556212	0.99	3.19123e-09	0.0993222	0.828237	0.98	1		0.0546495		0.0205269	0	0.28319	1	0.489312	0.258633	0.169514	0	FALSE
RETREG1	3		2.6313e-05	0.0466152	0.331457	0.99	0	0	4.58914	1	0	0	1.45893	1	1		0.055413		0.515306	0.217754	0.069632	0	TRUE
SLC29A1	4		0.208704	0.0466152	0.131193	0.99	0	0.333886	3.3281	0.9	0.116658	0.394073	0.55494	0.85	1		0.358572		0.573921	0.141467	0.0732587	0	FALSE
SLC20A2	4		0.0180707	0.0466152	0.427295	0.99	0.543924		0.444896		1		0.198907		1		0.142523		0.324677	0.177153	0.138103	0.157874	FALSE
SLC12A2	4		0.0383459	0.0466152	0.638452	0.99	0.0341714	0.202309	1.15509	0.95	0.987465		0.287094		0.00435512	0.0469097	0.553315	0.99	0.418054	0.17384	0.105381	0	FALSE
SH3GLB1	4		7.33264e-07	0.0466152	0.490905	0.99	0.00908902	0.230835	2.51882	0.94	5.54217e-13	0	0.523615	1	1		0.0320066		0.751431	0.127051	0.0376269	0	FALSE
B3GNTL1	3		0.118068	0.0466152	0.258226	0.99	1		1.31905		0.0416607	0.290486	0.493682	0.9	1		0.137736		0.560621	0.200645	0.108455	0	FALSE
SGCD	3		0.025113	0.0466152	0.707665	0.99	1.82871e-15	0	1.97564	1	1		0.301819		0.058483	0	1.22934	1	0.528257	0.18669	0.0662161	0	FALSE
SDHAP3	3		0.00623212	0.0466152	0.662171	0.99	1.80843e-05	0.230835	1.6175	0.94	1		0.061332		1		0.013566		0.656469	0.115261	0.0870666	1.12757	FALSE
SCAF1	4		0.0927951	0.0466152	0.363761	0.99	1		0.199183		2.38476e-05	0.269412	1.52348	0.91	0.00307742	0.141281	0.439072	0.96	0.499081	0.210992	0.0848381	0	FALSE
SASH1	4		0.155858	0.0466152	0.491341	0.99	0	0	1.61002	1	1		0.175068		0.000338103	0	0.88843	1	0.37527	0.241591	0.118906	0.00698653	FALSE
RTN4IP1	3		1.53296e-12	0.0466152	0.801143	0.99	0	0	2.15695	1	1		0.125431		7.48883e-10	0.083524	0.718092	0.98	0.554147	0.138285	0.0697637	0.0905466	FALSE
RCOR3	4		0.0011207	0.0466152	0.423721	0.99	0.0693708	0.571447	1.93165	0.78	0.00146389	0	0.67245	1	0.0341624	0.30236	0.295151	0.89	0.409989	0.160132	0.0857332	0.465851	FALSE
RPS6KA5	3		0.0152198	0.0466152	0.347775	0.99	7.90683e-05	0.202309	1.57471	0.95	1		0.276225		1		0.0238152		0.582925	0.172909	0.05603	1.51429	FALSE
BRD7	4		0.00659587	0.0466152	0.450886	0.99	1.01268e-05	0.440598	1.61998	0.85	1		0.00593632		1		0.0228601		0.501115	0.241865	0.0851104	0	FALSE
BTN2A1	4		5.10609e-07	0.0466152	0.543075	0.99	5.98613e-09	0.0566409	2.46551	0.99	1		0.416502		1		0.253108		0.546848	0.208066	0.0977377	0	FALSE
RPL23AP53	4		0.000273413	0.0466152	0.69059	0.99	2.09036e-07	0	0.800308	1	0.751127		0.797698		1		0.150282		0.389948	0.243312	0.139033	0	FALSE
C1QTNF5	3		0.00262509	0.0466152	1.3269	0.99	0.334457		0.528672		1		0.157737		1		0.105332		0.307647	0.20999	0.131997	0	FALSE
RNMT	4		4.80426e-07	0.0466152	0.453076	0.99	0	0.37737	2.10675	0.88	0.00196404	0.394073	0.821522	0.85	1		0.510277		0.628666	0.19142	0.0652751	0	FALSE
RNF125	3		0.134633	0.0466152	0.203798	0.99	3.51211e-07	0.0993222	2.16626	0.98	1		0.208839		1		0.0835214		0.478887	0.191007	0.0893331	0	FALSE
C8orf58	2		4.05653e-07	0.0466152	1.33829	0.99	2.15111e-10	0	2.28931	1	1		0.183849		1		0.247719		0.812831	0.137592	0.036147	0.00921042	FALSE
RHOC	4		0.106479	0.0466152	0.15284	0.99	1		0.0972217		0	0	1.2195	1	0.721535		0.121045		0.81625	0.106857	0.0356786	0	FALSE
RHBDF2	3		0.0299413	0.0466152	0.527068	0.99	0.00530184	0.0566409	1.13778	0.99	1		0.0625891		1		0.0197946		0.443246	0.191821	0.123365	0	FALSE
RGS12	4		0.00745183	0.0466152	0.489004	0.99	0.000161578	0.170763	1.143	0.96	1		0.391079		1		0.46225		0.378194	0.155192	0.124804	0	FALSE
BOLA3	4		0	0.0466152	1.43227	0.99	0	0.0993222	2.27156	0.98	1		0.0592804		1		0.0855618		0.98758	0.00777643	0.00440232	0	FALSE
LOC100507053	2		0.252898	0.0466152	0.222392	0.99	1		0.0101289		1		0.0442694		1		0.0210445		0.239341	0.166017	0.126298	1.21428	FALSE
unknown_chrX_53500000	2		0.0896364	0.0466152	0.837708	0.99	0.00220775	0.138409	0.763726	0.97	1		0.14244		0.47206		0.167367		0.555362	0.255376	0.189263	0	FALSE
DCAF11	4		0.00865959	0.0466152	0.384141	0.99	0.860706		0.935533		0.374966		0.847584		1		0.221318		0.402347	0.197044	0.101403	0	FALSE
GPAM	2		0.0882694	0.0466152	0.814837	0.99	1		0.463602		0.659677		0.814258		1		0.365478		0.320429	0.227287	0.175948	0	FALSE
FADS1	3		0.147293	0.0466152	0.341494	0.99	3.60739e-15	0	3.15398	1	1		0.210545		1		0.211763		0.878794	0.058526	0.0201508	0	FALSE
GORAB	4		8.34406e-06	0.0466152	0.702434	0.99	0.000227965	0.622106	1.18685	0.75	1		0.737017		1		0.0539799		0.647155	0.168111	0.0985941	0	FALSE
GOLGA8A	3		0.0268277	0.0466152	0.577848	0.99	1		0.0803211		1		0.939258		1		0.262923		0.485963	0.235618	0.160881	0	FALSE
GLT8D1	4		0.182533	0.0466152	0.127672	0.99	4.76696e-11	0.0993222	2.13053	0.98	0	0	1.56532	1	1		0.283076		0.52187	0.274297	0.0698045	0	FALSE
GGA1	4		1.57917e-07	0.0466152	1.24646	0.99	1		0.390506		6.45833e-05	0.311415	1.17874	0.89	1		0.0439626		0.559753	0.276351	0.0745736	0	FALSE
CYTH1	3		0.00732949	0.0466152	0.240293	0.99	0.192467		1.26417		0.0101708	0	0.352513	1	1		0.303591		0.511079	0.17236	0.0954534	0	FALSE
FAM204A	4		0.00215684	0.0466152	0.252532	0.99	0.655566		0.172613		6.47129e-09	0.269412	1.28651	0.91	0.960965		0.228738		0.545538	0.319345	0.041933	0	FALSE
GCNT1	2		5.36312e-07	0.0466152	1.26491	0.99	1.65624e-13	0.0566409	1.25524	0.99	1		0.0448034		1		0.0260121		0.653691	0.230451	0.0561675	2.06277	FALSE
KRT7	3		0.0974607	0.0466152	0.655338	0.99	2.5853e-14	0	3.7009	1	4.20943e-06	0	4.65884	1	0.471526		0.548155		0.645449	0.117318	0.0350588	0	TRUE
INPP1	4		0.0551667	0.0466152	0.41585	0.99	1.26147e-08	0	1.72045	1	1		0.751676		1		0.0888366		0.55922	0.180546	0.0573791	0	FALSE
FAM53C	3		0.000550437	0.0466152	1.0044	0.99	1		1.06332		0.0374993	0	0.330659	1	1		0.0680745		0.340032	0.186299	0.142512	0.310344	FALSE
DMAC2	4		2.13818e-07	0.0466152	0.614482	0.99	0.0570352	0.170763	0.773361	0.96	1		0.832421		1		0.159163		0.567052	0.269803	0.0543792	0	FALSE
FAS	4		0.0109044	0.0466152	0.223096	0.99	0.00696439	0.202309	2.71369	0.95	2.53606e-09	0	1.561	1	1		0.120027		0.527109	0.265844	0.0696196	0	FALSE
DOLPP1	2		0.158457	0.0466152	0.606785	0.99	0.000331498	0.399314	1.74326	0.87	1		0.516564		1		0.0100949		0.67728	0.193772	0.0576171	0	FALSE
FBXO25	4		8.30799e-08	0.0466152	1.10671	0.99	1		1.25519		0.000137056	0.415053	0.703893	0.84	1.28057e-09	0.141281	0.595816	0.96	0.602313	0.200824	0.116829	0	FALSE
JUNB	4		3.55877e-07	0.0466152	0.685731	0.99	0.0695928	0.0993222	0.167507	0.98	1		0.011765		1		0.00173915		0.0891018	0.0693441	0.0568009	0.0971354	FALSE
IWS1	4		1.04277e-06	0.0466152	0.775945	0.99	6.27388e-06	0.170763	1.04917	0.96	0.0112787	0.671336	0.826262	0.3	0.0172222	0.259254	0.555554	0.91	0.572922	0.123634	0.0883241	0	FALSE
HSD17B7	4		0.00848038	0.0466152	0.403563	0.99	1.56964e-14	0.0566409	1.73074	0.99	0.0251577	0.0471625	0.396363	0.99	0.267395	0.483363	0.206878	0.8	0.599538	0.135051	0.0811865	1.0531	FALSE
FHL2	3		0.0651232	0.0466152	0.172712	0.99	0	0	3.03014	1	5.86974e-08	0	0.980852	1	1		0.0193571		0.378516	0.334089	0.185505	0	FALSE
HSPA9	4		0.000570714	0.0466152	0.256178	0.99	0	0	2.6906	1	0.296725		0.352905		0.0950555	0	0.141473	1	0.695588	0.089953	0.0762122	0	FALSE
DDX58	4		0.199005	0.0466152	0.211988	0.99	8.54051e-08	0.138409	1.89834	0.97	0.312949		0.3772		1		0.229983		0.611328	0.130296	0.082293	0	FALSE
ITGA5	4		0.14172	0.0466152	0.179475	0.99	7.78975e-05	0	1.37414	1	0.805703		0.391639		1		0.219784		0.327963	0.130861	0.0908112	0.333987	FALSE
IST1	4		0.146153	0.0466152	0.109521	0.99	0.207828		2.18439		0.880119		0.194057		1		0.0611236		0.620481	0.133858	0.0821822	0	FALSE
DEPDC7	2		0.10488	0.0466152	0.635037	0.99	0.144189	0.0566409	1.3709	0.99	0.490121		0.48832		1		0.0636975		0.612096	0.37781	0.00749306	0	FALSE
ISG20	4		0.00252214	0.0466152	0.303663	0.99	1		1.22432		1		0.285368		1		0.911429		0.291876	0.226399	0.162876	0	FALSE
IRF3	4		0.234724	0.0466152	0.132502	0.99	0.183343		1.31771		0.24752	0.0853416	0.530569	0.98	1		0.231271		0.434149	0.166678	0.134631	0.448295	FALSE
DDX27	4		0.000695828	0.0466152	0.380053	0.99	1		0.450206		0	0.200259	1.06102	0.94	1		0.155983		0.639984	0.113072	0.0561952	0.026573	FALSE
FNDC3B	4		0.206108	0.0466152	0.275846	0.99	0.719603		1.18003		1		0.304681		1		0.264001		0.370064	0.168295	0.116122	0	FALSE
IPO9-AS1	4		4.71623e-11	0.0466152	1.4715	0.99	1.57405e-10	0.551695	1.4734	0.79	0.853753		0.13374		5.42882e-08	0	0.615682	1	0.576563	0.132414	0.0846436	0	FALSE
KANK1	3		0.00273574	0.0466152	0.549654	0.99	0.106886	0.622106	0.545669	0.75	1		0.0267251		1		0.0141745		0.403797	0.0912964	0.0638597	0	FALSE
LMO7	4		1.75839e-05	0.0466152	0.699213	0.99	1		0.991747		9.97598e-12	0	1.48897	1	1		0.194506		0.298664	0.176822	0.103438	0	FALSE
HNMT	3		1.28156e-09	0.0466152	0.819183	0.99	0	0	2.45198	1	0	0.290486	1.00943	0.9	0.0249054	0.0469097	0.856581	0.99	0.630675	0.152077	0.119325	0	FALSE
IL7	4		5.99576e-07	0.0466152	0.695532	0.99	0	0.138409	2.20083	0.97	0.0228792	0.200259	0.341224	0.94	1		0.0433216		0.615776	0.105424	0.0756456	0	FALSE
EPS8L2	3		0.00627457	0.0466152	0.888622	0.99	1.72568e-05	0	1.22495	1	1		0.147255		0.23399	0.083524	0.903194	0.98	0.475187	0.19082	0.117669	0	FALSE
LOC105373796	3		0.0277101	0.0830648	0.528061	0.98	0.00463184	0.604311	1.33293	0.76	1		0.168292		1		0.0120746		0.601313	0.207732	0.101607	0	FALSE
NFATC1	4		0.0226829	0.0830648	0.52211	0.98	1		0.367554		0.00153975	0	0.553857	1	1		0.0431166		0.495002	0.195553	0.0952631	0	FALSE
DDB2	4		0.0436064	0.0830648	0.287183	0.98	0	0	2.70466	1	1		0.261485		0.423491	0.141281	0.179885	0.96	0.675984	0.11349	0.0514044	0.834337	FALSE
RAD54L2	2		0.00147933	0.0830648	0.689148	0.98	0.0431398	0.138409	0.805593	0.97	1		0.389281		1		0.256631		0.2726	0.208124	0.170026	0	FALSE
TDRD7	4		0.0417498	0.0830648	0.588518	0.98	0.951116		1.1365		1		0.498421		1		0.604355		0.45419	0.185251	0.138346	0	FALSE
CADPS2	4		0.0484889	0.0830648	0.906891	0.98	0.408312		0.869615		1		0.675591		1		0.55418		0.387471	0.209085	0.098645	0	FALSE
GNL3L	4		0.00793033	0.0830648	0.580581	0.98	0.0308928	0.399314	1.00223	0.87	0.947449		0.610108		1		0.145339		0.303263	0.235587	0.0705132	0	FALSE
PIP5K1B	3		0.0620526	0.0830648	0.519904	0.98	7.99879e-05	0	0.767634	1	0.0127773	0.0853416	0.513428	0.98	1		0.10247		0.39137	0.291799	0.0749932	0.00380392	FALSE
ELN-AS1	2		0.116891	0.0830648	0.30093	0.98	1		0.537441		0.00352541	0	0.605496	1	1		0.161002		0.636333	0.313942	0.0497255	0	FALSE
DYNC1LI2	4		2.63103e-05	0.0830648	0.433722	0.98	3.61482e-08	0.604311	1.36621	0.76	4.25927e-05	0.563051	0.805507	0.76	1		0.0713598		0.710079	0.146091	0.0650974	0	FALSE
ZNF385B	2		0.0564254	0.0830648	0.33958	0.98	3.25919e-11	0	1.98184	1	1		0.148843		0.383804	0.190729	0.548702	0.94	0.420685	0.117146	0.106804	0.665813	FALSE
ZNF433-AS1	4		0.0920863	0.0830648	0.537083	0.98	0	0.0566409	1.61011	0.99	1		0.0448778		1		0.0415714		0.442306	0.199474	0.0782723	0	FALSE
HES4	3		5.49645e-11	0.0830648	0.930117	0.98	2.72186e-09	0.170763	1.84892	0.96	0.496796		0.51365		1		0.0373674		0.742025	0.138692	0.0498773	0	FALSE
SETD2	4		1.41029e-06	0.0830648	0.321868	0.98	1.11551e-06	0.138409	0.742117	0.97	1		0.0424574		1		0.0667851		0.366087	0.171195	0.102723	0	FALSE
PUS10	2		0.00101349	0.0830648	0.725666	0.98	4.61888e-06	0.170763	1.39237	0.96	1		0.529168		1		0.451269		0.427162	0.284763	0.145072	0	FALSE
AGO2	4		0.00033825	0.0830648	0.333397	0.98	4.84952e-12	0	1.6385	1	0.0238582	0	0.266477	1	1		0.307479		0.495732	0.173059	0.079609	0.946589	FALSE
ITIH4	2		0.00436994	0.0830648	0.618486	0.98	1		0.782759		0.104954	0.200259	0.487649	0.94	0.452714		0.200348		0.468575	0.219243	0.101821	0.903454	FALSE
COG5	4		0.129393	0.0830648	0.313518	0.98	1		0.920339		1		0.319401		1		0.0149432		0.571516	0.14255	0.0597515	0	FALSE
BORCS5	4		0.00177947	0.0830648	0.614855	0.98	0	0	2.13939	1	0.61067		0.81357		0.000555345	0	0.4736	1	0.606761	0.202078	0.102379	0	FALSE
HNRNPC	4		0.221452	0.0830648	0.105466	0.98	0.726427		0.89591		0.935253		0.645293		1.34835e-07	0.881533	0.432793	0.43	0.340132	0.177571	0.173626	0	FALSE
NUCB2	4		0.0101843	0.0830648	0.330187	0.98	0.00203788	0.399314	2.31819	0.87	1		0.2825		0	0	0.327105	1	0.496355	0.165352	0.114559	0	FALSE
HSF4	3		0.0257579	0.0830648	0.536669	0.98	0.183429		1.2606		0.0955488	0.580891	0.788183	0.75	0.361409	0.16679	0.285033	0.95	0.470658	0.187797	0.14477	0.525991	FALSE
LOC101929140	3		0.0344073	0.0830648	0.722977	0.98	1		0.287415		1		0.0270048		1		0.379786		0.424219	0.287594	0.134299	0.0261519	FALSE
FIGN	2		0.0648029	0.0830648	0.748573	0.98	0.000326448	0.0993222	1.93793	0.98	1		0.655783		1		0.000850052		0.607153	0.253695	0.073754	1.74945	FALSE
CDK17	4		0.0382703	0.0830648	0.22285	0.98	1		1.83326		0.896585		0.409651		1		0.0236677		0.576523	0.150828	0.0541453	0	FALSE
ITGB5	4		0.00791576	0.0830648	0.177499	0.98	0.000641954	0.0566409	1.49667	0.99	7.03551e-06	0.0853416	0.748481	0.98	1		0.0599636		0.584886	0.143811	0.0841302	0	FALSE
PTK2B	4		0.1572	0.0830648	0.239762	0.98	0.000885673	0	1.38689	1	0	0	1.43961	1	1		0.152983		0.362703	0.182139	0.144302	0	FALSE
OSBPL1A	4		0.0596101	0.0830648	0.216894	0.98	0	0	1.99029	1	0.133991	0	0.45202	1	1		0.138729		0.3721	0.194772	0.103449	0	FALSE
ZNF248	3		0.00234677	0.0830648	0.904729	0.98	1.20211e-05	0.0993222	1.92782	0.98	0.000840402	0	0.996706	1	1		0.185155		0.43846	0.258781	0.109354	0.0739725	FALSE
ABCA5	4		4.12177e-05	0.0830648	0.5134	0.98	1.41211e-08	0.170763	1.10176	0.96	1		0.175819		0.476808		0.579062		0.240643	0.206255	0.156479	0	FALSE
KCTD20	4		3.99679e-05	0.0830648	1.26438	0.98	7.9385e-07	0	2.46026	1	0.205557	0.85614	0.634475	0.59	1		0.179303		0.512963	0.212983	0.101893	0	FALSE
RBBP8	4		0.142024	0.0830648	0.268094	0.98	0.196876		1.23855		0.357726		0.688454		0	0	1.19907	1	0.322472	0.171363	0.153593	0	FALSE
C8orf44-SGK3	3		0.000631302	0.0830648	0.814203	0.98	7.52742e-07	0.138409	1.22767	0.97	1		0.857569		1		0.0627182		0.513057	0.236211	0.10037	0	FALSE
ZHX1	4		0.00125967	0.0830648	0.909998	0.98	0.0110795	0.138409	0.777547	0.97	1		0.23452		2.04101e-09	0.0469097	0.558872	0.99	0.477135	0.388269	0.122943	0	FALSE
MSTO1	3		3.64491e-06	0.0830648	0.830817	0.98	0.564842		0.546583		1		0.646273		0.0100964	0.16679	0.225784	0.95	0.398036	0.286069	0.146698	0	FALSE
DBF4	3		7.0531e-05	0.0830648	0.731488	0.98	0.399057		1.17029		0.0362077	0	0.538617	1	1		0.149294		0.498131	0.261602	0.0851691	0	FALSE
CCDC7	4		0.00133849	0.0830648	0.630829	0.98	0.374493		0.853165		0.705847		0.213855		1		0.103024		0.213046	0.13966	0.0968507	0	FALSE
DAB2	4		0.0280999	0.0830648	0.321805	0.98	0.00246407	0	1.6973	1	5.98705e-11	0.247568	0.720309	0.92	0.59038		0.245514		0.449357	0.165503	0.103073	0	FALSE
MYLK	4		0.16894	0.0830648	1.38978	0.98	8.1484e-09	0	0.8268	1	0.0062959	0.0471625	0.738022	0.99	0.0167214	0	0.629643	1	0.301706	0.180725	0.122441	0.25266	FALSE
ZFAT	2		0.0409671	0.0830648	0.809744	0.98	0.310398		1.07991		1		0.00890058		1		0.187578		0.415746	0.148605	0.110918	0	FALSE
MRPL52	4		0.0988787	0.0830648	0.126194	0.98	8.83644e-07	0.356494	1.89082	0.89	3.16522e-09	0.652856	0.740497	0.71	1		0.0540105		0.542391	0.276394	0.0729778	0	FALSE
RMND1	4		0.00228711	0.0830648	0.337315	0.98	4.92095e-13	0.25857	2.69612	0.93	1		0.0889587		1		0.0236318		0.724336	0.0832427	0.0466095	0	FALSE
MRPL1	4		0.0152198	0.0830648	0.176567	0.98	1		1.45972		0.000643345	0	0.588101	1	0.00990679	0.0469097	0.387527	0.99	0.547771	0.20172	0.119706	0	FALSE
RNASEL	3		0.000158512	0.0830648	0.841529	0.98	2.1615e-12	0.0993222	2.26333	0.98	0.150609	0.35347	0.738739	0.87	1		0.134802		0.724421	0.181341	0.0857434	0	FALSE
TATDN3	4		0.0765225	0.0830648	0.194977	0.98	0.174456		2.86569		2.79284e-06	0.0853416	1.18108	0.98	1		0.19166		0.591281	0.173731	0.0725008	0	FALSE
XPNPEP3	3		5.0729e-05	0.0830648	1.47492	0.98	8.90172e-07	0.0566409	1.35968	0.99	0.00072593	0.117771	0.597635	0.97	0.193081	0.237538	0.383705	0.92	0.434614	0.258494	0.153272	0	FALSE
GBF1	4		0.239684	0.0830648	0.25553	0.98	1		0.508618		0.00112898	0.269412	0.625183	0.91	1		0.257525		0.351173	0.190351	0.0691328	0	FALSE
RBP5	3		0.0130596	0.0830648	0.817368	0.98	1.92384e-09	0	3.05992	1	9.99358e-05	0.0471625	0.798637	0.99	1		0.308677		0.425936	0.217555	0.172235	0	FALSE
SUCO	4		0.114204	0.0830648	0.61664	0.98	1		0.436662		1		0.693612		1		0.0402432		0.3959	0.218736	0.0878824	0	FALSE
PLEKHG1	3		0.0658421	0.0830648	0.311754	0.98	1		0.44711		1		0.061001		1		0.286246		0.278624	0.157225	0.148088	0	FALSE
CLHC1	2		0.00248026	0.0830648	0.689795	0.98	1		0.199861		1		0.268245		1		0.0293232		0.228622	0.153767	0.127194	0.842802	FALSE
RBM26	4		0.022804	0.0830648	0.475439	0.98	0.50905		0.532965		1		0.10439		0.171115	0.538994	0.307148	0.77	0.295981	0.183844	0.150387	0	FALSE
STIL	2		0.211336	0.0830648	0.77139	0.98	0.046884	0.202309	0.938271	0.95	1		0.230519		0.110331	0.16679	0.550902	0.95	0.389594	0.192956	0.143795	0.436989	FALSE
ACAP2	4		0.00125464	0.0830648	0.216942	0.98	0.0935314	0	2.47658	1	1		0.265438		1		0.0270821		0.602382	0.116589	0.0770129	0	FALSE
LOC105373194	4		0.00173667	0.0830648	0.540568	0.98	1		0.184477		1		0.186495		1.02732e-06	0.259254	0.55675	0.91	0.491457	0.280476	0.120804	0	FALSE
C1orf50	4		0.0512907	0.0830648	0.268493	0.98	4.77867e-05	0.94341	1.59499	0.46	1		0.303622		1		0.217944		0.371764	0.284082	0.138698	1.08956	FALSE
YME1L1	4		0	0.0830648	1.66887	0.98	0	0	2.00688	1	0.000611193	0.117771	0.742377	0.97	0.00702871	0.0469097	0.246546	0.99	0.454377	0.215708	0.0998649	0	FALSE
TCAF1	4		2.333e-06	0.0830648	1.44262	0.98	0.00113608	0	0.794143	1	1		0.00538728		1		6.15096e-17		0.697102	0.302898	2.6898e-33	0	FALSE
ZNF227	3		0.0286051	0.0830648	0.488721	0.98	0.604453		1.11958		1		0.477595		1		0.298517		0.33491	0.258743	0.229031	0	FALSE
YBX1	4		0.0151877	0.0830648	0.15011	0.98	0	0	4.23558	1	1		0.0861339		1		0.0809666		0.745198	0.1133	0.0295008	0	TRUE
RELCH	4		0.00147168	0.0830648	0.515365	0.98	0.806468		0.490816		1		0.0392562		1		0.0403382		0.300417	0.143563	0.122666	0	FALSE
PSPC1	4		0.106121	0.0830648	0.212836	0.98	0.233648		2.12991		0.0450506	0.14656	0.443223	0.96	1		0.0540676		0.451273	0.225473	0.168213	0	FALSE
ARMCX5-GPRASP2	3		0.0293364	0.0830648	0.52247	0.98	0.0123009	0.0993222	0.827527	0.98	1		0.484921		1		0.133391		0.380155	0.230201	0.118414	0.74269	FALSE
ICE1	4		1.6701e-13	0.0830648	1.18257	0.98	0.271277		0.468442		0.00244184	0.889343	0.749874	0.43	1		0.0440018		0.435266	0.27818	0.146829	0.311342	FALSE
SLAIN1	2		0.171876	0.0830648	0.456498	0.98	1		0.137526		0.0446796	0.563051	0.799925	0.76	1		0.168466		0.539236	0.177683	0.116522	2.10962	FALSE
SLC16A4	2		0.00233786	0.0830648	0.422695	0.98	1		0.478729		1		0.714552		1		0.313651		0.581819	0.21742	0.106291	0	FALSE
unknown_chr1_155600000	3		0.243739	0.0830648	0.264089	0.98	0.00453602	0	1.25762	1	0	0	1.0434	1	0.545658		0.346559		0.341977	0.262918	0.173274	0.161148	FALSE
SNU13	4		0.0524179	0.0830648	0.199692	0.98	1		2.09533		1		0.0320119		1		0.088283		0.762854	0.193509	0.0275389	0	FALSE
SLC9A3R2	3		0.148103	0.0830648	0.316738	0.98	1		1.5177		0.000453454	0	1.69192	1	1		0.122385		0.369171	0.19742	0.104533	0.54952	FALSE
PHLDB2	4		0.000171822	0.0830648	0.525667	0.98	0.0171526	0.0993222	0.523793	0.98	0.0314991	0.247568	0.50737	0.92	1		0.154267		0.255871	0.143172	0.122401	0	FALSE
LOC728613	3		0.012226	0.0830648	0.682983	0.98	0.000624119	0.860881	0.92521	0.4	0.344438		0.169834		1		0.0816382		0.259127	0.217951	0.110654	0	FALSE
ABAT	2		0.221449	0.0830648	0.305869	0.98	0.000376707	0.399314	1.52257	0.87	1		0.221488		1		0.139831		0.590773	0.16442	0.0824834	0	FALSE
unknown_chr6_GL000254v2_alt_2600000	4		0.107849	0.0830648	0.143055	0.98	0.00125334	0.0993222	0.912002	0.98	2.62213e-05	0	0.644234	1	0.0908457	0	0.382019	1	0.366611	0.260658	0.145435	0.024621	FALSE
CPOX	2		0.00241657	0.0830648	1.04081	0.98	0.0249014	0.874233	1.55095	0.59	0.252752	0	0.689023	1	1		0.178473		0.526628	0.321798	0.0910523	0	FALSE
PLSCR1	4		0.22668	0.0830648	0.198346	0.98	0	0	2.66676	1	6.22512e-09	0	0.77171	1	4.93653e-06	0.237538	0.434695	0.92	0.56398	0.180709	0.105782	0	FALSE
PEX14	4		0.00821373	0.0830648	0.825668	0.98	0.259447		1.50573		0.0140292	0.0853416	1.12734	0.98	0.491185		0.490865		0.623264	0.160962	0.0697471	0	FALSE
SNRNP70	4		5.67456e-13	0.0830648	0.661933	0.98	1		0.458969		1		0.340234		0.439205	0.751152	0.392571	0.35	0.506546	0.227467	0.125668	0	FALSE
LOXL3	3		0.00012883	0.0830648	0.384097	0.98	0	0	2.71629	1	1		0.122304		1		0.115591		0.617602	0.155159	0.0650127	0	FALSE
SNHG17	4		0.0859634	0.0830648	0.163909	0.98	0.0651875	0.93	0.605304	0.55	1		0.924822		0.0610884	0.764717	0.632596	0.64	0.288851	0.268057	0.195722	0	FALSE
PPM1K	4		0.250662	0.0830648	0.686849	0.98	0.0129747	0.551695	2.10265	0.79	1		0.726811		0.338365	0.364783	0.165775	0.86	0.625716	0.154869	0.0887744	0	FALSE
SMARCA2	4		0.234724	0.0830648	0.150832	0.98	1		0.335429		3.75499e-06	0	0.667275	1	1		0.09976		0.226955	0.173639	0.144816	0	FALSE
GPX3	4		2.94146e-05	0.0830648	0.132365	0.98	0.017493	0	1.41466	1	0.957049		0.685227		1		1.19672		0.202347	0.0800204	0.0656035	0	FALSE
TMEM267	4		0.101623	0.0830648	0.312725	0.98	2.47857e-09	0.771726	1.94642	0.66	1		0.506697		1		0.313301		0.512503	0.209931	0.121113	0	FALSE
BCO2	2		0.00729373	0.0830648	0.741266	0.98	0.000772327	0.283304	1.34426	0.92	1		0.244636		0.791677		0.169167		0.436589	0.238725	0.0915357	0.967844	FALSE
POMT2	2		0.186447	0.0830648	0.463373	0.98	0.134052	0.499587	1.31532	0.82	1		0.317702		1		0.150978		0.440152	0.137334	0.111977	3.42717	FALSE
TMEM45A	3		0.00922697	0.0830648	0.464476	0.98	0.000102366	0.0993222	1.03006	0.98	5.47451e-08	0	2.79947	1	1		0.106554		0.509175	0.347242	0.0601333	2.22045e-16	FALSE
FRMD4A	4		0.000744456	0.0830648	0.39846	0.98	1		0.330667		1		0.0632612		1		0.0813553		0.319529	0.128046	0.109114	0.270405	FALSE
TMEM256-PLSCR3	4		0.194691	0.0830648	0.593593	0.98	0.00520532	0.0566409	1.43958	0.99	1		0.0139412		1		0.0396417		0.513292	0.157933	0.135545	0	FALSE
ANKRD54	4		0.000181239	0.0830648	0.473301	0.98	2.35554e-11	0.356494	2.30296	0.89	1		0.370858		1		0.21228		0.620303	0.144624	0.0753512	0	FALSE
SOS1	4		0.276125	0.0830648	0.210592	0.98	0.230511		0.863198		1		0.263985		0.600625		0.48521		0.442589	0.126451	0.104553	0	FALSE
PHACTR1	2		0.000472364	0.0830648	1.21024	0.98	0.187984		0.406977		1		0.0947826		1		0.452931		0.3962	0.20829	0.159316	0	FALSE
COP1	4		0.250101	0.0830648	0.242048	0.98	0.676904		1.35483		1		0.0546074		0.166643	0.0469097	0.648128	0.99	0.517156	0.149174	0.0930169	0	FALSE
SLC35B1	4		0.0555456	0.0830648	0.0962616	0.98	7.42622e-13	0	2.77286	1	1.00635e-09	0.290486	0.745799	0.9	1		0.188387		0.624346	0.202975	0.0620083	0	FALSE
MAPK10	2		0.150937	0.0830648	0.323315	0.98	0.285685		1.09589		1		0.102341		1		0.031956		0.265771	0.160292	0.11891	0.801176	FALSE
DGKZ	4		0.00858378	0.0830648	0.508071	0.98	3.97573e-05	0.138409	1.0614	0.97	1		0.229025		1		0.210107		0.373288	0.161582	0.107019	0	FALSE
PRUNE1	4		0.0447519	0.0830648	0.27384	0.98	1		1.60127		0.856043		0.244286		1		0.131732		0.399945	0.232341	0.127149	0	FALSE
SLC35G2	4		1.53365e-09	0.0830648	0.576786	0.98	1		0.0230101		0.0111259	0	0.549896	1	0.00662436	0.0469097	0.261138	0.99	0.506094	0.128931	0.123915	0	FALSE
ATR	4		0.00276313	0.0830648	0.607245	0.98	0.00699891	0.0566409	1.03054	0.99	1		0.108826		1		0.0234447		0.363461	0.245939	0.0800456	0	FALSE
MAP3K7CL	2		0.0634628	0.0830648	0.494437	0.98	0.749048		1.60401		0.0933491	0.0853416	0.598744	0.98	1		0.382801		0.372639	0.204219	0.141453	1.18455	FALSE
TTPAL	3		0.278472	0.0830648	0.264223	0.98	0.957083		2.38183		1		0.210471		1		0.116401		0.643942	0.172338	0.0633467	0.714621	FALSE
ARSK	3		1.12751e-07	0.0830648	0.847885	0.98	3.97755e-08	0.283304	1.77242	0.92	1		0.17124		0.0133671	0.928939	0.518434	0.54	0.471672	0.247296	0.129504	0	FALSE
PROS1	3		0.235692	0.0830648	0.188735	0.98	1.00914e-13	0.202309	2.85095	0.95	1		0.532445		1		0.0934682		0.732406	0.127332	0.0503852	0	FALSE
SLC15A3	4		0.000183346	0.0830648	0.501137	0.98	0.350026		0.861781		0.918342		1.03207		7.32626e-05	0	0.300947	1	0.660177	0.217125	0.0514063	0.825413	FALSE
LOC155060	3		0.00155373	0.0830648	0.774751	0.98	0.121739	0.90091	1.17759	0.43	1		0.553796		0.824998		0.246976		0.378076	0.214734	0.120247	0.723524	FALSE
MANEA	3		0.0364894	0.0830648	0.57204	0.98	0.00397389	0.0993222	0.805182	0.98	1		0.0273776		1		0.0932161		0.799414	0.154012	0.046574	0	FALSE
RUSC1-AS1	4		6.85773e-07	0.0830648	0.279445	0.98	3.18617e-07	0.641445	1.52289	0.74	1		0.0223065		1		0.0440046		0.424891	0.143581	0.116111	0	FALSE
CCDC43	4		0.0299413	0.0830648	0.444301	0.98	0.133062	0.25857	0.916018	0.93	1		0.536932		1		0.0189621		0.668021	0.154343	0.0963325	0	FALSE
PGAP3	3		3.81956e-07	0.0830648	1.093	0.98	0.00222924	0.622106	1.45078	0.75	0.000194171	0.14656	0.449172	0.96	1		0.0581304		0.604255	0.167527	0.0934873	0	FALSE
TPTEP2-CSNK1E	4		4.5787e-06	0.0830648	0.477166	0.98	0	0.551695	2.55338	0.79	1		0.406687		0.00511275	0	0.199894	1	0.625209	0.112401	0.0880267	0	FALSE
CAPN2	4		0.123178	0.0830648	0.135468	0.98	0	0	3.72103	1	3.08067e-07	0	0.550709	1	1.20803e-05	0	0.14536	1	0.742766	0.140463	0.0227218	0	TRUE
MALAT1	4		0.166881	0.0830648	0.445053	0.98	1		0.098457		1		0.0785977		1		0.151372		0.352148	0.141215	0.128723	0	FALSE
KIF27	4		0.0527243	0.115309	0.669148	0.97	1.14005e-07	0.514929	1.91391	0.81	1		0.396719		1		0.0880986		0.507667	0.175795	0.127008	0	FALSE
TBC1D8	4		0.00923488	0.115309	0.282777	0.97	0.00229265	0.0993222	1.27823	0.98	1		0.180716		1		0.0850431		0.462938	0.157384	0.0830905	0.663977	FALSE
ABCB1	3		4.24128e-08	0.115309	1.23072	0.97	0.169731		0.595426		1		0.06254		1		0.035078		0.48806	0.170871	0.0694488	0	FALSE
KIAA1324	2		0.142309	0.115309	0.169924	0.97	1		2.22462		0.0336941	0.35347	0.651023	0.87	1		0.0120788		0.664294	0.126841	0.0526304	0	FALSE
PEX1	4		0.0114722	0.115309	0.611626	0.97	1		0.253458		1.25085e-05	0.117771	1.02411	0.97	1		0.120405		0.366602	0.16143	0.118113	0	FALSE
GBA2	4		0.254749	0.115309	0.478259	0.97	3.00954e-11	0.283304	1.9219	0.92	1		0.04613		1		0.219134		0.558284	0.125355	0.0683042	0	FALSE
LOC105370397	3		0.000277039	0.115309	0.692005	0.97	1		0.017939		1		0.0243976		1		0.0943376		0.255845	0.178932	0.134	0.00267697	FALSE
ANKRD6	2		0.0176351	0.115309	0.690261	0.97	0.259183		1.72761		1		0.221504		0.0090375	0.083524	0.590725	0.98	0.468742	0.130554	0.11049	0.743499	FALSE
LOC105371942	2		0.260153	0.115309	0.609605	0.97	1		0.578185		1		0.159617		1		0.00275404		0.798461	0.172273	0.0292665	0	FALSE
CHD3	4		0.00298256	0.115309	0.29499	0.97	0.164965		0.38845		0.00426132	0	0.362913	1	1		0.0398392		0.235897	0.160076	0.131846	0.00289753	FALSE
U2AF1L4	4		0.271988	0.115309	0.230063	0.97	0.0928325	0.170763	1.90656	0.96	0.290359		0.230045		0.000647973	0	0.709948	1	0.360404	0.189738	0.136959	0	FALSE
ANO10	4		0.133129	0.115309	0.316435	0.97	0.0137441	0.308812	2.55537	0.91	1		0.247398		1		0.0725472		0.695381	0.104477	0.0487042	0	FALSE
TYW5	3		0.0434708	0.115309	0.870076	0.97	3.36865e-06	0.25857	1.75834	0.93	1		0.514723		1		0.192601		0.496584	0.272363	0.109066	0	FALSE
ITGAE	4		0.0824735	0.115309	0.539956	0.97	1		1.70382		1		0.602653		1		0.000899146		0.791951	0.128888	0.0497084	0	FALSE
SLC1A7	2		0.0766144	0.115309	0.422784	0.97	1		0.0569873		1		0.00597426		1		0.00390281		0.205838	0.128343	0.0862821	0.0546225	FALSE
UPF3A	4		0.0281277	0.115309	0.138918	0.97	0.0822348	0.138409	0.78044	0.97	2.89817e-12	0.0471625	0.447716	0.99	1		0.00856576		0.478602	0.141768	0.0739428	0	FALSE
PRPSAP2	4		0.0956857	0.115309	0.126249	0.97	0.000944853	0.90091	2.26518	0.43	1		0.194414		1		0.610057		0.545025	0.189549	0.120272	0	FALSE
PRODH	2		0.00378839	0.115309	0.512779	0.97	0.00055965	0.37737	1.81658	0.88	0.0646965	0.247568	0.734281	0.92	0.798354		0.128868		0.710676	0.135273	0.0689697	0	FALSE
THUMPD2	4		0.000907147	0.115309	0.372531	0.97	8.5851e-11	0.957583	1.67224	0.53	0.253689	1	0.552131	0.5	1		0.2365		0.329241	0.216096	0.179708	0	FALSE
PYGL	3		0.00240007	0.115309	0.394429	0.97	0	0	2.02402	1	1		0.0581506		1		0.0499565		0.751625	0.106007	0.0358808	0	FALSE
SLC1A3	3		0.00856946	0.115309	0.780962	0.97	1		0.791912		0.160139	0.269412	1.07081	0.91	0.000620642	0.190729	0.750081	0.94	0.387007	0.271964	0.134584	0.0505563	FALSE
SIPA1L1	4		0.205713	0.115309	0.351354	0.97	0	0	0.927581	1	0.905634		0.251674		1		0.0136293		0.244546	0.15623	0.125007	0	FALSE
FCF1	4		0.00108213	0.115309	0.724989	0.97	1		0.607472		4.7653e-07	0.200259	0.397996	0.94	1		0.087339		0.523946	0.31434	0.122368	0	FALSE
ECD	4		0.165469	0.115309	0.25332	0.97	0.0284518	0.481448	2.37093	0.83	2.8461e-05	0	0.710506	1	1		0.0742075		0.679186	0.134197	0.0629978	0	FALSE
CA5B	4		0.154263	0.115309	0.608831	0.97	1		0.678079		0.65366		0.311217		0.347941	0.190729	0.348509	0.94	0.320476	0.1957	0.138888	0	FALSE
PRICKLE1	4		0.000833278	0.115309	0.694144	0.97	1		0.278808		0.000618531	0.0471625	1.05674	0.99	1		0.19447		0.534369	0.272277	0.0531809	0	FALSE
KANSL1L	4		0.00241739	0.115309	1.22019	0.97	0.871688		0.424866		1		0.0156822		1		0.215661		0.374665	0.168479	0.097817	0	FALSE
TFEB	3		0.157766	0.115309	0.274518	0.97	1		1.80226		1		0.246296		1		0.0203144		0.611526	0.158667	0.0770698	0	FALSE
KAT2B	3		0.0473135	0.115309	0.58046	0.97	0.367746		1.46888		1		0.120686		0.232017	0.141281	0.305274	0.96	0.377384	0.154807	0.100971	0	FALSE
CACNB2	4		0.121087	0.115309	0.622834	0.97	0.467708		0.352325		1		0.000949147		1		0.420818		0.181993	0.161181	0.151361	0	FALSE
TCN2	4		0.225737	0.115309	0.141628	0.97	0	0	3.44486	1	1		0.112392		1		0.0516779		0.741318	0.0800777	0.0455668	0	FALSE
ATP8A1	2		0.0155312	0.115309	0.463518	0.97	1		0.689171		1		0.00136377		1		0.23288		0.355856	0.153116	0.0980185	2.69843	FALSE
WWOX	4		6.29982e-05	0.115309	0.550169	0.97	2.11022e-05	0.283304	1.59958	0.92	0.0112923	0.563051	0.560858	0.76	1		0.116106		0.536616	0.11483	0.0696604	0	FALSE
unknown_chr8_17900000	4		7.19939e-06	0.115309	0.795152	0.97	1		0.00775093		1		0.0176498		1		0.140198		0.509767	0.23076	0.113716	0	FALSE
FMO4	2		0.0295426	0.115309	0.433262	0.97	0.00421382	0.641445	1.50078	0.74	1		0.0335839		1		0.218129		0.511024	0.185215	0.109602	1.05897	FALSE
TCEAL8	4		5.94859e-05	0.115309	1.20472	0.97	0.054889	0.0993222	0.815645	0.98	0.0348499	0.0471625	0.25097	0.99	1		1.19103e-15		0.916137	0.0838635	6.49133e-31	0	FALSE
IER5	3		1.68328e-06	0.115309	0.970792	0.97	0.746546		0.184178		1		0.0677281		1		0.0269241		0.130445	0.120407	0.0907431	0	FALSE
CAAP1	4		0.0305954	0.115309	0.369561	0.97	2.71072e-10	0.588882	1.86962	0.77	0.779388		0.534319		1		0.252226		0.606652	0.140503	0.0972686	0	FALSE
NOP14	4		1.08357e-05	0.115309	0.680508	0.97	1		0.38314		1		0.0888493		1		0.0283674		0.251959	0.173344	0.114833	0	FALSE
IL1R2	2		0.138789	0.115309	0.240207	0.97	3.60739e-15	0	3.66197	1	1		0.188145		1		0.48309		0.542599	0.123491	0.102499	0	TRUE
PHC3	4		0.038136	0.115309	0.227087	0.97	0	0	2.63394	1	1		0.20965		1		0.312241		0.567805	0.115345	0.0770387	0	FALSE
FAM122B	2		0.00570981	0.115309	0.536537	0.97	0.0132854	0.230835	0.798749	0.94	1		0.200953		0.0101076	0.259254	0.640317	0.91	0.290262	0.246038	0.219555	0	FALSE
HEATR6	3		0.0250457	0.115309	0.343072	0.97	0.000347104	0.25857	1.35058	0.93	1		0.355733		1		0.0292955		0.315315	0.236396	0.164721	0	FALSE
STON1	2		4.30716e-05	0.115309	1.54612	0.97	0.0013136	0.0993222	1.29342	0.98	3.48892e-09	0	1.07931	1	1		0.0133456		0.720356	0.197303	0.0474669	0	FALSE
LSR	4		4.67571e-05	0.115309	0.364621	0.97	0.243665		0.50278		0.000501834	0.174218	0.719312	0.95	1		0.0465904		0.535532	0.19898	0.0829939	0.479522	FALSE
CPNE2	4		0.000153721	0.115309	0.53672	0.97	0	0	3.19117	1	0.0559247	0.0471625	0.852462	0.99	1		0.325432		0.732403	0.076154	0.0648887	0	FALSE
ZNF550	2		0.00390537	0.115309	0.983472	0.97	0.000955431	0.514929	1.54362	0.81	0.415038		0.856514		1		0.0785668		0.706349	0.248444	0.0344843	0.0388034	FALSE
CCDC196	2		6.19505e-05	0.115309	0.919356	0.97	1.08135e-05	0.170763	0.979956	0.96	0.496759		0.240725		1		0.441242		0.6035	0.241209	0.155291	0	FALSE
MGAT5	2		0.203226	0.115309	0.309636	0.97	1		0.0383325		1		0.00439107		1		0.264923		0.368459	0.134558	0.122289	0	FALSE
ELOVL5	4		5.49013e-06	0.115309	0.568788	0.97	0	0	2.10471	1	0.000137011	0	0.380678	1	1		0.0456503		0.540643	0.173759	0.110139	0.56972	FALSE
EP300	4		0.000188346	0.115309	0.785646	0.97	0	0.25857	1.95136	0.93	1		0.266643		1		0.0291193		0.651644	0.173951	0.0578521	0	FALSE
SOBP	2		0.0391091	0.115309	0.293457	0.97	1		0.822683		1		0.183938		1		0.132086		0.52456	0.147992	0.138894	0	FALSE
LIMS1	4		0.154178	0.115309	0.325224	0.97	2.40178e-06	0.0993222	1.06405	0.98	2.96263e-07	0.966094	0.874775	0.52	0.013187	0	0.178825	1	0.555872	0.21757	0.0590595	0	FALSE
LEO1	4		0.090424	0.115309	0.277005	0.97	1		1.64829		1		0.350754		2.72641e-08	0.16679	0.538213	0.95	0.523564	0.274161	0.108432	0	FALSE
MICU3	3		0.00997841	0.115309	0.479261	0.97	3.28487e-08	0.283304	2.50173	0.92	1		0.876589		1		0.135375		0.655806	0.191617	0.0345254	0	FALSE
HIPK2	4		0.0011207	0.115309	0.578953	0.97	1.51063e-11	0	1.95586	1	0.114525	0.247568	0.52805	0.92	1		0.00766932		0.477502	0.1929	0.150791	0	FALSE
RUNX1	3		0.00245347	0.115309	0.553834	0.97	7.39714e-06	0.0993222	0.989171	0.98	1		0.0325801		1		0.069394		0.391214	0.150597	0.121654	0.859004	FALSE
RUFY3	4		0.0617844	0.115309	0.328939	0.97	1.82871e-15	0	1.20095	1	1		0.0573703		1		0.0230008		0.280201	0.20086	0.14578	0	FALSE
SPATA33	4		5.28252e-06	0.115309	1.18868	0.97	1.50565e-07	0.588882	1.00813	0.77	1		0.460792		1		0.143425		0.521357	0.245534	0.136561	0	FALSE
SRSF7	4		0.00289425	0.115309	0.139205	0.97	0.0302832	0	0.374729	1	0.0118499	0.290486	1.51866	0.9	1		0.130871		0.378843	0.308028	0.174154	0	FALSE
CYP4V2	3		0.115292	0.115309	0.476159	0.97	0.0380475	0.604311	1.29997	0.76	0.0335771	0.0471625	0.494095	0.99	0.315386	0.795321	0.591816	0.62	0.569924	0.163448	0.11517	0	FALSE
ZMAT1	3		0.00438654	0.115309	0.564862	0.97	1.46011e-08	0.308812	1.686	0.91	1		0.0403188		1		0.0419429		0.497711	0.158124	0.131025	1.74781	FALSE
SULT1A2	2		0.0222166	0.115309	0.555262	0.97	1		1.14412		1		0.745213		1		0.493666		0.437914	0.227528	0.158679	0.527553	FALSE
RNF123	3		0.00237143	0.115309	0.610269	0.97	1.71649e-05	0.0993222	1.07107	0.98	1		0.291342		1		0.47495		0.494717	0.176111	0.133933	0	FALSE
LOC105379362	2		2.40912e-07	0.115309	1.03174	0.97	3.15287e-12	0.356494	1.70666	0.89	0.393783		0.826966		1		0.0992364		0.739207	0.235886	0.0249062	0	FALSE
LOC107984079	3		5.72658e-05	0.115309	0.637785	0.97	1		0.144548		1		0.57788		0.458057		0.190944		0.38472	0.255022	0.134304	0	FALSE
SLC36A4	4		0.00331186	0.115309	0.386761	0.97	0	0	2.59425	1	1		0.320401		1		0.0847012		0.695373	0.101947	0.087117	0	FALSE
MED4	4		0.0175467	0.115309	0.24093	0.97	0.737102		2.0654		1		0.996944		1		0.0916429		0.567676	0.312307	0.0460533	0	FALSE
TOE1	3		0.110682	0.115309	0.277075	0.97	1		1.53737		0.0032289	0.0471625	0.500432	0.99	0.261389	0.502142	0.365318	0.79	0.612149	0.19663	0.11687	0	FALSE
FOXO3	4		0	0.115309	0.952536	0.97	0	0	1.07743	1	0.723704		0.134028		1		0.103416		0.460041	0.167356	0.0676758	0.809598	FALSE
SLC44A3	2		0.0391091	0.115309	0.614627	0.97	8.52583e-09	0	1.97006	1	1		0.110984		0.388493	0.190729	0.694313	0.94	0.478685	0.131616	0.108242	0	FALSE
DOCK4	3		0.160828	0.115309	0.428277	0.97	1		0.146296		1		0.306747		1		0.0777975		0.302786	0.17433	0.0845215	0.13306	FALSE
SEC24D	4		0.057845	0.115309	0.306297	0.97	0.784694		1.11476		0.00476187	0.290486	0.686215	0.9	1		0.493668		0.498609	0.140565	0.0990385	0	FALSE
unknown_chr12_120500000	2		3.74465e-05	0.115309	1.13889	0.97	0.937074		0.209745		1		0.110508		1		0.115468		0.36647	0.199935	0.171429	0	FALSE
SRPK2	4		0.0610568	0.115309	0.223064	0.97	2.66541e-06	0.25857	1.36004	0.93	1		0.188653		1		0.187945		0.384636	0.273588	0.118774	0	FALSE
LIME1	2		0.114207	0.115309	0.207284	0.97	0.0143176	0.0566409	0.636247	0.99	0.0130472	0.174218	0.671781	0.95	1		0.0608239		0.570838	0.199118	0.0580631	0	FALSE
ERLIN2	3		0.0402665	0.115309	0.377677	0.97	0.0398802	0.88641	1.98011	0.58	0.0263283	0.117771	0.890069	0.97	0.00669799	0.502142	0.790229	0.79	0.481817	0.216593	0.17852	0	FALSE
CIPC	2		0.00594284	0.115309	0.891167	0.97	0.0887441	0	1.01288	1	0.823143		0.184756		1		0.106499		0.580177	0.271283	0.113143	0	FALSE
SURF6	3		0.00156422	0.115309	0.658945	0.97	3.20316e-06	0	1.11914	1	1		0.363784		1		0.25718		0.558089	0.175804	0.12306	0.89329	FALSE
unknown_chr2_171600000	3		7.90732e-06	0.115309	1.32071	0.97	3.08214e-06	0.283304	1.14376	0.92	1		3.39319e-16		1		9.29939e-18		1	7.81378e-33	1.10519e-34	0	FALSE
BPTF	4		0.22011	0.115309	0.216043	0.97	0.562809		0.176896		0.0265893	0	0.246722	1	1		0.0695761		0.196416	0.125675	0.0986322	0	FALSE
COA6	4		0.0253146	0.115309	0.259782	0.97	0.0220155	0.440598	1.16182	0.85	1		0.0425663		1		0.0727009		0.59537	0.209374	0.166851	0	FALSE
MECP2	4		0.0025117	0.144177	0.573029	0.96	1.43955e-13	0.771726	1.88512	0.66	0.00149662	0.433895	0.707414	0.83	1		0.21105		0.610778	0.152358	0.064561	1.44386	FALSE
PUF60	4		0.000695828	0.144177	0.240548	0.96	4.03214e-10	0.0993222	1.30704	0.98	1		0.806627		1		0.0499119		0.489331	0.386923	0.0840184	0.897494	FALSE
ZNF623	2		0.00014999	0.144177	1.33441	0.96	0.000171966	0.970597	1.4093	0.52	1		0.17412		1		0.0029048		0.630519	0.365208	0.00427328	0.554408	FALSE
MCM6	4		0.0356133	0.144177	0.674333	0.96	1		1.10116		0.0251786	0.174218	0.376703	0.95	0.990333		0.203217		0.426707	0.167957	0.110138	0	FALSE
TMEM120B	2		0.00176918	0.144177	0.670633	0.96	1		0.0592082		1		0.089115		0.00226791	0.16679	0.632611	0.95	0.485673	0.146465	0.132625	0	FALSE
PTRH1	4		0.13725	0.144177	0.437369	0.96	1		0.320237		1		0.0632152		1		0.440251		0.340799	0.212287	0.154623	0	FALSE
ZNF438	4		1.21298e-05	0.144177	0.643476	0.96	0.00416765	0.283304	1.10763	0.92	1		0.197819		0.96326		0.179201		0.364658	0.183008	0.129802	0.974137	FALSE
ZNF605	3		0.134065	0.144177	0.322738	0.96	2.05177e-05	0	1.00542	1	1		0.510365		1		0.509455		0.443143	0.27766	0.0940718	0	FALSE
AP4B1-AS1	4		0.00976425	0.144177	0.315824	0.96	0.00048411	0	0.504551	1	2.16256e-07	0	0.834983	1	1		0.102354		0.191443	0.181856	0.0994868	0	FALSE
NUP42	4		0.174469	0.144177	0.135111	0.96	0.00220061	0.170763	1.89435	0.96	1		0.113338		1		0.00363801		0.607353	0.138596	0.129047	0	FALSE
FKBP1B	3		0.0175913	0.144177	0.248564	0.96	8.83276e-09	0.138409	1.01673	0.97	1		0.1326		1.48127e-05	0.422576	1.02052	0.83	0.430666	0.323597	0.140337	0	FALSE
LOC101929185	4		9.98342e-08	0.144177	0.642368	0.96	0.0208876	0.845	0.468493	0.61	1		0.411588		1		0.170149		0.372065	0.320917	0.176154	0.324634	FALSE
AGPS	4		0.109838	0.144177	0.460252	0.96	7.37815e-11	0	2.7497	1	1		0.275595		1		0.373166		0.678129	0.105467	0.0797535	0	FALSE
ORC3	4		1.91087e-14	0.144177	0.620843	0.96	3.58495e-05	0.0566409	0.93447	0.99	1		0.00495176		1		0.000443495		0.544821	0.105997	0.0602116	0	FALSE
KPNA5	4		1.01329e-05	0.144177	1.59601	0.96	1		1.37659		0.012359	0.789002	0.80065	0.63	1		0.0663449		0.507199	0.23013	0.102108	0	FALSE
TXLNA	4		0.103541	0.144177	0.33454	0.96	0.0485723	0.333886	1.40149	0.9	1		0.27678		1		0.264241		0.455702	0.176679	0.118259	0	FALSE
PGAM5	2		0.0522609	0.144177	0.695986	0.96	1.7914e-06	0.534129	1.51202	0.8	1		0.25784		1		0.197309		0.422507	0.203265	0.179907	2.26596	FALSE
LOC389641	3		0.12288	0.144177	0.406847	0.96	0.747097		0.53696		1		0.000378819		1		0.1714		0.424365	0.212558	0.148893	0	FALSE
GRINA	4		0.209852	0.144177	0.312085	0.96	0.0172048	0.0993222	1.16608	0.98	1		0.140686		1		0.110587		0.646105	0.218913	0.0688437	0	FALSE
BAIAP2	4		0.120294	0.144177	0.263799	0.96	0.00853032	0.787329	2.40197	0.65	3.04651e-11	0	1.04185	1	0.106613	0.764717	0.527562	0.64	0.569042	0.190506	0.0807502	0	FALSE
AMOTL2	3		1.04606e-05	0.144177	0.734978	0.96	1		0.213078		1		0.382802		0.000236364	0.386	0.579209	0.85	0.682513	0.146234	0.0733773	0	FALSE
SCLT1	4		0.00214957	0.144177	0.756442	0.96	0.112086	0.333886	1.03779	0.9	1		0.277761		1		0.189994		0.343074	0.120273	0.112779	0.0126929	FALSE
ABCB9	2		0.0564233	0.144177	0.569904	0.96	9.59551e-05	0.0566409	1.46651	0.99	0.748988		0.49315		1		0.34522		0.457862	0.156584	0.142857	0	FALSE
unknown_chr10_7700000	4		0.214928	0.144177	0.864176	0.96	0.26824		0.881143		1		0.0756816		1		0.170657		0.700356	0.274319	0.0207279	0	FALSE
SNHG26	2		0.00288058	0.144177	1.45994	0.96	0.00150949	0.0993222	1.00505	0.98	0.580612		0.431019		1		0.0823591		0.423746	0.307575	0.13098	0	FALSE
PPP1R9A	2		8.2236e-05	0.144177	0.811696	0.96	1		0.492848		1		0.0514583		1		0.124412		0.326926	0.148526	0.0960713	0	FALSE
IRAK1	3		0.000124977	0.144177	0.592098	0.96	0.00100727	0.356494	1.23946	0.89	1		0.204443		0.743992		0.355153		0.603173	0.180882	0.0832201	0	FALSE
PCYT2	4		0.0437526	0.144177	0.361925	0.96	0.00115445	0.672868	2.46318	0.72	0.00648199	0.117771	0.434917	0.97	1		0.141729		0.624398	0.212235	0.0838913	0	FALSE
SAT2	4		2.3829e-05	0.144177	0.438106	0.96	0.000115277	0.356494	1.02175	0.89	1		1.05624		1		0.241722		0.348715	0.281976	0.233554	0	FALSE
ZSCAN31	2		0.00232428	0.144177	0.924498	0.96	0.348838		0.868484		0.000159879	0	0.636379	1	1		0.162144		0.343631	0.226199	0.183331	0.326323	FALSE
PCGF3	4		0.00358768	0.144177	0.507084	0.96	1		0.0115918		0.00153311	0.117771	0.605787	0.97	1		0.300012		0.557679	0.163582	0.0947711	0	FALSE
SNX14	4		0.062346	0.144177	0.264876	0.96	0.437713		0.534992		1		0.140377		1		0.187625		0.394129	0.179347	0.0933222	0.222383	FALSE
PREX1	3		0.0473135	0.144177	0.310652	0.96	1		0.545435		1		0.439616		0.297961	0.16679	0.163552	0.95	0.377863	0.152146	0.13584	0	FALSE
TSEN54	4		0.279847	0.144177	0.166146	0.96	1		2.25901		1		0.219711		1		0.0932046		0.68131	0.113137	0.0558046	0	FALSE
NR2F2-AS1	3		0.0360945	0.144177	0.680284	0.96	0.418733		0.959946		0.034724	0.0471625	0.512538	0.99	1		0.146672		0.293549	0.205905	0.112298	0.476643	FALSE
ZNF75A	4		0.0936106	0.144177	0.448667	0.96	0.402591		0.776797		1		0.24308		0.00139246	0	0.606783	1	0.357973	0.245448	0.144681	0.53971	FALSE
AOPEP	4		0.206142	0.144177	0.389421	0.96	0.000451493	0.308812	0.820514	0.91	1		0.0735383		1		0.10363		0.419358	0.244832	0.0691553	0	FALSE
TUBG2	4		1.73298e-05	0.144177	0.63489	0.96	1.14458e-08	0.138409	1.04693	0.97	1		0.0472151		1		0.04796		0.536878	0.190105	0.0962198	0	FALSE
RTTN	4		0.000808175	0.144177	0.953091	0.96	0.0273192	0.283304	1.47156	0.92	1		0.17162		1		0.0657672		0.358368	0.137983	0.0771981	0	FALSE
TYW3	4		0.116531	0.144177	0.239218	0.96	1		2.36402		2.84832e-10	0.689968	0.509337	0.69	1		0.11723		0.747952	0.102193	0.087098	0	FALSE
MAK16	4		4.17627e-05	0.144177	0.686636	0.96	4.1604e-10	0.0566409	1.15681	0.99	1		0.228991		0.083888	0.0469097	0.148607	0.99	0.872998	0.083519	0.0434834	0	FALSE
MDM4	4		0.117958	0.144177	0.247003	0.96	1		2.25902		0.0546378	0.951075	0.728405	0.53	1		0.131689		0.449347	0.311844	0.134712	0	FALSE
ARID1B	4		0.00901843	0.144177	0.976354	0.96	1.39776e-09	0.0566409	1.71659	0.99	1		0.094125		1		0.00752002		0.289163	0.159498	0.100076	0	FALSE
TCTN1	4		0.268706	0.144177	0.178807	0.96	0.21662		1.43659		0.000692343	0	1.15393	1	1		0.262889		0.425792	0.115499	0.09983	0	FALSE
STAB1	2		0.0430821	0.144177	0.300258	0.96	1		1.14986		0.236211	0.470944	0.636821	0.81	0.0645768	0.0469097	0.670112	0.99	0.426576	0.268046	0.165968	0	FALSE
NGLY1	4		0.153927	0.144177	0.278546	0.96	9.80827e-07	0	2.27766	1	4.3276e-05	0.14656	0.454759	0.96	1		0.312774		0.484988	0.188513	0.135742	0	FALSE
RALGPS1	3		0.0019773	0.144177	1.0676	0.96	0.0160632	0.308812	0.801764	0.91	0.0191793	0	0.548465	1	0.030803	0	0.393215	1	0.389894	0.137879	0.0959114	0.296951	FALSE
TPK1	4		0.00067899	0.144177	0.614084	0.96	0.33149		1.52938		0.199683	0.951075	0.663254	0.47	1		0.128789		0.507488	0.177564	0.100436	0	FALSE
CEP164	4		6.418e-07	0.144177	0.857348	0.96	0.887615		0.294896		1		0.914871		1		0.0726457		0.469611	0.247716	0.0682006	0	FALSE
CLEC2D	3		0.185944	0.144177	0.604446	0.96	2.22189e-12	0	1.51926	1	1		0.434598		1		0.603494		0.337603	0.253548	0.152424	0	FALSE
TCFL5	2		0.0591279	0.144177	0.777408	0.96	0.0929963	0.534129	0.770606	0.8	1		0.719654		1		0.143095		0.349152	0.244821	0.179619	0	FALSE
NFATC2	3		0.000844406	0.144177	0.913601	0.96	4.64313e-05	0.138409	0.912235	0.97	1		0.55609		1		0.278843		0.331611	0.237211	0.147927	0	FALSE
HIVEP3	2		3.4221e-08	0.144177	0.770183	0.96	0.707133		0.245178		1		0.0699181		1		0.162227		0.469291	0.184027	0.0824691	0	FALSE
XAB2	4		0.000278754	0.144177	0.302538	0.96	0.094123	0.970597	0.882689	0.52	0.199776	0.0853416	0.579158	0.98	5.46563e-06	0.0469097	0.275364	0.99	0.515018	0.28616	0.188021	0	FALSE
XIST	4		0.172113	0.144177	0.602606	0.96	0.795263		0.324476		1		0.176623		0.00793086	0.141281	0.446007	0.96	0.306111	0.248683	0.14008	0	FALSE
HIF3A	3		0.278804	0.144177	0.216487	0.96	0.348451		1.51825		1		0.0357652		1		0.00486975		0.38311	0.157884	0.119134	0.22911	FALSE
MILR1	4		1.94886e-05	0.144177	0.53949	0.96	0.000282119	0.202309	0.934441	0.95	1		0.02046		1		0.0436277		0.395567	0.183164	0.145389	0	FALSE
ABCA9	2		0.153999	0.144177	0.205214	0.96	0.00194101	0	1.36316	1	0.0438495	0	0.461502	1	1		0.130227		0.325444	0.146223	0.088003	0.438694	FALSE
[truncated: 10,718 more rows]

## Sheet: table3D
geneR1A_uniq	num_onts	sub_col	chi2_pval_adj_scZ	perm_pval_adj_scZ	max_abs_median_scZ	perm_cdf_scZ	chi2_pval_adj_svd_z0	perm_pval_adj_svd_z0	max_abs_median_svd_z0	perm_cdf_svd_z0	chi2_pval_adj_svd_z1	perm_pval_adj_svd_z1	max_abs_median_svd_z1	perm_cdf_svd_z1	chi2_pval_adj_svd_z2	perm_pval_adj_svd_z2	max_abs_median_svd_z2	perm_cdf_svd_z2	f0	f1	f2	gene_max_diff	sig
[truncated: 7,529 more rows]

[truncated: 4 more sheets: table3E, table3F, table3G, table3H]
