# Supplementary material for: RNA splicing programs define tissue compartments and cell types at single-cell resolution
Source: eLife journal article supplement (doi:10.7554/elife.70692), 2021-09-13
Supplement: supp [file elife-70692-supp-v1.zip › elife_poa_e70692_Supplementary_file_3.xlsx]

## Sheet: table4A
geneR1A_uniq	num_onts	sub_col	chi2_pval_adj_scZ	perm_pval_adj_scZ	max_abs_median_scZ	perm_cdf_scZ	chi2_pval_adj_svd_z0	perm_pval_adj_svd_z0	max_abs_median_svd_z0	perm_cdf_svd_z0	chi2_pval_adj_svd_z1	perm_pval_adj_svd_z1	max_abs_median_svd_z1	perm_cdf_svd_z1	chi2_pval_adj_svd_z2	perm_pval_adj_svd_z2	max_abs_median_svd_z2	perm_cdf_svd_z2	f0	f1	f2	gene_max_diff	sig
A2M	34		0	0	0.564588	1	1		0.798695		1		0.636164		1		1.18325		0.551657	0.20422	0.136055	1.62353	TRUE
RBM39	38		0	0	0.526525	1	0	0	2.79916	1	0.572041		1.58336		1		0.243526		0.348161	0.240547	0.0850546	1.50225	TRUE
RBM25	9		0.117843	0	0.302944	1	0.00030369	0.05642	2.24976	0.98	3.70003e-11	0	0.822258	1	8.96393e-06	0.146766	0.489311	0.94	0.599079	0.152527	0.0955769	1.47905	FALSE
RACK1	146		0	0	0.410097	1	0	0	3.13724	1	0	0	0.567705	1	1		0.0802846		0.681227	0.119546	0.0839119	1.55257	FALSE
RABAC1	50		2.22005e-05	0	0.285911	1	1		1.64962		1		0.0948048		1		0.129373		0.678921	0.175866	0.06218	1.12433	FALSE
PTPRE	6		0.000411202	0	0.349242	1	0.00139506	0.02933	1.46231	0.99	0.00303528	0	0.478777	1	1.009e-07	0	0.770336	1	0.386909	0.256697	0.124983	0.79095	FALSE
PTMA	150		0	0	0.342777	1	0	0	2.84167	1	0	0	0.993297	1	0	0	0.376099	1	0.872091	0.0697852	0.0204897	0.966635	FALSE
PTGES3	53		0	0	0.515874	1	0	0	2.97894	1	0	0	1.26065	1	2.18469e-10	0	0.238599	1	0.77918	0.141431	0.0369966	2.0895	TRUE
PTGDS	23		0.0017178	0	0.123352	1	0	0	3.74352	1	0	0	1.61645	1	6.08498e-07	0	1.18208	1	0.811495	0.111673	0.0458477	0.544274	FALSE
PSME1	51		5.78572e-06	0	0.31614	1	0	0	3.63468	1	1		0.628901		0	0	1.14149	1	0.605423	0.199886	0.142404	1.42572	FALSE
PSMC5	53		0.0173079	0	0.319755	1	0	0	0.988282	1	0	0	1.96351	1	1		0.11126		0.52837	0.229005	0.19045	1.2695	FALSE
PSMB6	32		2.71537e-09	0	0.314727	1	0.883846		1.50052		1		0.581451		1		0.0716493		0.646976	0.293879	0.0536176	0.69898	FALSE
PSMB4	66		0	0	0.537645	1	0.910389		2.59589		0	0	0.829932	1	1		0.0332371		0.807723	0.178489	0.0120619	1.36343	TRUE
RBM3	23		0.00316859	0	0.494266	1	0	0	2.45658	1	0	0	0.352749	1	1		0.0793351		0.499241	0.124641	0.111197	0.981073	FALSE
PSMB1	32		0.116965	0	0.300549	1	7.18256e-05	0	2.12179	1	1		0.133984		1		0.353805		0.957232	0.0352496	0.00751811	0.853805	FALSE
PSMA5	24		1.76697e-09	0	0.395559	1	1.3164e-05	0	2.38034	1	0	0.526715	0.65105	0.76	1		0.0230258		0.897735	0.075623	0.0136878	1.06656	FALSE
PSMA3	62		0.0664148	0	0.345036	1	1		1.59595		1		0.27896		0.000390648	0	0.542831	1	0.462165	0.228868	0.100211	1.44978	FALSE
PSIP1	16		0.000689006	0	0.457473	1	0	0	2.53199	1	0.00515806	0.566473	1.11409	0.74	0.00451321	0.473219	0.312176	0.79	0.593803	0.235613	0.0748114	2.28691	FALSE
PSAP	24		0	0	0.972365	1	0	0	3.56598	1	0	0	1.06463	1	0	0	0.715979	1	0.529463	0.120123	0.0917677	0.980537	TRUE
PRMT1	5		0.000262207	0	0.988713	1	0.000219604	0	0.942676	1	1		0.00669407		1		0.00132664		0.926783	0.0576141	0.0156025	1.09873	TRUE
PRG4	7		0.0430474	0	0.25291	1	1.44648e-05	0.628723	2.67258	0.7	0.00291867	0	0.923212	1	4.94998e-10	0	1.39714	1	0.44761	0.265688	0.167256	0.74588	FALSE
PRELID1	41		0.0444788	0	0.238444	1	1		0.470218		1		1.04962		1		0.0518024		0.573502	0.387217	0.0224984	0.5876	FALSE
PRDX5	63		0	0	0.559935	1	0	0	4.19214	1	0	0	1.50524	1	0	0	1.13801	1	0.65499	0.217297	0.0724705	1.33913	TRUE
PRDX4	40		0	0	0.36782	1	0	0	2.34497	1	0	0	0.822469	1	1		0.0584472		0.817337	0.134824	0.0351437	1.07084	FALSE
PQBP1	13		5.47143e-06	0	1.11972	1	1.18486e-05	0.05642	2.91435	0.98	3.42575e-06	0	1.10279	1	1		0.046819		0.563558	0.297862	0.0654211	3.25489	TRUE
PPP1R12A	14		3.65599e-15	0	0.611198	1	0	0	2.56211	1	0	0	1.82254	1	1.03426e-15	0	0.878631	1	0.446926	0.182588	0.128728	2.75281	TRUE
POSTN	3		3.65599e-15	0	0.445166	1	0.125669		1.6606		0	0	1.40308	1	1.14427e-06	0	0.453144	1	0.415733	0.276425	0.146119	0.487099	FALSE
PSMA7	102		1.6814e-10	0	0.167119	1	0	0	2.93769	1	1		0.167532		0	0	1.30429	1	0.781761	0.122191	0.0497917	0.345771	FALSE
RBP7	18		3.9666e-05	0	0.411029	1	1		2.43515		0.00188587	0.0302685	1.54781	0.99	1		0.0691765		0.887166	0.0807372	0.0161855	0.600424	FALSE
RDX	18		3.72601e-07	0	0.474542	1	0.000614095	0	1.97332	1	1		0.415112		1		0.574334		0.579708	0.114966	0.0923664	2.27351	FALSE
REX1BD	28		0.000105633	0	0.294897	1	1		1.83847		1		0.144165		1		0.0210393		0.855559	0.101255	0.0198343	1.22685	FALSE
RPL36A-HNRNPH2	108		0	0	0.992338	1	1		2.18628		1		0.0378512		1		0.0170748		0.796898	0.0698382	0.0535049	1.1365	TRUE
RPL35A	148		0	0	0.200001	1	0	0	4.01154	1	0	0	1.37628	1	0	0	0.727934	1	0.866312	0.0904615	0.0223776	0.669832	FALSE
RPL34	152		0	0	0.297117	1	0	0	3.89312	1	0.0263877	0	1.75342	1	1		0.0895857		0.953587	0.0281694	0.0102647	0.296789	FALSE
RPL32	152		0	0	0.539525	1	0	0	3.22257	1	1		0.0678442		1		0.0341048		0.864888	0.0575311	0.0356886	0.597672	TRUE
RPL31	95		0	0	0.564617	1	1		0.165237		1		1.46454		1		0.00887687		0.420306	0.334522	0.0737898	0.9549	TRUE
RPL29	25		0	0	1.40789	1	0	0	2.06889	1	0	0	2.12021	1	0	0	1.32295	1	0.257767	0.186205	0.120517	1.54569	TRUE
RPL27	131		0	0	0.407893	1	0	0	1.49972	1	1.05655e-08	0	0.125132	1	0	0	0.298937	1	0.737735	0.163259	0.0927604	1.50368	FALSE
RPL27A	144		0	0	0.548437	1	0	0	4.97656	1	0.000122911	0	0.0822077	1	1		0.0386055		0.797448	0.0712483	0.0393103	1.19429	TRUE
RPL26	21		0.000264884	0	0.611866	1	0.480863		0.33038		0	0	1.51635	1	0	0	2.81528	1	0.382072	0.250058	0.217854	1.71012	TRUE
RPL24	151		0	0	0.262998	1	6.47808e-12	0	2.22485	1	0	0	0.0824379	1	0	0	0.326781	1	0.930247	0.0220694	0.0124719	0.841145	FALSE
RPL23	143		0	0	0.249002	1	0	0	2.68095	1	1		0.349117		0	0	1.27822	1	0.648192	0.269734	0.0391792	0.709029	FALSE
RPL23A	134		0	0	0.292874	1	1		2.34505		1		0.0793017		1		0.108959		0.384359	0.297006	0.195266	0.398214	FALSE
RPL22L1	35		2.70978e-09	0	0.159816	1	0	0	3.30306	1	0	0	1.54429	1	1		0.0711391		0.710295	0.240201	0.0453894	0.916373	FALSE
RPL19	151		0	0	0.26835	1	1.17459e-13	0	13.0209	1	0	0	9.90583	1	0	0	3.39868	1	0.634224	0.118026	0.0482439	0.504444	FALSE
RPL18	150		0	0	0.164803	1	0	0	5.24876	1	0	0	1.21576	1	0	0	2.32797	1	0.444765	0.143936	0.132306	0.738542	FALSE
RPL17	147		0	0	0.430233	1	0	0	13.9806	1	0	0	4.13733	1	0	0	1.43314	1	0.760389	0.119908	0.0450265	1.38088	FALSE
RPL14	126		0	0	0.381026	1	0	0	4.00336	1	0	0	1.60094	1	0	0	0.647469	1	0.593656	0.142803	0.119123	1.11075	FALSE
RPL13	152		0	0	0.268678	1	0	0	4.11692	1	0	0	5.74439	1	0	0	1.10219	1	0.418074	0.168119	0.111939	0.329411	FALSE
RPL13A	152		0	0	0.199494	1	0	0	6.17345	1	0	0	2.21503	1	0	0	0.181801	1	0.759821	0.150969	0.0115641	0.340577	FALSE
RPL12	152		0	0	0.146383	1	0	0	5.26794	1	0	0	1.5164	1	0	0	0.754806	1	0.882282	0.0683103	0.0277077	1.04638	FALSE
RPL11	152		0	0	0.286117	1	0	0	5.25808	1	0	0	2.18958	1	0	0	1.04779	1	0.717939	0.140495	0.0568884	0.523305	FALSE
RPL10	152		0	0	0.228802	1	0	0	3.07422	1	0	0	0.980275	1	1		0.0199045		0.914892	0.0413593	0.00785047	0.189823	FALSE
RPL10A	139		0	0	0.132381	1	0	0	7.45927	1	1		0.259651		9.42753e-08	0	0.644287	1	0.705276	0.240041	0.0274652	0.650221	FALSE
RNF181	41		7.1972e-10	0	0.597195	1	0	0	1.17178	1	1		0.860592		1		0.842168		0.49127	0.31093	0.111373	1.5134	TRUE
RNASET2	39		0.0725347	0	0.440067	1	1		0.548782		1		0.06494		1		0.105992		0.371103	0.198024	0.1874	3.15688	FALSE
RGS2	7		0.107748	0	0.144478	1	1		1.31246		1		0.0436956		1		0.0286972		0.76988	0.217134	0.012986	0.434612	FALSE
REXO2	11		1.42031e-12	0	0.69017	1	5.18763e-10	0	2.09171	1	3.72844e-06	0	1.31823	1	0	0	0.580009	1	0.654016	0.11463	0.0820276	1.88259	TRUE
POMP	72		0	0	0.449856	1	1		1.72913		1		0.507399		1		0.233619		0.586224	0.173223	0.15551	1.10648	FALSE
POLR2I	45		0	0	0.689349	1	0	0	1.89122	1	1		0.599377		1		0.826415		0.755369	0.172742	0.0540833	1.40785	TRUE
PNRC1	33		0	0	1.55741	1	0	0	2.89315	1	0.0615979	0	0.571089	1	0.710993		0.526689		0.482928	0.113141	0.106406	1.69843	TRUE
PMP22	5		6.775e-06	0	0.341931	1	0	0	2.82062	1	0.103376	0	0.455207	1	1		0.0575332		0.790774	0.171128	0.0233688	1.44411	FALSE
unknown_chr6_GL000251v2_alt_4500000	46		0	0	0.15824	1	0	0	4.0664	1	0	0	1.30793	1	0	0	1.00961	1	0.504652	0.149497	0.119571	0.878439	FALSE
NDUFAB1	58		0	0	0.257376	1	0	0	0.811952	1	0	0	1.18586	1	1		0.0539097		0.579068	0.223668	0.157806	2.31913	FALSE
NDUFA4	98		0	0	0.397847	1	0	0	3.82801	1	0	0	1.54422	1	6.55556e-12	0	0.0493538	1	0.89492	0.100709	0.00321633	1.01628	FALSE
NDUFA1	68		0	0	0.452949	1	1		1.98822		1		0.00362527		1		0.00109769		0.990654	0.00736267	0.00189489	1.27035	FALSE
NCOA7	6		0	0	1.01316	1	0.334363		1.18988		0	0	1.07526	1	8.43572e-08	0	0.423523	1	0.37772	0.197734	0.143205	2.09475	TRUE
NCL	37		0.0480142	0	0.608934	1	0	0	2.84698	1	0.534367		1.97637		0	0	1.21929	1	0.571114	0.279403	0.0785642	1.46609	TRUE
NASP	42		0.000222469	0	0.254881	1	0	0	3.05554	1	0.245204		0.749672		2.06414e-07	0	0.89032	1	0.523166	0.117238	0.104758	1.3505	FALSE
NAP1L1	89		0	0	0.317281	1	0	0	2.88545	1	0.653731		0.749561		1		0.338639		0.432039	0.145154	0.111672	0.687616	FALSE
NACA	148		5.67406e-07	0	0.201814	1	0	0	9.8017	1	2.72625e-06	0	3.32345	1	1		0.0975497		0.80317	0.126882	0.0154353	1.08357	FALSE
MZT2A	13		7.07467e-08	0	0.404112	1	0	0.106968	3.73532	0.96	9.60143e-10	0.838594	0.932662	0.59	5.82132e-05	0.965872	0.293628	0.48	0.787739	0.204724	0.00608244	1.66027	FALSE
MYL6	144		0	0	1.00981	1	0	0	2.04444	1	0	0	2.11495	1	0	0	0.326254	1	0.552573	0.289098	0.0731411	1.89001	TRUE
MT1X	48		0	0	0.275179	1	1		2.81115		1		0.05352		1		0.140895		0.972139	0.0170131	0.00798846	1.45779	FALSE
MT1G	17		0.0249095	0	0.469513	1	0.00813881	0	0.517354	1	0.552298		0.104586		1		9.4598e-17		0.757526	0.242474	1.09095e-31	1.57373	FALSE
MT1A	10		0	0	0.544558	1	1.28893e-11	0	0.425298	1	0.249838		0.386732		1		0.0365369		0.757834	0.155466	0.0866994	1.48032	TRUE
MS4A7	17		1.40649e-06	0	0.332598	1	0.0082959	0	0.571438	1	1.22062e-09	0	0.580859	1	0.00201019	0	0.37973	1	0.312262	0.224811	0.137243	1.73638	FALSE
MS4A6A	22		0.00324128	0	0.186779	1	1		2.23402		1		0.788614		0	0.0282403	1.35968	0.99	0.589953	0.194677	0.159099	0.715993	FALSE
MS4A1	7		3.65592e-11	0	0.313186	1	4.86162e-14	0	3.01595	1	0	0	1.48524	1	2.69824e-08	0	0.273775	1	0.699978	0.206381	0.0329246	0.778836	FALSE
MNDA	10		0.00956209	0	0.357442	1	0	0.260561	2.75381	0.89	1		0.028985		7.62664e-06	0.40701	1.23827	0.18	0.632015	0.163918	0.150257	1.23214	FALSE
MICOS13	34		1.39323e-05	0	0.322856	1	1		1.50806		1		1.2212		1		0.0228224		0.68446	0.303652	0.00886499	0.831044	FALSE
MICOS10-NBL1	38		0	0	0.475447	1	0	0	4.13584	1	0	0.0302685	1.62553	0.99	1		0.0421773		0.80247	0.175424	0.0127164	0.711388	FALSE
MGST2	24		3.49365e-12	0	0.252596	1	0	0.796166	2.16046	0.61	0.188963		0.402246		0	0	0.903454	1	0.612762	0.204433	0.122137	1.32136	FALSE
METTL26	23		4.35743e-07	0	0.601944	1	0.272548		1.86448		1		0.367216		1		0.137779		0.48292	0.232667	0.14564	1.68508	TRUE
MARCO	11		6.1511e-11	0	0.304517	1	0	0	3.44802	1	1		0.774131		0.0628317	0.0777165	1.09164	0.97	0.667298	0.101343	0.0971167	0.953597	FALSE
MALAT1	7		2.85973e-09	0	0.858182	1	0.533956		0.777329		7.1458e-16	0	1.65614	1	0	0	0.91229	1	0.121302	0.05369	0.0465707	2.00407	TRUE
MACROD1	8		0.00941014	0	0.364649	1	0.921695		1.35195		1		0.738873		1		0.153172		0.422939	0.347319	0.106524	2.19866	FALSE
LYZ	29		9.27074e-06	0	0.169469	1	0	0	4.04407	1	0	0	1.72739	1	3.21581e-08	0	0.563807	1	0.254758	0.0897042	0.0740279	0.860802	FALSE
LYVE1	3		0.00844258	0	0.322666	1	5.65707e-06	0.129322	2.17011	0.95	8.07238e-05	0.672821	0.41666	0.68	1		0.0632986		0.807321	0.0946676	0.063885	0	FALSE
NDUFB1	27		5.12169e-14	0	0.58444	1	1		2.03857		1		0.124922		1		0.0358356		0.890388	0.0557633	0.0372478	1.90559	TRUE
RPL36	144		0	0	0.341717	1	0	0	2.71282	1	1		0.126393		1		0.0318308		0.640718	0.186892	0.0457749	0.559849	FALSE
NDUFB2	69		0	0	0.301787	1	0	0	2.7617	1	0	0	1.21504	1	1		0.0187013		0.828636	0.0904184	0.0379932	1.20489	FALSE
NDUFC1	42		2.10505e-05	0	0.277733	1	0.000346681	0.106968	2.75312	0.96	0.00130607	0.0576358	1.26141	0.98	1		0.00916229		0.86894	0.0735263	0.0249928	0.940895	FALSE
PLIN2	15		0	0	0.709654	1	0	0	2.43569	1	0	0	0.687027	1	7.7867e-09	0	0.255922	1	0.587378	0.223441	0.118222	1.56791	TRUE
PLBD1	3		1.71743e-11	0	0.273921	1	0	0	2.2047	1	0.0136927	0.177859	0.300351	0.93	0.000515875	0	0.208816	1	0.796501	0.148101	0.0472533	0.519698	FALSE
PLA2G2A	6		0	0	0.370395	1	1		0.807297		0.211885		1.47613		9.25607e-08	0	0.846087	1	0.606795	0.171671	0.108237	1.71429	FALSE
PHPT1	24		0.00561187	0	0.241706	1	0	0	2.08562	1	1		0.191926		1		0.0288637		0.909194	0.0730949	0.0177111	2.92221	FALSE
PFDN5	142		0	0	0.365163	1	1		0.280305		0	0	2.02795	1	0.0022435	0	0.380536	1	0.422854	0.378702	0.103781	0.774179	FALSE
PCM1	10		0.00011331	0	0.602712	1	0.934829		1.94657		0.00303276	0.0827523	0.745444	0.97	0.00612351	0.0777165	0.48302	0.97	0.521746	0.123737	0.0847104	1.81383	TRUE
PARP1	7		0.0447766	0	0.169557	1	1		1.67682		1		0.00303736		1		0.0131959		0.972661	0.0211386	0.00620068	0.618887	FALSE
PALLD	4		0.000189632	0	0.243493	1	1		2.71543		0.000257248	0	0.506423	1	0.53354		0.414079		0.698583	0.118267	0.0669373	0.491616	FALSE
PABPN1	49		2.51992e-09	0	0.475735	1	1		2.4534		1		0.486416		1		0.0457518		0.898302	0.0918763	0.00636655	0.959237	FALSE
PABPC1	81		0	0	0.680447	1	0	0	2.45932	1	0.00303998	0	0.715793	1	0	0	0.948085	1	0.604764	0.145809	0.107768	2.04514	TRUE
OSBPL8	17		4.13657e-08	0	0.630769	1	1.22602e-05	0.106968	1.75387	0.96	0.0587736	0.91009	0.785338	0.55	4.7902e-09	0	0.995524	1	0.477347	0.192692	0.122637	1.98999	TRUE
OLR1	3		0.00223242	0	0.652267	1	0.81338		0.518655		0.0375198	0.263883	1.31621	0.89	1		0.262987		0.584957	0.369825	0.0223161	0.28905	FALSE
OLFM1	3		5.62775e-07	0	0.36345	1	0	0	3.04682	1	0.472579		0.098184		0.0616362	0.0282403	0.254083	0.99	0.932449	0.053456	0.0140951	0.630289	FALSE
OCIAD2	38		0	0	0.564818	1	8.81541e-08	0	0.470832	1	0	0	0.675259	1	1		0.540692		0.448232	0.306648	0.101663	1.67241	TRUE
OAZ1	71		1.1645e-14	0	0.208019	1	1		0.504539		1		1.12196		1		0.00918091		0.334712	0.197789	0.0826626	1.88611	FALSE
NUDT22	20		0	0	1.71339	1	0	0	1.41297	1	0.0479468	0	1.05074	1	0	0	1.61579	1	0.50589	0.308289	0.12319	2.42655	TRUE
NUDC	8		0.00249389	0	0.342255	1	1.23877e-08	0	1.11209	1	0.000115453	0.263883	0.524874	0.89	1		0.0541033		0.57282	0.233715	0.146178	0.883129	FALSE
NPM1	73		1.46637e-12	0	0.345025	1	0	0	3.33496	1	0.00603196	0.0576358	1.51354	0.98	0	0	0.34111	1	0.757932	0.176183	0.0268429	0.894151	FALSE
NOP53	111		0	0	0.306992	1	0	0	2.66162	1	0	0	0.334602	1	0	0	1.16328	1	0.544804	0.117385	0.0731004	0.819528	FALSE
NME2	91		0	0	0.335302	1	0	0	2.02076	1	1		0.241972		1		0.105219		0.812621	0.039066	0.0307675	3.12061	FALSE
NKG7	35		6.66245e-06	0	0.25203	1	1		1.45172		1.91702e-06	0.0576358	1.65422	0.98	1		0.0844697		0.584261	0.306375	0.0893592	1.3723	FALSE
NFKBIA	50		0	0	0.442175	1	0	0	2.1415	1	0	0.0302685	0.726813	0.99	0.136548	0	0.313096	1	0.608204	0.179588	0.0792506	1.21862	FALSE
NEXN	12		5.16867e-08	0	0.371953	1	0	0	2.50155	1	0	0	1.40409	1	0.00107991	0.0532794	0.924826	0.98	0.529281	0.134176	0.0844149	1.10618	FALSE
NENF	11		0.00929105	0	0.505858	1	0.694627		0.753499		0	0.200444	1.81539	0.92	1		0.0940141		0.611275	0.313379	0.0655799	1.53752	TRUE
NDUFS8	32		3.51208e-06	0	0.286981	1	1		0.41175		1		1.40858		1		0.00215196		0.540907	0.440761	0.0128151	6.37361	FALSE
NDUFS7	35		0.000484555	0	0.187463	1	1		1.33293		1		0.00286694		1		8.06388e-05		0.988351	0.0106027	0.00104588	0.609091	FALSE
NDUFS6	47		0.0544781	0	0.233706	1	1		1.63839		1		0.0677234		1		0.0131333		0.546035	0.42176	0.0225402	0.539474	FALSE
NDUFB7	45		3.48378e-06	0	0.191315	1	0	0	2.04693	1	1		0.0601177		1		0.16895		0.863166	0.0781761	0.0498148	0.980679	FALSE
RPL37A	149		0	0	0.317626	1	0	0	2.51597	1	0	0	1.02917	1	0	0	0.517928	1	0.955676	0.0330155	0.00723615	0.405039	FALSE
RPL37	148		0	0	0.133351	1	1		1.50281		1		1.81915		1		0.00270076		0.602849	0.360667	0.00873068	0.630026	FALSE
RPL3	151		0	0	0.292084	1	0	0	2.90089	1	1		2.12605		1		0.121957		0.710048	0.0851887	0.0414717	0.444314	FALSE
TPM1	23		0	0	0.929636	1	0	0	2.46691	1	0	0	2.15108	1	0	0	0.900453	1	0.430323	0.224039	0.104081	1.21806	TRUE
TOP1	38		1.68532e-09	0	0.549903	1	0	0	2.5805	1	1		1.09797		2.8726e-08	0.0282403	1.10855	0.99	0.596237	0.178855	0.139672	2.69602	TRUE
TNFAIP2	5		2.42248e-09	0	0.690076	1	0.204779		0.429536		2.717e-08	0	0.720688	1	0.147327	0	0.325499	1	0.673119	0.190227	0.117566	0.599581	TRUE
TMSB4X	39		0	0	1.78299	1	0	0	5.20331	1	0.0161109	0	0.337597	1	1		0.0601855		0.45555	0.305819	0.0821875	2.08557	TRUE
TMSB10	137		0	0	0.244877	1	0	0	2.83243	1	1		0.099523		1		0.0715509		0.249784	0.0776989	0.0675129	1.17461	FALSE
TMEM258	56		0.010294	0	0.172727	1	0	0	2.21297	1	1		0.132258		0	0	0.898069	1	0.790155	0.116526	0.0507757	0.603753	FALSE
TMEM219	22		1.58735e-11	0	0.405661	1	1		2.07965		1		0.0862489		1		0.00346126		0.95805	0.0184943	0.0150875	1.23112	FALSE
TMEM147	20		1.45062e-10	0	0.444939	1	0	0	2.88084	1	0.126959	0	0.149496	1	1		0.0915812		0.812374	0.142433	0.0341589	3.71706	FALSE
TFF3	18		1.07824e-10	0	0.632105	1	1.2247e-08	0	2.99963	1	1		0.342786		1		0.000483578		0.973916	0.0213174	0.00448315	1.33304	TRUE
TFAM	5		0.0601263	0	0.273575	1	1		2.00697		1		0.146465		1		0.0194534		0.894175	0.053857	0.0368058	1.02165	FALSE
TALDO1	44		0.0482651	0	0.238826	1	1		0.345477		1		0.055335		1		0.954326		0.448994	0.269278	0.148015	1.98718	FALSE
TAF10	43		9.7166e-11	0	0.42691	1	5.39176e-09	0	1.79992	1	1		0.496152		0	0	0.816969	1	0.644692	0.281396	0.064594	1.58456	FALSE
SVIL	11		0.00803777	0	0.627693	1	0	0	2.85689	1	0	0	1.10422	1	1		0.715668		0.566139	0.171036	0.107923	1.42661	TRUE
SUB1	37		0.000203369	0	0.503747	1	0	0.152516	2.90437	0.94	0.0063458	0	1.29432	1	0	0	0.933063	1	0.640786	0.243733	0.0974745	1.39621	TRUE
SSR4	97		0	0	0.452754	1	0	0	3.14803	1	0	0	1.27982	1	0	0	0.215221	1	0.831811	0.100049	0.0642335	1.14909	FALSE
SRSF7	25		6.94515e-06	0	0.346506	1	0.0112571	0.05642	1.62846	0.98	0.79114		1.09915		0	0	0.88346	1	0.481521	0.228068	0.162643	1.58476	FALSE
SRSF5	92		0	0	0.495184	1	1		2.41999		1		0.705529		1		0.0972159		0.910374	0.0384661	0.0341946	1.38274	FALSE
SRRM1	32		2.69947e-05	0	0.478934	1	0	0	2.32974	1	0	0	1.04171	1	0	0.0777165	0.703537	0.97	0.626326	0.15651	0.0588743	1.83039	FALSE
SPINK1	11		2.40662e-07	0	0.275993	1	1		2.06955		1		0.0229501		1		0.00211993		0.986723	0.0102906	0.00247978	0.177345	FALSE
SPCS3	14		8.48506e-06	0	0.759909	1	0	0	2.27027	1	0	0	1.01859	1	1		0.0185137		0.917678	0.0764213	0.00471224	1.45635	TRUE
SPATS2L	11		2.18742e-08	0	0.301548	1	0.720736		2.74405		1		0.144939		1		0.0733959		0.8688	0.0448856	0.0274311	1.19642	FALSE
SPARCL1	39		0	0	0.458313	1	0	0	2.62945	1	1		0.728372		1		0.64958		0.572682	0.098074	0.0917094	1.12464	FALSE
SOD2	25		2.7407e-13	0	0.215761	1	0	0	3.45212	1	1		0.748881		1		0.187304		0.567478	0.153892	0.113315	0.947046	FALSE
SOD1	58		0.000715152	0	0.3368	1	9.91741e-05	0	2.44035	1	3.62878e-08	0.131487	0.940231	0.95	0	0.124151	0.262236	0.95	0.626638	0.189152	0.107661	2.46424	FALSE
SNX6	42		6.10324e-12	0	0.398116	1	1		2.06683		0	0	0.764987	1	0.0133303	0	0.396312	1	0.659253	0.0924601	0.0634186	1.76646	FALSE
SNRPF	49		2.44906e-06	0	0.32065	1	0	0	2.42502	1	0	0	0.450928	1	0	0	0.894721	1	0.800496	0.0992094	0.0591453	1.31504	FALSE
SNRPB	19		1.54259e-05	0	0.575788	1	1		0.0568588		1		0.0866746		1		0.0946183		0.722911	0.159453	0.0658391	1.59309	TRUE
TPM2	28		0	0	1.51284	1	0	0	3.50076	1	0	0	2.86678	1	0	0	1.3413	1	0.714307	0.0808836	0.0620544	1.47146	TRUE
SNHG8	63		0	0	1.31022	1	0	0	2.34551	1	0	0	0.70819	1	1		0.395864		0.846606	0.129006	0.0215622	1.89708	TRUE
TPM4	38		9.54547e-11	0	0.382842	1	0	0	3.19223	1	0	0	1.26369	1	0	0	0.496687	1	0.603504	0.21617	0.0449438	1.65903	FALSE
TXNDC17	46		0	0	0.354012	1	0	0	2.6015	1	0	0	1.99133	1	0	0	0.899649	1	0.672841	0.235388	0.0458523	1.04542	FALSE
ZNF331	3		0.00285709	0	0.625045	1	0.000923318	0.402193	1.44911	0.82	0.451183		0.6287		0.582119		0.579675		0.530447	0.235421	0.132534	1.4285	TRUE
ZFAS1	100		0	0	0.558059	1	0	0	1.54919	1	0	0	0.784737	1	0	0	0.644684	1	0.649987	0.185546	0.0852247	1.03589	TRUE
ZFAND2A	6		0.0116578	0	0.319646	1	7.19303e-05	0	0.752691	1	1		0.263141		1		0.202911		0.429971	0.297949	0.221806	1.74551	FALSE
ZC3H15	28		0.00249021	0	0.399709	1	1		0.728499		1.84056e-07	0.0302685	2.15668	0.99	0.000125047	0	0.533278	1	0.670834	0.183357	0.111038	2.16144	FALSE
YWHAB	46		1.0456e-08	0	0.479566	1	0	0.05642	2.99551	0.98	1		1.29187		0	0	1.27578	1	0.529117	0.344364	0.0969353	1.68239	FALSE
YIF1A	23		0.00053448	0	0.394346	1	9.62694e-08	0	0.808507	1	1		0.714135		1		0.19438		0.710863	0.196198	0.0663187	2.21024	FALSE
YBX3	38		0	0	0.453413	1	0	0	3.02599	1	1		0.245058		0	0	0.951776	1	0.539571	0.127483	0.107425	1.35307	FALSE
YBX1	89		0	0	0.528253	1	0	0	2.77646	1	0	0	0.372465	1	0	0	0.719994	1	0.735397	0.0784946	0.0659386	1.29845	TRUE
YBEY	8		1.24406e-11	0	0.57755	1	3.34458e-07	0	1.06601	1	1		0.13826		1		0.475468		0.581048	0.190194	0.101028	2.36656	TRUE
XRN2	19		7.28809e-13	0	0.552337	1	1		1.7236		0	0.200444	1.24482	0.92	0.0465751	0.0282403	0.229166	0.99	0.646144	0.199221	0.0631373	1.51076	TRUE
WFDC2	18		0.0008185	0	0.351396	1	0	0	1.78561	1	5.06478e-09	0	0.190159	1	0	0	0.800752	1	0.645306	0.172809	0.118929	0.65042	FALSE
VWF	7		0.0767984	0	0.207503	1	1		2.65218		0	0	0.962479	1	1		0.0758913		0.436417	0.170306	0.145381	0.889533	FALSE
VSIG2	3		3.36619e-06	0	0.296368	1	1		1.9281		1		0.0436362		1		0.0374063		0.891713	0.0732842	0.0275917	0.256375	FALSE
VIM	104		0	0	0.250893	1	0	0	2.89462	1	0	0	1.0923	1	6.20478e-05	0	0.657338	1	0.519777	0.132657	0.101699	0.900903	FALSE
UXT	80		7.26479e-13	0	0.286475	1	0	0	1.69837	1	1		0.18789		0	0	0.481672	1	0.709601	0.173971	0.0721635	2.22571	FALSE
UVRAG	5		0.0151573	0	0.347336	1	0.000582367	0.439405	2.89516	0.8	3.25069e-07	0.221199	1.23567	0.91	1		0.174965		0.714122	0.188239	0.0709041	1.09968	FALSE
UQCRQ	42		2.45516e-10	0	0.369022	1	1.55833e-14	0	1.80537	1	1		0.12582		1		0.167702		0.5842	0.282247	0.110578	3.43602	FALSE
UQCRB	95		0	0	0.630619	1	0	0	3.43259	1	1		1.66591		0	0	0.42412	1	0.852061	0.130206	0.0153636	1.19718	TRUE
UQCR11	69		0	0	0.465226	1	1		2.40748		1		0.0620113		1		0.01516		0.957362	0.0290891	0.0124073	1.01567	FALSE
UBXN1	37		0.115737	0	0.244361	1	0.0679829	0.422938	3.63579	0.81	0.098223	0.448756	1.24237	0.8	1		0.107684		0.713285	0.253191	0.0150783	0.993621	FALSE
UBL5	97		0	0	0.403266	1	0	0	2.91166	1	0	0	0.8789	1	0	0	0.744136	1	0.726416	0.178802	0.0600044	0.700461	FALSE
UBE2D2	40		3.75892e-08	0	0.350811	1	0	0.944796	1.9698	0.53	1		1.14572		1		0.17532		0.464045	0.266087	0.124818	1.21327	FALSE
UBA52	149		0	0	0.263512	1	1		2.81407		0	0	1.77674	1	0	0	1.51157	1	0.645657	0.21915	0.0951215	0.397973	FALSE
TYMP	42		1.90385e-10	0	0.237905	1	1		1.2789		1		0.691591		1		0.0605409		0.541179	0.366975	0.0447463	0.911425	FALSE
TXN	86		0	0	0.304326	1	0	0	3.43855	1	0	0	1.24514	1	0	0	1.01707	1	0.788963	0.15536	0.0398741	1.43044	FALSE
TXNIP	122		0	0	0.242645	1	1		1.45192		1		0.776963		1		0.077095		0.275141	0.132489	0.0678563	0.847976	FALSE
TXNDC5	5		3.01621e-07	0	0.477135	1	1		1.3029		0.0122579	0.0576358	0.379408	0.98	0.0726932	0.965872	0.192553	0.48	0.668485	0.143835	0.113745	0	FALSE
TPT1	153		0	0	0.278835	1	0	0	5.57175	1	0	0	2.02457	1	2.01102e-06	0	1.43769	1	0.734471	0.0769138	0.0460159	0.588575	FALSE
LY96	24		2.71794e-13	0	0.281115	1	0.921695		2.29371		0	0.0302685	1.04134	0.99	0	0	0.669448	1	0.613698	0.23734	0.0672658	1.16393	FALSE
SNHG6	91		0	0	0.369393	1	0	0	1.45297	1	9.08254e-12	0	0.687971	1	0	0	0.46863	1	0.589108	0.309098	0.0634176	1.78006	FALSE
SNCG	10		0.00911062	0	0.139356	1	0.000111724	0.152516	0.861973	0.94	7.1458e-16	0	1.46015	1	3.13684e-08	0	0.423069	1	0.429272	0.344491	0.14026	0.576211	FALSE
RPS2	149		0	0	0.208125	1	1		0.981657		1		0.111069		0	0	5.63757	1	0.278781	0.200509	0.153013	0.396526	FALSE
RPS28	138		0	0	0.346732	1	0	0	2.77872	1	1		0.0534961		0	0	0.323345	1	0.951806	0.0429885	0.00477828	0.884365	FALSE
RPS27	148		0	0	0.839547	1	1		1.98074		0.103376	0	0.206981	1	1		0.0262528		0.980591	0.0106303	0.0070985	1.38074	TRUE
RPS27A	150		0	0	0.52884	1	0	0	3.94382	1	0	0	1.26326	1	0	0	1.43468	1	0.671803	0.114555	0.0450151	0.609893	TRUE
RPS26	143		0	0	0.275502	1	1		0.0521603		1		1.47692		1		0.00933088		0.720194	0.270627	0.00750043	0.494534	FALSE
RPS24	139		0	0	1.57543	1	0	0	1.6004	1	0	0	1.84515	1	0	0	1.67447	1	0.455971	0.263185	0.19487	1.39723	TRUE
RPS23	147		0	0	0.206109	1	0	0	6.32198	1	0	0	0.203355	1	0	0	0.358826	1	0.393064	0.195316	0.162392	0.35654	FALSE
RPS21	146		0	0	0.345179	1	0	0	2.91086	1	0	0	0.628521	1	0	0	0.0511136	1	0.949863	0.0268893	0.010274	0.47899	FALSE
RPS20	144		0	0	0.132868	1	0	0	2.99744	1	0	0	1.24413	1	0.0327104	0	0.112772	1	0.78835	0.107407	0.085887	0.317982	FALSE
RPS19	147		0	0	0.688971	1	0	0	4.43663	1	0	0	1.37073	1	0	0	1.60267	1	0.669222	0.0935453	0.0595857	0.512724	TRUE
RPS16	150		0	0	0.330045	1	0	0	3.18267	1	1		1.45468		1		0.0104051		0.923403	0.0391735	0.00801923	0.590287	FALSE
RPS15A	152		0	0	0.15357	1	0	0	5.08975	1	0	0	1.97801	1	1		0.155548		0.876003	0.0882014	0.0273607	0.382469	FALSE
RPS14	152		0	0	0.38785	1	0	0	9.76541	1	0	0	2.73028	1	0	0	1.28466	1	0.787264	0.177956	0.00981912	0.501504	FALSE
RPS13	150		0	0	0.235069	1	0	0	2.69566	1	1		0.0303627		1		0.0804015		0.601727	0.167016	0.134593	1.18409	FALSE
RPS12	153		0	0	0.161008	1	0	0	12.9986	1	0	0	4.29511	1	0	0	12.6424	1	0.727712	0.176263	0.028503	0.535304	FALSE
RPS11	148		0	0	0.272504	1	0	0	3.46052	1	1		0.032228		1		0.106616		0.641761	0.0847439	0.0457759	0.727184	FALSE
RPS10	118		0	0	0.481831	1	0	0	4.37496	1	0	0	1.25638	1	1		0.1938		0.48031	0.175661	0.12735	1.01338	FALSE
RPN2	30		7.66816e-13	0	0.408433	1	0.709451		2.73091		0	0.0302685	0.697482	0.99	0	0	0.56714	1	0.821842	0.0850572	0.041629	1.48876	FALSE
RPLP2	149		0	0	0.318458	1	0	0	5.76402	1	0	0	1.35958	1	0.0316742	0	0.0829507	1	0.932041	0.0508556	0.0107739	0.594503	FALSE
RPLP1	153		0	0	0.217999	1	1		2.86527		1		0.278828		1		0.0742365		0.909289	0.033823	0.0249016	0.245374	FALSE
RPLP0	63		0	0	0.504744	1	0	0	3.15052	1	1		0.340605		1		0.0794151		0.561334	0.154769	0.105983	1.76707	TRUE
RPL7	121		0	0	0.308358	1	1		1.76235		1		0.322626		1		0.0914854		0.427531	0.325569	0.213362	0.639168	FALSE
RPL7A	151		0	0	0.24707	1	0	0	9.78883	1	0	0	3.16607	1	0	0	1.25772	1	0.65204	0.220448	0.0480957	0.343978	FALSE
RPL6	148		0	0	0.227874	1	1		0.478971		1		2.29198		0	0	0.330841	1	0.332295	0.20419	0.0515608	0.620017	FALSE
RPL5	142		0	0	0.197468	1	0	0	3.47979	1	0	0	2.81441	1	0	0	1.72452	1	0.337691	0.198904	0.0749472	1.13204	FALSE
RPL4	63		1.0102e-06	0	0.270917	1	0	0	0.547691	1	0	0	1.60647	1	0	0	0.509393	1	0.299229	0.186552	0.0913834	2.01894	FALSE
RPL41	81		0	0	0.364221	1	1		2.0015		1		0.181185		1		0.191737		0.951271	0.0341512	0.0107596	1.41171	FALSE
RPS3	146		0	0	0.291551	1	0	0	7.3835	1	0	0	4.22771	1	0	0	1.44376	1	0.72472	0.131104	0.0581501	1.21589	FALSE
SNHG5	51		2.21858e-11	0	0.478584	1	0	0	1.74709	1	1.75277e-12	0	1.29674	1	1		0.467949		0.475577	0.232808	0.130306	1.71825	FALSE
RPS5	145		0	0	0.428987	1	0	0	3.13415	1	1		0.140331		0	0	4.92102	1	0.657685	0.167959	0.0836264	0.690901	FALSE
RPS7	137		0	0	0.455919	1	0	0	5.14464	1	0	0	1.70463	1	0	0	0.415856	1	0.821394	0.113653	0.0146487	2.03689	FALSE
SMIM25	3		0.125372	0	0.440777	1	0	0	1.6701	1	1.74675e-14	0	1.43314	1	1		0.706039		0.534691	0.350066	0.100934	0.435099	FALSE
SMIM22	13		0	0	0.554081	1	0.00648715	0	1.72522	1	0.00401782	0.672821	0.671884	0.68	1		0.0654149		0.803866	0.176405	0.0144158	1.15528	TRUE
SMAP2	46		0	0	0.411637	1	1		2.23711		1		0.213731		1		0.00976694		0.762367	0.122834	0.039145	1.16745	FALSE
SLMO2-ATP5E	118		0	0	0.312751	1	1		1.49876		1		0.00416952		1		0.00184902		0.921632	0.073179	0.00518853	0.730835	FALSE
SLIRP	33		9.63196e-10	0	0.503452	1	9.88421e-07	0.02933	2.77166	0.99	0.000607069	0	1.29986	1	1		0.0663328		0.909865	0.0751719	0.0133648	0.706599	TRUE
SKP1	21		0	0	0.633891	1	4.66491e-16	0	2.62843	1	0.21161		0.396248		1		0.175995		0.626256	0.191448	0.061023	2.26725	TRUE
SIVA1	22		1.24086e-09	0	0.502139	1	0	0	2.5243	1	1		0.131702		0.032507	0	0.401195	1	0.765247	0.207797	0.0174535	1.2212	TRUE
SFPQ	26		0.0234414	0	0.336926	1	0.00146351	0	3.10781	1	1.72252e-09	0	1.19826	1	0.992235		0.706079		0.360426	0.222095	0.142988	1.81421	FALSE
SERPING1	6		0.0520081	0	0.194592	1	0.145506		2.13615		7.96348e-05	0.0302685	0.641166	0.99	0	0	0.469254	1	0.750889	0.0785989	0.0759271	0.762423	FALSE
SERF2-C15ORF63	61		1.95347e-05	0	0.262473	1	1		2.12579		1		0.0176439		1		0.0882407		0.853818	0.076297	0.0380764	1.03576	FALSE
SEPTIN7	77		0	0	0.511703	1	0	0	2.7488	1	1		0.488323		0	0.0282403	0.656964	0.99	0.661485	0.101591	0.0742993	1.45264	TRUE
SEM1	55		0	0	0.478026	1	1		1.9468		1		0.00997721		1		0.00181212		0.955083	0.0372093	0.0057799	0.978627	FALSE
SELENOH	62		1.56324e-06	0	0.390968	1	1		1.20773		1		0.240084		1		0.342903		0.674661	0.199755	0.0807053	2.39953	FALSE
SEC62	58		0.000935393	0	0.34487	1	1		1.95838		1		0.376411		1		0.217117		0.784279	0.0682981	0.0551379	1.78102	FALSE
SEC61G	59		0	0	0.548019	1	0	0	2.61622	1	0	0	0.96804	1	0	0	0.535331	1	0.792249	0.13985	0.0522399	1.22968	TRUE
SAT1	62		0	0	0.335296	1	1		1.36211		1		0.320023		1		0.0187428		0.745969	0.185145	0.020087	1.19271	FALSE
SAA2	7		5.22401e-07	0	0.584719	1	3.44912e-06	0	0.506381	1	1		7.84958e-17		1		3.61237e-17		1	4.16053e-32	3.62663e-34	0.983551	TRUE
SAA1	11		0	0	0.999534	1	0	0	0.89401	1	1		2.59813e-16		1		1.94521e-17		1	5.09661e-32	6.96e-62	0.720256	TRUE
S100A9	21		0	0	0.688294	1	0	0	8.44519	1	0.0504726	0	0.0892995	1	1		0.0305605		0.558187	0.106674	0.0473543	2.77636	TRUE
S100A8	32		0	0	0.413666	1	1		3.6855		1		0.865604		1		0.0385309		0.849514	0.128529	0.00892698	1.535	FALSE
S100A6	111		0	0	0.231832	1	0	0	2.15239	1	0	0	0.516526	1	1		0.00715254		0.473626	0.222448	0.0742718	0.986497	FALSE
S100A13	19		3.85873e-14	0	0.262235	1	1		0.393847		1		0.193901		1		0.194034		0.748065	0.207158	0.016881	1.37618	FALSE
S100A11	49		2.47273e-08	0	0.140152	1	0	0	4.67197	1	1		1.1994		0.239951		0.465867		0.403779	0.278736	0.222663	0.649781	FALSE
RWDD1	32		0	0	0.65448	1	0.0172695	0.152516	1.7037	0.94	0	0	1.5483	1	0.155817	0.0282403	0.221441	0.99	0.508296	0.342086	0.0709061	1.6113	TRUE
RSRC2	18		0.0907519	0	0.432621	1	0.00467998	0.02933	1.74905	0.99	0.000543949	0.0827523	0.695918	0.97	0.243484		0.548683		0.336825	0.183194	0.151261	1.84583	FALSE
RPSA	139		0	0	0.137238	1	0	0	2.79738	1	0	0	1.97457	1	0	0	1.53181	1	0.370134	0.211052	0.174445	0.453628	FALSE
RPS8	148		1.13794e-08	0	0.0718505	1	0	0	5.26464	1	0	0	4.67293	1	0	0	0.952949	1	0.62997	0.240947	0.03815	0.469924	FALSE
RPS6	148		0	0	0.296087	1	0	0	5.30472	1	0	0	2.29052	1	0	0	0.746135	1	0.617477	0.122608	0.112731	0.514507	FALSE
LY75-CD302	15		0.0548741	0	0.184935	1	0	0.0824651	2.63383	0.97	0	0.221199	1.30383	0.91	1		0.170483		0.720702	0.160681	0.0514839	0.603101	FALSE
NDUFB10	63		0.0415211	0	0.366215	1	1		1.36814		1		0.0605479		1		0.177842		0.655571	0.163519	0.088119	1.08322	FALSE
LTBP1	2		0.00132625	0	0.759888	1	0.00467685	0	1.43086	1	0.00238901	0	0.935912	1	0.719909		0.105568		0.683874	0.163993	0.0771166	1.00901	TRUE
CST3	58		0	0	0.245421	1	0	0	3.27627	1	0	0	0.619249	1	1		0.0178258		0.634471	0.222397	0.0421027	1.57101	FALSE
CSRP2	11		0	0	0.970183	1	0.594862		2.49468		0.710162		0.329512		5.07121e-15	0.278028	0.452607	0.88	0.872255	0.0479728	0.0400442	1.00241	TRUE
CRIP1	89		0.000444681	0	0.202746	1	0	0	3.19132	1	0	0	1.32732	1	1		0.01337		0.913699	0.0686386	0.010341	0.692527	FALSE
CPVL	21		0.0026381	0	0.305393	1	1		2.19109		1		1.06902		3.86223e-09	0	1.72781	1	0.439653	0.262328	0.151238	2.06097	FALSE
COX7C	67		0	0	0.37065	1	0	0	2.31858	1	1		0.049085		1		0.0302984		0.761857	0.173282	0.0458387	2.97128	FALSE
COX6C	98		0	0	0.233943	1	0	0	4.36626	1	0	0.0302685	0.568237	0.99	0	0	0.648624	1	0.900835	0.0498104	0.032131	0.477389	FALSE
COX6B1	93		0.0885416	0	0.145959	1	0	0	3.95567	1	0	0	1.34544	1	1		0.0134851		0.830463	0.145992	0.00985662	0.7374	FALSE
COX5B	94		0	0	0.538402	1	0	0	3.38094	1	0	0	1.22953	1	1		0.0229588		0.855715	0.0992192	0.0423036	1.12811	TRUE
COX4I1	108		0	0	0.53075	1	0	0	3.03073	1	0	0	0.460779	1	1		0.0550368		0.944186	0.0161031	0.00863936	0.993736	TRUE
COPE	67		5.61854e-05	0	0.299865	1	0	0	2.60138	1	0.0028742	0	0.999527	1	0.261715		0.355217		0.8157	0.104807	0.0289515	1.10404	FALSE
COMMD6	60		6.26448e-06	0	0.220641	1	0	0	2.21699	1	1		0.0689144		1		0.0456869		0.614947	0.143936	0.119636	1.64865	FALSE
COL6A3	6		0	0	0.547207	1	3.67809e-05	0.0824651	2.55162	0.97	0	0	0.713026	1	8.86879e-07	0	0.226641	1	0.585537	0.110928	0.0708643	1.33746	TRUE
CLU	42		0	0	0.794993	1	0	0	3.36418	1	0	0	1.43874	1	1		0.108182		0.783738	0.113976	0.0182483	1.34458	TRUE
CKLF-CMTM1	27		3.78914e-09	0	0.380417	1	0	0	1.95411	1	6.15341e-07	0	1.36091	1	0.082249	0.278028	0.447113	0.88	0.5904	0.31501	0.0573331	1.48767	FALSE
CIRBP	40		0	0	0.529205	1	0	0	2.27964	1	0	0	1.88208	1	1		0.437692		0.585803	0.20944	0.0720299	1.60612	TRUE
CIB1	31		0.00050282	0	0.174297	1	1		1.63405		1		0.135356		1		0.0363668		0.598529	0.343207	0.0301334	0.737744	FALSE
CIAO2B	32		0.0461885	0	0.293852	1	0	0.02933	2.28867	0.99	0	0.0827523	0.909678	0.97	1		0.0570421		0.771812	0.158083	0.0399757	0.921538	FALSE
CHD2	13		1.86639e-14	0	0.893878	1	0.000281366	0.19659	1.68905	0.92	1		0.545989		0.000730909	0.0282403	0.795491	0.99	0.443688	0.191592	0.106675	2.44174	TRUE
CHCHD2	67		0	0	0.315079	1	0	0	2.99888	1	1		0.127742		0.229564		0.0938347		0.879312	0.0925596	0.0171418	1.07361	FALSE
CFH	6		0.000489188	0	0.444912	1	3.08831e-10	0	2.40471	1	2.15639e-14	0	0.507368	1	1		0.197287		0.771527	0.0764458	0.0652184	0.303648	FALSE
CD74	27		1.14923e-06	0	0.363291	1	0	0	2.34936	1	0	0	0.568417	1	1		0.0364827		0.481681	0.0552452	0.0318341	1.66647	FALSE
CD69	24		3.55195e-12	0	0.569962	1	1		0.382612		0	0	1.60337	1	0	0	0.363236	1	0.555689	0.254398	0.0764082	1.05907	TRUE
CD63	121		0	0	0.347782	1	0	0	1.66699	1	0	0	2.02678	1	0	0	1.38839	1	0.406489	0.238829	0.156975	1.27181	FALSE
CD55	20		1.13343e-08	0	0.938419	1	5.07121e-15	0	2.41327	1	0	0	0.877466	1	0	0	0.717161	1	0.608188	0.116533	0.111019	3.08456	TRUE
CD47	24		0	0	0.596449	1	0.220765		1.94576		0	0	1.34086	1	0	0	0.274693	1	0.589765	0.266016	0.0461568	1.81194	TRUE
CTSB	5		0.00277456	0	0.343584	1	0.0152058	0.02933	1.77357	0.99	1		0.500677		0.977682		0.35359		0.462195	0.155913	0.0744775	0.47822	FALSE
CD3D	29		0	0	0.391566	1	0	0	1.61913	1	0	0	1.1562	1	0.0117377	0	0.301613	1	0.575195	0.177177	0.152605	2.51197	FALSE
CTSL	4		4.17503e-12	0	1.18813	1	3.42023e-09	0	1.70949	1	0.00203681	0.0576358	0.795647	0.98	0.00713479	0.0777165	0.450976	0.97	0.736207	0.15199	0.0949523	1.3266	TRUE
CYBA	90		0	0	0.422172	1	0	0	3.62707	1	0	0	1.35125	1	1		0.238592		0.718193	0.171253	0.0671244	1.40651	FALSE
EZR	28		0.00341669	0	0.399201	1	1		2.33506		8.10933e-08	0	1.0763	1	0.00593265	0.869057	0.581888	0.58	0.705262	0.118569	0.0659741	1.46274	FALSE
ERLEC1	17		1.1126e-11	0	0.315616	1	0	0	2.66219	1	0	0	0.990402	1	2.98682e-06	0	0.41757	1	0.813052	0.0998886	0.0403262	1.24489	FALSE
ERCC1	20		9.29133e-05	0	0.45385	1	0.0019925	0.02933	1.64296	0.99	1.27334e-06	0	1.57434	1	1		0.290426		0.547418	0.320517	0.046166	1.68759	FALSE
EPS8	13		0.00042897	0	0.302081	1	1		1.72408		1		0.701722		0.679448		0.210097		0.593066	0.232889	0.0439419	0.985368	FALSE
ENY2	27		0.000110919	0	0.478644	1	0	0.363692	2.2859	0.84	1		0.59153		1		0.359789		0.570288	0.198842	0.152532	1.21496	FALSE
EMP3	49		0	0	0.377389	1	0	0	2.2516	1	0.508962		0.26102		1		0.0752707		0.671184	0.143247	0.0815418	4.39261	FALSE
EIF5	45		0	0	0.338396	1	0	0	1.91321	1	1		0.0078114		1		0.154893		0.670268	0.109307	0.0817394	2.28841	FALSE
EIF3M	64		0	0	0.620295	1	0	0	2.35266	1	0	0	0.802504	1	0	0	0.546451	1	0.664099	0.120522	0.0842551	1.64922	TRUE
EIF3K	123		0	0	0.198906	1	0	0	2.865	1	0.0116987	0	0.916741	1	0	0	0.707874	1	0.886398	0.0512082	0.0327118	0.723519	FALSE
EIF3F	63		0	0	0.344724	1	1		0.230211		1		1.75973		1		0.00241903		0.603297	0.359966	0.0329966	0.874173	FALSE
EIF1	142		0	0	0.37303	1	0.307964		4.36846		4.33342e-06	0	1.56957	1	1		0.113456		0.660344	0.30899	0.00601376	0.777577	FALSE
EEF1G	126		0	0	0.234	1	1		2.61746		1		0.636393		1		0.0544426		0.304435	0.177067	0.134146	1.20107	FALSE
EEF1B2	131		0	0	0.518081	1	0	0	6.6122	1	0	0	1.40658	1	1		0.022723		0.907275	0.073364	0.00675783	2.25725	TRUE
EDF1	78		0	0	0.625933	1	1		2.03018		0	0	0.965971	1	1		0.0119478		0.905762	0.0794672	0.00728313	1.01209	TRUE
ECSCR	7		0.000489188	0	0.187592	1	0.780422		0.512903		1		0.373701		1		0.215879		0.659581	0.228316	0.0600971	0.412901	FALSE
ECI1	14		7.91917e-09	0	0.252081	1	0	0.02933	2.23677	0.99	1		0.0940625		1		0.115364		0.802413	0.169033	0.0237713	7.07043	FALSE
DRAP1	52		0	0	0.483583	1	0	0	2.08918	1	0	0	0.451743	1	1		0.00167606		0.970065	0.0247751	0.00235763	1.27407	FALSE
DNMT1	16		0.00389852	0	0.377855	1	0.00141966	0.383473	2.52693	0.83	0.000523687	0.0302685	1.1051	0.99	0.450963		0.380685		0.446004	0.1947	0.0939561	1.64193	FALSE
DNAJC1	26		0	0	1.01334	1	1.04357e-13	0	2.23841	1	1.73331e-13	0	0.701231	1	1		0.104048		0.85458	0.0470654	0.0419808	2.19684	TRUE
LUC7L3	24		6.03702e-09	0	0.591195	1	1		2.5031		0	0	0.556366	1	0.0316092	0.25758	0.287125	0.89	0.737176	0.110843	0.0456643	2.03052	TRUE
DNAJA1	35		0.0227477	0	0.249372	1	0	0	2.28562	1	0.00428834	0	0.564042	1	0	0	0.594432	1	0.577466	0.118489	0.0960588	0.873332	FALSE
DEK	52		9.04153e-06	0	0.324783	1	0	0	3.54573	1	1		1.30986		1.78258e-06	0.0532794	0.828575	0.98	0.684089	0.213133	0.0766414	1.6045	FALSE
DECR1	33		9.84411e-05	0	0.560364	1	0.00021595	0	1.87696	1	0.107541	0	0.922663	1	0	0.514762	0.866035	0.77	0.522531	0.277374	0.118867	1.62995	TRUE
DCN	19		0	0	0.196098	1	0	0	2.90951	1	0	0	1.2393	1	0	0	0.963293	1	0.556305	0.170418	0.076866	0.731007	FALSE
DBI	37		2.25691e-10	0	0.481713	1	0	0	3.46697	1	0	0	1.23691	1	1		0.0978266		0.775424	0.167787	0.0407092	1.95418	FALSE
CTSS	20		0.0570288	0	0.168282	1	0	0	4.24345	1	0	0	1.69988	1	7.90447e-09	0	0.687453	1	0.696096	0.242318	0.0216589	1.55142	FALSE
FABP1	7		1.83405e-09	0	0.196347	1	0.118396	0	3.65736	1	0.0188372	0.0302685	0.662384	0.99	1		0.0514533		0.958806	0.0177396	0.00763841	0.28599	FALSE
CD163	25		4.69495e-05	0	0.20259	1	0	0	3.29935	1	0	0	0.998747	1	0	0	0.685428	1	0.542786	0.0836823	0.0756495	0.930648	FALSE
CCNL1	26		3.40737e-05	0	1.06246	1	1		1.59903		2.03041e-06	0.107062	0.943811	0.96	0.101421	0	1.7064	1	0.485709	0.181721	0.172535	3.10832	TRUE
ASPH	16		3.41669e-11	0	0.444974	1	0	0	1.98351	1	7.19845e-12	0	0.654475	1	0.179438	0	0.304054	1	0.415649	0.115571	0.0934056	2.05173	FALSE
ARPC3	57		9.84411e-05	0	0.352906	1	1		2.26803		0	0	1.6308	1	1		0.774043		0.59468	0.163538	0.120181	1.98933	FALSE
ARPC2	75		0	0	0.606804	1	1		2.55421		1		0.322229		1		0.0237102		0.7293	0.083823	0.0491445	1.83754	TRUE
ARL6IP1	59		0	0	0.611856	1	0	0	3.28788	1	0	0	1.52309	1	1		0.343185		0.71382	0.172976	0.0573048	3.19981	TRUE
ARID5B	57		0	0	0.373993	1	3.29499e-09	0	3.0806	1	0	0	1.3814	1	0	0	1.71787	1	0.717582	0.132459	0.0700979	1.71074	FALSE
ARHGAP18	8		2.67969e-07	0	0.445965	1	1		2.58147		0.0585351	0.656385	0.64113	0.69	0.00191663	0.0777165	0.327985	0.97	0.69278	0.0867135	0.0698842	1.7712	FALSE
ARF4	3		0.0689005	0	0.474024	1	0.0311208	0.98	1.93202	0.51	7.28399e-05	0.0576358	0.478282	0.98	1		0.093029		0.657581	0.233049	0.0767698	1.93297	FALSE
AREG	64		0	0	0.468336	1	0	0	4.64192	1	0	0	1.47539	1	0	0	1.33798	1	0.742222	0.166468	0.0754685	1.19861	FALSE
APRT	22		5.96043e-05	0	0.34346	1	1		0.118067		0.0480768	0	0.248223	1	0	0	0.291055	1	0.535619	0.298931	0.160152	1.19844	FALSE
APOE	3		0	0	1.51568	1	0	0	1.90005	1	0	0	1.09687	1	0	0	2.28178	1	0.156273	0.121615	0.0883135	0.476477	FALSE
APOD	5		0	0	0.325246	1	1		2.45003		1		0.0740858		1		0.227448		0.556487	0.0494092	0.0465969	0.62482	FALSE
APLP2	37		0	0	0.389499	1	0	0	2.52822	1	0	0	1.02363	1	1		0.239621		0.484052	0.206455	0.132976	1.54857	FALSE
ANXA5	21		1.44227e-14	0	0.403195	1	0	0	3.48859	1	1.68571e-06	0.0302685	0.632768	0.99	3.64184e-05	0.0777165	0.675673	0.97	0.728299	0.0722448	0.0596957	1.27721	FALSE
ANXA1	45		0	0	0.905288	1	0	0	2.31442	1	0	0	1.89198	1	0	0	0.870656	1	0.511422	0.192818	0.100943	3.42011	TRUE
ALDOA	44		0	0	0.309207	1	0	0	1.41238	1	1		0.0170609		1		0.148738		0.258211	0.191834	0.148277	1.61086	FALSE
AKR1C3	23		0.00206698	0	0.168525	1	1		0.978794		1		1.03962		1		0.640175		0.629269	0.23697	0.106308	1.21684	FALSE
AKAP9	5		6.58936e-06	0	0.853277	1	1		1.4104		5.76657e-14	0	1.26315	1	0.00798808	0.0532794	0.864876	0.98	0.408207	0.178973	0.116054	1.9641	TRUE
AKAP13	13		8.7627e-08	0	0.309785	1	1		2.29674		1		0.561208		0	0	0.636965	1	0.498569	0.132082	0.0708926	1.39825	FALSE
AGR2	21		1.30403e-14	0	0.204486	1	1		2.27953		1		0.0227784		1		0.0638506		0.945203	0.0231952	0.0124454	0.854304	FALSE
ADSL	6		3.93586e-09	0	0.898475	1	3.04267e-09	0.0824651	1.54172	0.97	1		0.732166		0.00379339	0.124151	0.378647	0.95	0.629482	0.2892	0.0389118	2.97818	TRUE
ADK	2		0.001601	0	0.649654	1	1		1.01126		1		0.241383		1		0.751991		0.503284	0.198169	0.176623	2.11088	TRUE
ADIRF	42		0	0	0.520575	1	1		1.40204		2.36388e-06	0	0.790192	1	1		0.0199061		0.806307	0.162089	0.0235334	1.10318	TRUE
ACTG2	5		3.18346e-06	0	0.142659	1	6.08967e-09	0.02933	2.39314	0.99	0	0	2.19641	1	0.55716		0.131344		0.695635	0.3039	0.000464922	0.657416	FALSE
ACTB	61		0.000660283	0	0.464031	1	0	0.890548	2.09631	0.56	0	0.0576358	0.717324	0.98	1		0.0313655		0.624301	0.165387	0.0274814	1.51942	FALSE
ACTA2	11		0.015041	0	0.337406	1	0	0	4.25425	1	1		0.506844		1		0.333294		0.288275	0.123687	0.069984	0.961423	FALSE
ATF3	16		1.13778e-11	0	0.400898	1	0	0	2.86729	1	0	0	0.685888	1	1		0.190982		0.848524	0.0619519	0.041346	0.927459	FALSE
CCT4	24		0	0	0.869969	1	2.53736e-05	0	1.64738	1	1		0.663662		9.91904e-11	0	0.713462	1	0.52872	0.190819	0.145843	1.81517	TRUE
ATP5F1B	35		0	0	0.233739	1	0	0	3.88898	1	1		0.0238801		1		0.0165867		0.957084	0.0184383	0.00885149	1.20606	FALSE
ATP5F1D	90		0	0	0.351834	1	1		1.90997		1		0.00579625		1		0.000853134		0.61752	0.145134	0.120836	0.625879	FALSE
CAST	88		0	0	0.370167	1	0	0	2.92419	1	0	0	1.62696	1	0	0	0.760119	1	0.483191	0.108645	0.0630292	1.33203	FALSE
CASP4	28		0	0	0.594771	1	1		2.55843		1		0.297908		1		0.0955534		0.81363	0.116991	0.0279588	0.935467	TRUE
CARD16	11		3.57585e-06	0	0.473493	1	5.87587e-06	0	1.11069	1	0.0558078	0.0576358	0.533789	0.98	1		0.281244		0.613875	0.222053	0.127818	1.2919	FALSE
CAPG	22		0.0596858	0	0.253899	1	0	0	3.82673	1	0	0	1.41105	1	1		0.763524		0.686659	0.125406	0.101694	1.12039	FALSE
CALM1	137		0	0	0.435181	1	0	0	5.43127	1	0	0	1.50009	1	1		0.0329948		0.87785	0.0932242	0.00916463	2.38632	FALSE
CALD1	19		0	0	0.20206	1	0	0	3.16252	1	0	0	1.26768	1	0	0	1.24378	1	0.465011	0.176761	0.117305	0.666635	FALSE
CA1	2		0.0278575	0	0.289021	1	4.55928e-07	0.05642	2.33071	0.98	1		0.336878		0.00247044	0	0.414575	1	0.710621	0.187933	0.0839249	0.152435	FALSE
C7	8		0.000258295	0	0.321805	1	1		0.243674		1		0.138292		0.0107798	0	1.08553	1	0.378341	0.282092	0.188357	1.05488	FALSE
C3	19		0	0	0.349622	1	1.04974e-11	0	3.15257	1	1		0.0860191		0.0726932	0	0.716154	1	0.323799	0.17499	0.122602	2.37396	FALSE
C1QB	3		0.00477387	0	0.374021	1	1.5192e-11	0.217992	2.16645	0.91	0.494312		0.539496		0.0146772	0.0282403	0.477584	0.99	0.441058	0.12189	0.0881328	0.182154	FALSE
C19orf33	23		0.00147921	0	0.242834	1	1.32531e-07	0.02933	0.829354	0.99	1		0.0745196		1		0.395858		0.667389	0.253156	0.0794547	0.729616	FALSE
C12orf57	48		0	0	0.55938	1	0	0	2.0605	1	1		0.388536		0.0133303	0	0.188277	1	0.898872	0.0641582	0.0300137	2.24183	TRUE
BLVRB	36		0	0	0.415006	1	0	0	2.50584	1	1		0.156688		0.207714	0	0.298585	1	0.78417	0.142682	0.0234618	1.01176	FALSE
BLOC1S1-RDH5	42		0	0	0.253454	1	1		4.91657		0.987901		1.48858		1		0.0531757		0.798981	0.178313	0.0177858	0.829278	FALSE
BCL2A1	5		6.79988e-12	0	0.379192	1	5.97931e-11	0	0.370222	1	0.00111035	0	0.134841	1	1		1.62825e-16		0.829591	0.170409	3.01825e-31	0.789498	FALSE
BAZ1A	21		1.28612e-09	0	0.557532	1	0	0	4.0712	1	3.02374e-13	0	1.22823	1	1		0.176388		0.550864	0.145399	0.102175	2.20427	TRUE
ATP5PO	83		0	0	0.483094	1	0	0	3.14857	1	0	0	1.31393	1	1		0.122389		0.819166	0.114126	0.0507284	1.46403	FALSE
ATP5PF	77		0.000305293	0	0.19054	1	1		0.0320208		1		1.19104		1		0.0570491		0.483331	0.249126	0.122547	0.428764	FALSE
ATP5PD	77		0	0	0.771004	1	0	0	2.14914	1	0	0	0.674723	1	0	0	0.454231	1	0.787318	0.11247	0.0464675	1.47154	TRUE
ATP5MPL	40		9.13109e-12	0	0.408864	1	1		2.7118		1		0.0204768		1		0.0513747		0.90882	0.0419354	0.0270594	1.38178	FALSE
ATP5MG	93		0	0	0.50712	1	0	0	3.88067	1	0	0	0.496079	1	1		0.0406838		0.974835	0.0091666	0.00715047	1.24414	TRUE
ATP5ME	25		0.00953243	0	0.200402	1	1		1.39392		1		0.0302064		1		0.0101912		0.878988	0.0987305	0.0222819	0.713977	FALSE
ATP5MD	81		0	0	0.343126	1	0.0124781	0	2.43392	1	0.326305		0.896225		1		0.0500981		0.921435	0.0568185	0.0130746	0.991497	FALSE
ATP5MC3	51		1.47613e-15	0	0.152182	1	0	0	4.5937	1	0	0	0.787214	1	0.413989		0.22013		0.511323	0.32715	0.0891473	1.17659	FALSE
ATP5MC1	34		0	0	0.43214	1	0	0	2.56118	1	0	0	1.4928	1	0	0.0532794	0.984061	0.98	0.565406	0.263471	0.160862	1.11475	FALSE
ATP5F1C	74		0	0	2.77078	1	0	0	3.93969	1	0	0	2.00212	1	0	0	1.13382	1	0.470709	0.353869	0.109229	3.11831	TRUE
FAM107B	3		0.0483609	0	0.27554	1	0.301876		1.11202		0.0130582	0.0576358	0.593168	0.98	1		0.517538		0.620298	0.137806	0.0901457	1.02841	FALSE
DNAJC15	52		2.6669e-05	0	0.273523	1	5.37695e-09	0.106968	3.9721	0.96	6.49336e-14	0.107062	1.29896	0.96	0	0.771596	0.577195	0.64	0.721395	0.207546	0.0412356	0.840832	FALSE
unknown_chrM_0	17		0	0	0.757707	1	0	0	1.51066	1	8.50388e-06	0	0.487754	1	1		0.329246		0.0985073	0.0697235	0.055973	2.5119	TRUE
HNRNPA2B1	77		0	0	0.481898	1	0	0	3.32082	1	0	0	0.973612	1	4.91805e-07	0	0.676149	1	0.610386	0.142445	0.0770074	2.04284	FALSE
KLRB1	33		8.8562e-09	0	0.327593	1	0	0	3.67021	1	0	0	0.862001	1	1		0.0710449		0.861678	0.111764	0.0230485	1.05351	FALSE
KMT2E	17		0.000737933	0	0.432804	1	5.49868e-05	0.217992	2.74228	0.91	1		0.743671		1.90823e-10	0.146766	0.834844	0.94	0.548617	0.128345	0.0882963	1.27105	FALSE
HNRNPA1	72		0	0	0.405673	1	0	0	1.80754	1	0	0	1.43278	1	0	0	0.394649	1	0.489379	0.314241	0.0809593	1.40546	FALSE
HINT1	39		0	0	0.456553	1	0	0	3.63351	1	0.000466913	0.221199	0.422309	0.91	1		0.0625501		0.975097	0.0127551	0.00498793	1.34238	FALSE
KRT13	2		0	0	0.357801	1	1		1.41854		1		0.0438917		1		0.00262541		0.911232	0.0594098	0.0166677	0.292294	FALSE
HERPUD1	5		0.000213194	0	0.414953	1	1		0.525576		0.00148049	0.156416	1.74687	0.94	1		0.221567		0.424379	0.410099	0.0912057	3.30841	FALSE
HCST	49		0	0	0.50131	1	0	0	2.2507	1	0	0	0.599277	1	2.39924e-05	0	0.291577	1	0.880348	0.0902225	0.0264152	1.46889	TRUE
HADHA	36		6.72735e-14	0	0.678503	1	6.52736e-08	0.239757	2.18458	0.9	3.29499e-06	0.4059	0.707311	0.82	0.0366825	0.553872	0.786842	0.75	0.535925	0.14597	0.124574	2.94907	TRUE
HACD4	3		0.001335	0	0.486929	1	0.569417		1.74382		0.0584963	0.221199	0.425134	0.91	1		0.355593		0.414243	0.279992	0.0924198	1.91613	FALSE
GZMA	22		8.82413e-13	0	0.517342	1	0.0123992	0.779792	2.62221	0.38	1		0.148658		3.57327e-10	0.40701	0.138983	0.82	0.916968	0.0499732	0.0264527	0.858112	TRUE
HSPH1	17		4.51167e-06	0	0.462842	1	0.0412543	0.304277	2.56868	0.87	0.00436724	0.107062	1.06084	0.96	1.5926e-09	0	0.587472	1	0.486708	0.162776	0.0789675	2.06897	FALSE
GTF3A	27		0	0	0.734963	1	0	0	2.1495	1	0.00515806	0.0827523	0.717204	0.97	0	0	0.6765	1	0.600753	0.139015	0.0965133	2.53583	TRUE
KRT15	2		8.92497e-06	0	0.413559	1	1		1.31495		4.23684e-05	0	0.379688	1	0	0	1.78494	1	0.334376	0.125312	0.122353	0.693656	FALSE
GSTP1	88		0	0	0.235168	1	0	0	3.13632	1	0	0	2.14941	1	0	0	1.4268	1	0.474932	0.307241	0.126021	2.03445	FALSE
KRT17	8		6.36087e-05	0	0.161904	1	0	0	2.32916	1	1		0.0218911		1		0.00224862		0.209432	0.0575763	0.0526248	0.384675	FALSE
GSTA1	10		0.0010144	0	0.269928	1	0	0	2.93817	1	0.934223		0.161139		5.32455e-09	0	0.266546	1	0.978111	0.0165374	0.00535149	0.511032	FALSE
ITM2B	90		0	0	0.698225	1	0	0	2.24958	1	1		0.991712		0	0	0.71869	1	0.659476	0.209651	0.0644257	1.72483	TRUE
HNRNPA3	32		0	0	0.650851	1	0	0	2.17392	1	9.12365e-15	0	1.3467	1	1		0.265391		0.520843	0.183266	0.141297	1.56973	TRUE
ITGB1	41		0	0	0.343712	1	1		2.5647		0.435016		0.617246		1		0.387987		0.621404	0.115102	0.0920308	1.76334	FALSE
HNRNPDL	48		0	0	0.616547	1	5.35409e-09	0	2.15462	1	0	0	1.12353	1	0	0	0.814689	1	0.536223	0.165869	0.128944	2.02312	TRUE
HSPE1-MOB4	84		0	0	0.215682	1	0	0	5.41663	1	2.83055e-07	0	1.10423	1	0	0	0.451328	1	0.769875	0.109086	0.0612006	0.519117	FALSE
IFI30	27		0	0	0.350179	1	0	0	2.57543	1	1.36662e-10	0	0.259237	1	0	0	0.880321	1	0.47218	0.106795	0.0947419	0.905741	FALSE
IFT57	9		0.0626587	0	0.47616	1	0.00984414	0.402193	2.02698	0.82	1.13195e-06	0.0302685	0.914959	0.99	1.00671e-11	0	1.93457	1	0.561347	0.140383	0.129841	1.17598	FALSE
IGSF6	7		0.000511182	0	0.224691	1	1		1.45939		1		0.527176		1		0.000924944		0.460531	0.373117	0.144551	1.27566	FALSE
FAM162A	17		0.0262349	0	0.277714	1	1		1.40247		1		0.940515		1		0.113319		0.61272	0.368841	0.0105338	1.15283	FALSE
IL1B	7		1.0969e-09	0	0.294549	1	1		0.19705		0.928399		1.67753		0	0.237545	0.568085	0.9	0.652183	0.29673	0.0431032	0.345942	FALSE
IL1R2	11		0.0656447	0	0.261027	1	0	0	2.83348	1	1		0.528685		1		0.182103		0.77731	0.101899	0.0486335	0.689897	FALSE
HSPB1	40		0	0	0.364453	1	1		1.98465		1		0.223539		1		0.0699138		0.39107	0.179618	0.0585034	1.62792	FALSE
KRT8	13		0	0	0.992216	1	0	0	2.30265	1	0.173352		0.334751		1		0.375646		0.401641	0.118877	0.106548	1.1669	TRUE
HSP90B1	61		0	0	0.248467	1	0	0	3.7866	1	0	0	1.54009	1	0	0	1.1086	1	0.641025	0.175985	0.0979965	2.16538	FALSE
IL7R	31		0	0	0.409481	1	0	0	3.04555	1	1		0.195234		1		0.168031		0.803464	0.111963	0.0487105	1.55849	FALSE
HSP90AA1	115		0	0	0.30813	1	0	0	3.06191	1	0	0	1.29145	1	1		0.0805895		0.496568	0.0728212	0.060934	0.725552	FALSE
IQGAP2	10		0.001645	0	0.500522	1	1.97903e-08	0.0824651	3.08878	0.97	0.00403093	0.107062	0.889105	0.96	1		0.184307		0.608368	0.124478	0.0967906	1.71448	TRUE
HPGD	15		5.23914e-12	0	0.350531	1	0	0	3.01162	1	0	0	1.05661	1	1		0.0718293		0.684605	0.12314	0.117142	0.801542	FALSE
IRF1	37		1.15142e-11	0	0.488814	1	0	0	2.41439	1	0	0	2.2883	1	0	0	0.893405	1	0.475602	0.40086	0.0646399	2.00697	FALSE
HP1BP3	13		0.00657223	0	0.751594	1	3.68873e-09	0	2.17623	1	6.46852e-12	0.107062	0.776445	0.96	3.06249e-15	0	1.28541	1	0.584208	0.147203	0.108775	1.83067	TRUE
ITGB1BP1	6		6.42173e-07	0	0.41192	1	0	0	1.96079	1	0	0	1.86858	1	1		0.117781		0.53347	0.319198	0.0537854	1.49252	FALSE
HNRNPD	29		5.15875e-06	0	0.608404	1	6.55032e-14	0	2.14134	1	0.000545148	0.656385	0.646449	0.69	8.60762e-06	0.0777165	0.655906	0.97	0.567913	0.186165	0.116849	2.81051	TRUE
HSP90AB1	111		0	0	0.315615	1	0	0	3.64106	1	0	0	3.47598	1	0	0	2.17803	1	0.435147	0.273531	0.125972	0.816617	FALSE
GSN	20		1.0383e-05	0	0.208354	1	0	0	1.7515	1	1		0.151851		1		0.195745		0.278228	0.105518	0.0784216	1.00864	FALSE
IFI16	17		0	0	0.476742	1	1		1.88218		8.5069e-14	0	1.03644	1	0	0	1.10476	1	0.594715	0.210452	0.0881997	1.63301	FALSE
FKBP5	39		1.66823e-06	0	0.448096	1	2.24131e-12	0.02933	3.04956	0.99	0	0.0302685	1.15259	0.99	1		0.594264		0.525922	0.122796	0.113702	1.16192	FALSE
FTH1	129		0	0	0.164744	1	0.224516		2.04357		0	0	13.424	1	0	0	2.10932	1	0.337127	0.18847	0.0898322	0.972641	FALSE
KTN1	20		0.00015069	0	0.402116	1	2.93527e-12	0	1.76726	1	8.02273e-07	0	0.708948	1	1		0.244174		0.366592	0.12387	0.094841	1.88593	FALSE
LRMDA	5		1.79641e-06	0	0.351555	1	0	0	1.83371	1	0	0	1.88121	1	1		0.0376417		0.583281	0.200158	0.0640445	0.425756	FALSE
LMO7	6		0	0	0.727637	1	0	0	2.05117	1	5.89198e-13	0	0.999077	1	1		0.535132		0.533321	0.190658	0.0763247	1.52185	TRUE
LCN2	12		0	0	0.195268	1	0	0	9.11994	1	1		0.33373		0.0891804	0	2.55899	1	0.573815	0.134208	0.0935999	1.21038	FALSE
FOS	71		0	0	0.395559	1	1		2.91042		0	0	1.08721	1	1		0.0134874		0.839786	0.123369	0.0153888	1.89923	FALSE
LIMCH1	3		0	0	1.4174	1	0	0	1.40793	1	0.973799		0.126524		1		0.0929277		0.841467	0.079782	0.0411509	0.492008	FALSE
LMNA	52		0	0	0.780114	1	0	0	2.49302	1	2.08269e-11	0	0.387342	1	0	0	1.0356	1	0.546723	0.131406	0.0899896	1.36486	TRUE
LGALS3	55		0	0	0.171982	1	0	0	0.526684	1	0	0	2.90504	1	1		0.0289732		0.584807	0.264664	0.116592	1.66582	FALSE
GPR183	7		0.000844829	0	0.317985	1	0.000419604	0	0.319263	1	1		0.0324203		1		1.25692e-16		0.845183	0.154817	1.45482e-31	1.36972	FALSE
FBP1	12		1.61545e-09	0	0.383963	1	0.0048298	0.106968	0.576232	0.96	0	0.0576358	1.4329	0.98	0	0	0.372562	1	0.757185	0.193266	0.0419507	1.69851	FALSE
LGALS4	11		0.120767	0	0.132035	1	0	0	5.01664	1	0.00452606	0.87553	0.738542	0.57	0.00173315	0.0282403	0.473712	0.99	0.631051	0.171968	0.075851	0.32499	FALSE
FCER1G	17		3.08958e-06	0	0.398761	1	0	0.05642	1.89753	0.98	1		0.16251		1		0.23862		0.681259	0.308017	0.00742983	1.74157	FALSE
LMAN1	25		1.56492e-11	0	0.359619	1	1		2.06777		1		0.827517		1		0.0304668		0.710993	0.253178	0.026725	1.18425	FALSE
LGALS2	9		0.0026381	0	0.242227	1	0	0	1.776	1	8.29108e-05	0.0302685	0.965206	0.99	2.055e-15	0.0282403	0.234091	0.99	0.734747	0.213356	0.0436836	1.40501	FALSE
FYB1	21		0	0	1.15532	1	0	0	3.22623	1	0	0	2.15205	1	1		0.611186		0.327558	0.306211	0.0946733	2.02192	TRUE
FXYD3	22		0.00278888	0	0.153164	1	0	0	5.20488	1	0	0	2.10674	1	1		0.117435		0.683165	0.192412	0.071371	0.629559	FALSE
FCN3	6		0.000298568	0	0.542631	1	0	0	5.19651	1	1		0.0709873		1		0.14468		0.977914	0.0162659	0.00582042	0.959986	TRUE
GAPDH	104		0.1235	0	0.156785	1	0	0	4.51343	1	1		0.305623		1		0.179701		0.176934	0.0698764	0.062077	1.04506	FALSE
KRTCAP2	88		0	0	0.352611	1	1		2.34444		1		0.776104		1		0.518044		0.748686	0.213303	0.0224548	0.741376	FALSE
FAU	150		0	0	0.131685	1	0	0	2.42139	1	0	0	0.973444	1	0	0	0.254074	1	0.929104	0.0421086	0.0116481	0.192477	FALSE
GAS5	119		0	0	0.421184	1	0	0	2.45227	1	3.05444e-09	0	0.803475	1	0	0	0.698494	1	0.619157	0.140151	0.126923	1.58546	FALSE
LRRFIP2	10		0	0	0.784523	1	0	0	1.73594	1	0	0	1.92919	1	1.06151e-09	0	1.09752	1	0.409411	0.240479	0.120895	2.5901	TRUE
GNLY	24		0.00629966	0	0.120312	1	0	0	2.52289	1	0	0	1.48678	1	0	0	0.674613	1	0.644324	0.154379	0.0927122	0.801639	FALSE
GADD45B	32		0	0	0.392847	1	0.00178537	0.0824651	5.66517	0.97	0	0	2.05216	1	1		0.0467386		0.730078	0.212641	0.00705361	1.41283	FALSE
GMFG	79		6.23897e-12	0	0.313325	1	0	0	1.38972	1	1		0.381735		1		0.0212617		0.374621	0.168569	0.136216	1.64097	FALSE
NOSIP	11		0.00338827	0.0241991	0.177695	0.99	0.0296085	0.363692	0.906197	0.84	0	0.107062	2.32868	0.96	0.0315727	0.237545	0.330686	0.9	0.608944	0.383879	0.00518556	1.42935	FALSE
REEP3	7		3.2863e-06	0.0241991	0.498208	0.99	1		2.12976		0.000713851	0.585433	0.711702	0.73	5.68716e-12	0	0.534342	1	0.75555	0.108238	0.0597373	1.53061	FALSE
CALR	37		1.00287e-05	0.0241991	0.239064	0.99	0	0.175297	0.689194	0.93	0	0.386247	1.11148	0.83	1		0.016103		0.39457	0.348556	0.12521	1.36762	FALSE
IL1R1	8		0.05029	0.0241991	0.132934	0.99	0.000129756	0	1.95938	1	0	0	1.13242	1	1.39208e-10	0	0.608344	1	0.450239	0.167789	0.115967	1.13959	FALSE
CANX	26		0.0230093	0.0241991	0.394183	0.99	5.98584e-09	0	1.73362	1	1		0.536469		1		0.276758		0.640931	0.192236	0.0733645	1.03265	FALSE
IGF1	4		0.00832618	0.0241991	0.37827	0.99	1		0.085407		1		0.0454942		0.00437332	0	0.253362	1	0.686024	0.194283	0.0523217	0.844034	FALSE
HSPB11	18		0.0311226	0.0241991	0.42712	0.99	4.56169e-05	0	2.081	1	4.4559e-05	0.672821	0.513016	0.68	1		0.531077		0.814025	0.101376	0.074756	1.35363	FALSE
STXBP2	12		2.56948e-06	0.0241991	0.639769	0.99	0	0.02933	1.86722	0.99	0.987678		0.624682		1		0.0201048		0.743849	0.232895	0.013469	3.00476	TRUE
SRSF3	9		0.0311096	0.0241991	0.523938	0.99	0.000153207	0	2.05754	1	1		0.702794		6.59418e-06	0	0.473866	1	0.764761	0.158456	0.0495384	3.43568	TRUE
NUSAP1	7		0.0529044	0.0241991	0.352676	0.99	0.10951	0.646243	1.9696	0.69	0.0337229	0.708268	0.644728	0.66	1		0.196662		0.664415	0.112945	0.0915521	1.42538	FALSE
ZFAND5	17		7.64681e-05	0.0241991	0.339084	0.99	0.3638		2.17417		1.01004e-11	0.486373	1.35605	0.78	0.258224		0.672928		0.610739	0.223253	0.0960823	1.40743	FALSE
RPAIN	7		0.0247284	0.0241991	0.487842	0.99	0.000548336	0.175297	0.889994	0.93	0.0041921	0.0827523	0.574818	0.97	1		0.328196		0.35973	0.223631	0.184547	2.3518	FALSE
GPX3	5		0.0147473	0.0241991	0.158727	0.99	0.0574097	0.239757	1.89597	0.9	1.66654e-13	0.221199	0.339316	0.91	1		0.232815		0.323846	0.0665854	0.0537617	0.190788	FALSE
PAK2	26		0	0.0241991	0.674135	0.99	1.02097e-08	0	1.66533	1	1.69978e-05	0.94	0.454159	0.47	0.000104353	0.25758	0.484148	0.89	0.566611	0.165274	0.137379	2.94825	TRUE
PRRC2C	29		0.000669253	0.0241991	0.565069	0.99	0	0.175297	2.2539	0.93	0.000272492	0.302216	1.15377	0.87	0.040016	0	0.463746	1	0.424366	0.168546	0.133395	1.57447	TRUE
DAB2	12		0.000178324	0.0241991	0.738804	0.99	1		0.595716		1		0.0258941		0.292269		0.46909		0.320314	0.248035	0.109575	2.52594	TRUE
RPP30	5		0.0737082	0.0241991	0.803352	0.99	9.39041e-05	0.02933	2.50505	0.99	1		0.333504		1		0.0992684		0.838718	0.0638799	0.0466932	2.62505	TRUE
CTSC	9		3.75892e-08	0.0241991	0.817074	0.99	0.000125966	0	1.30965	1	1		0.386557		1		0.299325		0.568635	0.248073	0.0870598	1.27786	TRUE
DNAJC8	27		0.0171224	0.0241991	0.483763	0.99	0.390103		2.21797		0	0	1.11328	1	1		0.20933		0.712685	0.213102	0.0434035	1.88117	FALSE
GIHCG	3		0.121741	0.0241991	0.153226	0.99	0.208831		0.12724		0.0885877	0.0576358	0.190048	0.98	1		9.5591e-17		0.632474	0.367526	4.63335e-32	0.442394	FALSE
CSNK1A1	20		0.059926	0.0241991	0.273342	0.99	0.306608		2.02713		1		0.509432		1		0.11612		0.621905	0.100388	0.0566646	1.20009	FALSE
EBNA1BP2	8		0.0227228	0.0241991	0.715642	0.99	1.0497e-07	0.02933	1.78209	0.99	1		0.125843		0.126203	0.0532794	0.451268	0.98	0.834663	0.141242	0.0240951	1.2268	TRUE
NAA38	20		0.000947503	0.0241991	0.267022	0.99	0	0	1.69971	1	0.00990635	0.107062	0.270504	0.96	1		0.00169106		0.919937	0.0711614	0.00890131	0.961085	FALSE
UQCR10	23		0.0469649	0.0241991	0.500206	0.99	1		1.1838		0.724414		0.496215		1		0.181963		0.862789	0.104575	0.0326357	1.41708	TRUE
ASAH1	9		0.000700179	0.0241991	0.444207	0.99	0.172667		2.3528		1.2945e-06	0.131487	0.795599	0.95	1.49553e-09	0	0.70573	1	0.631856	0.163576	0.135392	3.2198	FALSE
COL14A1	8		0	0.0241991	0.408787	0.99	0	0.383473	4.33634	0.83	1		0.00902726		0	0.819872	0.590964	0.61	0.939746	0.0355738	0.0189634	0.779603	FALSE
FMC1-LUC7L2	5		0.000257597	0.0241991	0.562811	0.99	3.05111e-11	0.217992	2.12115	0.91	1		0.299603		0.719679		0.332945		0.747065	0.123072	0.0714049	2.35442	TRUE
ELF3	8		0.0752979	0.0241991	0.204213	0.99	0.706544		2.22559		1		0.650549		0.00342375	0.193529	0.265856	0.08	0.776587	0.133293	0.0515371	1.13641	FALSE
TAX1BP1	20		0.00999253	0.0241991	0.522798	0.99	1.27464e-08	0	2.09161	1	0	0	0.523436	1	1		0.453835		0.595181	0.0897162	0.0831198	2.03875	TRUE
XRCC5	30		0.0141662	0.04639	0.281972	0.98	0	0	2.4187	1	0.0244092	0.857104	0.505776	0.58	1		0.469375		0.813961	0.105692	0.0618986	2.25653	FALSE
ZBTB8OS	19		0.114313	0.04639	0.273885	0.98	0.36939		1.8727		0	0	1.06065	1	1		0.567525		0.43113	0.234436	0.112832	0.99089	FALSE
NAPSA	6		2.47334e-07	0.04639	0.23321	0.98	1		0.0304616		1		0.00649027		1		0.0287853		0.366426	0.228039	0.0841869	0.432525	FALSE
TMEM40	4		0.0965623	0.04639	0.328609	0.98	1.5995e-14	0.19659	2.60164	0.92	0.0136444	0.177859	0.35778	0.93	1		0.0465575		0.743419	0.0945732	0.0642221	0.501681	FALSE
SP100	35		0.041395	0.04639	0.549279	0.98	0.0734542	0.05642	2.1151	0.98	0.0587736	0	1.18232	1	0.226951		0.747071		0.338849	0.171882	0.112764	1.45911	TRUE
UPF3A	3		0.00659502	0.04639	0.349603	0.98	0.137664		2.16352		0.160624		0.55037		0.218824		0.255201		0.674104	0.105961	0.0686796	1.59257	FALSE
ABI3BP	5		0.00272506	0.04639	0.28892	0.98	1		1.99383		1.35708e-11	0	0.303339	1	1		0.144496		0.380993	0.0665937	0.0620535	1.15022	FALSE
SYNE2	8		3.07524e-06	0.04639	0.548305	0.98	0.508662		1.30672		1		0.526154		0.608307		0.234541		0.397607	0.117095	0.0681389	2.93471	TRUE
KYNU	2		0.11858	0.04639	0.370266	0.98	0.612247		0.696698		1		0.310697		1		0.363473		0.414396	0.187567	0.146741	1.96694	FALSE
MZT2B	46		0.00557222	0.04639	0.337266	0.98	4.5533e-13	0.779792	3.74589	0.62	1		0.327108		1		0.0789754		0.976279	0.0185718	0.00323579	1.97688	FALSE
NUPR1	17		0	0.04639	0.259073	0.98	0	0	3.74867	1	1		0.0250682		1		0.0297012		0.937073	0.0410342	0.00767305	1.35229	FALSE
PA2G4	6		0.0329743	0.04639	0.26218	0.98	0	0	2.0179	1	1		0.0127044		7.84888e-08	0	0.379889	1	0.784508	0.181944	0.0335475	0.89961	FALSE
PDCD4	2		0.0297448	0.04639	0.451895	0.98	0.161921		1.97585		1		0.0990441		1		0.200432		0.659233	0.160378	0.0887357	1.87893	FALSE
PPIH	6		0.0198978	0.04639	0.450663	0.98	0	0.02933	2.62583	0.99	0	0.302216	0.864973	0.87	1		0.239164		0.76225	0.140839	0.0681272	1.15915	FALSE
ETFA	6		0.0853414	0.04639	0.384887	0.98	1		1.71894		0.787807		0.988783		1		0.0981498		0.616984	0.137168	0.0999727	2.78312	FALSE
SNHG29	6		0.00289123	0.04639	0.398332	0.98	0	0	2.52888	1	5.41786e-06	0	1.17844	1	0.0277033	0.0532794	0.488109	0.98	0.502265	0.187212	0.0882987	1.31578	FALSE
EIF2AK1	5		0.0799794	0.04639	0.202176	0.98	6.63641e-09	0	2.06307	1	0.276087		0.316233		1		0.337217		0.554061	0.1513	0.10823	1.73811	FALSE
SFTA1P	2		0.10957	0.04639	0.150315	0.98	0.511633		1.30228		1		0.360232		0.451165		0.178184		0.434646	0.208191	0.177897	0.542738	FALSE
PLPP3	8		1.0171e-08	0.04639	0.239685	0.98	0	0.129322	2.29803	0.95	1		0.00617856		1		0.00249491		0.481614	0.213237	0.168481	0.878432	FALSE
PABPC4	6		0.000113503	0.04639	0.625598	0.98	0.24823		1.60949		0.0584963	0.177859	0.552004	0.93	1		0.132271		0.746517	0.0872423	0.0638733	2.36285	TRUE
MLEC	6		8.36965e-05	0.0683096	0.474273	0.97	1		0.0503823		0.821145		0.537638		1		0.164293		0.887434	0.0730003	0.0233979	2.68697	FALSE
ARID4B	33		0.0370338	0.0683096	0.323689	0.97	6.4354e-15	0.19659	2.36637	0.92	1		0.650421		0.0212373	0.124151	1.28229	0.95	0.324252	0.16086	0.139078	1.52882	FALSE
DSTN	2		0.000296852	0.0683096	0.928279	0.97	0.0487476	0	0.850883	1	0.144725	0.302216	0.344198	0.87	0.00317708	0.215345	0.590938	0.91	0.511409	0.255056	0.2225	1.53624	FALSE
RRBP1	16		0.00153354	0.0683096	0.325066	0.97	5.52506e-06	0	1.43691	1	3.1244e-06	0	0.541069	1	0.328199		0.42123		0.461171	0.235435	0.0902242	1.28691	FALSE
PPP2R2A	2		0.032963	0.0683096	0.449096	0.97	1		0.876065		0.00279196	0.302216	1.16572	0.87	0.948046		0.365298		0.602067	0.191655	0.0993311	1.67279	FALSE
LIFR	5		0.032963	0.0683096	0.404402	0.97	0.910389		1.06209		1		0.821251		1		0.174017		0.573137	0.24839	0.0654583	0.61099	FALSE
SMCHD1	10		1.31956e-05	0.0683096	0.608628	0.97	0.031821	0.439405	1.01707	0.8	0.267553		0.975286		1		0.381034		0.504079	0.243007	0.096001	1.95632	FALSE
AAMDC	10		0.0977091	0.0683096	0.289783	0.97	1		1.90171		1		0.227594		1		0.00474697		0.721102	0.1506	0.0224305	1.35931	FALSE
PTGR1	6		0.1235	0.0683096	0.172582	0.97	0.000105993	0	2.40623	1	0	0	0.712496	1	1		0.0645609		0.797252	0.0735853	0.0507456	0.914538	FALSE
CARD19	2		0.00820154	0.0897992	0.450217	0.96	0.997183		1.08866		1		0.142062		1		0.0299484		0.80488	0.119146	0.033539	1.34946	FALSE
WFDC21P	8		0.00272175	0.0897992	0.504454	0.96	1		1.31193		0.312513		0.395437		1		0.250834		0.65123	0.230457	0.0845457	1.48377	FALSE
ATP6V1D	8		0.115117	0.0897992	0.318113	0.96	1.04357e-13	0.383473	2.08592	0.17	2.73954e-12	0.604211	0.443456	0.72	1		0.0754207		0.757397	0.119546	0.074322	1.23972	FALSE
SLTM	23		0.0447766	0.0897992	0.514998	0.96	3.41018e-06	0	2.15739	1	0.115811	0.284094	0.669588	0.88	1		0.355149		0.595692	0.0912085	0.0712139	2.19399	FALSE
HNRNPU	15		0.032963	0.0897992	0.366991	0.96	1.20676e-05	0	2.22505	1	0.000208685	0.243127	0.675065	0.9	4.40776e-09	0	0.537677	1	0.626526	0.261944	0.0717968	2.25506	FALSE
CD37	11		0.0739389	0.0897992	0.266429	0.96	1		2.12239		4.24885e-15	0.0302685	0.971317	0.99	4.27202e-05	0	0.765967	1	0.418931	0.21667	0.113556	1.00995	FALSE
PITPNB	4		0.100507	0.0897992	0.462488	0.96	1		0.453896		1		0.524127		0.641084		0.231033		0.465457	0.261025	0.158032	1.82011	FALSE
RSF1	7		0.00807424	0.110474	0.554689	0.95	0	0.0824651	3.03736	0.97	0.3294		0.253645		3.66774e-05	0.0282403	0.825285	0.99	0.702314	0.147752	0.0623761	2.08025	FALSE
PIN4	5		0.0347101	0.110474	0.410068	0.95	0.00640816	0	0.874483	1	3.12503e-05	0.4059	1.69038	0.18	1		0.255108		0.601897	0.358327	0.0360714	1.54031	FALSE
APP	9		0.00125431	0.110474	0.704664	0.95	1		0.231511		0.00827972	0.0827523	1.32362	0.97	0.923888		0.384487		0.484214	0.281372	0.0937222	2.39134	FALSE
GPCPD1	2		0.0499837	0.110474	0.29529	0.95	1		1.83599		1		0.338977		0.505708		0.292265		0.605754	0.156845	0.106185	1.16507	FALSE
SRP19	3		0.0427364	0.110474	0.262838	0.95	0.0645298	0.402193	1.6211	0.82	0.551852		0.844294		1		0.340747		0.475074	0.273231	0.233092	1.82993	FALSE
NFKBIZ	10		1.96509e-13	0.110474	1.00387	0.95	3.73653e-14	0.106968	1.49134	0.96	0	0	0.882219	1	1		0.27113		0.592742	0.149675	0.138266	2.73438	FALSE
C1orf194	2		0.0678352	0.110474	0.234406	0.95	0.00143746	0.344272	1.61736	0.85	1		0.283718		1		0.0544013		0.891672	0.0708007	0.0227693	0.16201	FALSE
CENPW	4		0.0120885	0.110474	0.296116	0.95	0.0187753	0.106968	0.256444	0.96	1		1.25241e-16		1		5.88081e-17		1	3.4412e-32	6.84261e-35	0.524739	FALSE
AIMP1	8		3.42182e-08	0.131272	0.458163	0.94	0	0.439405	1.97383	0.8	7.99442e-09	0.284094	0.419812	0.88	1		3.71721e-16		0.962523	0.037477	5.93805e-32	0.9822	FALSE
FAM49B	2		0.0459496	0.131272	0.523073	0.94	1		1.39948		0.012774	0.0827523	0.841518	0.97	1		0.108511		0.514095	0.289153	0.0777151	1.5118	FALSE
USP15	2		0.00912841	0.131272	0.540607	0.94	1		0.0281675		0.168614		0.550436		1		0.230168		0.264624	0.187867	0.180788	1.91286	FALSE
FAM183A	2		0.0529044	0.131272	0.285318	0.94	0.111958	0.217992	0.58601	0.91	0.570198		0.244998		1		0.0510951		0.578536	0.369559	0.0519056	1.02623	FALSE
ITGA2B	3		0.00928621	0.131272	0.505732	0.94	1		0.269952		0.924741		0.452808		1		0.534024		0.452469	0.325824	0.0924704	2.10642	FALSE
SET	14		9.93896e-11	0.173333	0.500468	0.92	0	0.02933	1.16533	0.99	1		0.167687		1		0.216156		0.514329	0.243923	0.163302	1.88595	FALSE
ETHE1	20		6.23897e-12	0.173333	0.634204	0.92	0	0.344272	3.02448	0.85	1		0.141688		1		0.152914		0.888535	0.0497717	0.0272019	1.7845	FALSE
JAM2	2		0.0708343	0.173333	0.203612	0.92	0.289569		2.12695		0.0260779	0.177859	0.327871	0.93	0.0973184	0.30014	0.240746	0.87	0.709786	0.167505	0.0735856	1.10228	FALSE
PRAP1	5		0.00350583	0.173333	0.350179	0.92	0.000110099	0.02933	0.400975	0.99	0.9269		0.140134		0.0577201	0.0532794	0.291435	0.98	0.579126	0.248075	0.117065	2.48508	FALSE
CAMLG	4		0.0863474	0.173333	0.380809	0.92	0.0889017	0.129322	0.468433	0.95	0.794898		0.236515		0.0187165	0.25758	0.589852	0.89	0.493723	0.31408	0.173238	1.81816	FALSE
REEP5	12		0.0267002	0.1935	0.207828	0.91	1		1.44099		2.70164e-12	0.221199	1.61116	0.91	1		0.0976771		0.707453	0.266754	0.0155516	0.916918	FALSE
UBE2D3	14		5.55049e-11	0.1935	0.530133	0.91	0	0.498826	1.85575	0.77	1		0.123084		1		0.196574		0.703498	0.186347	0.0473018	1.49627	FALSE
CASP8	2		0.000873737	0.1935	0.769709	0.91	1		0.320556		1		0.578387		1		0.0812499		0.355249	0.262412	0.194397	1.6562	FALSE
IL33	5		0.0312584	0.1935	0.347139	0.91	0.0468769	0.344272	2.14203	0.85	0.000184947	0.243127	0.651565	0.9	1		0.187698		0.75167	0.163683	0.0705543	1.94312	FALSE
COL4A1	2		5.43428e-05	0.212952	0.505904	0.9	0.0878527	0.575027	0.479567	0.73	1		0.0914325		1		0.0595781		0.532567	0.15401	0.138048	0.690255	FALSE
FAAP20	4		0.0501993	0.212952	0.453558	0.9	1		0.0454705		0.948825		0.209408		0.214836		0.38332		0.357848	0.298374	0.259707	2.26756	FALSE
BAZ2B	4		1.763e-05	0.212952	1.25931	0.9	1		0.582657		0.0264412	0.641232	0.739887	0.7	1		0.0667146		0.244952	0.186206	0.10683	1.89867	FALSE
SRSF11	48		7.41545e-16	0.212952	0.563012	0.9	0	0.02933	2.80578	0.99	1		0.909019		0.00873069	0.89913	1.03807	0.56	0.570361	0.224607	0.0944806	1.70084	FALSE
FRA10AC1	4		0.032963	0.212952	0.408965	0.9	0.000188303	0.909231	2.17271	0.55	4.93635e-08	0.0576358	1.17484	0.98	1		0.529173		0.593098	0.179207	0.131308	1.8672	FALSE
ANKRD37	5		0.107561	0.232038	0.578015	0.89	0	0	1.47227	1	1.08382e-05	0	0.294687	1	6.41258e-05	0	0.340723	1	0.659935	0.264894	0.0751708	4.56018	FALSE
unknown_chr2_88900000	8		8.81649e-05	0.232038	0.725375	0.89	0	0	3.60018	1	0.346132		0.516677		0.00265199	0.342708	0.657986	0.85	0.290109	0.0505002	0.0412532	1.64763	FALSE
SNW1	15		0.0598873	0.232038	0.526882	0.89	0	0	2.08937	1	3.77157e-06	0.284094	0.909887	0.88	1		0.561042		0.698538	0.1561	0.11224	1.98943	FALSE
IFT172	2		0.0263384	0.232038	0.553179	0.89	4.73718e-05	0.383473	2.32579	0.83	0.00101272	0.263883	0.538163	0.89	1		0.0997909		0.951035	0.0382966	0.0103024	1.1873	FALSE
TCEA2	2		0.000289766	0.232038	0.463143	0.89	5.84432e-14	0.325108	2.13392	0.86	0.00100688	0.284094	0.384315	0.88	1		0.14833		0.945044	0.0358894	0.0190668	0.524461	FALSE
LRRFIP1	8		0.115878	0.251707	0.300554	0.88	0	0	2.74993	1	0	0	1.33354	1	0.814038		0.395558		0.634152	0.103429	0.0824335	1.96376	FALSE
TPR	10		1.79939e-08	0.251707	0.792274	0.88	0	0.439405	2.16534	0.2	0.225889		0.525088		1		0.041914		0.79338	0.171783	0.0259421	2.79494	FALSE
DAD1	30		5.66569e-06	0.251707	0.513881	0.88	0	0.439405	3.71123	0.8	1.07047e-05	0.263883	0.50171	0.89	1		0.0683408		0.979717	0.0146215	0.00424156	2.86241	FALSE
RAB8B	5		0.0913078	0.271664	0.444415	0.87	0.0243417	0.129322	1.99202	0.95	3.75733e-08	0.0827523	0.876443	0.97	4.44057e-05	0.670987	0.465545	0.69	0.626339	0.18329	0.0698485	1.62528	FALSE
NUP214	7		1.90341e-13	0.271664	0.589256	0.87	0	0.152516	3.47365	0.94	0	0.302216	0.584444	0.87	1		0.00963353		0.958931	0.0400222	0.00099182	1.84568	FALSE
EEF2	2		0.00398969	0.291471	0.569345	0.86	0.00028996	0	1.42342	1	0.000993943	0	0.55253	1	1		0.03471		0.252211	0.103372	0.0776772	2.34862	FALSE
ESD	20		0.0677147	0.291471	0.280318	0.86	0	0	2.57273	1	0	0.221199	0.867867	0.91	1		0.0294235		0.835624	0.126672	0.0291151	0.922697	FALSE
TPD52	10		0.00150373	0.31171	0.337016	0.85	0.106625	0.646243	1.43824	0.69	1.45941e-06	0.386247	0.640372	0.83	1		0.808238		0.534676	0.327422	0.101987	1.52864	FALSE
IRF2	6		0.0496682	0.331874	0.365285	0.84	6.72632e-10	0.283114	1.76005	0.88	1		0.0526787		1		0.167436		0.546825	0.363699	0.0407845	1.23619	FALSE
PILRA	3		0.107985	0.351963	0.312039	0.83	5.03427e-06	0.152516	2.26035	0.94	0.0630432	0.0576358	0.770187	0.98	0.878782		0.28884		0.869585	0.0909335	0.025408	0.74114	FALSE
TKT	14		8.09452e-06	0.371292	0.838273	0.82	0	0.85299	2.40167	0.58	0.000399536	0.604211	0.434612	0.72	1		0.317066		0.815408	0.0682711	0.0373172	2.75759	FALSE
EIF4B	48		0.0867782	0.371292	0.376573	0.82	0	0.129322	2.53595	0.95	2.59782e-12	0	1.0986	1	1		1.1514		0.670438	0.108911	0.0845458	1.29514	FALSE
HIKESHI	8		0.0918914	0.391197	0.40401	0.81	1		2.31838		1		0.119327		1		0.0174844		0.90404	0.0574945	0.0184803	0.923647	FALSE
UPP1	12		0.0643557	0.411029	0.82177	0.8	0.111958	0.106968	1.3102	0.96	1		0.283298		1.1775e-11	0.0532794	0.50786	0.98	0.300303	0.214888	0.115542	2.38658	FALSE
PYCARD	5		0.0323628	0.43	0.858193	0.79	0.0286314	0.344272	0.895645	0.85	1		0.0877479		1		6.23964e-16		0.913789	0.0862111	3.6629e-31	2.09552	FALSE
TMC5	2		0.0835928	0.43	0.57735	0.79	0.0842359	0.363692	0.540062	0.84	1		5.97917e-17		1		1.28186e-17		1	8.77243e-34	8.96097e-35	0.989743	FALSE
SLC15A3	2		0.114163	0.469234	0.29185	0.77	1		0.259776		0.797849		0.230694		1		0.198604		0.938878	0.0535176	0.00760481	1.11866	FALSE
C11orf58	15		0.0767984	0.469234	0.340752	0.77	0	0.129322	4.80567	0.95	0.00265763	0.486373	1.27205	0.78	2.76743e-11	0.102412	0.490651	0.96	0.856173	0.0907247	0.0353813	1.57852	FALSE
SEC14L1	14		1.75695e-10	0.509107	0.484229	0.75	0	0	2.33046	1	1		0.0749189		1		0.187593		0.677946	0.0941975	0.0592024	2.67578	FALSE
SMARCE1	4		0.10458	0.548836	0.394976	0.73	1		2.0433		0.750959		0.282871		1		0.208818		0.786506	0.108859	0.0513204	2.62458	FALSE
JAK1	7		0.100507	0.588421	0.256434	0.71	1.5988e-13	0.628723	2.30707	0.3	0.0611042	0.156416	0.453229	0.94	1		0.272574		0.59685	0.176108	0.124781	6.81284	FALSE
RIOK3	7		5.77471e-05	0.66837	0.541808	0.67	0	0.02933	1.55538	0.99	1		0.104003		0.0212373	0.0282403	0.356036	0.99	0.559659	0.224446	0.100204	2.15222	FALSE
ELOC	7		0.0861695	0.748029	0.284598	0.63	0.120711		2.07956		0.00151753	0.91009	1.54871	0.55	1		0.429496		0.567161	0.258178	0.0686529	1.07865	FALSE
ATP1A1	6		0.00525575	0.766859	0.90592	0.62	1		0.846485		1		0.339796		1		0.0220765		0.72442	0.219593	0.021513	2.26779	FALSE
MZB1	6		0.00460575	0.866198	0.288837	0.57	1		0.0398986		1		0.0934452		1.1913e-08	0.688105	0.34824	0.32	0.905767	0.0870901	0.00596944	0.268116	FALSE
SUCLG1	4		0.000489188	0.904856	0.69035	0.45	2.28929e-09	0.175297	3.13639	0.07	2.24737e-06	0.765459	0.692636	0.63	1		0.00276237		0.946796	0.0513661	0.0018076	1.55994	FALSE
TRMT112	16		0.047809	0.923303	0.233331	0.46	1		1.79939		1		0.00105803		1		1.72651e-15		0.989439	0.0105607	1.05816e-30	0.833246	FALSE
DNAJC3	6		0.00153354	0.941685	0.671762	0.53	6.81062e-11	0.612107	1.59218	0.71	0.022086	0.62133	0.37881	0.71	0.00948025	0.535322	0.333296	0.76	0.83577	0.109699	0.0545314	1.66036	FALSE
EMP1	3		0.0891686	0.98	0.243991	0.51	1		0.0438643		1		0.0542321		1		0.10843		0.841415	0.100298	0.0533841	0.600286	FALSE
ABCA6	2		0.801399		0.0998099		1		1.24481		1		0.483223		0.628783		0.215587		0.58895	0.116951	0.0894842	0.275406	FALSE
ABCA9	2		0.904483		0.336974		1		0.677025		1		0.736099		1		0.568766		0.510725	0.168999	0.148482	0.443562	FALSE
ACAP1	5		1		0.199087		1		0.564559		1		0.428217		1		0.0113056		0.678948	0.285449	0.0356038	1.6544	FALSE
ACAP2	4		0.631653		0.268483		1		2.1894		1		0.00503577		1		0.13792		0.812797	0.115775	0.0371374	1.18986	FALSE
ACBD3	5		1		0.130777		1		0.996097		1		1.00801		1		0.0173334		0.642954	0.34341	0.0115073	1.11675	FALSE
ACTG1	4		1		0.219444		3.86892e-09	0.239757	1.65065	0.9	1		0.192796		1		0.0555635		0.327398	0.181152	0.0938424	1.31186	FALSE
ADGRL4	3		1		0.238551		1		0.0274063		1		0.0709575		1		0.144491		0.665152	0.141266	0.0996097	1.15419	FALSE
ADH1B	5		0.210729		0.184876		1		0.890847		1		1.00533		1		0.0592495		0.557185	0.23117	0.0941769	1.10668	FALSE
ADH5	5		1		0.0395182		1		0.0322665		1		5.62011e-18		1		1.03313e-18		1	2.85329e-32	1.25896e-61	6.93889e-18	FALSE
ADRM1	21		1		0.347515		1		0.348905		1		0.0072683		1		0.0030911		0.87839	0.0594888	0.0376379	1.77439	FALSE
AGR3	17		0.157006		0.263919		1		0.168086		1		0.870716		1		0.195924		0.477858	0.219308	0.180374	1.40096	FALSE
AHSP	2		1		0.128141		1		1.39771		1		0.488192		1		0.269431		0.575807	0.34416	0.0448348	0	FALSE
AK1	9		0.914755		0.133592		0.320464		0.157559		1		0.0199473		1		2.35622e-16		0.76777	0.23223	1.69436e-30	0.113505	FALSE
AKR1A1	38		1		0.303329		1		0.212857		1		1.80284		1		0.123391		0.487675	0.450548	0.0236877	1.7825	FALSE
AKR1B10	2		1		0.210745		1		0.206465		1		0.0751546		1		0.00572696		0.628984	0.361696	0.00931941	2.77556e-17	FALSE
AKR1C1	12		1		0.780667		3.79758e-10	0	3.32535	1	1		0.0198698		1		0.0781339		0.809342	0.10089	0.0439352	0.727151	FALSE
ALAS2	3		0.982429		0.04531		1		0.743747		1		0.0713627		0.00146126	0.787896	1.04404	0.63	0.381452	0.2172	0.113742	0.165178	FALSE
ALCAM	2		1		0.206705		0.118168	0.517664	1.64234	0.76	0.207854		0.216606		1		0.0147755		0.877898	0.108124	0.0139781	2.17626	FALSE
ALDH3A1	8		0.958544		0.296061		1		0.252518		1		0.0173227		1		0.742695		0.255721	0.2028	0.116078	0.342508	FALSE
ALG5	12		1		0.136879		1		0.50818		1		0.798068		1		0.236078		0.43835	0.215817	0.14858	4.03976	FALSE
ALKAL2	2		0.173393		0.21494		0.000184681	0.02933	1.07336	0.99	0.366223		0.261755		1		0.169458		0.651717	0.210783	0.125773	0.392176	FALSE
ALKBH7	33		0.705803		0.253747		1		1.64834		1		0.057808		1		0.00543114		0.930942	0.062225	0.0068326	0.601584	FALSE
AMN	7		1		0.065442		1		0.0590163		1		0.00737311		1		0.0115567		0.919776	0.0535996	0.0266241	0	FALSE
ANAPC11	2		1		0.264574		1		0.00811288		1		0.0116008		1		0.00769227		0.833021	0.06384	0.0427716	1.64536	FALSE
ANAPC5	7		1		0.182997		1		1.40118		1		0.290905		1		0.057339		0.689234	0.232736	0.0438121	2.83694	FALSE
ANKHD1-EIF4EBP3	3		1		0.223755		1		0.00840825		1		0.206775		1		0.00684606		0.405318	0.30634	0.13118	2.64226	FALSE
ANP32A	8		0.788122		0.148799		3.699e-15	0	0.702468	1	1		0.00936008		2.30606e-10	0	0.506716	1	0.552942	0.177278	0.120169	2.53714	FALSE
ANP32B	47		1		0.325048		4.66491e-16	0	2.48018	1	0	0	0.952055	1	1		0.0410034		0.864572	0.0986006	0.0126003	0.827009	FALSE
ANP32E	10		1		0.178191		1		0.778776		1		0.325071		1		0.625238		0.26032	0.211267	0.16515	4.21067	FALSE
ANXA11	4		1		0.265683		1		0.0101		1		0.0102671		1		0.284517		0.543858	0.315875	0.130365	3.4255	FALSE
ANXA2	26		1		0.126603		1		0.172317		0.887599		1.38684		1		0.00622412		0.368755	0.166254	0.150368	1.59804	FALSE
ANXA4	2		1		0.241698		1		0.00689398		1		0.03192		1		0.258192		0.655678	0.308469	0.0350085	2.00347	FALSE
APBB1IP	19		0.859448		0.426336		1		1.4806		0.000276882	0.926161	1.35912	0.46	1		0.358388		0.495777	0.212174	0.12748	2.20783	FALSE
APOC1	20		1		0.102808		0	0	2.41959	1	1		0.0508075		1		0.0637611		0.446587	0.276689	0.0704887	0.675805	FALSE
APOC2	4		1		0.121534		1		0.123586		1		0.039629		1		1.68134e-16		0.884768	0.115232	1.63045e-30	0.0736936	FALSE
APPL1	19		0.561453		0.317238		0.00139506	0.19659	3.0035	0.92	0.000100915	0.342532	1.24785	0.85	0	0.193529	0.268294	0.92	0.777687	0.183468	0.0185871	1.50675	FALSE
ARFGAP3	13		1		0.106323		0.0189994	0.871801	2.3897	0.43	1		0.132666		1		0.220789		0.817844	0.0805774	0.0376265	1.19555	FALSE
ARHGAP10	10		1		0.153934		0.000178968	0.536298	2.92188	0.75	4.67524e-10	0.322143	1.27622	0.86	1		0.206488		0.676079	0.166997	0.0483999	0.847216	FALSE
ARHGAP29	19		1		0.416132		0.000214005	0.517664	1.92397	0.76	4.25144e-08	0.131487	0.95976	0.95	1		0.45059		0.510739	0.267903	0.057973	1.44187	FALSE
ARID4A	4		0.612701		0.408535		4.97371e-05	0.363692	1.98517	0.84	0.799408		0.256551		0.923888		0.381367		0.502807	0.171222	0.116603	3.01929	FALSE
ARL3	2		1		0.218264		1		0.218033		1		0.0102078		1		1.12833e-16		0.982774	0.0172259	1.14026e-31	7.01045	FALSE
ARL6IP4	36		1		0.615927		1		0.0233688		1		1.30253		1		0.049989		0.386033	0.33509	0.170967	3.51266	FALSE
ARPC1B	43		1		0.0109408		1		0.000221407		1		0.000391571		1		5.47995e-05		0.560608	0.388046	0.0231136	1.13596	FALSE
ARPC5	35		1		0.487592		0.109435	0.05642	4.39789	0.98	1		0.0884891		1		0.00384909		0.99048	0.00831427	0.000649461	0.772811	FALSE
ASAP1	4		1		0.147069		1		2.48039		0.000836624	0.177859	0.519031	0.93	1		0.0907039		0.771595	0.127416	0.0620278	0.626291	FALSE
ASL	13		1		0.235942		1		1.45826		1		0.670587		1		0.152879		0.397274	0.312631	0.250791	4.63776	FALSE
ASS1	4		0.789795		0.216029		1		0.201864		1		0.466537		1		0.823275		0.656497	0.161835	0.146816	0.907515	FALSE
ATG3	4		1		0.0840902		1		2.2879		1		0.0109099		0.76373		0.230167		0.916432	0.0477701	0.020353	1.14725	FALSE
ATOX1	22		0.129678		0.196056		0	0	3.07907	1	0.000572844	0.342532	0.425672	0.85	0	0	1.08008	1	0.699783	0.179854	0.100712	1.17719	FALSE
ATP2B1	4		0.220291		0.546857		1		0.0112586		1		0.0283896		1		0.0543684		0.577562	0.0953308	0.0894153	1.58997	FALSE
ATP5F1A	30		1		0.0877545		1		0.105282		1		0.0114178		1		3.65698e-16		0.668742	0.331258	1.37669e-29	0.0746641	FALSE
ATP5IF1	31		1		0.0329945		1		0.043237		1		0.0280429		1		4.46415e-17		0.624458	0.375542	7.80394e-31	1.11943	FALSE
ATP5MC2	83		1		0.0646554		1		0.000705144		1		0.000334445		1		0.00851625		0.768857	0.145075	0.0381761	2.24235	FALSE
ATP5MF	55		1		0.168484		0	0	2.55953	1	0	0	1.1152	1	0	0	0.142362	1	0.821127	0.149311	0.0214689	1.27409	FALSE
ATP6AP2	3		0.842723		0.108534		1		0.0477299		3.76977e-08	0.486373	1.55969	0.78	1		0.0814511		0.631701	0.349971	0.0152729	0.208893	FALSE
ATP6V0B	13		1		0.0143666		1		0.0106103		1		0.00649766		1		3.13688e-17		0.996478	0.00352197	5.18939e-30	0.0528887	FALSE
ATRX	4		1		0.498627		1		0.0438695		1		0.214643		1		0.227979		0.443347	0.320495	0.0626863	4.34566	FALSE
AUP1	16		1		0.238804		8.42344e-14	0.05642	2.61051	0.98	1		0.499574		0.00078959	0.215345	0.894217	0.91	0.537234	0.183399	0.133178	1.87298	FALSE
BAX	8		0.374504		0.140342		1		1.73814		0.77986		0.525757		1		0.0662656		0.844619	0.142795	0.0077219	1.45321	FALSE
BCAP29	4		0.810566		0.624737		0.374294		0.833957		1		0.323103		0.154722	0.653642	0.618271	0.3	0.540194	0.319869	0.0605159	1.84578	FALSE
BCL7C	14		1		0.303453		1		1.03766		1		1.0219		1		0.0452874		0.698736	0.253814	0.0242687	1.12662	FALSE
BID	3		1		0.0784456		1		0.0166758		1		0.0264946		1		0.0217442		0.621843	0.282386	0.0919839	0.431346	FALSE
BOLA3	10		0.327679		0.559102		0.194522		0.56243		0.302066		0.480005		1		0.074588		0.705502	0.246861	0.0476372	1.21977	FALSE
BPIFA1	3		0.95643		0.0868798		1		2.23238		0.245602		0.595686		0.679448		0.263023		0.811457	0.0753923	0.0364145	0.234979	FALSE
BPIFB1	10		0.985872		0.146109		0	0	4.02856	1	1		1.41121		1		0.638595		0.645452	0.139461	0.0767583	0.445567	FALSE
BTF3	31		1		0.00798391		1		0.00215905		1		0.00219326		1		0.000933889		0.377851	0.301184	0.118727	0.92851	FALSE
BUD31	14		0.281341		0.506675		0.178756		1.43201		6.71407e-07	0.765459	1.45291	0.63	1		0.0461143		0.493737	0.243356	0.162076	1.39101	FALSE
BZW1	11		1		0.13661		1		0.0228559		1		0.075596		1		0.141161		0.905874	0.0866135	0.00751242	1.31864	FALSE
BZW2	3		1		0.0270519		1		0.266154		0.984296		0.304224		1		0.289303		0.647499	0.172231	0.110399	1.61749	FALSE
C12orf45	2		1		0.0557411		1		1.65223		1		0.0032413		1		0.0013841		0.961004	0.0369703	0.00202545	1.45226	FALSE
C17orf49	8		0.707669		0.168577		0.0335853	0.05642	0.485496	0.98	0.00111035	0	1.25532	1	1		0.0331971		0.434838	0.360179	0.0723067	1.0856	FALSE
C1orf21	2		1		0.0719537		1		0.494914		1		0.0686168		1		1.82813e-17		0.910022	0.0899785	1.00103e-32	0.3752	FALSE
C1orf35	10		0.971667		0.202539		1		2.40239		1		0.120602		1		0.0345572		0.834619	0.109044	0.0304434	1.64341	FALSE
C1orf54	12		0.998165		0.271385		1		0.681094		0.735281		0.654169		1		0.107409		0.436249	0.215838	0.190543	0.994928	FALSE
C4orf48	14		1		0.151739		1		0.406665		1		1.42912		1		0.0408417		0.60583	0.369211	0.0168649	0.883933	FALSE
C9orf24	2		0.797387		0.171868		1		0.000525819		1		0.0290542		1		0.0308009		0.589367	0.241838	0.168795	3.19581	FALSE
CA4	2		1		0.0368105		1		0.0150864		1		0.0300263		1		4.76608e-18		0.650807	0.349193	2.20945e-33	2.55841	FALSE
CALCOCO2	2		0.450411		0.159403		0.00103571	0.129322	0.872308	0.95	1		0.00931632		1		0.0456514		0.596406	0.307265	0.0493407	1.04001	FALSE
CALCRL	5		1		0.0713331		1		1.54373		1		0.338542		1		0.423689		0.545282	0.186058	0.111979	0.353625	FALSE
CALM3	6		1		0.0345444		1		0.0319817		1		0.000128295		1		4.60415e-17		0.979763	0.0202375	1.90612e-30	2.08167e-17	FALSE
CALML4	2		1		0.154964		1		0.0155746		1		0.00482248		1		0.0112943		0.681941	0.203536	0.0554133	2.22356	FALSE
CAMK2N1	3		1		0.101979		1		0.101202		1		0.0220832		1		8.98771e-17		0.773331	0.226669	9.57978e-31	1.38778e-17	FALSE
CAMP	3		0.874007		0.109669		1		1.76886		1		0.0155611		1		4.9747e-16		0.986546	0.0134536	9.25076e-32	0.173239	FALSE
CAMTA1	5		1		0.0750934		7.19303e-05	0.344272	1.76358	0.85	0.285815		1.38502		1		0.48268		0.429195	0.340836	0.203884	0.743944	FALSE
CAPZA2	5		1		0.136827		1		1.42729		1		0.0105796		1		0.022935		0.692501	0.206223	0.090375	0.759789	FALSE
CAPZB	6		0.398212		0.483254		0.0060863	0.106968	1.90075	0.96	0.0066667	0.4059	0.651406	0.82	0.464879		0.612878		0.669349	0.125208	0.0805497	2.00015	FALSE
CARD8	2		0.206492		0.312801		1		1.21516		0.0295482	0.243127	0.680367	0.9	1		0.0866678		0.541452	0.411286	0.0313641	1.63132	FALSE
CASP1	9		1		0.211838		1		0.0808779		1		0.0715168		0.979009		0.261168		0.463118	0.333452	0.110263	0.0488635	FALSE
CBLC	4		0.939427		0.113327		1		1.41451		1		0.0140206		1		0.00663084		0.970962	0.0164528	0.0125851	0.332987	FALSE
CCAR1	2		1		0.0895425		0.388406		1.84994		1		0.0877882		1		0.0044563		0.433517	0.174417	0.120095	2.28772	FALSE
CCDC25	23		1		0.387967		1		0.851483		1		0.962378		1		0.453519		0.479272	0.282303	0.0953969	2.79825	FALSE
CCDC47	10		0.853463		0.17598		1		1.0558		1		0.764843		0.0114779	0.838217	0.242993	0.6	0.486451	0.323434	0.166028	1.08794	FALSE
CCDC88A	4		1		0.253628		1		0.241423		1		0.157528		1		0.157298		0.355893	0.224159	0.166332	2.09915	FALSE
CCDC90B	2		1		0.306561		0.0450752	0.724518	1.80169	0.65	1		0.612455		0.672406		0.295127		0.433347	0.264742	0.122199	1.78982	FALSE
CCL19	4		1		0.0520471		1		0.0117828		1		0.0604647		1		0.0122833		0.774126	0.225042	0.000832663	0.679818	FALSE
CCL23	2		0.955468		0.267489		1		0.231652		1		5.37179e-17		1		1.70647e-17		1	2.54669e-32	3.58837e-34	0.400596	FALSE
CCNB1	7		1		0.225213		1		0.240478		1		0.0644331		1		4.75627e-17		0.807852	0.192148	8.36653e-33	4.83859	FALSE
CCNH	5		1		0.230808		1		0.0144532		1		0.111316		1		0.167179		0.747466	0.09765	0.0570129	2.22092	FALSE
CCT2	6		0.95643		0.112647		1		1.57904		1		0.0188366		1		0.00451865		0.815147	0.180185	0.00466809	0.777828	FALSE
CCT3	6		1		0.298493		1		1.06289		1		1.0924		1		0.0669472		0.746728	0.207959	0.0240713	1.88296	FALSE
CCT6A	8		1		0.178546		1		0.105028		1		0.100929		1		0.0515114		0.526637	0.447158	0.020531	0.126179	FALSE
CCT8	3		1		0.181337		1		0.0236179		1		0.117636		1		0.041992		0.356201	0.2836	0.183441	5.63257	FALSE
CD164	2		1		0.61784		1		0.618635		1		0.0176906		1		8.03219e-17		0.931221	0.0687788	4.71812e-32	1.13987	FALSE
CD36	17		0.165864		0.261019		1.86044e-15	0	3.93804	1	0	0	1.38703	1	1.24512e-06	0	0.846068	1	0.538666	0.200965	0.0915023	0.885829	FALSE
CD3G	18		1		0.300055		1		1.25655		0.79114		0.432325		1		0.225012		0.627897	0.18498	0.138624	2.52905	FALSE
CD52	5		1		0.0537776		1		0.000991265		1		0.00164243		1		0.0465273		0.707423	0.256316	0.0271871	1.5003	FALSE
CD59	3		1		0.0201452		1		0.00177308		1		0.00134904		1		0.00198415		0.53131	0.322846	0.0863908	2.70643	FALSE
CDC123	4		1		0.356871		1		0.473515		1		0.165293		1		0.0165827		0.422992	0.182746	0.171837	4.62364	FALSE
CDC40	5		0.292205		0.24754		1		1.50071		1		0.152712		1		0.0384703		0.663013	0.242783	0.0739701	0.979098	FALSE
CDC42	8		1		0.167452		1		0.119871		1		0.0957966		1		0.0984094		0.550919	0.323719	0.125362	1.02322	FALSE
CDC5L	5		1		0.465191		1		0.0673109		1		0.0215498		1		0.459292		0.648219	0.280686	0.0521981	3.72072	FALSE
CDKN3	7		1		0.173613		1		2.25505		1		0.114198		1		0.11359		0.922568	0.0431898	0.0190931	2.10376	FALSE
CENPK	3		0.91887		0.259654		0.0734542	0.628723	1.71184	0.3	1		0.0791603		1		0.178913		0.487285	0.194634	0.0926365	2.5076	FALSE
CFAP298	6		1		0.57527		1		0.125324		0.794898		0.65088		0.000461088	0.102412	0.329402	0.96	0.868034	0.0859631	0.025841	2.73499	FALSE
CFAP36	8		1		0.112008		3.09727e-06	0.92785	2.89389	0.46	2.00593e-05	0.131487	1.16763	0.95	1		0.388027		0.540755	0.173707	0.0966072	0.730946	FALSE
CFP	6		0.766451		0.181556		1		1.51967		1		0.0866652		1		0.0243228		0.920593	0.0601573	0.0192494	2.41879	FALSE
CHCHD5	10		1		0.377459		1		1.65171		1		0.145564		1		0.0420261		0.697849	0.262437	0.0310596	6.77725	FALSE
CHCHD7	3		0.311894		0.347238		0.584144		0.3383		0.202526		0.688687		0.565249		0.416667		0.349117	0.254044	0.184351	0.946614	FALSE
CHD1	6		0.684296		0.256211		1		0.487019		1		1.23685		0.878782		0.134808		0.347219	0.274752	0.0872866	2.84613	FALSE
CHI3L2	5		1		0.175684		1		0.0177156		1		0.18299		1		0.0111895		0.801714	0.191654	0.00663238	0.0866492	FALSE
CHID1	8		1		0.0519424		1		0.0503789		1		0.0137481		1		0.0938537		0.467647	0.134233	0.116585	1.69632	FALSE
CHMP2A	18		1		0.0237691		1		0.0216958		1		0.000316907		1		1.11242e-19		0.937207	0.062793	9.68705e-33	4.08575	FALSE
CHPT1	15		1		0.148518		1		0.143248		1		0.158874		1		0.000613788		0.559967	0.421599	0.0184334	1.62832	FALSE
CHST9	3		0.852196		0.170221		0.0188993	0.763246	1.00819	0.63	1		0.102462		1		0.196456		0.403186	0.196366	0.192716	0.730712	FALSE
CHURC1-FNTB	4		0.461743		0.221922		9.90227e-06	0.612107	1.42567	0.71	1		0.143225		1		0.224144		0.692137	0.188748	0.119115	1.82831	FALSE
CIR1	12		1		0.51731		0.0493013	0.260561	1.92961	0.89	1		0.283518		1		0.315755		0.748235	0.137863	0.0595667	3.25478	FALSE
CLEC2B	46		0.330199		0.242453		0.106053	0.19659	1.89507	0.92	6.38e-07	0	0.544373	1	0	0.193529	0.647521	0.92	0.544788	0.258536	0.104701	0.698833	FALSE
CLEC4E	2		1		0.341781		1		0.159039		1		0.0472065		1		0.108352		0.460093	0.263477	0.164246	1.22375	FALSE
CLEC7A	2		1		0.0448429		0.205296		0.805114		1		0.0954455		1		0.445346		0.497726	0.189674	0.131794	0.98984	FALSE
CLIC3	8		1		0.0551482		1		0.00934236		1		0.0501954		1		5.03841e-17		0.930523	0.0694772	1.4635e-30	1.48149	FALSE
CLINT1	17		0.990087		0.179168		0.780422		1.62147		1		0.136137		0.0547441	0.653642	0.275624	0.7	0.441027	0.238124	0.151593	1.9519	FALSE
CLTA	2		1		0.0764928		1		1.83844		1		0.10315		1		0.121265		0.790241	0.164677	0.0247264	1.17033	FALSE
CMC1	12		0.39889		0.508484		0.7573		0.360896		3.86694e-05	0	1.34512	1	1		0.0926727		0.566856	0.157225	0.0974944	1.92175	FALSE
CNIH4	13		1		0.202068		1		2.06748		1		0.119146		1		0.0444674		0.762311	0.216945	0.0122108	1.81709	FALSE
CNN1	2		1		0.044932		1		0.105849		1		0.247139		1		1.92854e-17		0.549374	0.450626	9.13522e-33	2.08167e-17	FALSE
CNOT6L	9		1		0.1588		1		0.408394		0.15417	0.177859	1.46234	0.93	0.346397		0.284635		0.543346	0.275334	0.0682498	1.17481	FALSE
CNPY2	28		1		0.18107		1		0.408727		1		0.229103		1		1.33871		0.425585	0.323479	0.147671	1.62211	FALSE
COL1A2	11		1		0.111264		1		0.00166725		1		0.00170898		1		0.00879808		0.727201	0.107611	0.0558713	0.993681	FALSE
COL6A2	5		0.534508		0.369559		0.576644		0.897417		1		0.363122		0.948046		0.457665		0.399771	0.214021	0.115107	0.550051	FALSE
COPS2	2		1		0.124745		0.08593	0.239757	1.36702	0.9	1		0.172435		1		0.124823		0.550384	0.198235	0.184737	1.17968	FALSE
COPS9	11		1		0.194397		1		0.244652		1		0.00131183		1		9.30783e-17		0.783454	0.216546	1.01767e-30	0.178225	FALSE
COPZ2	2		0.683378		0.0652244		0.0211098	0.0824651	0.976721	0.97	0.229835		0.680153		1		0.0468569		0.309989	0.277562	0.190502	0.121328	FALSE
CORO1A	31		1		0.214542		1		0.00537334		1		0.00408009		1		0.00755061		0.281159	0.175451	0.0903935	0.107683	FALSE
COX17	6		1		0.227191		1		0.00213492		1		0.0126189		1		0.235844		0.588729	0.233772	0.129906	2.14342	FALSE
COX4I2	5		0.582145		0.238593		2.06557e-08	0	1.01244	1	1		0.0903495		1		0.250864		0.611733	0.176573	0.0972199	0.278691	FALSE
COX5A	69		1		0.226478		1		0.229733		1		0.0886948		1		0.0454867		0.447122	0.180308	0.154649	1.98741	FALSE
COX7A1	12		1		0.00461515		1		1.99804		1		0.00639719		1		0.00424954		0.992911	0.00588043	0.000999915	0.00347919	FALSE
COX7A2	90		1		0.0913869		0	0	2.25098	1	0	0	0.542983	1	1		0.0178256		0.851196	0.0668654	0.0405714	0.75139	FALSE
COX7B	61		1		0.0807121		0	0	2.39905	1	1		0.143623		1		0.0835082		0.886062	0.0575887	0.0426678	0.157025	FALSE
CPA3	2		1		0.177593		1		0.17929		1		0.0173684		1		9.19852e-17		0.963327	0.0366731	2.16474e-31	5.55112e-17	FALSE
CPNE3	14		0.631653		0.173447		1		0.113553		4.76286e-13	0.82	1.08488	0.4	1		0.0444085		0.802444	0.143962	0.0309824	0.65108	FALSE
CPNE8	5		1		0.0949158		1		0.0774984		1		2.12389e-17		1		4.3977e-18		1	4.36432e-32	2.14027e-64	0	FALSE
CREG1	4		1		0.0648037		1		2.19038		5.32793e-07	0	0.225549	1	1		0.0718653		0.85005	0.111339	0.0204077	0.647233	FALSE
CRELD2	3		1		0.115896		0.968575		0.705164		1		0.0404753		1		0.118792		0.650992	0.307332	0.0253934	0.696239	FALSE
CRLF1	3		1		0.162221		1		0.0675539		1		0.00971429		1		0.00862221		0.732844	0.172408	0.0775304	1.00047	FALSE
CRNDE	5		0.877276		0.182645		1		1.89071		1		0.163367		0.0465751	0.869057	0.46737	0.58	0.744548	0.124724	0.0695291	0.871615	FALSE
CRYAB	8		1		0.0729166		1		0.0110589		1		0.0782217		1		0.0231463		0.805583	0.19219	0.00222652	0.0533238	FALSE
CRYBA2	2		1		0.147671		1		0.120573		1		2.45304e-17		1		1.46225e-17		1	1.89116e-32	1.68353e-33	0	FALSE
CRYL1	8		1		0.0568923		1		0.0258339		1		0.052571		1		0.122567		0.535767	0.211878	0.159797	1.52365	FALSE
CST7	5		1		0.0856283		1		0.0765883		1		5.87433e-18		1		3.98565e-18		1	5.79885e-33	4.12805e-63	0.653556	FALSE
CSTA	16		1		0.00904343		1		2.48006		1		0.0119821		1		0.0146771		0.979932	0.0128308	0.00669211	0.00868542	FALSE
CSTB	7		1		0.0262472		1		0.00183613		1		0.0014894		1		0.000695909		0.530201	0.238943	0.090451	3.46945e-18	FALSE
CTNNBL1	5		1		0.115136		1		0.0196196		1		0.104775		1		1.40735e-17		0.987061	0.0129385	3.21396e-33	1.26263	FALSE
CTSD	3		1		0.189503		1		0.0569314		0.040246	0.690626	0.473899	0.67	1		0.12701		0.0708639	0.0464864	0.0413087	1.47814	FALSE
CTSH	2		1		0.250908		1		0.521018		1		0.499545		1		0.177563		0.414714	0.172897	0.150297	0.927797	FALSE
CXCL12	4		1		0.13734		1		0.198371		1		0.0570753		1		5.43426e-17		0.687911	0.312089	6.34115e-32	0.0845769	FALSE
CXCL14	9		0.990087		0.0881368		1		3.06512		1		0.00458709		1		0.00527426		0.982656	0.00904434	0.00567473	0.167347	FALSE
CXCL17	9		1		0.0997005		0	0.05642	3.7559	0.98	0	0.82	1.57494	0.6	1		0.0239818		0.83405	0.148445	0.00716436	0.159982	FALSE
CXCL3	3		1		0.0795808		1		0.00084859		1		0.0763321		1		0.0261897		0.599781	0.320621	0.0795983	1.31501	FALSE
CYB5A	13		0.611855		0.274326		0	0.85299	2.72013	0.42	1.33491e-13	0.784348	1.0677	0.62	1		0.302774		0.804282	0.110442	0.0373816	0.777744	FALSE
CYBB	3		1		0.473714		1		0.281929		1		0.277441		0.0376008	0.514762	0.332978	0.77	0.87642	0.102701	0.0202045	1.59383	FALSE
CYC1	9		1		0.0175859		1		0.0143588		1		2.65868e-17		1		1.66167e-18		1	3.20727e-30	6.09032e-34	6.93889e-18	FALSE
CYP2B7P	3		1		0.124065		1		0.0939318		1		0.180364		1		0.102352		0.630088	0.259326	0.110586	0	FALSE
CYP3A5	3		0.294345		0.336515		6.65553e-08	0	1.17242	1	1		0.149518		1		0.262082		0.334832	0.152724	0.116065	1.10599	FALSE
CYP51A1	2		1		0.222812		1		0.181926		1		6.41603e-18		1		8.91559e-18		1	4.2829e-33	1.60059e-35	1.17772	FALSE
CYTOR	2		0.810566		0.272213		1		0.0358093		0.549496		0.158741		1		0.300849		0.82659	0.0823715	0.0692717	0.434688	FALSE
DAPL1	3		0.618166		0.189471		1		1.81484		1		0.00309419		1		0.00268274		0.934592	0.0569123	0.00849563	0.271645	FALSE
DCTN3	7		1		0.113474		1		1.66413		1		0.0126733		1		7.00617e-16		0.985699	0.0143013	4.74605e-32	1.14565	FALSE
DCXR	33		1		0.154791		1		2.20191		0	0	0.566572	1	1		0.116683		0.882378	0.0475844	0.0274356	0.612186	FALSE
DDX39A	11		1		0.107778		1		0.0208576		1		0.0961507		1		3.3221e-17		0.995586	0.00441362	5.65402e-33	0.54872	FALSE
DDX3X	41		0.518816		0.347203		1.12413e-10	0	1.7786	1	1		0.666337		0	0.124151	0.503806	0.95	0.461499	0.161019	0.0905498	4.43489	FALSE
DDX46	21		1		0.139652		1		1.55081		1		1.21467		1		0.0426174		0.589021	0.259692	0.0776593	1.33426	FALSE
DDX5	17		1		0.372586		0.00346867	0.02933	2.80147	0.99	1		0.101059		1		0.266759		0.738222	0.131007	0.0452722	1.76031	FALSE
DGUOK	16		1		0.325151		0.0296085	0.536298	0.789832	0.75	1		0.143301		1		0.124025		0.563909	0.239433	0.0910631	3.08546	FALSE
DHRS7	9		0.217818		0.333576		1.67422e-13	0.02933	3.00273	0.99	1.83451e-11	0.470025	1.77404	0.21	1		0.187517		0.708453	0.249932	0.0311099	1.88745	FALSE
DHX36	2		1		0.147442		1		0.00424958		1		0.119444		1		0.0158022		0.646438	0.350303	0.00256273	2.31203	FALSE
DMKN	5		0.602474		0.0900288		0.132058		1.80733		0.353791		0.303445		0.00855226	0.146766	0.285554	0.94	0.397764	0.12164	0.101394	0.471423	FALSE
DNAJB1	9		1		0.044232		1		0.0020078		1		0.00148836		1		0.0022155		0.115724	0.11212	0.102736	6.93889e-18	FALSE
DNAJC21	15		0.810566		0.450099		0.00147587	0.796166	1.741	0.39	1		1.0691		1.04116e-05	0.869057	1.01882	0.58	0.423383	0.229011	0.105828	2.31081	FALSE
DNAJC2	5		0.39889		0.476178		1		1.90619		1		0.271185		1		0.152947		0.78762	0.105355	0.0839061	2.61864	FALSE
DNAJC4	5		1		0.376194		1		0.0589048		1		0.100798		1		0.112955		0.554447	0.232828	0.0789541	1.90652	FALSE
DNAJC7	2		1		0.494066		1		0.140923		1		0.193921		1		0.228324		0.735275	0.146126	0.0796417	4.10422	FALSE
DNPH1	12		0.284243		0.233673		0	0.96326	3.30711	0.48	0	0.486373	0.90988	0.22	1		0.0118002		0.86968	0.106708	0.020765	1.48325	FALSE
DPP7	11		0.871756		0.425399		1		0.143532		0.392332		0.462537		1		0.101593		0.856271	0.115183	0.0253614	1.7831	FALSE
DPT	3		1		0.0599401		1		0.0519096		1		4.8515e-18		1		5.08334e-18		1	6.48321e-34	9.06697e-36	0	FALSE
DUT	17		1		0.145557		1		0.378496		1		1.32203		1		0.000174088		0.742708	0.250241	0.00625276	2.06869	FALSE
DYNC1LI2	5		1		0.115265		0.723068		1.47454		1		0.12444		1		0.0817894		0.465771	0.16197	0.133358	0.54333	FALSE
DYNLRB2	2		1		0.240737		1		0.0569082		1		0.215717		1		0.157786		0.612257	0.204627	0.114628	0	FALSE
EAF2	3		0.154562		0.123194		0.861317		1.24114		1		0.338546		1		0.0390026		0.546204	0.281993	0.150075	1.37798	FALSE
ECH1	7		1		0.0719683		1		0.0656084		1		0.00342446		1		4.33888e-17		0.829949	0.170051	4.78259e-31	2.77556e-17	FALSE
ECRG4	3		0.830028		0.18741		0.666725		0.196502		1		0.0478012		1		3.88603e-17		0.991006	0.00899364	3.17943e-32	0.130887	FALSE
EDN1	4		1		0.0288738		1		0.0260204		1		0.0725972		1		0.0384458		0.795561	0.178788	0.0256516	0.0297357	FALSE
EDNRB	6		1		0.303002		1		0.297574		1		0.0743505		1		0.332812		0.850705	0.0891245	0.0551942	0.602514	FALSE
EEA1	10		0.550531		0.334639		6.92194e-06	0.129322	2.09395	0.95	1		0.512305		1		0.206805		0.439758	0.136404	0.0944322	2.40083	FALSE
EEF1A1	89		1		0.0419019		1		0.000925688		1		0.000457479		1		0.0004745		0.107232	0.102453	0.0967665	1.74652	FALSE
EFHD2	14		1		0.219598		1		0.225912		1		0.0086213		1		0.0298315		0.76944	0.165016	0.0655441	2.49656	FALSE
EHF	6		0.199988		0.340854		0.604875		1.35035		1		0.442656		1		0.191559		0.387438	0.228668	0.13309	1.14414	FALSE
EIF2AK2	3		1		0.125331		1		1.30594		1		0.448062		1		0.0127749		0.354571	0.243363	0.131992	1.35851	FALSE
EIF2AK4	9		0.856642		0.252907		0.968575		1.52405		1		0.283493		0.000650799	0.886959	0.432372	0.57	0.821942	0.0999426	0.0463958	1.82962	FALSE
EIF3A	7		1		0.131562		1		0.0969557		1		0.0950814		1		1.23069e-17		0.690192	0.309808	1.09101e-32	5.52274	FALSE
EIF3D	12		0.227951		0.378628		7.65495e-11	0.498826	1.90296	0.77	0	0.177859	1.74082	0.93	6.83103e-05	0.89913	0.378209	0.56	0.742994	0.245103	0.00964106	1.9361	FALSE
EIF3E	86		1		0.146716		1		0.059124		1		0.142107		1		0.0928318		0.388569	0.305349	0.12161	1.56624	FALSE
EIF3G	76		1		0.0432432		1		0.017556		1		0.0128838		1		0.0112496		0.608076	0.299215	0.0504843	1.78322	FALSE
EIF3H	37		0.126743		0.370899		0	0.815172	2.34009	0.6	0	0	1.11773	1	1		0.199618		0.736109	0.1703	0.0593331	2.5083	FALSE
EIF3L	63		1		0.0345854		1		1.96061		1		0.16173		1		0.0270001		0.864846	0.0486324	0.0231616	0.42213	FALSE
EIF4A1	59		1		0.213665		1		0.00306483		1		0.221296		1		0.000307103		0.778007	0.115132	0.0231671	1.11074	FALSE
EIF4A2	5		0.212855		0.426541		3.22853e-08	0	1.41433	1	0.00137749	0	1.01435	1	1		0.129513		0.433054	0.243453	0.136195	2.66152	FALSE
EIF4A3	14		1		0.126899		1		0.0199027		1		0.12948		1		0.0141918		0.672686	0.181554	0.0961993	0.0635722	FALSE
EIF4G2	21		1		0.193022		0	0.02933	2.64773	0.99	1		0.356053		1		0.521871		0.728818	0.119697	0.0858493	1.3067	FALSE
EIF5A	11		1		0.253786		8.18695e-07	0	3.24158	1	1		0.145708		1		0.0524828		0.289491	0.10782	0.0916356	3.7524	FALSE
EIF6	9		1		0.308716		1		0.0457925		1		0.0135428		1		0.11064		0.56065	0.411431	0.0220978	0.229268	FALSE
ELF1	40		0.162397		0.36981		1		1.09393		1		0.990703		1		0.111896		0.613232	0.183735	0.0686143	1.6271	FALSE
ELOB	92		1		0.0213144		1		1.96898		1		0.0106697		1		0.0354262		0.972039	0.0138227	0.010625	0.614937	FALSE
EMC3	11		1		0.13383		1		0.160952		1		0.369377		0	0.819872	1.08203	0.39	0.619237	0.185933	0.116009	0.677365	FALSE
EMP2	6		1		0.0287599		1		0.0234823		1		6.7459e-18		1		9.27973e-19		1	2.91775e-32	1.12569e-63	1.04083e-17	FALSE
ENO1	4		1		0.0627544		1		0.00648591		1		0.0591499		1		0.00186633		0.887525	0.0914853	0.0194704	4.62461	FALSE
EPB41L4A-AS1	34		1		0.161384		1		0.547725		1		0.235165		1		0.0734791		0.716552	0.250162	0.0332853	3.99168	FALSE
EPCAM	9		1		0.293009		0.0114172	0.175297	2.18876	0.93	1		0.581008		0.00166385	0.342708	0.254943	0.85	0.695066	0.149511	0.0644613	0.990788	FALSE
EPRS1	2		1		0.117548		1		0.109645		1		0.0427001		1		1.35662e-17		0.997553	0.00244665	2.97145e-35	1.38778e-17	FALSE
EPS15	2		1		0.486768		1		0.158651		1		0.191635		1		0.39171		0.342888	0.198834	0.15275	3.95313	FALSE
EPSTI1	2		1		0.0241807		1		1.77356		1		0.0406356		1		0.0177328		0.67708	0.179603	0.0654203	0.939129	FALSE
EREG	3		1		0.185457		1		0.31909		1		0.0148673		1		0.359855		0.757827	0.138738	0.0985887	1.74214	FALSE
ERGIC2	10		1		0.124214		1		0.0072597		1		0.0635548		1		0.149382		0.438036	0.21261	0.199242	1.90636	FALSE
ERGIC3	20		1		0.0447421		0	0	3.18028	1	1		0.0634978		2.48496e-06	0	0.44397	1	0.79168	0.18814	0.00882577	0.433736	FALSE
ERP44	7		1		0.218499		1		0.0400343		1		0.00740896		1		0.18424		0.645341	0.301958	0.036018	2.06641	FALSE
ETFB	29		1		0.215381		0.00732644	0.05642	1.27986	0.98	0	0	0.343029	1	3.42569e-11	0	0.389931	1	0.486767	0.237428	0.0986915	2.9154	FALSE
ETS2	22		0.698941		0.2986		1		1.03388		1		1.11974		1		0.294351		0.592591	0.295491	0.0836747	1.02069	FALSE
EXOSC7	2		1		0.365942		1		0.00152521		1		0.403655		1		0.0538324		0.588238	0.385312	0.02645	0.753693	FALSE
EXOSC8	6		0.894879		0.391882		1		0.157551		1		0.224679		1		0.148113		0.505367	0.229724	0.192298	1.61434	FALSE
EXOSC9	2		0.343696		0.76804		1		0.249341		1		0.55906		1		0.443499		0.628823	0.20207	0.150099	3.23419	FALSE
F13A1	5		1		0.169699		1		0.0793042		1		0.0897407		1		0.226007		0.962849	0.028279	0.00887194	5.55112e-17	FALSE
FABP4	29		1		0.0304176		0	0	2.83308	1	0	0	1.19315	1	3.02925e-05	0	0.0844457	1	0.8442	0.115072	0.0118694	0.497818	FALSE
FABP5	42		0.939831		0.180054		1		1.84516		1		0.19794		1		0.0150099		0.523858	0.435106	0.0374812	0.701148	FALSE
FAM177A1	5		0.851924		0.156794		0.0750453	0.260561	2.43735	0.89	0	0	0.899427	1	0.00237871	0.215345	0.30375	0.91	0.675585	0.206066	0.0420104	1.5773	FALSE
FAM204A	3		0.789403		0.328943		1		2.14968		1		0.154979		1		0.17627		0.659551	0.193381	0.0702294	1.67432	FALSE
FAM3B	9		1		0.225298		1		0.234742		1		0.030958		2.18469e-10	0.278028	0.514708	0.88	0.718798	0.204654	0.0700876	0.85543	FALSE
FAM50A	7		1		0.0209126		1		0.507793		1		0.0690492		1		0.0597996		0.504096	0.340057	0.133451	1.66982	FALSE
FBL	7		1		0.028677		1		0.0201501		1		0.0167117		1		1.05173e-17		0.585527	0.414473	5.6767e-32	0.946272	FALSE
FBN1	4		1		0.0287539		2.18224e-05	0.129322	0.581752	0.95	1		0.0164641		1		0.0176667		0.355558	0.266605	0.191124	0	FALSE
FBXO9	3		0.796109		0.189043		1		1.86816		1		0.287171		1		0.0569417		0.589134	0.377309	0.0195548	0.452242	FALSE
FCGR2A	2		1		0.579535		1		0.577225		1		0.0822731		1		2.37283e-16		0.940012	0.0599879	1.21102e-32	0	FALSE
FCGRT	21		1		0.14794		0	0.402193	3.04701	0.82	1		0.251598		1		0.0704234		0.580791	0.238127	0.0527892	2.11804	FALSE
FCHO2	5		0.517782		0.177056		0.000243703	0.575027	1.36935	0.27	1		0.137555		0.431769		0.470328		0.50899	0.22893	0.157865	0.892017	FALSE
FDPS	14		1		0.0143254		1		0.0209497		1		0.0135738		1		0.0612827		0.491497	0.409823	0.0755889	0.570473	FALSE
FDX1	2		1		0.131406		1		2.10992		1		0.010107		1		0.00148131		0.697237	0.213831	0.0841986	0	FALSE
FEZ2	3		0.675183		0.23273		1		1.41547		1		0.388642		1		0.0400688		0.694689	0.162576	0.0957654	0.822268	FALSE
FGF7	4		1		0.116526		0.00505272	0.98	1.88079	0.49	1		0.170099		0.000180608	0.89913	0.690513	0.44	0.555878	0.322068	0.118448	0.166214	FALSE
FGFR1	2		0.450872		0.345437		0.860211		0.380169		1		0.378135		1		0.323483		0.258398	0.210393	0.15018	1.08401	FALSE
FGGY	2		1		0.212274		1		1.46478		1		0.497376		1		0.031865		0.522789	0.265843	0.0918683	1.38302	FALSE
FH	3		1		0.0877058		1		0.0877058		1		7.85487e-16		1		8.87954e-17		1	1.22049e-30	1.23479e-31	1.38778e-17	FALSE
FIBP	29		0.242933		0.226299		1		1.47785		1		0.0422179		1		0.0560561		0.687881	0.205616	0.0944464	1.44502	FALSE
FIS1	28		1		0.157353		1		0.0232167		1		0.0384638		1		0.0345856		0.859563	0.0780639	0.0573658	7.39141	FALSE
FKBP11	26		0.726242		0.191636		0	0	4.4197	1	0	0	1.47054	1	0	0	0.669372	1	0.858602	0.102261	0.0235768	0.710858	FALSE
FKBP2	58		1		0.0964688		1		2.85152		1		0.250949		1		0.306105		0.836356	0.114778	0.0269539	1.19346	FALSE
FLT1	3		0.673074		0.280518		0.187709		0.884355		1		0.192879		1		0.238658		0.660873	0.164623	0.0595682	1.22196	FALSE
FNBP1L	2		1		0.220351		1		1.25627		1		0.202761		1		0.180801		0.384131	0.279823	0.130616	0.842386	FALSE
FOLH1	2		0.398212		0.203937		1		0.379661		0.763668		0.294466		1		0.209191		0.45251	0.244127	0.150181	0.540346	FALSE
FOSB	4		1		0.164654		1		0.0137715		1		0.0841217		1		0.161278		0.597924	0.216046	0.18501	0.111403	FALSE
FOXP1	3		1		0.0610009		1		1.2638		1		0.286725		1		0.254015		0.309442	0.176787	0.123111	2.39359	FALSE
FRG1CP	3		0.842028		0.406757		1		0.254512		1		0.132966		0.705819		0.544087		0.374872	0.302596	0.172243	1.61176	FALSE
FST	3		0.225219		0.293749		1		1.1452		1		0.271811		1		0.138233		0.552534	0.244532	0.155695	0.674679	FALSE
FTL	141		1		0.106548		0	0	8.9913	1	0	0	15.7434	1	0	0	19.4807	1	0.139478	0.0485622	0.0472093	0.762643	FALSE
FUOM	4		0.663524		0.166765		1		1.5597		0.00982054	0.0302685	0.377128	0.99	1		0.148412		0.801931	0.132646	0.0617818	0.72402	FALSE
FUS	12		1		0.346791		1		0.206801		1		0.307012		1		0.179842		0.585719	0.391909	0.0223722	4.37506	FALSE
FXYD1	8		1		0.0271979		1		0.0405221		1		0.0239419		1		0.110132		0.510748	0.233576	0.119699	1.24801	FALSE
FXYD5	21		1		0.240968		0.0190913	0.664745	2.09966	0.32	3.73974e-14	0.585433	1.15697	0.73	0.0112771	0.614133	0.44047	0.72	0.345587	0.242459	0.123563	2.41748	FALSE
GADD45A	2		0.216203		0.275355		1.9776e-05	0.325108	3.34844	0.86	1		0.128955		1		0.212817		0.960689	0.0298247	0.00948636	0.548669	FALSE
GLIPR1	12		1		0.208524		0	0	2.65932	1	2.87209e-12	0.0827523	0.493023	0.97	0	0	0.681647	1	0.67225	0.179238	0.0963727	2.35744	FALSE
GLRX3	4		1		0.169271		1		1.43766		1		0.253826		0.706914		0.386282		0.392802	0.207093	0.169371	1.56344	FALSE
GNG5	62		1		0.0347572		0	0	3.11576	1	1		0.0256777		0	0	0.477917	1	0.958719	0.0263435	0.00949826	0.463859	FALSE
GNL3	3		0.877421		0.383862		0.910389		1.0454		1		0.438188		0.380258		0.328262		0.368611	0.276278	0.130908	1.41985	FALSE
GOLM1	6		0.823741		0.151254		1		1.95715		1		0.835364		1		0.142137		0.621227	0.320825	0.0271143	0.585781	FALSE
GPATCH4	3		1		0.257627		1		0.395847		1		0.0555669		1		0.00947408		0.704918	0.117532	0.0867361	5.58831	FALSE
GPX4	84		1		0.0803291		1		2.74505		1		0.125402		1		0.477041		0.914231	0.0440734	0.0149693	0.592496	FALSE
GRB2	3		1		0.205589		1		0.0647973		1		0.189589		1		0.1799		0.310041	0.265357	0.244685	0.525446	FALSE
GSPT1	7		0.973785		0.172116		1		1.03844		1		0.464579		0.0327016	0.124151	0.359864	0.95	0.597555	0.228715	0.162998	1.64882	FALSE
GSTK1	6		1		0.370473		1		0.266352		0.177369		0.829445		1		0.0216473		0.740784	0.102479	0.0691221	2.70338	FALSE
GSTO1	48		0.952121		0.162677		0	0	2.75368	1	4.24885e-15	0	0.603351	1	0	0	0.62254	1	0.587353	0.185876	0.105407	2.1911	FALSE
GTF2A2	6		0.675183		0.213834		1		1.36498		1		0.205024		1		0.0293104		0.438388	0.235273	0.122456	1.15553	FALSE
GTF2F2	2		1		0.212662		1		1.49129		1		0.0293327		1		0.291329		0.843623	0.124993	0.0298815	0.987964	FALSE
GTF2I	3		1		0.186224		1		0.0805257		1		0.0788453		1		0.731937		0.394419	0.311586	0.196996	0.778584	FALSE
GTPBP4	2		1		0.261093		1		0.258347		0.794898		0.0713491		1		1.59459e-16		0.996468	0.00353232	1.51889e-31	0.0988715	FALSE
GUK1	46		1		0.178406		0	0	2.05995	1	0	0	1.20191	1	0.444664		0.8977		0.659139	0.178115	0.0649592	2.18076	FALSE
GYPB	2		1		0.191001		1		0.0885646		1		0.100949		1		0.317341		0.582776	0.298202	0.0832861	0	FALSE
H2AZ2	4		1		0.207575		0.391325		0.78635		1		0.114186		1		0.078418		0.706736	0.160357	0.0770438	1.60868	FALSE
H3-3B	17		1		0.0238998		1		0.000635913		1		0.00193758		1		0.0232342		0.485533	0.428671	0.0749386	0.533062	FALSE
HAGH	5		1		0.0344623		1		0.0281383		1		2.31738e-17		1		1.25707e-18		1	5.35277e-31	1.8063e-35	1.38778e-17	FALSE
HAMP	3		1		0.079719		1		0.0784246		1		0.0144297		1		6.51012e-17		0.959449	0.0405512	7.50461e-31	1.38778e-17	FALSE
HBB	15		1		0.0378016		0	0	22.5167	1	1		3.62107		0.958084		9.0081		0.11925	0.082985	0.0640111	0.471893	FALSE
HBD	4		1		0.110061		1		0.0118604		1		0.032939		1		0.100212		0.568979	0.282295	0.0965759	0.417997	FALSE
HBEGF	6		0.803324		0.187985		2.46315e-06	0.106968	0.835638	0.04	1		0.1434		1		0.282518		0.636653	0.287988	0.0611736	0.841038	FALSE
HBM	3		0.768334		0.124408		1		2.63568		1		0.0404066		1		0.00866767		0.982815	0.0140524	0.00313258	0.441975	FALSE
HBQ1	2		1		0.0410305		1		0.0335013		1		1.66308e-17		1		2.11258e-18		1	3.83948e-31	4.52656e-63	0	FALSE
HCLS1	2		1		0.0205724		1		1.48349		1		0.0481362		0.261715		0.105871		0.856035	0.0950434	0.0389031	1.65065	FALSE
HDLBP	3		0.831245		0.271708		1		0.0370324		1		0.0815719		1		0.254244		0.660108	0.307204	0.0326885	0.865264	FALSE
HEBP2	4		1		0.277046		1		0.0666162		1		0.237051		1		2.22448e-17		0.774089	0.225911	4.63058e-32	0.762786	FALSE
HEXA	5		0.538202		0.106656		1		1.74562		1		0.0760222		1		0.000366513		0.911677	0.0659583	0.0137405	1.13134	FALSE
HEXB	18		0.415488		0.404223		1		0.777984		1.02562e-06	0	1.67057	1	1.43875e-12	0	0.31775	1	0.629125	0.301282	0.0325122	1.03599	FALSE
HIGD1B	4		0.142095		0.284146		1		1.43476		1		0.318062		0.126524	0.98	0.260765	0.49	0.678409	0.153396	0.122758	0.586842	FALSE
HINT2	23		0.423502		0.231256		0	0.05642	2.32603	0.98	1		0.179337		1		0.464691		0.879081	0.0805237	0.0320197	0.860626	FALSE
HMGB1	64		1		0.0237878		1		0.00136879		1		0.00162602		1		0.00170291		0.989033	0.00968337	0.000946183	1.72666	FALSE
HMGB2	10		0.185256		0.261507		0	0.129322	3.58301	0.95	0.248547		0.235727		1		3.67768e-15		0.993065	0.0069353	8.56448e-31	1.35981	FALSE
HMGB3	7		1		0.160293		1		0.0424474		1		0.174302		1		0.0121888		0.641732	0.303361	0.0549067	4.50187	FALSE
HMGN2	7		1		0.056309		1		0.0558358		1		0.00736913		1		8.26509e-17		0.991747	0.00825281	1.54299e-30	2.08167e-17	FALSE
HMGN3	2		0.851924		0.0954663		0.323169		1.41424		1		0.0288226		0.701071		0.17262		0.759357	0.156388	0.0842542	0.853697	FALSE
HNRNPAB	12		0.309184		0.484652		0.182022		0.60307		0	0	1.80239	1	1		0.125934		0.564669	0.392396	0.0257557	0.784254	FALSE
HNRNPH3	5		0.200758		0.644127		0.862878		0.366801		1		0.680242		0.814038		0.418601		0.372271	0.276157	0.240658	3.12567	FALSE
HNRNPK	12		1		0.359953		0.73097		1.67033		1		0.0983446		1		0.250145		0.46563	0.215342	0.149637	2.25555	FALSE
HNRNPM	3		1		0.188079		1		0.0834327		1		0.185264		1		0.108528		0.592493	0.361909	0.0423681	1.07368	FALSE
HNRNPR	6		0.450411		0.30332		0.00492482	0.175297	1.7284	0.93	1		0.31779		1		0.361511		0.407422	0.177199	0.164034	1.84325	FALSE
HSBP1	13		1		0.022911		1		0.0246156		1		0.00368091		1		2.12563e-17		0.850808	0.149192	1.46306e-30	1.06368	FALSE
HSPA8	3		1		0.152884		1		0.152466		1		0.0144889		1		5.16945e-17		0.920607	0.0793933	7.69411e-32	2.87223	FALSE
HSPA9	4		1		0.168959		1		0.0524078		1		0.00630321		1		0.0270172		0.784754	0.212991	0.00225484	0.10962	FALSE
HSPD1	40		0.694928		0.268231		0	0	2.69939	1	0	0	0.880169	1	0.000507707	0	0.304417	1	0.818228	0.0545526	0.0304032	0.533639	FALSE
HYI	7		0.150393		0.554424		0.252972		1.92302		0.0418796	0.708268	0.29531	0.66	0.0733657	0.25758	0.401623	0.89	0.813653	0.0944193	0.060199	1.6485	FALSE
HYPK	41		1		0.0495549		1		2.10504		1		0.0111906		1		0.0144602		0.942246	0.043309	0.0080151	1.41044	FALSE
ICAM2	2		1		0.0311019		1		0.0590821		1		0.0649091		1		1.98944e-17		0.74783	0.25217	2.19529e-31	1.04083e-17	FALSE
ID2	32		1		0.0249749		1		1.90578		1		0.0298337		1		0.00321967		0.9545	0.0262144	0.0142958	0.0187358	FALSE
ID4	3		1		0.137617		1		1.70889		1		0.226632		1		0.0889496		0.653741	0.264095	0.0768788	0.555477	FALSE
IDH3G	23		1		0.222323		1		1.46296		1		0.211251		1		0.0230755		0.596488	0.315432	0.0654123	1.99069	FALSE
IER3IP1	2		1		0.1303		1		0.131298		1		0.00951773		1		3.93027e-17		0.982295	0.0177051	1.11401e-31	0	FALSE
IFITM3	30		1		0.00503213		1		0.00384959		1		0.00451485		1		0.00495512		0.456662	0.118268	0.0671243	0.953084	FALSE
IFNAR2	3		1		0.203512		1		2.37802		0.809048		0.2907		0.815301		0.325242		0.708186	0.163717	0.0573325	1.84624	FALSE
IFNGR1	2		1		0.0959467		1		1.76365		1		0.212867		1		0.024288		0.865954	0.100158	0.0338882	1.5896	FALSE
IGFBP6	19		1		0.0534794		0	0	6.03555	1	0	0	2.29317	1	1		0.213134		0.669784	0.150868	0.0406336	0.198614	FALSE
IGFBP7	46		1		0.0614991		0	0	3.75058	1	0	0	1.44837	1	0	0	0.636431	1	0.547657	0.130254	0.0529505	2.35317	FALSE
IGLL5	3		1		0.0404815		0.614867		5.80759		0.441153		2.8469		0.529536		2.18886		0.3113	0.133618	0.0945935	0	FALSE
IKZF1	2		1		0.100061		1		0.0920197		1		0.115192		1		0.175761		0.553277	0.238845	0.132554	3.15859	FALSE
IL32	6		1		0.135431		1		0.296415		1		0.20356		1		0.226942		0.490358	0.270607	0.132392	0.885549	FALSE
IL6ST	18		0.537048		0.31015		1.77054e-05	0.02933	1.9605	0.99	1		0.439531		1		0.572188		0.398519	0.115931	0.0995484	1.40299	FALSE
ILF3	4		1		0.261793		1		0.419714		1		0.818796		1		0.392132		0.480718	0.304104	0.0914077	1.95588	FALSE
IMPDH2	22		1		0.209452		1		0.00548126		1		0.0196772		1		0.00467729		0.753237	0.112188	0.0993184	4.00294	FALSE
ISG20	34		0.95643		0.308532		0	0	3.08902	1	1		0.0569343		1		0.00970505		0.660118	0.225277	0.0317722	0.824794	FALSE
ITGA4	8		0.803324		0.399601		0.123016		1.62439		8.46299e-10	0	1.08945	1	1		0.253899		0.475732	0.188109	0.0973934	2.23955	FALSE
ITLN1	3		1		0.00173206		0.0493779	0	3.23747	1	5.31322e-13	0	1.61298	1	1		0.0754558		0.761671	0.146305	0.0789669	0.25936	FALSE
JCHAIN	4		1		0.134707		1		0.0191275		1		0.147795		1		0.0575918		0.706174	0.164316	0.126786	0	FALSE
JMJD1C	7		0.954505		0.298133		1		1.24041		1		1.04737		1		0.148544		0.419053	0.250483	0.0759318	1.43315	FALSE
JPT1	24		0.940409		0.195578		0	0.217992	2.80345	0.91	1		0.112615		1		0.0839246		0.781085	0.109859	0.0831251	0.408277	FALSE
JTB	10		1		0.426401		1		0.183658		1		0.103015		1		0.0421582		0.908482	0.0638594	0.0276585	3.40441	FALSE
KDELR1	20		1		0.186816		4.64742e-10	0	5.01042	1	1		0.0399006		1		0.0587489		0.95616	0.0278793	0.0122029	4.27717	FALSE
KIF22	2		1		0.051487		1		1.52243		1		0.350176		1		0.0737438		0.80325	0.112467	0.0809147	0.71601	FALSE
KIF2A	18		0.478463		0.271463		0.429606		2.50701		6.84083e-13	0.243127	0.927595	0.9	9.83384e-09	0	0.612341	1	0.740632	0.122234	0.0528234	0.943362	FALSE
KIF5B	32		0.719585		0.281289		1.44223e-06	0	1.58929	1	1		0.0424421		1		0.120048		0.428675	0.241416	0.109321	1.69852	FALSE
KIN	2		0.998261		0.304111		1		0.504688		0.208989		1.21549		1		0.138826		0.520806	0.320942	0.0769623	3.13414	FALSE
KLF5	7		0.475255		0.188029		1		2.30649		1		0.0668102		1		0.0234686		0.97638	0.0180964	0.00348382	1.34898	FALSE
KLK1	2		1		0.158953		1		0.129784		1		4.19271e-17		1		1.98258e-17		1	1.94101e-32	2.26511e-63	5.55112e-17	FALSE
KLRD1	4		0.188338		0.503837		1		1.70868		1		0.429906		1		0.216351		0.62432	0.125074	0.0977756	1.50151	FALSE
KRR1	6		1		0.133595		1		1.21186		1		0.201287		1		0.222009		0.53637	0.253579	0.197906	8.1611	FALSE
KRT14	2		0.661349		0.118038		4.13774e-13	0	3.13559	1	1		0.00341503		3.55491e-05	0	0.501581	1	0.337147	0.124823	0.0713195	0.739647	FALSE
KRT18	24		1		0.019887		1		0.000693777		1		0.000567737		1		0.000971194		0.430475	0.19763	0.160242	1.18286	FALSE
KRT19	19		0.398212		0.247164		0	0	3.89565	1	6.4907e-06	0	0.249698	1	0	0	0.227489	1	0.462697	0.0931813	0.0699742	0.147416	FALSE
KRT7	10		0.803324		0.122811		0	0	2.66194	1	1		0.0111956		0.0731235	0.0532794	0.491937	0.98	0.426338	0.253533	0.0716224	0.288561	FALSE
KRTCAP3	7		0.416406		0.537923		0.0236933	0.459667	1.15119	0.79	1		0.383345		0.292488		0.526703		0.549213	0.265905	0.106398	1.03646	FALSE
LAMA2	5		0.200477		0.262297		1.39853e-05	0	1.84725	1	1		0.130007		1		0.226429		0.544142	0.0739211	0.0691556	0.784453	FALSE
LAMTOR2	28		1		0.220223		1		1.45455		1		0.0611014		1		0.079181		0.785347	0.116759	0.0946797	2.82756	FALSE
LAMTOR4	3		0.156883		0.334917		1		0.157983		1		0.0992369		0.00144291	0.102412	0.457475	0.96	0.606474	0.27209	0.121436	1.76737	FALSE
LARP7	8		1		0.28903		1		0.12147		1		0.0757854		1		0.589289		0.481314	0.380721	0.0771324	3.65112	FALSE
LARS1	14		1		0.2742		0.00928312	0.217992	1.17518	0.91	3.33618e-10	0.200444	0.9683	0.92	0.00532334	0.553872	0.586849	0.75	0.524799	0.188446	0.14086	3.53671	FALSE
LCN6	7		1		0.0690466		1.98727e-05	0.175297	2.45614	0.93	0.265638		0.941829		0	0	0.800473	1	0.639378	0.177539	0.105681	0.791862	FALSE
LCP1	26		0.226405		0.239894		7.26392e-06	0.536298	2.70562	0.25	0	0.342532	0.714086	0.85	8.62588e-08	0	0.821686	1	0.717946	0.105857	0.066089	1.15538	FALSE
LDB2	5		0.672768		0.339617		1		0.222166		1		0.566746		1		0.184607		0.347012	0.134175	0.107894	1.06411	FALSE
LGALS1	78		1		0.142537		0	0	3.20266	1	0	0	0.602956	1	1		0.922492		0.897078	0.0762649	0.020959	0.191941	FALSE
LIMA1	4		1		0.252353		1		0.0456578		0.000171674	0.82	0.840921	0.4	1		0.173435		0.45958	0.298617	0.19299	1.30163	FALSE
LINC01781	3		0.518816		0.380657		1		0.215969		0.000135671	0	0.263205	1	1		8.49395e-18		0.922181	0.077819	1.19556e-32	1.7972	FALSE
LOC101928817	2		1		0.00981812		1		0.0176894		1		0.181609		1		2.38407e-18		0.732488	0.267512	5.91394e-33	0	FALSE
LOC110117498-PIK3R3	2		0.998261		0.253773		0.135216		1.63006		0.596315		0.221504		1		2.67019e-16		0.942211	0.0577892	2.72229e-33	0.592137	FALSE
LSM3	3		1		0.0464259		1		0.0462282		1		0.00465151		1		3.50247e-18		0.855145	0.144855	2.47259e-32	2.08167e-17	FALSE
LSM7	18		0.543372		0.375129		1.65194e-08	0.02933	1.81294	0.99	0.074969	0	1.04787	1	1		0.603978		0.693804	0.177732	0.10606	4.31594	FALSE
LSM8	7		0.797387		0.323556		1.01632e-06	0.02933	1.66041	0.99	1		0.187766		0.719904		0.291		0.911214	0.0677725	0.0210135	0.774384	FALSE
LUZP6	32		1		0.149991		1		0.363016		1		1.29132		1		0.00132628		0.817851	0.150381	0.0161936	0.657982	FALSE
LXN	2		1		0.170153		1		0.157959		1		0.00345851		1		0.128204		0.591419	0.351875	0.0553905	2.77556e-17	FALSE
LYAR	11		0.964065		0.315739		1		0.303074		0.477013		0.306373		1		0.194702		0.773166	0.0683549	0.0628341	0.929848	FALSE
LZIC	3		1		0.195705		1		0.140754		1		0.0854823		1		0.731165		0.401837	0.196185	0.140761	1.0415	FALSE
MACROD2	5		1		0.0639815		1		2.50256		0.888217		0.5174		1		0.0476392		0.55387	0.0978713	0.0822624	0.192477	FALSE
MACROH2A1	15		0.802839		0.276541		1		0.845614		0.000367218	0.0827523	1.27946	0.97	4.49142e-05	0.0532794	0.748787	0.98	0.328803	0.240696	0.133619	1.5109	FALSE
MAGOH	20		0.441084		0.555781		0.00239627	0.612107	1.46072	0.71	1		0.700777		1		0.136989		0.806916	0.16108	0.0154913	3.39378	FALSE
MALSU1	7		1		0.14045		1		0.174252		1		0.11244		1		0.0812873		0.603024	0.177607	0.161515	2.86629	FALSE
MAOA	4		0.326801		0.643672		1		0.251108		0.338131		0.830716		1		0.236584		0.687994	0.139933	0.0721931	1.75564	FALSE
MAP1LC3B	3		1		0.191424		1		0.135375		1		0.185398		1		0.0475992		0.697225	0.266202	0.0365732	1.80515	FALSE
MBD2	2		1		0.0979368		1		1.47541		1		0.226986		1		0.0211719		0.674411	0.184437	0.106256	1.40373	FALSE
MCOLN1	4		1		0.0590281		1		0.053843		1		0.00212973		1		1.68474e-17		0.863755	0.136245	1.2683e-32	0.517289	FALSE
MCTS1	16		0.256743		0.31226		0	0.517664	2.11778	0.76	1		0.207801		1		0.128751		0.855058	0.0740207	0.0530848	2.8854	FALSE
MCUB	8		1		0.180245		1		1.27231		1		0.279656		1		0.091195		0.418978	0.232588	0.15199	1.30037	FALSE
MCUR1	14		1		0.309871		1		0.192169		1		0.288742		1		1.09377		0.62664	0.149037	0.10011	1.71852	FALSE
MDH2	8		1		0.109215		1		0.0117737		1		0.103444		1		0.00204976		0.985748	0.0124055	0.00184663	0.832153	FALSE
MEI1	2		1		0.463146		1		0.133619		1		0.0685082		1		0.420367		0.784763	0.129499	0.0693354	1.07372	FALSE
METTL5	33		1		0.276901		1		2.05607		1		0.178464		0.000976638	0	0.459274	1	0.604072	0.179096	0.0590764	1.69572	FALSE
MFAP5	11		0.729719		0.306448		0	0	2.30921	1	0.000212274	0.0576358	0.786993	0.98	0	0	0.50977	1	0.504018	0.127194	0.0635001	1.25377	FALSE
MFSD1	4		0.670132		0.123082		1		1.36953		1		0.950355		1		0.221426		0.454919	0.230511	0.0987361	1.07057	FALSE
MGLL	9		0.631822		0.34535		1		0.183313		1		0.0293191		1		0.571864		0.73072	0.0870056	0.0585952	1.70158	FALSE
MGP	24		1		0.0686937		1		2.77046		1		0.0811338		1		0.0357592		0.70087	0.0541731	0.0286045	0.878417	FALSE
MGST3	62		1		0.208329		0	0	2.25807	1	1.88932e-08	0	0.220729	1	0	0	0.754809	1	0.550137	0.178112	0.0846993	3.19936	FALSE
MIR205HG	2		1		0.0267929		0.99231		1.54721		1		0.269576		1		0.168701		0.540197	0.201243	0.0801958	0.304247	FALSE
MIR3945HG	3		1		0.0465936		1.98776e-10	0	1.43416	1	1		0.163992		1		0.206612		0.43929	0.332352	0.106084	0.0472928	FALSE
MMP7	4		1		0.283609		1		0.29511		1		0.029847		1		1.03053e-17		0.978426	0.0215736	3.78427e-33	0.575864	FALSE
MORF4L1	15		0.133464		0.370545		0	0.480665	2.82006	0.78	0	0.107062	1.17831	0.96	1		0.118533		0.734839	0.161812	0.0503869	2.37421	FALSE
MORN5	2		1		0.046804		0.0236933	0.664745	0.947356	0.68	0.174514		1.02187		1		0.0757328		0.745657	0.244727	0.00901923	0.587774	FALSE
MPC2	17		1		0.157777		1		0.163611		1		0.0266762		1		0.00135358		0.680286	0.287345	0.0323691	3.99448	FALSE
MRC1	4		0.589758		0.252244		1		1.34839		3.27139e-06	0.526715	1.10019	0.76	1		0.225124		0.756967	0.186957	0.0315412	0.760433	FALSE
MRPL11	3		1		0.18097		1		0.0173696		1		0.179003		1		0.04861		0.707755	0.246834	0.0454106	1.10141	FALSE
MRPL13	4		1		0.212544		1		0.225874		1		0.077464		1		0.0339547		0.57352	0.376656	0.0470412	4.161	FALSE
MRPL20	5		1		0.0442965		1		0.941506		1		0.0281381		1		0.0256154		0.654508	0.201577	0.143914	2.10562	FALSE
MRPL21	31		1		0.194236		1		1.88156		1		0.299428		1		0.148652		0.599021	0.275768	0.0801064	1.66215	FALSE
MRPL37	2		1		0.0542326		1		0.0469668		1		0		1		1.09624e-18		1	5.71833e-34	1.16526e-68	2.08167e-17	FALSE
MRPL39	2		1		0.13214		1		0.0910301		1		0.13098		1		0.0224787		0.770021	0.204698	0.0252807	5.55112e-17	FALSE
MRPL47	15		1		0.246602		1		0.0323324		1		0.21667		1		0.0665841		0.483233	0.269433	0.111613	1.93242	FALSE
MRPL51	8		1		0.0966271		0.16737		2.63811		1		0.136804		1		0.042487		0.986536	0.0107993	0.00266511	0.640956	FALSE
MRPL52	37		1		0.255614		4.04385e-12	0	2.45096	1	0.14123	0.156416	1.22969	0.94	0	0	0.641525	1	0.570262	0.269763	0.050478	0.971295	FALSE
MRPL55	2		1		0.273096		1		0.0516276		1		0.0298447		1		0.0235653		0.860133	0.0561616	0.0429974	3.93108	FALSE
MRPS18C	28		1		0.215485		1		2.03537		1		0.312462		1		0.165053		0.663581	0.243255	0.0506479	1.87263	FALSE
MRPS21	4		1		0.101121		2.08083e-10	0.260561	2.25302	0.89	1		0.0998061		1		0.0772154		0.83803	0.117299	0.033121	0.70843	FALSE
MS4A4A	11		1		0.279794		1		1.30072		1		0.233244		1		0.635096		0.467242	0.290908	0.129249	2.41581	FALSE
MSLN	6		1		0.0600667		1		0.0117709		1		0.0535548		1		1.30869e-17		0.92787	0.0721299	1.53965e-32	1.38778e-17	FALSE
MSMB	7		0.42215		0.16481		1.44041e-11	0	2.89046	1	1		0.124661		0.947803		0.122464		0.887059	0.10057	0.00639652	0.860603	FALSE
MSN	17		1		0.381542		1		0.320483		1		0.258367		1		0.539167		0.419753	0.169662	0.158546	2.40291	FALSE
MSR1	3		0.150693		0.259464		1		1.14472		0.950591		1.38664		1		0.145065		0.552201	0.298188	0.0568201	0.32419	FALSE
MSRB2	7		0.340442		0.239141		1		1.75257		1		0.102667		1		0.0672111		0.772931	0.210077	0.0169917	0.460629	FALSE
MT1E	45		0.157006		0.212773		2.41657e-07	0	1.96138	1	8.18121e-08	0	0.492281	1	1		0.00787201		0.940067	0.0516954	0.00722562	1.18586	FALSE
MT1F	6		1		0.0789834		1		0.136769		1		0.122569		1		6.9195e-17		0.669643	0.330357	1.92858e-31	2.0303	FALSE
MT1H	5		0.694928		0.128323		1		1.45221		1		0.088604		1		0.0737743		0.5675	0.339537	0.0530447	0.332822	FALSE
MT1M	16		1		0.0139562		1		0.00262689		1		0.0179514		1		0.0022486		0.973555	0.0183228	0.00812221	5.20417e-18	FALSE
MT2A	83		1		0.0615654		1		0.816754		1		1.67776		1		0.01479		0.461659	0.397676	0.0423382	1.33983	FALSE
MTCH2	19		1		0.201482		0.0182107	0.612107	1.20013	0.71	0.04736	0.62133	1.09395	0.71	1		0.159655		0.673899	0.188066	0.0370282	0.965445	FALSE
MTDH	42		1		0.347667		0.231221		2.15513		0	0	0.903975	1	7.95897e-10	0	0.612384	1	0.605849	0.136669	0.0875999	1.55058	FALSE
MTSS1	3		1		0.0542041		1		2.38423		1		0.138982		1		0.0243707		0.886863	0.0648304	0.0291147	0.223947	FALSE
MTUS1	11		0.766451		0.175823		0	0.283114	2.4827	0.88	1		0.0352273		1		0.408791		0.542507	0.243099	0.0985357	0.487605	FALSE
MUC16	3		1		0.215384		1		1.28355		1		0.884675		1		0.0130236		0.679503	0.310907	0.00871936	0.499136	FALSE
MVP	3		1		0.0313882		1		0.0256284		1		1.98615e-18		1		3.32463e-19		1	1.30069e-33	2.57855e-36	2.65754	FALSE
MYL4	2		1		0.0999873		1		1.41047		1		0.02595		1		0.0218058		0.942603	0.0436165	0.0137804	0.297987	FALSE
MYL6B	2		0.613165		0.196315		1		2.3245		1		0.0653334		1		0.0695478		0.954229	0.0298709	0.0159003	1.38114	FALSE
MYL9	2		1		0.123884		1		0.141933		1		0.59377		1		0.232008		0.201593	0.100642	0.0801973	0.230429	FALSE
MYLK	3		1		0.0526863		1		0.0401342		1		0.0246967		1		2.21649e-17		0.834032	0.165968	3.27142e-31	0	FALSE
MYLPF	2		1		0.0403218		1		0.0384517		1		0.0164692		1		5.29044e-18		0.928085	0.0719153	4.10235e-33	0.142775	FALSE
NAMPT	9		1		0.0969233		1		0.107788		1		0.189704		1		0.0697245		0.885259	0.0333094	0.0297916	0.800224	FALSE
NANS	9		1		0.0855193		1		0.00571526		1		0.0166556		1		0.00997169		0.96645	0.0196536	0.00937472	2.35046	FALSE
NBDY	2		1		0.048134		1		2.05873		1		0.0411363		1		0.0196356		0.949349	0.0425724	0.00807837	0.689116	FALSE
NCOR1	21		0.744223		0.650633		1		1.26242		0.000174789	0.0827523	1.31658	0.97	1		0.581105		0.538979	0.254491	0.0870999	3.31272	FALSE
NDFIP1	20		1		0.272244		1		0.661387		1		0.303206		1		0.701843		0.443262	0.248295	0.130276	1.70533	FALSE
NDUFA11	76		1		0.0874282		0	0	3.26312	1	0	0	1.27019	1	0.413989		0.0528782		0.84728	0.144998	0.00581062	0.257241	FALSE
NDUFA12	16		1		0.0625895		1		2.41462		1		0.0658852		1		0.00326709		0.941063	0.0440495	0.00983469	0.50248	FALSE
NDUFA13	105		1		0.223089		0.440319		2.31139		0	0	0.788176	1	0.216478		0.36271		0.904497	0.0655382	0.019368	0.493128	FALSE
NDUFA2	26		1		0.21995		1		1.02986		1		0.014919		1		4.59694e-16		0.874567	0.125433	8.65105e-31	1.59712	FALSE
NDUFA7	18		1		0.081914		0	0	2.72904	1	1		0.152561		1		0.0267943		0.89268	0.0586762	0.0280889	0.876935	FALSE
NDUFAF3	18		0.856717		0.277702		0.018936	0.05642	1.39637	0.98	1		0.270759		1		1.91384e-15		0.969929	0.0300708	1.7531e-30	1.21351	FALSE
NDUFB11	55		0.148396		0.147431		1		0.323739		7.2774e-13	0	1.03253	1	0	0	0.335177	1	0.511999	0.404039	0.083962	0.762735	FALSE
NDUFB3	2		1		0.299897		1		0.296947		1		0.0483368		1		6.77297e-17		0.708808	0.291192	1.5174e-32	5.52803	FALSE
NDUFB4	20		1		0.000945799		1		0.0109408		1		0.0234888		1		0.0280486		0.425023	0.305364	0.14564	1.24196	FALSE
NDUFB6	25		1		0.325936		1		0.446663		1		0.0320276		1		0.150998		0.519007	0.389646	0.0726608	2.52508	FALSE
NDUFB8	58		0.772928		0.176339		1		2.29216		1		1.50144		1		0.0980028		0.621099	0.249882	0.0607046	0.760037	FALSE
NDUFB9	37		1		0.00535044		1		2.28216		1		0.00894268		1		0.000862574		0.990286	0.00495224	0.00394071	0.00154582	FALSE
NDUFC2	43		1		0.0545706		1		0.0498159		1		2.89797e-05		1		1.45013e-16		0.997167	0.00283343	8.88649e-30	2.77556e-17	FALSE
NDUFS2	20		1		0.0249591		1		0.186638		1		0.0016881		1		0.00166283		0.495059	0.264569	0.157104	2.18723	FALSE
NDUFS3	17		0.327679		0.15552		1		1.71695		1		0.152443		1		0.0567762		0.865826	0.0812434	0.0475387	1.27954	FALSE
NDUFS4	21		1		0.37771		0.000319133	0.129322	4.30263	0.95	0.000122911	0.131487	1.40728	0.95	1		0.0634053		0.756908	0.222432	0.00893888	2.12959	FALSE
NDUFS5	58		1		0.00493013		0	0	5.90438	1	1		0.117773		1		0.0652649		0.979811	0.00942044	0.00526434	0.00564155	FALSE
NDUFV1	21		1		0.122623		1		0.123447		1		0.0323546		1		1.78727e-16		0.968424	0.0315755	1.07943e-30	0.0610114	FALSE
NDUFV2	79		1		0.123893		1		2.24542		1		0.0616957		0	0	0.553438	1	0.93283	0.0213828	0.0159509	0.759724	FALSE
NEDD8-MDP1	3		1		0.308195		1		0.082958		1		0.384215		1		0.156543		0.883645	0.0738428	0.0235883	1.52987	FALSE
NEMF	6		1		0.294757		0.118168	0.555732	2.29742	0.74	1		0.51104		0.0228047	0.0282403	0.298298	0.99	0.609675	0.124843	0.0563361	2.09423	FALSE
NFIB	2		1		0.256394		0.308087		0.390214		0.924741		0.933294		0.699036		0.266161		0.454344	0.240085	0.14683	0.787005	FALSE
NFIC	9		0.703043		0.514764		0.236284		0.706288		0.140984	0.322143	0.601744	0.86	1		0.745604		0.449884	0.326348	0.201299	1.4454	FALSE
NFIX	2		1		0.13574		0.00390371	0.106968	1.40951	0.96	0.653731		0.238178		1		0.39786		0.642012	0.178787	0.154904	0.184984	FALSE
NFU1	2		1		0.086286		1		1.31949		1		0.643999		1		0.0367088		0.520915	0.283656	0.0988584	2.14969	FALSE
NIFK	7		1		0.172352		0.000357549	0.02933	1.62856	0.99	8.18121e-08	0	0.316387	1	1		0.107236		0.664182	0.147725	0.0771525	1.21013	FALSE
NKAP	3		1		0.134254		1		0.13258		1		0.0212627		1		3.58664e-18		0.984895	0.0151046	2.90882e-31	6.29736	FALSE
NME1-NME2	5		1		0.0782237		1		0.0105361		1		0.0695946		1		0.0199917		0.984065	0.0103402	0.00559494	3.06887	FALSE
NOP56	3		1		0.113228		1		0.112113		1		0.0294041		1		8.17858e-17		0.99689	0.00311037	9.22744e-32	0.0579279	FALSE
NOP58	4		1		0.175848		0.551888		1.72531		8.7125e-05	0.284094	0.789602	0.88	1		0.380332		0.548868	0.202179	0.181457	1.86388	FALSE
NOSTRIN	3		1		0.11427		0.273427		1.73926		1		0.0500971		1		0.137935		0.64997	0.143392	0.11714	1.04424	FALSE
NPC2	31		1		0.359326		0	0	1.23954	1	0	0	3.31234	1	1		0.115747		0.61689	0.349105	0.0161722	1.88308	FALSE
NSA2	18		1		0.121036		0	0.439405	3.42714	0.8	3.29839e-05	0	0.714628	1	1		0.203509		0.919473	0.0385799	0.0237426	0.838141	FALSE
NSMCE4A	5		0.534508		0.368411		0.0399738	0.129322	2.55076	0.95	8.35747e-08	0.0302685	1.34963	0.99	1		0.147256		0.517931	0.207337	0.153853	1.085	FALSE
NSRP1	4		0.810566		0.214968		0.486201		1.69646		1		0.407215		1		0.47995		0.407126	0.212767	0.174609	0.938796	FALSE
NTHL1	3		1		0.217163		1		0.00932666		1		0.182811		1		0.117132		0.510045	0.319235	0.17072	2.45732	FALSE
NUB1	2		1		0.185714		1		2.00266		1		0.379785		1		0.275392		0.700007	0.138833	0.0850506	1.70888	FALSE
NUCB2	29		0.248252		0.171022		2.63008e-07	0	2.39614	1	1		0.882723		0.00672821	0.124151	0.389481	0.95	0.494284	0.196217	0.0973578	1.90315	FALSE
NUCKS1	77		0.810566		0.365213		0	0	3.6354	1	0.718021		1.73524		0	0	1.10121	1	0.685702	0.205584	0.0686161	0.729767	FALSE
NUDT5	5		1		0.247915		1		1.17088		1		0.405617		1		0.469216		0.473794	0.209842	0.177009	2.05598	FALSE
ODF3B	2		1		0.230981		1		0.230976		1		0.00179109		1		3.27655e-17		0.957519	0.042481	6.11495e-33	3.70041	FALSE
OGFRL1	2		0.132646		0.346873		0.000742402	0	1.1276	1	1		0.739701		0.360689		0.436756		0.504895	0.414112	0.0615386	1.11364	FALSE
OLFM4	3		1		0.0999755		1		0.0894208		1		2.70829e-17		1		1.3509e-18		1	7.51681e-32	6.86826e-63	2.77556e-17	FALSE
OPTN	7		0.484338		0.332744		1		0.690943		0.000175173	0	0.918331	1	1		0.329088		0.484015	0.154021	0.103055	2.45207	FALSE
OSBPL1A	6		0.375772		0.299718		1		0.12659		1		0.206991		1		0.16369		0.425965	0.27746	0.0882288	1.48973	FALSE
OSBPL9	2		1		0.0620441		1		1.88237		1		0.0259586		1		0.218596		0.793694	0.0827775	0.0715911	0.613887	FALSE
OST4	60		1		0.0214762		1		0.0298005		1		0.0212423		1		1.55665e-16		0.815905	0.184095	6.7016e-30	0.0311307	FALSE
OSTF1	4		1		0.317559		1		0.317148		1		0.0181594		1		0.020073		0.658077	0.3185	0.0221159	1.96105	FALSE
PAFAH1B1	2		1		0.142393		1		1.78991		1		0.16311		1		0.181592		0.730371	0.204595	0.0441013	0.744823	FALSE
PAK1IP1	2		1		0.019456		1		1.136		1		0.17324		1		0.118656		0.412684	0.21474	0.113981	3.54009	FALSE
PALMD	9		0.424064		0.262824		0	0.217992	2.86704	0.91	0	0	1.16626	1	1		0.00282558		0.80473	0.159662	0.0189448	0.453479	FALSE
PAPOLA	20		0.77304		0.377188		0.208831		0.813337		1		0.0346357		1		0.103918		0.348678	0.219059	0.14785	3.78741	FALSE
PARK7	6		1		0.344422		1		0.0550316		1		0.29155		1		0.0718475		0.745607	0.15758	0.0800468	1.31413	FALSE
PAXX	4		1		0.199097		1		0.146753		1		0.176964		1		8.40238e-17		0.641292	0.358708	2.96585e-32	1.04435	FALSE
PBDC1	2		1		0.286392		1		0.264494		1		0.207702		1		0.0396209		0.744765	0.213809	0.0414258	0.537198	FALSE
PCED1B-AS1	2		0.77304		0.239208		1		0.35944		0.786287		0.280516		1		0.263845		0.278863	0.199705	0.179942	1.50787	FALSE
PDCD5	55		0.728015		0.181386		0	0	1.98657	1	0.00385637	0.486373	1.21931	0.78	0	0	0.807066	1	0.527009	0.329253	0.0853677	2.43803	FALSE
PDGFA	2		1		0.347425		1		0.151744		1		0.299117		1		0.139208		0.564983	0.226501	0.158255	3.75417	FALSE
PDGFRA	3		1		0.145556		0.0189994	0.239757	1.46738	0.9	1		0.22748		1		0.0116571		0.558835	0.270136	0.142793	0.0661961	FALSE
PDIA3	17		0.587616		0.285183		0	0	1.99674	1	6.51807e-10	0	0.996673	1	0.00264767	0.614133	0.605218	0.72	0.655347	0.231939	0.0743057	1.85624	FALSE
PDXK	4		1		0.214838		1		0.0479254		1		0.190174		1		2.80333e-17		0.995238	0.00476185	1.23176e-32	0.691465	FALSE
PEBP4	4		1		0.153682		5.95079e-07	0.260561	1.7982	0.89	3.68406e-10	0.322143	0.802892	0.86	1		0.0680722		0.579491	0.280523	0.0950259	0.289352	FALSE
PECAM1	5		1		0.202046		0.00712224	0.705053	1.66724	0.66	1		0.050239		1		0.172609		0.381823	0.143353	0.135391	1.97461	FALSE
PET100	2		1		0.127263		1		1.63517		1		0.31592		1		0.0105407		0.729062	0.24558	0.016415	1.5718	FALSE
PEX16	5		0.982429		0.15491		1		1.67631		1		0.0257325		1		0.0425654		0.800789	0.11835	0.0618015	2.34225	FALSE
PF4	5		0.805074		0.137161		1		1.86939		1		0.00298576		1		9.67027e-16		0.992426	0.00757411	2.69058e-31	0.274517	FALSE
PFDN2	5		1		0.215432		1		0.0605554		1		0.121877		1		0.13641		0.925079	0.0668012	0.00811976	1.75408	FALSE
PFN1	56		1		0.0101365		0	0	3.88637	1	1		0.0635777		0	0	0.460102	1	0.948428	0.0166639	0.00986979	0.012692	FALSE
PGC	9		1		0.0264935		8.59721e-07	0	3.27439	1	1.53503e-08	0.107062	0.947288	0.96	1		0.0268103		0.596393	0.066104	0.0395574	0.938383	FALSE
PGLS	3		1		0.155789		1		0.156849		1		0.0403266		1		1.77998e-17		0.952588	0.0474122	4.39438e-34	1.0238	FALSE
PHGR1	10		1		0.148996		1		0.1284		1		0.0755045		1		0.00825838		0.488479	0.461358	0.050163	2.77556e-17	FALSE
PIGR	6		0.512771		0.370279		1		0.7881		1		0.258893		1		0.434646		0.749141	0.175954	0.0286038	0.673923	FALSE
PLA2G1B	2		1		0.454731		1		0.463444		1		0.0273962		1		7.75537e-16		0.935933	0.0640673	2.94908e-30	0	FALSE
PLA2G7	2		1		0.376366		1		0.231515		1		0.276022		1		0.102406		0.481917	0.286762	0.214412	0	FALSE
PLAAT3	7		1		0.0926801		1		0.0301297		1		0.0190809		1		0.136424		0.969992	0.024653	0.00535488	0.66314	FALSE
PLAC8	10		1		0.252656		1		0.65929		1		1.2456		1		0.0583544		0.503256	0.323898	0.133188	2.38242	FALSE
PLAC9	20		1		0.0207793		1		2.02848		0	0	0.219334	1	1		0.0409764		0.949481	0.0240527	0.0119006	0.327636	FALSE
PLAUR	2		1		0.294713		0.78445		2.31417		0.713593		0.66669		1		0.246311		0.697585	0.200628	0.0587534	0.774319	FALSE
PLEKHA3	2		0.471552		0.161958		0.0043844	0	1.43032	1	1		0.0655643		1		0.0251835		0.682645	0.293277	0.0182314	1.74257	FALSE
PLEKHA5	4		1		0.0788474		0	0.402193	2.02556	0.82	1		0.00400628		0.000164455	0.596174	0.615952	0.73	0.502083	0.282558	0.0877721	2.93139	FALSE
PLEK	9		1		0.221504		1		0.0597025		1		0.0453082		1		0.0726236		0.96266	0.021488	0.010322	1.44997	FALSE
PMPCB	12		1		0.127269		1		1.00338		1		0.855397		1		0.0897786		0.520376	0.37621	0.0449213	1.6419	FALSE
PNISR	9		1		0.256371		1		0.694605		0.162123		1.37356		1		0.230936		0.48334	0.233129	0.0802188	2.11438	FALSE
PNN	29		0.45137		0.30369		1		1.5177		1		1.1346		4.41134e-10	0	0.763877	1	0.523531	0.228528	0.0768393	1.19694	FALSE
PNRC2	2		1		0.218346		1		0.14478		1		0.184328		1		9.82263e-17		0.847298	0.152702	6.42008e-31	14.6752	FALSE
POLD2	3		1		0.272773		1		0.287542		1		0.117747		1		0.0247602		0.445169	0.331958	0.167477	2.45565	FALSE
POLR2F	26		1		0.0133337		0	0.02933	3.08796	0.99	0	0.546005	0.52411	0.75	1		0.027957		0.964024	0.0286643	0.00461944	0.566124	FALSE
POLR2G	2		1		0.0446322		1		0.036442		1		1.34428e-17		1		2.53639e-19		1	1.05585e-31	2.05116e-35	2.08167e-17	FALSE
POLR2J	11		1		0.0300692		1		0.0245514		1		6.22827e-17		1		9.24762e-19		1	6.32337e-30	7.46076e-60	6.93889e-18	FALSE
POLR2L	11		1		0.0619893		1		0.0554449		1		2.04892e-17		1		2.52726e-17		1	2.1818e-31	1.64985e-61	2.08167e-17	FALSE
POLR3GL	7		1		0.213245		1		0.471414		1		0.00569248		1		0.146346		0.77477	0.181594	0.039063	1.67618	FALSE
PPA2	12		1		0.0654647		1		0.00753306		1		0.0111515		1		0.0249584		0.923225	0.0260099	0.0231415	0.946619	FALSE
PPBP	2		1		0.0811641		1		0.0662702		1		1.17048e-17		1		1.29142e-17		1	1.18755e-31	1.43735e-63	0.688993	FALSE
PPFIBP1	9		0.209367		0.383078		1.44647e-06	0.439405	2.48366	0.8	0.400284		0.65364		6.2082e-14	0.0282403	0.950507	0.99	0.620587	0.151136	0.101689	1.05158	FALSE
PPIB	36		1		0.0459597		1		0.00505283		1		0.0072245		1		0.00373775		0.522437	0.201322	0.1376	0.803176	FALSE
PPIG	43		1		0.300075		1		1.96941		1		0.970519		1		0.559774		0.512204	0.272873	0.079532	1.20592	FALSE
PPM1G	20		1		0.304044		0.000486913	0.304277	4.14127	0.87	0.570198		0.354874		3.32554e-14	0.124151	1.18082	0.95	0.629517	0.208428	0.124402	0.900555	FALSE
PPP1R14A	16		1		0.0575921		1		2.5518		1		0.018471		1		0.00700227		0.97404	0.0144266	0.00596532	0.22095	FALSE
PPP1R14B	18		1		0.0511663		1		0.00159568		1		0.00251073		1		0.00292068		0.569466	0.375482	0.0476423	6.33354	FALSE
PPP1R7	7		1		0.197537		1		1.19679		1		0.127263		1		0.224495		0.453464	0.225416	0.158872	0.775843	FALSE
PRDX1	48		1		0.161533		1		1.20376		0	0.448756	1.31941	0.8	1		0.0397015		0.660878	0.184657	0.0439209	1.1585	FALSE
PRDX2	15		1		0.157993		1		0.0261584		1		0.16391		1		0.0546431		0.515516	0.466168	0.0183168	0.108745	FALSE
PRDX6	26		1		0.0788375		1		0.0749758		1		0.000408321		1		0.0133945		0.427791	0.302873	0.250384	3.18561	FALSE
PRKAR2B	5		0.170365		0.297329		1		0.984894		0.287999		0.799335		1		0.236091		0.597338	0.232162	0.128002	0.270342	FALSE
PRKDC	12		0.158541		0.178929		1		1.62158		1		0.027288		1		0.0886245		0.790291	0.13344	0.0626873	0.404243	FALSE
PRPF40A	10		0.954505		0.266927		1		1.35122		1		0.487797		1		0.330488		0.363419	0.195819	0.129171	2.09844	FALSE
PSMA2	26		1		0.0172689		1		0.0163334		1		0.00580849		1		2.95781e-16		0.999988	1.22352e-05	3.40722e-29	3.46945e-18	FALSE
PSMA4	21		1		0.222229		1		0.00468201		1		0.0558637		1		0.220097		0.359864	0.262372	0.208121	3.28932	FALSE
PSMB10	28		0.127745		0.245745		1		0.130089		1		1.50838		1		0.00767764		0.556824	0.428729	0.0131946	0.542097	FALSE
PSMB2	20		1		0.190741		1		0.824868		1		1.16429		1		0.000253252		0.758939	0.234659	0.00523749	1.59394	FALSE
PSMC3	28		0.143043		0.309781		0	0	2.93495	1	0	0	1.15359	1	1		0.0977353		0.653695	0.18627	0.0531225	0.816658	FALSE
PSMD12	3		1		0.0673841		0.00356649	0.325108	1.71999	0.86	0.000384974	0.926161	0.411412	0.54	0.000597885	0.98	0.353134	0.51	0.800977	0.111336	0.0810944	0.840989	FALSE
PSMD8	28		1		0.121438		1		1.78696		1		0.0250832		1		0.0795114		0.863499	0.069632	0.059813	0.726943	FALSE
PSME2	77		1		0.153518		1		2.25671		0	0	0.325335	1	1		0.0773934		0.938548	0.0232534	0.0171494	0.516477	FALSE
PSMG2	4		1		0.111456		1		0.0626426		1		0.00704373		1		0.0301424		0.805268	0.193398	0.00133386	0.0585512	FALSE
PSMG4	3		1		0.193789		1		0.191918		1		0.127595		1		0.0281259		0.685964	0.312825	0.00121097	1.33092	FALSE
PTMS	6		0.373067		0.301275		1		1.95495		1		0.0676581		1		0.0588688		0.831831	0.044632	0.0336013	0.959045	FALSE
PTP4A2	12		1		0.248135		1		0.264869		1		0.292716		1		0.0852153		0.347765	0.18864	0.173444	2.81505	FALSE
PTPN1	8		1		0.103989		1		0.104126		1		0.0100335		1		4.4375e-17		0.952858	0.0471418	2.6482e-31	0.0418217	FALSE
PTPN6	12		1		0.144396		1		1.79814		1		0.236678		1		0.0640608		0.732965	0.146133	0.0547779	0.700574	FALSE
PTTG1IP	14		0.395866		0.412596		0	0	2.52989	1	1		0.263143		1		0.0657916		0.790747	0.0951107	0.0735089	2.20119	FALSE
PTTG1	16		1		0.0685746		1		0.0684662		1		0.017695		1		6.85152e-18		0.979288	0.0207125	5.38308e-32	0.0373551	FALSE
PWP1	3		1		0.140351		1		0.141919		1		0.0112972		1		1.22602e-17		0.988592	0.0114079	2.72974e-32	0.0629104	FALSE
QARS1	12		1		0.220841		1		1.60218		1		0.0316486		1		0.0132777		0.847533	0.142492	0.00712121	2.19568	FALSE
QKI	2		1		0.132546		1		1.42505		1		0.0558486		1		0.145443		0.566414	0.292868	0.0648109	4.79689	FALSE
RAB11A	2		1		0.0876904		1		0.429549		1		0.767378		1		0.0477258		0.713917	0.234612	0.0506261	2.45184	FALSE
RAB11FIP1	9		0.154562		0.294544		9.04313e-06	0.779792	1.9821	0.62	1		0.404682		1		0.223943		0.747523	0.187992	0.048392	1.37664	FALSE
RAB13	3		1		0.142402		1		0.24735		1		0.256505		1		0.0931738		0.690489	0.299317	0.0101938	0.186848	FALSE
RAB14	2		1		0.0762493		1		0.0622573		1		3.53258e-18		1		9.86924e-18		1	3.40585e-32	2.88416e-64	1.38778e-17	FALSE
RAB2A	49		1		0.197808		0.116493	0	2.30979	1	0	0	0.593561	1	1		0.280861		0.80142	0.0781412	0.0463377	0.7688	FALSE
RAC1	57		1		0.032972		1		0.000369777		1		0.00954877		1		0.0014221		0.477507	0.384086	0.0663368	1.38676	FALSE
RAD23A	12		1		0.0452346		1		0.0341463		1		0.356526		1		0.132761		0.423144	0.401184	0.175672	1.0743	FALSE
RALBP1	4		1		0.190555		7.18256e-05	0.944796	2.12841	0.53	1		0.104686		0.533805		0.278069		0.832143	0.153609	0.0142478	0.934381	FALSE
RALGPS2	2		1		0.24271		0.921695		1.29892		1		0.560536		1		0.328903		0.604012	0.158019	0.107333	1.56628	FALSE
RANBP1	18		0.605629		0.367544		4.66491e-16	0.05642	1.74105	0.98	1		0.452792		0.000310651	0.0282403	0.423013	0.99	0.839201	0.128102	0.0317688	1.87607	FALSE
RARRES1	12		1		0.218503		0.0119025	0.555732	2.48238	0.74	4.7576e-14	0	0.704673	1	0.814229		0.405169		0.711413	0.147266	0.0961031	0.520985	FALSE
RARRES2	25		1		0.0843878		1		2.13938		1		0.0697028		1		0.0855891		0.872472	0.0616848	0.0301225	0.378883	FALSE
RASGRP2	4		0.225148		0.309431		7.70928e-10	0.19659	2.63741	0.92	1		0.162369		1		0.104012		0.662431	0.183653	0.0916057	1.89995	FALSE
RASSF4	8		1		0.151955		1		0.027518		1		0.143856		1		0.0016901		0.354794	0.305504	0.175768	2.77556e-17	FALSE
RBIS	30		1		0.330404		1		0.073842		1		0.305394		1		0.159226		0.814795	0.169255	0.0159494	1.47902	FALSE
RBM27	2		0.998261		0.117976		1		1.15264		1		0.577121		1		0.233254		0.446814	0.325143	0.182536	1.874	FALSE
RBM8A	33		1		0.130696		1		0.00195656		1		0.129531		1		0.0191003		0.557105	0.358208	0.0846874	1.66007	FALSE
RBP1	11		1		0.197108		1		0.702872		1		0.197741		1		0.111122		0.678957	0.266412	0.0546312	4.51816	FALSE
RBP2	2		1		0.0839619		1		0.0228829		1		0.100224		1		0.0551777		0.999292	0.00043601	0.000271583	1.11382	FALSE
RBPJ	2		0.611445		0.175727		1		0.919263		1		1.24321		0.51204		0.235665		0.487551	0.25428	0.0843907	2.15211	FALSE
RBPMS	7		0.684296		0.134335		5.55304e-09	0.02933	2.08929	0.99	2.44387e-08	0	0.816073	1	0.815301		0.44817		0.595825	0.158646	0.106157	0.542662	FALSE
RBX1	80		1		0.173605		1		1.10821		1		1.44452		1		0.284398		0.602825	0.290841	0.0482909	0.913973	FALSE
REG1A	5		1		0.0943886		0	0	3.55217	1	1		0.108058		1		0.0783744		0.997472	0.00208152	0.000446382	0.100764	FALSE
REL	8		0.941328		0.315264		1		0.688491		1		1.18167		1		0.245332		0.704307	0.226307	0.0349223	2.89638	FALSE
RER1	21		0.147535		0.354903		0	0	2.7881	1	0.0227625	0.656385	0.514197	0.31	1		0.0972174		0.657987	0.159942	0.0837254	4.02867	FALSE
RETN	5		0.952121		0.0930578		1		1.49019		1		0.0349527		1		0.000335152		0.921978	0.0758994	0.00212312	0.313465	FALSE
RFC1	10		0.751334		0.327424		1		0.95573		0.424876		0.900974		0.183992	0.0532794	0.420832	0.98	0.475453	0.207249	0.193475	1.77985	FALSE
RFC4	2		1		0.167653		1		1.16203		1		0.391275		1		0.104079		0.364477	0.281375	0.239423	2.1707	FALSE
RFXANK	3		1		0.166091		1		0.165927		1		0.00738195		1		5.28783e-17		0.827348	0.172652	5.84779e-33	2.03461	FALSE
RGS10	2		1		0.0282159		0.148867		1.84243		1		0.068758		1		0.153208		0.713541	0.265144	0.0125194	0.758949	FALSE
RHCE	2		0.680948		0.125678		1		0.194766		0.396275		0.670521		1		0.400984		0.660331	0.196125	0.0868465	0	FALSE
RHOA	2		1		0.273904		1		0.182181		1		1.14075		1		0.0252975		0.599812	0.15771	0.0518378	2.99898	FALSE
RHOBTB3	3		1		0.188583		1		0.000221778		1		0.00273917		1		0.177341		0.5616	0.239396	0.149114	2.0087	FALSE
RHOQ	2		1		0.350654		1		0.321506		1		0.12529		1		0.176134		0.373005	0.307509	0.24211	1.55497	FALSE
RIPOR2	4		1		0.484531		0.0806831	0.260561	0.870872	0.89	1		0.352437		1		0.125954		0.46353	0.292815	0.10851	2.86373	FALSE
RMDN1	4		1		0.41363		0.0663639	0.646243	2.06712	0.69	1		0.230208		1		0.183752		0.545015	0.198339	0.0889087	2.25227	FALSE
RNASEH2B	10		0.597822		0.491509		0.678935		1.84043		6.65451e-07	0.94	1.15217	0.47	1		0.0933247		0.735603	0.189876	0.0399813	1.72564	FALSE
RNASEH2C	2		1		0.0613909		1		0.0531661		1		1.48664e-17		1		2.52879e-18		1	3.55179e-32	8.87619e-35	2.08167e-17	FALSE
RNASEK-C17orf49	3		1		0.420317		1		0.389744		1		0.0716699		1		2.26672e-17		0.68161	0.31839	2.2857e-32	1.39974	FALSE
RNF114	3		1		0.131599		1		0.122383		1		0.0246542		1		0.0417738		0.528424	0.456742	0.0144705	4.69587	FALSE
RNF130	25		1		0.160377		1		1.52544		1		0.500715		1		0.636682		0.518694	0.225687	0.1574	0.978128	FALSE
RNF13	2		1		0.0253433		1		0.0999143		1		0.00582572		1		0.126819		0.305542	0.285703	0.244958	5.89806e-17	FALSE
ROCK1	5		1		0.168161		0.164077		1.34308		0.14563	0.546005	0.292988	0.75	1		0.29606		0.63034	0.148369	0.0973159	1.54425	FALSE
ROMO1	28		0.170098		0.437232		0.7573		0.300458		0.0954804	0.94	0.357093	0.53	1		1.04837e-15		0.587092	0.412908	3.39442e-30	1.53864	FALSE
RPL15	75		1		0.046542		1		0.00150077		1		0.000495553		1		0.00170753		0.450294	0.136754	0.132776	0.0397076	FALSE
RPL18A	151		1		0.0676776		0	0	3.9695	1	0	0	0.790909	1	0	0	0.517428	1	0.674332	0.321295	0.00271898	0.0832477	FALSE
RPL21	147		1		0.0421153		0	0	4.24641	1	1.07265e-05	0	0.167362	1	1		0.0320936		0.697998	0.138621	0.0854772	0.1568	FALSE
RPL22	49		1		0.0399492		1		0.00289777		1		0.00769558		1		0.00751679		0.53962	0.446281	0.00824991	2.77833	FALSE
RPL28	150		1		0.0523315		0	0	2.32293	1	1		0.423599		0.0837944	0	0.047252	1	0.5074	0.220327	0.0511801	0.339192	FALSE
RPL30	152		1		0.0628409		0	0	3.50799	1	0	0	1.28035	1	0	0	0.823619	1	0.718157	0.106713	0.0711016	0.148918	FALSE
RPL35	121		0.90709		0.105579		1		0.0403413		1		0.00476418		1		0.00395217		0.259126	0.214001	0.112854	0.255314	FALSE
RPL38	139		1		0.0289855		0	0	2.57496	1	0	0	1.73653	1	0	0	0.275896	1	0.704474	0.274358	0.0154534	0.210199	FALSE
RPL8	147		1		0.0648821		0	0	4.84575	1	0	0	2.94725	1	1		0.518638		0.327879	0.198016	0.089694	0.511142	FALSE
RPL9	150		1		0.0885863		1		0.0100223		1		0.00324397		1		0.00473724		0.298936	0.289523	0.239738	0.0740246	FALSE
RPS15	146		1		0.0057709		0	0	3.80665	1	1.08771e-08	0	0.0574781	1	0	0	0.471519	1	0.968466	0.0220712	0.00471583	0.131756	FALSE
RPS25	110		1		0.210513		1		0.405223		0	0	5.81553	1	0.152979	0	0.127415	1	0.772616	0.154212	0.0316827	1.6167	FALSE
RPS27L	62		1		0.400873		0.000320954	0.19659	6.80482	0.92	9.87411e-07	0.0302685	0.954875	0.99	1		0.0110776		0.947615	0.0489198	0.00321094	1.62442	FALSE
RPS29	109		1		0.00665469		1		0.000934438		1		0.000220343		1		0.000497244		0.507951	0.309705	0.171612	1.73472e-18	FALSE
RPS3A	147		1		0.050011		0	0	9.29847	1	1		0.00115099		1		0.20027		0.466883	0.185249	0.0899875	0.329467	FALSE
RPS4X	152		1		0.0508215		0	0	11.5283	1	1		0.0210573		1		0.0287305		0.276973	0.203369	0.0690985	0.89819	FALSE
RSL1D1	36		1		0.269505		0	0	1.03772	1	0.582535		0.329468		1.13179e-10	0.965872	0.355129	0.52	0.390747	0.225554	0.18132	0.619991	FALSE
RSPH9	2		0.599524		0.20365		1		1.59059		1		0.262685		1		0.106891		0.687558	0.158197	0.0890604	0	FALSE
RTF1	7		0.793889		0.493284		1		1.35055		0.021432	0.177859	1.18176	0.07	1		0.0547244		0.659346	0.249891	0.044705	1.81417	FALSE
RTN4	6		1		0.331126		1		1.03083		0.227439		1.49821		9.17802e-05	0.40701	0.69445	0.82	0.437093	0.29534	0.109172	1.45485	FALSE
RTRAF	10		1		0.25921		1		0.276039		1		0.0356623		1		0.0652041		0.70258	0.175573	0.0863684	1.55119	FALSE
RUFY1	2		0.823272		0.0476816		0.0463905	0.628723	2.23478	0.7	0.391901		0.582247		0.0506766	0	0.249998	1	0.679397	0.142702	0.0780799	1.20229	FALSE
RUVBL2	3		1		0.000389256		1		0.00760441		1		0.0134683		1		0.0352861		0.59426	0.383623	0.0176749	1.49212	FALSE
S100A10	24		0.129841		0.0940333		1		0.00458179		1		0.00483032		1		0.00381436		0.542974	0.0996691	0.0690411	3.24222	FALSE
S100A12	7		1		0.0118224		1		0.0101001		1		0.00167747		1		1.91515e-17		0.970968	0.0290318	2.09539e-30	3.46945e-18	FALSE
S100A2	7		1		0.0154561		0.0661382	0.0824651	0.145627	0.97	1		0.0272558		1		0.0240512		0.232815	0.181867	0.142707	0.813584	FALSE
S100A4	65		1		0.200233		0	0	5.85496	1	1		0.0396805		1		0.0507913		0.969831	0.00873582	0.00869881	0.613067	FALSE
S100P	5		1		0.0201026		1		0.0272766		1		0.00538977		1		9.9915e-19		0.796798	0.203202	1.93443e-31	6.93889e-18	FALSE
SAMHD1	6		1		0.321386		0.747266		1.6391		0.477013		0.57216		1		0.464589		0.466846	0.122446	0.107816	1.72302	FALSE
SAMSN1	2		1		0.0370608		1		0.0464782		1		0.0745452		1		0.0724353		0.586369	0.239012	0.174619	2.61943	FALSE
SAP18	12		1		0.168222		1		1.66773		1		0.0841351		1		0.00353455		0.726578	0.214603	0.0295257	2.65051	FALSE
SAP30	2		0.77918		0.138647		1		1.22457		0.257935		0.86997		1		0.264753		0.652168	0.29179	0.0365175	0.950393	FALSE
SAR1A	5		0.939427		0.360048		1		1.3852		1		0.148507		1		0.0873628		0.727885	0.118393	0.082358	0.606772	FALSE
SBDS	6		1		0.217363		1		1.43964		1		0.72815		1		0.0193467		0.722758	0.239406	0.0251312	1.69083	FALSE
SCGB1A1	7		0.130516		0.2396		1		2.36058		1		0.346818		1		0.0732088		0.749098	0.159554	0.0486696	0.69808	FALSE
SCGB3A1	9		1		0.00950188		0.00862532	0.02933	4.91499	0.99	7.33928e-08	0	4.53895	1	1		0.0582833		0.80654	0.148416	0.0215748	0.0561637	FALSE
SCGB3A2	6		1		0.00710973		1		0.00550538		1		0.00974113		1		1.27835e-17		0.58913	0.41087	1.64573e-30	1.73472e-18	FALSE
SCP2	4		1		0.217744		1		0.217732		1		0.0164481		1		1.13889e-18		0.973751	0.0262493	7.61421e-34	0	FALSE
SCRG1	2		1		0.106		1		0.0917985		1		3.95836e-18		1		1.38067e-17		1	1.414e-32	1.24549e-34	4.16334e-17	FALSE
SDAD1	2		1		0.287092		1		0.0331685		1		0.278301		1		0.0111093		0.450626	0.313632	0.166762	4.25622	FALSE
SDHB	16		1		0.189208		1		1.94027		1		0.938072		1		0.0925304		0.717911	0.200903	0.0599141	0.601568	FALSE
SEC11C	38		1		0.296536		0	0	4.50859	1	0	0	1.51102	1	1		0.106099		0.696128	0.226996	0.0463735	1.88221	FALSE
SEC31A	3		0.24387		0.342094		1		0.277478		1		0.128371		0.154473	0	0.527915	1	0.374831	0.244736	0.122447	2.44351	FALSE
SEC61B	2		1		0.0982946		1		0.0802572		1		2.05093e-17		1		6.28032e-18		1	3.85671e-32	2.70786e-33	2.77556e-17	FALSE
SEC63	6		1		0.188354		1		0.505584		1		0.482537		1		0.151712		0.626373	0.217146	0.0786659	2.27731	FALSE
SELENOK	6		0.544222		0.284465		3.699e-15	0.152516	1.42632	0.94	0.23506		0.359726		1		0.310568		0.589551	0.38392	0.0265294	0.773313	FALSE
SELENOM	6		1		0.0223859		1		0.018278		1		3.12905e-17		1		9.05118e-19		1	2.50965e-30	2.76245e-59	6.93889e-18	FALSE
SELENOS	3		1		0.138107		1		0.0285876		1		0.126986		1		0.00340926		0.711655	0.249935	0.03841	2.10825	FALSE
SENP6	4		0.676926		0.440475		0.000732937	0.19659	1.78699	0.92	0.0229185	0.200444	0.674672	0.92	1		0.291113		0.542432	0.144884	0.0901199	1.52619	FALSE
SEPTIN10	3		0.900415		0.204327		0.031821	0.129322	1.45657	0.05	1		0.234846		1		0.227735		0.373392	0.246765	0.118351	1.92324	FALSE
SEPTIN6	8		0.723267		0.234512		1		1.45526		1		0.0493286		1		0.0132931		0.822972	0.167014	0.0100144	1.94509	FALSE
SERBP1	27		0.824839		0.266751		1		0.163536		9.60592e-10	0.107062	1.31368	0.96	6.02333e-06	0.124151	0.62636	0.95	0.548902	0.217914	0.134189	0.913047	FALSE
SERP1	48		1		0.0239734		1		2.17282		1		0.0197217		1		0.00432879		0.980353	0.0104146	0.00507574	0.777574	FALSE
SERPINB13	3		1		0.106915		1		2.49972		1		0.129625		1		0.0833145		0.782965	0.0992883	0.0637036	0.59532	FALSE
SERPINB1	25		1		0.254577		1		0.701777		6.08819e-08	0.0827523	1.69976	0.97	0.00124593	0.670987	0.594809	0.69	0.523403	0.269565	0.0708316	1.28022	FALSE
SERPINB3	7		0.768334		0.109683		1		2.78288		1		0.0670661		0	0	0.466595	1	0.928323	0.0374997	0.0197935	0.246568	FALSE
SERPINB4	4		0.550531		0.0895685		1		3.03014		1		0.0999648		2.56762e-06	0.0532794	0.282531	0.98	0.89466	0.0626357	0.0397456	0.431029	FALSE
SERPINE1	5		1		0.0676076		1		0.0100781		1		0.0761611		1		0.00415903		0.691233	0.19072	0.118047	0.0492458	FALSE
SERPINF1	4		0.189324		0.401921		0	0.0824651	2.97349	0.97	1		0.29295		1		0.259143		0.524299	0.20828	0.0643521	0.752234	FALSE
SF3B2	23		0.213662		0.268069		1		1.20552		1		0.0692724		1		0.110228		0.686378	0.196661	0.0751395	0.738919	FALSE
SF3B6	24		1		0.351482		0.00200403	0.152516	1.60201	0.94	0	0	1.89383	1	0.152901	0.916718	0.361938	0.55	0.720022	0.273876	0.00587425	1.65249	FALSE
SFT2D1	3		1		0.144021		1		0.551122		1		0.49247		1		0.267788		0.47703	0.358978	0.153332	0.573802	FALSE
SFTPA1	2		1		0.0457475		0.625836		1.15637		0.580118		0.510415		1		0.0945865		0.11048	0.042008	0.025446	0.308481	FALSE
SFTPB	7		0.594235		0.130065		0	0	2.38549	1	1		0.819153		1		0.174852		0.317591	0.119236	0.0566216	0.520369	FALSE
SFTPC	18		0.433224		0.141715		0	0	2.62176	1	0	0	1.11918	1	5.02495e-07	0	0.277205	1	0.328401	0.0781949	0.0431997	0.733067	FALSE
SGK1	2		1		0.334922		1		0.295008		1		0.0198178		1		0.0233527		0.574852	0.160814	0.130327	0.595223	FALSE
SH3BGRL3	2		1		0.0839221		1		0.0113437		1		0.0102938		1		0.0589651		0.812887	0.113074	0.0721553	0.160074	FALSE
SH3D19	3		0.954505		0.136179		1		1.12687		0.369492		0.727258		1		0.128307		0.32457	0.207553	0.128215	1.10347	FALSE
SH3GLB1	5		1		0.294484		1		0.0731871		1		0.301035		1		0.066923		0.378045	0.21526	0.146083	0.980299	FALSE
SH3YL1	2		0.178073		0.138279		1		1.21676		0.639094		0.140217		1		0.429014		0.51061	0.223506	0.101295	1.53727	FALSE
SHARPIN	4		0.257063		0.971998		0.0403076	0.304277	0.989862	0.87	1		0.206526		1		1.92795e-16		0.886912	0.113088	4.27645e-32	2.13485	FALSE
SKAP1	8		0.298146		0.433486		1.9063e-08	0.363692	2.56664	0.84	1		0.610445		1		0.610238		0.589662	0.183416	0.101463	2.22576	FALSE
SLAMF8	2		1		0.251869		1		1.41442		1		0.223779		1		0.021002		0.77914	0.185585	0.0352754	1.23866	FALSE
SLC25A37	2		1		0.0989725		1		0.0610055		1		0.199797		1		0.0940003		0.770416	0.182645	0.046939	1.34207	FALSE
SLC26A3	2		1		0.278014		0.99815		0.263243		1		0.136116		1		0.0229412		0.601855	0.358231	0.035927	0.0701098	FALSE
SLC35B1	3		1		0.135279		1		0.139643		1		0.0157322		1		0.0483547		0.653114	0.240385	0.106501	0.0889517	FALSE
SLC4A7	6		1		0.160731		1.56095e-05	0	1.28314	1	0.948825		0.719493		0.401128		0.370085		0.30404	0.271322	0.115081	0.863863	FALSE
SLPI	36		1		0.0971032		0	0	7.60293	1	0	0	1.87707	1	1		0.175651		0.812667	0.106569	0.0425295	0.657032	FALSE
SMAP1	9		1		0.223055		1		1.64189		1		0.102279		1		0.0679353		0.570841	0.217234	0.135916	3.25358	FALSE
SMARCC1	3		0.289642		0.25089		1		1.18495		0.425086		1.02055		0.840113		0.319207		0.57746	0.249848	0.0707961	2.46157	FALSE
SMC1A	2		0.476216		0.296479		5.60624e-08	0.02933	2.13856	0.99	1		0.301568		6.59418e-06	0	0.812101	1	0.622406	0.21804	0.0832311	1.20108	FALSE
SMC2	4		1		0.319884		1		0.27201		1		0.0509608		1		0.167497		0.570273	0.336892	0.092835	4.0304	FALSE
SMC3	5		1		0.179298		1		0.0107695		1		0.167623		1		0.181152		0.550399	0.31691	0.0988096	1.69625	FALSE
SMC4	2		1		0.0536691		1		1.63076		1		0.148491		1		0.0250276		0.603127	0.3144	0.0419914	3.2732	FALSE
SMIM1	2		0.518099		0.166447		1		1.68465		1		0.0882055		1		0.00609854		0.903012	0.0941458	0.00284192	0.531754	FALSE
SMOC2	2		0.185078		0.237176		0.0408042	0.106968	1.3701	0.96	1.34742e-06	0.302216	0.792571	0.87	1		0.0965155		0.574354	0.134748	0.0620739	0.192759	FALSE
SMTN	2		0.842028		0.206223		1		0.200746		1		0.374531		1		0.0678983		0.638484	0.26839	0.0599312	0.584387	FALSE
SNF8	18		1		0.377631		1		0.676781		1		0.00288462		1		0.135821		0.584955	0.265663	0.0744632	1.34385	FALSE
SNHG12	14		1		0.338101		1		0.200277		1		0.915025		1		0.878462		0.544187	0.169347	0.143833	4.93068	FALSE
SNHG7	3		1		0.155661		1		0.0589878		1		0.000128578		1		0.0804215		0.624838	0.268458	0.106704	0.153741	FALSE
SNRPA1	4		0.306181		0.271476		0.908243		1.48748		0.202526		0.360043		1		0.0315567		0.989079	0.0102844	0.00063622	1.85463	FALSE
SNRPB2	10		0.766451		0.2112		7.4173e-08	0.304277	1.94605	0.87	0.446648		0.254665		1		6.55338e-16		0.961771	0.0382292	1.6423e-31	0.543402	FALSE
SNRPD1	24		1		0.201585		1		0.195274		1		0.194665		0.113718	0.806581	0.150908	0.62	0.58368	0.380881	0.0354395	4.86277	FALSE
SNRPD3	19		1		0.432494		1		0.0304715		0.213713		0.428954		1		0.208235		0.862417	0.12602	0.00938278	1.07611	FALSE
SNX10	6		0.737173		0.131935		1		0.429239		1		1.32098		1		0.0542428		0.643672	0.302334	0.0233327	2.04438	FALSE
SNX2	7		1		0.202005		1		0.00573508		1		0.162567		1		0.0372602		0.509982	0.323871	0.150478	8.52056	FALSE
SNX9	4		1		0.268519		1		0.0508235		1		0.0851388		1		0.230777		0.895407	0.0777611	0.0268316	1.59412	FALSE
SON	15		1		0.0869668		1		1.94246		1		0.248013		1		0.355751		0.759615	0.0929145	0.0708715	1.83355	FALSE
SP110	5		1		0.235463		1		1.11598		1		0.551778		1		0.24612		0.295896	0.276447	0.13778	2.78312	FALSE
SPAG4	4		1		0.00656467		1		0.00568517		1		6.48774e-18		1		1.04397e-19		1	1.04987e-30	2.18989e-34	0	FALSE
SPATA6	4		0.971894		0.101138		1		2.58539		1		0.0153392		1		0.221837		0.708177	0.0866467	0.067628	1.16717	FALSE
SPCS2	15		1		0.073286		1		0.0122638		1		0.00905821		1		0.00147859		0.686168	0.281133	0.029175	1.10867	FALSE
SPIC	2		1		0.299958		1		0.317293		1		0.00242151		1		0.00030339		0.715193	0.227444	0.0573632	0	FALSE
SPRY1	9		1		0.0950233		5.72125e-08	0.0824651	2.43704	0.97	1		0.114069		1		0.0371179		0.968113	0.0244362	0.00745059	0.316305	FALSE
SRI	33		0.130721		0.375564		1		0.948863		0	0.0827523	1.8336	0.97	1		0.108855		0.632088	0.293336	0.0488894	0.81633	FALSE
SRM	5		1		0.015229		1		0.309349		1		1.19328		1		0.263889		0.518652	0.263969	0.142128	1.63375	FALSE
SRP14	12		1		0.207495		1		0.228233		1		0.0236675		1		3.47418e-17		0.719023	0.280977	2.28118e-32	3.21742	FALSE
SRPK1	3		1		0.195278		1		0.00346611		1		0.00844021		1		0.194078		0.76633	0.176482	0.0486237	2.47541	FALSE
SRPRA	3		1		0.189492		1		0.184253		1		0.0585579		1		9.21046e-17		0.973301	0.0266987	5.03658e-32	0.0938554	FALSE
SRRM2	53		0.789403		0.273678		0.000342962	0	1.17165	1	1		1.04949		1		0.541021		0.361004	0.285718	0.178239	1.31732	FALSE
SRSF10	4		1		0.181622		1		0.660193		0.860695		0.941511		0.0151722	0.0532794	0.481263	0.98	0.507724	0.315677	0.163952	2.16803	FALSE
SSBP1	21		1		0.0261258		1		0.029244		1		0.00583704		1		5.22528e-17		0.623475	0.376525	5.91096e-30	3.71436	FALSE
SSB	33		0.489167		0.2085		0.0037288	0.129322	2.05327	0.95	1		1.14206		1		0.801526		0.457141	0.25657	0.131144	1.81914	FALSE
SSR3	14		1		0.222813		1		1.75233		0.14408	0.690626	0.385784	0.67	1		0.133402		0.711192	0.23994	0.0295727	0.61566	FALSE
ST13	2		1		0.0417029		1		0.0340503		1		1.53649e-18		1		9.74745e-18		1	3.15574e-35	6.58332e-36	2.00174	FALSE
STAP2	8		1		0.166557		1		1.33442		0.580118		0.300019		1		0.0760655		0.539554	0.216619	0.148634	0.593351	FALSE
STAT3	2		0.949423		0.380112		1		1.12858		1		0.391487		1		0.0898578		0.729988	0.234812	0.0237039	5.92077	FALSE
STAU1	12		0.534508		0.243868		1		0.343907		1		1.25159		1		0.0568027		0.551939	0.220035	0.0794124	2.44316	FALSE
STEAP4	2		0.253541		0.326581		0.309668		0.301829		0.446648		0.176706		1		1.33238e-16		0.815572	0.184428	3.15154e-32	1.06071	FALSE
STIMATE-MUSTN1	3		1		0.178174		1		0.145479		1		1.12983e-16		1		1.37417e-17		1	6.72075e-31	4.93467e-35	5.79066	FALSE
STK4	2		0.392883		0.24397		1		1.69338		1		0.339638		1		0.0720286		0.634654	0.141572	0.0892935	2.8264	FALSE
STOML2	5		1		0.104316		1		0.0138297		1		0.115761		1		0.027933		0.957758	0.0411098	0.0011326	0.078792	FALSE
STX8	7		1		0.0804675		1		3.01503		1		0.298941		1		0.198245		0.902296	0.0445858	0.0420069	0.91829	FALSE
SUDS3	4		1		0.189378		1		1.7654		1		0.0217118		1		0.0530778		0.598339	0.224973	0.0800929	2.37905	FALSE
SUGT1	3		1		0.343918		1		0.028916		1		0.356901		0.984091		0.294995		0.450186	0.261141	0.110394	3.72809	FALSE
SUPT16H	2		1		0.110657		1		0.0903508		1		1.87328e-18		1		1.74878e-17		1	9.25204e-33	1.76184e-33	3.04921	FALSE
SURF1	19		0.842723		0.30746		1		1.40255		1		0.0157191		1		0.0122696		0.93944	0.0327815	0.0260817	3.1688	FALSE
SYNCRIP	13		0.595818		0.373576		0.0940816	0	1.94769	1	1		0.301658		1		0.226672		0.302776	0.244935	0.189889	2.24071	FALSE
TACC1	14		0.348452		0.238891		1.85106e-13	0.152516	1.68839	0.94	6.3447e-15	0	1.23251	1	1		0.467309		0.385395	0.159116	0.108296	1.62338	FALSE
TAF1D	9		1		0.309271		1		0.100133		1		0.312063		1		0.203886		0.544947	0.295053	0.0585129	4.29112	FALSE
TAGLN	7		0.994047		0.188751		1		1.14241		1		0.182188		1		0.134002		0.140649	0.0527251	0.0478463	0.732222	FALSE
TBCA	26		0.129113		0.342594		0.00276959	0.129322	4.19523	0.95	3.60244e-07	0.131487	1.56813	0.95	1		0.0111191		0.762013	0.222561	0.0122958	1.23415	FALSE
TBCB	7		1		0.0767599		1		1.57729		1		0.0396532		1		0.000743518		0.899968	0.0943594	0.00567271	0.586839	FALSE
TBRG1	2		1		0.0743113		1		0.0740986		1		0.00569128		1		4.15379e-17		0.99993	6.9896e-05	3.39738e-32	0	FALSE
TBXAS1	2		1		0.199358		0.00767764	0.498826	0.899833	0.23	1		0.17741		1		0.0444081		0.386745	0.183097	0.100018	0.824694	FALSE
TCEA3	5		1		0.241485		1		0.255369		1		1.49866		0.474898		0.40559		0.493566	0.38843	0.0384338	0.950033	FALSE
TCEAL4	5		0.693739		0.211921		1		1.87036		4.35201e-05	0.656385	0.564426	0.69	0.0135659	0.322098	0.354172	0.86	0.787724	0.11356	0.0776687	0.643494	FALSE
TCF25	13		0.574115		0.46545		1		0.615541		4.79283e-08	0	0.701753	1	1		0.185414		0.549742	0.277371	0.109421	2.38544	FALSE
TCF4	2		1		0.185106		1		0.0148069		1		0.00769991		1		0.0205016		0.532722	0.201728	0.152057	0.227663	FALSE
TCIRG1	4		1		0.0779427		1		0.0773793		1		0.0130061		1		3.56e-17		0.999646	0.000354153	7.62199e-32	4.77671	FALSE
TCP1	2		1		0.101015		1		0.0824773		1		0.0609219		1		0.0479234		0.624095	0.359024	0.0137294	2.60686	FALSE
TCTEX1D2	3		1		0.0504325		1		2.36213		1		0.0179695		1		0.0107268		0.944183	0.0230677	0.0147801	0.493597	FALSE
TECR	25		1		0.156406		1		0.0380597		1		0.151048		1		0.0158828		0.531537	0.454469	0.0139942	2.77556e-17	FALSE
TESC	4		1		0.301793		0	0	3.51845	1	1		0.448591		1		0.00601633		0.751812	0.115419	0.0482265	0.585158	FALSE
TFDP2	6		0.191417		0.265182		9.20006e-05	0.19659	2.33314	0.92	3.64425e-07	0.0576358	0.962603	0.98	1		0.445246		0.523556	0.154818	0.0926639	2.51699	FALSE
TFF1	2		1		0.0188909		1		0.014134		1		0.0498413		1		3.51708e-17		0.990106	0.00989421	1.48361e-32	1.92255	FALSE
TFF2	2		1		0.136711		1		3.83825		1		0.260659		1		0.00481099		0.890026	0.109263	0.000711209	0.334504	FALSE
TFPI	17		0.432781		0.124933		0.012745	0.796166	1.75013	0.39	0.0412964	0.302216	0.796975	0.87	1		0.427371		0.376411	0.237828	0.13914	1.44627	FALSE
TFRC	7		1		0.228089		0.0924942	0.02933	1.09617	0.99	0.00331715	0.91009	1.43561	0.55	0.719909		0.325815		0.476393	0.247424	0.0824809	1.01209	FALSE
TGFB1	4		0.172724		0.32339		3.26244e-09	0.612107	3.69359	0.71	1		0.46556		1		0.0202422		0.611652	0.377473	0.00660383	0.489747	FALSE
TGFBR2	8		0.188338		0.320499		0.482144		0.554536		1		0.536388		0.0610779	0.819872	0.272172	0.61	0.608422	0.174054	0.134173	2.02975	FALSE
TGOLN2	4		1		0.0557711		1		0.0482992		1		6.10847e-17		1		1.18601e-17		1	1.8168e-30	1.99088e-36	1.38778e-17	FALSE
THBS4	2		1		0.205799		1		0.036107		1		0.0639825		1		0.175799		0.957811	0.038244	0.00394468	0.48905	FALSE
THOC2	3		1		0.114652		0.99231		1.61185		0.00176173	0.0827523	0.918142	0.97	0.383558		0.240349		0.456069	0.217662	0.104888	2.41971	FALSE
THYN1	5		1		0.150843		0.246825		1.14945		1		0.43607		1		0.083603		0.753127	0.127042	0.0584239	2.52175	FALSE
TIMP1	54		1		0.036438		0	0	3.45368	1	0	0	1.37309	1	1		0.0338651		0.686655	0.0786195	0.055209	1.11045	FALSE
TIMP2	3		1		0.0715101		1		0.0739867		1		0.0167814		1		7.39369e-17		0.765172	0.234828	1.09649e-30	1.38778e-17	FALSE
TLN1	39		1		0.309838		1		0.110488		1.35687e-10	0.263883	1.02554	0.89	1		0.362179		0.790061	0.0747112	0.0394813	1.79825	FALSE
TM4SF1	7		0.982429		0.749838		1		0.471327		0.00101581	0.322143	0.320664	0.86	0.804689		0.228406		0.450927	0.293282	0.173079	1.43377	FALSE
TMA7	5		1		0.18289		1		0.0297989		1		0.157734		1		0.127293		0.824326	0.110956	0.064718	0.587806	FALSE
TMBIM6	73		0.626565		0.339281		1		0.315145		1		1.31728		1		0.347187		0.505464	0.11961	0.0645211	2.64196	FALSE
TMEM126A	2		1		0.259828		1		0.134983		1		0.191974		1		0.0344145		0.555907	0.398686	0.0454073	0.185556	FALSE
TMEM14B	22		1		0.311197		1		0.266945		1		0.356636		1		0.0203523		0.460007	0.124564	0.114178	2.01624	FALSE
TMEM14C	16		1		0.326646		1		2.11626		1		0.288903		1		0.0347002		0.725817	0.173687	0.0476249	4.38832	FALSE
TMEM176A	3		1		0.171792		0.019357	0.0824651	0.514763	0.97	1		0.22517		1		0.0530511		0.673537	0.223237	0.103226	0.73791	FALSE
TMEM208	3		0.810566		0.0952408		1		1.66315		1		0.0357192		1		0.0404254		0.938658	0.044142	0.0172	1.12883	FALSE
TMEM220	6		1		0.146928		1		0.966595		1		1.34345		1		0.0119406		0.52374	0.325571	0.0588176	1.04322	FALSE
TMEM238	10		1		0.00404385		1		0.00621881		1		0.0118466		1		0.00414057		0.564833	0.242217	0.147207	0	FALSE
TMEM50A	9		0.315775		0.2464		0.00073205	0.422938	1.16989	0.19	1		0.146756		0.00109742	0.856444	0.409707	0.41	0.59199	0.212211	0.0698197	0.73994	FALSE
TMEM54	3		1		0.220168		1		0.190671		1		6.1622e-17		1		5.29788e-18		1	4.74456e-32	1.0364e-62	0.595269	FALSE
TMEM59	21		1		0.153807		1		0.0348658		1		0.0963243		1		0.306069		0.945159	0.0384688	0.0145894	1.42635	FALSE
TMEM97	2		1		0.459386		1		0.481268		1		0.0363127		1		2.23687e-17		0.963105	0.036895	1.02603e-32	1.25306	FALSE
TMOD3	2		0.941328		0.13894		1		0.061225		1		0.0716796		1		0.123125		0.609404	0.253378	0.137218	0.640004	FALSE
TMX4	2		1		0.148514		1		0.148336		1		0.00842626		1		1.29516e-16		0.999906	9.36945e-05	4.55544e-32	13.6374	FALSE
TNFAIP6	3		1		0.0302955		1		0.00276638		1		0.0045532		1		0.00503875		0.771144	0.189756	0.0381913	0.527006	FALSE
TNFSF10	11		0.613165		0.232092		1		1.62355		1		0.0782842		1		0.0953689		0.615116	0.205814	0.0907602	2.16274	FALSE
TNFSF13B	3		1		0.378464		1		0.182905		1		0.076404		1		0.248542		0.677509	0.237919	0.0384782	1.64336	FALSE
TNNT1	2		1		0.0291111		1		0.0237691		1		6.82056e-18		1		1.26629e-18		1	5.55572e-32	1.23256e-64	6.93889e-18	FALSE
TNNT3	6		0.789403		0.264287		1		0.815251		1		1.07383		1		0.361739		0.48124	0.255769	0.168243	0.507977	FALSE
TOMM6	6		0.372653		0.152605		1		0.09331		0.405179		0.177948		1		0.0748292		0.402907	0.280425	0.231139	1.20311	FALSE
TOMM7	95		1		0.0196945		1		2.44378		1		0.0574015		1		0.011306		0.956382	0.0229979	0.00992932	0.460239	FALSE
TP53TG1	2		0.804165		0.18873		1		1.02506		1		0.42505		1		0.267736		0.60691	0.278282	0.100667	0.325565	FALSE
TPM3	57		1		0.90139		0.270364		1.32454		1		1.59301		0.831098		1.81568		0.530082	0.272255	0.0693416	1.63052	FALSE
TPRKB	8		1		0.289235		1		0.0917098		1		0.670002		1		0.0722896		0.854889	0.0669295	0.0408449	2.68422	FALSE
TRAM1	20		0.247361		0.487553		3.71534e-12	0.05642	2.89023	0.98	1		0.652393		0.000494381	0	0.783415	1	0.499887	0.274377	0.0973361	3.60261	FALSE
TRAPPC2L	18		1		0.296703		1		0.0750781		1		0.274656		1		0.235742		0.411284	0.335549	0.210567	2.96256	FALSE
TRAPPC6A	8		0.303151		0.177176		1		1.43304		1		0.240172		0.962577		0.630636		0.629542	0.170392	0.152299	1.06322	FALSE
TREM1	4		0.307498		0.330662		0.34133		0.698786		1		0.0929639		1		0.0113205		0.918454	0.0333815	0.0234052	0.518762	FALSE
TREM2	4		1		0.198959		1		0.0893553		1		0.0430127		1		0.158577		0.758276	0.14989	0.0774906	1.7296	FALSE
TRPT1	2		1		0.376817		1		0.376778		1		0.0137241		1		0.0407663		0.675776	0.172035	0.151832	3.20882	FALSE
TRPV2	2		1		0.149564		1		1.42639		1		0.0548443		1		0.0876608		0.54735	0.414056	0.0332957	2.09649	FALSE
TSPAN8	12		1		0.196173		0	0.498826	2.252	0.77	1		0.127889		0	0.0282403	1.13129	0.99	0.769815	0.176595	0.0534337	0.365914	FALSE
TXNL1	18		1		0.297803		1		0.0453641		1		0.00990117		1		0.209255		0.81833	0.0805757	0.0637003	3.02045	FALSE
TXNRD1	8		1		0.146064		1		0.048087		1		0.00992683		1		0.0141303		0.402086	0.315393	0.193305	1.05047	FALSE
TYROBP	34		0.724958		0.18321		0	0	2.42991	1	1		0.261088		0	0	1.59522	1	0.447385	0.260223	0.163369	1.31149	FALSE
TYW3	7		0.687186		0.366281		0.99988		1.13869		5.47873e-06	0.748203	0.592655	0.64	0.000507707	0.787896	0.626236	0.37	0.5779	0.273681	0.090562	5.50202	FALSE
U2SURP	2		1		0.210819		1		0.190511		1		0.02725		1		4.38494e-18		0.801766	0.198234	3.36052e-32	3.83178	FALSE
UAP1	3		1		0.237524		1		0.280073		1		0.0111414		1		0.00382549		0.413665	0.253012	0.199955	1.81537	FALSE
UBE2B	10		0.471552		0.531143		0.000171589	0.743916	2.31964	0.36	1		0.566287		0	0.954506	0.836842	0.47	0.732389	0.115061	0.0858205	2.05811	FALSE
UBE2D1	2		0.486089		0.167406		1		1.91602		1		0.395481		1		0.136992		0.734697	0.172751	0.0702321	1.81774	FALSE
UBE2H	6		1		0.123824		1		1.87865		1		0.0383501		1		0.00509235		0.683494	0.193528	0.105252	2.25085	FALSE
UBE2K	5		1		0.280426		1		0.036084		1		0.282238		1		0.149399		0.392434	0.306417	0.138321	1.94938	FALSE
UBE2Q2	2		0.939427		0.0678286		1		1.99436		1		0.0102032		1		0.283238		0.767259	0.0898459	0.0501528	0.947969	FALSE
UBN1	3		1		0.341144		1		0.118111		1		0.240372		1		0.158915		0.777276	0.172824	0.0499005	2.14003	FALSE
UBXN4	29		1		0.261086		1		0.0336689		1		0.110129		1		0.243126		0.653073	0.264095	0.0640349	2.39463	FALSE
UCHL3	14		1		0.147615		1		1.98064		1		0.0579658		1		0.0396593		0.766532	0.0834873	0.0562594	0.936766	FALSE
UFC1	2		0.675183		0.144112		1		1.67572		0.969681		0.0632061		1		0.0270433		0.519314	0.255968	0.128353	1.98787	FALSE
UFD1	33		1		0.279262		1		0.99539		1		1.28222		1		0.12996		0.573049	0.274107	0.10172	1.13591	FALSE
UPF3B	2		1		0.353527		1		0.0159278		1		0.382421		1		0.320793		0.752984	0.15883	0.0757963	4.54952	FALSE
UQCC2	22		1		0.0911376		7.30187e-11	0	1.8518	1	1		0.0143782		1		0.0266075		0.813318	0.0941194	0.0575067	2.66181	FALSE
UQCRC1	19		1		0.12125		1		0.0508729		1		0.0529857		1		0.194207		0.922323	0.0726458	0.00503116	0.847997	FALSE
UQCRH	72		1		0.0144734		1		0.00105821		1		0.0120206		1		0.000781606		0.96898	0.0187904	0.00813451	0.436933	FALSE
UROD	7		1		0.314605		1		0.325364		1		0.0571871		1		0.0242911		0.788525	0.169149	0.0376166	3.65885	FALSE
USP53	5		0.23125		0.376773		0.0163956	0.325108	1.14024	0.86	0.245204		0.62175		0.121426	0.146766	0.485803	0.94	0.336691	0.160073	0.136674	0.330013	FALSE
USP7	5		1		0.234025		1		0.108724		1		0.189315		1		0.228199		0.859008	0.0845529	0.0537315	4.18908	FALSE
UTRN	7		0.326095		0.551812		1		0.308904		0.682644		0.643279		1		0.333967		0.443003	0.100632	0.091645	3.54498	FALSE
VCAN	5		1		0.161477		9.11218e-05	0	1.94161	1	1		1.11889		4.29555e-07	0.0532794	0.503202	0.98	0.494054	0.2049	0.103343	2.10218	FALSE
VCL	2		1		0.0995037		1		0.0908232		1		0.00140258		1		1.04356e-17		0.938305	0.0616953	1.40168e-33	0.736251	FALSE
VPS28	14		1		0.119646		1		1.69056		1		0.278813		1		0.00386504		0.656993	0.25764	0.0486907	2.07183	FALSE
VPS29	8		0.445951		0.547421		1		0.165945		0.12878	0.177859	0.571481	0.93	1		0.0630129		0.584152	0.338838	0.0464299	2.54524	FALSE
VPS36	2		1		0.28845		1		0.946062		1		1.14438		1		0.0123149		0.47577	0.228513	0.0778025	1.31606	FALSE
VRK1	2		0.248252		0.656611		0.000325149	0.459667	1.99454	0.79	1		0.401777		0.0178348	0	0.397	1	0.775669	0.133627	0.0590695	2.20419	FALSE
WASF2	9		1		0.0292063		1		0.00544911		1		0.0260988		1		3.64087e-17		0.983867	0.0161331	6.11249e-31	6.93889e-18	FALSE
WASHC3	9		0.556769		0.397473		0	0.02933	2.87599	0.99	0	0.200444	1.10937	0.92	1		0.0683412		0.776865	0.166056	0.0255648	2.1002	FALSE
WBP4	7		0.803718		0.231504		2.51312e-07	0	2.33563	1	5.47552e-05	0.507237	0.765636	0.77	0.00117588	0.688105	0.367454	0.68	0.675921	0.203005	0.0630555	1.1679	FALSE
WDR54	2		1		0.190117		1		0.124435		1		0.107816		1		6.67149e-17		0.569496	0.430504	2.17541e-31	0.836548	FALSE
WNK1	3		1		0.139291		1		0.731971		1		0.963364		1		0.318446		0.353499	0.277717	0.18912	1.13596	FALSE
XBP1	2		1		0.149487		1		0.0318326		1		0.132698		1		2.36935e-17		0.923548	0.0764518	1.36079e-33	0	FALSE
XG	2		0.828106		0.283821		1		0.351831		0.0587736	0.62133	0.937909	0.71	1		0.198414		0.435144	0.192448	0.156127	0	FALSE
YWHAZ	8		1		0.153556		0.480863		1.10324		1		0.098263		1		0.126472		0.907022	0.0888869	0.00409081	0.982634	FALSE
ZCCHC17	6		1		0.29649		1		0.0753293		1		0.376852		1		0.259739		0.550675	0.15407	0.125212	2.80057	FALSE
ZNF706	11		1		0.196621		1		0.0245799		1		0.154694		1		0.125393		0.893775	0.101854	0.00437074	2.15854	FALSE
ZRANB2	17		1		0.212101		0.000270466	0	2.15116	1	0	0	0.872624	1	1		0.427856		0.74333	0.132286	0.0544353	1.09512	FALSE
unknown_chr12_91200000	2		1		0.220159		1		0.171581		1		0.143039		1		5.26165e-18		0.796797	0.203203	4.91075e-33	0	FALSE
unknown_chr22_22900000	6		1		0.155271		1		0.264746		1		0.078781		1		0.0641309		0.435794	0.164008	0.132725	8.04214	FALSE
unknown_chr2_89100000	2		1		0.0247174		1		0.559737		1		0.25242		1		0.127218		0.227272	0.191649	0.154774	0	FALSE
unknown_chr4_70700000	3		1		0.0301033		1		0.0245792		1		5.24404e-18		1		1.45257e-18		1	3.37801e-32	3.54613e-63	6.93889e-18	FALSE
unknown_chr6_GL000251v2_alt_3900000	3		1		0.051024		1		0.0122221		1		0.0449462		1		5.68712e-17		0.813525	0.186475	7.58085e-31	1.38778e-17	FALSE
unknown_chr6_GL000255v2_alt_3800000	7		1		0.163032		1		0.133115		1		6.12198e-17		1		5.224e-18		1	1.99448e-31	1.06291e-63	1.79908	FALSE
unknown_chrUn_GL000219v1_100000	2		0.88874		0.192906		4.83062e-10	0.344272	2.20592	0.85	1		0.27877		1		0.0822306		0.628832	0.211477	0.0772372	1.61032	FALSE

## Sheet: table4B
geneR1A_uniq	num_onts	sub_col	chi2_pval_adj_scZ	perm_pval_adj_scZ	max_abs_median_scZ	perm_cdf_scZ	chi2_pval_adj_svd_z0	perm_pval_adj_svd_z0	max_abs_median_svd_z0	perm_cdf_svd_z0	chi2_pval_adj_svd_z1	perm_pval_adj_svd_z1	max_abs_median_svd_z1	perm_cdf_svd_z1	chi2_pval_adj_svd_z2	perm_pval_adj_svd_z2	max_abs_median_svd_z2	perm_cdf_svd_z2	f0	f1	f2	gene_max_diff	sig
NUP214	4		0.000688393	0	0.367528	1	0	0	2.78838	1	0	0	1.1661	1	1		0.140817		0.861471	0.102224	0.029832	1.50711	FALSE
RPL11	61		0	0	0.0827074	1	0	0	4.20382	1	0	0	1.63977	1	1		0.0836022		0.689154	0.260046	0.0264883	0.263262	FALSE
RPL10	63		0	0	0.460314	1	0	0	2.09569	1	0.186118		0.235682		0	0	0.325864	1	0.750315	0.124694	0.108038	1.78022	FALSE
TPM1	7		0	0	1.76866	1	0	0	4.14447	1	0	0	2.25876	1	0	0	1.28719	1	0.463818	0.285775	0.0864903	1.47322	TRUE
REX1BD	14		2.14804e-09	0	0.308316	1	1		1.73057		1		0.00244918		1		0.0273047		0.797029	0.169396	0.0179104	0.97216	FALSE
RETN	4		9.34911e-08	0	0.264563	1	1		1.56908		1		0.14309		1		0.135553		0.842443	0.0790994	0.0739764	0.172252	FALSE
REEP5	4		0.000984817	0	0.0994519	1	6.93965e-11	0	6.30329	1	0	0	0.985813	1	0.018417	0.0688462	0.149592	0.97	0.908579	0.0626435	0.0206718	0.342011	FALSE
RBX1	30		6.82094e-11	0	0.197139	1	0	0	2.42208	1	0	0	0.362638	1	0	0	1.0355	1	0.758603	0.105189	0.089686	0.720666	FALSE
RBM39	7		1.82918e-10	0	0.37045	1	0	0	1.93576	1	0.00123342	0	1.10907	1	1		0.344072		0.4564	0.220551	0.0735304	0.655374	FALSE
RASGRP2	3		0.000464529	0	0.467215	1	0.013415	0.727451	2.06406	0.35	0.0157235	0.176502	0.596187	0.08	1		0.19694		0.756748	0.140514	0.0553329	1.59069	FALSE
RARRES2	11		7.71261e-12	0	0.40279	1	1		2.10576		1		0.197047		1		0.188521		0.91707	0.03536	0.0281984	0.947208	FALSE
RARRES1	3		0.0480008	0	0.445376	1	0.255157		2.52931		1		0.118768		1		0.032609		0.755706	0.164948	0.0516379	0.456087	FALSE
RACK1	59		0	0	0.41241	1	0	0	3.39565	1	0.002672	0	0.272602	1	0	0	0.592001	1	0.713485	0.126481	0.0561565	0.783751	FALSE
TPM2	17		0	0	1.15898	1	0	0	2.3734	1	0	0	3.71055	1	0	0	0.88429	1	0.460274	0.206085	0.0321236	1.53526	TRUE
PTPRE	3		0.00150205	0	0.523304	1	1.00426e-11	0	1.71185	1	0.155545	0	0.210777	1	0	0	1.47312	1	0.426022	0.174998	0.169852	0.534595	TRUE
PTPN6	9		0	0	0.326603	1	3.20947e-14	0	2.11644	1	0	0.0244776	0.903979	0.99	1		0.212867		0.722281	0.214393	0.0525736	0.640183	FALSE
RPL12	61		0	0	0.208522	1	0	0	5.43843	1	0	0	1.80912	1	0	0	0.2815	1	0.864459	0.101201	0.0149746	0.1953	FALSE
PTMA	55		0	0	0.320228	1	0	0	2.4986	1	0	0	0.598703	1	1		0.203262		0.900605	0.0548951	0.0284876	0.87662	FALSE
RPL13A	53		0	0	0.247714	1	0	0	6.97968	1	0	0	1.6136	1	1		0.0199059		0.795938	0.169235	0.00676286	1.47521	FALSE
RPL14	35		0	0	0.153031	1	0	0	1.31632	1	0	0	2.71695	1	0.813961		0.739565		0.444758	0.386012	0.0892542	0.669319	FALSE
RPL31	28		0	0	0.663489	1	0	0	1.68933	1	0.00292917	0	0.346108	1	4.16208e-11	0	0.296183	1	0.901326	0.0755798	0.0230941	0.778262	TRUE
RPL30	62		0	0	0.0681132	1	0	0	3.84538	1	0	0	0.871122	1	0	0	0.95769	1	0.668563	0.106546	0.0761932	0.117917	FALSE
RPL29	8		2.14656e-09	0	3.22811	1	8.14404e-15	0	4.52234	1	0.839987		0.248498		1		0.116493		0.566829	0.153001	0.0703849	1.63192	TRUE
RPL28	60		1.13644e-07	0	0.0771968	1	0	0	2.01164	1	1		0.719538		1		0.0185281		0.573073	0.345998	0.0196223	0.331863	FALSE
RPL27	50		0	0	0.28866	1	0	0	2.95199	1	1.10228e-07	0	0.398763	1	0	0	1.22343	1	0.593403	0.335389	0.0604896	0.532673	FALSE
RPL27A	51		0	0	0.412222	1	0	0	5.41969	1	0	0	0.423765	1	1		0.0135604		0.977963	0.0152932	0.00418354	1.73132	FALSE
RPL24	60		0	0	0.332824	1	1		2.12405		1		0.158377		1		0.104342		0.956412	0.021378	0.00615904	0.49949	FALSE
RPL23	48		7.1661e-12	0	0.0596941	1	0	0	2.18584	1	1		0.0303194		0	0	0.379816	1	0.940477	0.030017	0.0180516	0.0601648	FALSE
RPL23A	56		0	0	0.288419	1	4.95419e-14	0	1.05121	1	0	0	2.06066	1	1		0.0377074		0.500189	0.425696	0.0675443	0.554597	FALSE
TNNT3	3		0.0333867	0	0.281142	1	1		1.47723		0.817706		0.408006		3.93945e-11	0	0.30548	1	0.651602	0.167083	0.0516733	0.517087	FALSE
RPL21	51		0	0	0.0622696	1	0	0	3.7371	1	1.92059e-09	0	0.206911	1	1		0.0539091		0.748516	0.14797	0.0706947	0.286897	FALSE
RPL19	63		0	0	0.248118	1	1		0.105202		1		0.161455		1		0.0146551		0.309073	0.164891	0.134371	0.596232	FALSE
RPL18	62		0	0	0.121826	1	0	0	3.31649	1	7.00735e-10	0	0.468103	1	0	0	1.37109	1	0.698802	0.101812	0.0850321	0.273383	FALSE
RPL18A	61		0	0	0.290836	1	0	0	2.6308	1	3.52497e-11	0	0.203323	1	0	0	0.211653	1	0.570975	0.206104	0.181168	0.457098	FALSE
RPL17	60		0	0	0.116285	1	1		0.637758		0.0217903	0	2.48424	1	8.94363e-09	0	0.261607	1	0.755768	0.164666	0.0325021	0.579961	FALSE
RPL13	62		0	0	0.230924	1	0	0	4.41642	1	0	0	0.835623	1	0	0	2.76027	1	0.491271	0.236355	0.15257	0.398603	FALSE
RPL32	61		0	0	0.336302	1	0	0	0.617891	1	0	0	2.09004	1	1		0.0411197		0.494513	0.423651	0.0376674	0.767873	FALSE
TPM3	6		0	0	0.803026	1	0	0	3.80047	1	0	0	3.19187	1	1		1.08465		0.518444	0.267998	0.11373	1.36645	TRUE
PSME2	33		0	0	0.3139	1	1.26657e-06	0	2.57353	1	1		0.124105		0	0	0.346232	1	0.924694	0.0277753	0.0194235	0.381856	FALSE
NUCKS1	25		0	0	0.330103	1	0.051126	0.0253386	2.82744	0.99	1.71396e-07	0	0.401449	1	0	0.155652	0.691463	0.93	0.699692	0.188602	0.0811835	0.866782	FALSE
NUCB2	11		0.00453759	0	0.260068	1	1		1.12582		1.42461e-08	0.176502	1.17284	0.92	6.0515e-12	0	0.992433	1	0.447065	0.240806	0.185269	0.833183	FALSE
NOP53	43		0	0	0.205635	1	0	0	2.47352	1	0	0	0.646276	1	0	0	1.12557	1	0.705437	0.0995958	0.0840678	1.62993	FALSE
NME2	36		0	0	0.428857	1	0	0	2.15966	1	1		0.0641866		0.591401		0.355241		0.935912	0.0384092	0.0115165	1.25708	FALSE
NFKBIA	16		0	0	0.364304	1	1		0.691604		1		1.19882		0.0224085	0.0237086	0.116752	0.99	0.556027	0.323119	0.0894796	3.6987	FALSE
TPT1	63		0	0	0.384372	1	0	0	7.04001	1	0	0	1.72308	1	0	0	0.747265	1	0.68431	0.111911	0.0697988	0.701186	FALSE
NDUFV2	28		0	0	0.174103	1	0	0	2.24936	1	0	0	0.765646	1	1		0.0776619		0.910533	0.0595057	0.0227886	0.544117	FALSE
NDUFS8	8		0.00117721	0	0.288295	1	1		1.43325		1		0.402259		1		0.0218735		0.53625	0.416934	0.0404073	0.91438	FALSE
TXNDC17	14		0	0	0.41348	1	0	0	1.81216	1	2.67409e-11	0	0.332378	1	1		0.0938772		0.589618	0.31483	0.0414621	0.69684	FALSE
NDUFC1	20		0	0	0.777878	1	0	0	2.34094	1	1		0.227992		1		0.100443		0.846438	0.0676949	0.0376637	1.34333	TRUE
NDUFB9	8		2.88324e-05	0	0.250809	1	1		1.64573		1		0.150329		1		0.0185397		0.655911	0.271904	0.0656761	0.601608	FALSE
NDUFB8	23		0	0	0.427354	1	0	0	1.75764	1	1		0.145119		1		0.0319544		0.59336	0.227901	0.0916538	1.59268	FALSE
NDUFB7	18		0	0	0.421181	1	0	0	1.54602	1	0.0216461	0	0.130337	1	0	0	0.338948	1	0.847478	0.105993	0.0465289	0.58689	FALSE
TMBIM6	19		0.100357	0	0.143068	1	1		0.118841		1		0.0133042		1		0.0462634		0.253618	0.165206	0.10178	1.28844	FALSE
NDUFB1	13		2.31368e-08	0	0.637527	1	1		2.00146		1		0.073339		1		0.0606744		0.941693	0.0297022	0.0126361	1.17952	TRUE
unknown_chr6_GL000256v2_alt_4000000	17		2.40042e-07	0	0.311661	1	0	0	4.4734	1	0	0	0.996295	1	1		0.10782		0.481506	0.25591	0.0873099	0.427612	FALSE
PTGDS	10		0.0550123	0	0.305632	1	0	0	3.18448	1	0	0	1.41674	1	1		0.0342794		0.902536	0.0832095	0.00732399	0.682256	FALSE
OAZ1	36		0	0	0.272242	1	1		1.7386		1		0.165219		1		0.00208125		0.613314	0.18284	0.0606053	0.940452	FALSE
PABPN1	17		0	0	0.446754	1	0	0	2.10084	1	0	0	0.95048	1	5.7422e-05	0	0.17961	1	0.922435	0.0650399	0.0108307	0.717528	FALSE
PSMB4	11		6.22297e-08	0	0.508575	1	0.344733		1.88182		1.37859e-14	0.911111	0.92204	0.55	1		0.0220246		0.835687	0.160907	0.00310247	1.06938	TRUE
PSMB1	13		8.53837e-05	0	0.240217	1	0	0	1.93246	1	1		0.10454		0.476972		0.20098		0.92964	0.063376	0.00698371	0.54242	FALSE
PSMA5	5		5.20562e-11	0	0.271565	1	0.00614431	0	2.00627	1	0	0	0.629738	1	0.0103869	0	0.261948	1	0.807884	0.0925331	0.0510711	1.52791	FALSE
PSAP	6		0	0	1.10508	1	0	0	1.74036	1	0	0	0.593224	1	0	0	1.21492	1	0.72158	0.145911	0.0719686	0.669998	TRUE
PRELID1	16		0	0	0.453285	1	1		1.39201		1		0.0647108		1		0.0116917		0.907048	0.0705427	0.0213856	0.398004	FALSE
PRDX5	28		0	0	0.68091	1	0	0	2.64654	1	0	0	1.14827	1	0	0	1.17672	1	0.590289	0.230079	0.128742	1.67431	TRUE
PRDX1	21		3.78068e-12	0	0.238741	1	1		1.87345		1		0.015082		1		0.00878734		0.898986	0.0565862	0.0379905	0.690391	FALSE
PPP1R14A	7		0.000607922	0	0.146578	1	1		2.24363		1		0.0360233		1		0.0196298		0.945452	0.0389144	0.0104579	0.855446	FALSE
PPP1R12A	8		0	0	0.668951	1	0	0	2.15359	1	0	0	1.6569	1	2.23905e-08	0	0.614032	1	0.419103	0.208054	0.128647	2.05069	TRUE
POLR2I	16		0.0112997	0	0.278746	1	0.0636697	0	1.65315	1	1		0.811602		0.396123		0.635412		0.707799	0.249742	0.0287941	1.12289	FALSE
PNRC1	6		0	0	0.788019	1	0	0	2.07849	1	0.478466		0.663584		1		0.332183		0.551898	0.147954	0.12475	1.15281	TRUE
PLIN2	6		0	0	0.661754	1	0	0	2.35246	1	0	0	1.12554	1	0.103295	0	0.277943	1	0.674913	0.165411	0.0832469	0.740662	TRUE
PLBD1	2		2.12246e-11	0	0.298	1	0	0	2.76871	1	1		0.0166165		1		0.0192916		0.800548	0.122438	0.0733311	1.25941	FALSE
PFDN5	49		0	0	0.320251	1	0	0	2.7121	1	0	0	3.06781	1	0	0	0.576669	1	0.539678	0.286697	0.0791206	1.40049	FALSE
PCM1	2		0.0173323	0	0.464011	1	0.0015918	0	1.4389	1	0.478466		0.354447		0.689433		0.515217		0.503019	0.263992	0.150939	3.69034	FALSE
PABPC1	33		5.87805e-16	0	0.257677	1	1		2.19897		0.0833815	0.0244776	0.30144	0.99	1		0.0224571		0.787918	0.050803	0.0403393	0.610303	FALSE
RPL34	59		0	0	0.390505	1	0	0	3.14227	1	1		1.41017		6.8499e-10	0	0.167476	1	0.943364	0.0441332	0.00527853	0.553064	FALSE
RPL35A	55		0	0	0.279279	1	0	0	3.21036	1	1		0.141403		0	0	0.15135	1	0.91021	0.0524802	0.0154756	0.446739	FALSE
RPL35	43		0	0	0.251294	1	1		0.179385		0	0	1.81351	1	1		0.0217389		0.577792	0.170444	0.094771	0.317252	FALSE
SNHG5	40		0	0	0.350573	1	0	0	1.88848	1	0	0	0.685847	1	1.97244e-08	0	0.541145	1	0.481152	0.177826	0.11088	1.82611	FALSE
SNHG12	4		0.0178505	0	0.546531	1	0.736008		1.70079		0.545897		0.787396		1		0.0967555		0.483101	0.265879	0.122337	1.36513	TRUE
SMIM25	4		0.000199076	0	0.293992	1	0	0	2.98546	1	0.0482109	0	0.169649	1	1		0.0174025		0.799402	0.176595	0.0132817	0.633903	FALSE
SLMO2-ATP5E	45		0	0	0.4511	1	1		1.4588		1		0.0406023		1		2.92016e-15		0.979099	0.0209009	5.91592e-30	0.988708	FALSE
SLIRP	11		0.00110023	0	0.347869	1	0	0	2.30117	1	1		0.0870575		1		0.208536		0.896301	0.0746168	0.0243892	0.471577	FALSE
SFTPC	3		0.0827356	0	0.234879	1	0	0	3.35068	1	0	0	0.922887	1	3.82021e-11	0	0.603846	1	0.49789	0.0817868	0.0738717	0.814013	FALSE
SFT2D1	2		9.73416e-05	0	0.545298	1	5.44096e-09	0	1.67995	1	1		0.0300259		1		0.204573		0.502485	0.219217	0.16964	1.18725	TRUE
TNFAIP2	4		2.29435e-06	0	0.564236	1	0.148077		0.480305		1		0.206195		1		0.305375		0.334464	0.239123	0.205019	0.388173	FALSE
SEPTIN7	18		8.68996e-09	0	0.448418	1	0	0	2.97166	1	7.65167e-13	0.0244776	0.828123	0.99	0	0	0.462748	1	0.725802	0.092972	0.0494543	1.24477	FALSE
SELENOH	22		9.11425e-09	0	0.281901	1	1		0.860394		1		1.02626		1		0.0681182		0.604882	0.331042	0.0425395	1.70062	FALSE
SEC61G	22		0	0	0.700402	1	0	0	2.5305	1	1		0.2269		0	0	0.639929	1	0.782427	0.176816	0.0311111	1.39938	TRUE
SEC11C	9		0.00303899	0	0.21415	1	0	0	1.90476	1	1.09288e-09	0	0.561198	1	0	0	0.556364	1	0.719806	0.116353	0.088799	1.01334	FALSE
SCGB3A1	4		4.14496e-07	0	0.184759	1	1		3.73409		0	0.0244776	2.52337	0.99	1		0.140696		0.647938	0.251398	0.0546496	1.16591	FALSE
SCGB1A1	4		7.32799e-10	0	0.197999	1	2.66801e-07	0.0956391	3.25724	0.96	0.821366		1.66665		1		1.06522		0.550236	0.18113	0.138288	0.950865	FALSE
SAT1	29		0	0	0.201819	1	1		1.37347		1		0.185047		1		0.0136486		0.814275	0.14882	0.0218041	0.870982	FALSE
SNHG6	31		0	0	0.407172	1	1.27905e-13	0	1.46527	1	0	0	0.666927	1	0	0	0.402714	1	0.574407	0.278053	0.112646	1.52659	FALSE
SAP18	8		0.0608232	0	0.207257	1	1		1.65667		1		0.0174451		1		0.00804052		0.964878	0.0289345	0.00618802	0.412158	FALSE
SNHG8	25		0	0	1.07143	1	1		1.76866		0	0	0.750656	1	1		0.120954		0.811637	0.159574	0.0153621	1.85123	TRUE
SNX6	8		1.74755e-08	0	0.466492	1	0	0	2.18436	1	0	0.0699526	0.518212	0.97	1.85484e-07	0	0.60444	1	0.73773	0.111928	0.074806	1.30785	FALSE
TAF10	15		0	0	0.449083	1	1.37291e-09	0.0253386	1.815	0.99	1		0.0133092		1		0.00921483		0.908663	0.0679182	0.0234188	0.41059	FALSE
SVIL	5		0	0	0.886168	1	1.86213e-10	0	2.62698	1	2.64595e-09	0	0.52017	1	5.08194e-11	0	0.987408	1	0.70378	0.11054	0.0965015	1.11185	TRUE
SURF1	4		5.43425e-05	0	0.253275	1	1		1.41466		1		0.00818466		1		0.00175709		0.969191	0.028967	0.0018424	0.599587	FALSE
STXBP2	7		9.98374e-07	0	0.438839	1	0	0	1.51792	1	1		0.37625		0	0	0.219681	1	0.672749	0.292874	0.0248816	0.572065	FALSE
STX8	4		0.0183964	0	0.245301	1	5.29615e-15	0	2.44204	1	9.2133e-08	0	0.901025	1	6.85756e-11	0.155652	0.608665	0.93	0.856027	0.0774582	0.0555142	0.362327	FALSE
TMEM219	11		0	0	0.744657	1	1		2.01734		1		0.0785635		1		0.0121024		0.945116	0.0318372	0.0152418	2.01966	TRUE
SSR4	45		0	0	0.41696	1	0	0	4.30525	1	0	0	1.42662	1	1		0.033258		0.874005	0.116262	0.00951864	0.831638	FALSE
SSB	7		0.0254565	0	0.217495	1	1		1.16262		1		0.00143385		1		0.058		0.823757	0.11229	0.0639522	0.30201	FALSE
SRSF5	21		2.83781e-11	0	0.352709	1	1		2.28509		1		0.106995		1		0.329474		0.894407	0.0612069	0.0303918	0.868503	FALSE
TMEM258	24		5.79673e-10	0	0.247804	1	0.00537521	0	1.75809	1	1		0.122399		1		0.105742		0.650915	0.27585	0.037777	0.913535	FALSE
SRRM2	21		0.000187729	0	0.345854	1	0	0	1.23623	1	1		0.249545		1.55815e-05	0	0.279925	1	0.59556	0.315252	0.0379674	0.805726	FALSE
SPATS2L	5		4.79061e-13	0	0.325918	1	4.53812e-07	0.0956391	2.8578	0.96	1		0.0401265		0.988537		0.171764		0.875921	0.0625397	0.0229533	1.02827	FALSE
TMSB4X	14		0	0	1.19221	1	0	0	2.02675	1	1.82104e-10	0	0.264164	1	1.06474e-06	0	0.572986	1	0.609995	0.17161	0.0684486	1.39106	TRUE
SON	10		0.062892	0	0.292568	1	1		0.867912		1		0.807688		1		0.545695		0.430774	0.337768	0.148557	0.735819	FALSE
SOD1	27		0	0	0.467775	1	0	0	2.55952	1	0	0	1.07976	1	0	0	1.13254	1	0.641755	0.234675	0.0780402	0.808074	FALSE
SNRPB	5		0.000931016	0	0.479035	1	0.00085583	0	0.448873	1	1		0.0197093		1		0.0458455		0.696563	0.175859	0.127579	0.817967	FALSE
S100A9	8		0	0	1.59387	1	0	0	5.22794	1	0	0	9.41007	1	0	0	0.687721	1	0.473047	0.381736	0.0516145	2.57881	TRUE
S100A8	11		0	0	0.664183	1	0	0	3.74417	1	0	0	1.50512	1	0	0	0.363313	1	0.834414	0.127705	0.0269047	1.03135	TRUE
S100A6	51		0	0	0.272102	1	0	0	0.638448	1	0	0	2.40631	1	1		0.110983		0.68546	0.29998	0.00464696	1.27541	FALSE
RPS13	60		0	0	0.3876	1	1		2.71987		7.71628e-06	0	0.398027	1	1		0.0110019		0.923172	0.0200791	0.0164432	0.694629	FALSE
RPS12	62		0	0	0.361672	1	0	0	8.93301	1	0	0	2.79582	1	0	0	0.831246	1	0.857353	0.106334	0.0158323	1.28623	FALSE
RPS11	57		0	0	0.235265	1	0	0	3.06094	1	0	0	0.290143	1	0	0	0.839202	1	0.603568	0.349971	0.033584	0.416629	FALSE
RPS10	34		0	0	0.443425	1	1		0.359156		1		1.39039		1		0.0111647		0.564751	0.377375	0.0307556	0.456586	FALSE
RPN2	12		0.0246018	0	0.27217	1	1		2.64143		0	0	0.681445	1	0	0.732273	0.323602	0.64	0.853514	0.0870875	0.0394923	1.53404	FALSE
RPLP2	60		0	0	0.22405	1	0	0	5.54383	1	0	0	1.31968	1	2.75368e-06	0	0.072567	1	0.920844	0.0695867	0.0051114	0.527662	FALSE
RPLP1	64		0	0	0.169337	1	0	0	2.82408	1	1		0.032402		2.56592e-07	0	0.174145	1	0.967718	0.0102253	0.00776998	0.197718	FALSE
RPL8	61		0	0	0.403959	1	1		4.66109		1		0.40991		1		1.70492		0.365597	0.274467	0.112935	0.491222	FALSE
RPL7A	62		0	0	0.11381	1	1		0.16342		0	0	2.03992	1	1		0.0305332		0.762794	0.14386	0.0527862	0.456105	FALSE
RPL6	53		0	0	0.25541	1	1		1.95473		1		0.0202378		1		0.00290797		0.686519	0.140194	0.0663045	0.464504	FALSE
RPL3	59		0	0	0.177343	1	1		0.694753		1		1.09145		1		0.993652		0.498483	0.233882	0.17174	0.332625	FALSE
RPL38	48		0	0	0.239499	1	0	0	1.49997	1	0	0	1.00409	1	0	0	0.1219	1	0.560242	0.409802	0.0170204	0.395849	FALSE
RPL37	58		0	0	0.421828	1	1		1.32047		1		1.71895		1		0.00102952		0.620501	0.36964	0.00429235	0.717685	FALSE
RPL36	53		0	0	0.445919	1	3.34001e-11	0	2.30811	1	1		0.471635		1		0.0989631		0.931843	0.0361211	0.0246195	0.772707	FALSE
RPL36A-HNRNPH2	40		0	0	0.303991	1	1		0.136829		1		1.5718		1		0.0934905		0.612888	0.219449	0.123627	0.995594	FALSE
RPS14	61		0	0	0.387818	1	0	0	8.78282	1	0	0	2.49915	1	0.762697		0.0753851		0.755777	0.208914	0.0101414	0.292796	FALSE
RPS15A	62		0	0	0.214566	1	0	0	2.89569	1	0	0	0.949412	1	0.131723	0	0.0698505	1	0.88074	0.094436	0.012188	0.499978	FALSE
RPS16	61		0	0	0.339361	1	0	0	2.78927	1	0	0	1.29603	1	1		0.0396925		0.944699	0.0457242	0.00370841	0.775553	FALSE
RPS19	59		0	0	0.518706	1	0	0	4.00945	1	0	0	1.43843	1	0	0	0.732483	1	0.725614	0.0758594	0.0652612	0.936125	TRUE
S100A13	11		1.24567e-07	0	0.220781	1	0	0	4.10158	1	1		0.0405017		1		0.0642765		0.663653	0.290635	0.0267553	0.704175	FALSE
RPSA	52		0	0	0.12005	1	0	0	6.49085	1	0	0	1.29519	1	1.43472e-11	0	0.958483	1	0.693931	0.150414	0.126343	0.505345	FALSE
RPS8	60		0	0	0.119454	1	0	0	3.06499	1	0	0	0.449144	1	0	0	0.732223	1	0.793874	0.118504	0.0523917	0.317597	FALSE
RPS7	48		0	0	0.340167	1	0	0	6.72672	1	0	0	1.51588	1	1		0.378816		0.878825	0.0970714	0.00642714	0.656804	FALSE
RPS6	59		0	0	0.275787	1	0	0	7.63665	1	0.0302015	0	1.09826	1	0	0	1.40761	1	0.666391	0.214487	0.0733074	0.398006	FALSE
RPS5	59		0	0	0.236566	1	0	0	2.63259	1	1		0.326605		1		0.271132		0.708096	0.230105	0.0313449	0.514767	FALSE
RPS4X	61		0	0	0.337943	1	1		2.10918		1		4.90768		1		1.00358		0.372215	0.320699	0.153276	0.680445	FALSE
TXNIP	29		1.16844e-15	0	0.359455	1	1		1.79897		1		0.357801		1		0.161567		0.565306	0.161555	0.0899914	1.03174	FALSE
RPS3	58		0	0	0.183763	1	0	0	6.78072	1	0	0	1.51475	1	1		0.490029		0.726174	0.0963574	0.0760893	0.817206	FALSE
RPS28	48		0	0	0.349118	1	0	0	2.75449	1	0	0	0.322298	1	1		0.00324905		0.993296	0.00623327	0.00047041	0.8426	FALSE
RPS27	61		0	0	0.277699	1	1		1.41267		0.4901		0.168352		1		0.00305198		0.890065	0.0977921	0.0102694	1.50973	FALSE
RPS27A	61		0	0	0.555541	1	0	0	3.05011	1	0	0	1.32703	1	1		0.00212399		0.895793	0.0962394	0.00279184	0.843269	TRUE
RPS24	47		0	0	1.85336	1	0	0	2.44586	1	0	0	2.16621	1	0	0	2.1315	1	0.408704	0.303565	0.126184	1.4707	TRUE
RPS23	59		0	0	0.0932335	1	0	0	6.31452	1	0	0	2.75593	1	0.0571388	0	0.134189	1	0.420731	0.318413	0.135176	0.393829	FALSE
RPS21	54		0	0	0.371293	1	0	0	2.48372	1	0	0	0.39238	1	0	0	0.138228	1	0.924644	0.0283278	0.0242548	0.682128	FALSE
RPS20	50		0	0	0.21021	1	0	0	3.54151	1	0.0576261	0	0.126857	1	0	0	0.214151	1	0.946857	0.0479914	0.0051514	0.575481	FALSE
RPS2	60		0	0	0.143602	1	0.05771	0	21.7819	1	0.628194		0.35815		0	0	1.66874	1	0.698887	0.151416	0.0604219	0.196048	FALSE
NDUFAB1	24		0	0	0.412526	1	0	0	1.4129	1	0	0	1.03599	1	0	0	0.347028	1	0.651538	0.303957	0.0355185	5.06416	FALSE
NDUFB2	31		0	0	0.267054	1	0	0	3.15429	1	1		0.065763		1		0.141405		0.900189	0.0775168	0.00867521	0.68632	FALSE
NDUFA2	8		0.0178505	0	0.363677	1	1		0.92445		1		0.0342248		1		2.8606e-17		0.840828	0.159172	9.04161e-33	0.865556	FALSE
CTSS	5		0.0958396	0	0.0859279	1	1		0.800484		1		1.39406		0	0	0.500542	1	0.715556	0.18018	0.0359606	0.394481	FALSE
CTSL	2		0.0233406	0	0.311086	1	1		0.0197042		1		0.210437		1		0.14534		0.364244	0.315343	0.185428	0	FALSE
WFDC2	7		0.0033326	0	0.176224	1	1		1.73086		1		0.247614		1		0.308783		0.67074	0.1825	0.09704	0.707523	FALSE
CSTA	4		0.000456036	0	0.244479	1	1		1.6128		1		0.055069		1		0.00616388		0.920828	0.0757252	0.00344718	0.0643229	FALSE
CRIP1	40		6.57472e-09	0	0.248086	1	0	0	2.88135	1	1.35933e-09	0.0244776	1.23073	0.99	1		0.0120953		0.915611	0.0662174	0.00747873	1.53157	FALSE
YBX1	27		4.93622e-08	0	0.359759	1	0	0	4.64778	1	1		0.382693		0	0	1.30033	1	0.715589	0.148063	0.104547	2.10654	FALSE
CPVL	9		0.00755898	0	0.235026	1	0	0	1.69309	1	0.000115219	0	0.339382	1	0.183433	0	0.132357	1	0.596921	0.284594	0.0520512	0.235937	FALSE
COX7A2	31		0	0	0.116984	1	0	0	2.41348	1	0	0	0.781685	1	0	0	0.129329	1	0.840995	0.112355	0.0248469	0.24304	FALSE
COX6C	33		0	0	0.271637	1	0	0	3.78667	1	0	0	1.11918	1	0	0	0.35511	1	0.818022	0.119316	0.0440983	0.856847	FALSE
COX5B	38		1.32031e-08	0	0.276356	1	0	0	1.17541	1	0	0	2.61858	1	0.00263475	0	0.104845	1	0.51079	0.401205	0.0527086	0.86873	FALSE
COX4I1	34		0	0	0.531899	1	0	0	3.22119	1	0	0	0.504369	1	0	0	0.124399	1	0.971229	0.017613	0.00473909	2.01646	TRUE
COPE	30		0	0	0.239882	1	0	0	2.06523	1	0	0	0.850821	1	0	0	0.450993	1	0.768427	0.171867	0.0285342	1.11809	FALSE
COMMD6	31		0	0	0.177773	1	0.00925759	0.0253386	1.1718	0.99	0	0	1.83892	1	1		0.0789069		0.586425	0.318663	0.0788169	0.918526	FALSE
CLU	20		1.39928e-05	0	0.243525	1	0	0	5.58413	1	0	0	0.556787	1	7.51144e-06	0	0.242091	1	0.893834	0.0310311	0.0243262	0.929056	FALSE
CLEC2B	18		0.0548718	0	0.27537	1	1		1.39192		1		0.190813		1		0.099894		0.457622	0.34947	0.0925022	0.713452	FALSE
CXCL14	6		0.0652711	0	0.0366325	1	1		2.64682		1		0.0258755		1		0.00526568		0.984688	0.0118635	0.00335657	0.0496022	FALSE
CKLF-CMTM1	11		0	0	0.490004	1	0	0	1.54034	1	6.58054e-05	0	0.787008	1	7.50694e-14	0	0.191639	1	0.611702	0.287765	0.0581276	1.51483	FALSE
CYBA	31		0	0	0.306165	1	0	0	3.92299	1	0	0	1.40023	1	1		0.179493		0.685028	0.197626	0.0528866	0.705079	FALSE
DBI	17		4.82205e-07	0	0.343654	1	1.71519e-05	0	4.42895	1	0.00440569	0	1.32067	1	1		0.0660262		0.71346	0.262983	0.018348	0.824431	FALSE
EIF1	55		0	0	0.236802	1	1		0.169557		1		1.37465		1		0.0320799		0.593826	0.271062	0.0378758	0.923355	FALSE
NDUFA4	36		0	0	0.338197	1	0	0	4.25023	1	0	0	1.53872	1	8.51743e-06	0	0.0449393	1	0.867101	0.127943	0.00385085	0.727002	FALSE
EEF1G	48		0	0	0.303622	1	1		0.171881		0.372747		1.73114		1		0.158639		0.352113	0.230072	0.170341	0.3454	FALSE
EEF1B2	51		0	0	0.240081	1	1		0.228727		0	0	1.56721	1	0	0	0.427328	1	0.847328	0.137071	0.00985503	2.18716	FALSE
EEA1	2		2.62568e-05	0	0.905357	1	0.541343		0.834056		0.0624518	0.504615	0.510911	0.76	0.087668	0.720115	0.517537	0.65	0.535324	0.190628	0.168578	2.00989	TRUE
EDF1	31		0	0	0.371593	1	1		2.0942		1		0.141609		1		0.0161239		0.948967	0.0416688	0.00764478	0.89289	FALSE
DRAP1	24		0	0	0.280781	1	0	0	2.18895	1	1		0.226682		0	0	0.911753	1	0.533572	0.376512	0.0748494	0.695252	FALSE
DPP7	16		0	0	0.35572	1	0	0	0.989121	1	0	0	1.90169	1	0	0	0.402532	1	0.611704	0.347146	0.0225456	3.08779	FALSE
DNMT1	4		1.24725e-05	0	0.405602	1	0.0477317	0.223158	1.70352	0.9	0.000575638	0	0.88226	1	1		0.0437509		0.568198	0.220449	0.0798509	2.04717	FALSE
DNAJC15	12		0.000756791	0	0.217483	1	1		2.26747		1		0.135812		0	0	0.540766	1	0.880339	0.0524657	0.0312986	0.770601	FALSE
DNAAF1	2		6.14848e-06	0	0.794281	1	2.46481e-06	0	0.577997	1	1		0.541306		1		0.131447		0.619325	0.335574	0.0451011	0.275227	FALSE
VPS28	7		0.00163647	0	0.311121	1	0	0	1.86525	1	1		0.11711		0.00011968	0	0.383002	1	0.935585	0.055715	0.00870039	0.643729	FALSE
DEK	16		0.000249851	0	0.347298	1	1.68714e-05	0.805325	3.26626	0.61	0.00145437	0.283009	1.07611	0.87	2.27105e-05	0.460585	0.693693	0.78	0.644161	0.194301	0.0993012	1.30021	FALSE
DECR1	4		5.87805e-16	0	1.0762	1	0	0	6.50597	1	4.56868e-07	0.404675	1.60282	0.19	1		0.397345		0.690967	0.148848	0.0814764	1.69044	TRUE
DCN	4		4.47444e-05	0	0.23615	1	7.90671e-09	0	1.17992	1	1.12323e-09	0	0.628552	1	1		0.264108		0.267822	0.223166	0.150885	0.852496	FALSE
DAD1	15		0.00300183	0	0.226907	1	0	0	2.80339	1	1		0.0809089		1		0.0505947		0.916827	0.0391437	0.0348811	0.365127	FALSE
EIF3G	37		0	0	0.397294	1	0	0	1.74568	1	0.0501283	0	0.0975402	1	0.000118818	0	0.108771	1	0.724082	0.154098	0.0884696	0.788014	FALSE
CIRBP	15		0.0231601	0	0.593554	1	0.0181059	0.0498824	1.60332	0.98	7.23135e-08	0.628085	0.962744	0.3	0.0285813	0.541163	0.490041	0.74	0.68044	0.207605	0.0726688	1.02962	TRUE
CHID1	5		0.000963624	0	0.420096	1	1		1.87339		1		0.0414748		1		0.0163116		0.829337	0.0928751	0.0299877	1.24556	FALSE
ATP5PD	30		0	0	0.390189	1	0	0	2.25951	1	0	0	0.684776	1	1		0.15321		0.771317	0.127853	0.0548516	0.874534	FALSE
ATP5MPL	12		5.87805e-16	0	0.304219	1	1		2.45961		1		0.251496		1		0.0010644		0.811893	0.130467	0.0396467	1.26656	FALSE
ATP5MG	32		0	0	0.528767	1	0	0	3.77585	1	0	0	0.522885	1	1		0.00291164		0.977385	0.0133105	0.00394826	0.889046	TRUE
ATP5MD	21		0.0290312	0	0.261233	1	1		1.54648		1		0.0426886		1		0.11132		0.729704	0.248291	0.0220049	0.482307	FALSE
ATP5F1C	27		0	0	3.28454	1	0	0	4.04321	1	0	0	0.984168	1	0	0	0.647318	1	0.868232	0.0842305	0.0332171	2.8058	TRUE
ARPC3	21		0	0	0.770381	1	0.00395138	0.631788	3.37527	0.7	0	0	0.408647	1	1		0.168324		0.836907	0.102539	0.0451517	1.02463	TRUE
ARPC2	37		3.36631e-11	0	0.395245	1	0	0	4.69108	1	0.000476915	0	2.64921	1	0	0	0.427383	1	0.646336	0.134898	0.0911388	1.18505	FALSE
ARL6IP1	18		0.000107849	0	0.250132	1	4.02085e-10	0	1.86331	1	0	0	0.790981	1	0.0512567	0	0.159712	1	0.659377	0.155757	0.0995759	0.473978	FALSE
ARID5B	21		6.19134e-10	0	0.493577	1	4.41488e-14	0	2.95591	1	0	0	0.950708	1	0	0	0.377534	1	0.811323	0.0932392	0.0437714	0.700258	FALSE
ZFAS1	33		0	0	0.279387	1	2.10779e-08	0	1.56733	1	0	0	0.791807	1	0.182193	0.296568	0.773351	0.86	0.599847	0.214618	0.0937035	0.737164	FALSE
AREG	12		0	0	0.660314	1	8.95393e-08	0.201549	2.29077	0.91	1		0.602756		0	0	0.567528	1	0.752163	0.137214	0.0740133	2.19831	TRUE
AKR1A1	16		0.00027664	0	0.356328	1	1		2.02328		1		0.501447		1		0.0651799		0.496622	0.45046	0.0308523	0.749408	FALSE
AKAP13	4		0.00105978	0	0.433528	1	8.95755e-08	0	1.81732	1	0.0349745	0.7585	0.403631	0.63	1		0.137842		0.564654	0.090031	0.0704629	0.577932	FALSE
unknown_chr17_29500000	3		8.92394e-11	0	0.684837	1	0.451255		0.243329		7.06759e-07	0	0.726125	1	2.37571e-05	0	0.559172	1	0.156765	0.151517	0.135844	1.56883	TRUE
ADIRF	18		0.0168537	0	0.406508	1	1		1.37138		0.0334047	0	0.277499	1	1		0.00921447		0.810781	0.178551	0.00787184	1.26874	FALSE
ATP5PO	34		0	0	0.27095	1	0	0	2.57474	1	0	0	0.493107	1	0	0	0.825485	1	0.685327	0.187553	0.0892623	0.509678	FALSE
CIR1	5		0	0	1.17847	1	0	0	2.41736	1	0	0	1.21208	1	0.000161115	0.0237086	0.31289	0.99	0.728152	0.192838	0.0459285	2.10934	TRUE
BAX	5		1.59687e-14	0	0.3268	1	1		1.88771		1		0.415198		1		0.0328471		0.775714	0.183249	0.0181508	0.76563	FALSE
BLVRB	11		2.40367e-10	0	0.318714	1	9.57714e-05	0	2.23547	1	1		0.249262		1		0.169313		0.76354	0.181338	0.0276793	0.456688	FALSE
YBX3	14		2.52474e-08	0	0.399134	1	4.96437e-16	0	2.23197	1	1.12353e-10	0	0.897942	1	5.40807e-12	0	0.665099	1	0.58397	0.19125	0.0883651	0.462217	FALSE
CHCHD2	27		0	0	0.421537	1	0	0.0253386	4.65384	0.99	0	0.947705	0.417567	0.47	1		0.0390411		0.985806	0.00836139	0.00467973	0.842639	FALSE
CD74	6		1.73795e-07	0	0.954588	1	1		1.92312		2.66906e-14	0	1.37031	1	1.09679e-09	0	0.749192	1	0.539566	0.0706503	0.0532524	1.39914	TRUE
CD63	51		0	0	0.321745	1	0	0	3.97891	1	0	0	0.933231	1	0	0	0.398404	1	0.736182	0.128778	0.0477722	0.503175	FALSE
CD55	8		1.55098e-07	0	0.330351	1	9.21278e-05	0.0253386	1.44735	0.99	1		0.296075		1		0.514957		0.435354	0.282051	0.12137	0.905026	FALSE
CD47	11		0	0	1.28272	1	1.6612e-12	0	1.70985	1	0	0	3.17429	1	0	0	0.488732	1	0.637818	0.283074	0.0365342	1.89425	TRUE
CD163	4		0	0	0.231163	1	0	0	3.19384	1	0	0	0.408597	1	0	0	0.46829	1	0.687176	0.158117	0.0770861	0.49274	FALSE
CAST	22		2.18481e-08	0	0.340583	1	0	0	3.21159	1	0	0	1.47326	1	0	0	0.8643	1	0.583054	0.0975243	0.0654302	1.10955	FALSE
CARS2	2		0.0206041	0	0.396692	1	1.57746e-12	0	2.1835	1	1		0.240663		0.00157835	0	0.343678	1	0.928515	0.0604879	0.0109969	1.16607	FALSE
CARD16	8		0	0	0.380937	1	0	0	1.78041	1	0	0	0.856983	1	1		0.155407		0.527216	0.246047	0.156024	0.903263	FALSE
CAPG	12		0.102031	0	0.167645	1	0	0	7.44328	1	0.323544		0.689757		0	0	1.29876	1	0.758811	0.0976492	0.0682207	2.51381	FALSE
CALM1	47		0	0	0.25894	1	0	0	3.65052	1	0	0	1.23848	1	0	0	0.703327	1	0.555517	0.21366	0.0670085	1.0112	FALSE
C4orf48	5		0.0744562	0	0.106823	1	1		1.43796		1		0.00593218		1		0.00506011		0.961314	0.0350956	0.00359018	0.237483	FALSE
C3	8		0	0	0.181769	1	0	0	2.93842	1	1		0.061478		0.00650652	0.296568	0.167699	0.86	0.497068	0.22528	0.168211	0.371697	FALSE
C12orf57	13		0.0237006	0	0.20601	1	1		0.0839594		0.241842		0.208491		1		0.173982		0.474306	0.297277	0.168542	5.25212	FALSE
BCL2A1	4		2.46006e-10	0	0.261946	1	3.32169e-11	0	0.262377	1	0.740823		0.109491		1		3.43588e-16		0.77862	0.22138	3.628e-31	1.8442	FALSE
EIF3M	17		6.349e-15	0	0.268852	1	0	0	2.7178	1	0	0	1.07946	1	1		0.110346		0.819937	0.143024	0.0314231	1.04585	FALSE
EFHD2	6		2.28425e-10	0	0.252253	1	1		2.00999		1		0.0434294		1		0.00561235		0.923159	0.0513319	0.0160262	1.74215	FALSE
FABP5	18		0	0	0.371222	1	1		2.3118		1		0.00368387		1		0.00351068		0.971444	0.0217503	0.00632594	0.882487	FALSE
LUZP6	10		8.33396e-14	0	0.223862	1	1		0.465057		1		1.16817		1		0.0696105		0.789757	0.154925	0.0340704	0.582782	FALSE
LUC7L3	11		0	0	0.782361	1	0	0	2.6067	1	0	0	1.14644	1	1		0.143037		0.738876	0.118487	0.0333956	1.10131	TRUE
LTA4H	6		0	0	0.175705	1	0.501918		1.25457		0	0.0915349	1.83378	0.96	1		0.0335864		0.591535	0.239664	0.116682	1.91585	FALSE
LRRFIP1	5		8.06788e-05	0	0.728587	1	0	0	2.88965	1	7.04419e-10	0	1.24734	1	0.000438744	0.0237086	0.633556	0.99	0.624573	0.186469	0.0770841	2.98306	TRUE
LRMDA	2		4.49711e-06	0	0.308438	1	0.0253505	0	2.55829	1	1		0.129902		0.21391	0	0.14343	1	0.86388	0.0477227	0.0260725	1.29257	FALSE
LMO7	2		1.09008e-14	0	0.762188	1	0	0	1.72952	1	6.18743e-09	0	1.10475	1	1		0.218034		0.614999	0.221137	0.0525586	1.95027	TRUE
LY96	8		0.000139944	0	0.37945	1	3.4185e-05	0.201549	2.29255	0.91	1		0.205733		6.96187e-09	0	0.203243	1	0.534692	0.341483	0.0528418	0.731846	FALSE
LMNA	25		0	0	0.486674	1	9.33913e-07	0	2.56703	1	1		0.32382		0.145481	0.748362	0.259601	0.63	0.456914	0.145339	0.0705741	0.698161	FALSE
LGALS2	3		0.0256907	0	0.292219	1	1		1.40357		1		0.0289423		1		0.00324443		0.956293	0.0271434	0.0165638	0.264623	FALSE
LAMTOR2	10		8.81183e-06	0	0.164071	1	1		1.4944		1		0.00122433		1		0.116927		0.729827	0.143508	0.121514	1.23007	FALSE
KRTCAP2	36		0	0	0.372834	1	1		2.23868		1		0.813455		1		0.042593		0.722384	0.234326	0.0226102	1.45885	FALSE
EMP3	23		0	0	0.377065	1	0	0	1.86033	1	0	0	0.461288	1	0.49888		0.0931635		0.514198	0.261411	0.096069	2.3005	FALSE
KLRB1	10		0.014751	0	0.316045	1	0	0	2.90476	1	0	0.894545	1.07496	0.56	0.750441		0.0528542		0.846205	0.136402	0.0148237	1.50167	FALSE
KIF5B	13		1.56168e-05	0	0.324995	1	1		1.46886		1		0.0743427		1		0.00699201		0.862807	0.083688	0.0457097	0.48208	FALSE
LGALS3	27		0	0	0.14063	1	0	0	1.96689	1	0	0	4.20899	1	1		0.058478		0.477015	0.44591	0.0591641	0.496931	FALSE
LYZ	6		0	0	0.551683	1	0	0	1.99723	1	0.00219659	0	0.130076	1	0	0	0.770837	1	0.341468	0.0848779	0.0679956	0.704625	TRUE
UQCC2	5		0.042829	0	0.208805	1	1		2.15478		1		0.134092		1		0.00942499		0.931351	0.0623895	0.00396004	0.962837	FALSE
MCTS1	4		0.0436963	0	0.199265	1	0	0	4.01274	1	0	0	1.19236	1	1		4.23896e-05		0.840669	0.151534	0.00464181	1.3812	FALSE
NDUFA1	23		0	0	0.407898	1	1		1.92295		1		0.000128554		1		0.00544273		0.974742	0.0217383	0.00258658	0.669772	FALSE
NDUFA11	23		1.49809e-05	0	0.10076	1	0	0	3.39472	1	0	0	1.27965	1	1		0.0205825		0.849955	0.144889	0.00295515	0.262096	FALSE
TXN	33		8.47721e-12	0	0.248947	1	0	0	1.90346	1	0	0	1.14291	1	0	0	0.967471	1	0.624717	0.271817	0.0809818	1.07429	FALSE
NAP1L1	34		0.00112023	0	0.256038	1	0	0	2.17652	1	4.09262e-06	0	0.981316	1	1		0.238261		0.376449	0.181709	0.123225	2.44796	FALSE
MZT2B	12		1.74204e-15	0	0.415778	1	1.39661e-08	0	0.374076	1	1.70035e-07	0	0.19147	1	1		1.82479e-16		0.768123	0.231877	1.51695e-31	0.739121	FALSE
MYL6	57		0	0	1.65235	1	0	0	2.40027	1	0	0	2.34273	1	0	0	0.977289	1	0.489454	0.319808	0.13052	2.13122	TRUE
MYL6B	4		0.022457	0	0.325573	1	3.72199e-06	0.140294	2.79824	0.94	0.00593966	0	0.99297	1	0.16275	0.0237086	0.163107	0.99	0.771241	0.198168	0.0241234	1.07109	FALSE
MYBPC1	2		0	0	0.974797	1	1.48163e-15	0	1.53586	1	0	0	1.54199	1	0.00924222	0	0.299629	1	0.432182	0.224099	0.100525	1.43404	TRUE
MS4A7	10		0	0	0.410576	1	0	0	1.12638	1	1		0.0135772		0	0	0.852187	1	0.339415	0.192088	0.137777	0.812663	FALSE
MRPS18C	5		0.00455354	0	0.416938	1	7.52577e-11	0.0253386	2.02119	0.99	0.00112855	0	0.56023	1	1		0.16789		0.666996	0.244626	0.0389537	1.13003	FALSE
MICOS13	10		7.7988e-06	0	0.225541	1	1		1.59267		1		0.0742545		1		0.00823992		0.928242	0.0600825	0.0116753	0.699058	FALSE
MICOS10-NBL1	14		1.23143e-11	0	0.23103	1	2.45672e-15	0	2.86514	1	0	0.702857	1.00745	0.34	0.0103051	0	0.210081	1	0.739062	0.163932	0.0812135	0.688461	FALSE
MGST3	25		0	0	0.433256	1	0	0	3.61582	1	0	0	1.30542	1	1		0.177718		0.676357	0.177657	0.0520786	0.659536	FALSE
UBA52	57		0	0	0.16147	1	0	0	11.0973	1	0	0	2.29373	1	0	0	0.178261	1	0.80413	0.16178	0.0142861	0.311958	FALSE
MFAP5	2		0	0	0.284423	1	0	0	2.73126	1	0	0	0.607001	1	0	0	0.558858	1	0.701748	0.120039	0.0738904	0.158112	FALSE
JPT1	5		5.87805e-16	0	0.294825	1	0	0	2.05383	1	5.44373e-05	0.0699526	0.653512	0.97	0.0151757	0	0.290163	1	0.511866	0.397865	0.0753594	0.915866	FALSE
JAM2	4		2.33175e-05	0	0.45811	1	1		1.87966		0.814289		0.237261		0.400796		0.355511		0.774244	0.133921	0.056192	0.736343	FALSE
KMT2E	13		1.92404e-06	0	0.387776	1	1.49308e-06	0.264083	2.52708	0.88	0	0	1.19147	1	9.44375e-06	0.68289	0.571655	0.67	0.596039	0.160403	0.111676	1.21053	FALSE
TALDO1	19		0	0	0.308538	1	1		0.496346		1		1.88005		1		0.00198002		0.736982	0.256768	0.00449699	3.08679	FALSE
GNLY	10		0.00514791	0	0.507184	1	0.831978		1.63673		0.00257669	0	0.53777	1	1		0.20487		0.702034	0.161846	0.110558	2.00737	TRUE
GMFG	27		0	0	0.272055	1	0	0	1.39943	1	0.01183	0	1.15681	1	1		0.0239471		0.388442	0.171507	0.127297	0.787893	FALSE
GSTO1	24		0	0	0.586269	1	0	0	2.9805	1	0	0	1.01374	1	0	0	0.767336	1	0.554336	0.222921	0.16183	1.31985	TRUE
GUK1	21		4.02356e-12	0	0.359335	1	0.000158103	0	1.49591	1	3.38717e-13	0	0.620343	1	1		0.0466609		0.71114	0.231685	0.0273046	1.45695	FALSE
HCST	18		0	0	0.349596	1	0	0	2.61471	1	0	0	0.695965	1	2.56592e-07	0	0.194953	1	0.906651	0.0735737	0.017171	0.685217	FALSE
HEXB	9		0	0	0.264428	1	0.0621656	0.201549	0.223645	0.91	0	0	1.73347	1	0	0	0.568429	1	0.490833	0.229588	0.157872	0.763614	FALSE
HNRNPA1	21		0	0	0.468035	1	0	0	1.41439	1	0	0	0.970507	1	1		0.333189		0.523669	0.293276	0.1276	1.65138	FALSE
ITM2B	15		0	0	0.336256	1	0	0	2.00754	1	5.51426e-07	0	1.00587	1	0	0	0.935344	1	0.691325	0.228126	0.0702495	2.45975	FALSE
UQCRQ	13		0.00260243	0	0.277781	1	1		1.71617		1		0.112643		1		0.0833828		0.561925	0.284814	0.129179	0.420617	FALSE
GAS5	36		0	0	0.413218	1	1		2.10223		1		0.438809		1		0.369602		0.622793	0.174189	0.108579	0.733091	FALSE
FYB1	5		0	0	1.18618	1	0	0	3.76788	1	3.72318e-05	0	1.34055	1	0.00042158	0.257246	0.782643	0.88	0.380926	0.308353	0.0860877	2.36936	TRUE
HNRNPDL	13		2.10962e-10	0	0.505272	1	1		2.2325		1		0.28965		1		0.194014		0.792169	0.0946738	0.0693461	1.17304	TRUE
FTH1	48		0	0	0.211258	1	0	0	1.96867	1	0	0	0.893857	1	0	0	2.63181	1	0.163384	0.137558	0.113705	0.408091	FALSE
GNG5	22		0	0	0.353918	1	0	0	2.57783	1	1		0.096117		0	0	0.308713	1	0.878841	0.0995089	0.0135377	0.49269	FALSE
HPGD	5		5.79698e-05	0	0.305021	1	0	0	3.22508	1	2.09808e-15	0	1.07716	1	1.21026e-14	0	0.590405	1	0.609191	0.270517	0.0666842	0.997855	FALSE
HSP90AA1	49		0	0	0.562799	1	0	0	4.20837	1	0	0	1.8266	1	1		0.137474		0.651511	0.121835	0.0744996	0.789272	TRUE
ITGB2	8		0.000967951	0	0.237681	1	1		0.681323		1		1.11233		0.0918401	0	1.10593	1	0.562791	0.226899	0.139345	0.508828	FALSE
UXT	29		2.95327e-13	0	0.309032	1	0	0	2.38348	1	0	0	0.737379	1	0.112443	0	0.453489	1	0.824394	0.0708605	0.0582014	0.972702	FALSE
UQCR10	8		0.0024335	0	0.136749	1	0	0	0.822111	1	0.0149993	0	0.169983	1	1.19811e-05	0	0.174832	1	0.765969	0.151606	0.082425	0.513891	FALSE
IRF1	17		0	0	0.505142	1	0	0	1.1072	1	1		0.483873		1		0.318975		0.662201	0.133652	0.113692	1.29878	TRUE
IL7R	4		1.62782e-09	0	0.796139	1	1		1.81252		0	0	1.12181	1	1		0.125361		0.806063	0.162733	0.0171158	2.3218	TRUE
UQCRB	36		0	0	0.839643	1	0	0	3.52613	1	1		0.807197		0	0	0.401252	1	0.859916	0.119412	0.0187455	1.79839	TRUE
FOS	19		0.00149759	0	0.185896	1	0	0	3.79474	1	1		0.0369763		1		0.0234059		0.918661	0.0515081	0.0232875	2.29455	FALSE
IFI30	14		0	0	0.299978	1	0.000140072	0	2.20738	1	0	0	0.878688	1	1		0.00047908		0.696387	0.059096	0.0361771	0.883609	FALSE
HSPB1	22		0.0393705	0	0.153694	1	1		1.61316		1		0.00633687		1		0.0090235		0.853895	0.0469706	0.0266927	0.591451	FALSE
HSP90B1	20		0.000563447	0	0.397727	1	1		1.3989		1		0.526416		2.01332e-06	0	0.111109	1	0.747961	0.220028	0.018959	1.24782	FALSE
FAU	61		0	0	0.0944966	1	0	0	2.2675	1	0	0	0.714065	1	0	0	0.103473	1	0.959639	0.0349939	0.0024944	0.186571	FALSE
FKBP11	6		0.0255656	0	0.338657	1	0	0	3.14494	1	0	0	1.26142	1	1		0.116073		0.863667	0.117385	0.0173856	0.72533	FALSE
HSP90AB1	34		0	0	0.319062	1	1		0.306784		1		0.29435		0	0	2.24447	1	0.418404	0.329939	0.187723	0.708935	FALSE
IDH3G	5		9.6357e-09	0	0.338743	1	0	0	1.90483	1	1.07229e-08	0	0.576873	1	1		0.0360409		0.837686	0.124952	0.019656	1.10517	FALSE
SRSF7	12		0.0652711	0.0224104	0.269675	0.99	2.88443e-05	0.325597	2.23391	0.85	0.684339		0.405833		8.31712e-11	0.0688462	1.10875	0.97	0.472986	0.256818	0.18178	0.995267	FALSE
ZC3H15	7		4.43305e-08	0.0224104	0.652596	0.99	1.28066e-14	0	3.01559	1	1		0.0663633		4.47308e-09	0.0464935	0.639282	0.98	0.784873	0.156568	0.0541493	2.24303	TRUE
CNIH4	4		0.015706	0.0224104	0.224426	0.99	0.000582951	0.711316	2.0887	0.66	0.0576261	0.155837	0.686623	0.93	1		0.0635839		0.664051	0.284146	0.0215309	0.629752	FALSE
MORF4L1	5		0.010048	0.0224104	0.448118	0.99	0.0781991	0.908571	2.31963	0.45	1		0.228416		1		0.00231993		0.83061	0.117221	0.0255437	2.42864	FALSE
OCIAD2	5		0.104984	0.0224104	0.405164	0.99	1		1.14238		0.628194		1.19759		1		0.0350667		0.519801	0.293016	0.140798	1.11458	FALSE
C19orf33	7		0.0605304	0.0224104	0.349249	0.99	6.42894e-05	0.0498824	0.774163	0.98	1		0.369974		1		1.26752e-16		0.903475	0.096525	2.00927e-32	0.458934	FALSE
OPTN	7		0.0286739	0.0224104	0.286427	0.99	1		1.17937		1		0.687616		1		0.466616		0.507543	0.229321	0.119848	1.19246	FALSE
DAB2	5		0.0271619	0.0224104	0.241698	0.99	1		1.05558		3.57028e-09	0	1.34471	1	1		0.149409		0.538712	0.230716	0.0662604	0.437271	FALSE
CD3D	8		0.0187307	0.0224104	0.531895	0.99	1		0.254004		0.436238		0.520182		1		0.0898907		0.609499	0.350477	0.0301694	2.03839	TRUE
ASPH	2		0.0027075	0.0224104	0.432736	0.99	0.489609		0.77426		3.09299e-05	0	0.931598	1	0.947926		0.283231		0.271634	0.216694	0.150601	1.02697	FALSE
NFKBIZ	4		0.0074242	0.0439617	0.661931	0.98	0.00124921	0.0733846	1.16451	0.97	1		0.414625		1		0.215217		0.717967	0.232548	0.0494844	1.19923	TRUE
REL	4		0.0739649	0.0439617	0.415125	0.98	1		1.26335		1		0.996925		1		0.445445		0.683728	0.237775	0.0744121	0.857054	FALSE
RBP7	5		0.0272088	0.0439617	0.152884	0.98	1		2.15042		1		0.140165		1		0.0100177		0.935444	0.0593765	0.00269147	0.48908	FALSE
FCGRT	10		0.0103727	0.0439617	0.218884	0.98	0	0	3.22671	1	1		0.0472188		1		0.0376063		0.620191	0.317296	0.0395087	0.914417	FALSE
ITGB1	14		0.0608232	0.0439617	0.455162	0.98	1		2.42641		1		0.169347		1		0.0111652		0.903101	0.0720329	0.0159085	1.2392	FALSE
SNHG29	3		5.20362e-05	0.0439617	0.649016	0.98	4.94617e-05	0.0253386	1.40339	0.99	0.0140897	0.0915349	0.626231	0.96	0.292082		0.529682		0.455499	0.213156	0.182985	2.16577	TRUE
unknown_chrM_0	8		0.0547118	0.0651104	0.420201	0.97	1		0.301596		0	0	1.39659	1	0.0242639	0	0.307054	1	0.0838201	0.0589663	0.0507003	1.76109	FALSE
FAM50A	5		0.0938128	0.0651104	0.322932	0.97	1		0.151863		1		0.0225014		1		0.157364		0.644857	0.186256	0.0896471	1.31691	FALSE
RNF181	14		0.000636028	0.0651104	0.443009	0.97	3.07328e-11	0	0.725081	1	1		0.929547		1		0.304602		0.563188	0.336747	0.047173	0.933981	FALSE
NCOR1	4		0.00180712	0.0651104	0.532216	0.97	4.839e-15	0	2.50717	1	2.56e-07	0.112844	0.729839	0.95	1		0.00979647		0.780261	0.15578	0.0259668	3.36059	FALSE
HNRNPA2B1	16		0.000252827	0.086	0.45939	0.96	0	0	2.30472	1	0.34686		0.772705		1		0.407334		0.551157	0.201712	0.157333	1.98999	FALSE
IGF1	2		0.0954679	0.086	0.313537	0.96	0.0980756	0.161891	0.315098	0.93	1		0.0309016		0.845833		0.128498		0.630149	0.270241	0.0996098	0.440253	FALSE
NDUFS4	8		0.0939476	0.086	0.481154	0.96	1		0.166108		0.00721365	0.0244776	0.891824	0.99	1		0.0929593		0.839177	0.1311	0.0218394	3.35215	FALSE
ARHGAP18	3		0.0977428	0.106173	0.328892	0.95	1		2.22826		1		0.0530917		0.663331		0.228679		0.789889	0.0856496	0.038101	1.11905	FALSE
ASAP1	2		0.103718	0.106173	0.211638	0.95	1		1.82669		1		0.122245		1		0.0748694		0.767805	0.12492	0.0596868	0.690729	FALSE
SP110	3		0.0235639	0.106173	0.317931	0.95	0.100498	0.0956391	1.32724	0.96	1		0.8516		0.171008	0.0237086	0.321928	0.99	0.449618	0.265065	0.148914	1.67013	FALSE
NEXN	4		0.00623299	0.106173	0.515912	0.95	0	0	1.96776	1	1.77882e-07	0	1.65102	1	1		0.591924		0.395001	0.2757	0.198747	0.975895	FALSE
SRSF11	12		0.0368351	0.127015	0.42197	0.94	0	0	2.27027	1	2.84056e-07	0.240533	0.696584	0.11	1		0.289973		0.703205	0.135995	0.104391	1.02786	FALSE
TLN1	12		0.0147781	0.14773	0.52465	0.93	1		0.418019		0	0.322271	1.60577	0.85	0	0.257246	0.664327	0.88	0.761773	0.17559	0.0323327	0.969497	FALSE
ABI3BP	2		0.0547118	0.168318	0.404951	0.92	0.563854		0.370189		0.334972		0.51075		1		0.177167		0.274665	0.145215	0.11445	0.238847	FALSE
CTSC	3		0.0379487	0.18878	0.424664	0.91	0.15533		0.399075		0.443894		0.360576		1		0.0242954		0.794147	0.114061	0.0676476	0.474879	FALSE
ISG20	4		0.0736211	0.209119	0.22919	0.9	2.01498e-08	0.727451	2.42259	0.35	1		0.13815		1		0.0456231		0.925906	0.0452614	0.0216223	1.18121	FALSE
NDUFB11	16		0.0918396	0.22864	0.22513	0.89	0.235961		0.183818		1		9.24209e-17		1		4.97502e-17		1	3.51503e-31	2.16467e-33	0.928881	FALSE
CRELD2	2		0.0127291	0.22864	0.1748	0.89	0	0.243763	2.73385	0.89	1		0.122022		1		0.0335582		0.82961	0.140936	0.0210744	0.28219	FALSE
MAGOH	5		0.00787307	0.247928	0.637131	0.88	3.00462e-05	0.305979	1.64734	0.86	0.6283		0.71309		1		0.123576		0.797117	0.171936	0.0303916	1.22586	FALSE
SFPQ	14		0.000404315	0.247928	0.415382	0.88	0.727972		0.750051		6.83809e-10	0.466552	1.05219	0.78	1		0.223293		0.549007	0.211091	0.110749	1.08503	FALSE
PTGES3	2		0.00314462	0.288383	0.717263	0.86	3.76952e-09	0	3.06203	1	1.55397e-05	0.0915349	0.79771	0.96	1		0.0350811		0.906578	0.0539893	0.0233828	2.20646	FALSE
RPL22L1	5		0.0114682	0.30806	0.388122	0.85	1		0.179129		0.0706054	0.0915349	0.358022	0.96	0.00157835	0.0464935	0.298981	0.98	0.64442	0.210782	0.144798	6.88052	FALSE
PYCARD	4		0.00686885	0.368571	0.398268	0.82	0.182284		0.431854		0.400704		0.180013		1		4.35937e-16		0.928314	0.071686	9.99176e-31	2.13825	FALSE
ADSL	3		0.00272463	0.428724	0.857648	0.79	9.82276e-08	0.161891	1.65894	0.93	0.626573		0.975338		0.70777		0.260318		0.64601	0.287438	0.0440295	1.86241	FALSE
CHD2	3		0.12233	0.488521	0.393056	0.76	0.496378		1.64727		1		0.523189		0.00249699	0	0.964837	1	0.497883	0.169806	0.131589	1.86967	FALSE
TCEA3	4		0.0560857	0.547965	0.678635	0.27	1		0.163108		1		0.518294		1		0.393847		0.806831	0.0743163	0.0617803	1.76647	FALSE
TAF1D	9		0.0898916	0.627294	0.394555	0.69	0.00635535	0.201549	1.16062	0.91	1		0.407298		1		0.613333		0.286566	0.254391	0.164737	2.45268	FALSE
UBE2D3	5		1.22162e-06	0.74651	0.489806	0.63	0	0.5512	2.0395	0.74	1		0.128002		3.29946e-05	0.238667	0.292058	0.89	0.816243	0.0804164	0.0427592	1.21653	FALSE
STK4	2		0.0183647	0.965614	0.346876	0.52	0.528862		0.225813		0.000125434	0.303436	0.436198	0.86	1		0.165434		0.680995	0.172807	0.146198	1.64732	FALSE
MGLL	8		0.0513599	0.982857	0.311864	0.49	4.37734e-06	0.406869	4.95099	0.81	1		0.385082		1		0.0890615		0.684775	0.162392	0.0373927	1.3237	FALSE
DHX36	3		0.00784025	1	0.593451	0.5	2.26183e-08	0.201549	1.55739	0.91	0.111123	0	0.195533	1	0.390141		0.667067		0.590776	0.228604	0.108487	2.13409	FALSE
A2M	7		1		0.102549		1		0.258398		0.732637		0.231491		1		0.015981		0.880638	0.0934986	0.0225635	0.0768161	FALSE
AAMDC	2		1		0.00283216		1		0.751156		1		1.25163		1		0.163603		0.464414	0.263746	0.107026	0.710481	FALSE
ACAP1	2		1		0.0620174		1		0.050637		1		1.14874e-17		1		2.99809e-18		1	1.60225e-31	5.61491e-63	6.93889e-18	FALSE
ACTA1	2		1		0.065113		1		0.000917898		1		0.000919332		1		0.00076692		0.428441	0.212898	0.111562	2.17203	FALSE
ACTA2	6		1		0.131019		1		0.0219306		1		0.00921895		1		0.00199615		0.925376	0.0559644	0.00997119	1.25468	FALSE
ACTG2	3		1		0.150152		1		0.156471		1		0.02757		1		6.7683e-18		0.991089	0.00891135	1.69963e-32	0.095919	FALSE
ADAMTS9	2		1		0.149672		1		1.48997		7.70235e-08	0	0.806203	1	0.390823		0.253825		0.452128	0.240669	0.104322	0.391228	FALSE
ADH1B	2		1		0.130602		1		0.0561966		1		0.00818668		1		0.0123737		0.536146	0.373478	0.0570508	0.19384	FALSE
ADRM1	4		1		0.39587		1		0.39748		1		0.0162288		1		1.94298e-16		0.950598	0.0494018	5.54682e-31	5.54938	FALSE
AGR2	2		1		0.123091		1		0.100504		1		4.70215e-17		1		6.16069e-18		1	2.64028e-32	1.23186e-63	0	FALSE
AGR3	4		1		0.227126		1		0.0278611		1		0.457349		1		0.0174624		0.630401	0.282006	0.0553123	0.186979	FALSE
AK1	3		1		0.150329		1		0.122743		1		3.54719e-17		1		2.62901e-18		1	9.75574e-32	2.22737e-63	0	FALSE
AKR1C3	6		0.591513		0.12948		1		1.24955		1		0.111682		1		0.0152317		0.853996	0.141014	0.00499042	0.25302	FALSE
ALDOA	23		1		0.0907189		0	0	5.09022	1	4.34892e-14	0	3.95453	1	1		0.0744599		0.283985	0.171952	0.0615412	0.661228	FALSE
ALKBH7	8		1		0.014929		1		0.0337105		1		0.052362		1		6.41824e-17		0.786686	0.213314	2.11983e-31	1.88927	FALSE
ANKRD2	2		1		0.107575		1		0.930783		1		0.543158		1		0.06052		0.634824	0.353525	0.0111043	0.00305582	FALSE
ANP32B	4		1		0.0115854		1		1.09249		1		0.327406		1		0.0631629		0.57885	0.262397	0.0709892	1.1511	FALSE
ANXA11	3		1		0.0764969		1		0.100809		1		0.0865629		1		0.0676328		0.490401	0.457157	0.0524421	0.0647393	FALSE
ANXA1	17		0.609111		0.539173		3.22578e-06	0.118216	4.21224	0.95	1		0.0642246		1		0.30522		0.823222	0.137762	0.0193299	0.879669	FALSE
ANXA2	13		1		0.0621865		1		0.0028737		1		0.00292336		1		0.00139034		0.689897	0.227014	0.0382151	1.04552	FALSE
ANXA5	3		1		0.276385		1		0.0540872		1		0.247468		1		0.0611161		0.750167	0.155767	0.0940666	3.89452	FALSE
APBB1IP	3		1		0.124918		1		1.64391		1		0.395429		1		0.0411623		0.626265	0.286211	0.0510503	0.532159	FALSE
APLP2	12		1		0.120435		1		0.946043		1		1.26353		1		0.563602		0.29717	0.227002	0.189149	1.19863	FALSE
APOC1	9		1		0.0574549		1		3.04486		1		0.241508		1		0.0180316		0.782499	0.0629922	0.0554814	0.287252	FALSE
APOD	3		0.502186		0.048525		0	0	2.85399	1	0	0	0.884472	1	1		0.0288142		0.574438	0.0828878	0.0741983	1.10647	FALSE
APPL1	4		1		0.410641		1		0.163555		1		0.350523		1		0.268864		0.771106	0.19911	0.029784	1.8706	FALSE
APRT	5		1		0.0834025		1		0.136701		0.54593		0.365775		0.935133		0.147195		0.641801	0.247038	0.111162	0.825396	FALSE
ARHGAP29	7		0.380826		0.374125		1		0.841464		0.702774		0.244352		1		0.0918536		0.313373	0.241387	0.173438	1.53513	FALSE
ARID4B	9		1		0.271687		0.00124921	0.963028	1.61659	0.48	0.00171089	0.0244776	1.50765	0.01	0.00159029	0.114013	0.746301	0.95	0.474998	0.282664	0.0689931	1.18266	FALSE
ARL6IP4	20		1		0.182856		1		0.0021239		1		0.00771883		1		0.0136027		0.449028	0.307971	0.195489	2.46347	FALSE
ARPC1B	14		1		0.00621467		1		0.00555857		1		5.0317e-17		1		2.28436e-19		1	8.05107e-29	1.03935e-56	1.73472e-18	FALSE
ARPC5	5		1		0.108997		1		0.0102054		1		0.102291		1		0.0139825		0.597097	0.220332	0.135285	0.349485	FALSE
ATF3	5		1		0.100916		1		0.160943		1		0.121939		1		0.119185		0.438419	0.143177	0.133717	0.652358	FALSE
ATG3	2		0.637515		0.117069		1		1.16432		1		0.555443		1		0.140998		0.843529	0.128696	0.0277754	0.717869	FALSE
ATOX1	7		1		0.159962		0	0	3.11248	1	0.262308		0.227744		0	0	0.93888	1	0.670047	0.208287	0.102372	0.659606	FALSE
ATP2B1	3		1		0.239226		1		0.102816		1		0.015254		1		0.0380479		0.398444	0.227576	0.171299	0.766817	FALSE
ATP5F1A	7		1		0.0245182		1		0.020019		1		1.59476e-17		1		4.87167e-19		1	6.93929e-31	2.76037e-60	1.04083e-17	FALSE
ATP5F1B	8		1		0.102463		1		0.0866585		1		0.0190874		1		3.00601e-17		0.972591	0.0274086	1.65367e-31	2.31741	FALSE
ATP5F1D	24		1		0.0748224		1		0.0111993		1		0.00812067		1		0.0556401		0.896743	0.089513	0.0122062	0.028909	FALSE
ATP5IF1	8		1		0.138433		1		0.126372		1		3.45777e-17		1		1.00405e-17		1	4.41357e-32	1.41813e-62	1.22702	FALSE
ATP5MC1	5		1		0.0986544		1		0.0150353		1		0.075349		1		0.049384		0.990313	0.00572653	0.00396008	2.51229	FALSE
ATP5MC2	29		1		0.0106447		1		0.00181149		1		0.00236316		1		0.0132044		0.854176	0.080974	0.0417157	0.615043	FALSE
ATP5MC3	11		1		0.0703649		1		0.029972		1		0.00211747		1		0.123206		0.977637	0.0201122	0.00225124	0.713149	FALSE
ATP5ME	10		1		0.00998907		1		8.89907e-05		1		0.0164084		1		2.03468e-17		0.836297	0.163703	9.01757e-31	3.46945e-18	FALSE
ATP5MF	20		1		0.135418		0	0	2.57335	1	0	0	1.08159	1	0	0	0.13039	1	0.803084	0.170704	0.0172211	0.600136	FALSE
ATP5PF	28		1		0.108579		1		0.0387365		1		0.0374199		1		0.36518		0.871115	0.102246	0.0147958	1.35844	FALSE
ATP6V0B	5		1		0.0316544		1		0.0240838		1		0.0130949		1		2.07119e-17		0.981065	0.0189352	3.40235e-31	1.38778e-17	FALSE
ATP6V1D	2		1		0.232379		1		0.233124		1		0.0194918		1		3.60608e-18		0.98314	0.0168597	2.01494e-32	0.0475092	FALSE
AUP1	8		1		0.217169		0.156822		1.22442		0.588257		0.509326		1		0.048246		0.475048	0.382405	0.0988905	0.737573	FALSE
BAZ1A	6		1		0.345719		1		0.052706		1		0.00622712		1		0.0191298		0.459072	0.216947	0.175798	1.10477	FALSE
BBX	2		1		0.288668		1		0.0139071		1		0.287607		1		0.00228274		0.865806	0.0872427	0.0465852	1.81655	FALSE
BCL7C	6		0.456712		0.141212		1		1.4133		1		0.127086		1		0.0461691		0.828161	0.140315	0.0300681	3.47581	FALSE
BID	4		1		0.0802567		1		0.0712536		1		0.00870811		1		2.18875e-17		0.77872	0.22128	5.30243e-31	2.77556e-17	FALSE
BLOC1S1-RDH5	18		1		0.119514		1		1.90628		1		0.201687		1		0.286018		0.953549	0.030546	0.011071	0.841175	FALSE
BPIFB1	2		0.199352		0.0609022		1		5.86698		0.0416199	0.112844	0.767784	0.95	1		0.511988		0.821132	0.0723487	0.0578307	0.893395	FALSE
BTF3	12		1		0.0619647		1		0.00607212		1		0.00755539		1		0.0582187		0.893705	0.102578	0.00276687	1.38778e-17	FALSE
BUD31	4		1		0.161078		1		0.0126464		1		0.00347373		1		0.00670344		0.458373	0.408552	0.0855737	0.905279	FALSE
C11orf58	4		1		0.248911		1		0.927183		0.000132808	0.775768	0.966473	0.62	0.899661		0.549414		0.712341	0.233056	0.0343822	0.949372	FALSE
C1orf54	3		0.244969		0.244689		0.373013		1.21211		0.000780221	0	0.86719	1	1		0.255218		0.591301	0.181956	0.101302	0.506953	FALSE
CALD1	9		1		0.305016		0	0	1.96525	1	2.09808e-15	0	1.87185	1	5.86481e-07	0	0.417802	1	0.45669	0.205848	0.12227	1.05823	FALSE
CALR	9		0.942285		0.524286		1.89773e-13	0.841161	1.87643	0.41	0.547989		0.346623		1		0.174233		0.602953	0.158969	0.0600185	1.18878	FALSE
CANX	2		0.522694		0.10922		0.013831	0.285103	0.372415	0.87	0.560048		0.238278		1		0.00945524		0.885931	0.0697266	0.029203	1.87244	FALSE
CASP1	6		1		0.189854		1		0.0421416		1		0.0231344		1		0.135746		0.479498	0.17508	0.161188	0.0826568	FALSE
CASP4	10		0.168053		0.354579		1		1.1253		1		0.44052		1		0.685763		0.45616	0.309778	0.218223	0.809521	FALSE
CATSPER1	2		1		0.255666		1		0.114829		1		0.199095		1		0.161538		0.480158	0.261477	0.187119	0.0991353	FALSE
CCDC25	3		0.562309		0.609357		1		0.848123		1		0.141213		1		0.054859		0.483474	0.395359	0.0621176	2.0274	FALSE
CCDC88A	2		0.148987		0.793999		1		0.35173		0.0344243	0.0475362	0.293988	0.98	1		0.0574707		0.460024	0.217234	0.15153	2.20056	FALSE
CCDC91	3		1		0.20301		2.35093e-09	0.945949	2.14964	0.47	1		0.215336		1		0.350589		0.536429	0.151587	0.110196	0.746943	FALSE
CCNH	3		1		0.142999		1		0.567464		1		0.113891		1		0.0202858		0.400305	0.238132	0.198151	0.846471	FALSE
CCNL1	8		0.236511		0.426806		1		1.31709		1		1.01428		1		0.342693		0.568983	0.164238	0.117519	1.64211	FALSE
CCT4	3		1		0.0644157		1		0.0472152		1		0.0200784		1		0.0304006		0.520663	0.475793	0.00354361	2.59486	FALSE
CD1C	2		0.98688		0.0463207		1		0.0462011		0.821366		0.0516543		1		5.0845e-17		0.954811	0.045189	2.23772e-32	1.10483	FALSE
CD36	3		0.181143		0.203892		0.000500225	0.140294	2.17058	0.94	1		0.484009		1		0.14736		0.547989	0.183569	0.114468	0.312857	FALSE
CD37	6		0.726844		0.292133		1		2.20518		1		0.405221		1		0.0865689		0.5786	0.251779	0.105261	0.648478	FALSE
CD3G	2		1		0.363256		1		0.0309863		1		0.344248		1		0.0728232		0.60188	0.244524	0.0873482	0.823278	FALSE
CD48	3		1		0.118125		1		0.0896921		1		0.0260769		1		0.0590308		0.598421	0.264574	0.137005	4.16334e-17	FALSE
CD52	8		1		0.0278203		1		0.00102672		1		0.0257744		1		0.0109866		0.928608	0.0497874	0.0216042	1.73472e-17	FALSE
CD68	4		1		0.0813933		1		0.00518733		1		0.00153559		1		0.000428964		0.193401	0.0995482	0.0703772	0.294444	FALSE
CDC40	2		1		0.0972055		1		1.73524		1		0.0518232		1		0.0376394		0.897984	0.0843326	0.017227	1.86445	FALSE
CFAP36	4		1		0.22434		4.37721e-15	0.0956391	3.56548	0.96	1		0.818856		0.00130845	0.197669	0.529364	0.91	0.700072	0.199845	0.0549018	1.33277	FALSE
CFH	3		0.814333		0.095903		1		0.753471		1		0.594107		1		0.835107		0.611731	0.143228	0.101886	0.752697	FALSE
CFP	4		1		0.0470579		1		0.0508994		1		0.0437354		1		2.70331e-18		0.673395	0.326605	5.36801e-30	6.93889e-18	FALSE
CHD1	5		1		0.178802		1		0.374907		1		0.974924		1		0.0831719		0.372462	0.277788	0.140352	0.637243	FALSE
CHI3L2	3		1		0.133324		1		0.0156588		1		0.137196		1		0.0123161		0.622159	0.371375	0.00646588	0.070847	FALSE
CHMP2A	15		1		0.0507237		1		0.0463017		1		0.00048282		1		2.17706e-17		0.952506	0.0474936	1.8669e-31	6.93889e-18	FALSE
CHORDC1	2		1		0.120386		1		0.1098		1		0.0046074		1		2.7012e-17		0.840917	0.159083	1.70535e-32	0.875221	FALSE
CHURC1-FNTB	7		1		0.268144		0	0	2.06677	1	0	0	0.857103	1	1		0.310047		0.729412	0.155494	0.10689	0.704106	FALSE
CIAO2B	17		1		0.0439354		1		0.00223192		1		0.00546212		1		0.0449064		0.650746	0.198722	0.148379	6.93889e-18	FALSE
CIB1	14		1		0.0107459		1		0.00259216		1		0.0154399		1		0.00578233		0.901056	0.0989384	5.59783e-06	0.00669307	FALSE
CKM	2		1		0.056134		1		0.351326		1		0.077663		1		0.387218		0.162635	0.099593	0.0923182	0.0642453	FALSE
CLIC3	4		1		0.00897681		1		0.00359715		1		0.0439832		1		1.22761e-17		0.655229	0.344771	5.06158e-32	0.171869	FALSE
CMC1	2		1		0.107106		1		0.0396562		1		0.134378		1		0.39322		0.678027	0.228115	0.0726063	0.430056	FALSE
CNPY2	8		1		0.0359132		1		0.000150804		1		0.00537575		1		0.00556506		0.524835	0.435879	0.0375918	1.7404	FALSE
COL14A1	2		1		0.0264737		1		2.09269		1		0.00672411		1		0.00993256		0.976143	0.0125316	0.0113256	0	FALSE
COL1A2	3		1		0.108745		1		0.00360493		1		0.00380318		1		0.00471407		0.579239	0.387971	0.0291537	4.16334e-17	FALSE
CORO1A	12		1		0.10822		1		0.084671		1		5.37087e-06		1		0.0487974		0.603272	0.159652	0.143542	0.892751	FALSE
COX17	2		1		0.288657		1		0.0196739		1		0.0624741		1		0.287379		0.851049	0.0889072	0.0486688	1.51967	FALSE
COX5A	22		1		0.204436		1		0.220983		1		0.0690202		1		0.156231		0.503689	0.271955	0.10551	1.95957	FALSE
COX6A2	2		1		0.00919891		1		1.4251		1		0.00720702		1		6.92718e-16		0.998015	0.00198468	1.44757e-31	0.158349	FALSE
COX6B1	38		1		0.156043		0	0	3.74274	1	0	0	1.3562	1	1		0.04238		0.775793	0.208903	0.0074157	0.356733	FALSE
COX7A1	9		0.221846		0.222149		1		1.4055		1		0.00803602		1		8.83352e-16		0.997119	0.00288058	3.75866e-31	0.378523	FALSE
COX7B	18		1		0.0230641		1		2.44125		1		0.0309471		1		0.0212452		0.956734	0.0291308	0.0115598	0.313925	FALSE
COX7C	21		1		0.04921		1		0.00693416		1		0.00741619		1		0.0530784		0.708999	0.244691	0.0285017	0.839755	FALSE
CPNE3	3		1		0.0961846		1		0.0949394		1		0.0193432		1		6.50411e-18		0.96783	0.0321703	9.89888e-33	4.16334e-17	FALSE
CRYAB	6		1		0.160809		1		0.17597		1		0.0277931		1		3.32358e-17		0.993053	0.00694705	1.14429e-31	0.121037	FALSE
CSNK1A1	8		0.151767		0.381748		1.11445e-06	0	2.02546	1	0.353306		0.5011		1		0.293315		0.66493	0.087571	0.0747941	0.9716	FALSE
CSRP2	7		0.898355		0.18594		0	0.0733846	3.17749	0.97	1		0.185722		1		0.0402664		0.747364	0.159604	0.0744856	0.267539	FALSE
CST3	20		1		0.0135274		1		0.0011708		1		0.000481248		1		0.00421497		0.618079	0.345306	0.0170857	1.73472e-18	FALSE
CST7	3		1		0.0455269		1		0.0459137		1		0.00111148		1		7.18897e-18		0.627635	0.372365	1.09504e-31	1.38778e-17	FALSE
CSTB	4		1		0.168793		1		0.184679		1		0.000837772		1		0.0217385		0.815492	0.0927397	0.0760977	0.131091	FALSE
CTSG	2		1		0.0267071		1		0.0218062		1		5.60222e-18		1		7.3631e-19		1	7.74143e-32	6.23413e-64	3.46945e-18	FALSE
CTSW	4		1		0.0412568		1		0.0336861		1		2.97934e-17		1		2.2177e-18		1	6.46677e-31	5.7823e-62	1.38778e-17	FALSE
CXCL12	3		1		0.171423		1		1.3747		1		0.0143272		1		0.0694504		0.90628	0.0837762	0.00994403	0.384354	FALSE
CXCL17	2		1		0.12355		1		0.17687		1		0.0448642		1		1.12852e-17		0.771192	0.228808	5.64158e-33	0.0762387	FALSE
CYB5A	2		1		0.0719332		1		0.0718179		1		0.00433146		1		2.02417e-18		0.99996	4.01117e-05	5.11762e-32	1.38778e-17	FALSE
CYBB	2		0.372162		0.166441		1		0.802235		1		0.476628		1		0.839376		0.438827	0.311893	0.244846	0.223538	FALSE
DCXR	8		1		0.124399		0	0	2.16041	1	0	0	0.695805	1	1		0.114084		0.845197	0.0804115	0.0336307	0.292907	FALSE
DDX17	4		1		0.0677801		1		1.05236		1		0.731251		1		0.171662		0.735071	0.189178	0.0738816	6.18584	FALSE
DDX3X	9		1		0.205355		1		0.882949		1		0.581791		1		0.219326		0.382321	0.203584	0.163697	2.15686	FALSE
DDX46	7		1		0.0886625		7.89908e-08	0.183682	2.7984	0.08	4.16575e-15	0.240533	1.26402	0.89	0.53091		0.310615		0.802776	0.14145	0.0320007	0.69339	FALSE
DDX5	10		1		0.0643489		1		0.0401406		1		0.0453536		1		0.00353293		0.567673	0.339456	0.092871	0.243445	FALSE
DGUOK	2		1		0.271035		0.63369		0.304736		1		0.114489		1		0.0386748		0.460839	0.346304	0.180691	5.31194	FALSE
DHRS7	2		1		0.0100617		1		0.00893086		1		8.83297e-05		1		0.00319714		0.417231	0.346334	0.236434	3.46738	FALSE
DNAJA1	14		0.172753		0.392184		1		2.3085		2.05574e-10	0.667119	1.20499	0.68	8.15423e-15	0	0.383	1	0.768077	0.137811	0.0397147	1.15754	FALSE
DNAJC1	6		1		0.257324		1		1.41535		1		0.0740866		1		0.000630193		0.734737	0.256902	0.0083603	2.97656	FALSE
DNAJC21	3		0.667377		0.452341		0.0142677	0.201549	1.49511	0.91	1		0.549349		1		0.423043		0.477882	0.299677	0.100087	1.35644	FALSE
DNAJC8	2		0.330548		0.257448		0.423791		1.40199		1.68302e-08	0.702857	1.09145	0.66	1		0.00839527		0.841429	0.14689	0.00701433	1.12732	FALSE
DPT	2		1		0.0823696		1		0.0067451		1		1.70178e-16		1		0.0125766		0.584142	0.150051	0.133087	0	FALSE
DSTN	2		1		0.160943		1		0.0204252		1		0.0285607		1		0.148591		0.9672	0.0261983	0.00660143	0.21106	FALSE
DUT	5		1		0.0153135		1		0.00324373		1		0.000260755		1		0.0240573		0.864994	0.132971	0.00203507	0.485815	FALSE
ECH1	2		1		0.0829502		1		0.0748897		1		0.0112016		1		1.79244e-17		0.709232	0.290768	1.1364e-32	0.432544	FALSE
ECSCR	5		0.749268		0.225116		1		0.22197		1		0.263558		1.55815e-05	0	0.497161	1	0.739962	0.171733	0.0550651	0.770686	FALSE
EIF3D	6		1		0.0450848		1		0.0447847		1		0.0132381		1		1.8113e-17		0.844839	0.155161	1.80717e-30	2.08167e-17	FALSE
EIF3E	30		0.869941		0.225403		1		1.11784		1		0.874931		1		0.0819543		0.431784	0.275411	0.0967808	0.782878	FALSE
EIF3H	8		1		0.161388		1		0.0279961		1		0.137497		1		0.0513417		0.990854	0.00593752	0.0032082	0.845467	FALSE
EIF3K	41		0.971613		0.0690268		0.066657	0	2.43327	1	1		0.187026		1		0.0866275		0.84171	0.0744878	0.0575292	0.61771	FALSE
EIF3L	27		1		0.0329927		1		1.99303		1		0.0388533		1		0.0166318		0.961076	0.0145613	0.0117635	0.181832	FALSE
EIF4A1	28		1		0.143119		1		0.159875		1		0.0059788		1		0.000524978		0.843488	0.1357	0.0114443	0.515367	FALSE
EIF4A3	11		1		0.148621		1		0.0369944		1		0.049566		1		0.141102		0.647037	0.260933	0.0746089	0.522628	FALSE
EIF4B	9		0.921731		0.402995		2.15654e-07	0.0253386	1.93772	0.99	0.0138647	0.0699526	1.26583	0.97	1		0.200518		0.602679	0.316079	0.052053	1.16061	FALSE
EIF5	9		1		0.0832084		1		0.00725908		1		0.111659		1		0.00243693		0.832653	0.0838524	0.0506299	1.84096	FALSE
ELF1	7		0.971613		0.247011		1		1.41114		1		0.10745		1		0.00329231		0.828658	0.159942	0.00935092	0.910298	FALSE
ELOB	35		1		0.0285764		1		2.10498		0	0	0.241533	1	0.317814		0.0637422		0.961507	0.0146591	0.0105399	0.526953	FALSE
ELOC	4		0.625242		0.279743		0.308223		1.44499		0.0263538	0.963918	1.26783	0.48	1		0.417709		0.475905	0.291069	0.114593	0.740328	FALSE
EMC3	4		1		0.110799		1		0.00673518		1		0.0213023		1		0.0825693		0.841223	0.111104	0.0299201	1.12252	FALSE
ENO3	2		1		0.0201594		1		0.0643374		1		0.431212		1		1.18214		0.857895	0.104682	0.0180711	0.356656	FALSE
ENY2	7		1		0.0889181		1		0.0404639		1		0.206775		1		0.105408		0.919314	0.0772769	0.00340916	1.59716	FALSE
EPB41L4A-AS1	9		1		0.0949518		1		0.757249		1		0.0983113		1		0.056422		0.621879	0.334562	0.0435583	0.254127	FALSE
EPS8	2		1		0.337884		1		0.119487		1		0.292479		0.881855		0.232366		0.408305	0.358042	0.169135	0.0981638	FALSE
ERCC1	6		1		0.252065		0.417095		1.59829		1		0.446326		0.0946274	0.336941	0.276797	0.84	0.559826	0.31248	0.046919	0.95149	FALSE
ERGIC3	4		1		0.136027		1		0.0419177		1		0.0707059		0.573206		0.221759		0.70699	0.174369	0.118641	1.31441	FALSE
ERLEC1	4		1		0.0895597		1		0.0187697		1		0.0807507		1		0.0014542		0.796202	0.191321	0.0124766	5.41137	FALSE
ERP44	3		1		0.0535288		1		0.0437061		1		1.7352e-17		1		4.64415e-18		1	7.46761e-32	7.24046e-35	2.08167e-17	FALSE
ESD	5		1		0.0893237		1		0.0729325		1		2.90263e-17		1		3.97233e-18		1	6.79734e-32	6.05574e-63	1.88076	FALSE
ETFB	4		0.699974		0.147936		1		1.25463		1		0.927554		1		0.30462		0.598644	0.227381	0.0939238	0.700971	FALSE
ETHE1	4		0.330548		0.171196		0	0	3.41167	1	0.00233805	0	0.213224	1	0	0	0.378744	1	0.899609	0.0393672	0.0297441	0.939144	FALSE
ETS2	2		1		0.09335		1		0.0862201		1		0.036963		1		3.95687e-17		0.998253	0.00174706	1.22934e-31	0.091462	FALSE
EZR	6		1		0.239861		1		0.651463		1		1.23926		1		0.0443292		0.677708	0.261968	0.049049	1.42211	FALSE
FABP4	12		0.416391		0.117406		1		2.15517		1		0.204555		0.460415		0.0659553		0.798774	0.133129	0.021792	0.499568	FALSE
FAM114A1	2		1		0.0989473		1		0.0192654		1		0.0882477		1		1.2093e-17		0.981084	0.0189165	4.80807e-34	1.38778e-17	FALSE
FBLN1	2		1		0.236394		1		0.0449644		1		0.0211079		1		0.0838815		0.504954	0.277103	0.182331	0	FALSE
FBP1	7		1		0.146657		2.93303e-15	0.0733846	2.74075	0.97	1.22371e-07	0.0475362	0.916734	0.98	1		0.23004		0.530785	0.14521	0.129533	0.559101	FALSE
FCER1G	7		0.869941		0.0772504		1		0.566477		1		0.888004		1		0.956179		0.630671	0.237505	0.111087	1.05814	FALSE
FDPS	4		1		0.0770231		1		0.077574		1		0.0894475		1		0.0408714		0.791468	0.156273	0.0522584	2.77556e-17	FALSE
FIBP	2		1		0.099932		1		0.00686613		1		0.0704147		1		0.0772625		0.699814	0.192804	0.107382	0.827047	FALSE
FIS1	9		1		0.113894		1		0.018828		1		0.0320326		1		0.0613012		0.839711	0.139207	0.0183717	1.96435	FALSE
FKBP2	25		1		0.0769776		1		2.29381		1		0.336111		1		0.030463		0.691007	0.239104	0.0266593	0.351979	FALSE
FTL	53		1		0.0482375		0	0	8.66386	1	0	0	2.05049	1	0	0	1.77856	1	0.135393	0.0803697	0.0591975	1.03508	FALSE
FXYD1	7		1		0.118152		1		0.677541		1		0.455559		1		0.947844		0.435578	0.221932	0.180067	0.550705	FALSE
FXYD3	6		0.537949		0.193726		0	0	3.1882	1	2.35294e-08	0.0244776	0.605949	0.99	1		0.449385		0.664366	0.153977	0.134724	0.365286	FALSE
FXYD5	5		1		0.293641		1		0.0697951		1		0.0330626		5.15724e-12	0.732273	1.04169	0.64	0.490312	0.173758	0.14233	0.987362	FALSE
GADD45B	11		1		0.182505		1		1.24663		1		0.00459031		1		0.0337112		0.404158	0.130276	0.0976106	0.812389	FALSE
GAPDH	39		1		0.0572588		0	0	5.79616	1	0	0	4.64863	1	1		0.605199		0.356634	0.205095	0.0664432	0.417093	FALSE
GLIPR2	2		1		0.200959		1		0.0129659		1		0.187574		1		0.0762642		0.828628	0.168061	0.00331117	5.55112e-17	FALSE
GPS2	2		1		0.447445		1		0.0764026		1		0.278341		1		0.365536		0.719414	0.242488	0.0380974	0.975277	FALSE
GPX4	38		1		0.0252829		1		2.75517		1		0.00121906		1		0.00814841		0.979216	0.0122853	0.00438264	0.0589	FALSE
GRB2	2		0.223521		0.13134		0.000826706	0	1.13742	1	0.982973		0.234397		0.523869		0.520796		0.438346	0.343083	0.191793	0.258575	FALSE
GSTA1	2		1		0.0673393		1		0.0618477		1		0.0270662		1		2.27522e-17		0.831125	0.168875	3.71521e-31	0	FALSE
GSTK1	2		1		0.0365636		1		0.0298541		1		2.62522e-17		1		1.37009e-18		1	6.74107e-31	1.18912e-61	6.93889e-18	FALSE
GSTP1	33		1		0.142857		0	0	2.82506	1	1		0.521823		1		0.425056		0.488372	0.256303	0.213424	0.748715	FALSE
H2AZ2	2		1		0.193255		0.535025		0.475299		1		0.140002		1		0.0439134		0.371247	0.334935	0.193655	0.69764	FALSE
H3-3B	9		1		0.0280302		1		0.00307182		1		0.0264126		1		0.000248695		0.962257	0.0352925	0.00245023	1.38778e-17	FALSE
HBB	4		1		0.0380621		1		2.27427		1		0.0537432		1		5.37684		0.172381	0.11049	0.0908643	0.34394	FALSE
HEBP2	2		0.861344		0.0881767		1		1.78683		1		0.0386982		1		0.151514		0.84004	0.108409	0.0445841	0.823389	FALSE
HEXA	3		1		0.0119978		1		0.00183898		1		0.0109493		1		0.000336261		0.945516	0.0482208	0.00626357	3.46945e-18	FALSE
HIGD1B	2		1		0.136602		0.52409		1.41584		1		0.35267		1		0.230914		0.665548	0.230935	0.0823568	0.702386	FALSE
HINT1	11		0.504444		0.308408		0	0.89121	2.82982	0.56	1		0.174343		1		0.191668		0.750971	0.225839	0.0168286	0.774803	FALSE
HINT2	6		1		0.132227		1		1.09828		1		0.0717665		1		3.03278e-17		0.894813	0.105187	1.92958e-32	1.15517	FALSE
HNRNPD	5		0.976362		0.279415		0.00695748	0.876538	2.54618	0.57	1		0.619451		1		0.285593		0.566332	0.166199	0.110913	1.77331	FALSE
HNRNPU	2		1		0.498058		1		0.230351		1		0.292859		1		0.244175		0.753325	0.193586	0.0530884	1.73521	FALSE
HRC	2		1		0.336222		1		0.0889373		1		0.327459		1		0.20677		0.616464	0.355771	0.0233859	5.55112e-17	FALSE
HSBP1	6		1		0.0249922		1		0.020406		1		1.90904e-17		1		2.40659e-19		1	1.82099e-30	8.22831e-62	1.04083e-17	FALSE
HSPB11	6		1		0.167369		1		1.32082		1		0.0534017		1		0.340263		0.606142	0.184135	0.125698	0.250056	FALSE
HSPD1	8		1		0.00794949		1		2.00593		1		0.0237595		1		0.0273456		0.942109	0.034806	0.00990337	0.0177706	FALSE
HSPE1-MOB4	16		1		0.076509		0.0748926	0.0253386	6.42886	0.99	1		1.08297		1		0.0861724		0.733738	0.180379	0.0450116	1.79876	FALSE
HSPH1	7		0.799234		0.190112		1		0.274891		0.000133286	0.0475362	0.466325	0.98	1		0.0209568		0.438515	0.337867	0.171932	0.776237	FALSE
HYI	2		1		0.110876		1		1.15677		1		0.156191		1		0.0667934		0.771508	0.155231	0.073261	0.722951	FALSE
HYPK	13		1		0.0942696		1		2.18503		1		0.00460546		1		0.00199873		0.978191	0.0150679	0.00466513	0.449647	FALSE
ICAM3	4		1		0.0792648		1		0.0794307		1		0.0141148		1		3.08127e-17		0.659424	0.340576	2.424e-32	1.66669	FALSE
ID2	9		0.256342		0.176388		1		1.37504		1		0.0360069		1		0.0228678		0.729609	0.166603	0.0937876	2.1049	FALSE
IFITM3	12		1		0.0117253		1		0.0663846		1		0.0294245		1		0.090661		0.422875	0.330438	0.246688	8.67362e-18	FALSE
IGFBP6	8		1		0.0570464		1		0.00603102		1		0.00560135		1		0.00817861		0.72115	0.117831	0.0373524	0.12614	FALSE
IGFBP7	23		1		0.0786556		0	0	3.0464	1	0	0	1.19245	1	1		0.16667		0.832444	0.142232	0.0102525	0.314657	FALSE
IGSF6	8		0.384564		0.0773797		1		2.24162		1		0.0110297		1		0.0397445		0.902047	0.0455102	0.0242369	0.560132	FALSE
IL1B	2		1		0.057705		1		0.017775		1		0.199926		1		0.0124525		0.42714	0.303431	0.191615	1.94017	FALSE
IL32	2		0.132875		0.140162		1		1.1261		1		0.694094		1		0.602369		0.409099	0.232115	0.180091	0.740361	FALSE
IL6ST	3		1		0.00458496		1		1.99117		1		0.00435293		1		0.0036229		0.988607	0.00578187	0.00433899	0.00281931	FALSE
ILF3	2		1		0.493036		1		0.416559		1		0.264216		1		0.010814		0.675244	0.313091	0.00952652	2.09599	FALSE
IQGAP2	5		0.275249		0.198988		0.0307928	0.118216	1.28803	0.95	0.0236786	0.322271	0.878973	0.85	0.0354679	0	0.30751	1	0.54828	0.210909	0.0796601	1.23	FALSE
IRF2	2		1		0.142928		1		1.54963		1		0.0576909		1		0.0194069		0.854339	0.124612	0.0210496	0.864857	FALSE
ITGA2B	2		1		0.280627		1		0.0831682		1		0.241182		1		0.192049		0.687384	0.22432	0.0844507	1.62437	FALSE
ITGA4	3		1		0.211142		1		0.10652		1		0.0173391		1		0.209771		0.699462	0.162328	0.095466	1.00142	FALSE
ITGB1BP1	3		0.351964		0.204894		3.22898e-09	0.140294	2.26441	0.94	1		0.0513997		0.614997		0.125569		0.803673	0.107172	0.0469494	2.45083	FALSE
JMJD1C	2		1		0.168345		0.552985		1.37829		1		0.409532		1		0.11841		0.436661	0.246376	0.0842541	0.970535	FALSE
KIF2A	2		0.806514		0.165895		0.297993		0.990799		0.496003		0.390378		0.43633		0.322291		0.667759	0.236309	0.0959319	1.16241	FALSE
KRT17	4		0.992897		0.0969614		1		0.144412		1		0.450514		1		1.73817		0.712373	0.187671	0.0968333	0.386888	FALSE
KRT7	2		1		0.117028		1		0.0019107		1		0.117222		1		0.0104788		0.974633	0.0239188	0.0014487	4.16334e-17	FALSE
KTN1	6		0.335553		0.306121		0.232936		1.36365		0.469854		0.559085		1		0.247451		0.322205	0.205886	0.133354	1.16662	FALSE
LAMTOR5	2		1		8.14485e-16		1		0.0215089		1		0.0510378		1		1.29015e-17		0.750923	0.249077	2.39504e-32	2.13438	FALSE
LARP7	2		1		0.32695		1		0.0757993		1		0.326721		1		0.0638247		0.743241	0.12075	0.061695	1.19696	FALSE
LCN2	4		1		0.00723684		1		0.0142789		1		0.0532897		1		0.0604106		0.953607	0.0443517	0.00204142	0.519514	FALSE
LCP1	2		1		0.139754		1		0.0489817		1		0.122318		1		0.000414699		0.60693	0.367785	0.0252848	5.55112e-17	FALSE
LDB2	2		0.389023		0.408931		1		0.0142364		1		0.262241		1		0.176922		0.439376	0.21273	0.11097	0.877388	FALSE
LGALS1	36		1		0.0659188		0	0	2.75005	1	0	0	1.6068	1	1		0.0383755		0.839963	0.124335	0.0261041	0.695374	FALSE
LMAN1	5		1		0.13606		1		0.540831		1		0.106799		1		2.37715e-17		0.775954	0.224046	2.12946e-32	0.187962	FALSE
LMAN2	2		1		0.00462996		1		0.00400966		1		1.27442e-18		1		3.01861e-19		1	8.20373e-32	9.76433e-36	1.73472e-18	FALSE
LOC101929592	2		1		0.131291		0.249445		1.29043		1		0.238717		1		0.00876425		0.830956	0.162514	0.00652925	0.0291316	FALSE
LPIN2	2		1		0.0191122		1		0.0353247		1		0.109957		1		3.6097e-17		0.696153	0.303847	1.35602e-32	4.18341	FALSE
LSM7	2		1		0.190972		1		0.263816		1		0.149279		1		5.83626e-19		0.603857	0.396143	1.17162e-32	2.72007	FALSE
MACROD1	5		1		0.243573		1		0.402537		1		0.0087435		1		0.45173		0.456163	0.218965	0.13445	5.86454	FALSE
MACROH2A1	2		1		0.0755002		1.1769e-06	0.0253386	1.56396	0.99	0.000435305	0	1.00979	1	1		0.230736		0.447928	0.318979	0.119572	1.04247	FALSE
MALAT1	5		0.565339		0.273067		1		1.81283		0.0164939	0.0244776	0.442186	0.99	1		0.0866619		0.446737	0.127477	0.0396402	0.904737	FALSE
MARCO	6		0.251595		0.168799		1.07091e-05	0	2.41012	1	0.000680492	0	1.58563	1	0.81225		0.175379		0.551816	0.267861	0.0758576	0.677487	FALSE
MCUB	3		0.534369		0.267425		1		1.03948		1		0.170765		1		0.012337		0.814826	0.125324	0.0385701	1.29026	FALSE
MCUR1	3		1		0.293911		1		0.00820599		1		0.112372		1		0.334369		0.655989	0.186208	0.0721665	2.07636	FALSE
METTL26	5		1		0.27264		0.0781991	0.823301	1.16577	0.6	1		0.152268		1		0.187912		0.4316	0.231184	0.172615	1.07687	FALSE
METTL5	11		0.98963		0.233789		1		1.48105		1		0.0630519		1		0.1487		0.491153	0.206	0.143413	0.862679	FALSE
MFSD1	2		1		0.0235631		1		0.181221		1		0.0977198		1		0.158086		0.448352	0.340594	0.211054	0.0731913	FALSE
MGP	10		1		0.0935448		1		2.53862		1		0.0385072		1		0.03353		0.846199	0.0762544	0.0686311	1.43068	FALSE
MGST2	10		1		0.267054		1		0.972979		5.39173e-05	0	0.528906	1	0.151583	0.0464935	0.660324	0.98	0.574639	0.257319	0.105878	1.57518	FALSE
MIR3945HG	2		1		0.0787218		1		1.41325		1		0.123285		1		0.212694		0.836056	0.0862854	0.0619544	0	FALSE
MKNK2	3		1		0.128792		1		0.587583		1		1.43042		1		0.107543		0.459214	0.404952	0.113448	1.16169	FALSE
MNDA	5		1		0.161447		1		1.02532		1		1.4788		1		0.208746		0.782088	0.130441	0.0522603	0.342745	FALSE
MPND	2		1		0.390569		1		0.396387		1		0.140183		1		3.51686e-17		0.925084	0.074916	1.95153e-32	3.48115	FALSE
MRPL21	5		1		0.0705655		1		0.000760974		1		0.110268		1		0.0685171		0.542757	0.283171	0.174072	1.02245	FALSE
MRPL47	3		1		0.200745		1		0.0121108		1		0.0903161		1		0.206686		0.439268	0.271506	0.203782	2.54161	FALSE
MRPL52	13		1		0.237067		0.00658903	0.406869	2.45338	0.81	0.00911332	0.7585	1.0168	0.63	1		0.277334		0.643559	0.213178	0.0530058	0.764095	FALSE
MRPS21	2		1		0.159189		1		0.161012		1		0.0996297		1		5.71292e-18		0.884251	0.115749	1.44728e-32	0.0677043	FALSE
MS4A4A	4		1		0.365374		1		0.899992		1		1.38054		1		0.285119		0.679931	0.229342	0.0636958	0.293867	FALSE
MS4A6A	7		1		0.15185		1		0.00437862		1		0.0391494		1		0.184272		0.639569	0.259133	0.060528	0.797655	FALSE
MSLN	3		1		0.0404226		1		0.0330049		1		1.9663e-18		1		1.25466e-18		1	2.97564e-33	4.92462e-65	0.313659	FALSE
MSMB	2		1		0.0332167		1		2.14945		1		0.0684329		1		0.0103574		0.98782	0.0107293	0.00145052	0.0239755	FALSE
MSN	9		1		0.176132		1		0.0244455		1		0.174347		1		0.000242125		0.470838	0.41682	0.10891	3.7904	FALSE
MSRB2	2		1		0.0635001		1		0.0518476		1		1.66981e-17		1		6.02698e-18		1	1.32435e-31	9.32658e-63	1.38778e-17	FALSE
MT1A	3		1		0.108148		1		0.0967302		1		1.12894e-17		1		3.32463e-17		1	3.4781e-32	7.10844e-65	1.03942	FALSE
MT1E	10		0.7931		0.37149		0.795618		0.373508		1		0.00603166		1		7.16529e-18		0.953923	0.0460767	2.74236e-32	1.30044	FALSE
MT1F	2		1		0.249293		1		0.215894		1		6.50279e-17		1		2.49463e-17		1	2.31986e-33	2.25519e-34	0.53258	FALSE
MT1X	14		0.348301		0.219924		1		1.41958		1		0.0114283		1		0.0900284		0.732433	0.221219	0.0463485	1.02977	FALSE
MT2A	32		1		0.0100845		1		2.08004		1		0.000604245		1		0.000871895		0.991465	0.00560894	0.00215291	0.0307184	FALSE
MTCH2	2		0.164128		0.499692		0.0373319	0	0.506756	1	0.424775		0.105241		0.166177	0	0.121813	1	0.848918	0.113897	0.0371846	2.29808	FALSE
MTDH	13		1		0.266715		0.0183112	0.0498824	2.04487	0.98	0.556261		0.26314		2.78266e-06	0	0.441357	1	0.571728	0.18002	0.0877956	0.899768	FALSE
MTUS1	4		0.719326		0.271112		1		0.951595		1		1.08628		1		0.163198		0.638695	0.175449	0.14303	0.552865	FALSE
MVP	2		1		0.0492068		1		0.0401772		1		3.15768e-18		1		1.10634e-18		1	1.02857e-34	4.84541e-35	1.38778e-17	FALSE
MYL2	2		1		0.00565437		1		0.000205596		1		0.000120395		1		0.000101083		0.241615	0.178908	0.150381	0.829678	FALSE
MYLPF	2		1		0.00125644		1		0.00463173		1		0.00941475		1		1.48925e-18		0.755162	0.244838	2.12446e-33	0	FALSE
MYO1G	2		0.698434		0.260703		1		1.76626		1		0.618484		1		0.00216504		0.754416	0.235263	0.00734489	0.28243	FALSE
MZT2A	2		1		0.371347		1		1.91789		1		0.00680108		1		0.141816		0.770001	0.124005	0.0846123	3.10998	FALSE
NAA38	5		0.917682		0.260873		0.0305836	0.650693	1.52008	0.69	1		0.19787		1		0.380998		0.786975	0.147626	0.065399	0.591144	FALSE
NAAA	2		0.608779		0.262501		1		0.358403		0.371531		0.327711		0.498688		0.251064		0.476763	0.277946	0.130711	0.298833	FALSE
NACA	57		0.431523		0.180843		0.028888	0	12.8541	1	1		0.107744		1		0.271972		0.733883	0.207509	0.0175539	0.36723	FALSE
NANS	2		1		0.0312806		1		0.0259815		1		0.00393451		1		0.0121726		0.971838	0.0186875	0.00947414	6.93889e-18	FALSE
NAPSA	2		1		0.136385		1		0.126225		1		0.0174907		1		0.00609905		0.759834	0.166066	0.074099	0	FALSE
NASP	13		1		0.174256		4.45435e-13	0	2.64739	1	3.78466e-08	0	0.798769	1	0.396646		0.577458		0.606273	0.0953797	0.0833406	0.48338	FALSE
NDFIP1	6		1		0.118292		1		1.53124		1		0.675908		1		0.130644		0.553799	0.28543	0.0763044	5.53326	FALSE
NDUFA12	5		1		0.314166		1		0.903432		1		0.0620992		1		0.0352418		0.950651	0.0414134	0.00793524	1.26149	FALSE
NDUFA13	38		1		0.109193		0.0203022	0	2.96196	1	6.10572e-11	0.0475362	1.77719	0.98	1		0.0866412		0.7387	0.196878	0.0385972	0.274596	FALSE
NDUFA7	2		1		0.0033567		9.53356e-15	0	2.82999	1	0.00171781	0	0.380671	1	0.870705		0.133403		0.986012	0.00821544	0.00561558	0.00045683	FALSE
NDUFAF3	9		1		0.423859		1		0.34608		1		1.45457e-16		1		1.40649e-17		1	1.63858e-31	1.52332e-61	1.62349	FALSE
NDUFB10	20		1		0.0409874		1		2.02061		1		0.000653579		1		0.052309		0.951671	0.0232667	0.0169834	0.326265	FALSE
NDUFB4	6		1		0.00242672		1		0.0253011		1		0.0159562		1		0.112298		0.686804	0.187196	0.126	0.659032	FALSE
NDUFB6	10		1		0.327093		1		0.366946		1		0.275972		1		0.0551268		0.615516	0.294814	0.0732676	1.43441	FALSE
NDUFC2	12		1		0.0558532		1		0.045604		1		3.12113e-17		1		1.53182e-17		1	3.12103e-31	3.21337e-34	1.38778e-17	FALSE
NDUFS2	2		1		0.131218		1		0.0281649		1		0.116427		1		1.4384e-17		0.979346	0.0206543	4.92795e-33	1.56616	FALSE
NDUFS3	2		1		0.0934714		1		0.0933974		1		0.0179201		1		1.592e-17		0.999751	0.000248885	6.15134e-33	2.77556e-17	FALSE
NDUFS5	21		1		0.0668864		1		0.0226526		1		0.672472		1		0.0335072		0.850964	0.142203	0.0043793	0.372686	FALSE
NDUFS6	18		0.204638		0.196662		0	0.0253386	2.10871	0.99	0	0	0.695089	1	1		0.0945806		0.779384	0.145295	0.0720054	0.867821	FALSE
NDUFS7	12		1		0.0177499		1		0.0144928		1		7.8946e-17		1		1.43561e-18		1	2.90735e-29	6.8254e-36	3.46945e-18	FALSE
NEB	2		1		0.149135		0.0545816	0.0956391	2.33847	0.96	1		0.0573281		1		0.14909		0.872445	0.051655	0.0250865	1.406	FALSE
NFIC	2		0.299603		0.165179		0.00670656	0.118216	0.352908	0.95	1		0.547774		0.238178	0.155652	0.572797	0.93	0.414501	0.384573	0.190081	1.30783	FALSE
NKG7	12		1		0.278721		0.256239		0.434015		0.00131911	0	0.771691	1	1		0.0831614		0.725587	0.248363	0.0200405	2.22511	FALSE
NPC2	12		1		0.070507		1		0.0225769		1		0.0517024		1		0.0475621		0.90637	0.0580085	0.0356211	0.143282	FALSE
NSA2	4		0.182469		0.449069		0	0	2.12651	1	1		0.140401		0.123251	0	0.272562	1	0.864941	0.0986044	0.0278738	2.04431	FALSE
NSRP1	2		0.674966		0.17093		1		1.62854		0.00123616	0.0475362	1.16324	0.98	1		0.357899		0.429095	0.341811	0.124943	1.04107	FALSE
NUDT22	2		1		0.479081		1		0.0980254		1		0.531163		1		0.121676		0.700471	0.251279	0.0422781	2.80168	FALSE
NUDT5	2		1		0.165712		1		0.0183943		1		0.13622		1		0.115706		0.48303	0.383886	0.130605	2.77556e-17	FALSE
NUPR1	7		1		0.305971		1		0.0145963		1		0.0244747		1		0.113643		0.977575	0.00710666	0.00550238	0.97071	FALSE
ODF3B	2		1		0.0396383		1		0.0328625		1		0.142993		1		4.24153e-17		0.731003	0.268997	8.97133e-33	1.20221	FALSE
OLR1	2		0.675512		0.413829		1		0.0496099		1		0.110648		1		0.391295		0.406931	0.334084	0.147093	1.14866	FALSE
OSBPL1A	3		1		0.438522		1		0.14796		1		0.476172		1		0.0207567		0.549495	0.152785	0.109939	1.07177	FALSE
OSBPL8	5		0.175224		0.379896		0.0579268	0.0956391	0.945089	0.96	0.400704		0.574249		0.591796		0.3281		0.38895	0.179007	0.15818	2.17612	FALSE
OST4	30		1		0.0220566		1		0.0415977		1		0.0187778		1		3.0535e-16		0.801982	0.198018	2.33335e-29	0.0398898	FALSE
PALMD	2		1		0.0936586		1		0.0764719		1		1.69728e-17		1		9.90656e-18		1	2.21388e-33	2.6704e-65	0.769338	FALSE
PAPOLA	2		1		0.0957165		1		0.00749092		1		0.01394		1		0.088652		0.550556	0.361711	0.0671825	1.09627	FALSE
PCED1B-AS1	2		0.918571		0.0843106		0.230067		0.495587		1		0.128272		1		0.230986		0.261525	0.170533	0.137797	0.292628	FALSE
PDCD5	21		1		0.155937		0.00106283	0.243763	1.53834	0.89	3.85906e-09	0.134795	1.28677	0.94	0	0.844719	0.750016	0.58	0.446332	0.322196	0.10726	0.894317	FALSE
PDXK	6		0.146486		0.136056		1		1.34996		1		0.0472032		1		0.0355583		0.758143	0.201004	0.0323983	0.550152	FALSE
PET100	2		0.275595		0.248618		1		1.70986		1		0.192922		1		0.118187		0.68931	0.203172	0.096747	2.00221	FALSE
PF4	2		1		0.00343742		1		2.25128		1		0.058485		1		0.00418452		0.990008	0.00818956	0.00142562	0.0100308	FALSE
PFDN2	3		1		0.145985		1		0.0970573		1		0.0810153		1		2.05816e-17		0.929648	0.0703517	2.11017e-32	2.42554	FALSE
PFN1	12		0.985984		0.162505		0	0.201549	4.16192	0.91	1		0.057448		1		0.0665758		0.872057	0.107933	0.0163539	0.667555	FALSE
PGAM2	2		1		0.327183		1		0.338929		1		0.00201529		1		2.20196e-17		0.964293	0.0357066	1.57018e-32	0	FALSE
PHPT1	9		1		0.152856		0	0	2.13824	1	1		0.194069		3.6956e-06	0	0.276522	1	0.902856	0.0800518	0.0170922	0.793336	FALSE
PILRA	5		1		0.423633		1		0.11618		1		0.488574		1		0.162582		0.876718	0.0493525	0.026438	1.53702	FALSE
PKN1	2		1		0.0769231		1		0.0628074		1		1.67053e-17		1		1.05595e-17		1	4.6263e-32	2.34524e-33	1.38778e-17	FALSE
PLA2G2A	3		1		0.0467757		1		2.65672		1		1.75278		1		0.494682		0.563171	0.243443	0.09646	0.544899	FALSE
PLA2G7	2		1		0.177981		1		1.40395		1		0.103258		1		0.0393174		0.765023	0.119943	0.0837199	0	FALSE
PLAC8	9		0.163187		0.250989		1		1.67287		1		0.0943287		1		0.565854		0.637792	0.234731	0.111871	1.31795	FALSE
PLAC9	7		1		0.114869		1		1.92213		1		0.0428078		1		0.00398606		0.952304	0.0413991	0.00629665	0.326883	FALSE
PLEKHA5	2		1		0.142738		1		0.418966		1		0.0460883		1		0.207098		0.488361	0.381069	0.0765142	1.84355	FALSE
PLPP3	4		0.21097		0.185662		0	0.367755	2.71386	0.83	0.39757		0.119258		1		0.0298612		0.953108	0.0229802	0.0109748	0.431798	FALSE
PLTP	4		1		0.0773052		1		0.00141235		1		0.00560989		1		0.0131864		0.679708	0.161812	0.0863117	0.531054	FALSE
PMP22	2		1		0.103167		1		0.02599		1		0.129394		1		0.0160522		0.735098	0.246791	0.0181104	1.38778e-17	FALSE
PNISR	10		1		0.0697311		1		0.0800986		1		0.0902177		1		0.102016		0.451111	0.29107	0.0678328	2.43204	FALSE
PNN	3		1		0.0563491		1		0.0916114		1		0.0214584		1		1.72487e-17		0.717044	0.282956	1.72308e-32	0.0640796	FALSE
POLR2F	5		1		0.011846		0	0	2.84814	1	0	0.0244776	0.532013	0.99	0.00656097	0	0.203068	1	0.944664	0.0359714	0.0142955	0.542274	FALSE
POLR2G	2		1		0.0637577		1		0.0520579		1		2.53859e-17		1		5.83369e-18		1	1.61094e-31	5.40929e-35	1.38778e-17	FALSE
POMP	27		0.691625		0.0941559		1		1.66958		1		0.186174		1		0.0238092		0.566936	0.395694	0.0235783	0.208011	FALSE
PPA2	4		1		0.24372		1		1.19773		1		0.524873		1		0.0193649		0.607022	0.331008	0.0464075	3.18332	FALSE
PPBP	2		1		0.0495682		1		0.0404722		1		2.3456e-17		1		1.77919e-18		1	1.25927e-31	2.69095e-63	6.93889e-18	FALSE
PPFIBP1	5		1		0.307554		9.06277e-06	0.570498	2.43983	0.73	1		0.296295		1		0.101955		0.811685	0.110646	0.0225323	1.54402	FALSE
PPIB	9		1		0.0209957		1		0.0191655		1		0.00018684		1		5.84226e-17		0.956488	0.043512	9.59399e-30	6.93889e-18	FALSE
PPIG	6		0.189783		0.233854		1.68714e-05	0.448188	1.49797	0.79	1		0.0519684		1		0.0779813		0.434705	0.295746	0.178783	0.834941	FALSE
PPP1R1A	2		1		0.142672		1		1.41746		1		1.56423		1		0.242483		0.576269	0.318504	0.0827804	0.140628	FALSE
PQBP1	3		1		0.421265		1		0.39983		1		0.822486		1		0.109755		0.616958	0.284037	0.0848012	0.774524	FALSE
PRAM1	3		1		0.0985011		1		0.00838138		1		0.00633714		1		0.0457667		0.528709	0.42649	0.0170596	0.47464	FALSE
PRDX2	2		0.68538		0.133898		0.534197		0.144363		1		0.0263312		1		1.45137e-17		0.992828	0.00717212	3.15177e-33	0.0952933	FALSE
PRDX4	16		1		0.0623129		0.00029561	0.0253386	2.30725	0.99	1		0.323001		0	0	0.604727	1	0.75579	0.16067	0.0602855	3.92567	FALSE
PRDX6	2		1		0.0581042		1		0.0474419		1		2.05871e-17		1		6.65388e-19		1	1.91693e-32	2.76396e-63	2.15857	FALSE
PRKAR2B	2		1		0.0936586		1		0.0764719		1		1.22493e-17		1		2.56253e-18		1	3.52316e-33	6.46219e-65	2.77556e-17	FALSE
PRRC2C	10		1		0.244505		1		0.809764		1		0.307221		1		0.276084		0.30953	0.221108	0.191891	0.839394	FALSE
PSIP1	2		1		0.199309		1		0.016901		1		0.162359		1		0.127338		0.801871	0.185686	0.0124428	5.55655	FALSE
PSMA3	24		0.153646		0.32832		1		0.866327		1		1.3545		1		0.0684692		0.582839	0.255595	0.101045	1.20577	FALSE
PSMA4	2		1		0.189304		1		0.189379		1		0.00309123		1		2.8816e-17		0.996733	0.00326734	4.35574e-33	1.79613	FALSE
PSMA7	41		0.411428		0.100696		0	0	2.61117	1	1		0.465674		0	0	0.516988	1	0.927029	0.0348229	0.0262123	0.379262	FALSE
PSMB10	10		1		0.065606		1		0.0752747		1		0.00698317		1		1.81373e-19		0.791407	0.208593	5.40428e-32	2.77556e-17	FALSE
PSMB2	5		1		0.135705		1		0.0263296		1		0.0587596		1		0.201597		0.577425	0.41465	0.00694146	0.53568	FALSE
PSMB6	12		1		0.0359775		1		0.0293755		1		3.80425e-17		1		1.93331e-18		1	1.70176e-30	5.2847e-61	2.08167e-17	FALSE
PSMB7	4		1		0.0595491		1		0.0508327		1		0.00869574		1		4.16594e-18		0.966731	0.0332693	1.92128e-32	1.38778e-17	FALSE
PSMC3	11		1		0.131876		1		0.187184		0	0	1.35941	1	1.39726e-14	0	0.347841	1	0.519292	0.310041	0.101103	1.18994	FALSE
PSMD8	11		0.524291		0.116063		1		2.01472		1		0.0401572		1		0.0434614		0.931772	0.03192	0.028218	0.679248	FALSE
PSME1	26		1		0.13781		5.80367e-09	0	1.89275	1	1		0.274421		1		0.0301582		0.559138	0.19864	0.127658	1.38564	FALSE
PTMS	2		0.898355		0.133876		1		1.57689		1		0.204412		1		0.0476342		0.788812	0.197763	0.0134259	0.206561	FALSE
PTOV1	2		0.858944		0.102129		0.189632		1.30771		1		0.0661736		1		2.15359e-16		0.811274	0.188726	3.8808e-33	1.64192	FALSE
PTP4A2	4		1		0.276064		1		0.0872954		1		0.320668		1		0.451382		0.497231	0.182623	0.146005	0.959736	FALSE
QARS1	4		1		0.186605		1		0.186506		1		0.00977392		1		4.75239e-17		0.949373	0.0506268	6.16831e-32	5.55112e-17	FALSE
RAB11A	3		1		0.0958533		1		0.905754		1		0.303319		1		0.0441097		0.667397	0.320198	0.0124051	0.155113	FALSE
RAB2A	14		0.375944		0.188643		0	0	2.38202	1	0.404652		0.447178		1		0.0474391		0.843822	0.0621668	0.0371843	0.810987	FALSE
RABAC1	17		0.565339		0.287266		1		1.48768		1		0.0446982		1		0.111355		0.692584	0.121471	0.0783176	1.64275	FALSE
RAC1	25		1		0.0501744		1		0.0457793		1		0.00146645		1		5.61654e-17		0.964755	0.0352454	2.10285e-30	2.08167e-17	FALSE
RAD23A	4		0.182469		0.22507		1		1.47949		1		0.0154594		1		0.0159878		0.905264	0.0788014	0.0159343	1.56394	FALSE
RBIS	10		1		0.362384		1		0.148187		1		0.357892		1		0.0710146		0.669932	0.319039	0.0110288	2.19449	FALSE
RBM25	2		1		0.277109		1		0.286011		1		0.252947		1		0.0930313		0.670422	0.207789	0.0629629	6.59796	FALSE
RBM8A	15		1		0.172189		1		0.166707		1		0.046596		1		0.0014854		0.872777	0.108443	0.0187796	1.63675	FALSE
RBP1	4		1		0.0596537		1		1.95627		1		0.00451644		1		0.0455924		0.95408	0.0274404	0.017107	0.0458466	FALSE
RBPMS	2		1		0.151842		0.385788		2.06432		0.671254		0.282237		0.125818	0.218293	0.338276	0.9	0.587482	0.123452	0.0836715	0.789592	FALSE
RDX	3		0.971613		0.307216		1		1.37199		1		0.479794		1		0.110216		0.590351	0.285731	0.0588852	0.806932	FALSE
REEP3	2		1		0.0983971		0.00468077	0.0733846	2.09631	0.97	1		0.0492251		0.000145922	0	0.476031	1	0.900414	0.0492064	0.0399012	0.612213	FALSE
RER1	5		1		0.0696733		1		0.0635991		1		0.000681043		1		2.59819e-17		0.957939	0.0420609	2.05752e-31	1.38778e-17	FALSE
REXO2	3		0.352935		0.176996		1		1.29181		1		0.0875775		1		0.16153		0.401703	0.270365	0.135103	1.79132	FALSE
RGS16	6		1		0.0850874		1		0.0306997		1		0.02323		1		0.0155564		0.686315	0.291403	0.0198255	0.177453	FALSE
RHOBTB3	2		1		0.165508		1		0.146434		1		0.145253		1		0.0316641		0.937439	0.059455	0.00310612	0	FALSE
RNASET2	14		1		0.387041		1		0.105261		1		0.0722724		1		0.201493		0.508342	0.259021	0.106473	2.91416	FALSE
RNF130	10		1		0.136652		1		1.64957		1		0.328632		1		0.298625		0.568669	0.205115	0.18289	0.142152	FALSE
ROMO1	4		1		0.115654		1		0.101058		1		0.0807072		1		6.04394e-17		0.626334	0.373666	1.0633e-31	1.58329	FALSE
RPL10A	56		1		0.0364716		0	0	6.2052	1	1		1.62619		0	0	1.13769	1	0.64738	0.298037	0.0330771	0.453036	FALSE
RPL15	33		1		0.0255436		1		0.00144488		1		0.00129414		1		0.00152635		0.786641	0.120487	0.0662061	0.018	FALSE
RPL22	13		1		0.0355719		1		0.00635919		1		0.00870844		1		0.00119863		0.713963	0.277614	0.00766769	0.326748	FALSE
RPL26	3		1		0.112997		1		0.00704282		1		0.0103558		1		0.00385427		0.894012	0.069961	0.0162752	1.20921	FALSE
RPL37A	58		1		0.0218035		1		2.36757		1		0.0283168		1		0.0180331		0.973695	0.0150155	0.00367024	0.0256833	FALSE
RPL41	34		1		0.164676		1		2.00406		1		0.0120481		1		0.00943944		0.940777	0.0399661	0.0117582	0.551927	FALSE
RPL4	23		1		0.092221		1		0.00452753		1		0.00482421		1		0.00400305		0.68688	0.217669	0.0539134	3.32728	FALSE
RPL5	55		1		0.393711		1		0.184438		1		0.373834		1		0.12424		0.317853	0.230902	0.110542	0.720151	FALSE
RPL7	15		1		0.00965879		1		0.00532921		1		0.00644738		1		3.73785e-16		0.999876	0.000124334	6.68201e-29	0.0307288	FALSE
RPL9	61		1		0.00928228		1		0.00583496		1		0.00403276		1		0.00455247		0.627312	0.125131	0.0937603	0.0158428	FALSE
RPLP0	19		1		0.47859		1		0.530617		0.770064		0.165881		1		0.00400013		0.788882	0.185	0.0261183	0.793647	FALSE
RPS15	56		1		0.00672544		0	0	3.53467	1	0	0	0.071373	1	0	0	0.479665	1	0.959606	0.0306256	0.00687062	0.00551021	FALSE
RPS25	37		1		0.0852708		1		0.0854966		1		0.0912535		1		0.0192089		0.808683	0.169123	0.022194	2.77556e-17	FALSE
RPS26	40		1		0.00021699		1		0.00147507		1		0.00253225		1		0.00452425		0.981726	0.0133408	0.00493305	6.23416e-19	FALSE
RPS27L	26		0.141955		0.404338		1		0.220436		1		1.1338		1		0.0146429		0.881627	0.113792	0.00370914	2.37478	FALSE
RPS29	38		1		0.023271		1		0.0011249		1		0.014124		1		0.0194117		0.9826	0.0154292	0.00197117	7.65481	FALSE
RPS3A	56		1		0.0197286		1		0.00353762		1		0.00368736		1		0.000891411		0.364127	0.299651	0.203184	3.46945e-18	FALSE
RRBP1	3		1		0.11701		1		0.581224		1		0.485346		1		0.0558084		0.785072	0.172894	0.0420342	2.45298	FALSE
RSL1D1	5		1		0.0494091		1		0.0427896		1		1.73088e-17		1		6.62025e-19		1	2.24228e-31	1.48356e-35	1.38778e-17	FALSE
RSRC2	4		0.267572		0.275872		0.995759		1.76726		1		0.208759		0.919772		0.395155		0.509042	0.111553	0.108178	1.17046	FALSE
RTN4	3		1		0.263235		1		0.277541		1		0.126465		1		0.00370865		0.751966	0.241476	0.00655729	0.118394	FALSE
S100A10	5		1		0.0473394		1		0.00232819		1		4.79648e-05		1		0.00423571		0.626092	0.174706	0.158677	1.07337	FALSE
S100A11	27		1		0.00342519		1		0.000157003		1		0.000381103		1		0.00033789		0.558317	0.440624	0.000749704	8.67362e-19	FALSE
S100A12	3		1		0.0174851		1		0.0164563		1		0.00868998		1		3.42479e-17		0.682322	0.317678	7.21681e-30	0.00759873	FALSE
S100A2	2		0.172753		0.203844		0.359895		1.33907		1		0.375829		1		0.160047		0.717015	0.265835	0.0112504	0.15313	FALSE
S100A4	32		1		0.0622606		1		0.0399019		0.479534		0.615146		1		0.0783768		0.916273	0.0423515	0.0136488	1.50361	FALSE
S100P	3		1		0.0198811		1		0.0162328		1		5.69694e-17		1		1.60886e-18		1	3.94625e-30	7.39451e-35	3.46945e-18	FALSE
SCGB3A2	5		1		0.0342911		1		0.0314315		1		0.0156299		1		9.53616e-18		0.965303	0.0346974	3.6893e-31	0.435858	FALSE
SDHB	2		1		0.0446767		1		0.0327685		1		0.0205725		1		1.17252e-16		0.995971	0.00402905	4.58738e-31	0.0688351	FALSE
SEC61B	18		1		0.0617284		1		0.0534583		1		1.16727e-16		1		6.20983e-19		1	4.15266e-30	2.35241e-34	1.38778e-17	FALSE
SEC62	19		1		0.257275		1		0.0168336		1		0.00525482		1		0.000441496		0.489346	0.254537	0.166449	1.13002	FALSE
SEM1	18		1		0.0450206		1		0.891403		1		1.29807		1		0.0425667		0.489459	0.455543	0.0295568	0.216732	FALSE
SERF2-C15ORF63	27		0.442998		0.248812		0.0144397	0.264083	2.37351	0.88	1		0.054627		1		0.0303021		0.903911	0.0356997	0.0314461	0.927704	FALSE
SERP1	18		1		0.183946		1		1.55282		1		0.00956351		1		0.00181652		0.911302	0.0855738	0.00312398	1.50765	FALSE
SERPINF1	2		1		0.0327385		1		0.0232097		1		0.0188278		1		3.90784e-18		0.599404	0.400596	1.32628e-31	0	FALSE
SF3B2	7		1		0.266371		1		0.217491		1		2.61027e-16		1		2.61079e-17		1	1.19004e-30	1.35624e-60	1.00513	FALSE
SF3B6	3		1		0.160102		1		0.0385197		1		0.135495		1		0.0763523		0.790878	0.19939	0.00973108	5.84679	FALSE
SFTA1P	2		1		0.0869253		1		1.35049		1		0.250516		1		0.0359395		0.47543	0.313636	0.0925433	0.0918494	FALSE
SFTPA1	2		1		0.0254864		1		1.09654		0.626573		0.541051		1		0.0407224		0.0763456	0.0619256	0.031515	0.854371	FALSE
SFTPB	3		1		0.191147		1		1.03749		1		1.2899		1		0.23871		0.487189	0.20185	0.0599016	0.213794	FALSE
SGCA	2		1		0.374524		1		0.054953		1		0.307779		1		0.209679		0.503196	0.392891	0.103913	0.319554	FALSE
SGCE	2		1		0.144156		1		1.43706		1		0.126308		1		0.0225052		0.775628	0.138861	0.0751336	0.28503	FALSE
SIVA1	7		1		0.13456		1		0.0331161		1		0.107275		1		0.0744116		0.924797	0.0591256	0.016077	1.53444	FALSE
SKAP1	2		1		0.391677		1		0.756264		1		0.374955		1		0.0981975		0.38026	0.25728	0.114715	0.734439	FALSE
SKP1	8		1		0.0200767		1		0.00314827		1		0.0161991		1		0.00855387		0.929466	0.0664233	0.00411113	6.93889e-18	FALSE
SLC25A3	6		1		0.0520536		1		0.00970382		1		0.0465168		1		3.60844e-17		0.995167	0.00483321	2.96612e-33	0.637604	FALSE
SLPI	12		1		0.00999116		1		2.53319		1		0.0351583		1		0.0192952		0.977109	0.0116147	0.00861896	0.539759	FALSE
SLTM	3		1		0.0150401		0.0395515	0.858907	2.73957	0.42	0.499537		0.276876		1		0.11752		0.684985	0.0942124	0.0565382	1.1327	FALSE
SMAP1	3		1		0.0885456		1		1.79672		1		0.0835229		1		0.0940446		0.714576	0.214935	0.0478626	0.961448	FALSE
SMCHD1	2		1		0.0961694		1		1.87011		1		0.0147039		1		0.0207319		0.50156	0.120186	0.0946454	2.82681	FALSE
SNCG	8		1		0.191419		1		0.273667		1		0.320335		1		0.971684		0.573815	0.32145	0.0873143	0.131605	FALSE
SNF8	7		1		0.333922		1		0.0950187		1		0.000553581		1		0.0902392		0.619037	0.298984	0.0354238	1.0813	FALSE
SNRPD1	4		1		0.107833		1		0.0880451		1		6.01786e-17		1		5.29385e-18		1	3.00451e-31	5.03409e-63	1.34021	FALSE
SNRPD3	4		0.976362		0.482481		0.7146		0.494327		0.470674		0.110947		1		5.22161e-17		0.92156	0.0784396	9.8367e-33	2.75387	FALSE
SNRPF	6		1		0.000326352		1		0.0204999		1		0.0341461		1		1.57747e-17		0.724048	0.275952	1.89628e-31	0.0343946	FALSE
SNTB2	2		1		0.0187733		1		0.14007		1		0.109199		1		0.200194		0.798155	0.166431	0.0354145	2.4237	FALSE
SNW1	3		1		0.364321		1		0.0878244		1		0.25793		1		0.306557		0.646453	0.321393	0.0321535	1.99655	FALSE
SNX10	3		0.194728		0.108424		0.00412883	0	1.62823	1	1		0.712345		0	0	0.663107	1	0.522466	0.352891	0.0755951	0.857528	FALSE
SNX2	2		1		0.180964		1		0.178245		1		0.0341714		1		4.70409e-17		0.993735	0.00626533	3.6229e-32	0.0334092	FALSE
SNX9	2		1		0.0620174		1		0.050637		1		2.49117e-17		1		2.47291e-18		1	9.1945e-32	2.27569e-62	2.77556e-17	FALSE
SOD2	17		0.383344		0.200959		0	0	2.30019	1	1		1.45086		0	0	0.928345	1	0.524443	0.26253	0.108097	0.415619	FALSE
SP100	6		1		0.320469		1		1.51362		0.00220247	0.504615	0.939497	0.76	1		0.392533		0.524403	0.175369	0.104965	1.22679	FALSE
SPARCL1	9		1		0.146719		6.18778e-08	0	2.07612	1	1		0.495116		0	0	0.89888	1	0.543373	0.200005	0.126746	1.04427	FALSE
SPCS2	2		1		0.0547832		1		0.0209619		1		0.046185		1		4.16439e-18		0.677876	0.322124	7.41779e-32	0.795592	FALSE
SPRY1	4		1		0.0414665		1		0.00854565		1		0.0368764		1		1.16969e-17		0.98705	0.0129495	1.93876e-32	2.08167e-17	FALSE
SPTBN1	2		1		0.0870388		1		0.0772648		1		0.0185279		1		1.53403e-17		0.664329	0.335671	2.04395e-32	0.160202	FALSE
SRI	11		0.932886		0.145686		0	0	2.34293	1	0	0.0244776	0.756345	0.99	0.279601		0.103661		0.666629	0.120474	0.103802	2.53641	FALSE
SSBP1	3		1		0.0575772		1		0.0573262		1		0.00700966		1		6.5527e-18		0.970772	0.0292284	3.20864e-32	1.38778e-17	FALSE
SSR3	4		1		0.0802302		1		0.741396		1		1.32803		1		0.00616154		0.647667	0.296838	0.0267493	1.0557	FALSE
STAB1	2		1		0.629153		1		0.513701		1		2.20174e-16		1		3.54712e-17		1	3.25239e-32	2.66694e-64	0	FALSE
STIMATE-MUSTN1	2		1		0.344691		1		0.281439		1		5.01419e-17		1		3.76871e-17		1	2.30494e-33	2.18815e-35	1.62292	FALSE
SUB1	9		1		0.140495		1		1.75343		1		0.128016		1		0.000391835		0.721395	0.179512	0.0620463	0.577168	FALSE
SUDS3	2		1		0.0212059		1		2.20695		1		0.0251463		1		0.00573835		0.955603	0.0268413	0.00962486	1.17019	FALSE
SUGT1	4		1		0.27457		1		1.66623		1		0.133955		1		0.858653		0.523121	0.233528	0.16285	1.1436	FALSE
TACC1	5		0.565339		0.200902		0.000308911	0.46796	1.98219	0.78	0.00112966	0.0475362	0.697801	0.98	1		0.234795		0.563738	0.187658	0.080514	1.95879	FALSE
TAOK3	2		1		0.15407		1		0.0101408		1		0.0140038		1		0.156487		0.474193	0.369218	0.106153	0.0490487	FALSE
TAX1BP1	5		0.190263		0.368686		2.19238e-11	0.161891	2.0121	0.93	0.0366877	0.155837	0.416723	0.93	1		0.174313		0.529086	0.296892	0.0805343	1.01547	FALSE
TBCA	13		0.502186		0.272048		1		1.41391		1		0.885971		1		0.00256832		0.723506	0.263903	0.00856716	0.731257	FALSE
TBCB	3		1		0.12356		1		0.100887		1		4.01297e-18		1		7.07455e-18		1	4.06498e-33	8.48528e-35	2.05419	FALSE
TBXAS1	2		1		0.466436		1		0.0401247		1		0.491979		1		0.023323		0.717765	0.214697	0.0337606	1.84415	FALSE
TCF25	6		0.251595		0.289093		0.09929	0.0498824	1.59637	0.98	1		0.60239		1		0.343665		0.461138	0.204238	0.096635	1.72095	FALSE
TCF4	4		1		0.167089		1		0.0120759		1		0.0131339		1		0.010685		0.59182	0.22996	0.0784758	8.32667e-17	FALSE
TCIRG1	4		1		0.00941105		1		0.0104365		1		0.00832229		1		0.0135074		0.333849	0.275048	0.236506	0.565892	FALSE
TECR	8		1		0.078371		1		0.0783394		1		0.00277312		1		3.21684e-17		0.963581	0.0364188	7.41637e-32	2.77556e-17	FALSE
TESC	5		0.384663		0.359107		3.74e-08	0.183682	3.2027	0.92	1		0.482036		1		0.0653072		0.780153	0.10408	0.0443608	1.71712	FALSE
TFF3	4		0.219702		0.167496		1		2.58954		1		0.00425018		1		0.00189829		0.980965	0.0163001	0.00273493	0.124116	FALSE
TFPI	3		0.313258		0.238788		0.00632661	0.0253386	0.900182	0.99	1		0.0534484		0.00237472	0.17679	0.340717	0.92	0.574718	0.278981	0.0538435	0.210678	FALSE
TGFB1	2		1		0.0835727		9.92936e-05	0.766515	2.08201	0.63	1		0.0744534		0.0966842	0.96	0.264578	0.48	0.621786	0.373854	0.00373933	1.97473	FALSE
TGOLN2	2		1		0.159885		1		1.2398		1		0.102276		1		0.0259		0.810113	0.176868	0.0130198	1.45134	FALSE
THBS4	3		1		0.0515487		1		0.34786		1		1.47885		1		0.020576		0.446874	0.20306	0.171703	0.0750562	FALSE
TIMP1	29		1		0.0260935		0	0	3.16228	1	4.1876e-13	0	0.288962	1	1		0.0399048		0.874574	0.073411	0.017444	0.232478	FALSE
TKT	12		1		0.156311		1		0.0549507		0	0.0699526	0.391979	0.97	1		0.0698466		0.887411	0.0392202	0.0369964	2.68739	FALSE
TM4SF1	7		1		0.296676		1		2.03432		1		0.412586		1		0.299455		0.619558	0.169622	0.127999	0.548373	FALSE
TMA7	3		1		0.207146		1		0.169134		1		2.46157e-17		1		5.68064e-18		1	1.06919e-32	4.89465e-63	0.83911	FALSE
TMEM14B	5		1		0.403016		1		0.351031		1		0.379151		1		0.313449		0.495821	0.138539	0.106242	3.34408	FALSE
TMEM176A	5		0.557247		0.0962539		0.0647289	0.89121	2.40105	0.44	1.45256e-08	0.112844	0.286599	0.95	1		0.0611779		0.931695	0.0362516	0.0200554	0.778422	FALSE
TMEM40	3		1		0.0236122		1		0.0599713		1		0.0797989		1		0.150407		0.785977	0.203969	0.0100542	3.81639e-17	FALSE
TMEM50A	2		1		0.174405		1		0.114037		0.548716		0.113995		1		2.92444e-17		0.983427	0.0165725	3.81771e-33	0.136882	FALSE
TMEM59	8		1		0.104889		1		0.0391658		1		0.0432389		1		0.180987		0.704459	0.272918	0.0174963	0.607772	FALSE
TMOD4	2		1		0.28701		1		0.0484473		1		0.0345094		1		0.0893578		0.549835	0.328497	0.0662727	0	FALSE
TMSB10	46		1		0.0251325		1		0.000661112		1		0.000478405		1		0.000857119		0.643905	0.101175	0.0931512	6.93889e-18	FALSE
TNFAIP6	3		1		0.0803572		1		0.00597275		1		0.00824139		1		0.00804906		0.814246	0.148731	0.0280484	0.599467	FALSE
TNFSF10	5		1		0.249333		1		0.734093		1		0.522379		1		0.0111381		0.525408	0.174759	0.143306	0.0659421	FALSE
TNFSF13B	3		1		0.189573		0.71127		0.281833		1		0.0145848		1		0.0355339		0.755957	0.203441	0.0373007	0.637008	FALSE
TNNC1	2		1		0.0717134		0	0	6.29047	1	6.89536e-08	0	0.561896	1	1		0.00298563		0.994112	0.00585921	2.85831e-05	0.954436	FALSE
TNNC2	2		1		0.00602606		1		0.00492026		1		1.93695e-17		1		8.46825e-20		1	1.39323e-29	2.26215e-59	1.73472e-18	FALSE
TNNT1	8		1		0.0976348		0.000206064	0	3.30437	1	7.91757e-07	0	1.69742	1	0	0	1.56811	1	0.623671	0.203031	0.142067	0.268018	FALSE
TOMM7	37		1		0.0203951		1		2.3036		1		0.0682028		1		0.012357		0.955396	0.0260828	0.0102973	0.0368326	FALSE
TOP1	19		1		0.369551		0.0621409	0.325597	1.46229	0.85	5.14932e-06	0	0.70319	1	1		0.0710641		0.532158	0.193911	0.116646	0.698356	FALSE
TPM4	9		0.904164		0.247649		1		1.64109		1		0.280075		3.52908e-11	0.155652	0.500023	0.93	0.493776	0.352011	0.0766052	1.16189	FALSE
TPR	7		0.226727		0.582241		7.06152e-06	0.98	1.535	0.49	1		0.543326		1		0.0777796		0.562775	0.274224	0.0913247	1.42821	FALSE
TRAF3IP3	2		0.128441		0.37699		0.150303		0.49063		1		0.0178717		1		0.161531		0.266214	0.194385	0.155068	0.569878	FALSE
TRAPPC2L	5		1		0.0884003		1		0.0845314		1		0.104003		1		0.0993377		0.594583	0.232917	0.166195	1.29716	FALSE
TRDN	3		1		0.114483		1		2.06894		1		0.607224		1		0.137207		0.417365	0.269185	0.123988	2.49203	FALSE
TREM1	2		1		0.0898786		2.42141e-07	0.406869	2.35952	0.81	1		0.0304985		1		0.22224		0.804551	0.0718236	0.0398056	1.37278	FALSE
TREM2	2		1		0.219957		1		0.0312927		1		0.0297842		1		0.121204		0.757882	0.213783	0.014625	0.584613	FALSE
TRPV2	2		0.787352		0.473779		1		1.0661		1		0.432311		1		0.131585		0.4989	0.177501	0.127376	1.71579	FALSE
TSTD1	4		1		0.209972		1		0.180869		1		0.0634562		1		1.39083e-16		0.908728	0.0912721	4.27157e-31	2.56872	FALSE
TXNL1	4		0.585785		0.0844396		1		0.227485		1		0.324797		1		0.160636		0.487804	0.32722	0.0893925	6.10955	FALSE
TYMP	20		1		0.0191221		1		0.00861173		1		0.0812377		1		0.00871606		0.426891	0.216048	0.16688	0.0471608	FALSE
TYROBP	19		1		0.21104		1		2.79514		0	0	0.725746	1	0	0	1.52329	1	0.501247	0.214344	0.170857	0.565225	FALSE
UBE2B	2		1		0.127775		0.224714		1.90804		0.0657167	1	0.264269	0.5	0.257678		0.427044		0.799035	0.0831166	0.0590919	1.51681	FALSE
UBE2D2	18		0.698434		0.191495		0	0	2.45422	1	1		0.492354		1		0.158264		0.535312	0.177931	0.1582	1.21467	FALSE
UBL5	39		1		0.0615137		0	0	3.47018	1	0	0	1.3326	1	0	0	0.256385	1	0.811358	0.139198	0.0182898	0.283824	FALSE
UBXN1	20		1		0.124852		1		1.05492		1		1.35321		1		0.017907		0.702984	0.272311	0.0101593	0.524818	FALSE
UBXN4	13		0.159254		0.453999		1		0.134838		0.141726	0	0.44911	1	0.00133455	0	0.770651	1	0.506768	0.236861	0.183154	1.16268	FALSE
UCHL3	3		1		0.110067		1		1.46001		1		0.0936804		1		0.0133427		0.765992	0.227306	0.00670167	0.36067	FALSE
UFD1	8		1		0.0747824		1		0.0683144		1		0.0112531		1		5.38714e-05		0.666636	0.331601	0.00176319	0.508063	FALSE
UQCR11	23		1		0.00650321		1		2.42031		1		0.0151624		1		0.00732016		0.984034	0.0102644	0.00535432	0.0129716	FALSE
UQCRH	26		1		0.042786		1		0.00411597		1		0.0405168		1		0.000570136		0.974752	0.0204552	0.00208188	1.3387	FALSE
VIM	40		1		0.0304703		1		1.96029		1		0.475414		1		0.18716		0.57197	0.131757	0.0775078	0.178494	FALSE
VPS29	2		1		0.0985749		1		0.0418549		1		0.0154924		1		0.12816		0.84447	0.139695	0.0135991	0.543918	FALSE
VWF	6		1		0.00561746		1		0.00959409		1		0.0170065		1		0.0429019		0.670551	0.315476	0.0120491	0.0536624	FALSE
WASHC3	2		1		0.369503		1		0.0621196		1		0.311828		1		0.221815		0.782267	0.198871	0.0188617	1.66262	FALSE
WFDC21P	3		1		0.0961117		0.00943306	0.0733846	0.694908	0.97	0.989659		0.220155		1		0.265551		0.649584	0.236712	0.113704	0.47569	FALSE
YIF1A	3		1		0.271066		1		0.19026		1		0.118061		1		0.105324		0.770964	0.169455	0.0595813	2.33494	FALSE
YWHAB	18		1		0.236616		1		0.00758267		1		0.0060317		1		0.0102618		0.59792	0.363223	0.0293581	0.948318	FALSE
ZBTB8OS	4		0.609111		0.160106		6.77382e-09	0	2.0074	1	1		0.518129		1		0.187216		0.452449	0.237946	0.100635	0.700268	FALSE
ZFAND5	6		1		0.265144		1		0.0880711		1.15728e-06	0.385043	0.995565	0.82	1		0.186456		0.84072	0.103939	0.0237907	0.206025	FALSE
ZNF706	3		1		0.283462		1		0.0425504		1		0.230825		1		0.164851		0.80302	0.191243	0.00573726	4.46433	FALSE
ZNHIT1	2		1		0.237082		1		0.234748		1		0.0365924		1		1.1469e-16		0.811126	0.188874	9.66052e-32	4.36641	FALSE
ZRANB2	3		1		0.103418		1		0.0381622		1		0.0730009		1		0.0478038		0.331263	0.299178	0.257121	0.0555284	FALSE
unknown_chr22_22900000	4		0.719326		0.131023		1		0.0657949		1		0.0117414		1		0.0183625		0.756375	0.150669	0.0476932	1.49476	FALSE
unknown_chr2_88900000	2		1		0.231207		1		0.125377		1		0.238206		1		0.169855		0.215608	0.0639965	0.056809	0.554312	FALSE
unknown_chr6_GL000256v2_alt_4e+06	4		1		0.0851988		1		0.00841063		1		0.00804797		1		0.00892746		0.65658	0.286506	0.027973	0.658692	FALSE

## Sheet: table4C
geneR1A_uniq	num_onts	sub_col	chi2_pval_adj_scZ	perm_pval_adj_scZ	max_abs_median_scZ	perm_cdf_scZ	chi2_pval_adj_svd_z0	perm_pval_adj_svd_z0	max_abs_median_svd_z0	perm_cdf_svd_z0	chi2_pval_adj_svd_z1	perm_pval_adj_svd_z1	max_abs_median_svd_z1	perm_cdf_svd_z1	chi2_pval_adj_svd_z2	perm_pval_adj_svd_z2	max_abs_median_svd_z2	perm_cdf_svd_z2	f0	f1	f2	gene_max_diff	sig
A2M	17		2.03356e-08	0	0.486617	1	0	0	2.72362	1	0	0	1.45966	1	4.03002e-07	0	3.03109	1	0.447389	0.155537	0.140916	1.66698	FALSE
NEMF	43		0	0	1.33721	1	0	0	3.09566	1	1		0.686086		0	0	1.28283	1	0.344723	0.155583	0.0903457	3.48453	FALSE
NECTIN3	2		1.3119e-10	0	2.74214	1	6.39054e-11	0	2.23894	1	1		5.02185e-16		1		1.60044e-17		1	9.48762e-32	1.21812e-62	2.5367	FALSE
NECAP1	13		0	0	0.955256	1	0	0	2.49196	1	0.0514302	0.128391	0.88739	0.96	8.43885e-07	0	0.384007	1	0.697506	0.181836	0.0418201	2.55869	FALSE
NDUFV3	19		0	0	1.00769	1	0	0	2.00515	1	0.00041046	0.0395479	1.10553	0.99	1		0.0588775		0.646709	0.243488	0.0631428	2.96772	FALSE
NDUFV2	42		0	0	1.87125	1	0	0	2.25346	1	0.0607382	0	0.660422	1	1		0.0175783		0.63105	0.126139	0.0727595	2.1826	FALSE
NDUFV2-AS1	40		1.96024e-10	0	0.258646	1	0.00163511	0	2.40959	1	1		0.0719379		1		0.280388		0.724574	0.0664746	0.0524398	1.84287	FALSE
NDUFV1	31		0	0	1.29528	1	0	0	3.4705	1	0	0	1.19673	1	1		0.624454		0.641548	0.103425	0.0617694	2.88541	FALSE
NDUFS3	32		0.0122253	0	0.500434	1	0	0	2.25992	1	1		0.237266		1		0.387017		0.504794	0.228523	0.208619	2.13466	FALSE
NFE2L2	30		0	0	1.46071	1	0	0	2.81699	1	1.9277e-09	0	1.30409	1	1		0.109135		0.680196	0.194885	0.0347399	3.48496	FALSE
NDUFS2	37		0.00025553	0	0.645251	1	0	0	4.46223	1	1		1.25664		1		0.424568		0.793876	0.0953766	0.0382443	4.23527	TRUE
NDUFB9	44		0.0109535	0	0.481582	1	1.77447e-11	0	2.25264	1	1		0.517828		1		0.267921		0.806006	0.0639139	0.0242175	1.40671	FALSE
NDST1	6		0.00104864	0	0.587501	1	0.000774138	0.0390774	1.91651	0.99	0.00068887	0.601682	1.01232	0.73	0.681434		0.325822		0.562493	0.146853	0.0883864	2.37875	FALSE
NDEL1	19		0.0104633	0	0.41591	1	0	0	3.76738	1	9.54533e-09	0	2.01793	1	0.000660211	0	0.765683	1	0.587337	0.230523	0.07469	3.21987	TRUE
NCOA7	23		0.000406744	0	0.3963	1	0	0	2.19168	1	1		0.501273		0	0	1.70455	1	0.318837	0.157489	0.0981919	2.85778	FALSE
NCL	49		0.025058	0	0.389599	1	0	0	3.79102	1	1		1.65894		1		0.0314174		0.534423	0.0984634	0.0469403	3.75135	TRUE
NCK1	15		5.59685e-07	0	1.28793	1	1		0.562512		7.05085e-13	0	1.31239	1	0.000457687	0	1.00278	1	0.319352	0.210686	0.126269	2.67931	FALSE
NCALD	7		0	0	1.386	1	3.88537e-07	0	1.55921	1	2.61308e-05	0.071989	1.04823	0.98	0.313609		0.616676		0.231379	0.215197	0.130144	2.98337	FALSE
NBPF1	7		0.0123303	0	0.511599	1	0	0	1.48371	1	1		0.136766		1		0.434761		0.421252	0.215394	0.111612	2.24499	FALSE
NDUFS1	12		0.174074	0	0.227671	1	6.53876e-12	0.0390774	4.74391	0.99	1		0.768659		1		0.542439		0.705449	0.11069	0.0522402	5.4372	TRUE
NFKBIZ	24		0.0007255	0	0.58331	1	0	0	3.07814	1	2.34477e-08	0	1.26627	1	0	0	1.25537	1	0.661789	0.191243	0.0596806	5.95322	FALSE
NFRKB	7		0.0168017	0	0.5886	1	0.00044731	0.339201	1.83279	0.87	6.03193e-07	0.128391	1.39319	0.96	0.097153	0.192327	0.889275	0.93	0.450696	0.192447	0.118699	4.59294	FALSE
NFU1	24		5.66865e-13	0	0.644206	1	3.01814e-11	0	3.33572	1	0	0	1.56293	1	0	0	0.673734	1	0.635491	0.225263	0.0644676	4.05226	FALSE
NSUN5	4		0.000435883	0	0.790969	1	2.42968e-13	0	2.39939	1	1		0.0250601		1		0.138932		0.64366	0.121196	0.0830577	2.12443	FALSE
NSMCE2	8		0.00801644	0	0.351705	1	5.19292e-05	0.101965	2.56546	0.97	1		0.498238		0	0	0.951559	1	0.500677	0.19163	0.109409	3.76376	FALSE
NSMCE1	19		0	0	0.908073	1	0	0	3.37483	1	7.67803e-07	0	0.894386	1	1		0.294315		0.790024	0.0681029	0.0525393	3.25707	FALSE
NSA2	12		1.0765e-05	0	0.880112	1	6.91895e-07	0	1.39511	1	1		0.524228		1		0.167687		0.612504	0.299382	0.0714866	2.59825	FALSE
NRDE2	24		1.92651e-08	0	1.03578	1	0	0.0390774	2.63039	0.99	1		0.0322706		1		0.0193581		0.800469	0.0995028	0.0346046	3.88041	FALSE
NRDC	30		0	0	1.71271	1	0.000525974	0	3.46089	1	0	0	1.52663	1	0	0	1.53322	1	0.476537	0.187501	0.11423	5.55103	FALSE
NR4A1	30		9.66283e-11	0	0.392508	1	0	0	4.07662	1	0	0	1.24591	1	0.359498		0.684762		0.470909	0.0895555	0.0707283	3.80091	TRUE
NR3C1	14		9.1533e-05	0	1.03328	1	4.18475e-05	0	1.57658	1	2.6608e-09	0	1.26063	1	6.43558e-05	0	1.71639	1	0.332564	0.266521	0.125894	3.37476	FALSE
NQO2	9		2.91593e-05	0	0.487683	1	0	0	3.1231	1	0.400101		0.850804		1		0.0398967		0.61978	0.153572	0.061449	3.61273	FALSE
NPL	4		0.00124091	0	0.804684	1	3.96385e-07	0	2.25187	1	0.227512		0.984666		0.636562		0.327859		0.440161	0.175592	0.0769177	2.85066	FALSE
NPHP3-ACAD11	11		0.000692835	0	0.684185	1	1		0.470703		1		0.0559949		1		0.510286		0.472387	0.11732	0.0734606	4.69672	FALSE
NPEPPS	7		0.0358991	0	0.48572	1	0.234226		2.37996		0.000100887	0.128391	1.24863	0.96	0.0353542	0.192327	0.683209	0.93	0.523308	0.197707	0.0802038	3.52015	FALSE
NPC1	20		2.7206e-14	0	0.518122	1	0.000265418	0.155459	1.55639	0.95	4.4418e-15	0	1.37099	1	0.00343362	0	1.42718	1	0.278014	0.21087	0.0805149	2.71849	FALSE
NOSIP	30		1.35384e-09	0	0.378764	1	0	0	3.33541	1	0	0	1.63053	1	1		0.132329		0.735031	0.144864	0.0325207	4.4875	FALSE
NOP53	46		0	0	1.30384	1	0	0	3.48491	1	1		0.597229		0	0	1.17336	1	0.505132	0.149995	0.0616928	3.34991	FALSE
NMT2	2		2.12187e-05	0	1.83962	1	0.0235787	0.155459	2.2319	0.95	0.0191222	0.180137	0.95571	0.94	0.00140635	0	1.10826	1	0.614059	0.130967	0.115213	3.48374	FALSE
NKTR	24		0.0621129	0	0.454038	1	0	0	2.15377	1	1		0.236645		0.420135		0.651932		0.349604	0.133295	0.119978	3.52352	FALSE
NKG7	15		5.97768e-09	0	0.582285	1	4.52254e-10	0.0390774	1.62423	0.99	0.0822379	0.128391	0.551724	0.96	1		0.354461		0.616187	0.143045	0.0628518	4.15416	FALSE
NINJ1	12		0.0156115	0	1.05058	1	0.00823603	0	1.67316	1	0.562056		0.281474		1		0.107736		0.576249	0.159976	0.138216	2.24663	FALSE
NAV3	2		1.65957e-05	0	1.25739	1	1		0.032749		1		0.00210513		1		0.12089		0.251402	0.171066	0.135854	0.152074	FALSE
NUBP1	11		0.00584957	0	0.43057	1	1.27483e-12	0	2.44484	1	0	0	1.72513	1	1		0.327309		0.563187	0.197456	0.0721586	2.81967	FALSE
NAV2	5		1.81698e-06	0	0.810878	1	2.63122e-05	0	0.882402	1	2.38604e-06	0.0395479	0.875678	0.99	1		0.0340345		0.214037	0.20536	0.101713	1.38699	FALSE
NAPA	36		7.97204e-08	0	1.23992	1	0	0	2.83048	1	0	0	2.11014	1	0.000320017	0	0.609751	1	0.680036	0.112108	0.0654968	2.65442	FALSE
MRRF	13		0.000115847	0	0.769324	1	0	0	3.70042	1	0.00624794	0.071989	0.945743	0.98	0.281569	0.0678899	0.988917	0.98	0.521519	0.236471	0.096713	4.26615	TRUE
MRPS21	38		0	0	0.687292	1	0	0	2.41239	1	0	0	0.569164	1	1		0.0293018		0.819206	0.126853	0.0283156	2.21076	FALSE
MRPS18C	27		0.0495088	0	2.55349	1	0.00108773	0	3.39773	1	0.643531		1.2604		1		0.0877939		0.793682	0.149115	0.025857	4.74468	FALSE
MRPL1	12		0.000299467	0	0.35747	1	1		1.76598		6.60147e-07	0.249377	1.00682	0.91	0.00646028	0.35987	0.653	0.85	0.547771	0.20172	0.119706	2.74672	FALSE
MRPL18	30		0	0	0.499414	1	0	0	1.97315	1	2.53571e-14	0	0.802228	1	7.46689e-05	0	0.487647	1	0.457545	0.23084	0.107738	2.95851	FALSE
MPDU1	10		0.00159395	0	0.945399	1	1.32538e-13	0.101965	2.51046	0.97	8.04702e-05	0	2.33845	1	1		0.10369		0.594326	0.262975	0.055315	3.4455	FALSE
MORF4L2	34		1.14674e-06	0	0.436244	1	0	0	1.98656	1	0	0	1.64466	1	2.08185e-13	0	0.99156	1	0.433678	0.247647	0.137681	3.91609	FALSE
MMRN2	22		0	0	0.602796	1	1		0.354383		1		0.267438		1		0.270225		0.222086	0.198758	0.106923	0.762619	FALSE
MRTFA	15		7.40701e-07	0	0.857398	1	0	0	2.1768	1	0.58475		0.741807		0.0759889	0.036918	0.766699	0.99	0.520281	0.212956	0.0898025	3.84755	FALSE
MMP24-AS1-EDEM2	13		0.00169364	0	0.333422	1	0	0	3.81726	1	9.39804e-05	0	0.723413	1	1		0.271067		0.403728	0.104333	0.085533	4.60772	TRUE
MLLT10	6		7.71193e-05	0	0.872445	1	7.52151e-06	0.318936	1.91125	0.88	1		0.444039		0.00122567	0.036918	0.674959	0.99	0.330937	0.177082	0.104196	3.24763	FALSE
MIR99AHG	6		7.70043e-08	0	1.02357	1	1		0.046574		0.390043		0.608484		8.61034e-06	0.0678899	0.761028	0.98	0.222259	0.197455	0.178387	3.47462	FALSE
MIIP	8		0.123887	0	0.389013	1	0	0	3.58499	1	0	0	1.33188	1	0.00218135	0.0678899	0.448319	0.98	0.775477	0.13388	0.0379591	3.53556	TRUE
MIA2	13		0.0712232	0	0.284593	1	2.07355e-05	0.443938	2.40551	0.82	0.00390673	0.0395479	1.32817	0.99	1		0.523691		0.410408	0.177954	0.0907315	3.18758	FALSE
MGST3	40		0.0271167	0	0.515313	1	0.324066		2.84329		1		0.0681695		1		0.0700795		0.79342	0.0584659	0.0452312	2.4352	FALSE
MFSD2A	3		0.000414345	0	0.384767	1	0	0	5.4784	1	0.0011988	0.0395479	0.611101	0.99	1.61456e-06	0	0.774158	1	0.746007	0.0849191	0.036964	3.50562	TRUE
MFSD1	19		0	0	0.623853	1	0	0	4.33867	1	0.00131541	0	0.594372	1	1		0.413178		0.751212	0.105723	0.0583159	4.20422	TRUE
METTL8	4		0.0127299	0	0.748559	1	1		0.255003		1		1.04531		0.303402		0.367242		0.291337	0.20199	0.154662	3.74996	FALSE
MLX	22		0.0383473	0	0.53225	1	0	0.101965	3.3669	0.97	6.11393e-07	0.15545	2.46205	0.95	1		0.607103		0.560577	0.363736	0.0308399	6.3908	FALSE
MS4A6A	4		8.00177e-15	0	0.714178	1	0	0	2.77565	1	0	0	0.836515	1	2.31438e-08	0	0.597704	1	0.714321	0.119969	0.0546188	3.91072	FALSE
MSN	33		0.00509985	0	0.892075	1	0	0	2.833	1	1.17668e-08	0	0.711616	1	8.04774e-07	0	0.472662	1	0.550637	0.0935695	0.0691825	2.78223	FALSE
MT1G	13		0	0	1.01809	1	0	0	1.92296	1	0	0	0.888738	1	1		0.110785		0.44087	0.172447	0.0788327	1.17129	FALSE
NAPA-AS1	31		9.31855e-05	0	0.46789	1	0	0.0390774	1.96794	0.99	0.250369		1.19335		1		0.210385		0.329167	0.207931	0.118748	3.32722	FALSE
NAMPT	20		0.0294578	0	0.522059	1	0	0	2.30056	1	1		0.30158		1		0.525822		0.594262	0.101136	0.0676949	2.23951	FALSE
NADSYN1	15		0.000510296	0	1.49418	1	0.103862		1.87011		0.000747432	0.451799	1.21002	0.81	0.0372569	0.341039	0.626267	0.86	0.482828	0.168522	0.070082	4.30697	FALSE
NACA	56		0	0	0.474298	1	0	0	3.3779	1	0.984896		2.34827		1		0.166088		0.80141	0.131732	0.0376783	3.27055	FALSE
NAA20	27		9.03763e-05	0	0.327043	1	0	0	2.32095	1	0	0	0.834647	1	0	0	0.206586	1	0.610217	0.228923	0.0334268	3.90886	FALSE
MZB1	6		0.00514367	0	2.19672	1	6.49936e-07	0	3.65989	1	1		0.0804072		1		1.29221		0.340354	0.195332	0.185379	5.37511	TRUE
MYO1G	8		1.37198e-06	0	0.754549	1	0	0	2.96163	1	8.78148e-06	0.470884	1.31535	0.8	1		0.426664		0.569295	0.190967	0.0802428	4.35793	FALSE
MYLK-AS1	6		0.135282	0	0.419588	1	1		0.0191913		1		0.00683631		1		0.0519542		0.260289	0.257094	0.200111	3.2464	FALSE
MYL6	64		0	0	1.85609	1	0	0	2.98248	1	0	0	2.46898	1	0	0	0.682462	1	0.695974	0.226336	0.0395181	3.44513	FALSE
MYC	21		0.00883237	0	0.519975	1	1.16738e-06	0.87084	1.25518	0.42	0.00703458	0	1.3549	1	1		0.270761		0.255102	0.177681	0.0964975	4.34924	FALSE
MYBBP1A	6		0.0269779	0	0.83215	1	1		0.684296		9.75165e-06	0.638122	1.08516	0.71	1		0.461796		0.368779	0.259568	0.143014	2.08925	FALSE
MTUS1	16		0.00301354	0	0.702216	1	9.77566e-10	0.101965	2.83683	0.97	0	0	1.69317	1	0.00181181	0	0.556722	1	0.537836	0.136662	0.0671487	3.14639	FALSE
MTURN	4		6.8973e-14	0	1.50495	1	0	0	1.58024	1	1		0.445525		1		0.0538575		0.890113	0.0909452	0.0189422	3.02333	FALSE
MTSS1	17		0.000114662	0	0.546203	1	2.85815e-15	0	2.63416	1	0	0	1.22551	1	1		0.295121		0.523711	0.149299	0.0906078	3.16746	FALSE
MTRR	7		0.00387097	0	0.354775	1	0.41389		2.05431		0.0543725	0.071989	0.947209	0.98	1		0.181708		0.538212	0.137725	0.079852	3.75632	FALSE
MTMR14	12		0.0351432	0	0.826575	1	0	0	3.63536	1	0.00104411	0	1.44955	1	5.46378e-13	0	1.68379	1	0.468009	0.161428	0.117719	3.5278	TRUE
MTG1	25		0.0677615	0	0.34358	1	0	0	4.45181	1	0	0	1.56301	1	3.7675e-09	0	0.468787	1	0.695528	0.136232	0.0521883	4.36419	TRUE
MTDH	35		2.0003e-07	0	0.41471	1	0	0	2.93981	1	0.223043		0.572287		1		0.236959		0.547865	0.172633	0.0496908	7.46921	FALSE
MT2A	41		0.00137132	0	0.197247	1	1		0.535497		1		1.73446		1		0.278993		0.451927	0.154146	0.0848492	9.44606	FALSE
NARF	25		0.00397317	0	0.774297	1	0	0	4.03275	1	0.832317		0.563315		1		0.849063		0.686791	0.0668344	0.0625534	3.84279	TRUE
NUCB2	25		1.96136e-05	0	0.62991	1	9.91069e-11	0	2.31819	1	1		0.3573		0	0	1.10817	1	0.496355	0.165352	0.114559	2.93259	FALSE
NXF1	28		0.000809074	0	0.801521	1	0	0	4.68873	1	0	0	1.67394	1	1		0.261484		0.721225	0.0989553	0.0396944	5.09035	TRUE
OAZ1	62		0	0	0.368997	1	0	0	2.66757	1	1		0.0568339		1		0.1221		0.80137	0.0321249	0.0264187	2.61162	FALSE
POLR1D	27		0	0	1.00271	1	0	0	2.47273	1	0	0	0.936997	1	1		0.123442		0.706655	0.214178	0.034756	2.80499	FALSE
POLR1C	17		0.205506	0	0.655773	1	0.000489751	0.0390774	0.90381	0.99	6.47467e-12	0	2.31025	1	0.181652	0.804149	0.696527	0.61	0.37467	0.279906	0.0715394	4.99076	FALSE
POLD4	21		5.68126e-12	0	1.01767	1	0	0	3.20781	1	2.71272e-05	0	0.565672	1	0.0835269	0.036918	0.230247	0.99	0.758181	0.153115	0.0239772	3.75484	FALSE
PNRC1	36		0	0	0.960486	1	0	0	0.92386	1	1.62854e-07	0	0.556392	1	1		0.0668582		0.502436	0.104488	0.0756468	3.8203	FALSE
PNP	17		0	0	0.701029	1	0	0	2.98979	1	0	0	1.21897	1	1		0.0451644		0.817016	0.0889601	0.0272569	3.01899	FALSE
PNISR	43		0.0596569	0	0.297824	1	0	0	2.97181	1	0	0	1.74364	1	1.4024e-08	0.238805	0.802474	0.91	0.472897	0.229659	0.105853	5.10209	FALSE
PMPCB	36		3.18518e-08	0	2.40882	1	0	0	2.64591	1	0	0	3.77866	1	1		0.241963		0.449442	0.318944	0.082869	5.0749	FALSE
PLTP	7		0	0	0.350659	1	0	0	3.82488	1	0.000223394	0	0.494107	1	0	0	0.669114	1	0.846609	0.0559751	0.0278611	3.59009	TRUE
POLR3H	18		0	0	0.963185	1	0	0	1.63208	1	0	0	0.827144	1	1		0.0888205		0.465559	0.189167	0.124833	2.7554	FALSE
PLSCR1	22		0.000627872	0	0.589784	1	1.10481e-14	0	3.27528	1	2.24843e-15	0	0.879264	1	4.93019e-11	0.192327	0.985827	0.93	0.56398	0.180709	0.105782	3.49138	FALSE
PLEK	9		7.78609e-08	0	0.532814	1	0	0	2.87948	1	0	0	0.796339	1	0	0	0.661505	1	0.781687	0.104726	0.0653098	3.25137	FALSE
PLEKHO1	5		0.115752	0	0.526437	1	1.61001e-06	0.629953	2.71164	0.72	1		0.236295		1		0.251647		0.596527	0.195271	0.0861335	2.83688	FALSE
PLEKHA1	8		2.27553e-06	0	0.529364	1	1.68386e-05	0.204298	3.19838	0.93	0	0	2.50362	1	0.000270432	0.0678899	1.51679	0.98	0.401316	0.330946	0.169251	4.46522	FALSE
PLD3	23		0.000539604	0	0.413039	1	0	0	4.03002	1	0	0	1.48332	1	0	0	2.06979	1	0.493916	0.170138	0.11589	6.58695	TRUE
PLAUR	13		5.12292e-06	0	0.467776	1	0	0	3.11419	1	1		0.518964		1		0.150641		0.654244	0.115074	0.0792817	3.11261	FALSE
PLA2G4B	2		0.0490777	0	0.36201	1	1		1.13077		0.00130579	0.128391	1.27276	0.96	0.427268		0.344636		0.500288	0.20992	0.113121	4.82091	FALSE
PKP4	8		0.00955983	0	1.50226	1	1		0.574015		1		0.16309		1		0.377877		0.26726	0.20981	0.140198	3.74512	FALSE
PKNOX1	6		0.170159	0	0.311494	1	2.49254e-07	0.155459	3.18157	0.95	0.019651	0	0.847136	1	0.422681		0.432959		0.683063	0.125818	0.080741	3.49246	FALSE
PLIN2	23		0.00359383	0	0.555276	1	0	0	4.04637	1	0	0	1.51717	1	0.000537494	0	0.279864	1	0.659165	0.155564	0.0416207	2.86327	TRUE
PON2	19		3.4361e-05	0	0.567683	1	0	0	3.13488	1	0	0	1.83147	1	0.00829093	0	1.061	1	0.567351	0.134327	0.111198	3.72273	FALSE
PPFIBP2	6		1.50551e-12	0	1.76684	1	0.000431454	0.297339	1.91187	0.89	0.643531		0.605398		1		0.457282		0.473154	0.112936	0.0761493	3.60639	FALSE
PPIB	53		0	0	0.910741	1	0.113997		1.92705		1		0.156349		7.9501e-05	0	0.373898	1	0.660769	0.218269	0.0488651	1.86484	FALSE
PSMB1	50		0.000685045	0	0.74607	1	0	0	3.08564	1	3.34444e-12	0	1.18274	1	1		0.103987		0.898737	0.0312784	0.0210155	3.78519	FALSE
PSMB10	37		0.0784574	0	0.670805	1	5.45061e-13	0	3.50486	1	1		0.41852		1.75386e-09	0	0.952751	1	0.766611	0.0881153	0.0359207	3.06877	TRUE
PSAP	45		1.07799e-10	0	0.207791	1	0	0	4.72838	1	0	0	4.32446	1	1		0.223174		0.526042	0.261217	0.0354019	4.02671	TRUE
PRXL2A	14		0.115965	0	0.351288	1	0	0.0720952	2.79677	0.98	0.691205		1.39725		0	0	2.34619	1	0.515993	0.199031	0.174534	5.06156	FALSE
PRRX2	4		0.00323634	0	0.684781	1	0.0207828	0	0.95968	1	1		1.11865		1		0.218429		0.560046	0.350009	0.0878244	3.32451	FALSE
PRPF38B	33		0	0	1.46099	1	0	0	1.87056	1	6.41359e-14	0	1.09968	1	0.0545196	0	0.261016	1	0.374399	0.218104	0.157558	3.51222	FALSE
PRODH	5		2.04426e-05	0	0.547925	1	8.33901e-15	0	2.54643	1	0.0115145	0	0.918908	1	1		0.151054		0.710676	0.135273	0.0689697	2.63075	FALSE
PROCR	4		1.64098e-05	0	1.18247	1	0.00615195	0.0390774	1.40887	0.99	1		0.399088		0.0795358	0	0.163185	1	0.560973	0.283131	0.0590671	1.40887	FALSE
PRMT2	31		2.7206e-14	0	1.5408	1	0	0	3.36633	1	2.53571e-14	0	2.38634	1	1.51145e-14	0	1.01332	1	0.402863	0.340772	0.106223	5.03408	FALSE
PRKAR1A	24		0	0	1.65198	1	0	0	2.74173	1	0	0	1.52514	1	0	0	0.847648	1	0.432486	0.137204	0.097476	2.59465	FALSE
PRIM1	6		0.000161554	0	0.474449	1	0.272905		1.92376		8.67855e-08	0	1.52421	1	0	0	0.7106	1	0.555401	0.216613	0.0784942	2.50322	FALSE
PRDM1	9		0	0	0.94405	1	0.614882		0.388374		0	0	1.12476	1	9.99388e-12	0	1.02214	1	0.494234	0.331745	0.0951475	2.79924	FALSE
PRCP	17		0.134212	0	1.39865	1	1.44617e-15	0	3.2776	1	1		0.353478		0.0575606	0	1.1795	1	0.823512	0.0995958	0.0345222	3.32958	FALSE
PPP3CB	2		1.72054e-06	0	1.22093	1	3.5476e-05	0.155459	1.31513	0.95	0.741873		0.243332		1		0.248628		0.453156	0.262224	0.130887	3.26156	FALSE
PPP2R2A	10		0.0545839	0	0.601091	1	0.0127877	0.71726	2.64826	0.67	0.381063		0.690297		1		0.360778		0.585478	0.164119	0.0984059	3.94212	FALSE
PPP1R7	25		0.0242294	0	0.537028	1	0	0	3.29345	1	5.77119e-07	0.180137	2.19618	0.06	1.39156e-07	0.216409	1.33508	0.92	0.438729	0.295106	0.130166	4.99021	FALSE
PPP1R12A	32		1.01507e-09	0	0.976455	1	0	0	2.52273	1	0	0	2.31103	1	0.114659	0	0.7477	1	0.344486	0.280502	0.189543	3.01663	FALSE
PPM1K	10		0.0257578	0	0.76561	1	7.02656e-06	0.155459	2.42075	0.95	0.195503		0.5108		0.539736		0.373209		0.625716	0.154869	0.0887744	3.36699	FALSE
PPM1G	21		2.20589e-05	0	0.762233	1	0	0	3.50906	1	0.670577		1.01872		0.00371768	0	1.16014	1	0.671887	0.104266	0.0544462	3.30542	TRUE
PKN1	18		0	0	0.980719	1	0	0	2.4586	1	1		1.12505		1		0.155037		0.539264	0.161896	0.0823353	3.71568	FALSE
PKIG	18		0.0351614	0	0.285918	1	0	0	2.34888	1	0	0	2.03611	1	1		0.043452		0.528734	0.341747	0.0497183	2.0162	FALSE
PITRM1	9		0.0118206	0	0.497512	1	0.130075		1.46341		0.554502		0.426293		1		0.713967		0.500741	0.132825	0.0940616	4.44002	FALSE
PITPNC1	12		0.000883955	0	1.74435	1	5.89376e-10	0	2.12133	1	2.15412e-11	0	1.40367	1	1		0.612948		0.566549	0.153112	0.0679678	2.37275	FALSE
PDE2A	4		3.24952e-11	0	1.27049	1	0	0	1.86899	1	0.00065557	0.128391	1.26263	0.96	0.00792489	0.0678899	0.813903	0.98	0.423065	0.184688	0.16125	1.84933	FALSE
PDE12	33		1.4867e-12	0	0.502235	1	0	0	2.36399	1	1		0.420933		0	0	1.11678	1	0.306159	0.137263	0.125234	2.73972	FALSE
PDCD6IP	21		0.0156036	0	0.978452	1	3.80668e-09	0	3.21036	1	0.00866561	0.3179	1.14531	0.88	5.09046e-05	0.120434	0.920546	0.96	0.587932	0.14167	0.102889	4.82592	FALSE
PDCD5	35		0	0	0.453803	1	8.08806e-05	0	3.49944	1	0	0	1.06176	1	0	0	0.993696	1	0.748908	0.136688	0.0570704	4.70982	FALSE
PCYT2	6		0.0213305	0	0.219577	1	1.38188e-08	0.129398	3.22746	0.96	0.00624352	0.272623	0.618838	0.9	1		0.141729		0.624398	0.212235	0.0838913	3.66663	FALSE
PCSK7	13		8.77404e-05	0	0.685309	1	1.37612e-09	0	2.2875	1	1		0.0966243		0.0350262	0	0.789107	1	0.503063	0.111444	0.061676	3.35927	FALSE
PCK1	5		0.0227575	0	0.275535	1	2.90851e-10	0	3.31018	1	6.56886e-15	0	2.61176	1	1		0.158232		0.56568	0.294872	0.0289073	2.44221	FALSE
PCAT19	8		4.10657e-15	0	1.14491	1	0.372719		1.3363		0.000208584	0	0.637554	1	0.00219205	0	0.36314	1	0.503268	0.229458	0.168636	1.15575	FALSE
PARP6	9		0.0205845	0	0.541772	1	5.59048e-12	0	2.97368	1	0.263123		0.881715		0.510703		0.787236		0.460559	0.138696	0.115553	4.02156	FALSE
PARK7	43		0.00169364	0	0.23793	1	0	0	3.46666	1	0	0	3.24676	1	1		0.0525912		0.485315	0.376762	0.0283669	3.71292	FALSE
PAK1	14		1.50174e-10	0	1.35083	1	2.76272e-14	0	2.3141	1	0	0	1.55239	1	1		0.258408		0.475218	0.201777	0.10754	3.41349	FALSE
PAFAH1B1	17		0.0171505	0	1.54823	1	2.38259e-12	0	2.24364	1	1		0.801841		0.0615125	0	0.78565	1	0.561498	0.115977	0.0904157	4.00398	FALSE
PABPN1	22		0.00738028	0	0.656099	1	2.3988e-10	0	1.36308	1	1		0.0933534		1		0.122228		0.296387	0.145768	0.131158	1.11192	FALSE
PABPC1	55		0.00346177	0	0.223598	1	0	0	4.56105	1	0	0	1.57391	1	0	0	0.546849	1	0.648849	0.119698	0.0465669	3.7458	TRUE
PA2G4	30		0	0	0.884896	1	0	0	2.42737	1	0	0	0.807875	1	1		0.0407847		0.821654	0.0799182	0.025807	2.12872	FALSE
OXCT1	5		0.150206	0	0.533457	1	0.0072147	0.297339	2.21326	0.89	0.0823136	0.673935	0.968055	0.69	0.000755345	0	1.00201	1	0.583833	0.161187	0.0559445	4.49128	FALSE
OSR2	4		2.82657e-09	0	0.559963	1	3.37347e-10	0	1.43867	1	0	0.0395479	1.3802	0.99	1		0.126118		0.419568	0.318897	0.0887438	1.73579	FALSE
OSBPL8	29		3.65232e-07	0	0.760226	1	7.3464e-07	0	1.84554	1	0.494066		0.818034		3.97531e-14	0.036918	0.802147	0.99	0.369205	0.231565	0.146626	3.29065	FALSE
OGDH	18		0	0	2.48417	1	0	0	2.07636	1	0	0	1.43431	1	3.58922e-06	0	0.596116	1	0.511079	0.208868	0.0731655	3.72999	FALSE
PDE4DIP	6		0.0536353	0	0.476357	1	3.18373e-05	0.129398	1.05303	0.96	1		0.150336		1		0.11815		0.383461	0.270666	0.159678	2.74747	FALSE
METTL26	27		5.37099e-13	0	2.22377	1	0	0	1.65779	1	1.64089e-06	0	1.90009	1	1		1.16172		0.414576	0.323093	0.139622	4.30089	FALSE
PDE4D	8		0	0	0.688132	1	0	0	1.74592	1	0	0	0.989141	1	1		0.153883		0.253086	0.124705	0.0890914	2.50669	FALSE
PDK3	7		0.000104077	0	1.06581	1	4.24817e-15	0.0390774	2.88061	0.99	0.000292641	0	0.836859	1	0.100734	0.036918	0.469648	0.99	0.67128	0.117962	0.0766367	4.94276	FALSE
PISD	6		6.38207e-05	0	0.432954	1	4.21628e-07	0	3.21384	1	0	0	1.7289	1	0.846336		0.49544		0.484531	0.214793	0.065431	3.60309	FALSE
PINLYP	2		0.0392397	0	0.829832	1	0.0107455	0	0.829625	1	0.835946		0.330924		1		7.03379e-17		0.601101	0.398899	4.43122e-33	1.01598	FALSE
PIM1	18		0.0754531	0	0.623299	1	1.85838e-11	0	2.17464	1	1		0.186732		0.771654		0.289767		0.627858	0.143405	0.0487435	4.15306	FALSE
PILRB	10		0.16913	0	0.285213	1	0.338171		0.414403		0	0.071989	1.95305	0.98	1		0.088912		0.436509	0.368327	0.149322	0.559488	FALSE
PIK3R1	18		1.75857e-07	0	0.648795	1	0	0	3.25558	1	0	0	1.78753	1	1		0.253959		0.560325	0.142074	0.0881248	3.96847	FALSE
PIK3AP1	4		0.00774053	0	0.871614	1	3.83257e-05	0.155459	1.50951	0.95	0.00334092	0.0395479	0.855545	0.99	0.73936		0.401513		0.368348	0.165042	0.117269	2.14337	FALSE
PIGO	2		0.0283989	0	0.522961	1	1		0.63941		1		1.04405		0.461468		0.632502		0.635973	0.166652	0.0744318	4.61938	FALSE
PICALM	14		0.00255999	0	0.737921	1	0.000629396	0.129398	2.38637	0.96	0.67318		0.751261		1.45858e-09	0	1.47065	1	0.349804	0.157037	0.127212	2.74805	FALSE
PHGDH	8		0.0136885	0	0.196134	1	1.45677e-10	0	3.66645	1	9.43202e-05	0	0.270863	1	1		0.0480941		0.794122	0.0755266	0.0315402	3.27582	TRUE
PHC3	22		4.12092e-05	0	0.452739	1	0	0	3.10204	1	1		1.49631		1		0.350297		0.567805	0.115345	0.0770387	3.70412	FALSE
PGS1	7		0.0177326	0	0.375032	1	4.362e-10	0	2.83814	1	0.00231391	0.864716	0.894876	0.58	0.0278484	0.170043	0.852681	0.94	0.430466	0.174355	0.114357	3.06125	FALSE
PGLS	13		0	0	0.626181	1	0	0	2.57955	1	1		0.185241		0.722673		0.443965		0.855164	0.0645176	0.0449578	2.41989	FALSE
PGD	15		0.000171728	0	0.853615	1	0	0	4.37734	1	0.392316		0.344351		1		0.224786		0.787629	0.0667711	0.0302743	4.22122	TRUE
PFDN5	59		0	0	0.58837	1	0	0	2.78553	1	1		0.972001		0.000834481	0	0.574935	1	0.744473	0.114042	0.0397853	5.25579	FALSE
PEX11B	5		8.73821e-08	0	0.929277	1	0.0047264	0.0720952	1.92996	0.98	0.272006		0.328438		1		0.171682		0.795063	0.110423	0.0374843	2.56047	FALSE
PES1	3		0.000470612	0	0.521761	1	4.07573e-12	0	2.02605	1	1		0.0148617		1		0.104991		0.574645	0.0789206	0.0669928	2.79612	FALSE
PECAM1	15		0.000624571	0	0.55318	1	0	0	4.70219	1	5.59667e-14	0	4.40878	1	2.78064e-09	0	1.96868	1	0.592989	0.0949293	0.0753246	5.24019	TRUE
PDXK	10		0	0	1.09649	1	0	0	3.94082	1	1.76636e-13	0	0.77341	1	8.80325e-13	0	0.726264	1	0.788603	0.0923483	0.0486835	6.71381	TRUE
PDLIM5	17		1.17273e-12	0	0.767722	1	0.000882746	0.228154	1.52173	0.92	0.00213063	0.0395479	1.99727	0.99	0.00477105	0.036918	0.530156	0.99	0.413439	0.170151	0.121672	3.50117	FALSE
PDHB	28		0.117552	0	0.672701	1	0.609407		4.07836		1		0.014217		1		0.622668		0.845608	0.0808438	0.0284933	6.55892	FALSE
PSMB7	35		0.0158954	0	1.51304	1	1		2.31346		1		1.04018		1		0.466052		0.873031	0.0555263	0.0378514	2.3238	FALSE
MEST	6		0.0303769	0	0.300762	1	0	0	3.76019	1	0	0	2.04998	1	8.10984e-06	0	0.78124	1	0.606638	0.260752	0.104603	2.32824	TRUE
MED31	9		0.000425994	0	1.35227	1	3.30814e-08	0	2.27204	1	0.00468794	0	1.87035	1	1		0.0212406		0.798954	0.176021	0.0134039	4.35504	FALSE
IDH2	27		1.1775e-07	0	0.737893	1	0	0	3.47574	1	1		0.110827		0.00459282	0	0.612511	1	0.874242	0.0365261	0.0288943	3.36607	FALSE
ID4	7		0.0118338	0	0.789823	1	0.547291		0.836556		1		0.453149		1		0.0562491		0.5953	0.083427	0.0519841	2.15553	FALSE
ICAM3	22		0.024752	0	0.67198	1	0	0	2.41331	1	1		0.271826		0	0	0.551169	1	0.711098	0.113603	0.0489252	2.23716	FALSE
HYAL2	10		0	0	0.714852	1	0	0	3.08816	1	0	0	2.25492	1	1		0.597461		0.630465	0.105846	0.072138	5.84578	FALSE
HTATIP2	17		0.203196	0	0.812391	1	0	0.129398	3.61041	0.96	1		1.37089		1		0.12794		0.631272	0.246894	0.0574836	5.32344	FALSE
HSPH1	30		0	0	0.554147	1	0	0	3.39089	1	0	0	3.35958	1	0	0	1.64896	1	0.470818	0.271898	0.06402	4.45794	FALSE
HSPB1	38		0	0	0.849647	1	1		0.074062		0.397851		0.639321		0.00106901	0	0.920582	1	0.477932	0.0512633	0.0470044	17.4568	FALSE
HSPA9	33		0	0	0.602144	1	0	0	4.59761	1	0.0171111	0.0395479	1.15349	0.99	1.19827e-05	0.0678899	0.761269	0.98	0.695588	0.089953	0.0762122	6.65787	TRUE
IDI1	23		8.00177e-15	0	0.821929	1	0	0	2.75421	1	0	0	1.07168	1	1		0.326955		0.781038	0.11297	0.0455008	4.22005	FALSE
HSPA8	51		4.81192e-05	0	0.475889	1	0	0	2.96338	1	4.8611e-05	0	2.92608	1	1		0.6713		0.757346	0.0889897	0.0280823	6.71172	FALSE
HSP90AB1	54		9.8659e-05	0	0.301356	1	0	0	3.87406	1	1.33073e-07	0	0.404098	1	1		0.533777		0.632444	0.0694878	0.040819	3.76077	TRUE
HSD17B7	13		0.00230089	0	0.627106	1	0	0	2.04814	1	0.0001049	0	0.521989	1	1		0.211042		0.599538	0.135051	0.0811865	3.74777	FALSE
HSD17B4	16		1.68167e-10	0	1.25913	1	3.3567e-14	0.252424	2.94931	0.91	0	0.375036	1.47802	0.85	1.81768e-11	0	1.38599	1	0.662857	0.168048	0.0647096	5.04865	FALSE
HP1BP3	29		0	0	1.2548	1	0	0	2.58141	1	1.08175e-14	0	1.86468	1	4.16326e-10	0	1.1167	1	0.47733	0.169681	0.140629	4.95677	FALSE
HOTAIRM1	6		1.27587e-13	0	1.55138	1	0	0	1.55338	1	1		0.178865		1		0.0284408		0.890058	0.0462644	0.0311697	3.08096	FALSE
HOPX	14		0	0	1.08937	1	0	0	2.65009	1	1		0.0617916		0	0	0.831337	1	0.707181	0.128033	0.0635726	3.54988	FALSE
HOOK2	7		1.87469e-06	0	1.12702	1	3.15341e-08	0	1.58755	1	0	0	1.6711	1	1		0.259829		0.408601	0.254966	0.0989791	2.39655	FALSE
HNRNPUL2-BSCL2	16		0.078517	0	0.40602	1	0	0	3.45621	1	1.03503e-06	0.638122	1.7766	0.71	0.000582349	0	1.11337	1	0.521935	0.309859	0.0573989	3.34909	FALSE
HSPA5	46		0	0	0.450423	1	0	0	2.77083	1	1		0.0846892		1		0.0592808		0.656452	0.116137	0.0351142	2.61543	FALSE
IFFO1	3		0.000804975	0	0.776936	1	2.21601e-06	0.0390774	1.91656	0.99	1		0.563021		0.454952		0.760097		0.488882	0.140141	0.125015	2.53061	FALSE
IFI16	45		6.17467e-06	0	0.713922	1	0	0	2.34605	1	0.138193	0	1.10702	1	0	0	1.00841	1	0.447235	0.240952	0.112086	2.01132	FALSE
IFITM2	2		0.0169396	0	0.417799	1	1		0.0305252		1		0.0326937		0.0123241	0	0.403135	1	0.314595	0.171476	0.148869	0.101809	FALSE
ITGAE	20		3.44933e-12	0	0.76465	1	8.53611e-11	0	2.81583	1	0.0234658	0	1.1474	1	1		0.082297		0.791951	0.128888	0.0497084	4.51965	FALSE
ITGA4	16		1.86243e-13	0	1.41934	1	2.88417e-07	0.101965	3.08409	0.97	6.56886e-15	0	1.23817	1	1.7845e-08	0	1.65827	1	0.525498	0.17162	0.079098	3.59119	FALSE
ITGA1	11		0	0	1.42532	1	0.768835		0.863362		0	0	1.08248	1	1		0.60514		0.368069	0.311528	0.128887	3.30889	FALSE
ITFG1	21		4.21732e-08	0	0.708449	1	0	0	4.00207	1	1		0.189231		0.0213256	0.341039	0.532425	0.86	0.747407	0.105317	0.0323733	5.45333	TRUE
ISG20	38		0	0	0.467914	1	0	0	1.22432	1	1		0.431149		1		1.00894		0.291876	0.226399	0.162876	3.77763	FALSE
IRF1	23		0	0	0.914479	1	0	0	2.91571	1	0	0	2.04016	1	1		0.430718		0.427329	0.174554	0.135919	4.52248	FALSE
IQCG	57		0	0	0.48365	1	1		0.136057		0	0	1.01987	1	1		0.0439301		0.381507	0.168096	0.092173	0.536416	FALSE
IP6K2	23		0.00293248	0	0.790817	1	4.55962e-05	0.402659	1.82547	0.84	0	0	1.40166	1	0.0547694	0.47378	0.759933	0.79	0.456872	0.264751	0.119783	3.6461	FALSE
IMMP2L	6		0.00220414	0	0.362391	1	3.92466e-12	0.101965	2.63285	0.97	0.42745		0.482137		1		0.0680386		0.509584	0.181857	0.111722	2.97761	FALSE
ILVBL	6		0.00103758	0	0.442052	1	3.609e-11	0	3.39756	1	0.0922541	0.601682	1.01838	0.73	3.1982e-11	0	1.03634	1	0.687724	0.153302	0.0697061	3.43468	FALSE
IL7R	18		2.11786e-10	0	0.561318	1	0	0	2.91781	1	0	0	1.95959	1	1		0.357234		0.618441	0.234814	0.0518353	2.63916	FALSE
IL1RN	4		1.3504e-09	0	0.711152	1	7.2792e-16	0	3.29667	1	3.1452e-14	0	1.21515	1	0.0166157	0	0.729102	1	0.596598	0.242079	0.0698091	0	FALSE
IL1B	3		8.56481e-06	0	0.362593	1	0	0.101965	4.01773	0.97	1		0.0862557		1		0.0796211		0.80394	0.0667289	0.0524173	5.75587	FALSE
IL11RA	5		0.0109805	0	0.795757	1	4.82964e-05	0	2.84143	1	1		0.312004		0.196578	0	0.596042	1	0.502563	0.169812	0.0891149	2.26941	FALSE
IK	42		0	0	1.76185	1	0	0	3.03607	1	0	0	1.30067	1	1		0.207528		0.734091	0.131836	0.0679232	2.89762	FALSE
IGSF8	6		9.08553e-06	0	0.812419	1	0.0122694	0.0390774	1.81011	0.99	5.13064e-10	0	0.914899	1	1		0.528996		0.514985	0.211687	0.121668	2.82745	FALSE
IFT52	10		0.0160839	0	0.632583	1	0	0	3.7357	1	3.95529e-05	0.431146	2.05372	0.82	1		0.265893		0.673653	0.149373	0.0793653	4.79671	TRUE
IFT27	8		0.00242591	0	1.0585	1	0.0410701	0	1.75052	1	1		0.206508		1		0.121104		0.575426	0.129368	0.106839	3.25376	FALSE
IFT20	18		0.0481032	0	0.586127	1	1.88165e-11	0	2.92316	1	2.88312e-06	0	1.83832	1	1		0.0354638		0.799938	0.172452	0.0103348	5.34669	FALSE
HNRNPM	36		0	0	0.689749	1	0	0	3.04009	1	1		0.358698		1		0.852635		0.539405	0.194251	0.0992533	4.81754	FALSE
ITGB1	34		0	0	1.04159	1	0.0217795	0.101965	3.37772	0.97	0	0	1.02471	1	1		0.28429		0.765794	0.088129	0.0528022	2.73004	FALSE
HNRNPH3	23		8.37108e-14	0	0.930983	1	0	0	1.32543	1	1		0.487007		1		0.564009		0.432059	0.314733	0.241496	2.55011	FALSE
HNRNPF	25		7.6239e-09	0	0.391904	1	0	0	2.38962	1	0	0	2.05252	1	1		0.21935		0.628151	0.311946	0.0206237	2.35961	FALSE
GRN	25		1.5829e-14	0	0.391374	1	0	0	6.01467	1	1		0.238939		0.00568011	0	0.225767	1	0.682431	0.0810749	0.0481625	7.63633	TRUE
GRK6	11		0.00112091	0	0.856811	1	1.44617e-15	0.101965	3.08358	0.97	0	0	2.45049	1	1		0.117316		0.51457	0.245811	0.0864991	4.30874	FALSE
GRINA	13		0.00608849	0	0.433734	1	3.06861e-10	0	2.80611	1	0.00736622	0.563332	1.2907	0.75	1		0.519393		0.646105	0.218913	0.0688437	5.07714	FALSE
GRID1	2		0.0100917	0	0.919205	1	3.01164e-10	0	2.73959	1	0.0525738	0.563332	0.521329	0.75	0.0838398	0.036918	0.414885	0.99	0.649173	0.139431	0.0711885	2.93635	FALSE
GPX4	43		0.0275891	0	0.53526	1	0.114618		4.14359		4.84832e-05	0	1.39901	1	0.487589		0.815391		0.89828	0.0476785	0.0245754	6.03457	FALSE
GPX3	21		0	0	0.19096	1	0	0	3.4903	1	0	0	2.25638	1	1		1.24091		0.202347	0.0800204	0.0656035	2.70674	FALSE
GPX2	2		1.17851e-05	0	4.34975	1	3.64012e-08	0	3.43969	1	0.0377714	0.128391	2.17343	0.96	1		4.33109e-17		0.523386	0.476614	1.01636e-32	0.104149	FALSE
GPS2	35		0.111496	0	0.499017	1	0	0	3.83528	1	2.59487e-07	0	1.66624	1	1		0.231838		0.761505	0.140971	0.0286165	6.27572	TRUE
GSTK1	43		0	0	2.00562	1	1.10393e-05	0	2.00575	1	0.00189144	0	0.6999	1	0	0	1.83906	1	0.562907	0.203	0.0883662	2.2217	FALSE
GPR75-ASB3	30		1.10915e-06	0	1.23219	1	0.211323		2.174		8.0952e-10	0	0.885568	1	1.85206e-07	0	1.48703	1	0.345777	0.148993	0.0885257	4.27469	FALSE
GPAT4	5		4.09951e-05	0	0.778957	1	1.19966e-07	0.0720952	3.65233	0.98	4.69787e-13	0	1.12068	1	0.00169867	0.28026	0.40471	0.89	0.708575	0.108778	0.0588772	4.63292	FALSE
GOLM1	12		0.0342521	0	0.583379	1	0	0.204298	3.29979	0.93	9.26077e-05	0	1.81315	1	5.3666e-06	0	0.808985	1	0.675884	0.193758	0.0656734	3.32801	FALSE
GOLGA2	8		4.10657e-15	0	1.40062	1	0	0	3.00228	1	0.259119		0.800648		1		0.0527		0.747953	0.11094	0.0685027	4.56856	FALSE
GNPAT	19		0.00295376	0	0.718194	1	1.32538e-13	0.0390774	3.54579	0.99	0	0	1.7238	1	0.0575606	0	0.580316	1	0.623725	0.15172	0.0794305	4.81746	TRUE
GNAS	50		0.000266473	0	0.471929	1	0	0	3.56957	1	0.0515905	0	2.49909	1	1		0.9776		0.350584	0.266529	0.105412	4.09414	TRUE
GNAI2	32		0	0	1.18879	1	0	0	3.67178	1	0	0	0.911321	1	0	0	0.936746	1	0.68286	0.095165	0.0376879	3.19533	TRUE
GMFG	38		0	0	0.876049	1	0	0	2.85975	1	1		0.14942		0.000775897	0	0.906521	1	0.56581	0.150133	0.0890284	3.6352	FALSE
GMFB	4		0.137133	0	0.539638	1	1.16753e-07	0.501711	3.50808	0.79	0.0176936	0.356142	0.735938	0.86	0.136657	0	0.406419	1	0.662041	0.1517	0.0605342	3.41521	FALSE
GPNMB	5		0.085659	0	0.158315	1	0	0	3.83156	1	0.00170897	0.619494	0.67123	0.72	1.08907e-06	0.036918	0.471324	0.99	0.698493	0.150277	0.0650208	3.67775	TRUE
GSTO1	31		1.91285e-05	0	0.640335	1	0	0	2.96659	1	1		0.672299		1		0.288958		0.92016	0.0485119	0.0127829	2.59515	FALSE
GTF3A	39		0.152266	0	1.04134	1	0	0	3.24905	1	1		0.53705		1		0.822861		0.829525	0.0676544	0.0303685	2.97494	FALSE
GTPBP8	5		8.47798e-06	0	1.46913	1	6.52953e-06	0.0720952	1.50629	0.98	0.715629		0.687897		0.0202203	0.036918	1.25975	0.99	0.524928	0.283962	0.0965187	4.02917	FALSE
HNRNPD	32		0	0	1.19612	1	3.17115e-12	0.339201	1.68592	0.87	1.27449e-10	0.0395479	1.58564	0.99	1.02182e-14	0.120434	0.973778	0.96	0.405986	0.345782	0.138697	4.20953	FALSE
HNRNPDL	44		0.123702	0	0.81242	1	0	0	3.47831	1	1.55404e-06	0	1.243	1	1		0.213781		0.756154	0.174595	0.0207975	4.50809	FALSE
HNRNPC	46		0.0574443	0	0.545325	1	6.62434e-13	0	1.01351	1	1.45085e-05	0.071989	1.20715	0.98	0.000108886	0.28026	0.80256	0.89	0.340132	0.177571	0.173626	6.91516	FALSE
HMGN2	53		0.0484056	0	0.418658	1	1		2.41079		1		0.0380561		1		0.0154839		0.858659	0.0416799	0.0359572	2.0139	FALSE
HIF1A-AS3	19		0.00137969	0	0.758992	1	0	0	2.64623	1	1		0.26195		1		0.268015		0.557947	0.151397	0.0674848	4.55749	FALSE
HEXB	31		0	0	1.35215	1	0	0	3.74305	1	0	0	1.16442	1	0.000307361	0	0.506016	1	0.837154	0.0584444	0.0247252	3.29776	TRUE
HES4	5		8.10055e-10	0	1.16984	1	6.8483e-11	0.0720952	2.12071	0.98	1		0.51365		1		0.0440901		0.742025	0.138692	0.0498773	2.95948	FALSE
HDGFL3	9		2.43869e-06	0	1.23034	1	0.000616252	0.101965	1.05199	0.97	0.00317799	0	0.533847	1	7.87081e-05	0.341039	0.527525	0.86	0.338993	0.26324	0.0935757	1.04575	FALSE
HCST	25		0.0214728	0	0.724773	1	0.421507		2.07631		1.50547e-14	0.203749	1.42416	0.93	1		0.0341935		0.567364	0.236832	0.11061	1.2949	FALSE
HAS2	4		0	0	1.14846	1	0	0.0390774	2.24349	0.99	0	0.0395479	0.855872	0.99	7.25729e-06	0.036918	0.340289	0.99	0.688036	0.201625	0.0456679	2.0867	FALSE
HAS1	4		0.0836686	0	0.258007	1	2.42863e-10	0	2.32811	1	0.129975	0.226085	0.764805	0.92	1		0.256681		0.519077	0.193131	0.0925895	2.28047	FALSE
HAPLN3	2		0.00318352	0	1.06329	1	6.22544e-12	0	2.92466	1	0.53757		0.620658		0.146724	0.0947818	0.907419	0.97	0.671038	0.184057	0.0826898	3.2829	FALSE
HADHA	35		0.00361661	0	0.618121	1	0	0	4.01427	1	9.59793e-05	0.294982	0.807548	0.89	0.0733094	0.036918	0.497327	0.99	0.654838	0.0882167	0.0521438	4.0699	TRUE
H3-3B	62		0	0	0.36074	1	1		0.231459		0	0	1.88469	1	1		0.310269		0.143821	0.10016	0.0779006	0.112555	FALSE
GZMB	10		0	0	0.549462	1	0	0	2.47415	1	0	0	1.06675	1	0.03098	0	0.17936	1	0.835314	0.12621	0.0194761	2.18982	FALSE
GZMA	12		0.00139007	0	0.628278	1	0.00483155	0	1.78863	1	0.185887	0	0.351447	1	0.31187		0.247794		0.683943	0.152571	0.100284	0.398995	FALSE
GUSB	28		0	0	0.963397	1	0	0	2.99875	1	2.24843e-15	0	3.44488	1	1		0.311186		0.438889	0.256153	0.104535	6.13216	FALSE
GUSBP11	8		1.54942e-12	0	1.57141	1	4.52324e-12	0	1.80453	1	0.692726		0.549202		1		0.44698		0.256342	0.141363	0.122513	2.2734	FALSE
GUK1	46		0.00108187	0	0.488222	1	0	0	3.75924	1	0	0	1.78303	1	0	0	1.19697	1	0.641976	0.179445	0.0687179	3.68746	TRUE
HNRNPH1	25		0	0	0.879584	1	0	0	1.99624	1	0	0	1.51731	1	0.00182565	0	0.626917	1	0.430493	0.221357	0.115094	4.06659	FALSE
ITGB4	7		0.000351142	0	0.532905	1	0	0	2.20009	1	0.000882642	0.101705	1.58332	0.97	1		0.191259		0.443825	0.287136	0.0745285	2.19719	FALSE
IVNS1ABP	28		0.00223481	0	0.677248	1	0	0	3.66036	1	0	0	2.02902	1	1		0.481217		0.649283	0.211734	0.049625	7.08394	TRUE
JMJD1C	33		0.0500466	0	0.765609	1	1.03642e-14	0	1.90936	1	1		0.814374		0.0218486	0	0.863036	1	0.236057	0.221019	0.133849	2.20603	FALSE
LUC7L	24		9.99957e-10	0	0.762487	1	2.98751e-11	0	2.84923	1	0	0	2.17054	1	0.0172171	0.0947818	0.768305	0.97	0.396298	0.247911	0.124429	2.74503	FALSE
LUC7L3	47		0.000525271	0	0.626255	1	0	0	3.00608	1	1		1.51023		3.39116e-09	0.145669	0.791632	0.95	0.599499	0.134171	0.0969936	6.28516	FALSE
LSR	14		1.27142e-06	0	0.369182	1	1.50008e-14	0.0390774	2.1284	0.99	3.22156e-07	0	1.22007	1	0.0038652	0	0.612432	1	0.535532	0.19898	0.0829939	4.67794	FALSE
LSP1	34		0	0	2.075	1	0	0	3.69358	1	0	0	3.50627	1	0	0	1.1614	1	0.481344	0.229274	0.0518841	4.52461	TRUE
LRTOMT	33		2.17503e-08	0	0.906805	1	0.000898934	0.228154	1.59304	0.92	1.32401e-08	0	0.429105	1	1		0.0185247		0.393199	0.256292	0.14504	1.66222	FALSE
LRRFIP1	39		0.0355288	0	0.9679	1	0	0	2.92901	1	0	0	1.47124	1	1		1.32832		0.569947	0.0979482	0.0931583	2.95121	FALSE
LRRC75B	2		4.209e-06	0	1.127	1	3.77023e-05	0.0390774	1.30205	0.99	0.178054	0.796422	0.616868	0.62	0.000399952	0	0.494943	1	0.526197	0.250015	0.120974	1.61567	FALSE
LRMDA	5		3.60941e-08	0	0.519336	1	0	0	1.16449	1	0	0	1.53051	1	0.390308		0.288422		0.432555	0.234895	0.0745023	3.57886	FALSE
LUM	4		3.50905e-07	0	0.269805	1	1		1.41023		1		0.224359		1		0.0167168		0.71247	0.183562	0.098347	1.03358	FALSE
LRIF1	31		0	0	3.45747	1	0	0	3.66341	1	0	0	1.37216	1	0.000732682	0	0.383161	1	0.498022	0.198491	0.080925	4.77376	TRUE
LPXN	10		0.00183037	0	0.586111	1	1.03642e-14	0	3.42889	1	1		0.186562		1		0.10496		0.687193	0.145971	0.054798	3.66701	FALSE
LPIN1	13		0.106309	0	0.718752	1	0.00649311	0.339201	1.8449	0.87	7.84745e-07	0.071989	1.07157	0.98	1		0.234551		0.518747	0.259174	0.0773997	4.17181	FALSE
LPCAT2	3		0.00082079	0	0.869842	1	4.96617e-06	0.297339	2.95007	0.89	0.0129313	0.128391	0.775273	0.96	1		0.304256		0.500908	0.177688	0.102025	2.13642	FALSE
LOC112267867	15		0	0	1.37629	1	0	0	1.12977	1	1		0.0171631		1		0.136293		0.43102	0.11384	0.070524	2.12826	FALSE
LOC107985034	21		0	0	1.71514	1	0	0	1.64966	1	1.44472e-06	0	0.311642	1	1		0.131385		0.507907	0.262305	0.212819	1.58162	FALSE
LOC107984950	3		0.0021285	0	1.09128	1	0.0192678	0.964632	1.02886	0.48	1		0.00184824		1		0.0169014		0.749559	0.239674	0.0107669	2.84479	FALSE
LOC107984079	10		2.08728e-10	0	0.980063	1	1		0.564124		0.0220779	0	0.57788	1	1.69636e-07	0	0.65504	1	0.38472	0.255022	0.134304	2.11967	FALSE
LOC105379154	25		0.00230089	0	1.13518	1	0	0	2.63827	1	1		0.0942711		0.122035	0.145669	0.71061	0.95	0.675347	0.0903666	0.0861201	9.18987	FALSE
LRCH4	6		0	0	1.82016	1	0	0	1.87659	1	0	0	1.30112	1	1		0.0929117		0.515326	0.229791	0.0935814	2.91499	FALSE
LXN	12		1.07647e-09	0	1.06909	1	1		0.126388		0.0124042	0	1.37501	1	0.00218135	0	0.521721	1	0.725646	0.261762	0.0125925	0.576864	FALSE
LYAR	19		0	0	0.757402	1	0	0	2.51554	1	1.72074e-08	0	1.5038	1	0	0	0.736694	1	0.515712	0.333874	0.0721502	4.23947	FALSE
LYRM4	14		0.00754922	0	0.799857	1	5.35807e-09	0	2.28211	1	1		0.563721		1		0.235862		0.517993	0.246807	0.131645	4.43085	FALSE
MED17	10		2.49573e-05	0	0.976137	1	5.20091e-08	0.101965	2.48792	0.97	0.782406		0.391756		1.19827e-05	0	0.604651	1	0.514813	0.162781	0.123469	3.1799	FALSE
MDM4	19		0.000108218	0	0.452158	1	5.21408e-11	0.101965	2.55921	0.97	6.35591e-09	0.0395479	1.33543	0.99	1		0.659011		0.449347	0.311844	0.134712	2.96951	FALSE
MDK	12		0.177056	0	0.264279	1	8.01484e-05	0.129398	1.12388	0.96	0	0	1.99448	1	0	0	1.60018	1	0.397724	0.36016	0.10526	1.70058	FALSE
MCL1	15		8.62134e-05	0	0.514502	1	1.0704e-12	0	1.33956	1	0.011689	0	0.408322	1	0.326235		0.240065		0.763447	0.0987119	0.0386616	2.63895	FALSE
MBTPS1	10		6.57034e-10	0	1.81703	1	0.170589		1.7315		1.01436e-11	0	1.69848	1	1.44662e-12	0	1.03567	1	0.530005	0.172055	0.0889343	4.30848	FALSE
MBNL1	37		1.15825e-07	0	0.505165	1	9.78242e-13	0	1.20014	1	2.04422e-09	0	0.815596	1	0.0869924	0.036918	0.83252	0.99	0.278534	0.153537	0.139355	2.67941	FALSE
MBD2	11		5.56999e-10	0	0.641957	1	0	0	2.50145	1	3.8457e-06	0.071989	0.664573	0.98	5.39373e-06	0.0947818	0.335364	0.97	0.797282	0.104923	0.037745	3.13985	FALSE
MAST4	11		6.47255e-05	0	1.22538	1	3.45118e-09	0.297339	1.6608	0.89	5.36512e-08	0	0.797155	1	1		0.33118		0.246549	0.189914	0.112256	2.06278	FALSE
MARS1	20		1.19123e-05	0	1.84625	1	0	0	3.94834	1	0	0	1.97698	1	1		0.261727		0.651117	0.151565	0.0689153	3.68802	TRUE
MARK3	15		0.00111014	0	0.660681	1	9.58039e-10	0.0390774	2.15414	0.99	0	0	1.70783	1	0.0222737	0.238805	0.618061	0.91	0.42585	0.184909	0.10286	4.19744	FALSE
MAP4K4	13		7.70043e-08	0	1.15769	1	0.00883857	0.0390774	1.61163	0.99	0.516061		1.1862		1		0.285653		0.291359	0.154306	0.0962352	3.49889	FALSE
MAP3K8	20		0	0	2.60231	1	0	0	2.25169	1	0	0	1.75337	1	0.27064	0.717945	0.700668	0.34	0.416812	0.201379	0.166503	4.14047	FALSE
MAP3K6	10		4.11234e-08	0	0.76385	1	2.26445e-05	0	1.98227	1	8.80354e-05	0.071989	0.785231	0.98	1		0.143426		0.511329	0.175495	0.0760679	2.01765	FALSE
MANF	9		2.50511e-11	0	1.08262	1	4.3754e-12	0	1.73283	1	6.14554e-08	0	0.538306	1	4.07208e-06	0	0.566026	1	0.837607	0.102791	0.0464013	2.8399	FALSE
MAN1A1	4		0.000190432	0	0.72564	1	0.00735419	0.0390774	1.05061	0.99	0.00503753	0	0.397333	1	0.00017379	0	1.11135	1	0.510626	0.116601	0.103082	1.82554	FALSE
MALL	8		0	0	3.19198	1	0	0	3.29633	1	1		0.0325931		1		0.18559		0.780991	0.120113	0.0708055	3.25445	FALSE
MAGOH	26		0.0243117	0	1.54862	1	0.00478597	0.0720952	2.21276	0.98	1		0.651173		1		0.0480581		0.924631	0.0441895	0.0152847	5.97149	FALSE
MACF1	31		5.39052e-05	0	0.709994	1	0.00345029	0.360216	2.14132	0.86	1		0.351063		0.0148539	0	0.523247	1	0.310749	0.120694	0.0906932	2.92492	FALSE
LYST	22		5.38352e-14	0	1.07528	1	9.95086e-13	0	1.52365	1	1		0.495309		1		0.239442		0.248987	0.156351	0.112552	2.45116	FALSE
LOC105378329	7		0.00157931	0	0.457818	1	1		1.812		1		0.252915		1		0.113414		0.705326	0.214962	0.0621398	1.03126	FALSE
LOC105377663	8		3.48547e-14	0	0.864293	1	0	0	1.84464	1	0	0	0.804623	1	1		0.315188		0.320635	0.20682	0.108793	1.72341	FALSE
LOC105377291	11		2.91776e-06	0	0.468218	1	0	0	1.75957	1	1		0.0942164		0.0251221	0.0947818	0.623835	0.97	0.471358	0.161379	0.159034	2.38256	FALSE
LOC105376392	39		0	0	2.34624	1	0	0	2.44895	1	0	0	1.61187	1	1		0.0701018		0.768726	0.145568	0.038908	3.85303	FALSE
LAMP2	22		0.00526007	0	0.580919	1	0	0	3.22599	1	5.04414e-12	0	2.50933	1	0.000748264	0	0.51337	1	0.747345	0.183978	0.0318929	3.96324	FALSE
LACTB2	9		5.59685e-07	0	1.17058	1	0.0274406	0.339201	1.23431	0.87	0.00312014	0.226085	0.823528	0.92	1.71038e-07	0.566994	0.409265	0.74	0.549523	0.219976	0.103117	2.05998	FALSE
L3HYPDH	17		0	0	0.544419	1	4.67056e-14	0	2.42595	1	5.9723e-05	0	1.08648	1	0.0292558	0	0.632785	1	0.299824	0.150789	0.137179	1.42153	FALSE
KTN1	43		0	0	1.93356	1	0	0	1.96471	1	0	0	0.630693	1	1		0.0914483		0.420374	0.140323	0.0997883	3.56713	FALSE
KRTCAP3	9		0.00443656	0	1.54673	1	0	0	2.70575	1	0	0	1.97394	1	1		0.194612		0.397042	0.286442	0.169892	2.65324	FALSE
KMT2C	19		9.20605e-11	0	1.00245	1	0.255295		0.940613		1		0.282688		0.0184739	0	0.573632	1	0.23563	0.178746	0.122858	2.71551	FALSE
KLRG1	25		6.81872e-13	0	1.89566	1	0	0	5.59112	1	0	0	3.44568	1	4.56997e-07	0	2.53023	1	0.275062	0.229548	0.0872734	9.30372	TRUE
KLHL28	13		0.0270278	0	0.7571	1	0	0	2.54643	1	1		0.284827		0.865537		0.596093		0.662759	0.141449	0.077921	2.21152	FALSE
KLF6	48		0.000406106	0	0.918915	1	0	0	2.35422	1	5.47062e-07	0	1.67417	1	1		0.0800529		0.754541	0.150293	0.0229413	2.78532	FALSE
KLF10	18		0.0407604	0	1.12208	1	1		2.21804		1		0.816329		1		0.17332		0.832031	0.06337	0.0367507	1.70722	FALSE
KIN	13		2.71232e-07	0	0.764122	1	0	0	2.41931	1	2.15418e-06	0	2.02942	1	4.19355e-09	0	0.980182	1	0.522363	0.206555	0.118398	3.07948	FALSE
KIF22	14		0	0	1.35269	1	1.7465e-06	0	3.2456	1	0	0	1.28141	1	1		0.159893		0.690447	0.204868	0.0421676	2.63365	FALSE
KIAA1324	5		0.039016	0	0.330533	1	0	0	4.23288	1	2.47973e-10	0	0.765295	1	1		0.0142582		0.664294	0.126841	0.0526304	3.40411	TRUE
KIAA1191	10		0.152908	0	0.522429	1	0	0	2.05486	1	0.80695		1.20213		1		1.0514		0.376256	0.232815	0.148049	7.62	FALSE
KDSR	12		0.0154787	0	0.744006	1	0	0	3.86197	1	0.000569121	0.071989	1.38498	0.98	0.278072	0.0947818	0.772582	0.97	0.795031	0.118909	0.0440575	3.43323	TRUE
KDM7A	9		1.73522e-09	0	1.16961	1	1.05856e-05	0.274691	3.71375	0.9	3.65052e-11	0	1.39432	1	1		0.425744		0.602996	0.108953	0.078209	4.49655	FALSE
KALRN	2		0.00570432	0	1.10886	1	1.98791e-10	0	1.37623	1	0.00818068	0	0.597685	1	0.00370276	0	0.732564	1	0.210326	0.139647	0.0966159	1.19517	FALSE
JPT1	28		0	0	1.2252	1	0	0.228154	2.08048	0.92	8.68855e-15	0.15545	0.7177	0.95	0.0542081	0	0.816875	1	0.623507	0.226619	0.119662	1.51356	FALSE
JMJD8	26		0.00676222	0	0.562285	1	1		0.217295		1.38017e-11	0.071989	1.69775	0.98	1		0.287122		0.451288	0.18863	0.155704	5.27996	FALSE
LAMTOR3	17		0.000194364	0	0.531923	1	0	0	3.37649	1	8.43748e-11	0	2.08635	1	1		0.108492		0.787759	0.130112	0.0254983	6.46839	FALSE
MEDAG	4		0	0	1.56751	1	0.662336		0.947284		0	0	0.897273	1	5.99086e-05	0	1.36836	1	0.396548	0.193882	0.167795	2.24928	FALSE
LAP3	23		0.159721	0	0.273378	1	0	0	4.32168	1	1		0.376381		1		0.232402		0.826025	0.056138	0.0517771	6.4521	TRUE
LCP1	25		0.0015154	0	1.1446	1	0	0	3.75973	1	1		0.168068		1		0.393267		0.774762	0.0722882	0.0309536	3.57048	TRUE
LOC105375545	43		0.11054	0	0.751936	1	0	0	3.28877	1	0	0	1.15088	1	1		0.195454		0.771518	0.0868293	0.0459285	2.86135	FALSE
LOC105373194	21		9.95041e-10	0	0.783788	1	0.0686609	0.252424	1.15805	0.91	1		0.232249		0	0	0.812083	1	0.491457	0.280476	0.120804	2.64454	FALSE
LOC105372437	6		0	0	4.07393	1	0	0	5.71112	1	3.73637e-06	0	0.824159	1	1.64729e-10	0	1.36798	1	0.396129	0.169403	0.0875145	5.93195	TRUE
LOC105370217	6		1.0257e-06	0	0.554945	1	5.52452e-06	0	0.45311	1	1		1.59689e-17		1		3.53302e-19		1	3.39089e-33	2.54613e-33	1.24411	FALSE
LOC105369421	21		0.00661988	0	1.40486	1	1		1.98939		0.00288865	0	0.770403	1	1		0.00385242		0.900144	0.0807926	0.0070972	4.16424	FALSE
LOC102724814	17		0.00103758	0	1.17146	1	0	0	2.53737	1	0.370952		0.698311		1		0.617518		0.341614	0.149403	0.123164	2.25729	FALSE
LOC101929512	13		0.00606518	0	1.02389	1	1.02502e-05	0	1.39645	1	1		0.19911		0.562709		0.538156		0.723108	0.244602	0.0322904	1.78448	FALSE
LOC101928100	14		2.14736e-13	0	8.61197	1	3.21529e-06	0	9.57418	1	1		0.529157		1		0.236074		0.443534	0.273957	0.117646	14.4159	TRUE
LOC101448202	3		0.00229931	0	0.781306	1	1.27663e-06	0.0390774	1.21695	0.99	1		0.384331		1		0.0761426		0.480347	0.241501	0.180893	1.37186	FALSE
LOC100507053	7		0.0138291	0	2.04395	1	0.108144		1.02516		1		0.056961		1		0.471229		0.239341	0.166017	0.126298	1.72186	FALSE
LOC100130701	4		1.09516e-05	0	0.861089	1	0	0	3.98453	1	7.62593e-14	0	1.17086	1	0.314229		0.24705		0.513425	0.170806	0.0649258	3.76485	TRUE
LMO7	7		0.00010837	0	1.09185	1	1.65667e-10	0	1.25186	1	0	0	2.18975	1	2.66222e-13	0	1.16766	1	0.298664	0.176822	0.103438	2.53212	FALSE
LINC01133	3		4.10173e-10	0	1.35508	1	0.0156571	0.423032	0.766486	0.83	0.791598		0.315649		1		0.129845		0.480708	0.282226	0.168635	1.83079	FALSE
LINC00861	8		1.52093e-09	0	1.39059	1	0.00273066	0	0.852546	1	1.08122e-08	0.180137	0.816876	0.94	1		0.235022		0.553805	0.260507	0.0936254	2.02958	FALSE
LIMS1	17		9.01215e-06	0	0.636525	1	0	0.0390774	2.59939	0.99	0	0	1.57585	1	0.518055		0.304452		0.555872	0.21757	0.0590595	3.60259	FALSE
LIMCH1	10		0	0	0.541358	1	1.40436e-10	0.252424	3.37146	0.91	0	0	2.26362	1	0.873318		0.524337		0.460374	0.231386	0.0733263	3.22326	FALSE
LGALS9	13		0.00130501	0	0.870402	1	2.7251e-07	0	2.47551	1	2.24843e-15	0	0.843063	1	0	0	0.641178	1	0.623689	0.149115	0.10578	4.24962	FALSE
LGALS3	28		0.00611071	0	0.772487	1	0	0	1.97638	1	1		0.471956		0.633477		1.61694		0.37166	0.238894	0.130592	3.28187	FALSE
LDHB	40		3.18598e-08	0	0.616112	1	0.955042		2.35806		1		0.01955		1		0.0161115		0.639501	0.0870602	0.0745176	1.51136	FALSE
LAPTM5	27		0.0026996	0	0.49726	1	0.326934		3.5161		1		0.0474154		1		0.0776502		0.849099	0.0381724	0.0315903	3.47495	FALSE
PSMG1	10		0.0621129	0	0.465102	1	1.05504e-08	0	2.44819	1	1		0.417046		1		0.0795655		0.680887	0.178174	0.0512588	5.35198	FALSE
PTGR1	14		0.0940879	0	0.224517	1	0	0	2.52939	1	0	0	2.50587	1	1		1.27423		0.314005	0.308276	0.231105	2.96648	FALSE
PTOV1	14		9.03729e-14	0	1.80326	1	0.000129281	0.101965	2.34707	0.97	2.94119e-14	0.0395479	1.00096	0.99	6.00259e-09	0	0.564901	1	0.512044	0.168229	0.123331	2.595	FALSE
TMEM176A	9		5.50305e-10	0	0.812531	1	0	0	2.49306	1	4.08392e-07	0	1.27152	1	0.0579731	0.0947818	0.582657	0.97	0.53501	0.300479	0.123422	3.10297	FALSE
TMEM131	9		1.38921e-06	0	1.18348	1	0.00144252	0.318936	1.35952	0.88	0.621582		0.428267		0.0170078	0.145669	0.613769	0.95	0.315047	0.133605	0.119859	3.13896	FALSE
TMEM11	18		0	0	1.23862	1	0	0	2.17178	1	1		0.0525085		1		0.0577517		0.977165	0.011973	0.00510104	3.43657	FALSE
TMC6	14		0.00339384	0	1.23334	1	0.017179	0.836835	1.89381	0.6	1		0.373736		0.0234156	0.036918	0.710802	0.99	0.436717	0.169139	0.0949447	2.95009	FALSE
TMBIM6	50		1.96286e-11	0	0.689645	1	0	0	4.08839	1	0.000317013	0	0.276916	1	1		0.214631		0.837277	0.0445702	0.0359865	4.02816	TRUE
TLN1	40		0.00623798	0	0.50434	1	0	0	3.35574	1	1.43194e-07	0	0.799794	1	1		0.387154		0.682439	0.115506	0.0785574	3.88801	FALSE
TKT	20		0	0	0.856421	1	0	0	3.76834	1	0.00403501	0.762421	0.399697	0.64	6.11165e-09	0.0947818	0.527691	0.97	0.722225	0.0782673	0.0347111	3.61905	TRUE
TKFC	14		5.37099e-13	0	0.959816	1	0	0	2.55634	1	1.20939e-09	0	1.32464	1	0	0	1.53273	1	0.526933	0.146241	0.132472	4.62928	FALSE
TMEM219	36		0	0	1.31841	1	0	0	2.86721	1	0	0	2.36731	1	0	0	1.02424	1	0.613775	0.267318	0.0788273	2.56502	FALSE
TIMP3	17		3.64655e-09	0	0.382008	1	0	0	2.17232	1	0.403068		0.682613		1		0.394446		0.101147	0.0742924	0.0501328	6.5663	FALSE
THUMPD3-AS1	13		0	0	0.982874	1	1		0.869624		0	0	1.16709	1	1		0.066529		0.426677	0.259087	0.0975001	2.85859	FALSE
THRAP3	30		9.68754e-08	0	1.5866	1	0	0	2.66165	1	0	0	1.14755	1	1		0.23305		0.558249	0.189541	0.078795	3.70685	FALSE
THOC7	15		0.000408957	0	1.14239	1	0.0133383	0.612139	1.58974	0.73	1		0.166442		1		0.201432		0.53626	0.191665	0.0987827	2.74707	FALSE
THOC6	10		2.35271e-08	0	0.844536	1	0	0	2.45247	1	1		0.165026		1.08332e-05	0	0.774007	1	0.725448	0.123031	0.115962	2.31349	FALSE
THBS3	5		0.0211764	0	0.492677	1	1.40083e-13	0	2.05127	1	0.231526		0.463784		1		0.102528		0.449882	0.141204	0.1265	2.27263	FALSE
THBS1	11		6.63672e-10	0	0.69083	1	0	0	4.06284	1	0	0	1.64317	1	1		0.446508		0.700459	0.109762	0.0658914	4.61904	TRUE
TGFB1I1	8		0.0242625	0	0.323548	1	0	0	3.00354	1	1		0.166805		0	0	0.952678	1	0.574062	0.144592	0.0878718	2.19047	FALSE
TFPI	14		0	0	0.690937	1	0	0	2.31018	1	0	0	1.33682	1	0.857873		0.318031		0.423611	0.173324	0.095942	3.52655	FALSE
TIMP1	29		8.80779e-05	0	0.271088	1	0	0	2.46855	1	0	0	1.83786	1	0	0	0.371764	1	0.730338	0.151721	0.0373742	2.38823	FALSE
TMEM263	4		2.1101e-10	0	0.940521	1	1.29129e-12	0.180814	2.43902	0.94	0.00308423	0	0.990763	1	1		0.0801875		0.779795	0.153166	0.0368099	3.67275	FALSE
TMEM41A	14		0.00647844	0	0.488916	1	0	0.0390774	2.2913	0.99	1		0.239376		2.0798e-09	0.036918	0.752092	0.99	0.708772	0.126555	0.108086	4.47267	FALSE
TMEM59	51		0.0747395	0	0.535543	1	0	0	3.4471	1	0	0.0395479	1.07871	0.99	1		0.894867		0.683593	0.187627	0.055603	4.41238	FALSE
TRIM33	7		3.71758e-09	0	1.36051	1	7.47068e-08	0	1.56754	1	0.00816556	0.393477	1.60285	0.84	1		0.693525		0.385987	0.288276	0.126037	3.01166	FALSE
TRIM22	26		0	0	0.880364	1	0	0	2.88192	1	1		0.761961		0	0	1.3632	1	0.599275	0.130924	0.0979269	3.98338	FALSE
TRDMT1	2		0.0105997	0	0.905017	1	1		0.372036		1		0.497106		1		0.265053		0.450487	0.166245	0.113549	2.95981	FALSE
TPT1	65		0	0	0.284908	1	0	0	3.53486	1	0.0117671	0	0.626143	1	1		0.174634		0.883645	0.0498697	0.014736	3.37736	TRUE
TPR	41		0.0381456	0	0.455919	1	0.00757571	0.463795	3.15053	0.81	0.532386		0.662252		0.0423157	0.26036	0.569835	0.9	0.516983	0.148447	0.128826	3.88624	FALSE
TPRG1	5		5.45139e-06	0	0.952031	1	1.31872e-08	0.0720952	1.99329	0.98	1.41669e-10	0	0.978294	1	0.00742744	0.238805	0.52272	0.91	0.276223	0.170654	0.0996292	2.64006	FALSE
TPM1	26		0	0	1.16992	1	0	0	3.25421	1	0	0	2.443	1	0	0	1.58755	1	0.493575	0.247386	0.124333	4.68446	FALSE
TOMM34	6		0.0035143	0	1.2385	1	2.86491e-10	0	2.2192	1	0.0371451	0	1.59018	1	1		0.013862		0.812532	0.123476	0.0257437	3.27913	FALSE
TOB1	6		4.7361e-11	0	1.66511	1	0	0	1.60844	1	1		0.0244719		1		0.121409		0.427858	0.206971	0.162522	1.46173	FALSE
TNRC6B	28		7.78514e-10	0	0.495219	1	0	0	2.47843	1	1.7104e-14	0	1.3717	1	1		0.434304		0.390314	0.178858	0.139534	3.57832	FALSE
TNKS1BP1	6		8.22251e-09	0	0.559836	1	1.68136e-09	0.501711	0.753554	0.79	0.00155354	0.524344	0.678346	0.77	1		0.0749517		0.323876	0.249655	0.0999936	1.56212	FALSE
TNFSF13	8		1.28073e-07	0	0.490422	1	2.74635e-10	0	1.68853	1	1		0.268534		0.261384	0.036918	0.359146	0.99	0.459123	0.205928	0.169655	3.13488	FALSE
TNFRSF12A	12		4.10657e-15	0	1.85706	1	0	0	4.09611	1	1		0.0876235		1		0.725575		0.669575	0.0814445	0.0484833	5.90783	TRUE
TNFRSF10A	6		7.55571e-05	0	0.907713	1	0.711248		2.01178		1.71314e-11	0.0395479	1.38632	0.99	1		0.118202		0.645542	0.207919	0.0524006	2.82532	FALSE
TNFAIP6	5		0.00112091	0	0.650393	1	3.39011e-05	0	1.78463	1	7.23199e-05	0.0395479	0.464295	0.99	0.000734752	0.962892	0.260071	0.48	0.73498	0.108055	0.0505116	0.205139	FALSE
TNC	3		0.140138	0	0.657857	1	1		1.17407		0.521281		0.512		1		0.267597		0.33596	0.231841	0.117445	1.79485	FALSE
TMSB10	63		4.23764e-06	0	0.202093	1	0.00126102	0	0.379395	1	0	0	1.44442	1	1		0.0823307		0.170645	0.155728	0.147698	2.0664	FALSE
TMF1	27		0.104448	0	0.913497	1	3.00465e-06	0.0720952	1.82551	0.98	1		0.833628		1.63886e-12	0.036918	0.960538	0.99	0.390156	0.202813	0.117422	1.41453	FALSE
TMEM63A	9		0	0	1.44853	1	8.01408e-07	0	2.31578	1	1		0.64033		1		0.415572		0.455037	0.101906	0.0854292	4.13358	FALSE
TFEB	3		0.18334	0	0.417224	1	0.513419		2.08787		1		0.541468		1		0.0287366		0.611526	0.158667	0.0770698	1.5071	FALSE
TRIP10	14		1.88266e-11	0	0.880841	1	0	0	3.16407	1	1		0.494012		6.72551e-06	0	0.816416	1	0.603199	0.201928	0.075101	3.55285	FALSE
TEX26-AS1	4		0.000291048	0	1.40324	1	0	0	4.11603	1	1		0.0725686		0.411222		0.194262		0.665074	0.1034	0.0842338	4.11125	TRUE
TCP1	36		1.34198e-07	0	0.494822	1	0	0	4.86261	1	6.49071e-08	0	0.991865	1	1		0.316507		0.815731	0.0712716	0.0344378	4.77105	TRUE
STX4	7		0.013216	0	0.530974	1	1.04973e-08	0.0390774	2.5998	0.99	1		0.419615		1		0.434975		0.5398	0.234489	0.0708765	3.27773	FALSE
STRBP	4		0.0199952	0	0.719929	1	1.87996e-12	0	3.1367	1	0.101153	0.128391	0.906613	0.96	1		0.353158		0.543248	0.194618	0.104038	4.31615	FALSE
STOML2	23		1.31788e-09	0	0.998949	1	0	0	2.56581	1	1		0.209271		0.126147	0.036918	0.550212	0.99	0.52885	0.113926	0.0889165	2.15397	FALSE
STIMATE-MUSTN1	5		4.19529e-10	0	3.01731	1	9.92034e-11	0	2.87689	1	1		0.000955958		1		0.00455308		0.956741	0.0276066	0.0156522	3.19288	FALSE
STAT4	18		8.86434e-05	0	0.861394	1	0	0	4.20223	1	2.24843e-15	0.15545	1.70684	0.95	0.134739	0.036918	0.591804	0.99	0.680109	0.118516	0.0542447	3.75697	TRUE
STAT1	10		0.0168002	0	0.457547	1	0.00621061	0.180814	2.70604	0.94	0.000432731	0.180137	0.697908	0.94	1		0.461971		0.586424	0.162031	0.0621298	5.15369	FALSE
STARD3NL	18		0.0252671	0	0.389825	1	0	0	3.82559	1	3.38626e-05	0	1.68848	1	0	0	1.18146	1	0.652902	0.202702	0.0600854	5.21244	TRUE
ST6GALNAC6	6		0.122773	0	0.424342	1	0	0	2.86253	1	0	0	2.04528	1	0.0423157	0.643686	0.57637	0.7	0.301575	0.290322	0.15366	3.31665	FALSE
STXBP2	12		0	0	0.77023	1	0	0	3.93782	1	0	0	1.065	1	1		0.383583		0.685989	0.0870477	0.0591885	4.93345	TRUE
ST6GALNAC1	5		6.30491e-05	0	1.29329	1	0.0015318	0.483249	2.08798	0.8	0.0304586	0.101705	0.660648	0.97	1		0.486964		0.566923	0.201255	0.0685365	3.27462	FALSE
ST20-MTHFS	18		1.05755e-07	0	0.590221	1	0	0.0720952	2.0125	0.98	0	0	1.52747	1	1		0.213215		0.498887	0.356152	0.0874591	3.32576	FALSE
SSPN	11		2.02853e-12	0	1.01533	1	0	0	1.72391	1	0.00132763	0	1.2459	1	0	0	1.04783	1	0.430476	0.168968	0.136617	3.16576	FALSE
SSH2	14		1.76286e-10	0	0.74083	1	0	0	2.02248	1	0	0	1.65605	1	0	0	1.14529	1	0.393085	0.179341	0.0818014	4.02553	FALSE
SSB	42		0.0549592	0	0.421115	1	0	0	2.81227	1	1.7104e-14	0	0.909064	1	0	0	1.21022	1	0.552078	0.191525	0.0763532	4.69758	FALSE
SSBP4	6		2.88854e-06	0	1.16006	1	0.693016		1.531		0.00403193	0.15545	0.860955	0.95	2.15785e-06	0	0.776757	1	0.50594	0.222022	0.0962215	3.89886	FALSE
SRSF7	48		0	0	0.636624	1	0	0	2.92181	1	0	0	2.25702	1	0.00549653	0	1.7596	1	0.378843	0.308028	0.174154	4.98406	FALSE
SRSF5	52		0	0	1.07526	1	0	0	2.94417	1	0	0	2.86709	1	0	0	0.653604	1	0.673479	0.165878	0.078445	5.31567	FALSE
SRSF4	19		8.83949e-07	0	1.23178	1	0	0	3.2099	1	7.4339e-14	0	1.30623	1	1		0.578964		0.638113	0.160429	0.0826688	3.16727	FALSE
ST3GAL3	3		0.0568786	0	0.341793	1	0.122162		1.43396		0.710464		0.347771		0.356202		0.44644		0.410295	0.133578	0.102162	3.66673	FALSE
SULF1	9		2.63686e-05	0	0.751531	1	0.000102868	0	2.03134	1	5.17649e-05	0.15545	1.9985	0.95	0.116757	0.530677	0.822878	0.76	0.391833	0.259106	0.123268	0.713831	FALSE
SULT1A1	16		0.000917327	0	0.79504	1	0	0	2.71115	1	9.10449e-13	0	0.618765	1	1		0.0904405		0.617884	0.186488	0.0584003	3.63433	FALSE
SUMF2	10		0.115619	0	0.622127	1	2.90158e-10	0.129398	3.39563	0.96	1		0.596463		1		0.0503305		0.725525	0.137684	0.0516823	3.23789	FALSE
TCIRG1	21		0	0	0.613711	1	0	0	3.05257	1	1		1.07308		0.998549		0.512145		0.524935	0.156679	0.0664509	5.05388	FALSE
TCF25	33		0	0	1.78427	1	5.06514e-10	0	3.58787	1	0	0	1.45632	1	1		0.548493		0.549154	0.202544	0.0947861	3.16857	TRUE
TCEAL8	15		0	0	1.37654	1	0	0	1.38742	1	0	0	0.417245	1	1		1.56704e-15		0.916137	0.0838635	6.49133e-31	2.91611	FALSE
TBXAS1	9		0	0	1.14471	1	0	0	3.4994	1	1.42387e-13	0	1.39159	1	1		0.0122749		0.543709	0.159948	0.0487618	3.8334	FALSE
TBRG1	27		0.00101151	0	0.734018	1	2.7532e-09	0	2.86726	1	2.97192e-05	0.0395479	1.25452	0.99	1.10801e-09	0	0.787415	1	0.494371	0.272689	0.0740076	4.49412	FALSE
TBL1XR1	11		0.01913	0	0.651075	1	1		1.7457		0.779934		1.1899		1		0.294483		0.50318	0.164714	0.103006	3.09351	FALSE
TBC1D23	6		0.00301354	0	0.45396	1	7.66367e-15	0	2.5226	1	2.03165e-13	0	2.58239	1	1		0.330797		0.495781	0.287853	0.0629944	3.61684	FALSE
TASOR2	4		0.00415598	0	0.698281	1	1.23623e-06	0.665217	1.58111	0.7	1		0.0376122		1		0.0218526		0.311667	0.197305	0.0877651	1.58864	FALSE
TARP	9		5.18469e-11	0	1.2037	1	1.21619e-07	0.297339	2.70441	0.11	0	0	1.36134	1	1.24244e-12	0	0.801611	1	0.502708	0.17577	0.0824101	3.90387	FALSE
TALDO1	32		0	0	1.21492	1	0	0	2.90946	1	0	0	0.758938	1	1		0.217807		0.813971	0.0616444	0.0533835	4.40947	FALSE
TAF10	38		0.0355699	0	0.69743	1	4.93693e-15	0	2.04472	1	1		0.769576		0.00706635	0.036918	0.648146	0.99	0.368383	0.221541	0.134788	5.85088	FALSE
TACC1	19		0.193975	0	0.439365	1	0	0	1.76075	1	0.0331178	0.0395479	0.810103	0.99	1		0.483961		0.347689	0.140026	0.127851	3.42549	FALSE
SZRD1	9		2.19417e-05	0	0.905627	1	0.000390193	0.180814	1.80803	0.94	6.58966e-06	0.356142	0.890985	0.14	1.99518e-05	0.036918	1.02449	0.99	0.425042	0.273181	0.209095	3.00328	FALSE
SYN3	12		0.00416974	0	1.30979	1	1		0.0150592		1		0.0615731		0.317855		0.493697		0.251437	0.110499	0.0618324	2.18784	FALSE
SYN1	28		0	0	0.53454	1	0	0	1.63963	1	1		0.059732		1		0.253342		0.447724	0.221278	0.104771	1.98263	FALSE
SWAP70	16		2.14997e-09	0	0.502264	1	0	0	4.10535	1	2.46454e-06	0	0.762029	1	0.000118552	0	0.665967	1	0.740878	0.0923354	0.0571871	3.79448	TRUE
SUSD2	3		0.0056134	0	0.677887	1	1.09509e-09	0.274691	1.61195	0.9	0.00694657	0.489378	0.539692	0.79	1		0.0643367		0.515917	0.276521	0.107014	2.5144	FALSE
SURF1	23		0.0822973	0	0.407643	1	0	0	3.48426	1	1		0.451986		1		0.0711567		0.747003	0.126529	0.0465955	7.39295	FALSE
SUMO1	38		0.00627519	0	0.536513	1	1		2.049		1		0.038542		1		0.0753234		0.717592	0.0889534	0.0563729	3.93425	FALSE
TECR	38		0	0	0.832248	1	0	0	4.40934	1	1		0.114293		0	0	1.54155	1	0.802068	0.0744487	0.0637025	4.59782	TRUE
TRIP12	14		0.00155172	0	3.16956	1	1		1.18109		2.30118e-07	0	1.19547	1	1		1.44358		0.360416	0.206016	0.15511	4.45809	FALSE
TRMT1	5		0.00295376	0	0.853393	1	0.00517008	0.594728	3.08326	0.74	1		0.185369		0.00893043	0	1.04701	1	0.532029	0.106773	0.0882277	3.75472	FALSE
TRPV2	5		7.35111e-05	0	0.896018	1	1.36065e-07	0.0390774	3.05922	0.99	1		0.703593		1.51145e-14	0	1.19945	1	0.474173	0.174338	0.129838	2.79844	FALSE
ZEB2	7		6.53407e-05	0	1.04979	1	1.34527e-05	0.0720952	1.68567	0.98	1		0.25067		0.0697818	0.26036	0.589003	0.9	0.452599	0.184642	0.111205	3.19606	FALSE
ZDHHC13	4		0.0255169	0	0.951259	1	0.000795147	0.339201	3.2298	0.87	0.00896506	0.101705	0.510306	0.97	0.00174859	0	1.34383	1	0.601773	0.122286	0.0767981	3.23964	FALSE
ZCRB1	25		0.00241685	0	1.00569	1	0.000319258	0	2.28995	1	0.0941868	0	0.92102	1	1		0.292362		0.883285	0.0830394	0.0307923	8.22986	FALSE
ZCCHC10	17		0.169619	0	0.376698	1	0	0	1.75412	1	1.11216e-11	0	1.87278	1	1.58891e-11	0.192327	1.36935	0.93	0.485787	0.221811	0.189836	3.52901	FALSE
ZC3H18	6		1.08453e-05	0	2.11434	1	1.2466e-07	0.0390774	1.59279	0.99	0.0522459	0.15545	1.34731	0.95	1		0.238279		0.364484	0.213359	0.132289	3.64758	FALSE
ZC3H13	29		4.50121e-05	0	1.00014	1	0.0691815	0.180814	1.50045	0.94	1		0.425917		0.952833		1.08478		0.247167	0.157153	0.118498	3.02902	FALSE
ZBTB20	23		7.10289e-08	0	0.576116	1	3.79294e-07	0	1.3639	1	1		0.436545		1		0.67616		0.170132	0.104726	0.101143	2.54873	FALSE
ZBTB16	17		0.000883955	0	0.781862	1	7.2792e-16	0	2.92044	1	7.18154e-07	0.071989	0.577199	0.98	0	0	0.74471	1	0.615237	0.0567292	0.0438574	2.87659	FALSE
ZFAND2B	17		0.00133415	0	0.815965	1	3.36953e-06	0.443938	3.47306	0.82	1.52355e-06	0.226085	1.41673	0.92	8.00774e-10	0.192327	1.14279	0.93	0.572793	0.194515	0.111274	2.86071	FALSE
ZAP70	12		7.24547e-12	0	1.57587	1	2.76272e-14	0	2.86449	1	0	0	1.11479	1	1		0.184478		0.699312	0.159135	0.094237	2.39282	FALSE
YTHDF3	6		8.03261e-08	0	0.583629	1	0	0	2.60368	1	0.00251756	0.203749	0.476097	0.93	0.0403496	0.26036	0.257271	0.9	0.822111	0.0627936	0.0397161	2.56362	FALSE
YTHDF2	27		0.00098633	0	0.221928	1	0	0	2.50236	1	1.54433e-07	0.101705	0.450241	0.97	0	0	0.70177	1	0.649041	0.195439	0.0595445	3.32203	FALSE
YPEL5	41		0	0	0.621563	1	0	0	1.97841	1	0	0	1.46906	1	1		0.519615		0.70081	0.142531	0.053391	3.86803	FALSE
YME1L1	22		0	0	1.66917	1	0	0	2.00688	1	3.11496e-13	0	1.25963	1	0.000310887	0	0.67218	1	0.454377	0.215708	0.0998649	2.5149	FALSE
YBX3	26		0	0	0.384676	1	0	0	3.24658	1	0	0	2.49993	1	0	0	0.931303	1	0.402956	0.355401	0.0565244	5.79376	FALSE
YBX1	43		0	0	0.549251	1	0	0	4.31232	1	1		0.0903061		1		0.0935096		0.745198	0.1133	0.0295008	7.15178	TRUE
YBEY	10		0.0188609	0	0.825741	1	1		0.903889		9.70062e-05	0	1.56876	1	1		0.399957		0.459252	0.384431	0.0676895	4.02143	FALSE
XRCC6	43		0	0	0.566651	1	0	0	4.09071	1	0	0	1.3079	1	0.368754		0.556069		0.785223	0.0665326	0.0428766	4.25634	TRUE
YWHAB	50		9.55387e-06	0	0.712883	1	0	0	2.50092	1	1		0.198132		1		0.232374		0.737659	0.175525	0.0587296	2.23569	FALSE
ZFAS1	42		0	0	0.471552	1	0	0	2.48957	1	0	0	1.93045	1	1		0.191001		0.523428	0.372894	0.0464837	3.82729	FALSE
ZMYM2	12		0.00405423	0	0.754488	1	1		0.855892		1		0.147368		1		0.481601		0.248061	0.207794	0.10831	2.39077	FALSE
ZNF207	29		0	0	0.616561	1	0	0	3.2764	1	3.0292e-11	0	2.33052	1	1		0.367462		0.5477	0.33618	0.0345859	5.08286	FALSE
unknown_chrM_0	10		0.00292338	0	0.679029	1	0.858685		0.896883		1		0.373433		1		0.172422		0.110641	0.0515499	0.0487495	1.57319	FALSE
unknown_chr7_KI270803v1_alt_800000	23		0	0	1.25146	1	0	0	1.22835	1	0.132712	0	0.389354	1	0	0	2.24142	1	0.490227	0.187496	0.178493	2.08073	FALSE
unknown_chr7_38300000	6		5.94534e-13	0	1.26956	1	0.0180081	0.402659	0.997138	0.84	0.0234997	0.101705	0.473364	0.97	1		0.354588		0.322346	0.113677	0.107283	1.52252	FALSE
unknown_chr6_GL000254v2_alt_2600000	56		0	0	1.0109	1	0	0	2.02498	1	0	0	1.86057	1	0.000582349	0	0.482535	1	0.366611	0.260658	0.145435	2.99644	FALSE
unknown_chr6_GL000251v2_alt_4400000	31		1.08485e-12	0	1.1636	1	0	0	2.3575	1	0.00525878	0	0.613233	1	1		0.171898		0.565561	0.0887357	0.0665512	1.64216	FALSE
unknown_chr6_GL000251v2_alt_2800000	54		0	0	0.710412	1	1		0.00456612		1		0.155714		1		0.019698		0.105474	0.0658913	0.0638882	0.610511	FALSE
unknown_chr6_GL000251v2_alt_2700000	43		0	0	2.85808	1	0	0	2.77836	1	3.2127e-05	0	0.398866	1	1		0.00586201		0.846377	0.0977638	0.0223244	5.55571	FALSE
unknown_chr2_89100000	3		0.00184103	0	5.39022	1	1		0.11932		0.0247976	0.071989	1.4055	0.98	1		0.0707475		0.322381	0.155235	0.0932858	8.65482	FALSE
unknown_chr22_KI270879v1_alt_200000	14		1.63422e-13	0	1.14884	1	0.543735		2.08142		0	0	1.16936	1	2.95723e-09	0	1.35292	1	0.360086	0.175547	0.122191	3.09153	FALSE
unknown_chr22_KI270734v1_random_100000	5		0	0	1.01498	1	0	0	1.96009	1	0	0	1.16061	1	1		0.106841		0.584993	0.308528	0.0472418	2.17895	FALSE
unknown_chr22_40200000	7		5.02388e-12	0	1.48588	1	1.15687e-13	0	2.10227	1	1		0.0397998		1		0.00412786		0.815214	0.172965	0.0118211	2.5146	FALSE
unknown_chr21_8800000	13		1.61382e-10	0	0.814706	1	1		1.59713		0	0	1.3222	1	0.0022803	0	0.37217	1	0.587943	0.220852	0.0799242	2.5816	FALSE
unknown_chr20_62100000	18		0	0	0.692846	1	1		0.604293		6.99394e-05	0	0.539888	1	0	0	0.371922	1	0.415386	0.360879	0.147806	1.78005	FALSE
unknown_chr20_35700000	28		0	0	1.19006	1	0	0	1.29799	1	1		0.0446132		1		0.117687		0.527973	0.132269	0.074114	2.44884	FALSE
unknown_chr1_173800000	11		0	0	1.10304	1	0.227584		1.13656		1		0.474915		4.43175e-14	0	0.654578	1	0.36525	0.247067	0.171416	1.00815	FALSE
unknown_chr14_GL000194v1_random_100000	6		2.24186e-10	0	1.69444	1	3.71748e-10	0	1.41074	1	0.33144		0.96218		1		0.326015		0.496554	0.427411	0.0760354	2.35724	FALSE
unknown_chr10_78000000	26		0	0	1.16009	1	0	0	0.956502	1	0	0	0.562425	1	4.24931e-05	0	0.447653	1	0.661807	0.189801	0.0708104	2.9662	FALSE
ZYX	23		0	0	0.763945	1	0	0	1.94443	1	2.19412e-06	0	4.19375	1	3.16146e-06	0	0.488889	1	0.378468	0.365512	0.0869563	4.10644	FALSE
ZNF217	3		2.76626e-06	0	1.62337	1	2.72755e-05	0.129398	1.3235	0.96	1		0.0658392		6.00694e-07	0	0.828582	1	0.472483	0.294909	0.113184	3.47942	FALSE
XBP1	35		0.00351187	0	0.545268	1	7.2792e-16	0	2.52051	1	0.0370897	0	0.468545	1	1		0.0156779		0.738933	0.0743584	0.0369035	4.89953	FALSE
WSB1	27		0.0007255	0	0.31931	1	0	0	3.78444	1	1.49913e-09	0	1.23532	1	1		0.731287		0.738055	0.119633	0.060587	3.57887	TRUE
WDR45B	16		6.29784e-12	0	0.856675	1	0	0	3.45101	1	1		0.0683098		1		0.0322707		0.742228	0.0905596	0.0652605	3.70944	FALSE
WDR1	36		3.84275e-12	0	0.916578	1	0	0	4.74349	1	2.04377e-12	0	0.623631	1	0.0020889	0.036918	1.02975	0.99	0.70393	0.0727358	0.0557515	4.64826	TRUE
UPF3A	27		0.0188371	0	0.652614	1	1.28015e-06	0	2.05321	1	3.44923e-08	0.710644	0.747765	0.67	1		0.211943		0.478602	0.141768	0.0739428	2.70707	FALSE
UNC93B1	3		1.20601e-08	0	1.57024	1	0	0	2.02927	1	0	0	1.56702	1	1		0.0880683		0.632443	0.150813	0.0752127	4.05132	FALSE
UGP2	22		7.14706e-08	0	0.572625	1	0	0	3.17514	1	0	0	1.11073	1	1.41549e-10	0	0.864893	1	0.649591	0.125208	0.090916	3.30393	FALSE
UFSP2	21		0	0	1.26149	1	0	0	2.40873	1	0	0	1.23013	1	1		0.238619		0.535463	0.157126	0.112141	2.97668	FALSE
UCP2	30		8.95017e-08	0	0.714129	1	0	0	3.24136	1	0.21802		0.272323		1		0.256894		0.834919	0.0497089	0.0284142	3.02329	FALSE
UBXN4	42		0.0464323	0	0.829265	1	0	0	3.43693	1	0.00915901	0	0.74892	1	0	0	1.73888	1	0.612578	0.185335	0.0787086	5.87114	FALSE
UBE2D2	41		0.0160499	0	0.435604	1	0	0	3.54755	1	0	0	1.01855	1	0	0.0678899	0.649656	0.98	0.799788	0.119964	0.0251688	5.75083	TRUE
UBAP2L	23		0.0261563	0	0.868416	1	1.27445e-09	0	3.03242	1	0.0467457	0.898141	0.990067	0.44	0.105239	0.238805	1.08132	0.91	0.300189	0.198904	0.104085	3.98037	FALSE
UBA52	60		0	0	0.318426	1	0	0	2.77473	1	0	0	2.44121	1	0	0	0.926894	1	0.471742	0.253851	0.0894175	5.70427	FALSE
UBA1	31		0.000152961	0	0.576246	1	7.7226e-13	0	1.94363	1	1.27457e-05	0	1.31231	1	1		0.261253		0.421688	0.175606	0.0847972	4.762	FALSE
UAP1	17		0	0	0.380642	1	0	0	3.66505	1	0	0	3.64227	1	1		0.218565		0.475599	0.370011	0.0479891	4.55309	TRUE
TYROBP	10		0.00198857	0	0.329117	1	4.52582e-07	0.101965	1.80019	0.97	1		0.268376		1		0.0888992		0.404151	0.221659	0.197201	2.47327	FALSE
TYMP	17		0	0	0.621888	1	0	0	2.91366	1	0	0	0.922512	1	1		0.407633		0.572524	0.124928	0.0853479	3.11563	FALSE
TUFM	37		0	0	0.630586	1	0	0	2.66453	1	1		0.19029		1		0.336839		0.807077	0.0972841	0.0338981	3.06315	FALSE
TUBG1	12		0	0	0.992657	1	0	0	2.66849	1	0	0	0.853534	1	0.807315		0.196972		0.731188	0.0523573	0.0485315	2.2979	FALSE
TTN-AS1	5		3.18882e-11	0	0.822006	1	0.00573479	0	0.861134	1	0.00279269	0	0.76418	1	1		0.273248		0.340746	0.135435	0.117751	2.73523	FALSE
TTC8	2		0.0718326	0	0.706289	1	1.05903e-08	0	2.44163	1	1		0.777515		5.54547e-05	0.170043	0.819856	0.94	0.531439	0.248221	0.149022	2.58177	FALSE
TSTD1	24		3.86358e-12	0	2.55749	1	1.21598e-11	0	2.5826	1	1		0.290953		1		0.000351432		0.896991	0.101605	0.00140425	3.38251	FALSE
TSPAN1	9		0.00278804	0	1.14515	1	0	0	2.58746	1	1		0.37757		0	0	1.72148	1	0.31598	0.21614	0.165404	2.4757	FALSE
UPP1	23		1.57526e-09	0	0.721118	1	0	0	2.53316	1	0	0	1.51931	1	1		0.543477		0.369568	0.245187	0.116456	3.47446	FALSE
SRSF3	54		0	0	0.692842	1	0	0	2.96071	1	0	0	1.61799	1	1		0.121991		0.755014	0.191337	0.0291825	5.52015	FALSE
UQCRB	54		8.55413e-07	0	0.576524	1	2.69867e-14	0	2.11705	1	1		0.374198		1		0.0118143		0.907656	0.0753975	0.00609776	1.67649	FALSE
USO1	8		0.000338111	0	0.59547	1	7.2792e-16	0	1.54973	1	0.00453941	0	0.728207	1	0.20475	0	0.537103	1	0.513195	0.179402	0.102489	3.03247	FALSE
WDR18	11		6.27312e-05	0	0.653233	1	0	0	3.28495	1	6.56886e-15	0	0.964107	1	1		0.178817		0.803019	0.102277	0.0270721	2.2844	FALSE
WBP11	17		0.0886765	0	0.658244	1	1		1.18899		1		0.32925		0.00372162	0.0947818	0.516111	0.97	0.40425	0.233762	0.13107	1.12884	FALSE
WASF2	31		1.28226e-07	0	0.913712	1	1		2.00045		4.02652e-08	0	0.853426	1	1		0.127695		0.482214	0.232896	0.116667	2.48931	FALSE
WARS1	19		2.8932e-06	0	0.33473	1	0	0	3.4095	1	0	0	3.18297	1	0.64451		0.388922		0.417207	0.307293	0.102819	5.79747	FALSE
VPS51	20		3.75105e-10	0	0.386211	1	0	0	3.67299	1	4.08337e-10	0	1.3119	1	1		0.203107		0.531726	0.102474	0.0752052	3.53001	TRUE
VPS33A	3		5.17898e-06	0	0.890081	1	0.00121042	0.155459	2.99101	0.95	0.00016092	0	1.28882	1	0.863157		0.281609		0.719906	0.137645	0.0468029	3.51904	FALSE
VPS29	42		0	0	0.735653	1	0	0	2.60565	1	0	0	1.87803	1	1		0.215716		0.591949	0.218365	0.0692991	4.71617	FALSE
VPS28	40		0.00211872	0	0.524861	1	0	0	3.82831	1	1		0.290006		1		0.0600437		0.793733	0.0926836	0.0440039	3.57381	TRUE
VIPR1-AS1	2		1.51562e-06	0	0.762779	1	1.3622e-05	0.0390774	1.05102	0.99	1		0.314743		1		0.0553272		0.792997	0.14259	0.0644138	2.11736	FALSE
VIM	44		0	0	1.02569	1	0	0	3.64071	1	0	0	0.845666	1	0.510391		0.180698		0.567348	0.0298383	0.0262139	2.04217	TRUE
VDAC2	36		2.70097e-05	0	0.445382	1	0	0	2.58585	1	1		0.152316		1		0.19676		0.849168	0.09108	0.0131197	4.45643	FALSE
VCP	33		7.11368e-06	0	0.286077	1	0	0	3.73167	1	0	0	1.52509	1	1		0.176965		0.700323	0.105392	0.0395111	4.97306	TRUE
VCAN	8		0	0	0.643263	1	0	0	2.20379	1	6.1463e-05	0	0.993934	1	1.49157e-06	0	0.83464	1	0.377497	0.237544	0.111537	1.19984	FALSE
VASP	7		0.0205845	0	0.483686	1	0.000402773	0.802722	1.91299	0.62	1		0.106062		1		0.125946		0.405431	0.150607	0.112353	4.52669	FALSE
UTP4	13		0.015715	0	0.46128	1	0	0	3.09659	1	1		0.511793		0.0210252	0.238805	0.466071	0.91	0.51694	0.30559	0.0725507	3.53409	FALSE
USP53	8		4.07189e-13	0	0.548056	1	2.79232e-07	0	1.15832	1	1		0.364922		4.88946e-07	0	0.41793	1	0.292091	0.20272	0.123024	2.78768	FALSE
USP36	20		1.0194e-06	0	0.667248	1	7.41714e-08	0	1.68509	1	1.45831e-11	0	0.779717	1	0.262806	0.47378	0.591567	0.79	0.396134	0.101512	0.0771872	4.29606	FALSE
USP13	3		0.0144425	0	0.394135	1	1		1.06014		0.00795294	0.203749	1.48894	0.93	1		0.315772		0.544094	0.138677	0.0838426	5.3731	FALSE
USP10	25		0	0	0.491558	1	0	0	3.15964	1	1.07516e-09	0	1.05595	1	1		0.194998		0.638986	0.140764	0.0941075	3.73756	FALSE
UQCRC2	32		3.36546e-05	0	0.864969	1	1		1.92417		0	0	1.73909	1	0.853265		0.228656		0.615573	0.252301	0.0343157	3.18253	FALSE
SRSF2	34		0	0	0.649106	1	0	0	1.65391	1	0.153532	0	0.622953	1	1		0.102704		0.830126	0.0967732	0.0311126	4.29435	FALSE
SRSF11	47		2.20639e-07	0	0.561157	1	0	0	2.60864	1	7.51386e-07	0	1.57787	1	1		0.670491		0.373374	0.199272	0.105085	3.00759	FALSE
SRRT	16		2.64111e-10	0	0.985969	1	0.255472		1.5744		8.64734e-05	0.0395479	1.1022	0.99	1		0.0706268		0.39821	0.188279	0.128796	2.7092	FALSE
RPL3	64		0	0	0.583648	1	0	0	3.4191	1	1		0.143459		1		0.288902		0.698029	0.0434025	0.0332069	3.38195	FALSE
RPL38	58		2.34872e-14	0	0.414932	1	1		1.9254		1		0.203446		1		0.0345654		0.767133	0.126797	0.079737	0.765431	FALSE
RPL37	64		0	0	0.527102	1	1		2.20033		1		0.157124		1		0.0180753		0.764164	0.156315	0.0270091	2.07027	FALSE
RPL37A	63		3.4889e-06	0	0.244174	1	1		2.1438		1		1.20831		1		0.842252		0.547928	0.374178	0.0325687	6.53933	FALSE
RPL36	60		5.48297e-07	0	0.332613	1	1		0.213101		1		2.2866		1		0.0274419		0.564812	0.192083	0.0760404	34.2238	FALSE
RPL35	62		2.5241e-06	0	0.73232	1	1		2.36521		1		0.0696935		1		0.630885		0.926374	0.0183381	0.0148181	1.84954	FALSE
RPL32	62		1.46897e-07	0	0.216714	1	1		2.40291		1		0.048567		1		0.0593395		0.788235	0.0836284	0.0593773	1.61832	FALSE
RPL28	60		0	0	0.69587	1	0	0	2.01863	1	1		0.062354		1		0.0578804		0.632986	0.149342	0.106339	2.67652	FALSE
RPL4	59		0	0	0.697979	1	0	0	3.86822	1	1		0.0902509		0	0	1.29972	1	0.760853	0.0408121	0.0299511	3.05158	TRUE
RPL27A	64		0	0	1.01804	1	0	0	2.28163	1	1		0.0196755		0	0	0.535209	1	0.846818	0.0370036	0.015676	1.81499	FALSE
RPL23	65		0.180604	0	0.410313	1	1		0.100237		1		1.8851		1		0.0049226		0.447088	0.211457	0.0684264	10.0558	FALSE
RPL23A	66		0	0	0.476118	1	0	0	2.21424	1	1		0.0285482		0	0	0.178278	1	0.320686	0.08569	0.0837419	1.06154	FALSE
RPL22L1	25		0	0	0.59057	1	0	0	2.44508	1	0	0	1.64134	1	1		0.423956		0.522072	0.371004	0.0541955	1.93749	FALSE
RPL18	60		0	0	0.858093	1	0.75612		2.56072		1		0.0485817		1		0.028117		0.317877	0.0818709	0.0751828	1.30926	FALSE
RPL17	63		0	0	0.372034	1	0	0	3.9007	1	0	0	1.13035	1	0	0	0.530667	1	0.774952	0.113045	0.0502762	3.8955	TRUE
RPL15	60		4.24491e-14	0	0.184755	1	1		2.33997		1		0.0350226		1		0.0289806		0.722959	0.0498872	0.0316945	2.06489	FALSE
RPL11	60		0	0	0.251036	1	0.000672561	0.0720952	6.99683	0.98	0	0	2.19805	1	1		0.0874163		0.743717	0.231373	0.00988094	6.90285	FALSE
RPL10	63		0	0	0.772858	1	0.0522939	0	2.436	1	1		0.381837		3.19573e-08	0	0.519375	1	0.826722	0.0990032	0.0318024	1.5466	FALSE
RPL24	61		0.203856	0	0.827069	1	1		2.95045		0.0234123	0	0.785323	1	1		0.170182		0.925095	0.0286781	0.0176969	2.51861	FALSE
RPL5	61		0	0	0.718009	1	0	0	2.87378	1	0	0	0.735921	1	1		0.310326		0.88587	0.0680555	0.0104652	2.94755	FALSE
RPL7A	56		5.15482e-13	0	0.239899	1	0	0	3.45893	1	1		0.201535		1		0.0129278		0.595247	0.198079	0.0940445	4.5873	FALSE
RPL8	59		5.37099e-13	0	0.264763	1	0	0	2.56728	1	1		0.0055499		0.00147112	0	0.224388	1	0.226404	0.081543	0.0609111	4.02557	FALSE
RSRP1	38		0	0	0.931096	1	0	0	2.52487	1	0	0	2.0002	1	1		0.311926		0.501639	0.197353	0.0533611	4.53265	FALSE
RSRC2	35		3.05625e-07	0	0.524929	1	0	0	2.04152	1	0.0031316	0.071989	1.74951	0.98	1		0.210162		0.346758	0.189956	0.123807	2.67359	FALSE
RRP9	4		0.196067	0	0.26432	1	0	0	3.97765	1	1		0.0325746		1		0.0418674		0.802181	0.068117	0.0403479	3.93126	TRUE
RRBP1	32		6.38806e-07	0	2.70211	1	0	0	2.64099	1	0	0	2.88704	1	1		0.733233		0.474949	0.349268	0.0426612	5.12235	FALSE
RPSA	55		0	0	0.880722	1	0	0	2.4709	1	0	0	0.552661	1	0	0	0.330512	1	0.748508	0.0628407	0.0539592	2.15671	FALSE
RPS4X	61		0.199229	0	0.179605	1	0	0	3.22528	1	0.927648		0.206365		1		0.0376545		0.907626	0.0391401	0.0126051	3.21405	FALSE
RPS3	61		0	0	1.60148	1	0	0	2.86921	1	1		0.356949		1		0.307416		0.301205	0.131256	0.0834229	6.90629	FALSE
RPS28	62		0.000585167	0	0.210648	1	1		0.0598869		1		0.159533		1		0.88		0.525176	0.242617	0.120177	78.7517	FALSE
RPS27	65		2.74888e-10	0	0.372344	1	0.03952	0	2.54702	1	1		0.292004		1		0.000732266		0.973555	0.015118	0.00477207	2.94118	FALSE
RPS27A	60		4.23783e-11	0	0.509559	1	0	0	3.33744	1	0.0425304	0	0.367837	1	0	0	0.556559	1	0.926734	0.0325301	0.0163165	2.64401	FALSE
RPS25	63		0	0	0.219332	1	0	0	2.01261	1	0	0	0.495342	1	0	0	0.173039	1	0.447224	0.190891	0.147311	1.31752	FALSE
RPS24	61		0	0	1.32188	1	0	0	2.04903	1	0	0	1.50951	1	0	0	1.27033	1	0.531113	0.27069	0.100352	4.31076	FALSE
RPS23	62		0	0	0.524307	1	0	0	1.45616	1	1		0.188951		1		0.0311174		0.369582	0.193306	0.156466	1.2656	FALSE
RPS16	62		0.0797289	0	0.22389	1	4.4223e-05	0	2.36633	1	1		0.0147222		0.00853415	0	0.349211	1	0.864083	0.083368	0.0222201	0.78106	FALSE
RPS14	66		0.00197511	0	0.526005	1	1		2.40328		1		0.451196		1		0.0382125		0.323361	0.207833	0.128733	1.81662	FALSE
RPS10	60		1.67061e-07	0	0.16089	1	0	0	14.3647	1	0.000100487	0	1.94728	1	0.54042		0.74115		0.687157	0.0797033	0.0678461	15.0299	TRUE
RPN2	43		7.52459e-05	0	1.36303	1	0	0	5.19121	1	1		0.347925		0	0	1.38718	1	0.842317	0.0725975	0.0300565	4.75833	TRUE
RPLP2	65		0.0315352	0	0.128269	1	0	0	2.40823	1	0	0	0.294592	1	0	0	0.621269	1	0.770149	0.0959142	0.0615496	0.998968	FALSE
RPLP1	66		0	0	0.448062	1	1		0.292321		0	0	1.28539	1	1		0.074177		0.602966	0.103253	0.0464426	12.3291	FALSE
RPAIN	26		0	0	1.11087	1	0	0	2.26242	1	1		1.0993		1		0.98364		0.465726	0.165158	0.159247	3.25369	FALSE
RORA	9		1.87337e-09	0	1.32975	1	4.17072e-07	0	0.993072	1	0	0	1.59997	1	1		0.398181		0.386293	0.315425	0.115455	4.66466	FALSE
RNF213	33		0.105812	0	0.713945	1	0	0	1.58015	1	0.0146843	0	0.3276	1	1		0.117266		0.470855	0.148461	0.0698912	1.99603	FALSE
RNF10	23		1.25519e-05	0	0.499328	1	0	0	4.38602	1	0	0	1.70179	1	1		0.439524		0.575964	0.183738	0.073877	6.23484	TRUE
RAB6A	20		0.00443984	0	0.788689	1	0	0	3.21575	1	0	0	2.58838	1	3.32006e-13	0	1.00725	1	0.509099	0.309647	0.0574441	3.31024	FALSE
RAB38	5		5.28619e-08	0	0.74846	1	0	0	1.36945	1	0.191613		1.34731		0.000372319	0	0.580124	1	0.464818	0.18609	0.126448	1.4948	FALSE
RAB33A	10		0	0	1.69371	1	4.78539e-09	0.129398	1.21057	0.96	1.66371e-05	0	1.75355	1	0.140484	0.170043	0.367672	0.94	0.382698	0.279421	0.0994732	1.74	FALSE
RAB2A	31		0.0269591	0	0.373041	1	0	0	3.43493	1	1		0.423805		1		0.217199		0.808842	0.0797543	0.0570089	3.90447	FALSE
RAB24	17		4.10657e-15	0	1.09415	1	0	0	2.34875	1	1		0.709421		1.37345e-07	0.036918	0.489378	0.99	0.558176	0.219915	0.0497923	3.04627	FALSE
RAB14	8		0.0314441	0	0.268171	1	0.0477826	0.180814	3.22543	0.94	0	0	0.883548	1	1.56645e-09	0	0.743801	1	0.743023	0.128146	0.0652593	2.96326	FALSE
QTRT1	15		0.0666475	0	0.612204	1	9.71091e-06	0	3.07102	1	1		0.253025		0.125824	0.85489	0.298993	0.42	0.834954	0.0563362	0.0312833	5.30109	FALSE
QDPR	10		0.148313	0	0.737574	1	1.47016e-07	0	2.6031	1	1		0.00697832		7.88887e-05	0.036918	1.92476	0.99	0.580725	0.249825	0.124811	3.96234	FALSE
QARS1	28		4.41834e-09	0	0.390404	1	0	0	3.90274	1	0	0	1.2749	1	1		0.506449		0.705317	0.115062	0.0514586	4.5372	TRUE
PYGL	6		4.38291e-05	0	0.394429	1	0	0	2.75615	1	1		0.142275		1		0.0853118		0.751625	0.106007	0.0358808	3.11336	FALSE
PYGB	3		1.76498e-08	0	0.99988	1	0.0100478	0.101965	1.57867	0.97	0.00232519	0.203749	0.564003	0.93	1		0.0315243		0.693059	0.17545	0.0341605	2.19998	FALSE
PWWP2A	10		1.54084e-12	0	1.31669	1	4.06954e-05	0.180814	1.3132	0.94	1		0.0394878		0.372684		0.62236		0.492261	0.11869	0.0923074	2.46478	FALSE
PVT1	7		0.0321327	0	0.461005	1	2.0851e-13	0	1.64373	1	0.0956582	0.356142	0.710038	0.86	2.45541e-10	0	0.876595	1	0.167069	0.142079	0.108202	2.21741	FALSE
PUF60	31		1.45347e-13	0	0.661887	1	0	0.0390774	2.46115	0.99	1		2.80904		1		0.621124		0.489331	0.386923	0.0840184	5.43444	FALSE
PTPRE	14		1.24996e-12	0	0.91478	1	7.42688e-13	0	1.5013	1	0	0	1.25332	1	1.9028e-07	0	0.590592	1	0.402456	0.199361	0.112498	3.74887	FALSE
PTPRC	26		0	0	0.681043	1	0	0	3.02198	1	0	0	1.40919	1	0.190319	0.493666	0.459377	0.78	0.62126	0.16593	0.0877698	2.74688	FALSE
PTPRA	22		8.4437e-08	0	0.592483	1	6.13374e-10	0.0720952	2.16507	0.98	1		0.464489		1		0.542773		0.393859	0.179097	0.110242	2.66952	FALSE
PTPN2	25		0.00893507	0	0.813291	1	0	0	3.82079	1	0	0	1.37367	1	0	0	1.60168	1	0.574533	0.148323	0.099056	5.06295	TRUE
PTPN13	8		0.0970371	0	0.822957	1	4.39715e-05	0.0390774	1.4814	0.99	1		0.448		0.063178	0	1.06484	1	0.321435	0.148725	0.0841604	2.61613	FALSE
RABGAP1L	17		1.55463e-12	0	0.806588	1	0.16469		1.38444		0.00323183	0.226085	1.10813	0.92	3.90486e-12	0	0.855815	1	0.347866	0.142567	0.103143	5.41383	FALSE
RTCB	21		0.00635509	0	1.30199	1	0	0	4.42953	1	1		1.20862		1		0.333946		0.892074	0.0465883	0.0289903	3.99584	TRUE
RABGGTB	14		0.155026	0	0.867647	1	9.2919e-08	0.204298	3.11669	0.93	1		0.916318		1		0.355177		0.539497	0.173933	0.0933949	4.51452	FALSE
RALGPS1	2		2.41749e-07	0	1.0676	1	0.149239		0.583177		1		0.0648304		1		0.130581		0.389894	0.137879	0.0959114	2.97867	FALSE
RNASEH2C	22		0.00443572	0	1.18925	1	1.42474e-10	0	1.57714	1	0.541364		0.482982		1		0.0156801		0.530599	0.196008	0.0965797	2.57888	FALSE
RNASE4	13		0	0	1.71755	1	0	0	1.54585	1	0.0027361	0.880812	1.01512	0.43	1		0.208807		0.540665	0.34204	0.0644092	2.40433	FALSE
RNASE1	12		5.76808e-07	0	0.379097	1	0	0	1.22641	1	3.01563e-07	0	0.610024	1	1		0.0888651		0.498276	0.294149	0.0692951	1.48575	FALSE
RMDN2	6		2.34872e-14	0	1.5546	1	1		1.359		1.38119e-10	0	0.950504	1	1.37812e-13	0	0.505949	1	0.537623	0.188779	0.0642406	1.14956	FALSE
RHOC	27		0.150877	0	0.322753	1	7.2792e-16	0	4.18287	1	0	0.412655	1.33396	0.83	1		0.227821		0.81625	0.106857	0.0356786	7.80931	TRUE
RHOBTB2	2		0.00676222	0	1.02162	1	0.00462756	0.252424	1.30491	0.91	1		0.307085		0.96599		0.349176		0.404955	0.167553	0.145841	1.97409	FALSE
RFC4	4		0.0661924	0	0.272436	1	8.05653e-07	0.228154	2.74247	0.92	4.01375e-05	0.0395479	1.1665	0.99	1		0.361909		0.514112	0.249741	0.165452	3.83474	FALSE
RBPJ	23		0.17971	0	0.596312	1	0	0	3.9474	1	0.377522		2.01707		0	0	1.31087	1	0.43392	0.304019	0.0842257	6.17799	TRUE
RBM5	28		4.78196e-05	0	0.379507	1	1.77065e-13	0	3.76077	1	1		0.373155		1		1.01931		0.415403	0.17137	0.149239	4.54768	TRUE
RBM4	32		0	0	1.36045	1	0	0	2.16041	1	0	0	1.4948	1	0	0	0.809945	1	0.607863	0.231749	0.0423291	3.67935	FALSE
RBM39	55		6.04578e-13	0	0.880969	1	0	0	2.68104	1	0	0	1.87867	1	1		1.4975		0.337471	0.281802	0.0926527	5.96309	FALSE
RBM34	29		5.96106e-13	0	0.791511	1	0	0	3.30798	1	2.24843e-15	0	1.04442	1	1		0.242217		0.659615	0.146818	0.0416793	3.3025	FALSE
RBM33	6		0.0107815	0	0.931129	1	5.00259e-09	0.155459	2.13665	0.95	0.104386	0	0.353069	1	0.000638295	0	0.497982	1	0.513709	0.0910512	0.0856133	2.42249	FALSE
RBIS	38		0	0	0.758262	1	0	0	2.14443	1	1.03084e-05	0	1.04134	1	1		0.140713		0.728966	0.243736	0.0117338	2.6126	FALSE
RB1CC1	14		0.000411069	0	0.383075	1	4.14325e-05	0.402659	1.18011	0.84	1		0.630252		1		0.212681		0.375371	0.164699	0.0904599	3.72579	FALSE
RASGRP2	12		3.49056e-05	0	0.793497	1	0	0	2.67282	1	1.70227e-06	0	1.38921	1	0.000834481	0.3803	0.763614	0.84	0.514076	0.168272	0.119217	3.3654	FALSE
RAPGEF5	4		0.000148832	0	0.732824	1	2.78082e-05	0.155459	1.619	0.95	0.58704		0.33022		0.106346	0.323543	0.532494	0.87	0.510095	0.0918654	0.08379	3.0276	FALSE
RAP2C-AS1	4		2.11566e-07	0	1.01856	1	0.928577		0.545386		0.561113		0.705961		1		0.0568345		0.432405	0.205805	0.110897	2.70182	FALSE
RAN	44		2.03553e-12	0	0.833247	1	0	0	3.545	1	7.28133e-06	0	1.50989	1	1		0.404194		0.933323	0.0406966	0.0143741	7.26132	TRUE
RAC1	41		0	0	0.759569	1	0	0	4.70303	1	0	0	1.10944	1	1		0.137985		0.528726	0.21287	0.0824232	4.49013	TRUE
GMDS	11		0.00360848	0	0.714237	1	0	0	3.1731	1	2.75243e-10	0	1.39992	1	1		0.105039		0.711325	0.0948499	0.0478346	3.85466	FALSE
RTN4	20		7.52444e-08	0	0.553036	1	0	0	4.05006	1	0	0	3.04213	1	0	0	1.60017	1	0.499293	0.259935	0.0637485	5.36667	TRUE
RUVBL1	22		0	0	1.21446	1	0	0	3.45853	1	1		0.925974		0	0	1.21607	1	0.65747	0.108397	0.0969391	3.39593	FALSE
SNU13	40		0	0	0.50736	1	0	0	2.09533	1	0	0	1.67301	1	1		0.088283		0.762854	0.193509	0.0275389	3.27859	FALSE
SNRPA1	30		1.63414e-08	0	0.486004	1	0	0	2.90284	1	0	0	1.58586	1	1		0.363202		0.517213	0.306557	0.0846836	4.80334	FALSE
SNRNP200	28		8.7282e-08	0	0.612306	1	0	0	2.77703	1	1		0.550443		1		0.325628		0.455458	0.189622	0.0657021	2.90857	FALSE
SNHG8	36		0.000315493	0	2.84786	1	7.2792e-16	0.0720952	3.94509	0.98	2.24843e-15	0	0.850461	1	1		0.360586		0.752675	0.149847	0.0500888	6.08887	FALSE
SNHG12	12		0.0879032	0	0.553812	1	9.41129e-05	0.0390774	1.32243	0.99	0.0431501	0.071989	1.01096	0.98	0.206229	0.47378	0.547341	0.79	0.399233	0.271279	0.144936	4.37921	FALSE
SND1	21		0.00222964	0	0.443535	1	0	0	5.2049	1	0	0	1.11117	1	1		0.820483		0.684524	0.0936028	0.0464673	5.90014	TRUE
SMU1	13		0.121685	0	0.453802	1	0.0853557	0.700245	1.96376	0.68	0.017371	0.226085	0.520751	0.92	0.0113175	0.962892	0.694917	0.52	0.481013	0.217049	0.0873083	2.07875	FALSE
SMNDC1	5		0.186168	0	0.827129	1	0.0771807	0	1.15445	1	1		0.537298		1		0.155186		0.702073	0.192169	0.0748941	2.95205	FALSE
SNX10	6		7.1009e-06	0	0.635068	1	7.74301e-13	0	1.66837	1	1		0.229341		1		0.34819		0.657077	0.155599	0.13292	3.69181	FALSE
SMIM27	33		0.00567952	0	0.783071	1	0	0	1.93575	1	1		0.211245		1		0.314136		0.644981	0.129706	0.119771	1.93575	FALSE
SMG8	2		2.03313e-07	0	0.887746	1	1.55345e-05	0.129398	1.40555	0.96	0.000582068	0	0.519803	1	1		2.06579e-16		0.839531	0.160469	7.47815e-33	1.81372	FALSE
SMARCE1	33		0.000131699	0	0.937789	1	0	0.339201	3.0677	0.87	0.00135608	0.0395479	1.4829	0.99	1		0.0359181		0.786788	0.164078	0.0141301	2.10743	FALSE
SMARCAL1	3		0.00020145	0	0.794851	1	3.94088e-12	0.0390774	3.5473	0.99	0.227512		0.588054		0.515917		0.313336		0.680002	0.0845687	0.0589047	3.90951	TRUE
SMARCA5	23		2.78867e-05	0	0.638624	1	0	0	2.40692	1	1		0.377593		0.0226378	0.549868	0.323574	0.75	0.584573	0.180277	0.0643248	2.9099	FALSE
SMAP2	26		0.0103485	0	0.422526	1	0	0	3.04785	1	1		0.923096		1		0.0575346		0.472677	0.144149	0.0624838	5.83393	FALSE
SMAGP	5		3.05616e-06	0	0.415616	1	0	0	1.57576	1	1		0.519756		1		0.183217		0.666801	0.207625	0.120022	3.66665	FALSE
SLTM	38		3.7494e-08	0	0.543905	1	0	0	2.65442	1	0.454483		0.751359		0.0271184	0.323543	0.721093	0.87	0.529376	0.100303	0.0698134	3.31357	FALSE
SLCO4A1	9		3.76369e-06	0	1.1529	1	0.000123728	0.180814	2.68247	0.94	7.93926e-09	0	1.06986	1	1.29095e-05	0	0.905764	1	0.534592	0.11229	0.109342	2.43839	FALSE
SMIM14	15		3.94559e-10	0	0.53319	1	0	0	2.76088	1	0	0	1.67626	1	0	0	0.915072	1	0.81614	0.0797394	0.0221636	3.10562	FALSE
SNX14	14		0.0326771	0	0.437968	1	0.000197752	0	2.45883	1	1		0.310216		1		0.198891		0.394129	0.179347	0.0933222	4.61296	FALSE
SNX2	29		0.0147406	0	0.41177	1	0	0	1.82909	1	4.74489e-10	0	0.967323	1	1		0.382861		0.497598	0.198627	0.0981189	2.90183	FALSE
SNX6	33		0.0315369	0	0.895136	1	0	0	3.80237	1	0	0	1.30269	1	0.027007	0	0.841874	1	0.722444	0.110874	0.0679392	2.7182	TRUE
SRRM2	34		0	0	1.21249	1	6.27644e-09	0	1.81636	1	5.05373e-08	0	1.06667	1	1		0.201196		0.318193	0.232224	0.100945	2.39373	FALSE
SRPX2	6		5.04752e-10	0	0.633687	1	0	0.0390774	3.31389	0.99	4.28624e-05	0.375036	0.372547	0.85	1		0.0967927		0.750236	0.0864083	0.0391643	1.93123	FALSE
SRP19	39		0	0	0.573341	1	0	0	2.0481	1	1		0.224975		1		0.0554429		0.422538	0.288139	0.145625	2.37465	FALSE
SRM	21		0.0138291	0	0.589638	1	4.03271e-10	0	3.14792	1	1		0.372937		1		0.163499		0.877584	0.0520499	0.0252473	3.16815	FALSE
SREK1	30		4.50397e-06	0	0.855716	1	0	0	2.94414	1	0.555116		0.912998		0.0317753	0.455852	0.478581	0.8	0.471607	0.179062	0.103327	3.8695	FALSE
SQOR	21		6.41872e-12	0	0.896849	1	0	0	3.7041	1	1		0.265447		0.583372		0.412994		0.801887	0.0907283	0.0441071	4.25176	TRUE
SPTBN1	20		0.051989	0	0.691216	1	0	0	2.89976	1	0	0	3.04642	1	1		0.395858		0.383713	0.217948	0.107077	2.76586	FALSE
SPTAN1	23		1.06772e-06	0	0.557669	1	0	0	2.02716	1	1		0.385393		1		0.479364		0.320869	0.209065	0.0939196	3.96507	FALSE
SPRYD3	7		5.66328e-07	0	0.392495	1	0	0	3.34569	1	1		0.12404		2.02633e-08	0	0.624684	1	0.596518	0.0805377	0.0562648	3.37568	FALSE
SPOUT1	2		0.153764	0	0.475874	1	0.0131408	0.483249	1.70478	0.8	0.000160676	0	0.888908	1	1		0.082994		0.49611	0.301081	0.0684584	1.7591	FALSE
SPOCK2	4		4.66902e-13	0	1.25262	1	0	0	1.77628	1	0.000188023	0	0.799539	1	0.0367053	0	0.311415	1	0.773636	0.149	0.064789	3.35474	FALSE
SPNS1	8		0.000117124	0	0.998082	1	1		1.17136		2.81806e-07	0	0.953424	1	1		0.176997		0.422353	0.275223	0.196671	3.65306	FALSE
SPATS2L	18		0.014658	0	0.700003	1	0.0495593	0	1.76093	1	0	0	1.50664	1	0.039107	0	0.624534	1	0.432288	0.216326	0.0689552	4.2352	FALSE
SPARCL1	19		0.000322371	0	0.356099	1	0.00748659	0	3.74656	1	0	0	1.33599	1	3.34258e-06	0	0.322801	1	0.801688	0.0981362	0.0349631	2.59644	TRUE
SPAG4	5		0.071232	0	0.69634	1	0.554915		3.15627		1		0.239854		1		0.15967		0.555943	0.124064	0.110732	3.18871	FALSE
SORBS2	8		1.39409e-05	0	0.657463	1	5.57863e-06	0.0390774	2.84312	0.99	0.00287258	0.071989	1.00439	0.98	1.83258e-08	0	1.59514	1	0.390731	0.112882	0.0978392	2.82463	FALSE
SOD2	25		2.73485e-10	0	0.856325	1	0	0	2.64451	1	1		0.300741		1		0.1188		0.532152	0.0690769	0.0500222	2.69729	FALSE
SOCS2	8		0.039853	0	0.578849	1	0	0	1.8273	1	0.00329358	0	0.593748	1	0.168396	0.036918	0.279318	0.99	0.517099	0.194497	0.16314	1.7862	FALSE
SNX8	6		0.0285109	0	0.595002	1	1.39148e-12	0.0390774	3.97159	0.99	9.2832e-13	0	1.4815	1	1		0.195556		0.729096	0.101917	0.051069	3.98368	TRUE
SLC7A8	11		0.0828129	0	0.19182	1	1		3.25301		0	0	2.5479	1	1		0.15862		0.487783	0.347036	0.0395858	2.90511	FALSE
SLC3A2	36		5.37099e-13	0	0.632055	1	0	0	3.42756	1	1		0.189575		5.23193e-15	0	0.825552	1	0.656783	0.0757378	0.0596914	3.31857	FALSE
SLC35B1	20		7.02941e-05	0	0.615914	1	0	0	3.28703	1	0	0.0395479	2.50058	0.99	0.242705	0.036918	0.509489	0.99	0.624346	0.202975	0.0620083	3.58847	FALSE
SLC2A3	37		0.000435725	0	0.299827	1	0	0	4.64235	1	9.01693e-05	0	0.504519	1	0	0	1.05247	1	0.549822	0.139253	0.107399	4.18355	TRUE
SEC61G	41		0.134656	0	0.538678	1	0.280727		2.16407		1		0.185243		1		0.141436		0.735548	0.190795	0.035231	2.52641	FALSE
SEC31A	33		3.23938e-09	0	0.573342	1	0	0	2.33851	1	6.82794e-09	0	1.44784	1	0.000229658	0	1.10514	1	0.331935	0.13702	0.126875	3.58489	FALSE
SEC14L1	20		9.55751e-06	0	1.33365	1	0	0	3.91481	1	0.000252083	0.071989	1.23893	0.98	0.00691662	0	0.953839	1	0.505988	0.128001	0.0768021	4.84445	TRUE
SDR39U1	15		3.76294e-07	0	0.604645	1	1		1.58105		1		0.524857		0.243772	0.036918	0.358646	0.99	0.468697	0.161849	0.112221	3.05093	FALSE
SDHAP1	13		1.25509e-09	0	1.32269	1	1		0.833104		9.7646e-06	0.831366	1.06893	0.6	2.85251e-08	0.0947818	0.637724	0.97	0.345013	0.247171	0.147556	2.61034	FALSE
SDCCAG8	6		0	0	1.74426	1	0	0	1.74432	1	1		0.0684837		1		3.04002e-16		0.994721	0.00527853	1.12791e-31	3.18355	FALSE
SCYL1	9		5.21833e-08	0	0.943882	1	0.179557		2.41199		2.74742e-06	0	0.640602	1	8.06947e-06	0.036918	0.820852	0.99	0.475493	0.167028	0.144871	3.00362	FALSE
SCFD2	4		0.131018	0	0.783792	1	0.661024		2.8824		0.00130144	0	0.662884	1	1		0.0380361		0.799259	0.0667753	0.0523167	3.69662	FALSE
SC5D	11		0	0	1.67362	1	0.000314687	0	1.98117	1	1.76775e-09	0	0.670544	1	1		0.269205		0.828935	0.116616	0.0302854	1.48935	FALSE
SAT2	19		1.24594e-05	0	0.931521	1	0	0	1.66882	1	1		1.14344		1		0.39315		0.348715	0.281976	0.233554	2.79368	FALSE
SAT1	52		0	0	0.74295	1	0	0	2.37667	1	0	0	0.862169	1	1		0.335666		0.770757	0.174709	0.0181985	2.99606	FALSE
SASH1	12		0.0470982	0	0.709928	1	7.61999e-11	0	2.95721	1	1		0.17308		0.0762148	0	0.710929	1	0.37527	0.241591	0.118906	1.9126	FALSE
SAMM50	18		6.1662e-08	0	0.930738	1	0	0	4.24341	1	4.99324e-06	0	0.739041	1	1		0.274212		0.832045	0.0488992	0.0207943	3.88254	TRUE
SAMHD1	14		1.10902e-05	0	0.955088	1	0	0	4.03099	1	2.2921e-07	0	1.54787	1	1		0.280499		0.636067	0.121767	0.0532834	4.41224	TRUE
S100A4	36		0	0	0.392589	1	0	0	1.25949	1	1		0.357862		1		0.261549		0.556283	0.190135	0.15496	3.56708	FALSE
S100A16	19		0	0	0.969854	1	0	0	0.329321	1	0	0	1.0373	1	0	0	0.692506	1	0.352605	0.249278	0.234935	0.24306	FALSE
S100A13	16		7.91281e-10	0	0.389063	1	0	0	1.55549	1	0	0	1.96036	1	1		0.132394		0.415708	0.19987	0.122259	1.89806	FALSE
S100A10	41		0.0990983	0	0.248703	1	1		1.92522		1		0.0402672		1		0.00253211		0.887848	0.0525295	0.0417592	1.15876	FALSE
RWDD2B	11		0.00022433	0	0.498845	1	1.40702e-12	0.0720952	2.19696	0.98	0.00102583	0.101705	0.815628	0.97	1		0.465916		0.467006	0.360018	0.0914046	2.94406	FALSE
SECISBP2	26		0.000448209	0	0.461303	1	0	0	2.78387	1	0.000670636	0	0.849608	1	0.7108		0.263864		0.463854	0.106403	0.086666	3.04816	FALSE
RUSC1-AS1	28		2.90238e-11	0	0.325918	1	0	0	2.23582	1	1		0.417893		1		0.734153		0.424891	0.143581	0.116111	2.4566	FALSE
SELENOP	18		4.32998e-06	0	0.441994	1	5.36048e-05	0	2.93915	1	1		0.0481699		1.87212e-05	0	0.930633	1	0.720245	0.0949184	0.0558631	3.02883	FALSE
SERGEF	6		0.068284	0	0.279106	1	2.97516e-08	0.252424	3.70177	0.91	0.318364		0.634663		0.00120234	0.0947818	1.46507	0.97	0.484153	0.203159	0.107567	4.17523	FALSE
SLC26A5	24		0.00891527	0	0.417166	1	1		0.00883157		1		0.173917		1.02182e-14	0.036918	1.23033	0.99	0.497854	0.217942	0.139816	0.557299	FALSE
SLC25A5	45		0.0412074	0	0.333753	1	1.05849e-06	0	0.904304	1	2.05703e-05	0	1.03916	1	1		0.0904401		0.317328	0.249701	0.14559	0.730766	FALSE
SLC25A3	45		0.000732212	0	0.284235	1	0	0	3.35879	1	1		0.542465		0.952463		0.359682		0.823312	0.0780919	0.0527002	5.05083	FALSE
SLC25A37	18		0.000251269	0	2.23993	1	0	0	2.56002	1	0.00152478	0	0.695869	1	1		0.562601		0.70573	0.166288	0.0678354	2.53544	FALSE
SLC25A36	12		0.000999427	0	0.4672	1	0	0	3.04914	1	0	0	1.02061	1	0.197184	0.036918	0.430326	0.99	0.622143	0.204726	0.0485133	3.86444	FALSE
SKP1	52		0	0	0.402375	1	0	0	3.33019	1	0.00234041	0	0.272397	1	0	0	1.14439	1	0.709134	0.130782	0.0854266	5.78385	FALSE
SHKBP1	14		2.44926e-09	0	0.68217	1	0	0	3.54639	1	0.000250281	0.294982	0.713951	0.89	4.43273e-05	0.0678899	0.73163	0.98	0.74092	0.104693	0.0660539	3.2073	TRUE
SHISA5	23		0	0	0.584426	1	0	0	3.15118	1	0	0	1.80937	1	1		0.167439		0.492412	0.288502	0.0787138	4.23694	FALSE
SH3KBP1	30		1.45458e-09	0	0.62136	1	0	0	2.91748	1	0	0	1.92934	1	0	0	1.1826	1	0.488908	0.178866	0.135312	4.66132	FALSE
SH3GLB1	27		0	0	1.16889	1	0	0	3.3851	1	0	0	1.19831	1	0.0460496	0.341039	0.709886	0.86	0.751431	0.127051	0.0376269	3.99601	FALSE
SH2D3C	9		0.0381189	0	0.608166	1	0.217185		1.91065		2.12963e-14	0	1.75706	1	1		0.241572		0.460408	0.19014	0.0976625	4.62357	FALSE
SGMS1	5		0.142061	0	0.638902	1	0.245845		0.998108		0.000114609	0.0395479	0.560364	0.99	0.0561105	0.85489	1.2436	0.58	0.456674	0.176413	0.124612	3.82803	FALSE
SF3B1	45		0.013216	0	0.46923	1	0	0	2.79904	1	2.80957e-12	0	1.23252	1	1		1.0823		0.584232	0.272714	0.0653579	3.21277	FALSE
SF1	32		5.48504e-06	0	0.458714	1	0	0	2.06554	1	1		1.16641		1		0.41074		0.422842	0.184311	0.125461	3.80951	FALSE
SERTAD3	10		0.0232998	0	0.646659	1	0.0166211	0.0390774	0.646544	0.99	1		0.00711461		1		0.0259126		0.775125	0.124549	0.0454251	3.76069	FALSE
SERPINH1	11		0.196067	0	0.333654	1	0	0	3.31964	1	4.4418e-15	0	0.870332	1	1		0.169874		0.740995	0.124172	0.0394427	2.92413	FALSE
SERPINF1	11		0.0297558	0	0.563967	1	0	0	3.34424	1	1		0.0394999		1		0.299774		0.604147	0.0639496	0.05883	3.14353	FALSE
SERPINB6	23		0.0252637	0	0.23221	1	0	0	3.63372	1	1		1.50686		0.0330879	0	0.479484	1	0.582229	0.172514	0.0591619	5.95917	TRUE
SERPINB1	29		1.5829e-14	0	0.522604	1	0	0	3.56823	1	1		0.335567		1		0.632811		0.777449	0.0752914	0.0522504	4.88321	TRUE
SEPTIN6	23		0.0147416	0	0.453008	1	9.02287e-11	0.180814	2.81849	0.94	0	0	2.54194	1	0.000414356	0.0947818	0.961429	0.97	0.545484	0.153706	0.100781	3.23633	FALSE
GLA	11		0.00299891	0	0.410681	1	0.00698564	0	0.702593	1	5.56616e-11	0	1.25901	1	0.000229658	0	0.483127	1	0.530059	0.287338	0.0767837	7.57519	FALSE
MLLT3	7		3.67127e-07	0	1.28658	1	7.2792e-16	0	1.58137	1	1		0.513565		4.25134e-12	0	1.36957	1	0.373884	0.267843	0.177164	1.55736	FALSE
ARL4A	21		0	0	0.860686	1	0	0	1.01331	1	0	0	0.772221	1	1		0.532229		0.527628	0.293411	0.164534	2.91229	FALSE
CKAP2	8		0.00742442	0	0.538372	1	0.0111651	0.252424	1.77923	0.91	0.0653735	0.226085	0.634869	0.92	1		0.362004		0.636842	0.207166	0.061252	2.46537	FALSE
CILP	4		6.79503e-09	0	1.14106	1	0	0	3.16382	1	0.876941		0.464545		0.00211836	0.036918	0.540275	0.99	0.583313	0.0871275	0.0751311	1.90029	FALSE
ENDOV	3		0.0918462	0	0.604271	1	0.0820193	0.981965	1.13656	0.51	1		0.284487		0.600442		0.523744		0.306432	0.163484	0.115941	4.00488	FALSE
BDKRB1	2		3.49588e-06	0	1.342	1	4.14464e-06	0	1.20183	1	1		0.0628834		1		0.0849327		0.920676	0.0528054	0.0265183	1.6222	FALSE
ARL6IP4	40		3.63309e-05	0	0.395087	1	0	0.0720952	2.99497	0.98	6.18077e-11	0.203749	1.89403	0.93	1		0.737606		0.45569	0.221502	0.0870687	4.833	FALSE
C20orf27	11		0.00160943	0	0.734159	1	9.76794e-14	0	2.7848	1	1		0.31538		1		0.126693		0.8038	0.104079	0.0391613	2.58696	FALSE
ALDOA	54		0.0304736	0	0.206906	1	0	0	3.87648	1	0	0	1.73687	1	1		0.610448		0.342236	0.130434	0.115612	5.82884	TRUE
DHDH	2		1.07242e-09	0	1.2894	1	1.23738e-06	0	1.73308	1	0.134728	0.15545	1.03817	0.95	1		0.187917		0.435761	0.253182	0.0859633	3.70102	FALSE
BCL6	21		0	0	1.5099	1	0	0	2.02961	1	0	0	0.945905	1	1		1.09919		0.506599	0.196487	0.116081	2.09978	FALSE
ENO1	47		5.29162e-05	0	0.31335	1	0	0	4.72641	1	0.0317654	0	0.525859	1	1		0.0877088		0.544695	0.0806558	0.0645326	5.7166	TRUE
ALDH2	16		0.00686164	0	0.291625	1	0	0	5.43035	1	8.10636e-06	0	0.628454	1	0	0	0.753341	1	0.811091	0.050281	0.0239309	5.25552	TRUE
ENOSF1	14		0.000383295	0	0.548176	1	9.44672e-05	0	2.82848	1	1.39483e-10	0	1.35923	1	1		0.547231		0.448877	0.119847	0.0936878	5.32404	FALSE
BCAT1	5		4.51701e-08	0	1.0296	1	5.44452e-14	0	2.46503	1	2.85217e-08	0	0.973899	1	1		0.169496		0.549426	0.165125	0.0966802	2.9951	FALSE
ALDH1A1	14		0.199597	0	0.214387	1	0.296441		0.275349		1		0.734333		9.38882e-08	0	0.862621	1	0.393916	0.323384	0.15538	0.25238	FALSE
CIB1	42		0.122557	0	0.285688	1	0	0	3.76852	1	1		0.0258709		0.000113711	0	0.736454	1	0.871901	0.0600771	0.0210302	3.7654	TRUE
AKAP9	43		0.0860818	0	0.864911	1	0	0	3.31537	1	2.28785e-09	0	1.95507	1	1		1.33161		0.499768	0.0707514	0.0588266	3.75633	FALSE
BBS1	4		0.00878748	0	0.499946	1	1		1.11187		0.00919146	0.203749	1.18183	0.93	1		0.177723		0.455764	0.328963	0.0511862	2.29438	FALSE
CHURC1-FNTB	37		0	0	1.74541	1	1.01745e-08	0	1.5898	1	0	0	1.76737	1	1		0.0467103		0.844737	0.0856532	0.0322655	4.58846	FALSE
ENSA	24		0.123874	0	0.486722	1	1		1.63585		1		0.0144338		1		0.069391		0.57079	0.204884	0.0685026	2.73208	FALSE
ARL16	16		0	0	1.16797	1	0	0	2.95049	1	3.47618e-10	0	1.47024	1	1.76367e-08	0	0.579979	1	0.620291	0.216573	0.0660279	3.75954	FALSE
AKAP8L	4		0.000211976	0	0.746289	1	1		1.06507		0.0132157	0.619494	0.760836	0.72	0.0140629	0.341039	0.775853	0.86	0.455546	0.162231	0.0987562	3.43376	FALSE
ENAH	2		8.35467e-05	0	1.08738	1	6.02738e-14	0	1.64806	1	1		0.0716871		1		0.613962		0.401217	0.258403	0.136825	3.76763	FALSE
DHX32	7		7.40181e-11	0	0.967803	1	0.00621831	0.0720952	2.04418	0.98	1		0.326785		1		0.146924		0.35346	0.231909	0.0988608	2.76867	FALSE
CLEC4A	6		0.0303769	0	0.386893	1	0	0.0390774	3.01839	0.99	0	0	1.11243	1	0.043797	0.036918	0.389447	0.99	0.617557	0.176783	0.0913066	2.57802	FALSE
EIF5	49		0	0	0.784934	1	0	0	2.31715	1	0	0	2.33102	1	1		0.731698		0.617638	0.202257	0.0559339	5.18229	FALSE
CXCL2	12		0.00112388	0	0.507937	1	1		2.42991		1		0.362134		1		0.30933		0.436541	0.205151	0.15547	2.02524	FALSE
ELF1	40		0	0	0.678487	1	0	0	1.8104	1	0	0	2.5943	1	4.17917e-05	0.192327	1.36807	0.93	0.372894	0.269248	0.157543	3.33409	FALSE
ANGEL2	4		7.02572e-05	0	1.03441	1	0.0854194	0.752711	1.50617	0.65	0.706355		0.465298		1		0.299541		0.325185	0.237044	0.193007	2.52844	FALSE
C1orf21	9		1.12315e-08	0	1.45894	1	1		1.66356		0.350141		0.585708		1.02182e-14	0	2.44313	1	0.397009	0.205879	0.153797	1.65233	FALSE
CLDND1	34		0.0455543	0	0.367649	1	0.7875		2.08719		0	0	2.97559	1	1		0.0156726		0.492025	0.330676	0.0364588	2.27845	FALSE
CLDN1	4		1.73169e-06	0	0.57029	1	8.1488e-10	0	1.49676	1	0.809188		0.336678		0.000774561	0.770544	0.417165	0.63	0.735274	0.164868	0.0917336	3.19513	FALSE
ELL2	15		0	0	0.836535	1	0	0	2.05408	1	0.956688		0.656086		1		0.295382		0.418798	0.180173	0.097501	2.90086	FALSE
ANAPC5	36		1.00506e-08	0	0.561132	1	0	0	4.34687	1	1		1.5153		0.000513602	0	1.14179	1	0.610977	0.186065	0.102951	4.3175	TRUE
CLDN10	2		0.05679	0	0.568248	1	0	0	1.96853	1	0.538255		0.552339		1		0.503277		0.564271	0.169222	0.133968	1.67933	FALSE
ARID5B	36		0.0175324	0	0.174474	1	0	0	2.72211	1	0	0	2.77479	1	1		0.299833		0.565175	0.266434	0.0580925	2.98343	FALSE
ELOVL5	22		2.53923e-13	0	0.72233	1	0	0	2.26875	1	1.40356e-12	0	1.215	1	1		1.09877		0.540643	0.173759	0.110139	3.28227	FALSE
ARL10	24		1.01391e-11	0	0.895782	1	4.93693e-15	0	1.95565	1	1		0.0756677		5.28004e-11	0	0.53629	1	0.446742	0.120241	0.0888631	3.08898	FALSE
C1orf43	33		0	0	0.569378	1	0	0	3.50395	1	0	0	2.0973	1	3.49435e-14	0	0.570478	1	0.5832	0.279715	0.0497982	5.06942	TRUE
ANAPC4	10		1.08449e-05	0	0.754796	1	1.41024e-09	0	3.76588	1	1		0.839722		1		0.467101		0.566229	0.127603	0.0529459	4.75802	TRUE
BET1	12		2.99688e-07	0	0.51875	1	0	0.155459	1.64332	0.95	1.16871e-08	0.0395479	0.429287	0.99	1		0.109811		0.547761	0.172343	0.147243	1.4998	FALSE
DHX38	9		3.03026e-10	0	0.787827	1	0.000497365	0.204298	1.25484	0.93	1		0.0364812		1		0.272184		0.502735	0.178815	0.0992658	3.92723	FALSE
EMG1	24		0	0	0.892134	1	0	0	3.05498	1	0	0	1.44734	1	1		0.564003		0.47944	0.265691	0.0811989	3.36923	FALSE
EMILIN2	3		1.17851e-05	0	1.06786	1	1.24458e-06	0.0720952	1.97495	0.98	7.2234e-06	0	0.822173	1	1		0.0521085		0.621866	0.153182	0.0978314	2.42159	FALSE
CLK1	47		0	0	0.426445	1	0	0	4.03771	1	0	0	3.92828	1	5.39586e-13	0	1.47912	1	0.462986	0.376647	0.0659103	4.72496	TRUE
ARPC2	60		0.00143261	0	0.404413	1	0	0	4.44893	1	0	0.0395479	1.25137	0.99	0.00068594	0	0.616661	1	0.657043	0.160946	0.0328985	4.73484	TRUE
ARPC4-TTLL3	22		0.0640628	0	1.01429	1	0	0	3.38401	1	0.00147277	0	1.0031	1	1		0.156125		0.764588	0.0948036	0.0615013	3.4009	FALSE
BAIAP2	12		6.47255e-05	0	1.02071	1	0	0	3.21	1	0	0	2.26084	1	0.00402327	0.753488	0.623533	0.64	0.569042	0.190506	0.0807502	3.48928	FALSE
ERP29	25		0	0	2.00405	1	0	0	1.95911	1	1		0.423548		1		0.0156636		0.914894	0.0574757	0.0110541	3.34849	FALSE
AFF4	15		0	0	1.1147	1	0.00166271	0	1.92356	1	0	0	1.21364	1	1		0.105434		0.504641	0.232771	0.0768423	2.50825	FALSE
CTSC	24		0	0	1.45251	1	0	0.0390774	2.30281	0.99	0	0	1.50011	1	1		0.0444614		0.59712	0.264526	0.0499941	3.13927	FALSE
ETFA	32		0.00167204	0	0.594872	1	0	0.155459	4.83416	0.95	5.59281e-09	0.848454	1.08472	0.59	1		0.851065		0.684157	0.185189	0.0455368	5.16191	FALSE
GFM1	15		1.82513e-05	0	0.654879	1	4.29709e-06	0	4.01579	1	1		0.720969		1.02182e-14	0	1.30301	1	0.463153	0.145429	0.127665	5.75458	TRUE
ASPH	14		0.000309864	0	1.24399	1	0	0	3.28185	1	4.56314e-05	0	0.615135	1	0.0573941	0.302041	0.706528	0.88	0.540651	0.0882309	0.0750895	4.1338	FALSE
CTSD	30		1.01432e-08	0	0.971833	1	0	0	2.43739	1	8.19612e-13	0	0.420224	1	1		0.123609		0.344965	0.0928433	0.0748095	1.9664	FALSE
AP1M2	7		0.0390649	0	0.310875	1	0	0	4.06861	1	1		0.133836		3.48307e-08	0.170043	0.685162	0.94	0.779771	0.0906782	0.0551657	3.88692	TRUE
BAD	12		1.04526e-06	0	0.708419	1	1.48791e-05	0.0390774	2.36026	0.99	1.42547e-05	0.0395479	0.713685	0.99	4.87785e-07	0	0.303812	1	0.835534	0.0995069	0.0305922	2.78426	FALSE
C3	10		1.04979e-05	0	0.213563	1	0	0	8.26097	1	0	0	1.06519	1	0	0	0.963436	1	0.417417	0.0433651	0.0384022	6.89831	TRUE
ADIRF	25		4.6462e-10	0	0.391462	1	0	0	2.36266	1	0	0	0.515891	1	7.71214e-12	0	0.718649	1	0.766358	0.169876	0.0530445	3.66945	FALSE
DDX5	58		0.000221706	0	0.946312	1	0	0	3.70079	1	1		0.377361		1		0.142694		0.677631	0.113426	0.0449408	3.41871	TRUE
C3orf49	15		7.26423e-11	0	1.45605	1	0	0	2.53629	1	0	0	1.40151	1	0.531128		0.211744		0.735651	0.145194	0.0715087	2.43059	FALSE
ASS1	15		0.0643708	0	0.373115	1	0	0	6.47649	1	0.289029		2.34966		0	0	1.35829	1	0.772249	0.0876426	0.0344762	6.38869	TRUE
CELF2	29		0.000123166	0	0.375613	1	0	0	2.57653	1	0.0192886	0	0.929457	1	3.43722e-08	0	0.934648	1	0.359415	0.143377	0.10893	3.64561	FALSE
C6orf62	50		2.13845e-06	0	0.609325	1	7.61441e-08	0	2.56617	1	0.000108207	0	2.86853	1	1		0.243926		0.575398	0.260114	0.0492396	2.63901	FALSE
CEBPZOS	24		3.80673e-11	0	0.789066	1	0	0.0720952	2.15311	0.98	3.08068e-13	0.0395479	1.28811	0.99	1		0.163898		0.555145	0.147909	0.106709	2.33369	FALSE
EWSR1	44		5.33451e-13	0	0.51191	1	0	0	3.42105	1	2.96834e-10	0	1.18924	1	1		0.49812		0.603518	0.0917781	0.0758172	3.44126	FALSE
CTNND1	20		4.22855e-07	0	0.78808	1	0	0	2.48997	1	0	0	1.71449	1	2.00099e-06	0	1.24872	1	0.329506	0.205397	0.123492	4.50199	FALSE
AKAP13	35		5.15331e-06	0	0.578974	1	0	0	3.42513	1	9.50208e-11	0	0.97143	1	0	0	0.990279	1	0.235817	0.13582	0.0935481	3.7663	FALSE
CTNNA1	18		2.52922e-05	0	0.451678	1	0	0	5.01976	1	0	0	1.459	1	5.61608e-09	0	0.341983	1	0.743634	0.106966	0.0454536	4.73973	TRUE
BANK1	6		0.000123003	0	0.413178	1	4.39109e-07	0.129398	2.35444	0.96	0.0696073	0.470884	1.03724	0.8	1		0.47967		0.479866	0.187473	0.136699	4.76045	FALSE
EPB41L2	10		5.25462e-06	0	1.19091	1	0.388806		0.633031		2.38931e-13	0	1.35114	1	0.0379375	0.036918	0.619469	0.99	0.282452	0.192071	0.150231	3.26347	FALSE
AKAP12	10		4.55779e-06	0	0.659118	1	0	0	1.68071	1	0	0	1.13545	1	1		0.132463		0.50151	0.170146	0.0948114	1.69723	FALSE
ARPC5	41		2.76626e-06	0	0.520054	1	0.0555796	0	0.544066	1	0.000584134	0	1.28276	1	1		0.465007		0.579775	0.389041	0.0303984	1.82037	FALSE
AHSA2P	11		0	0	1.23856	1	4.24817e-15	0	2.09403	1	0.000108207	0	0.398674	1	0.177987	0.341039	0.802441	0.86	0.512721	0.186561	0.128897	2.30609	FALSE
BAZ2A	16		2.04249e-12	0	1.24899	1	0.710977		1.04736		5.00199e-06	0.15545	1.70289	0.95	1.19675e-08	0	1.05572	1	0.298446	0.178174	0.113376	4.14261	FALSE
EPB41L3	6		4.10657e-15	0	1.03144	1	2.01671e-12	0	1.76794	1	0	0	2.34659	1	1		0.158708		0.38575	0.218965	0.106458	2.07781	FALSE
CHKB	22		1.65442e-13	0	0.792675	1	0	0	3.79486	1	4.26423e-06	0.831366	1.13615	0.6	0	0	0.816749	1	0.573303	0.157752	0.0895437	3.2225	TRUE
AGTRAP	13		0.166604	0	0.931716	1	2.87827e-11	0	3.13979	1	1		0.898788		1		0.133874		0.779715	0.119769	0.062495	5.79087	FALSE
CHD9	24		0	0	1.25168	1	0	0	1.20671	1	0.000885911	0	0.37115	1	1		0.254957		0.211856	0.172035	0.0904497	2.58575	FALSE
CHD3	14		4.10657e-15	0	1.21733	1	0.0136149	0	0.78395	1	0	0	2.33812	1	1		0.0784429		0.235897	0.160076	0.131846	2.53607	FALSE
EPHX1	7		0.0705788	0	0.336473	1	2.52922e-07	0.129398	2.79358	0.96	1		0.0650987		1		0.188167		0.788678	0.0819076	0.0471911	2.68596	FALSE
EPS8	19		0.0337566	0	0.599838	1	0	0	3.88106	1	3.65129e-06	0	1.7807	1	5.56119e-10	0	0.638869	1	0.636343	0.157058	0.0714375	3.19778	TRUE
AGAP3	2		0.000341875	0	0.758743	1	0.0820193	0.101965	0.766583	0.97	1		0.296039		0.0175889	0.0947818	0.964476	0.97	0.266604	0.229885	0.148786	2.72768	FALSE
CHD1L	12		0.000302494	0	0.382437	1	1		0.685045		9.46127e-05	0	0.750939	1	1		0.0955511		0.311774	0.145238	0.0933221	4.51789	FALSE
CHCHD7	25		4.10657e-15	0	0.650398	1	0	0.252424	2.19938	0.91	8.54072e-05	0.15545	1.5112	0.95	0.275012	0.216409	1.30468	0.92	0.540601	0.229789	0.184461	3.66304	FALSE
AFG3L2	10		0.0372696	0	0.419811	1	6.56659e-09	0	3.80875	1	1		0.269031		1		0.136274		0.572795	0.0996539	0.0668884	4.01618	TRUE
ERGIC3	35		0	0	0.841934	1	0	0	3.28175	1	0.000183159	0	0.605436	1	1		0.0884005		0.786392	0.0580476	0.0392631	5.55202	FALSE
CHCHD2	50		0.191991	0	0.706359	1	1.70621e-05	0	2.30093	1	1		0.0978655		1		0.443355		0.789338	0.0778939	0.0337061	3.53661	FALSE
CFLAR	35		0	0	1.9341	1	0	0	2.45899	1	0	0	2.06397	1	5.15194e-06	0.0678899	0.848212	0.98	0.299142	0.199101	0.103041	3.79148	FALSE
CFI	12		3.97696e-13	0	0.55366	1	0	0	3.29364	1	0	0	0.835711	1	0.0287461	0.036918	0.508599	0.99	0.649371	0.104437	0.0946894	2.79455	FALSE
EXOC7	6		2.00681e-05	0	0.403886	1	0	0	3.44166	1	0.690121		1.03489		1		0.27767		0.621504	0.232739	0.0468354	3.98839	FALSE
CLK3	25		0.00134912	0	0.528836	1	0	0	3.94447	1	0.758261		1.52511		1		0.273376		0.647349	0.149229	0.0513668	5.61463	TRUE
EIF5A	46		0.131937	0	0.795458	1	0	0	2.2377	1	1		0.490727		1		0.350147		0.514345	0.0973799	0.0929167	4.83525	FALSE
APBB1IP	22		0	0	1.17229	1	0	0	3.13951	1	0	0.0395479	0.989686	0.99	0	0	0.887465	1	0.708041	0.124504	0.0538174	2.87593	FALSE
DYNC1I2	22		0	0	1.77443	1	0	0.180814	1.65853	0.94	2.35393e-11	0	1.34159	1	1		0.0517967		0.567341	0.320631	0.0504579	2.64097	FALSE
DOCK2	8		1.81719e-06	0	0.767729	1	9.2266e-05	0	1.71071	1	6.73264e-06	0.101705	0.994742	0.97	0.966762		0.922205		0.346436	0.1774	0.12524	4.39307	FALSE
CPQ	7		0.000246509	0	1.23322	1	2.59106e-06	0	2.73422	1	0	0	1.20161	1	0.0379375	0.216409	0.62736	0.92	0.538562	0.175445	0.107652	2.88182	FALSE
CPSF3	8		0	0	1.04626	1	1.11245e-13	0.129398	2.67876	0.96	4.92883e-07	0	0.619928	1	1		0.719497		0.800933	0.102242	0.0680889	2.2797	FALSE
BTF3	56		1.96835e-05	0	0.314334	1	0	0	2.32638	1	7.58607e-10	0	0.660002	1	1		0.356566		0.523029	0.235347	0.168745	2.69651	FALSE
DNM3	5		2.0624e-11	0	0.674614	1	0	0	2.45442	1	0.976851		0.755683		1		0.0688896		0.297886	0.0959515	0.0774039	1.96587	FALSE
COL1A2	8		0.203196	0	0.202552	1	0	0	9.22909	1	0	0	2.45455	1	0.676701		0.67904		0.350602	0.0607006	0.0456813	10.3313	TRUE
DYNLRB1	33		1.00575e-05	0	0.862187	1	1		2.3729		1		0.413205		1		0.350583		0.733318	0.170636	0.0522019	2.83357	FALSE
DZIP3	6		1.91655e-06	0	1.17276	1	0.00936174	0.612139	2.72738	0.73	0.0602481	0.226085	1.33677	0.92	0.00706728	0.036918	0.914308	0.99	0.458034	0.164411	0.112912	3.19175	FALSE
CPVL	11		1.97145e-14	0	0.649475	1	0	0	3.87129	1	4.17934e-07	0	0.654981	1	0	0	0.61144	1	0.76892	0.0839951	0.0427425	3.73273	TRUE
APOBEC3G	12		0.111804	0	0.598084	1	4.00188e-11	0	2.46007	1	0.000123762	0.180137	0.798481	0.94	1		0.497092		0.562765	0.187615	0.141233	3.38732	FALSE
BTK	4		3.51534e-05	0	0.980329	1	6.30884e-06	0.101965	1.82167	0.97	0.761565		0.451923		0.868949		0.361665		0.620695	0.159059	0.108688	2.09829	FALSE
EAPP	25		0	0	0.298066	1	0	0	3.0168	1	0	0	1.00923	1	0	0	0.806766	1	0.758669	0.132506	0.0696045	2.9919	FALSE
COL12A1	4		2.45914e-09	0	0.552982	1	0.322672		0.962584		0.0464343	0	0.351244	1	1		0.134436		0.333242	0.192453	0.129279	2.86672	FALSE
CRADD	9		0.00734448	0	1.92418	1	5.79647e-05	0	1.14833	1	1		0.181833		1		1.10059		0.512062	0.21379	0.0953466	1.86091	FALSE
BTLA	4		2.68863e-11	0	1.45694	1	0.181617		1.36052		3.387e-09	0	1.45915	1	0.720137		0.259735		0.644342	0.252349	0.0590728	3.18145	FALSE
ANKRD65	4		0	0	1.36183	1	0	0	1.29836	1	1		0.131617		0.394674		0.325766		0.569549	0.213092	0.0976262	2.3669	FALSE
EBF1	12		0.189662	0	0.334601	1	0	0	4.85843	1	0.0444653	0.356142	1.55503	0.86	1		0.377386		0.626307	0.1022	0.0512326	3.05028	TRUE
AP5Z1	3		7.24733e-06	0	0.756733	1	0.00304139	0	1.37287	1	0.543444		0.246636		1		0.384997		0.424417	0.19571	0.0816026	3.55934	FALSE
AREG	23		0.0452462	0	0.395406	1	0	0	3.15862	1	0	0	1.01997	1	0.000514337	0	0.403781	1	0.828306	0.091131	0.0494808	3.57613	FALSE
ANXA11	26		0.1309	0	0.249556	1	0	0	5.78733	1	0.00229495	0.071989	1.20181	0.98	0	0	1.32068	1	0.603755	0.201988	0.0622448	5.36727	TRUE
ANXA2	46		0.00333743	0	0.700627	1	1.9107e-05	0	9.72678	1	1		0.598741		0	0	3.03154	1	0.483674	0.164708	0.0952639	12.2411	TRUE
CPNE1	37		2.67469e-05	0	0.300403	1	0	0	3.66731	1	1		0.23774		0.90963		0.6591		0.530029	0.237373	0.113936	6.61847	TRUE
AP1G2	23		0.125341	0	0.431383	1	3.41477e-05	0.155459	1.81589	0.95	0.779248		1.01538		1		0.319106		0.271718	0.129499	0.123873	2.89198	FALSE
AP2B1	17		0.0618412	0	0.687956	1	5.15283e-09	0	2.02934	1	0.475622		0.9448		1		0.206539		0.384777	0.255226	0.183211	3.35751	FALSE
COX7B	43		6.92242e-05	0	1.34542	1	0.00028585	0	1.8746	1	0.368906		0.904513		1		0.223667		0.893994	0.0775118	0.0107403	0.928331	FALSE
BOLA3	16		0	0	1.49776	1	0	0	2.27156	1	1		0.0592804		1		0.0855618		0.98758	0.00777643	0.00440232	3.83621	FALSE
BORCS5	5		3.76294e-07	0	0.920032	1	8.73993e-10	0.129398	2.39025	0.96	4.9106e-08	0	1.3603	1	0.512844		0.4736		0.606761	0.202078	0.102379	2.42766	FALSE
DSTN	36		0	0	1.6668	1	0	0	2.28744	1	5.00199e-06	0	1.00591	1	0.294172	0	0.139879	1	0.834867	0.112661	0.0157959	3.02267	FALSE
COX4I1	57		0	0	0.750122	1	0	0	2.80915	1	0.082616	0	0.632515	1	1		0.0745453		0.874027	0.0400164	0.0241156	1.6776	FALSE
BRWD1	19		9.31855e-05	0	0.746664	1	3.26029e-09	0	3.29266	1	3.80927e-06	0.294982	1.54156	0.89	1		0.524347		0.479845	0.153909	0.089495	4.09309	FALSE
CORO1B	39		0	0	0.659212	1	0	0	2.58572	1	0	0	0.653188	1	1.17977e-06	0	0.312519	1	0.471726	0.121413	0.0374226	4.13895	FALSE
AOAH	12		5.35615e-08	0	0.967289	1	7.2792e-16	0	2.85712	1	1.86134e-05	0.101705	1.46357	0.97	0.126124	0	0.603698	1	0.437326	0.138308	0.0996593	4.65872	FALSE
ANXA8L1	3		3.75839e-06	0	0.390211	1	4.24574e-09	0	1.91829	1	0.737585		0.362404		0.0164595	0	0.410781	1	0.649635	0.207727	0.0526266	1.02302	FALSE
DUOXA2	3		0	0	0.757819	1	0	0	2.98226	1	0	0	1.00236	1	1		0.0823029		0.568034	0.189593	0.0739603	0.0112739	FALSE
DUS3L	6		0.00020145	0	0.71065	1	3.40921e-10	0.318936	2.95923	0.88	1		0.114549		0.0031389	0.036918	0.757023	0.99	0.685093	0.114178	0.0728581	4.39502	FALSE
DOP1A	5		1.692e-08	0	0.969231	1	1		0.352522		1		0.415055		1		0.0914038		0.179043	0.147822	0.128975	3.86082	FALSE
DUSP12	11		0.00679341	0	0.435958	1	0.676154		1.96803		1.15091e-11	0.294982	1.61888	0.89	1		0.128503		0.639851	0.277108	0.0375518	0.616606	FALSE
BLVRA	14		0.0558502	0	0.348074	1	0	0.665217	5.44296	0.3	0.000112772	0.848454	1.46712	0.59	1		0.490219		0.868878	0.0864176	0.013717	8.86258	FALSE
DUSP1	49		5.72024e-13	0	0.14643	1	0	0	3.02255	1	0	0	0.868328	1	0	0	1.1665	1	0.338801	0.126084	0.0960438	2.84158	FALSE
DUT	27		0.0336369	0	0.452998	1	0	0.0390774	1.26295	0.99	0	0.582364	1.95252	0.74	1		0.413892		0.394568	0.289039	0.0572769	4.48203	FALSE
AP2M1	39		0	0	1.4952	1	0	0	3.14255	1	0	0	3.67907	1	0	0	1.15341	1	0.465876	0.391746	0.0306372	3.31641	FALSE
CSNK1A1	31		0.142259	0	0.772562	1	0	0	3.07386	1	0	0	0.878749	1	0.00252381	0.036918	1.22586	0.99	0.623346	0.14396	0.101875	4.59209	FALSE
COG8	6		1.10558e-06	0	1.08717	1	0.0997812		0.213532		8.35737e-06	0.0395479	1.00904	0.99	1		0.000719368		0.696047	0.300412	0.00354053	0.401741	FALSE
BIN1	19		0	0	0.563262	1	0	0	3.28216	1	0	0	2.35245	1	0	0	1.95901	1	0.485384	0.208459	0.111626	3.90499	FALSE
EIF1	63		0.0400336	0	0.431114	1	0	0	2.38799	1	1		0.27496		1		0.0395708		0.849463	0.0236697	0.0177951	2.58536	FALSE
CSF1	4		0.0195265	0	0.429501	1	2.09255e-07	0	1.76031	1	0	0	1.08253	1	1		0.175928		0.439466	0.177729	0.0770981	1.95507	FALSE
CSF3R	5		0.000228211	0	0.531734	1	3.37495e-11	0	2.09392	1	0.00231933	0.203749	1.12706	0.93	1.9724e-05	0.036918	0.375557	0.99	0.490821	0.145094	0.0899486	1.96531	FALSE
ARHGAP6	6		1.6786e-05	0	0.617379	1	0.10455		1.15059		0.00524173	0.710644	0.897819	0.67	0.919717		0.42585		0.384108	0.256354	0.171225	1.43396	FALSE
CMC1	31		0	0	0.677413	1	0	0	2.0844	1	0	0	2.24578	1	1.40988e-05	0	0.477043	1	0.381865	0.21676	0.11637	2.2274	FALSE
ARHGEF1	24		1.06847e-06	0	0.457984	1	0	0	2.9619	1	6.365e-10	0	1.31613	1	2.70563e-07	0	1.71658	1	0.374942	0.243794	0.0956443	3.78381	FALSE
BID	16		2.9004e-06	0	0.725093	1	0	0	3.0543	1	5.00199e-06	0.0395479	0.741347	0.99	1		0.174573		0.83727	0.0732469	0.0612726	4.83955	FALSE
DLD	21		3.20954e-05	0	0.354319	1	4.29797e-10	0.204298	2.9827	0.93	3.19101e-09	0	0.366687	1	0	0	0.603722	1	0.793248	0.0751995	0.0493984	2.97375	FALSE
DISP1	9		4.66811e-05	0	1.04669	1	0.00163699	0.228154	1.88993	0.92	0.0472371	0.356142	0.956712	0.86	1		0.761777		0.254711	0.183984	0.118864	3.92344	FALSE
EIF3A	34		0	0	1.39578	1	0	0	3.11097	1	5.01217e-06	0	1.14837	1	0	0	1.30833	1	0.572642	0.165502	0.0757821	4.2629	FALSE
CLN3	12		0.000251611	0	1.35466	1	2.00262e-13	0.101965	3.91435	0.97	2.27062e-12	0.071989	1.56883	0.98	0.357707		0.265038		0.715555	0.0992394	0.0372405	5.52288	FALSE
EIF3F	46		4.10657e-15	0	0.484903	1	0	0	1.99948	1	1		0.0864168		1		0.0595432		0.444791	0.22002	0.153441	1.87834	FALSE
C17orf49	28		0.0388905	0	0.815889	1	0	0	2.06457	1	0.571923		0.611539		1		0.989124		0.636522	0.111607	0.0879431	2.35777	FALSE
EIF3G	43		8.9744e-08	0	0.354282	1	0	0	3.71188	1	1		0.177673		1		0.0931393		0.75678	0.0682719	0.0422952	3.66233	TRUE
EIF3H	39		0	0	0.708639	1	0	0	3.81747	1	0	0	1.16362	1	1		0.188718		0.903179	0.054208	0.0147496	3.41914	TRUE
ARHGEF39	11		0.00377799	0	0.69362	1	0.0380672	0.557139	0.97372	0.76	1		0.592336		1		0.00683611		0.631166	0.250614	0.0396243	3.93061	FALSE
EIF4A2	46		0.00565346	0	0.593158	1	0	0	3.1793	1	1.16699e-08	0	1.3965	1	1.68381e-11	0	1.98298	1	0.473075	0.22701	0.18714	5.37986	FALSE
DIPK1A	61		0	0	1.38899	1	1		1.1372		0	0	6.54432	1	1		0.0906161		0.435791	0.253417	0.11784	10.4538	FALSE
EIF4B	28		0.0224911	0	0.54006	1	0	0	2.90088	1	3.79113e-11	0	1.24196	1	0.268967	0.804149	0.352577	0.39	0.686891	0.126335	0.0517745	2.77187	FALSE
EI24	22		0.000238797	0	0.557058	1	4.61115e-07	0.0390774	3.04451	0.99	0	0	1.60278	1	1		0.209938		0.68894	0.0979099	0.0462195	3.25334	FALSE
ARF4	34		8.00177e-15	0	0.635643	1	0	0	2.62457	1	0	0	0.980736	1	5.61336e-07	0	0.643315	1	0.646431	0.175322	0.046532	3.19723	FALSE
EHMT1	20		0.168079	0	0.475327	1	3.24272e-10	0.483249	2.00004	0.2	0.471584		0.867735		1		0.302004		0.313629	0.198012	0.090855	2.69599	FALSE
CRYAB	12		1.06315e-09	0	0.443445	1	0	0	4.13752	1	4.4418e-15	0	2.26749	1	0	0	1.08834	1	0.674328	0.188601	0.069249	7.235	TRUE
EDF1	46		0.103309	0	0.367952	1	0	0	2.30736	1	3.66457e-06	0	1.73127	1	0.0957882	0	0.421641	1	0.630942	0.27491	0.0277311	2.06668	FALSE
EEA1	24		2.28741e-09	0	0.960436	1	2.18612e-09	0	2.30456	1	0	0	1.08688	1	0.000581655	0.586115	1.02959	0.73	0.413282	0.173177	0.104487	4.13256	FALSE
EEF1A1	62		0.0357658	0	0.404464	1	1		0.0326525		1		0.0157205		1		0.0450829		0.376412	0.0603463	0.0510273	29.7563	FALSE
CREM	20		3.86319e-06	0	0.772033	1	0	0	1.94655	1	1.75134e-08	0	2.13869	1	0.0482412	0	0.713018	1	0.445405	0.160482	0.146202	3.0164	FALSE
COA1	29		8.00177e-15	0	0.341599	1	0	0	3.26412	1	1		0.328025		1		0.0955991		0.465636	0.137322	0.0873638	4.56538	FALSE
CRIP1	39		0.0349656	0	0.398409	1	8.39976e-05	0	2.06032	1	1		0.487137		1		0.211261		0.425519	0.309413	0.0809423	3.51826	FALSE
ARFIP2	10		0.00619264	0	0.789551	1	4.81852e-05	0.180814	2.44698	0.94	0.00669719	0.203749	1.17541	0.93	0.531128		0.415818		0.612236	0.191189	0.086871	2.65852	FALSE
EEF1B2	51		0	0	0.712914	1	0	0	2.84312	1	1.34612e-08	0	2.3133	1	1		0.402051		0.82279	0.0960604	0.0409503	2.88138	FALSE
EEF1G	58		2.23126e-06	0	0.312206	1	0	0	3.41538	1	0	0	0.460215	1	0.00260689	0	0.141289	1	0.607495	0.0565095	0.0519856	7.77622	FALSE
ARHGAP1	7		0.0827784	0	0.964636	1	0.00477281	0.501711	2.56283	0.79	1		0.0931845		2.00597e-14	0	0.465453	1	0.760535	0.124043	0.0503543	2.56089	FALSE
DNAJC4	16		0.0644518	0	0.647195	1	0	0	3.05665	1	1		0.196013		0.127805	0.416539	0.566686	0.82	0.73274	0.120048	0.0680905	3.11639	FALSE
ANKRD11	8		0.0659587	0	0.631325	1	1		0.119584		0.0383911	0.710644	0.950868	0.67	1		0.364317		0.246207	0.199954	0.0887592	3.64298	FALSE
EFEMP2	6		0.122919	0	0.454583	1	1.4373e-14	0	3.02446	1	3.11404e-12	0	0.873247	1	1		0.214906		0.684787	0.0886184	0.0473909	2.23561	FALSE
EFTUD2	18		0.0224865	0	0.571259	1	0	0	4.53683	1	4.88143e-12	0	1.71939	1	1		0.275671		0.643697	0.142506	0.0526888	7.0681	TRUE
EGLN1	2		0.132584	0	0.896674	1	0.102917		0.970709		1		0.985206		0.331781		0.335431		0.507598	0.225773	0.0998519	2.37216	FALSE
C11orf54	15		0	0	1.01551	1	0	0	2.94228	1	9.07415e-06	0.0395479	1.0594	0.99	1.18019e-10	0	0.457267	1	0.552663	0.154772	0.0875977	3.5465	FALSE
DNAJC3	18		0.00515845	0	0.681588	1	0	0	3.32651	1	0	0.101705	0.882358	0.97	0.389794		0.439379		0.825898	0.0851035	0.034873	5.97356	FALSE
CRTAP	19		0.000273257	0	0.83133	1	0	0	2.76253	1	0	0	1.19139	1	1		0.0841102		0.680617	0.0815364	0.0499078	1.9189	FALSE
ANKRD10	31		4.54105e-06	0	0.475304	1	0	0	1.80403	1	0.0110713	0.0395479	1.06923	0.99	0.00150322	0	0.375333	1	0.395329	0.202857	0.0968547	4.25452	FALSE
CRYL1	17		2.86418e-07	0	0.588002	1	0	0.101965	3.28199	0.97	0	0.0395479	2.12825	0.99	1		0.212424		0.571634	0.282017	0.0687275	4.00031	FALSE
F8	9		0.000291048	0	1.81157	1	9.13057e-13	0	3.11988	1	6.08602e-07	0	1.5697	1	0.000410452	0	1.40713	1	0.48869	0.167025	0.0803929	2.27854	FALSE
CERS2	22		0.00463293	0	0.533546	1	0	0	4.6626	1	0.0367442	0	0.465541	1	1		0.264763		0.881232	0.0416934	0.0268284	5.12597	TRUE
ADGRF5	9		0.00158846	0	0.430149	1	4.46616e-08	0.155459	2.47479	0.95	0.844925		0.293154		4.19477e-09	0.0947818	0.741924	0.97	0.366212	0.175368	0.0888871	1.59632	FALSE
ATP5PO	45		1.68538e-09	0	1.09761	1	0	0	3.61342	1	1		0.232336		1.24621e-12	0	1.15311	1	0.889397	0.0475623	0.0247632	2.78291	TRUE
ABITRAM	13		0.000258669	0	0.609299	1	0	0	2.49641	1	1		0.15352		1		0.186959		0.655442	0.171075	0.0564419	3.82907	FALSE
ATP5F1A	51		0	0	0.791811	1	0	0	4.97717	1	1		0.270043		1		0.16045		0.866401	0.0455248	0.0254198	6.07915	TRUE
FNDC3A	13		8.29355e-11	0	1.56827	1	0	0	2.13847	1	0.102171	0.249377	0.687125	0.91	0	0	1.58955	1	0.422905	0.135349	0.0904935	2.77972	FALSE
CD55	34		0.0828522	0	0.62268	1	0	0	3.9269	1	0	0	1.43673	1	0	0	1.12302	1	0.652679	0.0986238	0.0479012	3.3811	TRUE
CD52	8		7.53731e-05	0	5.53547	1	0	0	5.03704	1	1		1.57497		1		0.0597961		0.564958	0.409904	0.0251383	5.21863	TRUE
CD48	15		0.000315493	0	0.934255	1	0	0	2.14322	1	0.00131438	0	0.897656	1	1		0.165641		0.720811	0.174025	0.0697267	1.91018	FALSE
CYTH1	15		5.59235e-05	0	0.67281	1	0	0	3.62543	1	0	0	1.15297	1	0	0	0.946598	1	0.511079	0.17236	0.0954534	2.99605	TRUE
ATP5F1C	42		1.14605e-07	0	0.744683	1	0	0	3.81795	1	0	0	3.142	1	1		0.517605		0.593619	0.129349	0.0982911	3.83105	TRUE
CASD1	7		2.28806e-06	0	0.708945	1	0	0	2.43168	1	2.56281e-09	0	0.684923	1	1		0.0685626		0.646277	0.124651	0.0553643	4.28933	FALSE
CD47	38		0.0951571	0	1.39468	1	0	0	4.97691	1	0	0	3.43892	1	6.69909e-12	0	1.02357	1	0.639488	0.204986	0.0517041	5.15542	TRUE
CD44	27		0	0	0.93744	1	0	0	2.85946	1	0	0	3.28765	1	1		0.857911		0.426906	0.24443	0.0573364	6.08523	FALSE
CASP17P	8		9.43582e-09	0	1.3703	1	2.00457e-05	0.918	2.22826	0.55	1		0.689189		0.259268	0.47378	0.730782	0.21	0.568755	0.165	0.132157	2.93038	FALSE
ABI3BP	6		3.65206e-06	0	0.624807	1	0	0	5.44416	1	0.0370641	0.071989	1.18496	0.98	1		0.645135		0.450326	0.0596036	0.0522083	5.55254	TRUE
CD37	24		0	0	0.825298	1	0	0	3.30343	1	0	0	1.08955	1	0	0	0.741637	1	0.732561	0.130046	0.0736334	3.35016	FALSE
FOS	49		0	0	0.783145	1	0	0	2.82508	1	0	0	0.968479	1	0	0	0.788681	1	0.123844	0.0799343	0.0657015	2.24301	FALSE
ABI1	23		0	0	0.745751	1	0	0	3.00061	1	0	0	2.44485	1	0	0	1.34022	1	0.386727	0.281306	0.133351	2.56894	FALSE
CD36	12		3.12737e-08	0	0.310263	1	0	0	4.0586	1	0	0	2.6397	1	1		0.351762		0.575699	0.225327	0.0795065	3.79241	TRUE
CD27	19		0	0	3.02306	1	0	0	1.50683	1	0	0	3.0429	1	0	0.036918	0.788407	0.99	0.298052	0.235519	0.115816	2.12118	FALSE
FMC1-LUC7L2	34		0	0	1.04092	1	7.2792e-16	0.0390774	3.47718	0.99	4.06891e-12	0	0.765318	1	0	0	0.676978	1	0.58095	0.115769	0.0806113	3.69265	FALSE
ATP2C1	7		1.02513e-05	0	1.3528	1	3.39009e-05	0.0390774	2.19416	0.99	1		0.310536		1		0.512566		0.369369	0.17168	0.108858	4.67978	FALSE
CD58	19		0.000551161	0	0.894274	1	0	0	4.09229	1	1		0.674632		1		0.280273		0.771428	0.121436	0.0437886	5.04417	TRUE
ATP6AP1	26		0.144788	0	0.726843	1	0	0	3.21915	1	0.0933593	0	0.615054	1	0.00671784	0	0.588111	1	0.807954	0.051728	0.0423815	2.87902	FALSE
DAZAP2	50		0	0	0.543353	1	0	0	2.28994	1	0	0	0.827078	1	0	0	0.303553	1	0.519103	0.163768	0.0659624	1.30818	FALSE
CD74	48		0	0	0.297005	1	1		3.91082		1		0.177174		1		0.303932		0.18333	0.122295	0.0972205	18.8221	FALSE
ACAP1	22		1.83205e-13	0	0.687608	1	0.03912	0.836835	1.96307	0.4	0	0	1.8365	1	0	0	1.38681	1	0.574607	0.10927	0.0873123	3.93186	FALSE
CD68	12		0	0	1.15868	1	3.00055e-11	0	2.63579	1	1		0.314067		5.23193e-15	0	0.714078	1	0.582383	0.230865	0.0643682	2.14804	FALSE
CAPN2	33		3.18184e-10	0	0.616278	1	0	0	4.73964	1	0	0	1.96731	1	0.0437832	0.036918	0.380694	0.99	0.742766	0.140463	0.0227218	4.60615	TRUE
FGF7	5		0	0	0.790312	1	0	0	1.7104	1	0	0	2.29138	1	3.12742e-08	0.804149	0.552345	0.39	0.697795	0.179702	0.0944622	2.88856	FALSE
ADH1C	11		0.155026	0	0.206338	1	0	0	3.13932	1	4.4418e-15	0	0.840517	1	1.0536e-06	0	0.296545	1	0.896224	0.0524615	0.0154509	3.09851	FALSE
FGFR1OP2	18		0	0	0.648025	1	0	0	2.43471	1	1.72066e-08	0	1.45391	1	0.527463		0.66448		0.664248	0.264208	0.0445132	3.55134	FALSE
[truncated: 8,861 more rows]

## Sheet: table4D
geneR1A_uniq	num_onts	sub_col	chi2_pval_adj_scZ	perm_pval_adj_scZ	max_abs_median_scZ	perm_cdf_scZ	chi2_pval_adj_svd_z0	perm_pval_adj_svd_z0	max_abs_median_svd_z0	perm_cdf_svd_z0	chi2_pval_adj_svd_z1	perm_pval_adj_svd_z1	max_abs_median_svd_z1	perm_cdf_svd_z1	chi2_pval_adj_svd_z2	perm_pval_adj_svd_z2	max_abs_median_svd_z2	perm_cdf_svd_z2	f0	f1	f2	gene_max_diff	sig
[truncated: 4,685 more rows]

[truncated: 4 more sheets: table4E, table4F, table4G, table4H]
