# Supplementary material for: RNA splicing programs define tissue compartments and cell types at single-cell resolution
Source: eLife journal article supplement (doi:10.7554/elife.70692), 2021-09-13
Supplement: supp [file elife-70692-supp-v1.zip › elife_poa_e70692_Supplementary_file_4.csv]

gene	lemur_coord	mouse_coord	end	let	chr	strand	evec	site_rank	AS_annot	exon_ann	lemur_ever_sig	mouse_ever_sig	site_rank_mouse	site_rank_lemur	is.5UTR	is.3UTR	f0	f1	f2	ever_sig
ANXA1	36253173	20378488	73165116	B	chr9	+	1	3	0	TRUE	0	0	NA	NA	FALSE	FALSE	0.511421944958936	0.192818088634874	0.100942771930588	0
ANXA1	36253266	20378395	73165209	A	chr9	+	1	2	0	TRUE	1	0	NA	2	FALSE	FALSE	0.511421944958936	0.192818088634874	0.100942771930588	1
ANXA1	36255340	20376709	73167497	B	chr9	+	1	1	0	TRUE	0	0	NA	NA	FALSE	FALSE	0.511421944958936	0.192818088634874	0.100942771930588	0
ARL6IP1	14151460	118127134	18798701	A	chr16	-	1	2	0	TRUE	0	0	NA	NA	FALSE	FALSE	0.713819860850808	0.172975810216207	0.0573048203061643	0
ARL6IP1	14152178	118126515	18798044	B	chr16	-	1	3	0	TRUE	0	0	NA	NA	FALSE	FALSE	0.713819860850808	0.172975810216207	0.0573048203061643	0
ARL6IP1	14156883	118120410	18793370	B	chr16	-	1	1	0	TRUE	0	0	NA	NA	FALSE	TRUE	0.713819860850808	0.172975810216207	0.0573048203061643	0
ATP5F1C	24689772	10056160	7807659	B	chr10	+	1	2	1	TRUE	0	1	2	NA	FALSE	TRUE	0.470709393210984	0.353868514875281	0.109228580248976	1
ATP5F1C	24690410	10056769	7807010	A	chr10	+	1	3	0	TRUE	0	1	1	NA	FALSE	TRUE	0.470709393210984	0.353868514875281	0.109228580248976	1
ATP5F1C	24692797	10058995	7802854	A	chr10	+	1	1	1	TRUE	0	1	3	NA	FALSE	FALSE	0.470709393210984	0.353868514875281	0.109228580248976	1
ATP5MG	99457818	44920609	118401717	A	chr11	+	1	2	1	TRUE	0	0	NA	NA	FALSE	FALSE	0.974834535232518	0.00916659625910986	0.00715047401700581	0
ATP5MG	99462903	44914810	118406937	B	chr11	+	1	1	1	TRUE	0	0	NA	NA	FALSE	FALSE	0.974834535232518	0.00916659625910986	0.00715047401700581	0
ATP5PD	7071037	115416077	75039271	B	chr17	-	1	2	1	TRUE	0	0	NA	NA	FALSE	TRUE	0.7873179500184	0.112469890906324	0.046467524765324	0
ATP5PD	7071251	115415879	75039063	B	chr17	-	1	3	0	TRUE	0	1	2	NA	FALSE	TRUE	0.7873179500184	0.112469890906324	0.046467524765324	1
ATP5PD	88872961	115417839	75042181	A	chr17	-	1	1	1	TRUE	0	0	NA	NA	FALSE	FALSE	0.7873179500184	0.112469890906324	0.046467524765324	0
BAZ1A	49560673	54985807	34874662	B	chr14	-	1	1	1	TRUE	0	0	NA	NA	TRUE	FALSE	0.550863779805521	0.145398968277748	0.1021746971223	0
BAZ1A	49561161	54986162	34875138	A	chr14	-	1	2	0	TRUE	0	0	NA	NA	TRUE	FALSE	0.550863779805521	0.145398968277748	0.1021746971223	0
C12orf57	104064579	124740694	6944476	B	chr12	+	1	2	1	TRUE	0	0	NA	NA	TRUE	FALSE	0.898871529367581	0.0641582020458747	0.0300137043116152	0
C12orf57	104064864	124740919	6944173	A	chr12	+	1	1	1	TRUE	0	0	NA	NA	TRUE	FALSE	0.898871529367581	0.0641582020458747	0.0300137043116152	0
CCT4	8908485	23003136	61868706	B	chr2	-	1	2	0	TRUE	0	0	NA	NA	FALSE	FALSE	0.528719914633482	0.190819477445831	0.145842885717875	0
CCT4	8915888	22997602	61877052	B	chr2	-	1	1	0	TRUE	0	0	NA	NA	FALSE	FALSE	0.528719914633482	0.190819477445831	0.145842885717875	0
CD55	NA	130449562	207336693	B	chr1	+	1	1	0	TRUE	0	0	NA	NA	FALSE	FALSE	0.608188439164992	0.116532981612184	0.111018948979564	0
CD55	31885734	130447618	207339417	A	chr1	+	1	2	1	TRUE	0	0	NA	NA	FALSE	FALSE	0.608188439164992	0.116532981612184	0.111018948979564	0
CIRBP	10405777	80170694	1271981	B	chr19	+	1	2	0	TRUE	0	0	NA	NA	FALSE	TRUE	0.585802829671818	0.209440293725392	0.0720298602045518	0
CIRBP	10405847	80170764	1272051	A	chr19	+	1	3	1	TRUE	0	0	NA	NA	FALSE	TRUE	0.585802829671818	0.209440293725392	0.0720298602045518	0
CIRBP	10408183	NA	1274307	B	chr19	+	1	1	1	TRUE	0	0	NA	NA	FALSE	TRUE	0.585802829671818	0.209440293725392	0.0720298602045518	0
CLU	NA	65971851	27610475	A	chr8	-	1	1	0	TRUE	0	0	NA	NA	FALSE	FALSE	0.783738230661584	0.113975529922011	0.0182482769367714	0
CLU	17174949	65971731	27610600	B	chr8	-	1	2	1	TRUE	1	0	NA	1	TRUE	FALSE	0.783738230661584	0.113975529922011	0.0182482769367714	1
CLU	17176195	65973324	27609086	B	chr8	-	1	3	0	TRUE	0	0	NA	NA	FALSE	FALSE	0.783738230661584	0.113975529922011	0.0182482769367714	0
COX4I1	3658364	120673221	85805733	B	chr16	+	1	1	1	TRUE	0	0	NA	NA	FALSE	TRUE	0.944185697097406	0.0161030619846278	0.00863935871916557	0
COX4I1	3659008	120672892	85805104	A	chr16	+	1	2	0	TRUE	0	0	NA	NA	FALSE	FALSE	0.944185697097406	0.0161030619846278	0.00863935871916557	0
COX5B	36347467	36691689	97646189	A	chr2	+	1	1	0	TRUE	0	0	NA	NA	FALSE	FALSE	0.855714838347976	0.0992192392575766	0.042303606006202	0
COX5B	36348026	36692211	97647067	B	chr2	+	1	2	0	TRUE	0	1	1	NA	FALSE	FALSE	0.855714838347976	0.0992192392575766	0.042303606006202	1
COX5B	36348099	36692284	97647140	A	chr2	+	1	3	0	TRUE	0	0	NA	NA	FALSE	FALSE	0.855714838347976	0.0992192392575766	0.042303606006202	0
CTSC	71050284	88288693	88326399	B	chr11	-	1	2	0	TRUE	0	0	NA	NA	FALSE	TRUE	0.56863538080702	0.248072734802347	0.0870597867852222	0
CTSC	71050328	88288649	88326443	B	chr11	-	1	3	0	TRUE	0	0	NA	NA	FALSE	TRUE	0.56863538080702	0.248072734802347	0.0870597867852222	0
CTSC	71058525	88281531	88334937	A	chr11	-	1	1	1	TRUE	0	0	NA	NA	TRUE	TRUE	0.56863538080702	0.248072734802347	0.0870597867852222	0
CTSL	22037689	60801424	87727594	B	chr9	+	1	1	1	TRUE	0	0	NA	NA	TRUE	FALSE	0.736206696492675	0.151989998448525	0.094952292475015	0
DECR1	41813659	15931181	90018909	B	chr8	+	1	2	1	TRUE	0	0	NA	NA	FALSE	TRUE	0.522531328189535	0.277373526701703	0.118866870803695	0
DECR1	41839005	15924253	90036940	A	chr8	+	1	3	0	TRUE	0	0	NA	NA	FALSE	TRUE	0.522531328189535	0.277373526701703	0.118866870803695	0
DECR1	41843077	15922484	90042800	A	chr8	+	1	1	0	TRUE	0	0	NA	NA	FALSE	TRUE	0.522531328189535	0.277373526701703	0.118866870803695	0
DNAJC1	6528237	18392291	22003213	A	chr10	-	1	2	0	TRUE	0	0	NA	NA	FALSE	FALSE	0.854579671979066	0.0470654156330778	0.0419808141893029	0
DNAJC1	6592612	18317000	21929141	B	chr10	-	1	1	0	TRUE	0	0	NA	NA	FALSE	FALSE	0.854579671979066	0.0470654156330778	0.0419808141893029	0
DNAJC1	6600091	18308949	21920963	B	chr10	-	1	3	0	FALSE	0	0	NA	NA	FALSE	FALSE	0.854579671979066	0.0470654156330778	0.0419808141893029	0
EEF1B2	30323331	63178439	206161346	B	chr2	+	1	1	0	TRUE	1	0	NA	1	FALSE	TRUE	0.907274785866088	0.0733639628039317	0.00675783425951747	1
EEF1B2	30323951	63177876	206160710	A	chr2	+	1	2	0	TRUE	1	0	NA	2	FALSE	TRUE	0.907274785866088	0.0733639628039317	0.00675783425951747	1
EIF3M	30769664	105000241	32601822	A	chr11	+	1	2	0	TRUE	0	0	NA	NA	FALSE	FALSE	0.664099088028404	0.120521674770363	0.0842551269415574	0
EIF3M	30770648	105001270	32600832	A	chr11	+	1	3	0	TRUE	0	0	NA	NA	FALSE	TRUE	0.664099088028404	0.120521674770363	0.0842551269415574	0
EIF3M	30770791	105001413	32600689	B	chr11	+	1	1	0	TRUE	0	0	NA	NA	FALSE	TRUE	0.664099088028404	0.120521674770363	0.0842551269415574	0
FCN3	42912344	NA	27373965	A	chr1	-	1	1	1	TRUE	0	0	NA	NA	FALSE	FALSE	0.977913663997076	0.0162659201649503	0.00582041583797355	0
FYB1	40536566	6646636	39124278	B	chr5	-	1	3	1	TRUE	0	0	NA	NA	FALSE	TRUE	0.327558153129456	0.306210635818471	0.0946732811014853	0
FYB1	40539316	6643762	39127741	A	chr5	-	1	1	1	TRUE	0	0	NA	NA	FALSE	FALSE	0.327558153129456	0.306210635818471	0.0946732811014853	0
FYB1	40542305	6642556	39130612	B	chr5	-	1	2	0	TRUE	0	0	NA	NA	FALSE	FALSE	0.327558153129456	0.306210635818471	0.0946732811014853	0
GTF3A	77980893	146954077	27435034	A	chr13	+	1	3	0	TRUE	0	0	NA	NA	FALSE	TRUE	0.600752588398219	0.139015302532002	0.0965132511042985	0
GTF3A	77988854	146950533	27427092	B	chr13	+	1	1	0	TRUE	0	0	NA	NA	FALSE	TRUE	0.600752588398219	0.139015302532002	0.0965132511042985	0
GTF3A	77990181	146948975	27424938	A	chr13	+	1	2	0	TRUE	0	0	NA	NA	FALSE	FALSE	0.600752588398219	0.139015302532002	0.0965132511042985	0
HCST	NA	30418581	35903416	A	chr19	+	1	2	1	TRUE	0	0	NA	NA	FALSE	FALSE	0.880347791920241	0.0902225115272148	0.0264152182298497	0
HCST	25245897	30418641	35903351	B	chr19	+	1	1	0	TRUE	0	0	NA	NA	FALSE	FALSE	0.880347791920241	0.0902225115272148	0.0264152182298497	0
HNRNPA3	55861750	75665301	177219314	A	chr2	+	1	3	1	TRUE	0	0	NA	NA	FALSE	TRUE	0.52084346826704	0.183265816094471	0.141297031363774	0
HNRNPA3	55863977	75662925	177216940	A	chr2	+	1	2	1	TRUE	0	0	NA	NA	FALSE	FALSE	0.52084346826704	0.183265816094471	0.141297031363774	0
HNRNPA3	55864057	75662845	177216860	B	chr2	+	1	1	0	TRUE	0	0	NA	NA	FALSE	FALSE	0.52084346826704	0.183265816094471	0.141297031363774	0
HNRNPD	2340672	99976534	82371528	A	chr4	-	1	2	0	TRUE	0	0	NA	NA	FALSE	FALSE	0.567913268458689	0.186164897003584	0.116848623318473	0
HNRNPD	2351065	99966183	82358820	B	chr4	-	1	3	0	TRUE	0	0	NA	NA	FALSE	FALSE	0.567913268458689	0.186164897003584	0.116848623318473	0
HNRNPD	2354494	99962515	82355304	A	chr4	-	1	1	0	TRUE	0	0	NA	NA	FALSE	TRUE	0.567913268458689	0.186164897003584	0.116848623318473	0
HNRNPDL	2316973	100038720	82429248	A	chr4	-	1	2	0	TRUE	0	0	NA	NA	FALSE	FALSE	0.536222611745504	0.165869346026937	0.128944266434478	0
HNRNPDL	2320298	100036195	82426129	B	chr4	-	1	1	1	TRUE	1	0	NA	2	FALSE	TRUE	0.536222611745504	0.165869346026937	0.128944266434478	1
HNRNPDL	2321557	NA	82424883	B	chr4	-	1	3	1	TRUE	1	0	NA	1	FALSE	TRUE	0.536222611745504	0.165869346026937	0.128944266434478	1
HP1BP3	47154627	138225888	20773610	B	chr1	-	1	3	0	TRUE	0	0	NA	NA	TRUE	FALSE	0.584207502073337	0.147202935836228	0.108774934435547	0
HP1BP3	47163734	138222187	20779812	A	chr1	-	1	2	0	TRUE	0	0	NA	NA	FALSE	FALSE	0.584207502073337	0.147202935836228	0.108774934435547	0
HP1BP3	47164292	138221722	20780345	A	chr1	-	1	1	0	TRUE	0	0	NA	NA	FALSE	FALSE	0.584207502073337	0.147202935836228	0.108774934435547	0
ITM2B	65478677	73366320	48256383	A	chr13	+	1	3	0	TRUE	1	0	NA	1	FALSE	TRUE	0.659476474344719	0.209651261141675	0.0644256606178369	1
ITM2B	65480522	73368426	48253808	B	chr13	+	1	2	0	TRUE	0	0	NA	NA	TRUE	TRUE	0.659476474344719	0.209651261141675	0.0644256606178369	0
ITM2B	65554808	73385009	48233477	A	chr13	+	1	1	0	TRUE	0	0	NA	NA	FALSE	FALSE	0.659476474344719	0.209651261141675	0.0644256606178369	0
KRT8	NA	NA	52948828	B	chr12	-	1	1	0	FALSE	0	0	NA	NA	FALSE	FALSE	0.401641382115001	0.118877091355848	0.1065482624109	0
LMNA	120563358	88482099	156139080	B	chr1	+	1	3	1	TRUE	0	0	NA	NA	FALSE	TRUE	0.546723485993617	0.13140560271489	0.0899895528223464	0
LMNA	120564813	88483412	156137654	B	chr1	+	1	2	0	TRUE	0	0	NA	NA	FALSE	TRUE	0.546723485993617	0.13140560271489	0.0899895528223464	0
LMNA	120565459	88484046	156137028	A	chr1	+	1	1	0	TRUE	1	0	NA	3	FALSE	TRUE	0.546723485993617	0.13140560271489	0.0899895528223464	1
LMO7	35870418	101896467	75817161	B	chr13	+	1	1	1	TRUE	1	0	NA	1	FALSE	FALSE	0.533321349950649	0.19065833533814	0.0763247015669237	1
LMO7	35878184	101888677	75809154	B	chr13	+	1	3	1	TRUE	0	0	NA	NA	FALSE	FALSE	0.533321349950649	0.19065833533814	0.0763247015669237	0
LMO7	35882424	101884414	75804541	A	chr13	+	1	2	1	TRUE	0	0	NA	NA	FALSE	FALSE	0.533321349950649	0.19065833533814	0.0763247015669237	0
LRRFIP2	33241086	111161388	37129063	A	chr3	-	1	3	1	TRUE	1	0	NA	2	FALSE	FALSE	0.40941084392043	0.240479376758737	0.120895224966615	1
LRRFIP2	33271731	111190283	37094792	A	chr3	-	1	2	1	TRUE	0	0	NA	NA	FALSE	FALSE	0.40941084392043	0.240479376758737	0.120895224966615	0
LRRFIP2	33283820	111199664	37083806	B	chr3	-	1	1	1	TRUE	1	0	NA	3	FALSE	FALSE	0.40941084392043	0.240479376758737	0.120895224966615	1
LTBP1	130245906	75352687	33347367	B	chr2	+	1	2	1	TRUE	0	0	NA	NA	FALSE	FALSE	0.683873666291501	0.163993173072436	0.0771166397134316	0
LTBP1	130249502	75348744	33342838	B	chr2	+	1	1	0	TRUE	0	0	NA	NA	FALSE	FALSE	0.683873666291501	0.163993173072436	0.0771166397134316	0
MT1A	NA	94179338	56638766	A	chr16	+	1	1	0	TRUE	0	0	NA	NA	FALSE	FALSE	0.75783445696895	0.155466154416986	0.0866993886140638	0
MT1A	53036909	5643156	56639859	B	chr16	+	1	2	0	TRUE	0	0	NA	NA	FALSE	FALSE	0.75783445696895	0.155466154416986	0.0866993886140638	0
MYL6	80949087	128491032	56161387	B	chr12	+	1	2	1	TRUE	1	1	2	1	FALSE	TRUE	0.55257285168719	0.289098045413269	0.0731410848081067	1
MYL6	80950152	128492058	56160320	A	chr12	+	1	1	1	TRUE	1	1	1	2	FALSE	FALSE	0.55257285168719	0.289098045413269	0.0731410848081067	1
NCL	8724461	86359206	231464336	A	chr2	-	1	2	0	TRUE	0	0	NA	NA	TRUE	FALSE	0.571113934718456	0.279402889891077	0.0785641527913723	0
NCL	8725530	86358223	231463316	B	chr2	-	1	1	0	TRUE	0	0	NA	NA	TRUE	FALSE	0.571113934718456	0.279402889891077	0.0785641527913723	0
NCL	8731059	86353126	231457643	A	chr2	-	1	3	0	TRUE	0	0	NA	NA	FALSE	TRUE	0.571113934718456	0.279402889891077	0.0785641527913723	0
NUDT22	7638060	6993525	64229478	B	chr11	+	1	1	1	TRUE	0	0	NA	NA	FALSE	FALSE	0.505889629716707	0.308289019835995	0.123189525595128	0
NUDT22	7638282	6993758	64229247	B	chr11	+	1	2	1	TRUE	0	0	NA	NA	FALSE	FALSE	0.505889629716707	0.308289019835995	0.123189525595128	0
NUDT22	7638771	6994670	64227666	A	chr11	+	1	3	1	TRUE	0	0	NA	NA	FALSE	FALSE	0.505889629716707	0.308289019835995	0.123189525595128	0
OCIAD2	9879332	73335820	48904484	A	chr4	-	1	2	1	TRUE	0	0	NA	NA	FALSE	FALSE	0.448232453312896	0.306648343385526	0.10166349581908	0
OCIAD2	9886656	73329320	48897857	B	chr4	-	1	1	1	TRUE	0	0	NA	NA	FALSE	FALSE	0.448232453312896	0.306648343385526	0.10166349581908	0
OCIAD2	9888972	73327663	48894006	A	chr4	-	1	3	1	TRUE	0	0	NA	NA	FALSE	TRUE	0.448232453312896	0.306648343385526	0.10166349581908	0
OSBPL8	42963054	111165195	76559397	A	chr12	-	1	2	1	TRUE	0	0	NA	NA	TRUE	FALSE	0.477346786755756	0.192691920254376	0.122636556807029	0
OSBPL8	43034884	111233552	76450988	B	chr12	-	1	3	1	TRUE	1	0	NA	1	TRUE	FALSE	0.477346786755756	0.192691920254376	0.122636556807029	1
OSBPL8	43067378	111255687	76410634	B	chr12	-	1	1	1	TRUE	0	0	NA	NA	FALSE	FALSE	0.477346786755756	0.192691920254376	0.122636556807029	0
PABPC1	51606479	36596099	100703359	B	chr8	-	1	1	1	TRUE	0	0	NA	NA	FALSE	TRUE	0.604764130471593	0.145808564328575	0.107768365302307	0
PABPC1	51607118	36596563	100704297	A	chr8	-	1	2	0	TRUE	0	0	NA	NA	FALSE	TRUE	0.604764130471593	0.145808564328575	0.107768365302307	0
PABPC1	51608981	36597457	100705589	A	chr8	-	1	3	0	TRUE	0	0	NA	NA	FALSE	TRUE	0.604764130471593	0.145808564328575	0.107768365302307	0
PAK2	87510765	32043176	196805352	B	chr3	+	1	2	0	TRUE	0	0	NA	NA	FALSE	FALSE	0.566610923659626	0.165274259744012	0.137378562879749	0
PAK2	87513550	32044480	196802027	A	chr3	+	1	3	0	TRUE	0	0	NA	NA	FALSE	FALSE	0.566610923659626	0.165274259744012	0.137378562879749	0
PAK2	87530160	32052382	196782626	B	chr3	+	1	1	1	TRUE	0	0	NA	NA	TRUE	FALSE	0.566610923659626	0.165274259744012	0.137378562879749	0
PLIN2	45270591	86657114	19116359	A	chr9	-	1	1	0	TRUE	0	0	NA	NA	FALSE	FALSE	0.587377627860847	0.223441387454808	0.118221760472063	0
PLIN2	45279595	86648579	19108747	B	chr9	-	1	2	0	TRUE	0	0	NA	NA	FALSE	FALSE	0.587377627860847	0.223441387454808	0.118221760472063	0
PNRC1	NA	NA	89082546	B	chr6	+	1	2	0	TRUE	0	0	NA	NA	TRUE	FALSE	0.482927691069732	0.113140781778436	0.106406390670693	0
PNRC1	NA	NA	89082735	A	chr6	+	1	1	0	TRUE	0	0	NA	NA	TRUE	FALSE	0.482927691069732	0.113140781778436	0.106406390670693	0
PNRC1	22055794	33246506	89083753	B	chr6	+	1	3	1	TRUE	0	0	NA	NA	TRUE	FALSE	0.482927691069732	0.113140781778436	0.106406390670693	0
POLR2I	25114186	30232749	36114412	B	chr19	-	1	2	0	TRUE	0	0	NA	NA	FALSE	FALSE	0.755369066587009	0.172742150007991	0.0540833374259111	0
POLR2I	25114535	30233066	36114066	B	chr19	-	1	3	0	TRUE	0	0	NA	NA	FALSE	TRUE	0.755369066587009	0.172742150007991	0.0540833374259111	0
POLR2I	25114586	30233117	36114015	A	chr19	-	1	1	0	TRUE	0	0	NA	NA	FALSE	TRUE	0.755369066587009	0.172742150007991	0.0540833374259111	0
PPP1R12A	40205060	108268706	79788648	A	chr12	-	1	2	1	TRUE	0	0	NA	NA	FALSE	TRUE	0.446926320959454	0.182587882846652	0.128727876937122	0
PPP1R12A	40206994	108269253	79786478	B	chr12	-	1	1	0	TRUE	0	0	NA	NA	FALSE	TRUE	0.446926320959454	0.182587882846652	0.128727876937122	0
PQBP1	137866599	7895992	48902042	A	chrX	+	1	1	1	TRUE	0	0	NA	NA	FALSE	FALSE	0.563558196233196	0.297861832094986	0.0654210943815207	0
PQBP1	137867272	7895227	48902732	B	chrX	+	1	2	1	TRUE	0	0	NA	NA	FALSE	FALSE	0.563558196233196	0.297861832094986	0.0654210943815207	0
PRDX5	7558935	6907241	64320903	A	chr11	+	1	3	0	TRUE	0	0	NA	NA	FALSE	FALSE	0.654990039051298	0.217296769942059	0.0724705343233892	0
PRDX5	7558973	6907279	64320865	B	chr11	+	1	1	1	TRUE	1	0	NA	2	FALSE	FALSE	0.654990039051298	0.217296769942059	0.0724705343233892	1
PRDX5	7559641	6907981	64319868	A	chr11	+	1	2	1	TRUE	1	0	NA	1	FALSE	FALSE	0.654990039051298	0.217296769942059	0.0724705343233892	1
PRMT1	19642595	44976982	49688162	B	chr19	+	1	1	0	TRUE	0	0	NA	NA	FALSE	FALSE	0.926783360787111	0.0576141033516816	0.0156025358612071	0
PSAP	3162802	60301693	71817476	B	chr10	-	1	1	0	TRUE	0	0	NA	NA	FALSE	FALSE	0.529463121597523	0.120122791449763	0.0917676963515657	0
PSAP	3163939	60300880	71818617	A	chr10	-	1	2	0	TRUE	0	0	NA	NA	FALSE	FALSE	0.529463121597523	0.120122791449763	0.0917676963515657	0
PTGES3	80415427	128059285	56687998	A	chr12	-	1	1	1	TRUE	0	0	NA	NA	TRUE	FALSE	0.779179876612992	0.141431447379046	0.0369966196325966	0
PTGES3	80452845	128068671	56673065	B	chr12	-	1	2	1	TRUE	0	0	NA	NA	FALSE	FALSE	0.779179876612992	0.141431447379046	0.0369966196325966	0
RBM39	16622125	156179177	35740824	A	chr20	-	1	2	1	TRUE	1	0	NA	2	FALSE	FALSE	0.348160916111675	0.240546965912709	0.0850546175640708	1
RBM39	16623894	156177385	35739017	B	chr20	-	1	1	1	TRUE	1	0	NA	1	FALSE	TRUE	0.348160916111675	0.240546965912709	0.0850546175640708	1
REXO2	95723830	48475119	114443933	A	chr11	+	1	2	0	TRUE	0	0	NA	NA	FALSE	FALSE	0.654016185218113	0.114629538987516	0.0820275655039337	0
REXO2	95725967	48473031	114446087	A	chr11	+	1	3	0	TRUE	0	0	NA	NA	FALSE	TRUE	0.654016185218113	0.114629538987516	0.0820275655039337	0
REXO2	95727358	48471872	114447826	B	chr11	+	1	1	0	TRUE	0	0	NA	NA	FALSE	TRUE	0.654016185218113	0.114629538987516	0.0820275655039337	0
RNF181	30027554	72361411	85596649	A	chr2	+	1	1	1	TRUE	0	0	NA	NA	FALSE	FALSE	0.491269753508218	0.310929536061541	0.111373049389626	0
RNF181	30027772	72361190	85596857	B	chr2	+	1	2	0	FALSE	0	0	NA	NA	FALSE	FALSE	0.491269753508218	0.310929536061541	0.111373049389626	0
RPL27A	51361293	109519918	8684006	B	chr11	+	1	1	0	TRUE	0	0	NA	NA	TRUE	TRUE	0.797448357236074	0.0712482509002535	0.0393103134758564	0
RPL27A	51361729	109519648	8683265	A	chr11	+	1	2	0	TRUE	0	0	NA	NA	TRUE	FALSE	0.797448357236074	0.0712482509002535	0.0393103134758564	0
RPL29	7062793	106431344	51993850	B	chr3	-	1	3	0	FALSE	0	0	NA	NA	FALSE	TRUE	0.257767326508407	0.186205284629926	0.12051695971123	0
RPL29	7062836	106431295	51993893	A	chr3	-	1	2	0	FALSE	0	0	NA	NA	FALSE	TRUE	0.257767326508407	0.186205284629926	0.12051695971123	0
RPL29	7062983	106431154	51994040	A	chr3	-	1	1	0	FALSE	0	0	NA	NA	FALSE	TRUE	0.257767326508407	0.186205284629926	0.12051695971123	0
RPL32	94	115807167	12839530	B	chr3	-	1	1	0	TRUE	0	0	NA	NA	FALSE	FALSE	0.864888245394284	0.057531094147483	0.0356885967201964	0
RPL32	15918889	115807802	12840142	A	chr3	-	1	2	0	TRUE	0	0	NA	NA	FALSE	FALSE	0.864888245394284	0.057531094147483	0.0356885967201964	0
RPLP0	9474022	115561244	120198854	A	chr12	-	1	1	0	TRUE	0	0	NA	NA	FALSE	TRUE	0.561334013530232	0.154768710788266	0.105983258580364	0
RPP30	42393886	36100288	90894891	A	chr10	+	1	2	0	TRUE	0	0	NA	NA	FALSE	FALSE	0.838717790559951	0.0638798794655133	0.0466932237082184	0
RPP30	42394905	36101234	90895880	B	chr10	+	1	1	0	TRUE	0	0	NA	NA	FALSE	FALSE	0.838717790559951	0.0638798794655133	0.0466932237082184	0
RPS19	14191091	24885452	41861112	B	chr19	+	1	2	0	TRUE	0	0	NA	NA	TRUE	FALSE	0.669222201060535	0.0935453106480218	0.0595857001362633	0
RPS19	14191313	24885206	41860845	A	chr19	+	1	1	0	TRUE	0	1	3	NA	TRUE	FALSE	0.669222201060535	0.0935453106480218	0.0595857001362633	1
RPS19	14191383	24885136	41860775	B	chr19	+	1	3	1	TRUE	0	1	2	NA	FALSE	FALSE	0.669222201060535	0.0935453106480218	0.0595857001362633	1
RPS24	6267048	24495775	78040615	B	chr10	+	1	2	1	TRUE	0	0	NA	NA	FALSE	TRUE	0.455971266809013	0.263184628241409	0.19487012688523	0
RPS24	6272258	24491907	78035511	B	chr10	+	1	1	0	TRUE	1	0	NA	3	FALSE	FALSE	0.455971266809013	0.263184628241409	0.19487012688523	1
RPS27A	3176295	29547744	55232808	B	chr2	+	1	3	1	TRUE	0	0	NA	NA	TRUE	FALSE	0.671803075149666	0.114554515595105	0.0450151049046532	0
RPS27A	3176858	29547205	55233417	A	chr2	+	1	1	0	TRUE	1	0	NA	3	FALSE	FALSE	0.671803075149666	0.114554515595105	0.0450151049046532	1
RPS27A	3177723	29546421	55234831	B	chr2	+	1	2	0	TRUE	0	0	NA	NA	FALSE	FALSE	0.671803075149666	0.114554515595105	0.0450151049046532	0
S100A9	123045595	90692733	153360923	B	chr1	+	1	1	0	FALSE	1	0	NA	2	FALSE	TRUE	0.558187226709696	0.106673795362866	0.0473543455190502	1
SAA1	42788941	46753971	18269717	B	chr11	+	1	1	0	TRUE	0	0	NA	NA	FALSE	TRUE	1	5.09661299991327e-32	6.95999774152834e-62	0
SAA2	42801952	46741256	18245910	A	chr11	-	1	1	1	TRUE	0	0	NA	NA	FALSE	FALSE	1	4.1605275842795e-32	3.62663384829328e-34	0
SEC61G	NA	16506472	54757594	B	chr7	-	1	2	1	TRUE	0	0	NA	NA	TRUE	FALSE	0.792248773204157	0.139849848397375	0.0522399006324699	0
SEC61G	106612098	16501807	54752420	B	chr7	-	1	3	0	TRUE	0	0	NA	NA	FALSE	FALSE	0.792248773204157	0.139849848397375	0.0522399006324699	0
SEC61G	106618119	16508100	54759158	A	chr7	-	1	1	0	TRUE	0	0	NA	NA	TRUE	FALSE	0.792248773204157	0.139849848397375	0.0522399006324699	0
SEPTIN7	88957928	25288318	35873775	A	chr7	+	1	2	0	TRUE	0	0	NA	NA	FALSE	TRUE	0.661485292708874	0.101590508023623	0.0742993189760155	0
SEPTIN7	88963658	25293685	35879823	B	chr7	+	1	3	0	TRUE	0	0	NA	NA	FALSE	TRUE	0.661485292708874	0.101590508023623	0.0742993189760155	0
SEPTIN7	88974138	25301412	35890668	B	chr7	+	1	1	0	TRUE	0	0	NA	NA	FALSE	TRUE	0.661485292708874	0.101590508023623	0.0742993189760155	0
SIVA1	15974795	112647032	104755824	A	chr14	+	1	2	0	TRUE	0	0	NA	NA	FALSE	FALSE	0.765247238274098	0.20779736240937	0.0174534953258776	0
SIVA1	15975572	112647825	104756604	B	chr14	+	1	1	1	TRUE	0	0	NA	NA	FALSE	FALSE	0.765247238274098	0.20779736240937	0.0174534953258776	0
SKP1	NA	52232117	134176855	A	chr5	-	1	1	0	TRUE	0	0	NA	NA	TRUE	FALSE	0.626256147529923	0.191447901061771	0.0610229522423676	0
SKP1	27680905	52236932	134173926	A	chr5	-	1	2	0	TRUE	0	0	NA	NA	FALSE	FALSE	0.626256147529923	0.191447901061771	0.0610229522423676	0
SKP1	27681001	52236836	134174022	B	chr5	-	1	3	0	TRUE	0	0	NA	NA	FALSE	FALSE	0.626256147529923	0.191447901061771	0.0610229522423676	0
SLIRP	24395555	87444026	77708208	A	chr14	+	1	2	1	TRUE	0	0	NA	NA	FALSE	FALSE	0.90986490491153	0.0751718893752567	0.0133647655956928	0
SLIRP	24396963	87447564	77710838	B	chr14	+	1	1	1	TRUE	0	0	NA	NA	FALSE	TRUE	0.90986490491153	0.0751718893752567	0.0133647655956928	0
SLIRP	24400048	87449400	77715879	A	chr14	+	1	3	1	TRUE	0	0	NA	NA	FALSE	TRUE	0.90986490491153	0.0751718893752567	0.0133647655956928	0
SMIM22	NA	5007375	4795449	A	chr16	+	1	1	0	TRUE	0	0	NA	NA	TRUE	FALSE	0.80386625851054	0.176404661944634	0.0144157808728062	0
SMIM22	4553970	5007888	4795858	A	chr16	+	1	2	0	TRUE	0	0	NA	NA	FALSE	FALSE	0.80386625851054	0.176404661944634	0.0144157808728062	0
SMIM22	4554251	5008206	4796190	B	chr16	+	1	3	1	TRUE	0	0	NA	NA	FALSE	FALSE	0.80386625851054	0.176404661944634	0.0144157808728062	0
SP100	NA	NA	230494416	B	chr2	+	1	1	0	TRUE	0	0	NA	NA	FALSE	FALSE	0.338849336164301	0.171881512969729	0.112763913664106	0
SP100	9827210	NA	230474447	A	chr2	+	1	3	0	TRUE	0	0	NA	NA	FALSE	FALSE	0.338849336164301	0.171881512969729	0.112763913664106	0
SP100	9831537	85682217	230470015	B	chr2	+	1	2	0	TRUE	0	0	NA	NA	FALSE	FALSE	0.338849336164301	0.171881512969729	0.112763913664106	0
SPCS3	85550605	54523394	176328198	B	chr4	+	1	3	0	TRUE	0	0	NA	NA	FALSE	FALSE	0.917677975506609	0.0764212911443981	0.00471223794973352	0
SPCS3	85551667	54525055	176327162	B	chr4	+	1	2	0	TRUE	0	0	NA	NA	FALSE	FALSE	0.917677975506609	0.0764212911443981	0.00471223794973352	0
SPCS3	85558260	54529762	176320219	A	chr4	+	1	1	0	TRUE	1	0	NA	1	FALSE	FALSE	0.917677975506609	0.0764212911443981	0.00471223794973352	1
SRSF3	9069481	29040775	36601152	B	chr6	+	1	1	1	TRUE	0	0	NA	NA	FALSE	TRUE	0.764760599791859	0.158456021874114	0.049538448790402	0
SRSF3	9071641	29038624	36598983	A	chr6	+	1	2	1	TRUE	0	0	NA	NA	FALSE	TRUE	0.764760599791859	0.158456021874114	0.049538448790402	0
SRSF3	9073190	29036241	36596761	B	chr6	+	1	3	0	TRUE	0	0	NA	NA	TRUE	FALSE	0.764760599791859	0.158456021874114	0.049538448790402	0
STXBP2	6473415	3641206	7646344	A	chr19	+	1	2	0	TRUE	0	0	NA	NA	FALSE	TRUE	0.743849465886379	0.232895282676344	0.0134689671314969	0
STXBP2	6473990	3641735	7647162	B	chr19	+	1	1	0	TRUE	0	0	NA	NA	FALSE	TRUE	0.743849465886379	0.232895282676344	0.0134689671314969	0
SUB1	35396455	11995950	32585625	A	chr5	+	1	1	0	FALSE	0	0	NA	NA	TRUE	FALSE	0.640786085193608	0.24373342961639	0.0974745102090351	0
SUB1	35398945	11993860	32588512	B	chr5	+	1	3	1	TRUE	0	0	NA	NA	TRUE	FALSE	0.640786085193608	0.24373342961639	0.0974745102090351	0
SUB1	35408945	11986563	32598961	B	chr5	+	1	2	0	TRUE	0	0	NA	NA	FALSE	TRUE	0.640786085193608	0.24373342961639	0.0974745102090351	0
SVIL	10663927	5037107	29569312	B	chr10	-	1	3	1	TRUE	0	0	NA	NA	TRUE	FALSE	0.566138539962713	0.17103592031775	0.107923391138556	0
SVIL	10663984	5037164	29569255	A	chr10	-	1	2	0	TRUE	0	0	NA	NA	TRUE	FALSE	0.566138539962713	0.17103592031775	0.107923391138556	0
SVIL	10669265	5040238	29563201	A	chr10	-	1	1	0	TRUE	0	0	NA	NA	TRUE	FALSE	0.566138539962713	0.17103592031775	0.107923391138556	0
TAX1BP1	81741302	52727301	27758133	A	chr7	+	1	1	1	TRUE	0	0	NA	NA	TRUE	FALSE	0.595180706900673	0.0897161639438722	0.0831197938878631	0
TAX1BP1	81748006	52729468	27766021	A	chr7	+	1	3	0	TRUE	0	0	NA	NA	FALSE	FALSE	0.595180706900673	0.0897161639438722	0.0831197938878631	0
TAX1BP1	81762659	52736850	27785163	B	chr7	+	1	2	0	TRUE	0	0	NA	NA	FALSE	TRUE	0.595180706900673	0.0897161639438722	0.0831197938878631	0
TFF3	NA	31129492	42315293	A	chr21	-	1	1	0	TRUE	0	0	NA	NA	FALSE	FALSE	0.973915732739476	0.0213173656009362	0.00448315160056012	0
TFF3	43033248	31127511	42313631	B	chr21	-	1	2	0	FALSE	1	0	NA	2	FALSE	FALSE	0.973915732739476	0.0213173656009362	0.00448315160056012	1
TMSB4X	99932134	167207337	12976968	A	chrX	+	1	1	0	FALSE	0	0	NA	NA	FALSE	TRUE	0.455550151399614	0.305819174067932	0.0821874537676783	0
TOP1	11942904	160702702	41097220	B	chr20	+	1	1	0	TRUE	0	0	NA	NA	FALSE	FALSE	0.596237414131729	0.178854815337958	0.139672339799107	0
TOP1	11946514	160698239	41092587	A	chr20	+	1	2	0	TRUE	0	0	NA	NA	FALSE	FALSE	0.596237414131729	0.178854815337958	0.139672339799107	0
TOP1	11976200	160670202	41061490	A	chr20	+	1	3	0	TRUE	0	0	NA	NA	FALSE	FALSE	0.596237414131729	0.178854815337958	0.139672339799107	0
TPM1	102206374	67031513	63062215	B	chr15	+	1	3	1	TRUE	0	1	3	NA	FALSE	TRUE	0.430322645245498	0.22403923440655	0.104081368798905	1
TPM1	102223500	67048123	63043831	A	chr15	+	1	2	1	TRUE	1	0	NA	3	FALSE	TRUE	0.430322645245498	0.22403923440655	0.104081368798905	1
TPM1	102224403	67049018	63042943	A	chr15	+	1	1	1	TRUE	1	0	NA	1	FALSE	FALSE	0.430322645245498	0.22403923440655	0.104081368798905	1
TPM2	68666340	43518299	35684315	B	chr9	-	1	2	0	TRUE	0	0	NA	NA	FALSE	FALSE	0.714307485328092	0.0808836358811639	0.0620543891064329	0
TPM2	68666568	43518464	35684550	B	chr9	-	1	3	1	TRUE	0	0	NA	NA	FALSE	FALSE	0.714307485328092	0.0808836358811639	0.0620543891064329	0
TPM2	68667290	43519227	35685269	A	chr9	-	1	1	1	TRUE	0	0	NA	NA	FALSE	FALSE	0.714307485328092	0.0808836358811639	0.0620543891064329	0
UQCRB	47618345	9776036	96231940	B	chr8	-	1	2	0	TRUE	0	0	NA	NA	TRUE	TRUE	0.852061194337498	0.13020637103505	0.0153635934026129	0
UQCRB	47619486	9774431	96233227	B	chr8	-	1	3	1	TRUE	0	0	NA	NA	FALSE	TRUE	0.852061194337498	0.13020637103505	0.0153635934026129	0
UQCRB	47621778	66905293	96235512	A	chr8	-	1	1	1	TRUE	0	0	NA	NA	FALSE	FALSE	0.852061194337498	0.13020637103505	0.0153635934026129	0
YBEY	46867452	76468156	46287123	A	chr21	+	1	1	1	TRUE	0	0	NA	NA	FALSE	FALSE	0.581048221098794	0.190194346568132	0.101027801533302	0
YBEY	46872340	76464324	46296162	B	chr21	+	1	2	1	TRUE	0	0	NA	NA	FALSE	FALSE	0.581048221098794	0.190194346568132	0.101027801533302	0
YBX1	28993244	119279198	42700781	B	chr1	+	1	3	0	TRUE	0	0	NA	NA	FALSE	FALSE	0.735397366466278	0.078494560487695	0.0659385553231049	0
YBX1	29002148	119285108	42693523	A	chr1	+	1	2	0	FALSE	0	0	NA	NA	FALSE	FALSE	0.735397366466278	0.078494560487695	0.0659385553231049	0
YBX1	29002181	119285141	42693490	B	chr1	+	1	1	1	TRUE	0	0	NA	NA	FALSE	FALSE	0.735397366466278	0.078494560487695	0.0659385553231049	0
ATP5F1C	24693696	10059655	7802270	B	chr10	+	2	1	0	TRUE	0	0	NA	NA	FALSE	FALSE	0.470709393210984	0.353868514875281	0.109228580248976	0
BAZ1A	49497691	54923040	34785777	A	chr14	-	2	1	0	TRUE	0	0	NA	NA	FALSE	FALSE	0.550863779805521	0.145398968277748	0.1021746971223	0
CCT4	8923327	22990879	61888381	A	chr2	-	2	1	0	TRUE	0	0	NA	NA	FALSE	FALSE	0.528719914633482	0.190819477445831	0.145842885717875	0
GTF3A	77984612	146951187	27429870	B	chr13	+	2	1	0	TRUE	0	0	NA	NA	FALSE	TRUE	0.600752588398219	0.139015302532002	0.0965132511042985	0
HNRNPD	2354397	99962612	82355401	B	chr4	-	2	1	1	TRUE	0	0	NA	NA	FALSE	TRUE	0.567913268458689	0.186164897003584	0.116848623318473	0
KRT8	58073731	101996782	52897273	B	chr12	-	2	1	0	FALSE	0	0	NA	NA	FALSE	TRUE	0.401641382115001	0.118877091355848	0.1065482624109	0
LMNA	120563942	88482611	156138488	B	chr1	+	2	1	1	TRUE	0	0	NA	NA	FALSE	TRUE	0.546723485993617	0.13140560271489	0.0899895528223464	0
LMO7	35886132	101881001	75800882	A	chr13	+	2	1	0	TRUE	0	0	NA	NA	TRUE	FALSE	0.533321349950649	0.19065833533814	0.0763247015669237	0
LTBP1	130277859	75327322	33315269	A	chr2	+	2	1	1	TRUE	0	0	NA	NA	FALSE	FALSE	0.683873666291501	0.163993173072436	0.0771166397134316	0
MYL6	80950493	128492401	56159975	B	chr12	+	2	1	0	TRUE	0	1	3	NA	FALSE	FALSE	0.55257285168719	0.289098045413269	0.0731410848081067	1
OSBPL8	43006646	111204839	76487510	A	chr12	-	2	1	1	TRUE	0	0	NA	NA	TRUE	FALSE	0.477346786755756	0.192691920254376	0.122636556807029	0
PABPC1	51632507	36605557	100717888	B	chr8	-	2	1	0	TRUE	0	0	NA	NA	FALSE	TRUE	0.604764130471593	0.145808564328575	0.107768365302307	0
PLIN2	45269383	86658581	19118321	A	chr9	-	2	1	0	TRUE	0	0	NA	NA	FALSE	FALSE	0.587377627860847	0.223441387454808	0.118221760472063	0
PPP1R12A	40188619	108259755	79798584	B	chr12	-	2	1	0	TRUE	1	0	NA	1	FALSE	FALSE	0.446926320959454	0.182587882846652	0.128727876937122	1
PQBP1	137867050	7895603	48902517	A	chrX	+	2	1	1	TRUE	0	0	NA	NA	FALSE	FALSE	0.563558196233196	0.297861832094986	0.0654210943815207	0
PSAP	3162140	NA	71816740	B	chr10	-	2	1	0	FALSE	0	0	NA	NA	FALSE	TRUE	0.529463121597523	0.120122791449763	0.0917676963515657	0
RBM39	16634589	156164923	35725155	B	chr20	-	2	1	0	TRUE	0	0	NA	NA	FALSE	TRUE	0.348160916111675	0.240546965912709	0.0850546175640708	0
REXO2	95725859	48473139	114445979	B	chr11	+	2	1	0	TRUE	0	0	NA	NA	FALSE	FALSE	0.654016185218113	0.114629538987516	0.0820275655039337	0
RPL29	7062787	106431350	51993844	B	chr3	-	2	1	0	FALSE	0	0	NA	NA	FALSE	TRUE	0.257767326508407	0.186205284629926	0.12051695971123	0
RPLP0	9474288	115561003	120199118	A	chr12	-	2	1	0	TRUE	0	0	NA	NA	FALSE	TRUE	0.561334013530232	0.154768710788266	0.105983258580364	0
RPS24	6267904	24495430	78040204	B	chr10	+	2	1	1	TRUE	0	1	1	NA	FALSE	TRUE	0.455971266809013	0.263184628241409	0.19487012688523	1
S100A9	123045797	90692808	153360769	A	chr1	+	2	1	0	FALSE	0	0	NA	NA	FALSE	FALSE	0.558187226709696	0.106673795362866	0.0473543455190502	0
SEPTIN7	88947312	25277544	35863552	B	chr7	+	2	1	1	TRUE	0	0	NA	NA	FALSE	TRUE	0.661485292708874	0.101590508023623	0.0742993189760155	0
TAX1BP1	81800064	52765021	27827738	B	chr7	+	2	1	1	TRUE	0	0	NA	NA	FALSE	TRUE	0.595180706900673	0.0897161639438722	0.0831197938878631	0
TMSB4X	99932112	167207364	12976947	A	chrX	+	2	1	0	FALSE	0	0	NA	NA	FALSE	TRUE	0.455550151399614	0.305819174067932	0.0821874537676783	0
TOP1	11954884	160693802	41084568	A	chr20	+	2	1	0	TRUE	0	0	NA	NA	FALSE	FALSE	0.596237414131729	0.178854815337958	0.139672339799107	0
TPM1	102211636	67036127	63056985	B	chr15	+	2	1	1	TRUE	1	0	NA	2	TRUE	TRUE	0.430322645245498	0.22403923440655	0.104081368798905	1
YBEY	NA	NA	46313004	B	chr21	+	2	1	1	TRUE	0	0	NA	NA	FALSE	FALSE	0.581048221098794	0.190194346568132	0.101027801533302	0
