# Supplementary material for: RNA splicing programs define tissue compartments and cell types at single-cell resolution
Source: eLife journal article supplement (doi:10.7554/elife.70692), 2021-09-13
Supplement: supp [file elife-70692-supp-v1.zip › elife_poa_e70692_Supplementary_file_5.txt]

human_gene_name	human_pearson	human_spearman	human_cell_num	human_p_val_corrected	human_sig	mouse_gene_name	mouse_pearson	mouse_spearman	mouse_cell_num	mouse_p_val_corrected	mouse_sig	lemur_gene_name	lemur_pearson	lemur_spearman	lemur_cell_num	lemur_p_val_corrected	lemur_sig
SUCLA2	0.658711939663928	0.710329146882432	137	1.45799193284847e-19	1	Sucla2	0.0196802188881553	-0.010704134363689	1376	NA	0	NA	NA	NA	NA	NA	NA
ADK	-0.713405206831764	-0.673835626653305	192	5.38018533748092e-24	1	NA	NA	NA	NA	NA	NA	NA	NA	NA	NA	NA	NA
MALAT1	0.646994732846814	0.637319268136157	187	6.22704179483591e-20	1	NA	NA	NA	NA	NA	NA	NA	NA	NA	NA	NA	NA
ATP5F1B	-0.0261545534256564	-0.585853490927811	932	3.30136891137532e-84	1	Atp5b	0.191619553036713	0.270642453137866	1788	1.83011018536678e-28	1	NA	NA	NA	NA	NA	NA
LOC105369513	0.495892253488403	0.542969387352514	128	2.1001994023346e-08	1	NA	NA	NA	NA	NA	NA	NA	NA	NA	NA	NA	NA
SSBP1	0.0159642789821444	0.487526806934327	882	4.47386967931187e-51	1	NA	NA	NA	NA	NA	NA	NA	NA	NA	NA	NA	NA
FAM71E1	-0.454592172090124	-0.472536258329619	1881	1.81342228533091e-102	1	Fam71e1	-0.225030451998363	-0.257142857142857	6	NA	0	FAM71E1	-0.0488662882378307	-0.0988194159204901	2787	NA	0
CWC27	0.37555072708089	0.460890641678079	196	6.27256353361792e-09	1	NA	NA	NA	NA	NA	NA	CWC27	-1	-1	2	NA	0
SNRPB	-0.356211900162286	-0.455706919139578	123	6.96791188093812e-05	1	NA	NA	NA	NA	NA	NA	SNRPB	-0.0475873224959315	-0.0441069226543682	82	NA	0
TPPP2	-0.422327755300268	-0.441462427048836	1434	1.0997762972836e-66	1	NA	NA	NA	NA	NA	NA	TPPP2	0.0361512266540742	0.0286810037511139	2704	NA	0
LINC01688	0.0139980178821725	0.430974984296323	130	0.000181614848639191	1	NA	NA	NA	NA	NA	NA	NA	NA	NA	NA	NA	NA
NDUFC2	0.0557746065339823	-0.425804356265766	1238	6.36752014182218e-53	1	NA	NA	NA	NA	NA	NA	NA	NA	NA	NA	NA	NA
DRG1	-0.0467905184273146	0.421675470566667	1075	8.18628723002481e-45	1	NA	NA	NA	NA	NA	NA	DRG1	0.0216460119803399	0.0167669385005062	312	NA	0
THYN1	-0.44900465225347	-0.42055190598889	188	1.10238618021921e-06	1	Thyn1	0.120878974700361	0.218006701901824	476	0.00131828742513737	1	THYN1	-0.221934502917595	-0.297286402132634	9	NA	0
C5orf46	-0.385700669176621	-0.417902846828513	127	0.000599264275373095	1	NA	NA	NA	NA	NA	NA	NA	NA	NA	NA	NA	NA
MAP3K14-AS1	0.357443983755118	0.406950356758779	195	2.09660224315932e-06	1	Efcab15	0.190437373817359	0.192620282738229	773	5.66747301223361e-05	1	NA	NA	NA	NA	NA	NA
LOC101929154	-0.0638843608367998	-0.401739154427093	197	2.87984075711885e-06	1	NA	NA	NA	NA	NA	NA	NA	NA	NA	NA	NA	NA
RPN2	-0.396742143417916	-0.39936972891238	679	1.28629329047258e-24	1	Rpn2	0.180744474712968	0.154723523952536	50	NA	0	RPN2	0.0753149651818659	-0.0433649510693433	254	NA	0
LSM3	-0.00663519764096387	0.39925273954784	527	8.15372374773433e-19	1	NA	NA	NA	NA	NA	NA	NA	NA	NA	NA	NA	NA
LINC02219	-0.428364111110314	-0.396370866553968	195	5.71504972674787e-06	1	NA	NA	NA	NA	NA	NA	NA	NA	NA	NA	NA	NA
SNRPC	0.0743251217917762	0.395704516140643	436	5.04093317113187e-15	1	NA	NA	NA	NA	NA	NA	NA	NA	NA	NA	NA	NA
AURKC	-0.0392386939332453	-0.382793960677918	236	6.97554584857593e-07	1	NA	NA	NA	NA	NA	NA	NA	NA	NA	NA	NA	NA
DNAJC5B	0.332636605429004	0.377685443736407	1341	6.03816324760525e-44	1	Dnajc5b	-0.0790429456527653	-0.0671763813424093	1953	NA	0	DNAJC5B	0.0139209364131904	0.0828818842394185	2881	NA	0
HAGH	0.00154529787045479	0.373921059534351	685	2.19588767860069e-21	1	Hagh	0.0902810585662479	0.220688382384529	1790	2.91751881010724e-18	1	HAGH	-0.000922829401201654	0.0116573636692603	2577	NA	0
CCNB2	-0.00697038509284185	-0.36413027585663	1104	3.54185487873326e-33	1	Ccnb2	0.0911412965614779	0.217608222848421	1104	2.23967913416827e-10	1	CCNB2	0.0317922684437503	0.0209312850271335	1907	NA	0
CCDC34	-0.11412872432654	-0.351180508067241	1591	1.28503604293315e-44	1	Ccdc34	0.0723461215118898	0.0283510851777806	1107	NA	0	CCDC34	-0.153026944096626	-0.143451096301063	924	0.00528719207261904	1
NDUFS3	-0.100575713143745	-0.344079408272712	291	9.71036356485026e-07	1	NA	NA	NA	NA	NA	NA	NA	NA	NA	NA	NA	NA
ADSS2	0.321989535569345	0.337995829105753	335	1.26133520587026e-07	1	Adss	0.098953873118245	0.0923792438496405	141	NA	0	NA	NA	NA	NA	NA	NA
RPS28	-0.0189911879735116	0.337511785672757	654	4.0671909138554e-16	1	NA	NA	NA	NA	NA	NA	RPS28	0.0790029832490569	-0.0315239991040114	566	NA	0
LOC110117498-PIK3R3	-0.327954559534397	-0.331046008760515	238	0.000100875309011998	1	NA	NA	NA	NA	NA	NA	NA	NA	NA	NA	NA	NA
OVOS2	0.238659156743553	0.329575563974511	298	3.28770213600608e-06	1	NA	NA	NA	NA	NA	NA	NA	NA	NA	NA	NA	NA
CALM2	0.186356304949861	0.329103861417709	181	0.00358662466282231	1	Calm2	0.0198635290903096	0.0533206569058641	187	NA	0	NA	NA	NA	NA	NA	NA
MLF1	-0.227081428858913	-0.324550653418613	3298	5.48640911010089e-79	1	Mlf1	-0.140380090870591	-0.131262271709399	2874	1.35125604672772e-09	1	MLF1	-0.738405061110706	-0.767786821090051	4796	0	1
COX17	-0.361032851110229	-0.321338259623323	189	0.00385167590784032	1	Cox17	0.172262012618315	0.175792993282618	784	0.000612485922443171	1	NA	NA	NA	NA	NA	NA
SPTY2D1OS	0.277696542050002	0.321052572176495	2267	9.6257330043587e-53	1	Gm9999	0.674252951324818	0.732970909498505	2331	0	1	LOC105879960	0.301650048402893	0.261153258710067	1761	3.32197352228793e-26	1
RPL35	-0.357816466779806	-0.320038601014221	3959	3.30125394903289e-92	1	NA	NA	NA	NA	NA	NA	RPL35	0.573555372853129	0.866025403784439	3	NA	0
C11orf97	0.0063641436373742	-0.309308844093163	672	1.35675334668158e-13	1	1700012B09Rik	0.147881151701742	0.206720767007266	455	0.00734881710542136	1	NA	NA	NA	NA	NA	NA
LOC100996671	-0.452395399663155	-0.308046075671013	229	0.00118751675571188	1	NA	NA	NA	NA	NA	NA	NA	NA	NA	NA	NA	NA
VRK1	-0.323227809635254	-0.307970491523572	190	0.00909795225805381	1	Vrk1	0.25519461803622	0.146428571428571	15	NA	0	NA	NA	NA	NA	NA	NA
RPS4X	-0.127348423639978	-0.304492943878412	212	0.00373663446164888	1	NA	NA	NA	NA	NA	NA	NA	NA	NA	NA	NA	NA
SLC39A13	-0.233638989532846	-0.300637628832562	433	1.00395286203689e-07	1	Slc39a13	0.357350842474174	0.271887453563924	63	NA	0	SLC39A13	-0.00114949591718995	0.0875110234010265	159	NA	0
RPL17-C18orf32	-0.293233332094547	-0.29825405944414	464	3.23733682194909e-08	1	NA	NA	NA	NA	NA	NA	NA	NA	NA	NA	NA	NA
C12orf29	0.283295103114323	0.296808840392919	250	0.00104699229115611	1	4930430F08Rik	-0.0434885623725643	-0.0324877622640345	30	NA	0	NA	NA	NA	NA	NA	NA
HNRNPH3	0.302967815219118	0.291967271498106	191	0.0245624405453638	1	Hnrnph3	-0.221604369129254	-0.256959334161557	127	2.96841035335006	0	HNRNPH3	0.14275698542134	-0.0226859317757357	82	NA	0
SNRPF	-0.249878279492981	-0.28722605821775	394	3.7761619103333e-06	1	NA	NA	NA	NA	NA	NA	NA	NA	NA	NA	NA	NA
EFCAB13	0.234184919743809	0.286517160649605	187	0.0414431430664518	1	NA	NA	NA	NA	NA	NA	NA	NA	NA	NA	NA	NA
LOC100505841	0.258955585274418	0.285534574371461	1364	3.11673464855527e-24	1	NA	NA	NA	NA	NA	NA	NA	NA	NA	NA	NA	NA
HEMGN	-0.291324179795462	-0.282600130760501	617	5.05718248827773e-10	1	Hemgn	0.0425373838771455	0.0797434032752689	100	NA	0	HEMGN	0.363769779197954	0.436579863662939	1238	3.9990492275967e-56	1
TOMM5	-0.210304710372557	-0.282154122735061	340	7.16161435818644e-05	1	NA	NA	NA	NA	NA	NA	NA	NA	NA	NA	NA	NA
COPS3	0.00511525504702809	-0.281905142800784	460	4.42925723799256e-07	1	NA	NA	NA	NA	NA	NA	COPS3	-0.00608373969439943	0.00948961320461141	307	NA	0
ST7L	0.260131599509779	0.281150320604919	240	0.00576035267473384	1	NA	NA	NA	NA	NA	NA	ST7L	NA	NA	1	NA	0
DYNC1LI1	0.0153974500312111	-0.278667872323992	220	0.0162329315675804	1	NA	NA	NA	NA	NA	NA	NA	NA	NA	NA	NA	NA
FAU	0.25001074651046	0.274149775860619	3316	1.76539330712048e-55	1	Fau	-0.215956691171821	-0.207642087258144	3851	7.53485211963854e-36	1	FAU	-0.0174043384345758	-0.0401314626142296	4385	NA	0
TMEM59	-0.047283413395925	-0.273133747012169	587	9.88579684365603e-09	1	NA	NA	NA	NA	NA	NA	TMEM59	-0.173517851922212	-0.108769353628368	26	NA	0
PRDX6	-0.0561413914451373	-0.270584627135635	377	5.59919794923101e-05	1	Prdx6	-0.358740642849149	0.52704627669473	5	NA	0	PRDX6	-0.00690830325070548	-0.0901968078876063	2722	NA	0
PSMD4	0.0266841260375223	-0.269792499129212	661	1.02246740546732e-09	1	Psmd4	1	1	2	NA	0	PSMD4	-0.00373751761142447	0.00732506835391687	2050	NA	0
MTFR1	-0.268875951771804	-0.269284861933352	539	1.22918557608345e-07	1	Mtfr1	0.0648978431963703	0.0737467234465563	1348	NA	0	MTFR1	0.050542742708926	0.158957653861622	301	2.5128126608293	0
RPS25	-0.0759370895279298	-0.269222270220029	1547	2.52135148658617e-24	1	Rps25	0.0536650109649028	-0.0377538325635191	984	NA	0	NA	NA	NA	NA	NA	NA
TEX35	-0.24536458198884	-0.266193701410505	1311	6.22583945130697e-20	1	Tex35	0.0866689999548292	0.0670268375517333	1634	NA	0	TEX35	-0.00965405722272835	-0.0358020167140679	2248	NA	0
TAFA2	0.301344228805359	0.264705311990275	250	0.0131721537001393	1	NA	NA	NA	NA	NA	NA	NA	NA	NA	NA	NA	NA
ZCWPW1	0.324354880794181	0.263969137163512	674	1.94848146791844e-09	1	NA	NA	NA	NA	NA	NA	NA	NA	NA	NA	NA	NA
NUDCD3	0.0421963447268666	0.263780254736	441	1.10361761682526e-05	1	Nudcd3	-0.462524928700817	-0.586552982725688	15	NA	0	NUDCD3	-0.0723685240278856	-0.211052491201944	116	10.1005829851161	0
ACOT13	-0.02581047850307	-0.255850080289171	1109	2.90627702197441e-15	1	NA	NA	NA	NA	NA	NA	NA	NA	NA	NA	NA	NA
RAD23A	0.0568004596384853	-0.255765858897939	436	3.60490152833404e-05	1	Rad23a	0.100840881463745	-0.0593406593406593	14	NA	0	RAD23A	0.117552719978736	0.0712349740356138	424	NA	0
AXDND1	0.290104245463241	0.25363643229515	499	5.39709491501685e-06	1	NA	NA	NA	NA	NA	NA	AXDND1	-0.307478482873516	-0.376054557965896	38	NA	0
SUPT3H	0.208726455973182	0.25227721662698	310	0.00407007650445709	1	Supt3	0.207134309534816	0.230797477308647	652	2.08005822476764e-06	1	SUPT3H	0.0803712007791813	0.0885781932119351	244	NA	0
TPT1	0.314486659862448	0.246681176970219	3065	5.99580357369236e-41	1	Tpt1	0.115142758200933	0.121171056773006	3563	3.31602987814573e-10	1	NA	NA	NA	NA	NA	NA
TMCO5B	-0.318588864772923	-0.244278801361993	297	0.0122386359882271	1	NA	NA	NA	NA	NA	NA	NA	NA	NA	NA	NA	NA
SECISBP2	-0.208797936921556	-0.241233597354669	1547	3.77343523971317e-19	1	Secisbp2	-0.472998904193168	-0.346277659276753	17	NA	0	SECISBP2	-0.0876292556973203	-0.155985859708864	118	40.3271509743533	0
MZT2B	0.0517368412973187	0.240144398382676	802	3.2623497255172e-09	1	Mzt2	0.145256714889137	0.1710700675369	905	0.000188512390350279	1	NA	NA	NA	NA	NA	NA
C1orf194	-0.23122413569574	-0.233456658921122	2995	1.38075833642457e-35	1	1700013F07Rik	-0.0370217718978998	-0.0320621590507325	2292	NA	0	NA	NA	NA	NA	NA	NA
AMZ2	-0.000900765873898057	-0.232499997729221	766	4.32333013871009e-08	1	Amz2	0.146834451136386	0.160467700318425	1830	4.21695250246047e-09	1	AMZ2	-0.0490039307315138	-0.0311771980093282	2925	NA	0
C5orf58	0.251754068179577	0.231140949935075	667	9.07523576471513e-07	1	NA	NA	NA	NA	NA	NA	NA	NA	NA	NA	NA	NA
NASP	0.2396697420308	0.230078798759909	805	2.32010843010834e-08	1	Nasp	-0.313467156064622	-0.285808221539792	2289	2.33120843253793e-41	1	NASP	-0.101206746796182	-0.0291880215218868	397	NA	0
PTOV1	0.239106840904968	0.228621596866788	468	0.000340055291584018	1	Ptov1	0.110132657602609	0.163836657817338	171	27.0308897998724	0	PTOV1	0.54671672016799	0.486023952430111	13	NA	0
CREB1	-0.213260619881297	-0.226004046429047	378	0.0053818789555525	1	NA	NA	NA	NA	NA	NA	CREB1	0.212103795134365	0.107633000413735	19	NA	0
TNRC6B	-0.233186287879644	-0.22542491314477	448	0.000846157202238789	1	Tnrc6b	0.0485698778879209	0.178571428571429	7	NA	0	TNRC6B	NA	NA	1	NA	0
CEBPZ	0.0638799647703958	0.225408243726126	312	0.0347262368471264	1	NA	NA	NA	NA	NA	NA	NA	NA	NA	NA	NA	NA
LOC105372145	0.287896771622095	0.224219921697573	348	0.0143124206523289	1	NA	NA	NA	NA	NA	NA	NA	NA	NA	NA	NA	NA
SPATA6	-0.208938457560501	-0.223983579804588	2271	1.90993991854461e-24	1	Spata6	-0.139512533826535	-0.12283522859209	1346	0.00519438690545255	1	SPATA6	0.15428892212496	0.0985309916185379	4509	NA	0
FHL5	0.229315170272025	0.223570365196049	1137	1.41637250165594e-11	1	Fhl5	0.0127571685572653	0.139734070105688	1239	0.000661960511577393	1	FHL5	0.199272806875854	0.226101152601614	1015	1.37305529852141e-10	1
WDR54	-0.0276351563398067	-0.223142233478216	547	7.89458367513414e-05	1	Wdr54	-0.215056524504371	-0.218391294632548	1000	2.43954728077294e-09	1	WDR54	0.0891103230830253	0.133212148938899	78	NA	0
NDUFA8	-0.0560784347887412	-0.21968882434721	618	2.02448957947987e-05	1	NA	NA	NA	NA	NA	NA	NA	NA	NA	NA	NA	NA
EFCAB11	-0.223062807555507	-0.21942559263476	1352	1.97066493332467e-13	1	Efcab11	0.252765424711335	-0.5	3	NA	0	NA	NA	NA	NA	NA	NA
PHF7	0.240702997274839	0.217924166642189	899	2.35269581950023e-08	1	Phf7	0.148609513640255	0.151388979436028	579	0.214675549914193	0	PHF7	-0.0242759344852028	0.00400808443771916	905	NA	0
CDV3	-0.193543845594489	-0.216163449074141	327	0.0479472209126406	1	Cdv3	0.0344997996931866	-0.0222193230793301	1701	NA	0	CDV3	0.15515296338719	0.086560589039859	11	NA	0
RBIS	-0.0709187485643837	0.213462696331432	341	0.0418288666205639	1	NA	NA	NA	NA	NA	NA	NA	NA	NA	NA	NA	NA
TCP1	-0.0337515690098603	0.211130594756536	361	0.0311036903728614	1	Tcp1	-0.0941399366695049	-0.0971123058245687	1960	NA	0	NA	NA	NA	NA	NA	NA
ORMDL2	0.0239405684650883	0.20679588185275	468	0.00381469705967942	1	NA	NA	NA	NA	NA	NA	NA	NA	NA	NA	NA	NA
SNRPA1	-0.00474008423178366	-0.205737230085264	634	0.000102133157530714	1	Snrpa1	0.0200920908920098	-0.0760128447227542	289	NA	0	NA	NA	NA	NA	NA	NA
KDELR2	-0.00846321203579162	-0.205452629561158	848	9.17320612741555e-07	1	NA	NA	NA	NA	NA	NA	NA	NA	NA	NA	NA	NA
LCMT1	-0.110294123826131	-0.203503208137315	403	0.0227688137775919	1	Lcmt1	0.0322323818498065	0.0125145325388217	572	NA	0	NA	NA	NA	NA	NA	NA
EFCAB10	0.163692004211931	0.202594227410427	474	0.00517783369421093	1	Efcab10	0.319710835094741	0.316739342881328	2141	3.57062774812714e-48	1	NA	NA	NA	NA	NA	NA
TMEM89	-0.015853221386304	-0.201293912719401	550	0.00114891682786406	1	NA	NA	NA	NA	NA	NA	TMEM89	0.0349522661502679	-0.00115884508425362	945	NA	0
ABCA17P	-0.239642679720085	-0.200347562248438	958	2.32266665214706e-07	1	NA	NA	NA	NA	NA	NA	NA	NA	NA	NA	NA	NA
PLAAT1	-0.0255378784769613	-0.200282052103466	1431	1.21025547074934e-11	1	Plaat1	0.0907249502741495	0.0104068850885274	1671	NA	0	NA	NA	NA	NA	NA	NA
CCDC82	0.0239524275889357	0.200050474691914	593	0.000534626800726774	1	NA	NA	NA	NA	NA	NA	CCDC82	0.051445706114086	-0.0527634554177797	203	NA	0
EDRF1-AS1	-0.187736354184631	-0.19963492912111	388	0.0442957224002762	1	NA	NA	NA	NA	NA	NA	NA	NA	NA	NA	NA	NA
RPL38	-0.114246570310101	-0.197547257164837	3547	9.04818788097257e-30	1	NA	NA	NA	NA	NA	NA	NA	NA	NA	NA	NA	NA
RPL15	0.00915717516923745	0.196640694203567	1817	1.59095399987872e-14	1	Rpl15	0.0312204217920671	-0.0459550815820195	225	NA	0	NA	NA	NA	NA	NA	NA
TMEM219	-0.187494498765353	-0.195886458762044	985	3.32718573330649e-07	1	Tmem219	-0.0895247381851278	-0.253463077112152	169	0.740862687555056	0	NA	NA	NA	NA	NA	NA
PSMC5	0.0521782873433383	-0.195560826624008	1139	1.64745205054305e-08	1	Psmc5	0.270919010068864	0.408165950950874	1558	1.0993472645554e-60	1	PSMC5	-0.0324892032983095	-0.0385143819424552	2420	NA	0
SRSF5	-0.220127260242624	-0.194903715920426	439	0.0231887778408751	1	Srsf5	-0.0177238546949793	0.0936553211438571	14	NA	0	NA	NA	NA	NA	NA	NA
SUB1	0.0377939387081212	0.193912868005327	719	9.45419763649703e-05	1	NA	NA	NA	NA	NA	NA	NA	NA	NA	NA	NA	NA
SREK1IP1	-0.188129619473229	-0.192854910064017	650	0.000429015010582164	1	Srek1ip1	0.223611196474722	0.20363959573442	134	15.3144354685925	0	SREK1IP1	0.388546193595604	0.4	4	NA	0
EWSR1	0.031247362603235	0.190905359644765	667	0.000401406812383937	1	Ewsr1	0.169113044142531	0.131621528466794	1277	0.00198169972901762	1	NA	NA	NA	NA	NA	NA
CEP112	-0.188608097402401	-0.190452255980741	2024	3.25450246009449e-15	1	Cep112	-0.215840579756756	-0.156431124709068	1910	5.21368689805806e-09	1	CEP112	-0.0471832707826611	-0.100190803750435	3047	1.31443385281843e-05	1
ATP5F1A	0.0185932454431174	0.189588400023515	560	0.00369204869220688	1	NA	NA	NA	NA	NA	NA	NA	NA	NA	NA	NA	NA
COMMD6	0.232801144893473	0.188450259435767	647	0.00081569201516048	1	NA	NA	NA	NA	NA	NA	COMMD6	NA	NA	1	NA	0
ALKBH7	0.0259055712728412	0.188164172400271	3259	1.39169499711973e-24	1	Alkbh7	0.296442640513509	0.415756800353893	459	1.09469682579583e-17	1	ALKBH7	0.228926492985449	0.263036622460435	773	4.68485416158212e-11	1
TMEM258	-0.168140148080534	-0.187259810073229	1313	4.68713835529675e-09	1	Tmem258	-0.0236463739817892	-0.454271229759069	1176	5.12626993494755e-58	1	NA	NA	NA	NA	NA	NA
CCT2	-0.160949323581457	-0.185465885826819	2514	4.04080171394722e-18	1	NA	NA	NA	NA	NA	NA	NA	NA	NA	NA	NA	NA
COMMD1	-0.010202501249274	0.185179390202445	623	0.00192927191347696	1	Commd1	0.116457538281715	-0.000124563031469276	206	NA	0	COMMD1	0.219169346362279	0.150285475789049	97	NA	0
CPSF3	0.0432823889298517	-0.182566334246458	467	0.042741286779659	1	NA	NA	NA	NA	NA	NA	NA	NA	NA	NA	NA	NA
RPL10	-0.215832430746673	-0.181192173506465	560	0.00946071866725114	1	NA	NA	NA	NA	NA	NA	NA	NA	NA	NA	NA	NA
KLHDC9	0.0157627584330917	-0.179804718197072	719	0.000719196527356358	1	NA	NA	NA	NA	NA	NA	KLHDC9	-0.078666836154658	-0.120642447369989	271	20.7877746115332	0
CHMP2A	0.0827563098790342	0.173904350959694	554	0.0228063917485608	1	Chmp2a	0.224918585387661	0.294592528874281	1578	4.85187182402623e-30	1	CHMP2A	0.000311851277491827	0.0924556830003079	79	NA	0
C16orf95	0.159637002215768	0.170234276364986	1104	7.43096909641171e-06	1	NA	NA	NA	NA	NA	NA	NA	NA	NA	NA	NA	NA
GKAP1	-0.163974145290237	-0.169580711108942	2321	1.15078845856548e-13	1	Gkap1	-0.196594464774742	-0.190050024872216	1781	5.05491452365166e-13	1	GKAP1	0.317733986929782	0.188225217488763	1071	2.35724405925281e-07	1
CRNDE	0.176330535630794	0.169325188398378	2444	2.08275242971282e-14	1	NA	NA	NA	NA	NA	NA	NA	NA	NA	NA	NA	NA
NRDC	0.208248788072146	0.166482551462432	713	0.00463983060500043	1	Nrd1	-0.176385815806632	0.0416370500409062	60	NA	0	NRDC	0.114001091184068	0.221552011149523	2504	1.42078761122572e-26	1
USP2-AS1	-0.174798028945103	-0.165986920866544	572	0.0391729033987893	1	NA	NA	NA	NA	NA	NA	NA	NA	NA	NA	NA	NA
CABS1	0.0213965043629342	0.165724973244858	1123	1.3699202530241e-05	1	NA	NA	NA	NA	NA	NA	NA	NA	NA	NA	NA	NA
C1orf56	0.0594141301103141	-0.16502359660137	1228	3.53636620962598e-06	1	Gm128	0.0930855156132182	0.108676408020965	1921	0.00151158953428001	1	NA	NA	NA	NA	NA	NA
LPP	0.154943397171409	0.163840916453515	871	0.000687931795114855	1	Lpp	0.272432948668564	0.4	4	NA	0	LPP	-0.2194693440744	-0.22264584396465	1302	1.91552429241016e-13	1
C15orf61	0.145436745220574	0.162610174234198	1099	3.50261121705519e-05	1	2300009A05Rik	0.00747696252004469	0.0977743488442005	1249	NA	0	NA	NA	NA	NA	NA	NA
CHPT1	-0.170234974198217	-0.162183386950026	1801	2.59272603676281e-09	1	Chpt1	0.121268075605068	0.0747927826193656	403	NA	0	CHPT1	-0.0509867854452816	-0.0664498942673616	1720	NA	0
ADRM1	0.165417748631027	0.160017180515912	1528	1.86738734538668e-07	1	Adrm1	0.075020064556664	0.394027724434025	603	6.55868814782123e-21	1	ADRM1	0.0384093811895412	0.0431065024503476	2878	NA	0
C9orf24	0.151057865856058	0.159478295249358	1799	6.04137255837344e-09	1	1110017D15Rik	0.0582853853698902	0.0456573202536996	2960	NA	0	NA	NA	NA	NA	NA	NA
REC114	0.028864854474592	0.159246621910855	617	0.0418805793065429	1	Rec114	-0.999633364567833	-0.866025403784439	3	NA	0	REC114	-0.221664980641366	-0.407296714265643	10	NA	0
ATP5MD	-0.15222131710755	-0.157956551094322	2009	6.35643279549814e-10	1	Atp5md	-0.15911652964192	-0.160641104482134	1316	3.87671443252921e-06	1	NA	NA	NA	NA	NA	NA
RABAC1	-0.0398479605515737	-0.157013292307175	631	0.0440536575482251	1	Rabac1	-0.0860896037598009	-0.11173537057866	1149	0.123600352452854	0	RABAC1	-0.0439436753853645	-0.070734374600596	4085	NA	0
SYCP1	0.134156782296305	0.156013650778999	911	0.00131516769433538	1	Sycp1	-0.0437621234354402	-0.0537108366455401	749	NA	0	NA	NA	NA	NA	NA	NA
COX6C	-0.084116842716756	-0.155659776462421	3055	2.96204988634393e-15	1	Cox6c	0.0103769048913319	0.112406997699178	2179	0.000120193588226174	1	NA	NA	NA	NA	NA	NA
LOC730183	-0.0410466460355613	-0.152665756914929	909	0.00222499471946096	1	NA	NA	NA	NA	NA	NA	NA	NA	NA	NA	NA	NA
C20orf141	-0.0511695340864709	0.152246584813756	873	0.00367823031898997	1	NA	NA	NA	NA	NA	NA	NA	NA	NA	NA	NA	NA
SPATA42	-0.221104328543011	-0.151351052212545	1285	2.9448856834697e-05	1	NA	NA	NA	NA	NA	NA	NA	NA	NA	NA	NA	NA
PSMD6	0.198895967424012	0.150992103319075	2091	2.31043979201348e-09	1	Psmd6	-0.0171145176804183	-0.494718869255935	968	5.6960723754605e-58	1	LOC109730163	-0.00392336346928303	0.292645313046725	1265	9.32851077299548e-24	1
LINC01676	0.193734487414109	0.150081237402505	1199	0.000105009275876045	1	NA	NA	NA	NA	NA	NA	NA	NA	NA	NA	NA	NA
GIHCG	-0.163949356812009	-0.148090541216784	947	0.00278988436426086	1	NA	NA	NA	NA	NA	NA	NA	NA	NA	NA	NA	NA
EDF1	0.0641175186542291	0.144400418811953	1199	0.000302939226908665	1	Edf1	-0.0120939325108718	0.0974415137809577	2320	NA	0	NA	NA	NA	NA	NA	NA
BANF2	0.147927635480517	0.14299986999816	1079	0.00141846788818223	1	Banf2	0.23988127858887	0.232778488191715	454	0.00044382029664961	1	BANF2	-0.390075212832271	-0.295411439743989	400	7.45372017764624e-07	1
RPL31	-0.0881781633788507	-0.140531285337058	3461	5.85208377708524e-14	1	NA	NA	NA	NA	NA	NA	RPL31	-0.0577157188285875	0.0446990156267674	13	NA	0
MICOS13	0.184192501483687	0.140522553853624	1630	7.18180350183288e-06	1	Micos13	-0.156405222886279	-0.150119332403536	2425	9.04195757043612e-11	1	NA	NA	NA	NA	NA	NA
NDUFB4	-0.0462895513515552	0.14019994122087	1573	1.38952567908694e-05	1	NA	NA	NA	NA	NA	NA	NDUFB4	-0.471619953672688	-0.774596669241483	4	NA	0
C1orf100	0.138419216850236	0.14016504702461	1084	0.00213279591073303	1	1700016C15Rik	0.150307150398784	0.119302474423243	978	0.154493293135853	0	NA	NA	NA	NA	NA	NA
RPS27	-0.131156788852018	-0.139173097785341	4162	1.11193479641004e-16	1	NA	NA	NA	NA	NA	NA	NA	NA	NA	NA	NA	NA
FAM229B	-0.153574170254944	-0.137934013151766	3239	1.85851347323987e-12	1	Fam229b	0.311269057336278	0.28235540422526	3831	3.17829558657001e-68	1	FAM229B	-0.141552142898257	-0.0850134057273697	5073	NA	0
RPS3	0.156707107401834	0.137599437238887	2002	3.72746200389556e-07	1	NA	NA	NA	NA	NA	NA	RPS3	-0.0514787381759075	-0.167557661660495	500	0.07358465390297	0
NAA38	-0.126871660954947	-0.135765058842823	1111	0.0032998023226437	1	Naa38	-0.0405461120060077	-0.162784425702863	1406	6.93982206443809e-07	1	NAA38	0.184078253657349	0.117697148097082	396	8.41944838014012	0
SKP1	0.0085801153047071	-0.135596211972167	1260	0.000802566612384061	1	NA	NA	NA	NA	NA	NA	NA	NA	NA	NA	NA	NA
RPL27A	0.0142707516601594	-0.132711019066162	1959	2.19439556536982e-06	1	Rpl27a	0.0960462603098245	-0.000902732839798137	414	NA	0	NA	NA	NA	NA	NA	NA
OTUD6B-AS1	-0.00771239898246211	0.131387948873657	1025	0.0144369476471043	1	NA	NA	NA	NA	NA	NA	NA	NA	NA	NA	NA	NA
UBXN4	0.105658867841207	0.131301563485864	2037	1.59971018530707e-06	1	Ubxn4	-0.0787480668979781	-0.0589606356931858	316	NA	0	UBXN4	0.069568466921558	0.0685476507237614	1978	NA	0
DNAJC21	0.105432438484118	0.128420178649252	1458	0.000511279674348776	1	Dnajc21	-0.041444392790283	-0.143983649819308	697	0.114423480660428	0	DNAJC21	-0.0123663095005812	-0.0169903670817624	1994	NA	0
EIF5A2	0.142439548307828	0.128107671045783	1192	0.00539170451345274	1	NA	NA	NA	NA	NA	NA	EIF5A2	0.0939137549475891	0.113260622895133	1323	0.0160287340710442	1
ROPN1B	0.0163289173004958	0.120830079252753	2638	2.82507729375436e-07	1	NA	NA	NA	NA	NA	NA	NA	NA	NA	NA	NA	NA
CDIPTOSP	0.143592344223675	0.120158609733525	1894	9.22684341144891e-05	1	NA	NA	NA	NA	NA	NA	NA	NA	NA	NA	NA	NA
SPATA18	0.0605861747919566	0.117393297631962	1227	0.0221421889941413	1	Spata18	0.0368512903816369	0.0170599164455963	1163	NA	0	SPATA18	0.0046393728868049	0.00657722632767128	2990	NA	0
PSMA4	0.0444722005499983	0.116688631695514	1424	0.00597130850562239	1	Psma4	0.0733068592405107	0.203378782183659	201	3.16991692455711	0	PSMA4	-0.0746813724711398	-0.0990303004715266	1028	NA	0
ATP5IF1	-0.0713416273408989	-0.114972778168033	2213	3.44721580933648e-05	1	Atpif1	0.364050713712059	0.333935479077464	1860	9.16208044005875e-47	1	ATPIF1	-0.0103470514527807	-0.251929269153226	2150	7.76663255339809e-30	1
PTMA	-0.10028752165639	-0.114261047965444	1794	0.000720660313638622	1	NA	NA	NA	NA	NA	NA	NA	NA	NA	NA	NA	NA
GAPDHS	0.0676056000374363	0.112522093220707	2045	0.00019877659905814	1	Gapdhs	0.0875507887921585	0.212798990494655	2080	8.38720219178232e-20	1	GAPDHS	0.107444828638396	0.0860660057177951	3606	NA	0
RPS6	0.111911697361414	0.112452221836267	4224	1.36171146211417e-10	1	Rps6	-0.0179537440288302	-0.190036297074777	1819	2.49956042407052e-13	1	RPS6	0.319876455790818	0.445309069404404	466	1.95112205702881e-21	1
RPS13	0.0873644489658652	0.111949665776036	3539	1.42446757069561e-08	1	Rps13	0.029703174818724	-0.0528846929535295	1129	NA	0	RPS13	-0.00600300914988513	0.00849972528962816	269	NA	0
SURF2	0.111333366471352	0.111126558769736	1906	0.000680697645243824	1	NA	NA	NA	NA	NA	NA	SURF2	0.0252348002392649	0.0305750912490024	1820	NA	0
EIF1	-0.0448024496340282	-0.109315669596783	2686	7.95374961130263e-06	1	Eif1	-0.0245944650950399	0.0672800540400027	3278	NA	0	EIF1	0.00269808864678157	0.00809017939941738	5028	NA	0
IFT57	0.0985841583488908	0.102188827238944	2486	0.000194218044680565	1	Ift57	-0.10568801996297	-0.301729489972459	76	NA	0	IFT57	0.0302506772429912	0.0255004952932371	2030	NA	0
RPS2	-0.0483964106589131	-0.101806748999767	1982	0.00329787643484012	1	NA	NA	NA	NA	NA	NA	NA	NA	NA	NA	NA	NA
RPS24	0.107262672074319	0.101432794737408	2807	4.26177766633729e-05	1	Rps24	0.139079617113982	0.189347079424867	4048	4.61289042435677e-31	1	NA	NA	NA	NA	NA	NA
