# Supplementary figures and images for: RNA splicing programs define tissue compartments and cell types at single-cell resolution
Source: eLife journal article supplement (doi:10.7554/elife.70692), 2021-09-13

MYL6

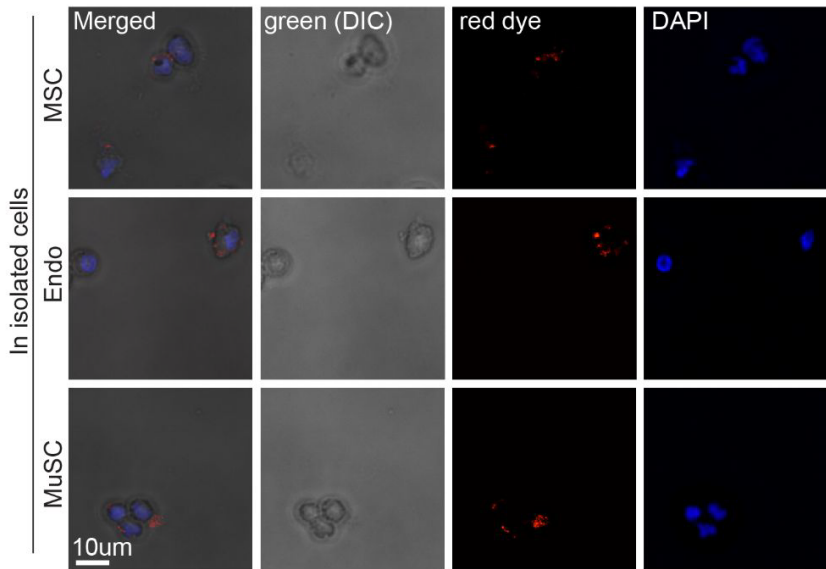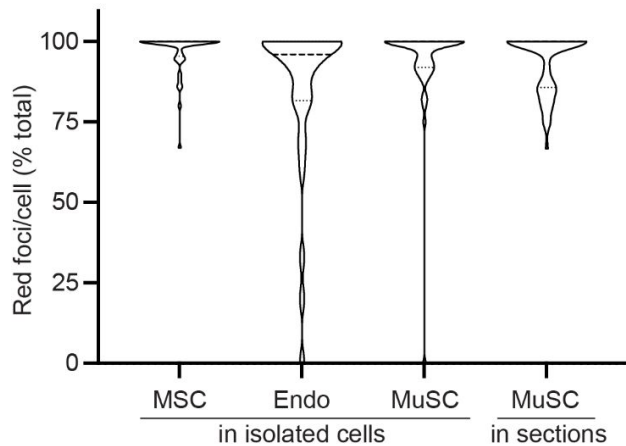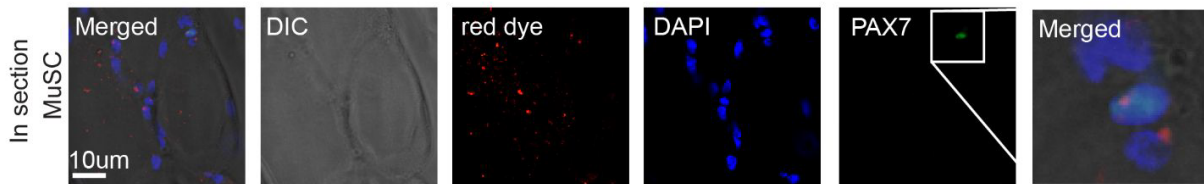

Supplement: supp [file elife-70692-supp-v1.zip]

MYL6  
gene expression

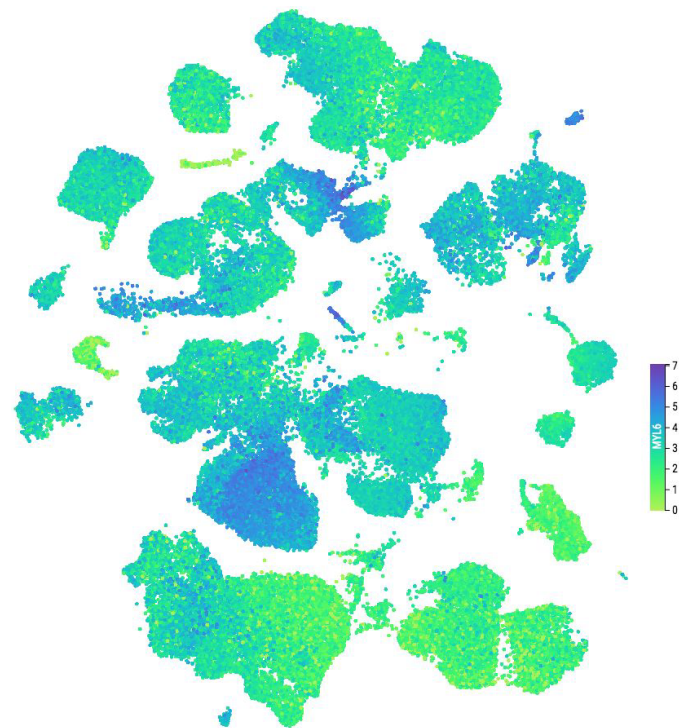

MYL6  
SpliZ value

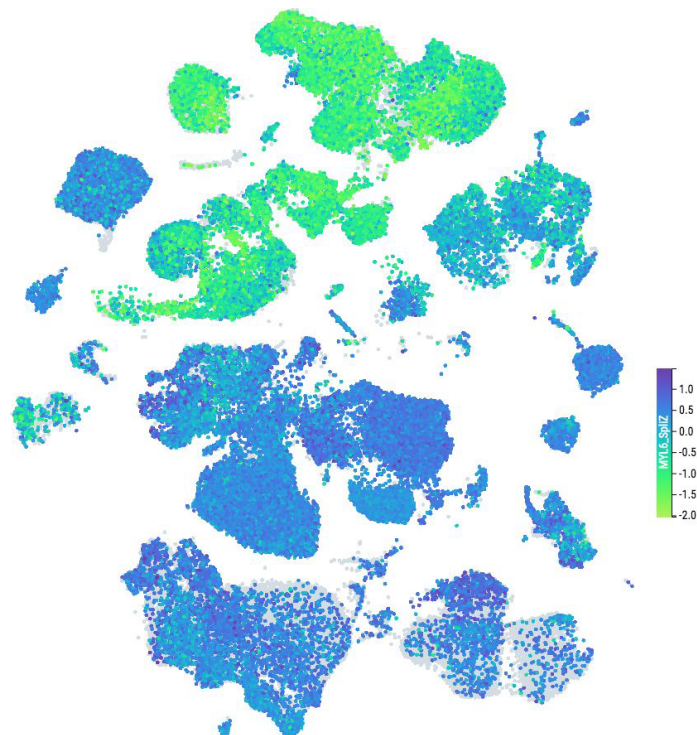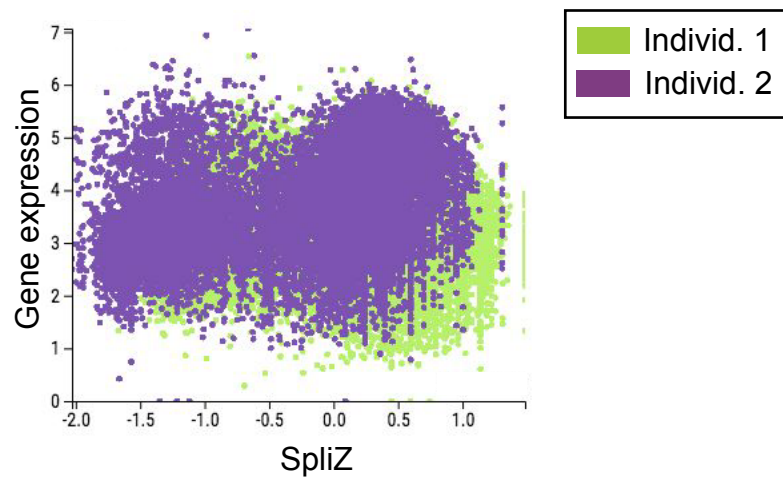

Supplement: supp [file elife-70692-supp-v1.zip]

ATP5F1C  
gene expression

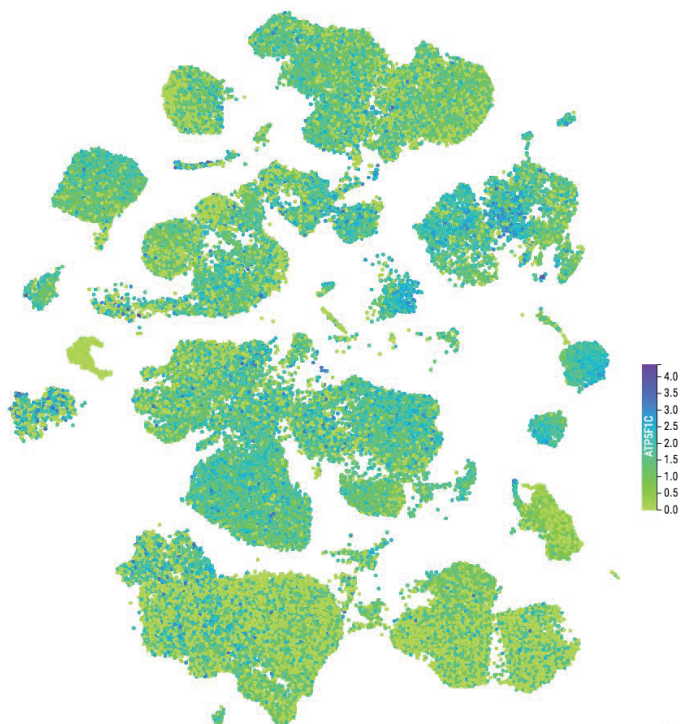

ATP5F1C  
SpliZ value

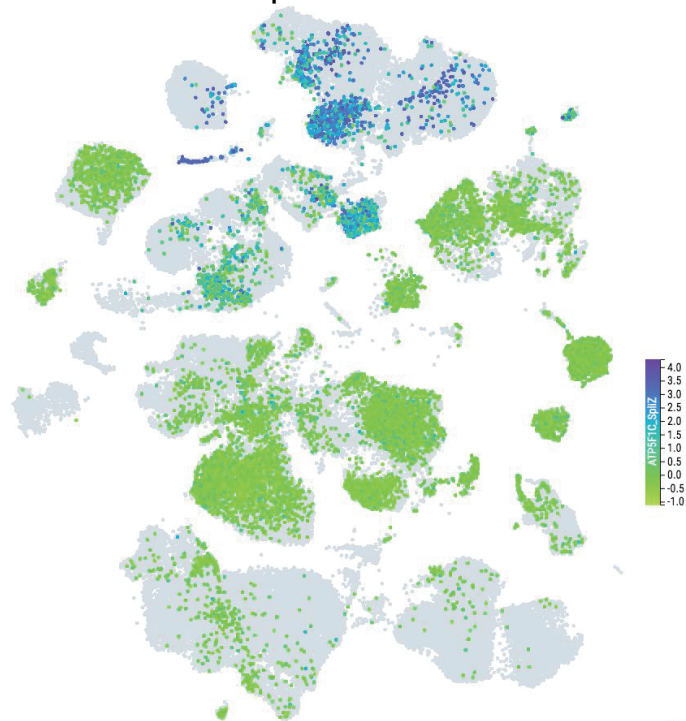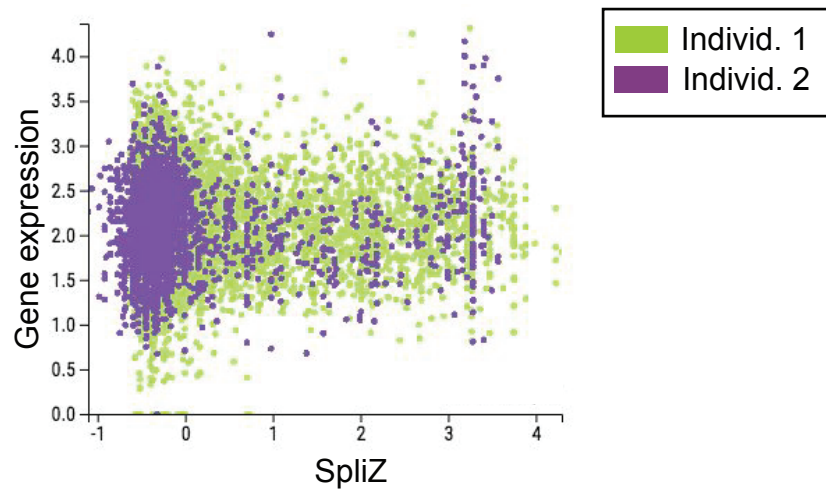

Supplement: supp [file elife-70692-supp-v1.zip]

RPS24  
gene expression

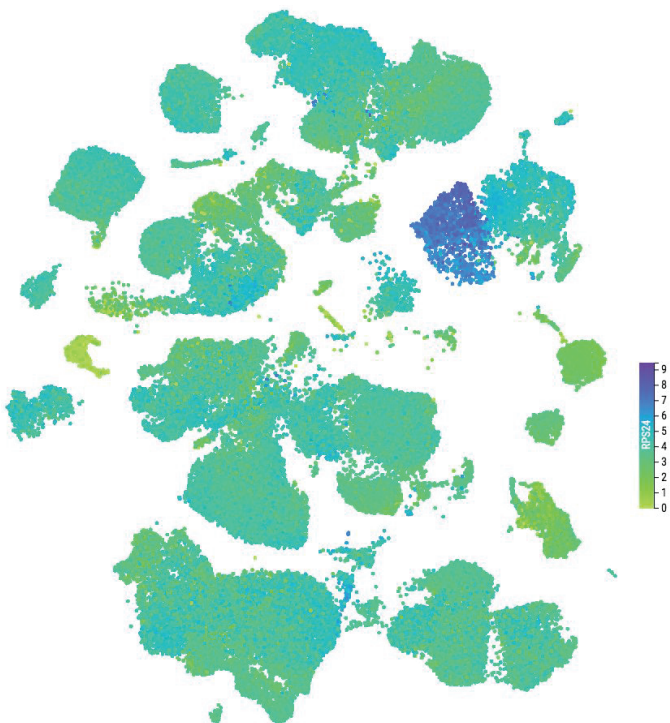

RPS24  
SpliZ value

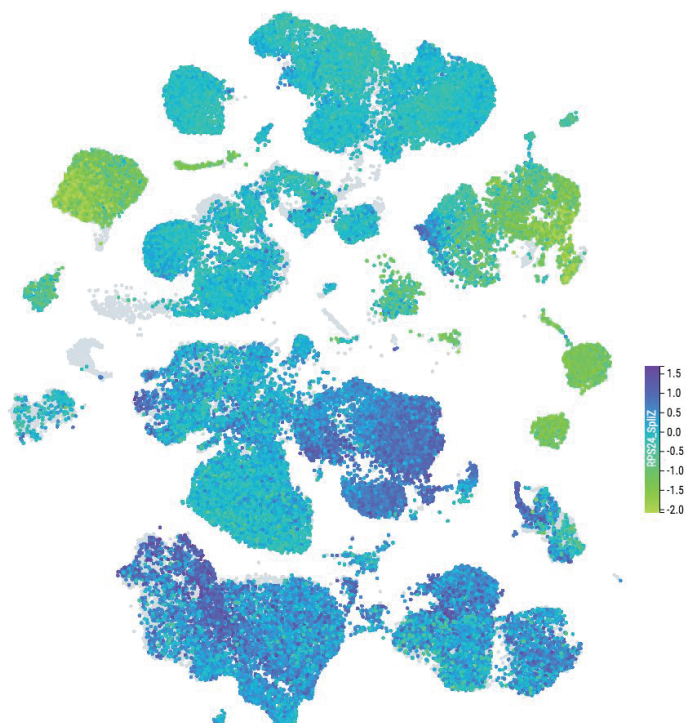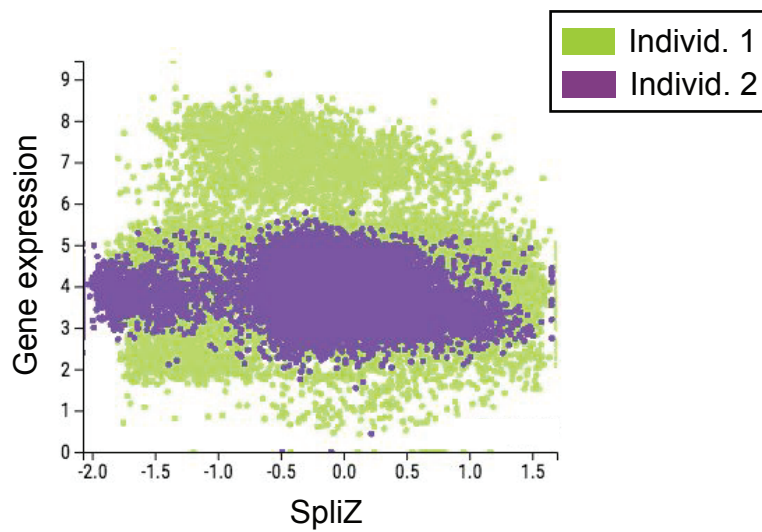

Supplement: supp [file elife-70692-supp-v1.zip › elife_poa_e70692_Figure_2_figure_supplement_2.pdf]

A

## Human

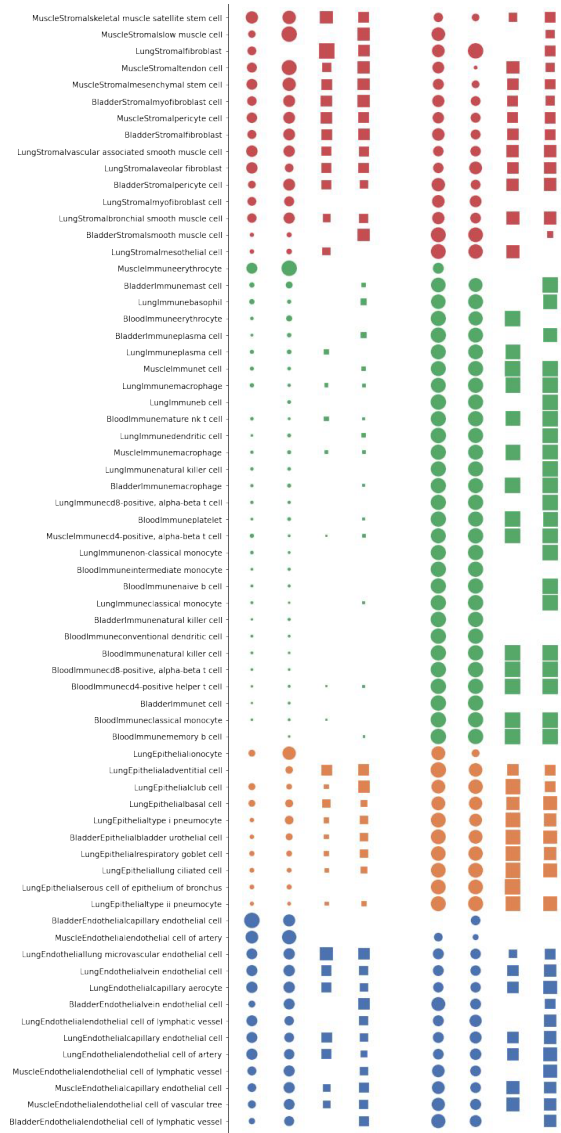

B

## Mouse lemur

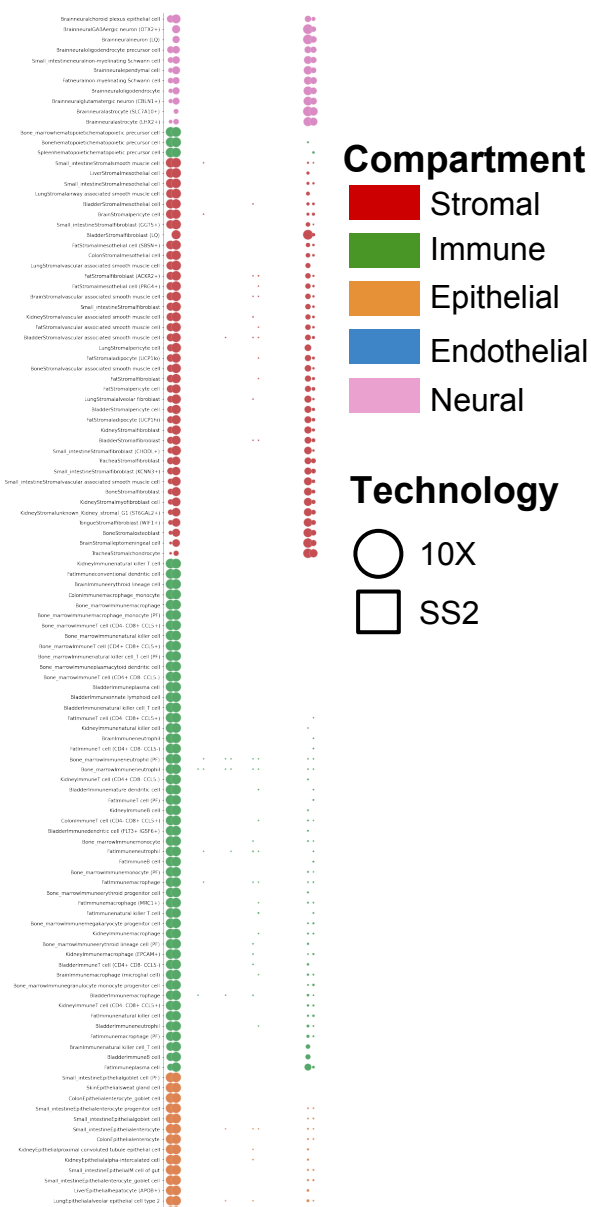

## Compartment

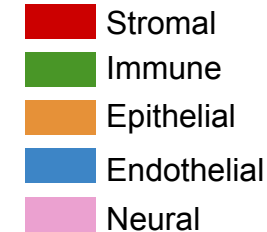

## Technology

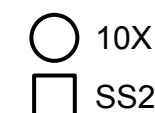

C

## Mouse

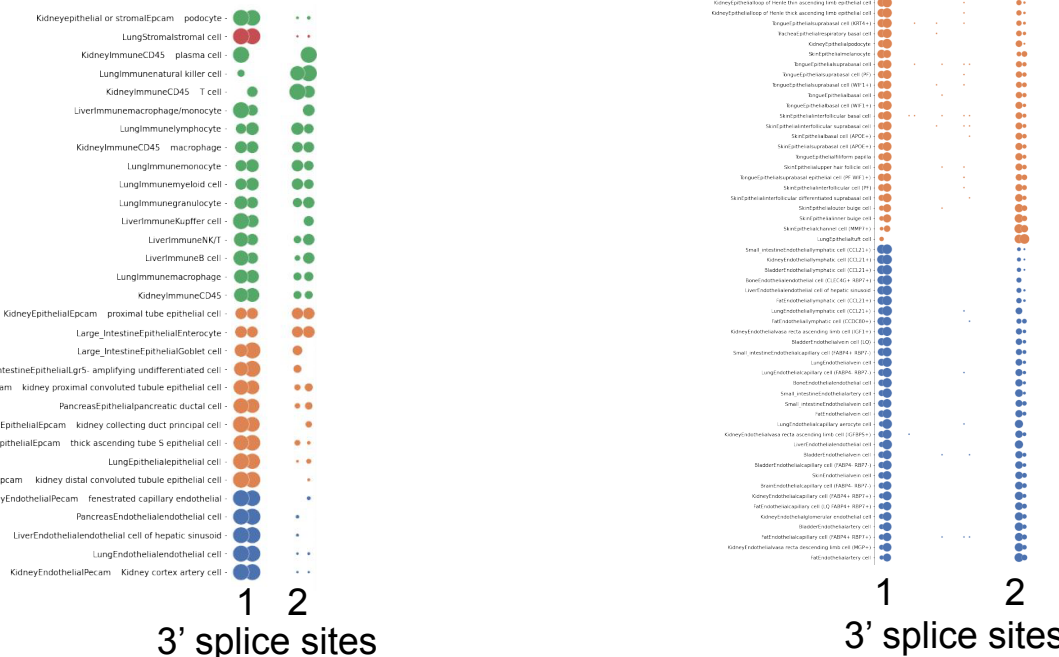

Supplement: supp [file elife-70692-supp-v1.zip › elife_poa_e70692_Figure_3_figure_supplement_1.pdf]

# RPS24

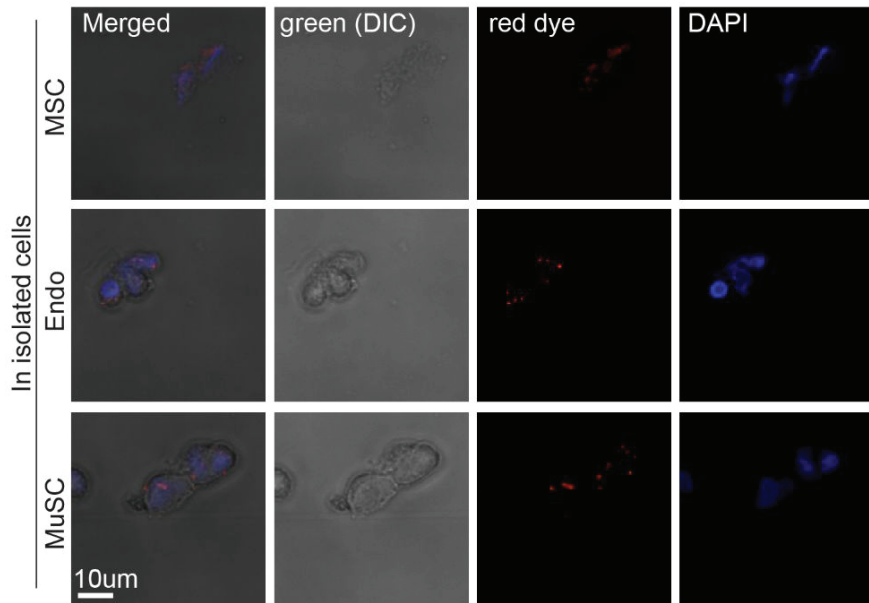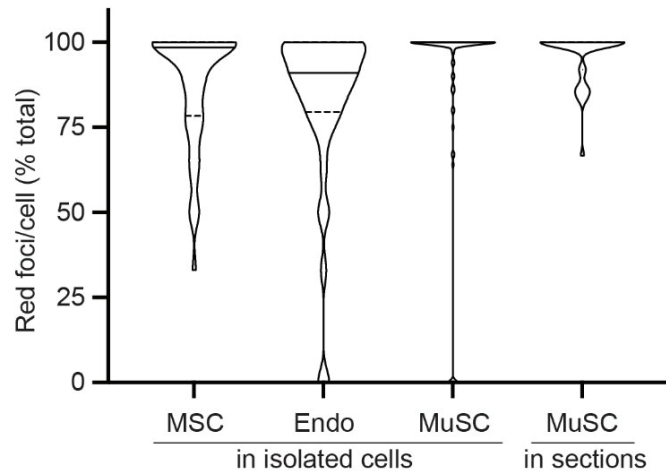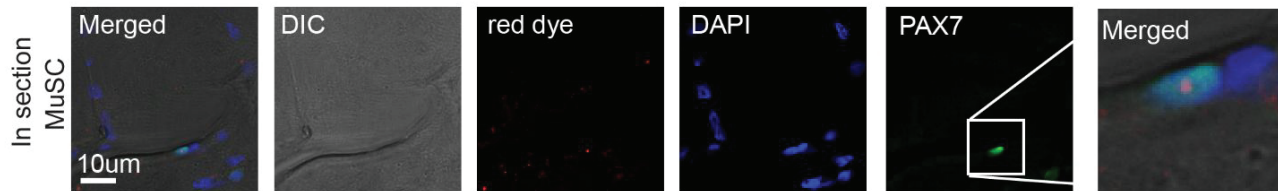

Supplement: supp [file elife-70692-supp-v1.zip › elife_poa_e70692_Figure_4_figure_supplement_1.pdf]

**A**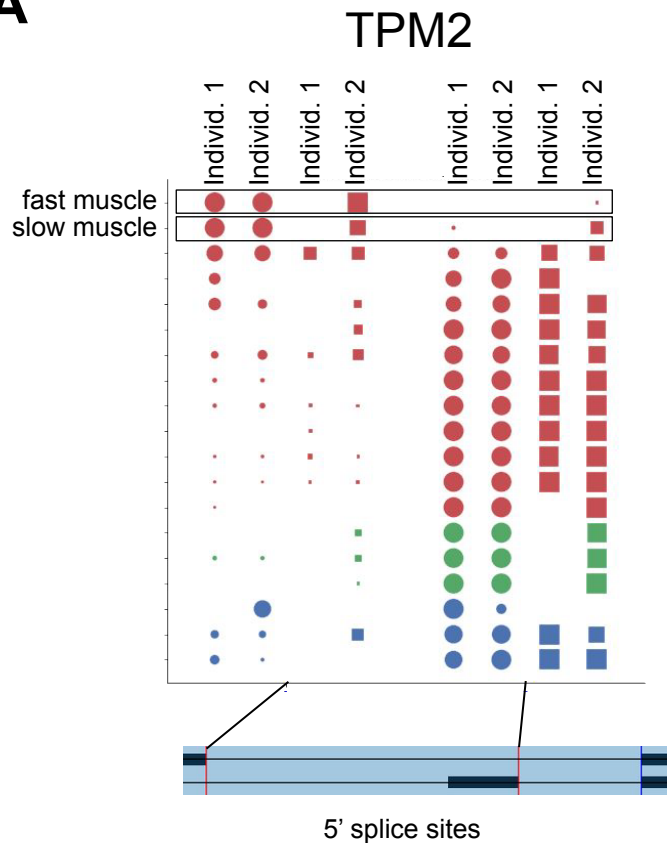**B**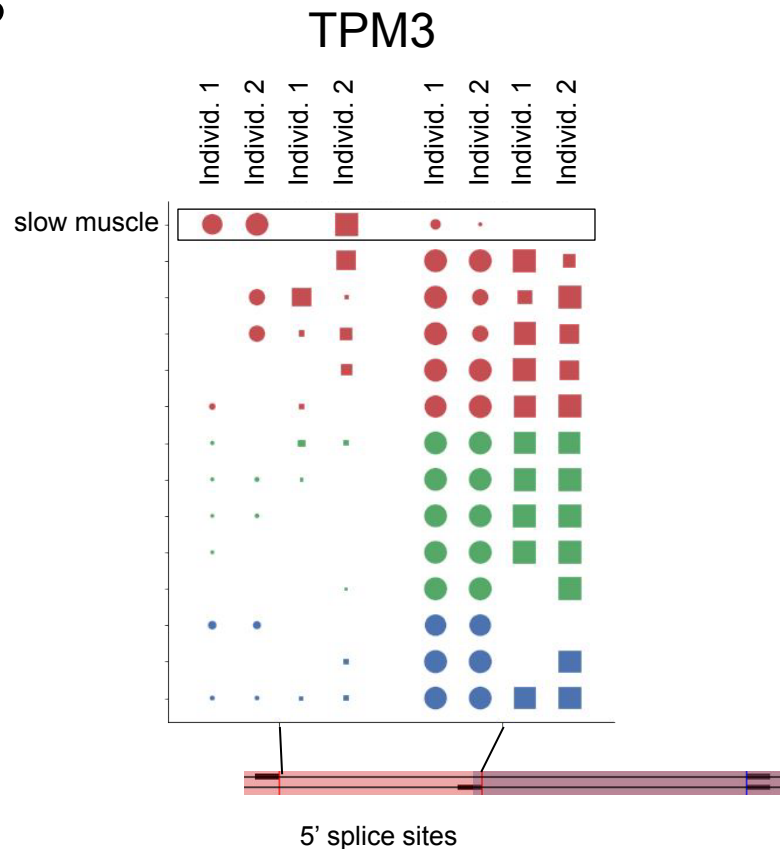**Compartment**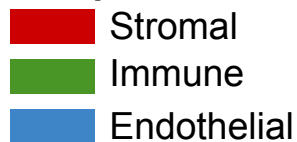**Technology**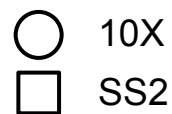

Supplement: supp [file elife-70692-supp-v1.zip › elife_poa_e70692_Figure_6_figure_supplement_1.pdf]

# Protein domains

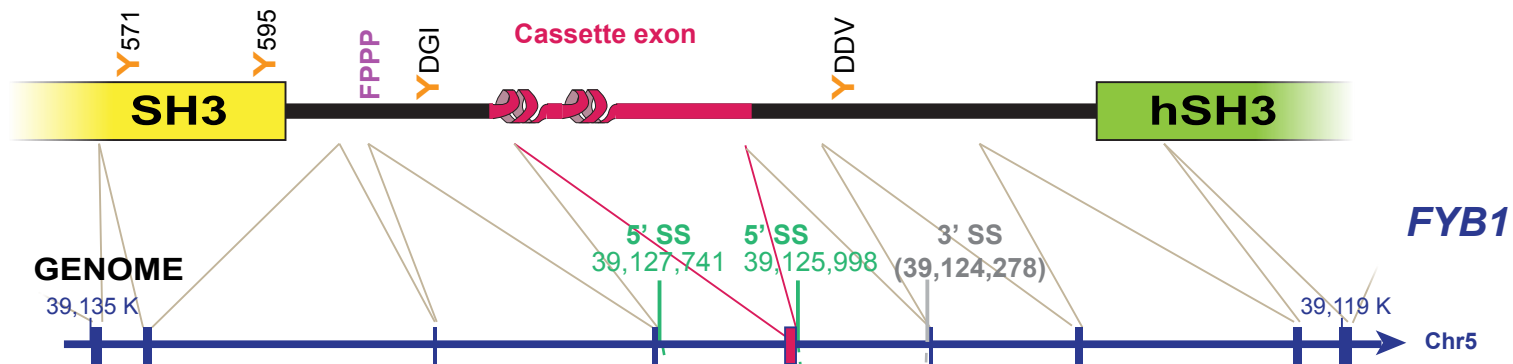

## Technology

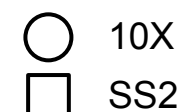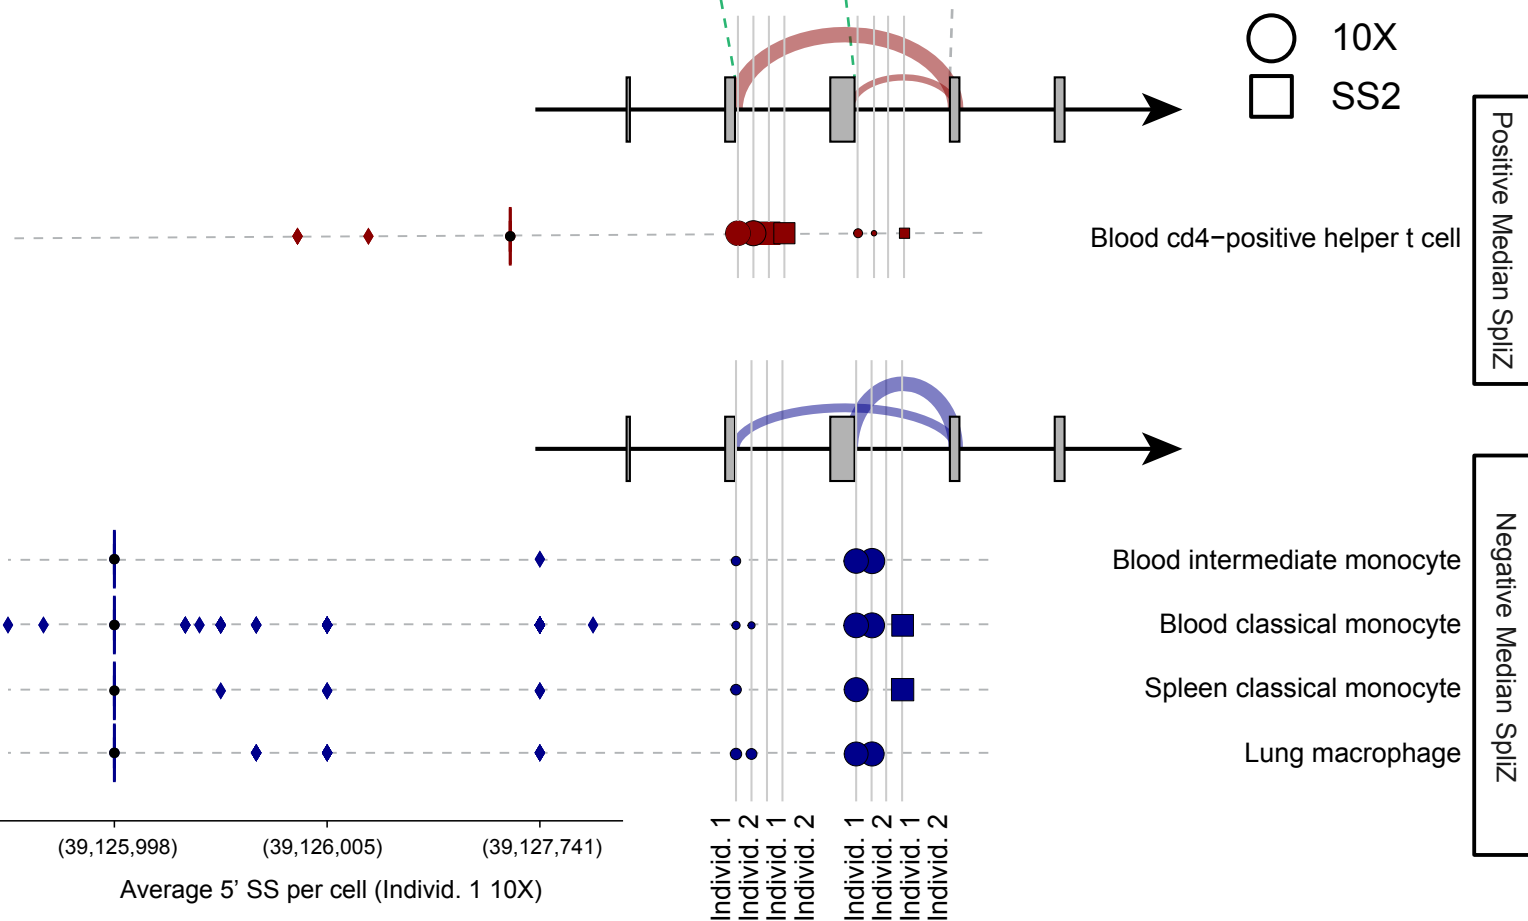

Supplement: supp [file elife-70692-supp-v1.zip › elife_poa_e70692_Figure_7_figure_supplement_1.pdf]

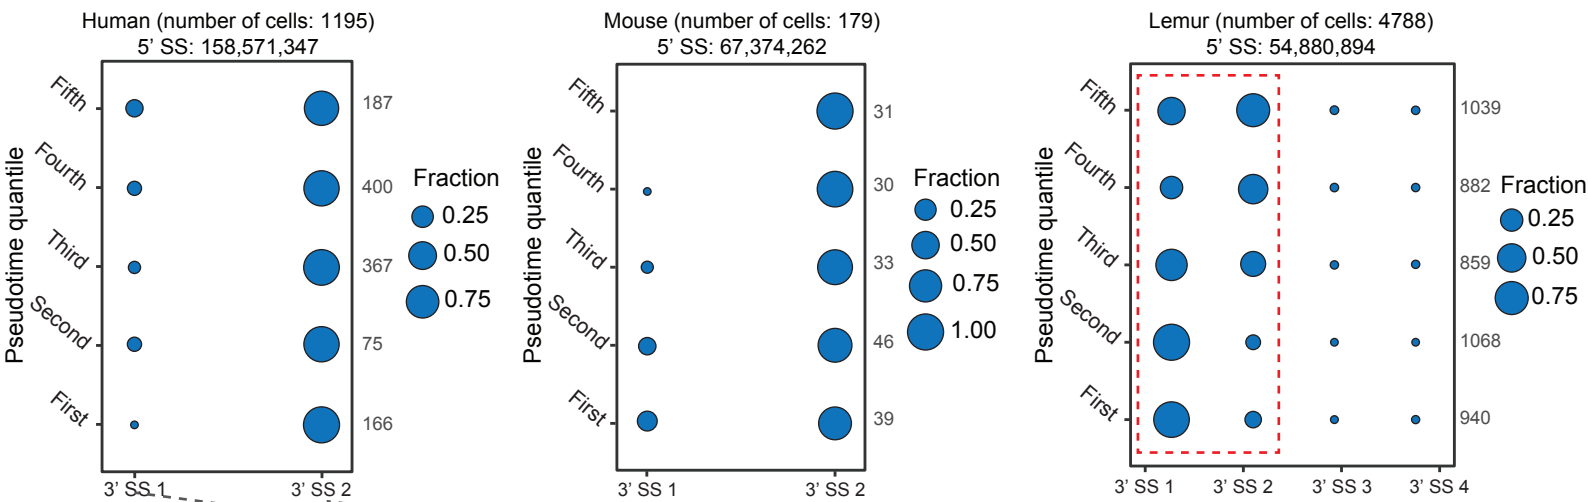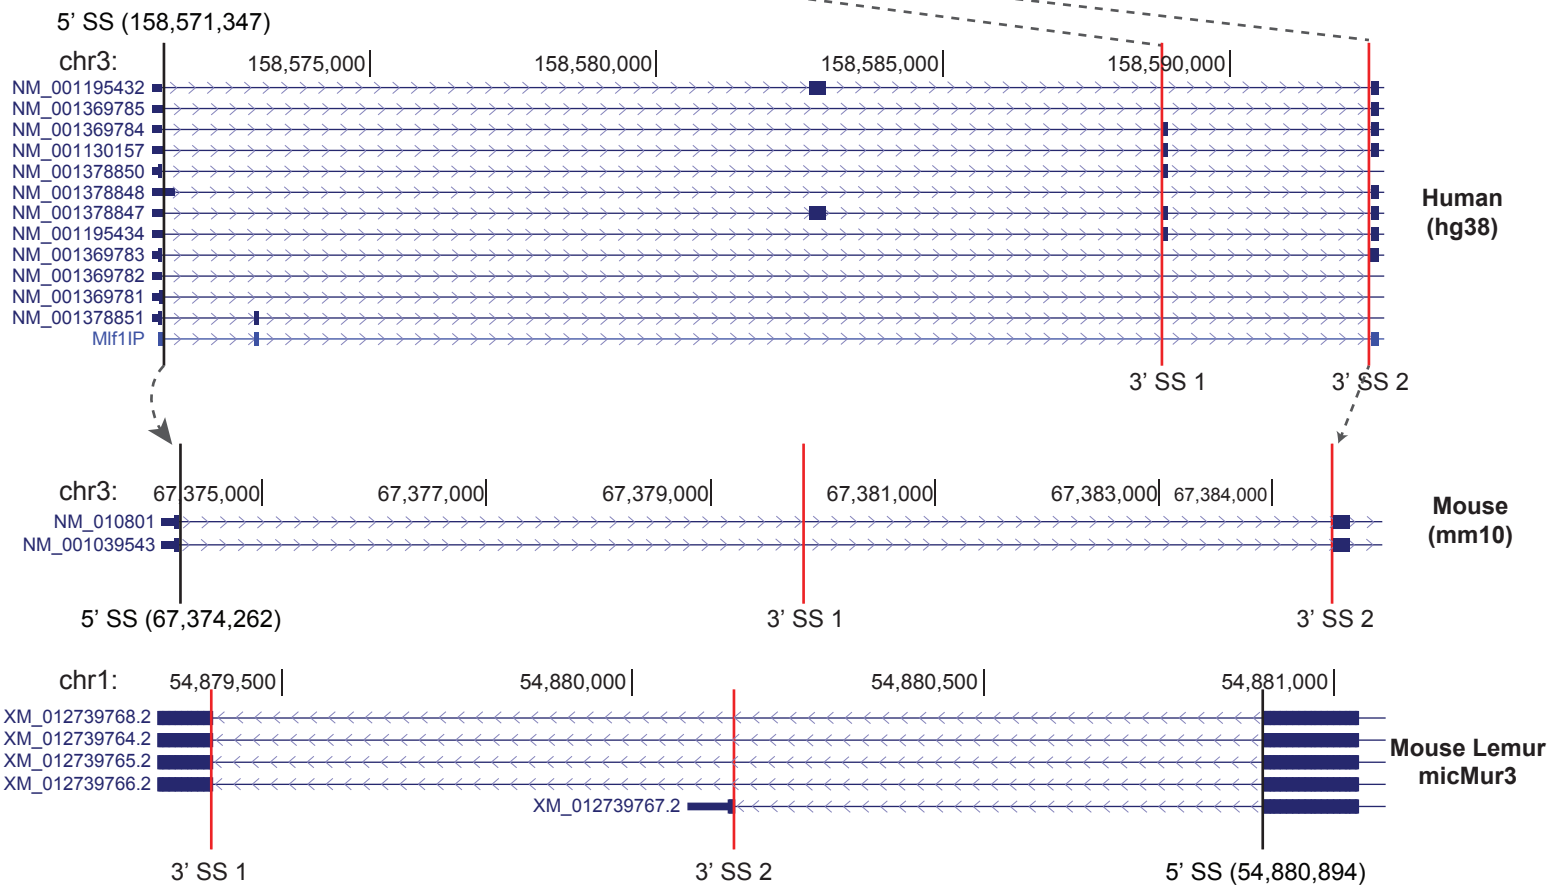

Supplement: supp [file elife-70692-supp-v1.zip › elife_poa_e70692_Figure_8_figure_supplement_1.pdf]

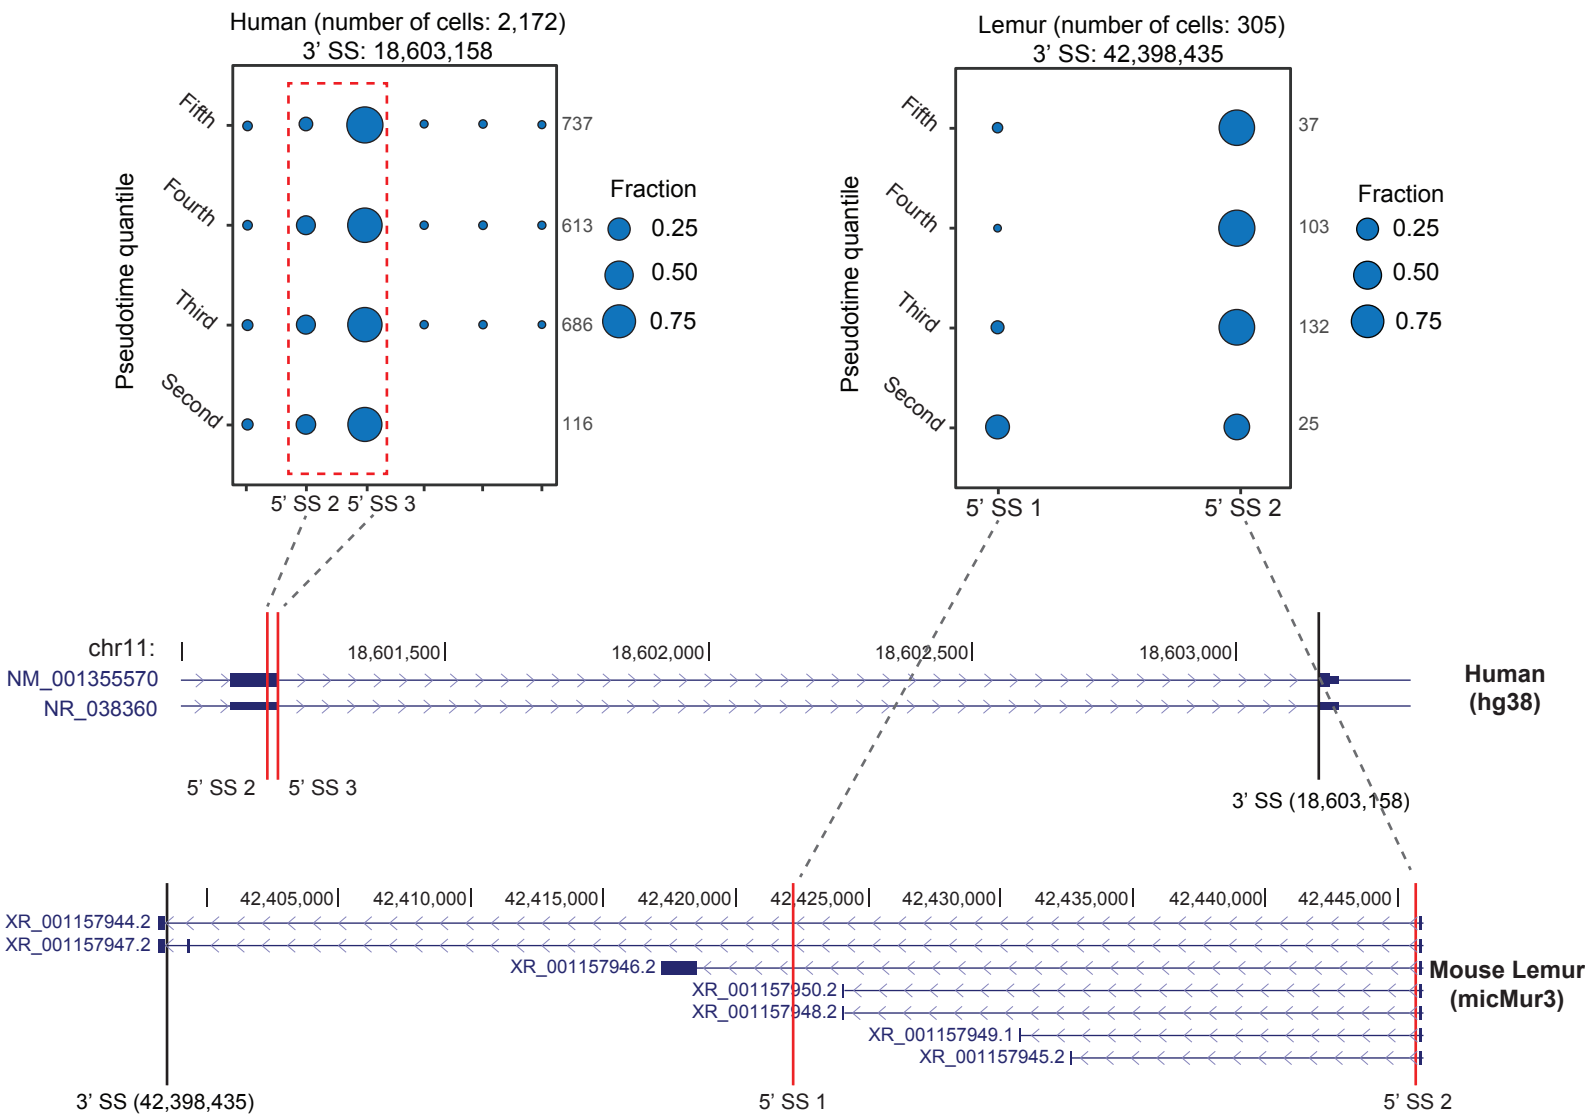

Supplement: supp [file elife-70692-supp-v1.zip › elife_poa_e70692_Figure_8_figure_supplement_2.pdf]
